# Supplementary material for: Quantitative proteomic profiling of primary cancer-associated fibroblasts in oesophageal adenocarcinoma
Source: PubMed Central journal article supplement (PMC5943522; doi:10.1038/s41416-018-0042-9), 2018-03-29
Supplement: 41416_2018_42_MOESM1_ESM.pdf [file 41416_2018_42_MOESM1_ESM.pdf]

**Supplementary Table 1. Analysed proteins (peptide FDR p<0.05)**

| Accession | Description                                                                                                               | ΣCoverage | Σ# Proteins | Σ# Unique Peptides | Σ# Peptides | Σ# PSMs | CAF1/NO | CAF2/NO | CAF3/NO | CAF4/NO | Score A(3,6) | Coverage A(3,6) | # Peptides A(3,6) | # PSM A(3,6) | # AAs | MW [kDa] | calc. pI |
|-----------|---------------------------------------------------------------------------------------------------------------------------|-----------|-------------|--------------------|-------------|---------|---------|---------|---------|---------|--------------|-----------------|-------------------|--------------|-------|----------|----------|
|           |                                                                                                                           |           |             |                    |             |         | F1      | F2      | F3      | F4      |              |                 |                   |              |       |          |          |
| Q9NRX3    | NADH dehydrogenase [ubiquinone] 1 alpha subcomplex subunit 4-like 2 OS=Homo sapiens GN=NDUFA4L2 PE=2 SV=1 - [NUA4L_HUMAN] | 9.20      | 1           | 1                  | 1           | 1       | 0.092   | 0.553   | 0.956   | 0.107   | 2.54         | 9.20            | 1                 | 1            | 87    | 10.0     | 9.92     |
| P25940    | Collagen alpha-3(V) chain OS=Homo sapiens GN=COL5A3 PE=1 SV=3 - [COL5A3_HUMAN]                                            | 1.55      | 1           | 1                  | 1           | 1       | 0.833   | 0.206   | 0.265   | 0.121   | 0.00         | 1.55            | 1                 | 1            | 1745  | 172.0    | 6.87     |
| Q9H7Z6    | Histone acetyltransferase KAT8 OS=Homo sapiens GN=KAT8 PE=1 SV=2 - [KAT8_HUMAN]                                           | 1.53      | 1           | 1                  | 1           | 1       | 0.264   | 0.628   | 0.723   | 0.121   | 0.00         | 1.53            | 1                 | 1            | 458   | 52.4     | 8.27     |
| Q8WYJ6    | Septin-1 OS=Homo sapiens GN=SEPT1 PE=1 SV=2 - [SEPT1_HUMAN]                                                               | 8.45      | 1           | 2                  | 2           | 2       | 1.574   | 0.082   | 0.101   | 0.122   | 3.27         | 8.45            | 2                 | 2            | 367   | 41.9     | 5.80     |
| Q8NA66    | Cyclic nucleotide-binding domain-containing protein 1 OS=Homo sapiens GN=CNBD1 PE=2 SV=1 - [CNBD1_HUMAN]                  | 2.75      | 1           | 1                  | 1           | 2       | 0.256   | 0.468   | 0.816   | 0.131   | 0.00         | 2.75            | 1                 | 2            | 436   | 50.2     | 9.07     |
| P53801    | Pituitary tumor-transforming gene 1 protein-interacting protein OS=Homo sapiens GN=PTTG1IP PE=1 SV=1 - [PTTG_HUMAN]       | 10.56     | 1           | 2                  | 2           | 4       | 1.324   | 0.162   | 0.379   | 0.136   | 4.18         | 10.56           | 3                 | 4            | 180   | 20.3     | 8.79     |
| Q15772    | Striated muscle preferentially expressed protein kinase OS=Homo sapiens GN=SPEG PE=1 SV=4 - [SPEG_HUMAN]                  | 0.55      | 1           | 1                  | 2           | 4       | 0.257   | 0.901   | 0.618   | 0.143   | 7.79         | 0.55            | 2                 | 4            | 3267  | 354.1    | 8.51     |
| P26927    | Hepatocyte growth factor-like protein OS=Homo sapiens GN=MST1 PE=1 SV=2 - [HGFL_HUMAN]                                    | 3.38      | 2           | 1                  | 1           | 2       | 0.198   | 0.468   | 0.598   | 0.164   | 0.00         | 3.38            | 1                 | 2            | 711   | 80.3     | 7.68     |

|        |                                                                                                                  |       |   |    |    |    |       |       |       |       |        |       |    |    |      |       |      |
|--------|------------------------------------------------------------------------------------------------------------------|-------|---|----|----|----|-------|-------|-------|-------|--------|-------|----|----|------|-------|------|
| Q13360 | Zinc finger protein 177<br>OS=Homo sapiens<br>GN=ZNF177<br>PE=2 SV=4 - [ZNF177_HUMAN]                            | 1.46  | 1 | 1  | 1  | 1  | 3.089 | 1.671 | 1.425 | 0.164 | 2.39   | 1.46  | 1  | 1  | 481  | 54.7  | 8.18 |
| P17936 | Insulin-like growth factor-binding protein 3<br>OS=Homo sapiens<br>GN=IGFBP3<br>PE=1 SV=2 - [IGFBP3_HUMAN]       | 20.62 | 1 | 5  | 5  | 22 | 0.301 | 0.198 | 0.802 | 0.167 | 41.32  | 20.62 | 10 | 22 | 291  | 31.7  | 8.69 |
| P26022 | Pentraxin-related protein PTX3<br>OS=Homo sapiens<br>GN=PTX3<br>PE=1 SV=3 - [PTX3_HUMAN]                         | 23.62 | 1 | 7  | 7  | 19 | 0.148 | 0.563 | 1.086 | 0.168 | 36.29  | 23.62 | 12 | 19 | 381  | 41.9  | 5.01 |
| Q16647 | Prostaglandin synthase<br>OS=Homo sapiens<br>GN=PTGIS<br>PE=1 SV=1 - [PTGIS_HUMAN]                               | 30.80 | 1 | 12 | 12 | 97 | 0.351 | 1.698 | 1.745 | 0.170 | 223.29 | 30.80 | 22 | 97 | 500  | 57.1  | 7.31 |
| Q9NZU5 | LIM and cysteine-rich domains protein 1<br>OS=Homo sapiens<br>GN=LMCD1<br>PE=1 SV=1 - [LMCD1_HUMAN]              | 49.04 | 1 | 18 | 18 | 70 | 0.259 | 0.325 | 0.987 | 0.179 | 182.03 | 49.04 | 28 | 70 | 365  | 40.8  | 7.93 |
| Q14116 | Interleukin-18<br>OS=Homo sapiens<br>GN=IL18 PE=1 SV=1 - [IL18_HUMAN]                                            | 11.92 | 1 | 3  | 3  | 6  | 6.183 | 0.093 | 0.473 | 0.185 | 12.68  | 11.92 | 5  | 6  | 193  | 22.3  | 4.67 |
| P32297 | Neuronal acetylcholine receptor subunit alpha-3<br>OS=Homo sapiens<br>GN=CHRNA3<br>PE=1 SV=4 - [ACHA3_HUMAN]     | 4.16  | 1 | 1  | 1  | 3  | 0.275 | 0.756 | 0.195 | 0.00  | 4.16   | 4.16  | 1  | 3  | 505  | 57.4  | 6.46 |
| Q9Y4C4 | Malignant fibrous histiocytoma-amplified sequence 1<br>OS=Homo sapiens<br>GN=MFHAS1<br>PE=1 SV=2 - [MFHA1_HUMAN] | 1.90  | 1 | 2  | 2  | 9  | 0.199 | 1.380 | 0.658 | 0.198 | 16.24  | 1.90  | 3  | 9  | 1052 | 116.9 | 7.88 |
| O95760 | Interleukin-33<br>OS=Homo sapiens<br>GN=IL33 PE=1 SV=1 - [IL33_HUMAN]                                            | 2.96  | 1 | 1  | 1  | 1  | 1.812 | 0.792 | 0.475 | 0.205 | 2.36   | 2.96  | 1  | 1  | 270  | 30.7  | 8.66 |

|        |                                                                                                                   |       |   |    |    |     |       |       |       |       |        |       |    |     |      |       |      |
|--------|-------------------------------------------------------------------------------------------------------------------|-------|---|----|----|-----|-------|-------|-------|-------|--------|-------|----|-----|------|-------|------|
| P08243 | Asparagine synthetase [glutamine-hydrolyzing]<br>OS=Homo sapiens<br>GN=ASNS<br>PE=1 SV=4 - [ASNS_HUMAN]           | 27.09 | 1 | 14 | 14 | 57  | 0.284 | 0.485 | 0.574 | 0.207 | 114.24 | 27.09 | 22 | 57  | 561  | 64.3  | 6.86 |
| P08729 | Keratin, type II cytoskeletal 7<br>OS=Homo sapiens<br>GN=KRT7<br>PE=1 SV=5 - [K2C7_HUMAN]                         | 46.48 | 3 | 19 | 26 | 218 | 0.281 | 0.287 | 1.116 | 0.212 | 463.08 | 46.48 | 47 | 218 | 469  | 51.4  | 5.48 |
| P22674 | Cydin-O<br>OS=Homo sapiens<br>GN=CCNO<br>PE=1 SV=2 - [CCNO_HUMAN]                                                 | 4.57  | 1 | 1  | 1  | 1   |       | 0.841 | 1.654 | 0.214 | 2.49   | 4.57  | 1  | 1   | 350  | 38.1  | 8.06 |
| Q2WGJ9 | Fer-1-like protein 6<br>OS=Homo sapiens<br>GN=FER1L6<br>PE=2 SV=2 - [FR1L6_HUMAN]                                 | 0.59  | 1 | 1  | 1  | 2   | 0.673 | 0.733 | 0.920 | 0.224 | 1.77   | 0.59  | 1  | 2   | 1857 | 209.2 | 6.38 |
| P47895 | Aldehyde dehydrogenase family 1 member A3<br>OS=Homo sapiens<br>GN=ALDH1A3<br>PE=1 SV=2 - [AL1A3_HUMAN]           | 34.57 | 1 | 15 | 18 | 55  | 0.402 | 0.329 | 0.450 | 0.232 | 148.96 | 34.57 | 28 | 55  | 512  | 56.1  | 7.25 |
| Q8IVG5 | Sterile alpha motif domain-containing protein 9-like<br>OS=Homo sapiens<br>GN=SAMD9L<br>PE=1 SV=2 - [SAM9L_HUMAN] | 2.78  | 3 | 3  | 5  | 5   | 1.245 | 0.665 | 0.521 | 0.232 | 9.59   | 2.78  | 5  | 5   | 1584 | 184.4 | 8.02 |
| P35908 | Keratin, type II cytoskeletal 2 epidermal<br>OS=Homo sapiens<br>GN=KRT2<br>PE=1 SV=2 - [K22E_HUMAN]               | 23.47 | 2 | 8  | 14 | 39  | 0.432 | 3.835 | 0.819 | 0.232 | 107.32 | 23.47 | 21 | 39  | 639  | 65.4  | 8.00 |
| Q9BXM0 | Periaxin<br>OS=Homo sapiens<br>GN=PRX PE=1 SV=2 - [PRAX_HUMAN]                                                    | 1.92  | 1 | 2  | 3  | 3   | 3.267 | 0.114 | 0.139 | 0.233 | 5.72   | 1.92  | 3  | 3   | 1461 | 154.8 | 7.50 |
| P05120 | Plasminogen activator inhibitor 2<br>OS=Homo sapiens<br>GN=SERPINB2<br>PE=1 SV=2 - [PAI2_HUMAN]                   | 1.93  | 1 | 1  | 1  | 15  | 0.053 | 0.706 | 1.550 | 0.236 | 28.50  | 1.93  | 2  | 15  | 415  | 46.6  | 5.63 |

|        |                                                                                                             |       |   |    |    |     |       |       |       |       |        |       |    |     |      |       |      |
|--------|-------------------------------------------------------------------------------------------------------------|-------|---|----|----|-----|-------|-------|-------|-------|--------|-------|----|-----|------|-------|------|
| Q495C1 | Probable E3 SUMO-protein ligase RNF212<br>OS=Homo sapiens<br>GN=RNF212<br>PE=2 SV=1 - [RNF212_HUMAN]        | 4.38  | 1 | 1  | 2  | 3   | 0.375 | 0.595 | 0.844 | 0.253 | 7.71   | 4.38  | 2  | 3   | 297  | 33.3  | 8.68 |
| P07197 | Neurofilament medium polypeptide<br>OS=Homo sapiens<br>GN=NEFM<br>PE=1 SV=3 - [NEFM_HUMAN]                  | 2.18  | 2 | 1  | 3  | 130 | 0.298 | 0.705 | 0.973 | 0.254 | 321.02 | 2.18  | 6  | 130 | 916  | 102.4 | 4.91 |
| Q9Y2J2 | Band 4.1-like protein 3<br>OS=Homo sapiens<br>GN=EPB41L3<br>PE=1 SV=2 - [E41L3_HUMAN]                       | 18.49 | 2 | 12 | 15 | 46  | 0.147 | 0.566 | 0.516 | 0.256 | 126.27 | 18.49 | 24 | 46  | 1087 | 120.6 | 5.19 |
| Q8N4C9 | Uncharacterized protein C17orf78<br>OS=Homo sapiens<br>GN=C17orf78<br>PE=2 SV=2 - [CQ078_HUMAN]             | 10.91 | 1 | 2  | 2  | 2   | 0.265 | 0.700 | 0.881 | 0.257 | 4.62   | 10.91 | 2  | 2   | 275  | 30.5  | 9.55 |
| Q10588 | ADP-ribosyl cyclase/cyclic ADP-ribose hydrolase 2<br>OS=Homo sapiens<br>GN=BST1<br>PE=1 SV=2 - [BST1_HUMAN] | 8.18  | 1 | 3  | 3  | 7   | 0.807 | 0.582 | 0.654 | 0.260 | 26.25  | 8.18  | 4  | 7   | 318  | 35.7  | 7.80 |
| P02533 | Keratin, type I cytoskeletal 14<br>OS=Homo sapiens<br>GN=KRT14<br>PE=1 SV=4 - [K1C14_HUMAN]                 | 20.13 | 7 | 2  | 12 | 40  | 1.763 | 2.020 | 0.506 | 0.261 | 77.58  | 20.13 | 18 | 40  | 472  | 51.5  | 5.16 |
| P05783 | Keratin, type I cytoskeletal 18<br>OS=Homo sapiens<br>GN=KRT18<br>PE=1 SV=2 - [K1C18_HUMAN]                 | 60.00 | 5 | 21 | 24 | 101 | 0.402 | 0.906 | 1.184 | 0.261 | 228.99 | 60.00 | 37 | 101 | 430  | 48.0  | 5.45 |
| O76070 | Gamma-synudein<br>OS=Homo sapiens<br>GN=SNCG<br>PE=1 SV=2 - [SYUG_HUMAN]                                    | 55.91 | 1 | 5  | 5  | 16  | 0.436 | 0.535 | 0.873 | 0.263 | 27.75  | 55.91 | 8  | 16  | 127  | 13.3  | 4.86 |
| Q3ZCW2 | Galectin-related protein<br>OS=Homo sapiens<br>GN=LGALS1<br>PE=1 SV=2 - [LEGL_HUMAN]                        | 5.23  | 1 | 1  | 1  | 2   | 0.389 | 0.816 | 0.550 | 0.265 | 7.24   | 5.23  | 2  | 2   | 172  | 19.0  | 5.35 |

|        |                                                                                                                       |       |    |   |   |    |       |       |       |       |       |       |    |    |      |       |      |
|--------|-----------------------------------------------------------------------------------------------------------------------|-------|----|---|---|----|-------|-------|-------|-------|-------|-------|----|----|------|-------|------|
| O95229 | ZW10<br>interactor<br>OS=Homo sapiens<br>GN=ZWINT<br>PE=1 SV=2 -<br>[ZWINT_HUMAN]<br>Neutral amino acid transporter A | 7.58  | 1  | 2 | 2 | 2  | 0.370 | 0.602 | 0.806 | 0.269 | 5.36  | 7.58  | 2  | 2  | 277  | 31.3  | 5.15 |
| P43007 | OS=Homo sapiens<br>GN=SLC1A4<br>PE=1 SV=1 -<br>[SATT_HUMAN]<br>Origin recognition complex subunit 2                   | 4.14  | 1  | 1 | 2 | 3  | 0.553 | 0.318 | 0.323 | 0.272 | 8.51  | 4.14  | 3  | 3  | 532  | 55.7  | 6.25 |
| Q13416 | OS=Homo sapiens<br>GN=ORC2<br>PE=1 SV=2 -<br>[ORC2_HUMAN]<br>Matrix metalloproteinase-19                              | 1.21  | 1  | 1 | 1 | 5  | 0.331 | 0.276 | 0.321 | 0.275 | 7.62  | 1.21  | 2  | 5  | 577  | 65.9  | 6.51 |
| Q99542 | OS=Homo sapiens<br>GN=MMP19<br>PE=1 SV=1 -<br>[MMP19_HUMAN]<br>Zinc finger and SCAN domain-containing protein 2       | 4.53  | 1  | 1 | 1 | 2  | 0.884 | 0.672 | 1.696 | 0.275 | 6.41  | 4.53  | 1  | 2  | 508  | 57.3  | 7.59 |
| Q7Z7L9 | OS=Homo sapiens<br>GN=ZSCAN2<br>PE=2 SV=2 -<br>[ZSCA2_HUMAN]<br>GMP reductase 1                                       | 6.51  | 94 | 1 | 2 | 4  | 0.394 | 1.966 | 3.412 | 0.280 | 6.69  | 6.51  | 2  | 4  | 614  | 69.5  | 7.34 |
| P36959 | OS=Homo sapiens<br>GN=GMPR<br>PE=1 SV=1 -<br>[GMPR1_HUMAN]<br>Sex comb on midleg-like protein 4                       | 15.65 | 1  | 2 | 6 | 14 | 0.398 | 0.566 | 0.683 | 0.281 | 28.18 | 15.65 | 10 | 14 | 345  | 37.4  | 7.06 |
| Q8N228 | OS=Homo sapiens<br>GN=SCML4<br>PE=2 SV=2 -<br>[SCML4_HUMAN]<br>Periostin                                              | 4.83  | 1  | 1 | 1 | 2  | 3.049 | 0.176 | 0.250 | 0.284 | 5.32  | 4.83  | 1  | 2  | 414  | 45.0  | 9.74 |
| Q15063 | OS=Homo sapiens<br>GN=POSTN<br>PE=1 SV=2 -<br>[POSTN_HUMAN]<br>Zinc finger protein 445                                | 11.84 | 1  | 8 | 8 | 18 | 0.392 | 1.256 | 1.276 | 0.285 | 24.56 | 11.84 | 13 | 18 | 836  | 93.3  | 7.53 |
| P59923 | OS=Homo sapiens<br>GN=ZNF445<br>PE=2 SV=1 -<br>[ZN445_HUMAN]<br>]                                                     | 2.33  | 11 | 1 | 2 | 3  | 0.747 | 0.707 | 0.846 | 0.285 | 2.55  | 2.33  | 3  | 3  | 1031 | 118.9 | 9.39 |

|        |                                                                                                                                          |       |   |    |    |     |       |       |       |       |        |       |    |     |      |       |      |
|--------|------------------------------------------------------------------------------------------------------------------------------------------|-------|---|----|----|-----|-------|-------|-------|-------|--------|-------|----|-----|------|-------|------|
| Q9Y617 | Phosphoserine<br>aminotransferase OS=Homo<br>sapiens<br>GN=PSAT1<br>PE=1 SV=2 -<br>[SERC_HUMAN]                                          | 47.57 | 1 | 18 | 18 | 87  | 0.283 | 0.555 | 0.659 | 0.287 | 200.78 | 47.57 | 31 | 87  | 370  | 40.4  | 7.66 |
| Q6ZVL6 | UPF0606<br>protein<br>KIAA1549L<br>OS=Homo<br>sapiens<br>GN=KIAA1549L<br>PE=2 SV=2 -<br>[K154L_HUMAN<br>]                                | 0.54  | 1 | 1  | 1  | 1   | 1.816 | 0.091 | 0.159 | 0.289 | 0.00   | 0.54  | 1  | 1   | 1849 | 198.9 | 8.31 |
| Q8IWU6 | Extracellular<br>sulfatase Sulf-<br>1 OS=Homo<br>sapiens<br>GN=SULF1<br>PE=1 SV=1 -<br>[SULF1_HUMAN<br>]                                 | 9.07  | 1 | 9  | 9  | 22  | 0.235 | 1.161 | 3.680 | 0.292 | 38.36  | 9.07  | 14 | 22  | 871  | 101.0 | 9.09 |
| P02647 | Apolipoprotein<br>A-I OS=Homo<br>sapiens<br>GN=APOA1<br>PE=1 SV=1 -<br>[APOA1_HUMAN<br>]                                                 | 5.62  | 1 | 1  | 2  | 3   | 0.288 | 0.087 | 0.193 | 0.292 | 7.62   | 5.62  | 2  | 3   | 267  | 30.8  | 5.76 |
| Q16822 | Phosphoenolpy<br>ruvate<br>carboxykinase<br>[GTP],<br>mitochondrial<br>OS=Homo<br>sapiens<br>GN=PCK2<br>PE=1 SV=3 -<br>[PCKGM_HUMAN<br>] | 39.53 | 1 | 19 | 20 | 101 | 0.367 | 0.566 | 0.627 | 0.303 | 264.70 | 39.53 | 34 | 101 | 640  | 70.7  | 7.62 |
| P04264 | Keratin, type<br>II cytoskeletal<br>1 OS=Homo<br>sapiens<br>GN=KRT1<br>PE=1 SV=6 -<br>[K2C1_HUMAN]                                       | 42.86 | 1 | 22 | 28 | 127 | 0.956 | 2.561 | 0.514 | 0.305 | 315.28 | 42.86 | 46 | 127 | 644  | 66.0  | 8.12 |
| Q9UJV8 | Purine-rich<br>element-<br>binding protein<br>gamma<br>OS=Homo<br>sapiens<br>GN=PURG<br>PE=2 SV=1 -<br>[PURG_HUMAN]                      | 7.49  | 2 | 1  | 3  | 12  | 0.339 | 0.325 | 0.345 | 0.305 | 16.45  | 7.49  | 4  | 12  | 347  | 39.5  | 9.55 |
| Q6ZMR3 | L-lactate<br>dehydrogenase<br>A-like 6A<br>OS=Homo<br>sapiens<br>GN=LDHAL6A<br>PE=2 SV=1 -<br>[LDH6A_HUMAN<br>]                          | 7.83  | 1 | 1  | 4  | 82  | 0.279 | 0.218 | 0.209 | 0.307 | 162.19 | 7.83  | 6  | 82  | 332  | 36.5  | 6.99 |
| Q08629 | Testican-1<br>OS=Homo<br>sapiens<br>GN=SPOCK1<br>PE=1 SV=1 -<br>[TICN1_HUMAN<br>]                                                        | 2.96  | 1 | 1  | 1  | 2   | 0.127 | 0.491 | 0.651 | 0.307 | 0.00   | 2.96  | 2  | 2   | 439  | 49.1  | 6.10 |

|        |                                                                                                            |       |   |    |    |    |       |        |       |       |        |       |    |    |      |       |      |
|--------|------------------------------------------------------------------------------------------------------------|-------|---|----|----|----|-------|--------|-------|-------|--------|-------|----|----|------|-------|------|
| P07093 | Glia-derived nexin<br>OS=Homo sapiens<br>GN=SERPINE2<br>PE=1 SV=1 - [GDN_HUMAN]                            | 22.61 | 1 | 10 | 10 | 36 | 0.215 | 1.038  | 0.863 | 0.309 | 83.67  | 22.61 | 14 | 36 | 398  | 44.0  | 9.29 |
| Q16890 | Tumor protein D53<br>OS=Homo sapiens<br>GN=TPD52L1<br>PE=1 SV=1 - [TPD53_HUMAN]                            | 37.25 | 1 | 7  | 7  | 22 | 0.193 | 0.280  | 1.137 | 0.310 | 63.26  | 37.25 | 10 | 22 | 204  | 22.4  | 5.62 |
| Q96GN5 | Cell division cycle-associated 7-like protein<br>OS=Homo sapiens<br>GN=CDCA7L<br>PE=1 SV=2 - [CDA7L_HUMAN] | 2.64  | 1 | 1  | 1  | 4  | 1.599 | 0.278  | 0.781 | 0.310 | 7.80   | 2.64  | 1  | 4  | 454  | 52.2  | 5.74 |
| Q8NFX7 | Syntaxin-binding protein 6<br>OS=Homo sapiens<br>GN=STXBP6<br>PE=1 SV=2 - [STXB6_HUMAN]                    | 4.29  | 1 | 1  | 1  | 3  | 0.417 | 1.244  | 6.089 | 0.310 | 7.05   | 4.29  | 2  | 3  | 210  | 23.5  | 9.04 |
| Q9UPV0 | Centrosomal protein of 164 kDa<br>OS=Homo sapiens<br>GN=CEP164<br>PE=1 SV=3 - [CE164_HUMAN]                | 1.85  | 1 | 2  | 3  | 3  | 0.775 | 0.248  | 0.390 | 0.311 | 8.06   | 1.85  | 3  | 3  | 1460 | 164.2 | 5.36 |
| Q16799 | Reticulon-1<br>OS=Homo sapiens<br>GN=RTN1<br>PE=1 SV=1 - [RTN1_HUMAN]                                      | 15.72 | 1 | 8  | 8  | 43 | 0.519 | 0.461  | 2.187 | 0.312 | 117.51 | 15.72 | 13 | 43 | 776  | 83.6  | 4.69 |
| Q5TBA9 | Protein furry homolog<br>OS=Homo sapiens<br>GN=FRY<br>PE=1 SV=1 - [FRY_HUMAN]                              | 3.09  | 2 | 5  | 7  | 17 | 0.715 | 0.928  | 1.058 | 0.313 | 19.47  | 3.09  | 9  | 17 | 3013 | 338.7 | 5.99 |
| Q8N6Y2 | Leucine-rich repeat-containing protein 17<br>OS=Homo sapiens<br>GN=LRRCL7<br>PE=2 SV=1 - [LRC17_HUMAN]     | 7.26  | 1 | 3  | 3  | 10 | 0.159 | 24.723 | 4.984 | 0.314 | 27.70  | 7.26  | 5  | 10 | 441  | 51.8  | 8.24 |
| P22105 | Tenasin-X<br>OS=Homo sapiens<br>GN=TNXB<br>PE=1 SV=3 - [TENX_HUMAN]                                        | 8.37  | 2 | 22 | 22 | 42 | 0.601 | 0.648  | 0.637 | 0.315 | 94.56  | 8.37  | 32 | 42 | 4289 | 464.0 | 5.34 |
| A1L162 | Glutamate-rich protein 2<br>OS=Homo sapiens<br>GN=ERIC2<br>PE=2 SV=1 - [ERIC2_HUMAN]                       | 7.05  | 1 | 1  | 1  | 1  | 0.738 | 0.601  | 0.665 | 0.318 | 2.44   | 7.05  | 1  | 1  | 156  | 17.7  | 3.98 |

|        |                                                                                                                                                                         |      |   |   |   |   |       |       |       |       |      |      |   |   |     |      |       |
|--------|-------------------------------------------------------------------------------------------------------------------------------------------------------------------------|------|---|---|---|---|-------|-------|-------|-------|------|------|---|---|-----|------|-------|
| O75648 | Mitochondrial<br>tRNA-specific 2-<br>thiouridylase 1<br>OS=Homo<br>sapiens<br>GN=TRMU<br>PE=1 SV=2 -<br>[MTU1_HUMAN]                                                    | 3.09 | 1 | 1 | 1 | 1 | 0.456 | 0.597 | 0.411 | 0.320 | 0.00 | 3.09 | 1 | 1 | 421 | 47.7 | 8.03  |
| O75969 | A-kinase<br>anchored protein<br>3 OS=Homo<br>sapiens<br>GN=AKAP3<br>PE=1 SV=2 -<br>[AKAP3_HUMAN<br>]                                                                    | 1.17 | 1 | 1 | 1 | 1 | 0.496 | 0.698 | 0.903 | 0.320 | 2.23 | 1.17 | 1 | 1 | 853 | 94.7 | 6.18  |
| Q8N1L9 | Basic leucine<br>zipper<br>transcriptional<br>factor ATF-like<br>2 OS=Homo<br>sapiens<br>GN=BATF2<br>PE=1 SV=1 -<br>[BATF2_HUMAN<br>]                                   | 9.12 | 1 | 1 | 1 | 1 | 0.350 | 0.433 | 0.520 | 0.321 | 0.00 | 9.12 | 1 | 1 | 274 | 29.4 | 7.55  |
| Q9H9H5 | MAP6 domain-<br>containing<br>protein 1<br>OS=Homo<br>sapiens<br>GN=MAP6D1<br>PE=1 SV=1 -<br>[MAP6D1_HUMAN<br>]                                                         | 6.03 | 1 | 1 | 1 | 1 | 0.892 | 0.205 | 0.184 | 0.322 | 0.00 | 6.03 | 1 | 1 | 199 | 21.0 | 10.07 |
| Q8NHZ7 | Methyl-CpG-<br>binding domain<br>protein 3-like 2<br>OS=Homo<br>sapiens<br>GN=MBD3L2<br>PE=2 SV=3 -<br>[MBD3L2_HUMAN<br>]                                               | 8.17 | 1 | 1 | 1 | 2 | 0.306 | 1.272 | 0.977 | 0.324 | 2.04 | 8.17 | 1 | 2 | 208 | 23.0 | 11.53 |
| Q4AC99 | Probable<br>inactive 1-<br>aminocycloprop-<br>ane-1-<br>carboxylate<br>synthase-like<br>protein 2<br>OS=Homo<br>sapiens<br>GN=ACCSL<br>PE=2 SV=3 -<br>[1A1L2_HUMAN<br>] | 1.41 | 1 | 1 | 1 | 2 | 1.107 | 0.061 | 0.126 | 0.326 | 4.18 | 1.41 | 1 | 2 | 568 | 65.2 | 6.49  |
| Q14CS0 | UBX domain-<br>containing<br>protein 2B<br>OS=Homo<br>sapiens<br>GN=UBXN2B<br>PE=1 SV=1 -<br>[UBX2B_HUMAN<br>]                                                          | 2.42 | 1 | 1 | 1 | 1 | 0.778 | 1.025 | 0.993 | 0.328 | 2.19 | 2.42 | 1 | 1 | 331 | 37.1 | 5.64  |
| Q8N9W5 | Dynein<br>assembly factor<br>3, axonemal<br>OS=Homo<br>sapiens<br>GN=DNAAF3<br>PE=1 SV=3 -<br>[DAAF3_HUMAN<br>]                                                         | 2.03 | 1 | 1 | 1 | 1 | 1.555 | 1.131 | 1.203 | 0.330 | 1.98 | 2.03 | 1 | 1 | 541 | 59.4 | 5.90  |



|        |                                                                                                         |       |    |    |    |     |       |       |       |       |        |       |    |     |      |       |      |
|--------|---------------------------------------------------------------------------------------------------------|-------|----|----|----|-----|-------|-------|-------|-------|--------|-------|----|-----|------|-------|------|
| Q96MR9 | Zinc finger protein 560<br>OS=Homo sapiens<br>GN=ZNF560<br>PE=2 SV=2 - [ZNF560_HUMAN]                   | 2.41  | 94 | 1  | 2  | 3   | 0.081 | 0.208 | 0.331 | 2.39  | 2.41   | 2     | 3  | 790 | 91.1 | 8.69  |      |
| Q9NQX4 | Unconventional myosin-Vc<br>OS=Homo sapiens<br>GN=MYO5C<br>PE=1 SV=2 - [MYO5C_HUMAN]                    | 1.95  | 1  | 3  | 4  | 13  | 0.422 | 0.655 | 1.073 | 0.333 | 7.11   | 1.95  | 4  | 13  | 1742 | 202.7 | 7.71 |
| P08174 | Complement decay-accelerating factor<br>OS=Homo sapiens<br>GN=CD55<br>PE=1 SV=4 - [DAF_HUMAN]           | 16.27 | 1  | 7  | 7  | 19  | 0.632 | 1.293 | 0.885 | 0.334 | 51.35  | 16.27 | 10 | 19  | 381  | 41.4  | 7.59 |
| Q7Z614 | Sorting nexin-20<br>OS=Homo sapiens<br>GN=SNX20<br>PE=1 SV=1 - [SNX20_HUMAN]                            | 3.16  | 1  | 1  | 1  | 2   | 0.665 | 0.799 | 1.716 | 0.335 | 3.04   | 3.16  | 1  | 2   | 316  | 36.2  | 8.65 |
| Q9UFN0 | Protein NipSnap homolog 3A<br>OS=Homo sapiens<br>GN=NIPSNAP3A<br>PE=1 SV=2 - [NPS3A_HUMAN]              | 10.93 | 2  | 2  | 2  | 3   | 0.570 | 0.769 | 1.594 | 0.339 | 9.13   | 10.93 | 3  | 3   | 247  | 28.4  | 9.16 |
| Q5T0U0 | Coiled-coil domain-containing protein 122<br>OS=Homo sapiens<br>GN=CCDC122<br>PE=1 SV=1 - [CC122_HUMAN] | 6.23  | 1  | 2  | 2  | 6   | 0.641 | 0.353 | 0.329 | 0.342 | 9.10   | 6.23  | 3  | 6   | 273  | 32.2  | 7.01 |
| P35520 | Cystathionine beta-synthase<br>OS=Homo sapiens<br>GN=CBS PE=1 SV=2 - [CBS_HUMAN]                        | 21.78 | 1  | 13 | 13 | 44  | 0.613 | 0.411 | 0.536 | 0.342 | 83.26  | 21.78 | 22 | 44  | 551  | 60.5  | 6.65 |
| Q53QZ3 | Rho GTPase-activating protein 15<br>OS=Homo sapiens<br>GN=ARHGAP15<br>PE=1 SV=2 - [RHG15_HUMAN]         | 2.11  | 1  | 1  | 1  | 1   | 1.914 | 0.933 | 1.525 | 0.346 | 2.79   | 2.11  | 1  | 1   | 475  | 54.5  | 9.39 |
| O43175 | D-3-phosphoglycerate dehydrogenase<br>OS=Homo sapiens<br>GN=PHGDH<br>PE=1 SV=4 - [SERA_HUMAN]           | 39.96 | 1  | 20 | 20 | 170 | 0.409 | 0.705 | 0.607 | 0.348 | 454.63 | 39.96 | 37 | 170 | 533  | 56.6  | 6.71 |

|        |                                                                                                                                                                                                                                                                                                                                        |       |   |   |    |    |       |       |       |        |       |       |    |      |       |       |      |
|--------|----------------------------------------------------------------------------------------------------------------------------------------------------------------------------------------------------------------------------------------------------------------------------------------------------------------------------------------|-------|---|---|----|----|-------|-------|-------|--------|-------|-------|----|------|-------|-------|------|
| P13535 | Myosin-8<br>OS=Homo sapiens<br>GN=MYH8<br>PE=1 SV=3 -<br>[MYH8_HUMAN]                                                                                                                                                                                                                                                                  | 4.70  | 1 | 2 | 10 | 85 | 1.481 | 1.607 | 0.349 | 156.65 | 4.70  | 12    | 85 | 1937 | 222.6 | 5.74  |      |
| Q9BZZ2 | Sialoadhesin<br>OS=Homo sapiens<br>GN=[GLEC1<br>PE=1 SV=2 -<br>[SN_HUMAN]<br>Cellular retinoic<br>acid-binding<br>protein 2<br>OS=Homo sapiens<br>GN=CRABP2<br>PE=1 SV=2 -<br>[RABP2_HUMAN<br>]<br>Acid<br>sphingomyelina<br>se-like<br>phosphodiester<br>ase 3b<br>OS=Homo sapiens<br>GN=SMPDL3B<br>PE=2 SV=2 -<br>[ASM3B_HUMAN<br>N] | 1.23  | 1 | 1 | 2  | 3  | 0.700 | 1.111 | 0.613 | 0.349  | 6.76  | 1.23  | 3  | 3    | 1709  | 182.5 | 6.62 |
| P29373 | Acid<br>sphingomyelina<br>se-like<br>phosphodiester<br>ase 3b<br>OS=Homo sapiens<br>GN=SMPDL3B<br>PE=2 SV=2 -<br>[ASM3B_HUMAN<br>N]                                                                                                                                                                                                    | 53.62 | 1 | 6 | 6  | 22 | 0.226 | 1.713 | 1.300 | 0.350  | 41.51 | 53.62 | 11 | 22   | 138   | 15.7  | 5.40 |
| Q92485 | Interleukin-1<br>alpha<br>OS=Homo sapiens<br>GN=IL1A PE=1<br>SV=1 -<br>[IL1A_HUMAN]                                                                                                                                                                                                                                                    | 1.32  | 1 | 1 | 1  | 1  | 0.655 | 0.931 | 0.734 | 0.351  | 2.33  | 1.32  | 1  | 1    | 455   | 50.8  | 5.64 |
| P01583 | Large neutral<br>amino acids<br>transporter<br>small subunit 1<br>OS=Homo sapiens<br>GN=SLC7A5<br>PE=1 SV=2 -<br>[LAT1_HUMAN]                                                                                                                                                                                                          | 4.06  | 1 | 1 | 1  | 1  | 0.465 | 0.509 | 0.570 | 0.351  | 0.00  | 4.06  | 1  | 1    | 271   | 30.6  | 5.20 |
| Q01650 | EMI domain-<br>containing<br>protein 1<br>OS=Homo sapiens<br>GN=EMID1<br>PE=2 SV=1 -<br>[EMID1_HUMAN<br>]<br>Cytochrome<br>P450 1B1<br>OS=Homo sapiens<br>GN=CYP1B1<br>PE=1 SV=2 -<br>[CP1B1_HUMAN<br>]<br>WW domain<br>binding protein<br>1-like<br>OS=Homo sapiens<br>GN=WBP1L<br>PE=2 SV=2 -<br>[WBP1L_HUMAN<br>N]                  | 6.31  | 1 | 2 | 2  | 14 | 0.271 | 0.287 | 0.460 | 0.352  | 53.07 | 6.31  | 4  | 14   | 507   | 55.0  | 7.72 |
| Q96A84 | EMI domain-<br>containing<br>protein 1<br>OS=Homo sapiens<br>GN=EMID1<br>PE=2 SV=1 -<br>[EMID1_HUMAN<br>]<br>Cytochrome<br>P450 1B1<br>OS=Homo sapiens<br>GN=CYP1B1<br>PE=1 SV=2 -<br>[CP1B1_HUMAN<br>]<br>WW domain<br>binding protein<br>1-like<br>OS=Homo sapiens<br>GN=WBP1L<br>PE=2 SV=2 -<br>[WBP1L_HUMAN<br>N]                  | 6.80  | 1 | 1 | 1  | 2  | 0.356 | 0.612 | 0.351 | 0.353  | 4.82  | 6.80  | 1  | 2    | 441   | 45.3  | 9.10 |
| Q16678 | WW domain<br>binding protein<br>1-like<br>OS=Homo sapiens<br>GN=WBP1L<br>PE=2 SV=2 -<br>[WBP1L_HUMAN<br>N]                                                                                                                                                                                                                             | 6.26  | 1 | 3 | 3  | 16 | 0.474 | 0.162 | 0.345 | 0.354  | 43.05 | 6.26  | 6  | 16   | 543   | 60.8  | 8.98 |
| Q9NX94 | WW domain<br>binding protein<br>1-like<br>OS=Homo sapiens<br>GN=WBP1L<br>PE=2 SV=2 -<br>[WBP1L_HUMAN<br>N]                                                                                                                                                                                                                             | 7.31  | 1 | 2 | 2  | 2  | 0.719 | 1.362 | 2.292 | 0.356  | 5.83  | 7.31  | 2  | 2    | 342   | 37.8  | 5.19 |

|        |                                                                                                                              |       |   |    |    |     |       |       |       |       |         |       |    |     |      |       |      |
|--------|------------------------------------------------------------------------------------------------------------------------------|-------|---|----|----|-----|-------|-------|-------|-------|---------|-------|----|-----|------|-------|------|
| Q99728 | BRCA1-associated RING domain protein 1<br>OS=Homo sapiens<br>GN=BARD1<br>PE=1 SV=2 - [BARD1_HUMAN]                           | 1.80  | 1 | 1  | 1  | 1   | 0.738 | 1.021 | 1.155 | 0.358 | 2.31    | 1.80  | 1  | 1   | 777  | 86.6  | 8.72 |
| Q9UI08 | Ena/VASP-like protein<br>OS=Homo sapiens<br>GN=EVL<br>PE=1 SV=2 - [EVL_HUMAN]                                                | 5.05  | 1 | 2  | 2  | 4   | 0.666 | 0.571 | 0.799 | 0.358 | 4.61    | 5.05  | 3  | 4   | 416  | 44.6  | 8.84 |
| O95833 | Chloride intracellular channel protein 3<br>OS=Homo sapiens<br>GN=CLIC3<br>PE=1 SV=2 - [CLIC3_HUMAN]                         | 42.80 | 1 | 9  | 10 | 23  | 0.452 | 0.464 | 0.730 | 0.364 | 45.57   | 42.80 | 14 | 23  | 236  | 26.6  | 6.43 |
| Q8WWQ2 | Inactive heparanase-2<br>OS=Homo sapiens<br>GN=HPSE2<br>PE=1 SV=3 - [HPSE2_HUMAN]                                            | 2.36  | 1 | 1  | 1  | 2   | 0.607 | 1.087 | 1.878 | 0.365 | 0.00    | 2.36  | 1  | 2   | 592  | 66.6  | 9.94 |
| Q99674 | Cell growth regulator with EF hand domain protein 1<br>OS=Homo sapiens<br>GN=CGREF1<br>PE=2 SV=2 - [CGRE1_HUMAN]             | 5.32  | 2 | 1  | 2  | 4   | 0.330 | 0.776 | 0.885 | 0.367 | 9.32    | 5.32  | 2  | 4   | 301  | 31.9  | 4.42 |
| Q6ZRI0 | Otogelin<br>OS=Homo sapiens<br>GN=OTOG<br>PE=1 SV=3 - [OTOG_HUMAN]                                                           | 0.41  | 1 | 2  | 2  | 2   | 0.416 | 0.573 | 0.638 | 0.368 | 4.65    | 0.41  | 2  | 2   | 2925 | 314.6 | 5.91 |
| P02461 | Collagen alpha-1(III) chain<br>OS=Homo sapiens<br>GN=COL3A1<br>PE=1 SV=4 - [CO3A1_HUMAN]                                     | 47.61 | 1 | 50 | 52 | 411 | 0.325 | 0.736 | 0.737 | 0.368 | 1045.31 | 47.61 | 86 | 411 | 1466 | 138.5 | 6.61 |
| P22557 | 5-aminolevulinic acid synthase, erythroid-specific, mitochondrial<br>OS=Homo sapiens<br>GN=ALAS2<br>PE=1 SV=2 - [HEM0_HUMAN] | 2.90  | 1 | 1  | 2  | 2   | 1.314 | 0.201 | 0.250 | 0.368 | 2.31    | 2.90  | 2  | 2   | 587  | 64.6  | 8.12 |
| O75154 | Rab11 family-interacting protein 3<br>OS=Homo sapiens<br>GN=RAB11FIP3<br>PE=1 SV=1 - [RFIP3_HUMAN]                           | 4.63  | 1 | 1  | 2  | 3   | 1.904 | 1.422 | 2.253 | 0.369 | 3.82    | 4.63  | 2  | 3   | 756  | 82.4  | 4.51 |

|        |                                                                                                                   |       |    |    |    |    |       |       |       |       |        |       |    |    |      |       |      |
|--------|-------------------------------------------------------------------------------------------------------------------|-------|----|----|----|----|-------|-------|-------|-------|--------|-------|----|----|------|-------|------|
| O15083 | ERC protein 2<br>OS=Homo sapiens<br>GN=ERC2<br>PE=1 SV=3 - [ERC2_HUMAN]                                           | 11.18 | 1  | 2  | 14 | 66 | 0.418 | 0.651 | 0.615 | 0.369 | 114.48 | 11.18 | 21 | 66 | 957  | 110.5 | 6.99 |
| Q9Y446 | Plakophilin-3<br>OS=Homo sapiens<br>GN=PKP3<br>PE=1 SV=1 - [PKP3_HUMAN]                                           | 2.01  | 1  | 1  | 1  | 2  | 0.457 | 0.379 |       | 0.370 | 0.00   | 2.01  | 1  | 2  | 797  | 87.0  | 9.32 |
| Q96MR6 | Cilia- and flagella-associated protein 57<br>OS=Homo sapiens<br>GN=CFAP57<br>PE=1 SV=3 - [CFA57_HUMAN]            | 0.56  | 1  | 1  | 1  | 2  | 0.598 | 1.139 | 1.582 | 0.371 | 4.93   | 0.56  | 1  | 2  | 1250 | 144.9 | 5.80 |
| Q3C1V8 | Brain-specific homeobox protein homolog<br>OS=Homo sapiens<br>GN=BSX PE=2 SV=2 - [BSH_HUMAN]                      | 15.45 | 1  | 2  | 2  | 3  | 0.767 | 0.709 | 1.005 | 0.371 | 6.36   | 15.45 | 2  | 3  | 233  | 25.9  | 7.50 |
| P54687 | Branched-chain-amino-acid aminotransferase, cytosolic<br>OS=Homo sapiens<br>GN=BCAT1<br>PE=1 SV=3 - [BCAT1_HUMAN] | 25.91 | 1  | 9  | 9  | 25 | 0.362 | 0.749 | 0.945 | 0.373 | 63.79  | 25.91 | 12 | 25 | 386  | 42.9  | 5.30 |
| P07585 | Decorin<br>OS=Homo sapiens<br>GN=DCN PE=1 SV=1 - [PGS2_HUMAN]                                                     | 33.43 | 1  | 12 | 13 | 97 | 0.428 | 0.582 | 0.626 | 0.375 | 228.03 | 33.43 | 24 | 97 | 359  | 39.7  | 8.54 |
| Q8IYE0 | Coiled-coil domain-containing protein 146<br>OS=Homo sapiens<br>GN=CCDC146<br>PE=2 SV=2 - [CC146_HUMAN]           | 3.56  | 1  | 2  | 4  | 6  | 0.468 | 0.747 | 0.886 | 0.375 | 9.70   | 3.56  | 4  | 6  | 955  | 112.7 | 8.48 |
| Q16853 | Membrane primary amine oxidase<br>OS=Homo sapiens<br>GN=AOC3<br>PE=1 SV=3 - [AOC3_HUMAN]                          | 5.90  | 2  | 5  | 5  | 17 | 0.145 | 0.310 | 0.870 | 0.376 | 41.82  | 5.90  | 10 | 17 | 763  | 84.6  | 6.52 |
| P13645 | Keratin, type I cytoskeletal 10<br>OS=Homo sapiens<br>GN=KRT10<br>PE=1 SV=6 - [K1C10_HUMAN]                       | 38.70 | 10 | 19 | 25 | 98 | 0.869 | 2.779 | 0.809 | 0.378 | 222.37 | 38.70 | 34 | 98 | 584  | 58.8  | 5.21 |

|        |                                                                                                                                       |       |   |    |    |     |       |       |       |       |        |       |    |     |     |       |      |
|--------|---------------------------------------------------------------------------------------------------------------------------------------|-------|---|----|----|-----|-------|-------|-------|-------|--------|-------|----|-----|-----|-------|------|
| Q9UKS7 | Zinc finger protein Helios<br>OS=Homo sapiens<br>GN=IKZF2<br>PE=1 SV=2 - [IKZF2_HUMAN]                                                | 1.90  | 1 | 1  | 1  | 1   | 0.434 | 0.729 | 0.733 | 0.379 | 0.00   | 1.90  | 1  | 1   | 526 | 59.5  | 6.77 |
| Q76M96 | Coiled-coil domain-containing protein 80<br>OS=Homo sapiens<br>GN=CCDC80<br>PE=1 SV=1 - [CCDC80_HUMAN]                                | 27.79 | 1 | 17 | 17 | 54  | 0.309 | 0.860 | 0.705 | 0.381 | 128.16 | 27.79 | 29 | 54  | 950 | 108.1 | 9.72 |
| A6NCE7 | Microtubule-associated proteins 1A/1B light chain 3 beta 2<br>OS=Homo sapiens<br>GN=MAP1LC3B<br>2 PE=2 SV=1 - [MP3B2_HUMAN]           | 24.00 | 2 | 1  | 4  | 9   | 0.408 | 0.659 | 1.346 | 0.383 | 10.97  | 24.00 | 7  | 9   | 125 | 14.6  | 8.68 |
| Q15562 | Transcriptional enhancer factor TEF-4<br>OS=Homo sapiens<br>GN=TEAD2<br>PE=1 SV=2 - [TEAD2_HUMAN]                                     | 8.50  | 4 | 3  | 3  | 8   | 0.443 | 0.739 | 0.688 | 0.384 | 6.29   | 8.50  | 3  | 8   | 447 | 49.2  | 6.47 |
| P51911 | Calponin-1<br>OS=Homo sapiens<br>GN=CNN1<br>PE=1 SV=2 - [CNN1_HUMAN]                                                                  | 63.97 | 1 | 19 | 23 | 225 | 0.577 | 1.244 | 2.011 | 0.385 | 504.51 | 63.97 | 35 | 225 | 297 | 33.1  | 9.07 |
| Q9BUZ4 | TNF receptor-associated factor 4<br>OS=Homo sapiens<br>GN=TRAF4<br>PE=1 SV=1 - [TRAF4_HUMAN]                                          | 1.49  | 1 | 1  | 1  | 11  | 0.569 | 0.819 | 2.010 | 0.386 | 22.92  | 1.49  | 2  | 11  | 470 | 53.5  | 8.15 |
| Q8NHP8 | Putative phospholipase B-like 2<br>OS=Homo sapiens<br>GN=PLBD2<br>PE=1 SV=2 - [PLBL2_HUMAN]                                           | 20.20 | 1 | 10 | 10 | 37  | 0.507 | 1.188 | 1.077 | 0.388 | 65.39  | 20.20 | 17 | 37  | 589 | 65.4  | 6.80 |
| Q14123 | Calcium/calmodulin-dependent 3',5'-cyclic nucleotide phosphodiesterase 1C<br>OS=Homo sapiens<br>GN=PDE1C<br>PE=1 SV=1 - [PDE1C_HUMAN] | 4.51  | 1 | 2  | 2  | 2   | 1.191 | 0.476 | 0.765 | 0.389 | 2.74   | 4.51  | 2  | 2   | 709 | 80.7  | 8.82 |

|        |                                                                                                                            |       |   |    |    |    |       |       |       |       |        |       |    |    |      |       |      |
|--------|----------------------------------------------------------------------------------------------------------------------------|-------|---|----|----|----|-------|-------|-------|-------|--------|-------|----|----|------|-------|------|
| Q16611 | Bcl-2 homologous antagonist/killer OS=Homo sapiens<br>GN=BAK1<br>PE=1 SV=1 - [BAK_HUMAN]                                   | 21.33 | 1 | 2  | 2  | 7  | 1.225 | 0.809 | 0.835 | 0.390 | 16.05  | 21.33 | 3  | 7  | 211  | 23.4  | 6.01 |
| P35555 | Fibrillin-1 OS=Homo sapiens<br>GN=FBNI<br>PE=1 SV=3 - [FBNI_HUMAN]                                                         | 5.89  | 1 | 15 | 17 | 52 | 0.393 | 0.586 | 0.560 | 0.392 | 110.11 | 5.89  | 25 | 52 | 2871 | 312.0 | 4.93 |
| Q9P2N4 | A disintegrin and metalloproteinase with thrombospondin motifs 9 OS=Homo sapiens<br>GN=ADAMTS9<br>PE=1 SV=4 - [ATS9_HUMAN] | 0.88  | 1 | 1  | 1  | 1  | 1.918 | 0.314 | 0.646 | 0.392 | 2.46   | 0.88  | 1  | 1  | 1935 | 216.4 | 7.77 |
| P51805 | Plexin-A3 OS=Homo sapiens<br>GN=PLXNA3<br>PE=1 SV=2 - [PLXA3_HUMAN]                                                        | 3.42  | 1 | 2  | 7  | 20 | 0.725 | 0.683 | 1.181 | 0.393 | 38.13  | 3.42  | 12 | 20 | 1871 | 207.6 | 7.31 |
| Q8NGX8 | Olfactory receptor 6Y1 OS=Homo sapiens<br>GN=OR6Y1<br>PE=2 SV=1 - [OR6Y1_HUMAN]                                            | 2.77  | 1 | 1  | 1  | 1  |       | 0.431 |       | 0.394 | 3.29   | 2.77  | 1  | 1  | 325  | 36.6  | 8.06 |
| P21439 | Multidrug resistance protein 3 OS=Homo sapiens<br>GN=ABCB4<br>PE=1 SV=2 - [MDR3_HUMAN]                                     | 0.62  | 1 | 1  | 1  | 2  | 2.140 | 0.762 | 0.903 | 0.395 | 4.73   | 0.62  | 1  | 2  | 1286 | 141.4 | 8.48 |
| Q86VW0 | SEC14 domain and spectrin repeat-containing protein 1 OS=Homo sapiens<br>GN=SESTD1<br>PE=1 SV=2 - [SESD1_HUMAN]            | 2.73  | 1 | 2  | 2  | 3  | 1.335 | 0.107 | 0.208 | 0.396 | 4.61   | 2.73  | 2  | 3  | 696  | 79.3  | 5.10 |
| P43403 | Tyrosine-protein kinase ZAP-70 OS=Homo sapiens<br>GN=ZAP70<br>PE=1 SV=1 - [ZAP70_HUMAN]                                    | 6.95  | 1 | 2  | 2  | 2  | 0.529 | 1.374 | 2.838 | 0.398 | 5.51   | 6.95  | 2  | 2  | 619  | 69.8  | 7.69 |
| Q9BT73 | Proteasome assembly chaperone 3 OS=Homo sapiens<br>GN=PSMG3<br>PE=1 SV=1 - [PSMG3_HUMAN]                                   | 12.30 | 1 | 1  | 1  | 1  | 2.507 | 2.020 |       | 0.398 | 5.03   | 12.30 | 1  | 1  | 122  | 13.1  | 7.88 |

|        |                                                                                                                 |       |   |    |    |     |       |       |       |       |        |       |    |     |      |       |      |
|--------|-----------------------------------------------------------------------------------------------------------------|-------|---|----|----|-----|-------|-------|-------|-------|--------|-------|----|-----|------|-------|------|
| Q13449 | Limbic system-associated membrane protein<br>OS=Homo sapiens<br>GN=LSAMP<br>PE=1 SV=2 - [LSAMP_HUMAN]           | 13.31 | 1 | 4  | 4  | 11  | 0.544 | 1.513 | 0.811 | 0.398 | 29.33  | 13.31 | 6  | 11  | 338  | 37.4  | 6.98 |
| Q6X4U4 | Sclerostin domain-containing protein 1<br>OS=Homo sapiens<br>GN=SOSTDC1<br>PE=1 SV=2 - [SOSTDC1_HUMAN]          | 6.80  | 1 | 1  | 1  | 1   | 0.706 | 1.366 | 0.983 | 0.400 | 2.17   | 6.80  | 1  | 1   | 206  | 23.3  | 9.74 |
| Q9UPN9 | E3 ubiquitin-protein ligase TRIM33<br>OS=Homo sapiens<br>GN=TRIM33<br>PE=1 SV=3 - [TRIM33_HUMAN]                | 0.89  | 1 | 1  | 1  | 1   | 1.468 |       |       | 0.404 | 0.00   | 0.89  | 1  | 1   | 1127 | 122.5 | 6.67 |
| P05997 | Collagen alpha-2(V) chain<br>OS=Homo sapiens<br>GN=COL5A2<br>PE=1 SV=3 - [COL5A2_HUMAN]                         | 21.28 | 1 | 20 | 22 | 83  | 0.759 | 0.724 | 0.667 | 0.405 | 191.54 | 21.28 | 37 | 83  | 1499 | 144.8 | 6.46 |
| P21291 | Cysteine and glycine-rich protein 1<br>OS=Homo sapiens<br>GN=CSRP1<br>PE=1 SV=3 - [CSRP1_HUMAN]                 | 54.40 | 1 | 11 | 11 | 140 | 1.508 | 1.222 | 1.789 | 0.407 | 424.48 | 54.40 | 20 | 140 | 193  | 20.6  | 8.57 |
| Q96CG8 | Collagen triple helix repeat-containing protein 1<br>OS=Homo sapiens<br>GN=CTHRC1<br>PE=1 SV=1 - [CTHRC1_HUMAN] | 32.10 | 1 | 6  | 6  | 27  | 0.521 | 0.688 | 0.354 | 0.407 | 79.14  | 32.10 | 10 | 27  | 243  | 26.2  | 7.99 |
| Q08431 | Lactadherin<br>OS=Homo sapiens<br>GN=MFG8<br>PE=1 SV=2 - [MFG8_HUMAN]                                           | 18.60 | 1 | 7  | 7  | 18  | 0.563 | 0.861 | 1.793 | 0.409 | 40.39  | 18.60 | 10 | 18  | 387  | 43.1  | 8.15 |
| Q9UNW1 | Multiple inositol polyphosphate phosphatase 1<br>OS=Homo sapiens<br>GN=MINPP1<br>PE=1 SV=1 - [MINPP1_HUMAN]     | 10.06 | 1 | 5  | 5  | 11  | 0.637 | 0.412 | 0.510 | 0.410 | 32.55  | 10.06 | 7  | 11  | 487  | 55.0  | 7.81 |
| O75051 | Plexin-A2<br>OS=Homo sapiens<br>GN=PLXA2<br>PE=1 SV=4 - [PLXA2_HUMAN]                                           | 3.59  | 1 | 1  | 7  | 21  | 0.352 | 0.966 | 0.644 | 0.410 | 34.42  | 3.59  | 11 | 21  | 1894 | 211.0 | 6.48 |

|        |                                                                                                           |       |   |     |     |     |       |       |       |       |         |       |     |     |      |       |      |
|--------|-----------------------------------------------------------------------------------------------------------|-------|---|-----|-----|-----|-------|-------|-------|-------|---------|-------|-----|-----|------|-------|------|
| P02452 | Collagen alpha-1(I) chain<br>OS=Homo sapiens<br>GN=COL1A1<br>PE=1 SV=5 - [CO1A1_HUMAN]                    | 59.22 | 2 | 59  | 62  | 389 | 0.325 | 0.566 | 0.611 | 0.411 | 1027.67 | 59.22 | 103 | 389 | 1464 | 138.9 | 5.80 |
| Q9H788 | SH2 domain-containing protein 4A<br>OS=Homo sapiens<br>GN=SH2D4A<br>PE=1 SV=1 - [SH24A_HUMAN]             | 27.09 | 1 | 13  | 13  | 39  | 0.585 | 0.552 | 0.783 | 0.411 | 84.89   | 27.09 | 17  | 39  | 454  | 52.7  | 8.06 |
| Q8N6D5 | Ankyrin repeat domain-containing protein 29<br>OS=Homo sapiens<br>GN=ANKRD29<br>PE=2 SV=2 - [ANR29_HUMAN] | 2.99  | 1 | 1   | 1   | 2   | 1.054 | 0.127 | 0.285 | 0.411 | 2.34    | 2.99  | 1   | 2   | 301  | 32.4  | 9.41 |
| P02792 | Ferritin light chain<br>OS=Homo sapiens<br>GN=FTL PE=1 SV=2 - [FRIL_HUMAN]                                | 38.29 | 1 | 6   | 7   | 32  | 0.487 | 0.684 | 0.555 | 0.412 | 84.02   | 38.29 | 11  | 32  | 175  | 20.0  | 5.78 |
| Q8IVF2 | Protein AHNAK2<br>OS=Homo sapiens<br>GN=AHNAK2<br>PE=1 SV=2 - [AHNK2_HUMAN]                               | 46.66 | 1 | 117 | 124 | 424 | 0.921 | 1.908 | 1.567 | 0.412 | 1016.23 | 46.66 | 200 | 424 | 5795 | 616.2 | 5.36 |
| O60602 | Toll-like receptor 5<br>OS=Homo sapiens<br>GN=TLR5 PE=1 SV=4 - [TLR5_HUMAN]                               | 0.93  | 1 | 1   | 1   | 2   | 3.942 | 1.075 | 1.043 | 0.412 | 2.15    | 0.93  | 1   | 2   | 858  | 97.8  | 6.68 |
| Q9BV73 | Centrosome-associated protein CEP250<br>OS=Homo sapiens<br>GN=CEP250<br>PE=1 SV=2 - [CP250_HUMAN]         | 1.47  | 1 | 1   | 5   | 16  | 1.139 | 0.985 | 0.650 | 0.413 | 27.51   | 1.47  | 6   | 16  | 2442 | 281.0 | 5.02 |
| O15460 | Prolyl 4-hydroxylase subunit alpha-2<br>OS=Homo sapiens<br>GN=P4HA2<br>PE=1 SV=1 - [P4HA2_HUMAN]          | 43.18 | 1 | 23  | 23  | 131 | 0.477 | 0.685 | 0.709 | 0.414 | 348.29  | 43.18 | 38  | 131 | 535  | 60.9  | 5.71 |
| P43308 | Translocon-associated protein subunit beta<br>OS=Homo sapiens<br>GN=SSR2<br>PE=1 SV=1 - [SSRB_HUMAN]      | 3.28  | 1 | 1   | 1   | 1   | 0.601 | 0.649 | 0.240 | 0.414 | 1.92    | 3.28  | 1   | 1   | 183  | 20.1  | 8.35 |



|        |                                                                                                              |       |   |    |    |     |       |       |       |       |        |       |    |     |      |       |      |
|--------|--------------------------------------------------------------------------------------------------------------|-------|---|----|----|-----|-------|-------|-------|-------|--------|-------|----|-----|------|-------|------|
| O75781 | Paralemin-1<br>OS=Homo sapiens<br>GN=PALM<br>PE=1 SV=2 - [PALM_HUMAN]                                        | 35.66 | 1 | 12 | 13 | 62  | 0.350 | 0.579 | 0.536 | 0.415 | 151.75 | 35.66 | 20 | 62  | 387  | 42.1  | 5.00 |
| P35527 | Keratin, type I cytoskeletal 9<br>OS=Homo sapiens<br>GN=KRT9<br>PE=1 SV=3 - [K1C9_HUMAN]                     | 23.60 | 2 | 13 | 15 | 49  | 0.950 | 2.470 | 0.395 | 0.415 | 97.92  | 23.60 | 21 | 49  | 623  | 62.0  | 5.24 |
| P41250 | Glycine--tRNA ligase<br>OS=Homo sapiens<br>GN=GARS<br>PE=1 SV=3 - [SYG_HUMAN]                                | 46.14 | 1 | 33 | 34 | 127 | 0.533 | 0.612 | 0.730 | 0.416 | 275.02 | 46.14 | 55 | 127 | 739  | 83.1  | 7.03 |
| Q9UGJ0 | 5'-AMP-activated protein kinase subunit gamma-2<br>OS=Homo sapiens<br>GN=PRKAG2<br>PE=1 SV=1 - [AAKG2_HUMAN] | 4.39  | 1 | 1  | 3  | 8   | 0.693 | 0.609 | 0.991 | 0.417 | 14.21  | 4.39  | 6  | 8   | 569  | 63.0  | 9.35 |
| P19320 | Vascular cell adhesion protein 1<br>OS=Homo sapiens<br>GN=VCAM1<br>PE=1 SV=1 - [VCAM1_HUMAN]                 | 35.99 | 1 | 26 | 27 | 121 | 1.279 | 0.321 | 0.239 | 0.418 | 288.99 | 35.99 | 47 | 121 | 739  | 81.2  | 5.22 |
| O43592 | Exportin-T<br>OS=Homo sapiens<br>GN=XPOT<br>PE=1 SV=2 - [XPOT_HUMAN]                                         | 10.60 | 1 | 9  | 9  | 27  | 0.366 | 0.496 | 0.462 | 0.418 | 55.89  | 10.60 | 16 | 27  | 962  | 109.9 | 5.39 |
| P78330 | Phosphoserine phosphatase<br>OS=Homo sapiens<br>GN=PSPH<br>PE=1 SV=2 - [SERB_HUMAN]                          | 20.00 | 1 | 4  | 4  | 12  | 0.708 | 1.179 | 1.366 | 0.419 | 26.37  | 20.00 | 8  | 12  | 225  | 25.0  | 5.69 |
| Q96RS0 | Trimethylguanosine synthase<br>OS=Homo sapiens<br>GN=TGS1<br>PE=1 SV=3 - [TGS1_HUMAN]                        | 0.70  | 1 | 1  | 1  | 4   | 0.414 | 2.079 | 3.087 | 0.419 | 8.19   | 0.70  | 1  | 4   | 853  | 96.6  | 4.94 |
| Q5K651 | Sterile alpha motif domain-containing protein 9<br>OS=Homo sapiens<br>GN=SAMD9<br>PE=1 SV=1 - [SAMD9_HUMAN]  | 2.08  | 1 | 3  | 4  | 6   | 1.923 | 1.407 | 0.873 | 0.420 | 18.45  | 2.08  | 4  | 6   | 1589 | 184.2 | 7.83 |

|        |                                                                                                                |       |   |    |    |     |       |       |       |       |         |       |     |     |      |       |      |
|--------|----------------------------------------------------------------------------------------------------------------|-------|---|----|----|-----|-------|-------|-------|-------|---------|-------|-----|-----|------|-------|------|
| P02751 | Fibronectin<br>OS=Homo sapiens<br>GN=FN1 PE=1 SV=4 -<br>[FINC_HUMAN]                                           | 34.07 | 1 | 60 | 60 | 428 | 0.267 | 0.799 | 1.020 | 0.420 | 1115.25 | 34.07 | 104 | 428 | 2386 | 262.5 | 5.71 |
| P49918 | Cyclin-dependent<br>kinase inhibitor<br>1C OS=Homo sapiens<br>GN=CDKN1C PE=1 SV=1 -<br>[CDN1C_HUMAN]           | 5.06  | 1 | 1  | 1  | 1   | 2.232 | 0.109 | 0.458 | 0.421 | 2.57    | 5.06  | 1   | 1   | 316  | 32.2  | 5.52 |
| O14880 | Microsomal<br>glutathione S-transferase 3<br>OS=Homo sapiens<br>GN=MGST3 PE=1 SV=1 -<br>[MGST3_HUMAN]          | 25.00 | 1 | 2  | 2  | 8   | 0.496 | 0.260 | 0.288 | 0.422 | 27.28   | 25.00 | 3   | 8   | 152  | 16.5  | 9.38 |
| Q6IMI6 | Sulfotransferase 1C3<br>OS=Homo sapiens<br>GN=SULT1C3 PE=1 SV=1 -<br>[ST1C3_HUMAN]                             | 5.59  | 1 | 1  | 1  | 1   | 1.120 | 0.688 | 1.043 | 0.422 | 0.00    | 5.59  | 1   | 1   | 304  | 35.9  | 6.92 |
| Q6ZNU1 | Neurobeachin-like protein 2<br>OS=Homo sapiens<br>GN=NBEAL2 PE=1 SV=2 -<br>[NBEAL2_HUMAN]                      | 0.73  | 1 | 1  | 2  | 3   | 0.824 | 1.509 | 1.691 | 0.423 | 2.39    | 0.73  | 2   | 3   | 2754 | 302.3 | 6.38 |
| P35237 | Serpin B6<br>OS=Homo sapiens<br>GN=SERPINB6 PE=1 SV=3 -<br>[SPB6_HUMAN]                                        | 51.33 | 1 | 18 | 19 | 116 | 0.857 | 1.124 | 1.019 | 0.423 | 224.84  | 51.33 | 32  | 116 | 376  | 42.6  | 5.27 |
| Q96A00 | Protein phosphatase 1<br>regulatory subunit 14A<br>OS=Homo sapiens<br>GN=PPP1R14A PE=1 SV=1 -<br>[PP14A_HUMAN] | 11.56 | 1 | 1  | 2  | 8   | 0.471 | 5.514 | 1.902 | 0.423 | 14.75   | 11.56 | 3   | 8   | 147  | 16.7  | 9.38 |
| A0PK00 | Transmembrane protein 120B<br>OS=Homo sapiens<br>GN=TMEM120B PE=2 SV=1 -<br>[T120B_HUMAN]                      | 6.78  | 1 | 1  | 2  | 11  | 0.670 | 1.195 | 0.857 | 0.424 | 48.87   | 6.78  | 3   | 11  | 339  | 40.2  | 8.90 |
| Q99470 | Stromal cell-derived factor 2<br>OS=Homo sapiens<br>GN=SDF2 PE=1 SV=2 -<br>[SDF2_HUMAN]                        | 24.64 | 1 | 3  | 3  | 12  | 1.896 | 0.880 | 0.778 | 0.424 | 24.27   | 24.64 | 5   | 12  | 211  | 23.0  | 7.33 |
| P36871 | Phosphoglucosylase-1<br>OS=Homo sapiens<br>GN=PGM1 PE=1 SV=3 -<br>[PGM1_HUMAN]                                 | 57.30 | 1 | 32 | 32 | 280 | 0.747 | 0.837 | 1.081 | 0.426 | 740.98  | 57.30 | 55  | 280 | 562  | 61.4  | 6.76 |

|        |                                                                                                        |       |   |    |    |     |       |       |       |       |        |       |    |     |      |       |      |
|--------|--------------------------------------------------------------------------------------------------------|-------|---|----|----|-----|-------|-------|-------|-------|--------|-------|----|-----|------|-------|------|
| 095837 | Guanine nucleotide-binding protein subunit alpha-14 OS=Homo sapiens GN=GNA14 PE=2 SV=1 - [GNA14_HUMAN] | 22.82 | 1 | 2  | 7  | 22  | 0.529 | 1.005 | 1.962 | 0.426 | 55.92  | 22.82 | 12 | 22  | 355  | 41.5  | 6.07 |
| Q8NE00 | Transmembrane protein 104 OS=Homo sapiens GN=TMEM104 PE=1 SV=2 - [TM104_HUMAN]                         | 2.82  | 1 | 1  | 1  | 1   | 0.384 | 0.385 | 0.560 | 0.426 | 2.13   | 2.82  | 1  | 1   | 496  | 55.6  | 7.20 |
| A6PW82 | Putative uncharacterized protein Cxorf30 OS=Homo sapiens GN=Cxorf30 PE=2 SV=2 - [CX030_HUMAN]          | 2.21  | 1 | 1  | 1  | 2   | 0.786 | 0.125 | 0.160 | 0.427 | 3.24   | 2.21  | 1  | 2   | 633  | 72.0  | 6.09 |
| Q92769 | Histone deacetylase 2 OS=Homo sapiens GN=HDAC2 PE=1 SV=2 - [HDAC2_HUMAN]                               | 15.37 | 1 | 3  | 6  | 24  | 1.539 | 1.127 | 1.556 | 0.429 | 50.52  | 15.37 | 10 | 24  | 488  | 55.3  | 5.91 |
| P09936 | Ubiquitin carboxyl-terminal hydrolase isozyme L1 OS=Homo sapiens GN=UCHL1 PE=1 SV=2 - [UCHL1_HUMAN]    | 69.96 | 2 | 16 | 17 | 370 | 0.666 | 0.704 | 0.977 | 0.430 | 928.84 | 69.96 | 30 | 370 | 223  | 24.8  | 5.48 |
| Q5XUX0 | F-box only protein 31 OS=Homo sapiens GN=FBXO31 PE=1 SV=2 - [FBX31_HUMAN]                              | 1.86  | 1 | 1  | 1  | 32  | 0.596 | 0.580 | 0.924 | 0.430 | 63.50  | 1.86  | 1  | 32  | 539  | 60.6  | 7.02 |
| Q6ZUB1 | Spermatogenesis-associated protein 31E1 OS=Homo sapiens GN=SPATA31E1 PE=2 SV=2 - [S31E1_HUMAN]         | 0.76  | 1 | 1  | 1  | 1   | 0.903 | 0.494 | 1.047 | 0.431 | 2.94   | 0.76  | 1  | 1   | 1445 | 157.0 | 9.10 |
| Q07075 | Glutaryl aminopeptidase OS=Homo sapiens GN=ENPEP PE=1 SV=3 - [AMPE_HUMAN]                              | 1.15  | 1 | 1  | 1  | 2   | 0.167 | 0.693 | 0.560 | 0.431 | 2.23   | 1.15  | 2  | 2   | 957  | 109.2 | 5.47 |
| Q68CZ1 | Protein fantom OS=Homo sapiens GN=RPGRIP1L PE=1 SV=2 - [FTM_HUMAN]                                     | 2.66  | 1 | 2  | 4  | 9   | 1.058 | 1.584 | 0.996 | 0.432 | 18.96  | 2.66  | 4  | 9   | 1315 | 151.1 | 5.35 |

|        |                                                                                                                     |       |   |   |   |   |       |       |       |       |       |       |   |   |     |      |      |
|--------|---------------------------------------------------------------------------------------------------------------------|-------|---|---|---|---|-------|-------|-------|-------|-------|-------|---|---|-----|------|------|
| Q68DU8 | BTB/POZ domain-containing protein KCTD16<br>OS=Homo sapiens<br>GN=KCTD16<br>PE=2 SV=1 - [KCD16_HUMAN]               | 2.34  | 1 | 1 | 1 | 1 | 0.823 | 0.294 | 0.695 | 0.432 | 0.00  | 2.34  | 1 | 1 | 428 | 49.1 | 8.09 |
| Q8N474 | Secreted frizzled-related protein 1<br>OS=Homo sapiens<br>GN=SFRP1<br>PE=1 SV=1 - [SFRP1_HUMAN]                     | 2.55  | 1 | 1 | 1 | 2 | 0.234 | 1.817 | 0.551 | 0.433 | 5.69  | 2.55  | 2 | 2 | 314 | 35.4 | 8.85 |
| Q9NUB1 | Acetyl-coenzyme A synthetase 2-like, mitochondrial<br>OS=Homo sapiens<br>GN=ACSS1<br>PE=1 SV=2 - [ACS2L_HUMAN]      | 1.16  | 1 | 1 | 1 | 1 | 0.698 | 0.608 | 0.384 | 0.434 | 0.00  | 1.16  | 1 | 1 | 689 | 74.8 | 7.11 |
| Q96Q07 | BTB/POZ domain-containing protein 9<br>OS=Homo sapiens<br>GN=BTBD9<br>PE=2 SV=2 - [BTBD9_HUMAN]                     | 7.03  | 1 | 3 | 3 | 3 | 0.457 | 0.368 | 0.254 | 0.435 | 1.81  | 7.03  | 3 | 3 | 612 | 69.1 | 5.77 |
| Q7Z736 | Pleckstrin homology domain-containing family H member 3<br>OS=Homo sapiens<br>GN=PLEKH3<br>PE=1 SV=2 - [PKH3_HUMAN] | 1.13  | 1 | 1 | 1 | 2 | 1.245 | 0.293 | 0.341 | 0.435 | 0.00  | 1.13  | 1 | 2 | 793 | 85.3 | 7.83 |
| Q6NZY7 | Cdc42 effector protein 5<br>OS=Homo sapiens<br>GN=CDC42EP5<br>PE=1 SV=1 - [BORG3_HUMAN]                             | 5.41  | 1 | 1 | 1 | 2 | 0.407 | 0.544 | 1.871 | 0.435 | 4.05  | 5.41  | 1 | 2 | 148 | 15.2 | 7.52 |
| P42771 | Cyclin-dependent kinase inhibitor 2A, isoforms 1/2/3<br>OS=Homo sapiens<br>GN=CDKN2A<br>PE=1 SV=2 - [CD2A1_HUMAN]   | 15.38 | 2 | 2 | 2 | 4 | 0.657 | 0.803 | 5.510 | 0.438 | 15.83 | 15.38 | 4 | 4 | 156 | 16.5 | 5.81 |
| Q7L5D6 | Golgi to ER traffic protein 4 homolog<br>OS=Homo sapiens<br>GN=GET4<br>PE=1 SV=1 - [GET4_HUMAN]                     | 4.59  | 1 | 1 | 1 | 3 | 0.911 | 0.538 | 0.552 | 0.439 | 11.24 | 4.59  | 2 | 3 | 327 | 36.5 | 5.41 |

|        |                                                                                                               |       |   |    |    |    |       |       |       |       |        |       |    |    |      |       |      |
|--------|---------------------------------------------------------------------------------------------------------------|-------|---|----|----|----|-------|-------|-------|-------|--------|-------|----|----|------|-------|------|
| Q13683 | Integrin alpha-7 OS=Homo sapiens<br>GN=ITGA7<br>PE=1 SV=3 - [ITA7_HUMAN]                                      | 13.55 | 1 | 16 | 16 | 43 | 0.192 | 3.336 | 2.086 | 0.439 | 85.72  | 13.55 | 27 | 43 | 1181 | 128.9 | 5.73 |
| Q8IZV5 | Retinol dehydrogenase 10 OS=Homo sapiens<br>GN=RDH10<br>PE=1 SV=1 - [RDH10_HUMAN]                             | 23.75 | 1 | 7  | 7  | 22 | 0.734 | 0.598 | 0.806 | 0.439 | 59.16  | 23.75 | 13 | 22 | 341  | 38.1  | 7.40 |
| P48547 | Potassium voltage-gated channel subfamily C member 1 OS=Homo sapiens<br>GN=KCNC1<br>PE=2 SV=1 - [KCNC1_HUMAN] | 2.74  | 1 | 1  | 1  | 13 | 0.543 | 0.505 | 0.491 | 0.441 | 5.97   | 2.74  | 1  | 13 | 511  | 57.9  | 6.58 |
| P08727 | Keratin, type I cytoskeletal 19 OS=Homo sapiens<br>GN=KRT19<br>PE=1 SV=4 - [K1C19_HUMAN]                      | 48.50 | 6 | 10 | 18 | 58 | 0.879 | 2.442 | 1.075 | 0.442 | 121.60 | 48.50 | 28 | 58 | 400  | 44.1  | 5.14 |
| P10070 | Zinc finger protein GLI2 OS=Homo sapiens<br>GN=GLI2 PE=1 SV=4 - [GLI2_HUMAN]                                  | 4.22  | 4 | 3  | 4  | 5  | 1.022 | 1.198 | 1.372 | 0.442 | 5.15   | 4.22  | 5  | 5  | 1586 | 167.7 | 7.33 |
| O60882 | Matrix metalloproteinase-20 OS=Homo sapiens<br>GN=MMP20<br>PE=1 SV=3 - [MMP20_HUMAN]                          | 2.07  | 1 | 1  | 1  | 2  | 1.060 | 0.970 | 0.606 | 0.442 | 4.87   | 2.07  | 1  | 2  | 483  | 54.4  | 8.87 |
| Q9HC77 | Centromere protein J OS=Homo sapiens<br>GN=CENPJ<br>PE=1 SV=2 - [CENPJ_HUMAN]                                 | 1.35  | 1 | 1  | 2  | 2  | 1.014 | 1.104 | 1.097 | 0.442 | 0.00   | 1.35  | 2  | 2  | 1338 | 152.9 | 6.61 |
| Q8N608 | Inactive dipeptidyl peptidase 10 OS=Homo sapiens<br>GN=DPP10<br>PE=1 SV=2 - [DPP10_HUMAN]                     | 2.01  | 1 | 2  | 2  | 2  | 1.053 | 1.186 | 0.351 | 0.442 | 3.94   | 2.01  | 2  | 2  | 796  | 90.8  | 6.57 |
| P00325 | Alcohol dehydrogenase 1B OS=Homo sapiens<br>GN=ADH1B<br>PE=1 SV=2 - [ADH1B_HUMAN]                             | 27.73 | 3 | 13 | 13 | 58 | 0.405 | 0.737 | 0.329 | 0.443 | 130.76 | 27.73 | 23 | 58 | 375  | 39.8  | 8.29 |

|        |                                                                                                                                         |       |   |     |     |      |       |       |       |       |         |       |     |      |      |       |      |
|--------|-----------------------------------------------------------------------------------------------------------------------------------------|-------|---|-----|-----|------|-------|-------|-------|-------|---------|-------|-----|------|------|-------|------|
| O00423 | Echinoderm<br>microtubule-<br>associated<br>protein-like 1<br>OS=Homo<br>sapiens<br>GN=EML1<br>PE=1 SV=3 -<br>[EMALL_HUMAN<br>]         | 34.97 | 1 | 28  | 28  | 105  | 1.330 | 0.968 | 1.711 | 0.444 | 235.11  | 34.97 | 45  | 105  | 815  | 89.8  | 7.06 |
| Q9NT68 | Teneurin-2<br>OS=Homo<br>sapiens<br>GN=TENM2<br>PE=1 SV=3 -<br>[TEN2_HUMAN]                                                             | 0.40  | 1 | 1   | 1   | 1    | 0.673 | 0.653 | 0.737 | 0.444 | 2.52    | 0.40  | 1   | 1    | 2774 | 307.6 | 6.68 |
| Q9BQ52 | Zinc<br>phosphodiester<br>ase ELAC<br>protein 2<br>OS=Homo<br>sapiens<br>GN=ELAC2<br>PE=1 SV=2 -<br>[RNZ2_HUMAN]                        | 1.33  | 1 | 1   | 1   | 1    | 2.398 | 1.465 | 1.179 | 0.445 | 3.03    | 1.33  | 1   | 1    | 826  | 92.2  | 7.90 |
| P17302 | Gap junction<br>alpha-1<br>protein<br>OS=Homo<br>sapiens<br>GN=GJA1 PE=1<br>SV=2 -<br>[CXA1_HUMAN]                                      | 5.76  | 1 | 2   | 2   | 5    | 0.612 | 0.957 | 0.748 | 0.446 | 16.21   | 5.76  | 3   | 5    | 382  | 43.0  | 8.76 |
| Q3SY69 | Mitochondrial<br>10-<br>formyltetrahydr<br>ofolate<br>dehydrogenase<br>OS=Homo<br>sapiens<br>GN=ALDH1L2<br>PE=1 SV=2 -<br>[AL1L2_HUMAN] | 36.51 | 1 | 28  | 33  | 131  | 0.469 | 0.630 | 0.702 | 0.446 | 317.39  | 36.51 | 52  | 131  | 923  | 101.7 | 6.52 |
| P30530 | Tyrosine-<br>protein kinase<br>receptor UFO<br>OS=Homo<br>sapiens<br>GN=AXL PE=1<br>SV=3 -<br>[UFO_HUMAN]                               | 1.90  | 1 | 1   | 1   | 3    | 1.002 | 0.607 | 1.152 | 0.447 | 9.25    | 1.90  | 2   | 3    | 894  | 98.3  | 5.43 |
| Q3B820 | Protein<br>FAM161A<br>OS=Homo<br>sapiens<br>GN=FAM161A<br>PE=1 SV=2 -<br>[F161A_HUMAN<br>]                                              | 2.27  | 1 | 2   | 2   | 2    | 0.408 | 0.573 | 0.803 | 0.449 | 4.03    | 2.27  | 2   | 2    | 660  | 76.7  | 8.03 |
| Q96PY5 | Formin-like<br>protein 2<br>OS=Homo<br>sapiens<br>GN=FMNL2<br>PE=1 SV=3 -<br>[FMNL2_HUMAN<br>]                                          | 3.96  | 1 | 2   | 4   | 8    | 0.859 | 0.402 | 0.578 | 0.449 | 15.48   | 3.96  | 6   | 8    | 1086 | 123.2 | 7.40 |
| P35580 | Myosin-10<br>OS=Homo<br>sapiens<br>GN=MYH10<br>PE=1 SV=3 -<br>[MYH10_HUMA<br>N]                                                         | 64.32 | 2 | 120 | 160 | 1926 | 0.431 | 0.640 | 0.843 | 0.449 | 5387.89 | 64.32 | 258 | 1926 | 1976 | 228.9 | 5.54 |

|        |                                                                                                                             |       |   |    |    |     |       |       |       |       |         |       |    |     |     |      |      |
|--------|-----------------------------------------------------------------------------------------------------------------------------|-------|---|----|----|-----|-------|-------|-------|-------|---------|-------|----|-----|-----|------|------|
| Q01995 | Transgelin<br>OS=Homo sapiens<br>GN=TAGLN<br>PE=1 SV=4 - [TAGL_HUMAN]                                                       | 77.61 | 1 | 19 | 19 | 851 | 0.575 | 1.507 | 2.652 | 0.451 | 2095.24 | 77.61 | 36 | 851 | 201 | 22.6 | 8.84 |
| Q96BW5 | Phosphotrieste<br>rase-related<br>protein<br>OS=Homo sapiens<br>GN=PTER<br>PE=1 SV=1 - [PTER_HUMAN]                         | 4.87  | 1 | 2  | 2  | 4   | 0.547 | 0.968 | 0.610 | 0.452 | 10.18   | 4.87  | 3  | 4   | 349 | 39.0 | 6.52 |
| Q3B726 | DNA-directed<br>RNA<br>polymerase I<br>subunit RPA43<br>OS=Homo sapiens<br>GN=TWISTNB<br>PE=1 SV=1 - [RPA43_HUMAN<br>]      | 2.07  | 1 | 1  | 1  | 3   | 0.577 | 0.527 | 0.643 | 0.454 | 7.30    | 2.07  | 2  | 3   | 338 | 37.4 | 6.98 |
| P15531 | Nucleoside<br>diphosphate<br>kinase A<br>OS=Homo sapiens<br>GN=NME1<br>PE=1 SV=1 - [NDKA_HUMAN]                             | 57.89 | 1 | 4  | 9  | 246 | 0.726 | 0.633 | 0.717 | 0.455 | 478.19  | 57.89 | 17 | 246 | 152 | 17.1 | 6.19 |
| Q9UKW4 | Guanine<br>nucleotide<br>exchange<br>factor VAV3<br>OS=Homo sapiens<br>GN=VAV3<br>PE=1 SV=1 - [VAV3_HUMAN]                  | 1.77  | 2 | 1  | 2  | 4   | 0.414 |       | 1.311 | 0.455 | 6.63    | 1.77  | 2  | 4   | 847 | 97.7 | 7.05 |
| O75911 | Short-chain<br>dehydrogenase<br>/reductase 3<br>OS=Homo sapiens<br>GN=DHRS3<br>PE=1 SV=2 - [DHRS3_HUMAN<br>]                | 23.18 | 1 | 6  | 6  | 26  | 0.480 | 1.590 | 1.181 | 0.455 | 51.06   | 23.18 | 11 | 26  | 302 | 33.5 | 8.84 |
| P02795 | Metallothionein-<br>2 OS=Homo sapiens<br>GN=MT2A<br>PE=1 SV=1 - [MT2_HUMAN]                                                 | 13.11 | 5 | 1  | 1  | 3   | 0.416 | 0.160 | 0.410 | 0.459 | 7.96    | 13.11 | 2  | 3   | 61  | 6.0  | 7.83 |
| P32322 | Pyroline-5-<br>carboxylate<br>reductase 1,<br>mitochondrial<br>OS=Homo sapiens<br>GN=PYCR1<br>PE=1 SV=2 - [P5CR1_HUMAN<br>] | 40.44 | 1 | 7  | 8  | 22  | 0.435 | 0.788 | 0.640 | 0.460 | 79.31   | 40.44 | 13 | 22  | 319 | 33.3 | 7.61 |

|        |                                                                                                                                                          |       |   |    |    |     |       |       |       |       |         |       |    |     |      |       |      |
|--------|----------------------------------------------------------------------------------------------------------------------------------------------------------|-------|---|----|----|-----|-------|-------|-------|-------|---------|-------|----|-----|------|-------|------|
| P29350 | Tyrosine-<br>protein<br>phosphatase<br>non-receptor<br>type 6<br>OS=Homo<br>sapiens<br>GN=PTPN6<br>PE=1 SV=1 -<br>[PTN6_HUMAN]                           | 5.88  | 1 | 2  | 3  | 5   | 1.050 | 0.205 | 0.291 | 0.461 | 0.00    | 5.88  | 4  | 5   | 595  | 67.5  | 7.78 |
| A2RUC4 | tRNA<br>wybutosine-<br>synthesizing<br>protein 5<br>OS=Homo<br>sapiens<br>GN=TYW5<br>PE=1 SV=1 -<br>[TYW5_HUMAN<br>]                                     | 12.70 | 1 | 2  | 2  | 4   | 1.203 | 0.847 | 1.158 | 0.462 | 2.40    | 12.70 | 2  | 4   | 315  | 36.5  | 7.55 |
| Q99490 | Arf-GAP with<br>GTPase, ANK<br>repeat and PH<br>domain-<br>containing<br>protein 2<br>OS=Homo<br>sapiens<br>GN=AGAP2<br>PE=1 SV=2 -<br>[AGAP2_HUMAN<br>] | 8.05  | 1 | 3  | 4  | 9   | 0.833 | 0.983 | 0.738 | 0.463 | 9.77    | 8.05  | 4  | 9   | 1192 | 124.6 | 9.89 |
| Q9UKT9 | Zinc finger<br>protein Aiolos<br>OS=Homo<br>sapiens<br>GN=IKZF3<br>PE=1 SV=2 -<br>[IKZF3_HUMAN<br>]                                                      | 3.54  | 2 | 1  | 2  | 2   | 0.404 | 1.608 | 3.089 | 0.464 | 3.51    | 3.54  | 2  | 2   | 509  | 58.0  | 6.55 |
| Q9BXU7 | Ubiquitin<br>carboxyl-<br>terminal<br>hydrolase 26<br>OS=Homo<br>sapiens<br>GN=USP26<br>PE=1 SV=1 -<br>[UBP26_HUMAN<br>]                                 | 0.99  | 1 | 1  | 1  | 1   | 1.581 | 0.150 | 0.272 | 0.465 | 2.36    | 0.99  | 1  | 1   | 913  | 104.0 | 8.70 |
| Q8TEQ8 | GPI<br>ethanolamine<br>phosphate<br>transferase 3<br>OS=Homo<br>sapiens<br>GN=PIGO<br>PE=1 SV=3 -<br>[PIGO_HUMAN]                                        | 2.11  | 1 | 2  | 2  | 6   | 0.878 | 1.227 | 0.923 | 0.465 | 12.95   | 2.11  | 3  | 6   | 1089 | 118.6 | 8.12 |
| P08123 | Collagen alpha-<br>2(I) chain<br>OS=Homo<br>sapiens<br>GN=COL1A2<br>PE=1 SV=7 -<br>[CO1A2_HUMA<br>N]                                                     | 66.62 | 1 | 61 | 61 | 431 | 0.406 | 0.686 | 0.595 | 0.465 | 1085.92 | 66.62 | 99 | 431 | 1366 | 129.2 | 8.95 |
| P24390 | ER lumen<br>protein-<br>retaining<br>receptor 1<br>OS=Homo<br>sapiens<br>GN=KDEL1<br>PE=1 SV=1 -<br>[ERD21_HUMAN<br>]                                    | 3.77  | 2 | 1  | 1  | 2   | 0.352 | 0.317 | 0.385 | 0.465 | 2.81    | 3.77  | 2  | 2   | 212  | 24.5  | 8.62 |



|        |                                                                                                             |       |   |    |    |    |       |       |       |       |        |       |    |    |      |       |      |
|--------|-------------------------------------------------------------------------------------------------------------|-------|---|----|----|----|-------|-------|-------|-------|--------|-------|----|----|------|-------|------|
| Q6ZQY3 | Addic amino acid decarboxylase GADL1<br>OS=Homo sapiens<br>GN=GADL1<br>PE=1 SV=4 - [GADL1_HUMAN]            | 1.54  | 1 | 1  | 1  | 2  | 1.048 | 0.647 | 0.627 | 0.466 | 4.43   | 1.54  | 1  | 2  | 521  | 59.2  | 6.37 |
| B0FP48 | Uroplakin-3b-like protein<br>OS=Homo sapiens<br>GN=UPK3BL<br>PE=2 SV=1 - [UPK3L_HUMAN]                      | 5.32  | 1 | 1  | 1  | 1  | 1.174 | 2.006 | 0.909 | 0.470 | 0.00   | 5.32  | 1  | 1  | 263  | 28.4  | 8.21 |
| Q969R5 | Lethal(3)malignant brain tumor-like protein 2<br>OS=Homo sapiens<br>GN=L3MBTL2<br>PE=1 SV=1 - [UMBL2_HUMAN] | 1.70  | 1 | 1  | 1  | 1  | 1.202 | 0.668 | 1.230 | 0.472 | 3.38   | 1.70  | 1  | 1  | 705  | 79.1  | 6.84 |
| H3B589 | Transmembrane protein 178B<br>OS=Homo sapiens<br>GN=TMEM178B<br>PE=2 SV=1 - [T178B_HUMAN]                   | 4.42  | 1 | 1  | 1  | 1  | 0.724 | 0.699 | 0.544 | 0.472 | 3.29   | 4.42  | 1  | 1  | 294  | 33.4  | 9.25 |
| O00391 | Sulfhydryl oxidase 1<br>OS=Homo sapiens<br>GN=QSOX1<br>PE=1 SV=3 - [QSOX1_HUMAN]                            | 25.70 | 1 | 18 | 18 | 44 | 0.562 | 1.186 | 0.733 | 0.472 | 107.79 | 25.70 | 29 | 44 | 747  | 82.5  | 8.92 |
| P20908 | Collagen alpha-1(V) chain<br>OS=Homo sapiens<br>GN=COL5A1<br>PE=1 SV=3 - [COSA1_HUMAN]                      | 16.16 | 2 | 19 | 20 | 56 | 0.556 | 0.785 | 0.705 | 0.472 | 130.40 | 16.16 | 26 | 56 | 1838 | 183.4 | 5.06 |
| Q9C019 | Tripartite motif-containing protein 15<br>OS=Homo sapiens<br>GN=TRIM15<br>PE=2 SV=1 - [TRI15_HUMAN]         | 2.15  | 1 | 1  | 1  | 2  | 0.830 | 0.912 | 1.400 | 0.473 | 2.58   | 2.15  | 1  | 2  | 465  | 52.1  | 5.57 |
| Q8NFJ5 | Retinoic acid-induced protein 3<br>OS=Homo sapiens<br>GN=GPRC5A<br>PE=1 SV=2 - [RAI3_HUMAN]                 | 7.56  | 1 | 2  | 2  | 5  | 3.569 | 0.526 | 0.860 | 0.473 | 11.52  | 7.56  | 3  | 5  | 357  | 40.2  | 8.15 |
| Q9UGU0 | Transcription factor 20<br>OS=Homo sapiens<br>GN=TCF20<br>PE=1 SV=3 - [TCF20_HUMAN]                         | 1.22  | 1 | 2  | 2  | 3  | 1.349 | 0.674 | 0.606 | 0.474 | 3.26   | 1.22  | 3  | 3  | 1960 | 211.6 | 9.04 |

|        |                                                                                                                                                                       |       |   |    |    |      |       |       |       |       |         |       |    |      |      |       |      |
|--------|-----------------------------------------------------------------------------------------------------------------------------------------------------------------------|-------|---|----|----|------|-------|-------|-------|-------|---------|-------|----|------|------|-------|------|
| Q9NYQ8 | Protocadherin<br>Fat 2<br>OS=Homo<br>sapiens<br>GN=FAT2<br>PE=1 SV=2 -<br>[FAT2_HUMAN]                                                                                | 1.33  | 1 | 3  | 3  | 6    | 3.178 | 1.418 | 1.659 | 0.474 | 8.76    | 1.33  | 3  | 6    | 4349 | 479.0 | 5.16 |
| O75023 | Leukocyte<br>immunoglobulin-<br>like receptor<br>subfamily B<br>member 5<br>OS=Homo<br>sapiens<br>GN=LIRB5<br>PE=1 SV=1 -<br>[LIRB5_HUMAN]                            | 3.39  | 1 | 2  | 2  | 5    | 0.989 | 0.441 | 0.610 | 0.475 | 4.13    | 3.39  | 2  | 5    | 590  | 64.1  | 7.30 |
| P15498 | Proto-<br>oncogene vav<br>OS=Homo<br>sapiens<br>GN=VAV1<br>PE=1 SV=4 -<br>[VAV_HUMAN]                                                                                 | 3.55  | 1 | 3  | 4  | 5    | 0.767 | 1.215 | 0.983 | 0.475 | 11.27   | 3.55  | 4  | 5    | 845  | 98.3  | 6.62 |
| Q8N5C1 | Protein<br>FAM26E<br>OS=Homo<br>sapiens<br>GN=FAM26E<br>PE=2 SV=1 -<br>[FA26E_HUMAN<br>]                                                                              | 10.68 | 1 | 3  | 3  | 5    | 0.829 | 0.317 | 0.701 | 0.477 | 16.53   | 10.68 | 3  | 5    | 309  | 35.1  | 8.13 |
| P29966 | Myristoylated<br>alanine-rich C-<br>kinase<br>substrate<br>OS=Homo<br>sapiens<br>GN=MARCKS<br>PE=1 SV=4 -<br>[MARCS_HUMA<br>DNA<br>polymerase<br>subunit gamma-<br>2, | 36.75 | 1 | 9  | 9  | 106  | 0.889 | 1.058 | 1.071 | 0.478 | 342.33  | 36.75 | 15 | 106  | 332  | 31.5  | 4.45 |
| Q9UHN1 | mitochondrial<br>OS=Homo<br>sapiens<br>GN=POLG2<br>PE=1 SV=1 -<br>[DPOG2_HUMA                                                                                         | 2.47  | 1 | 1  | 1  | 1    | 1.189 | 0.135 | 0.228 | 0.478 | 0.00    | 2.47  | 1  | 1    | 485  | 54.9  | 8.35 |
| P09493 | Tropomyosin<br>alpha-1 chain<br>OS=Homo<br>sapiens<br>GN=TPM1<br>PE=1 SV=2 -<br>[TPM1_HUMAN]                                                                          | 83.45 | 1 | 17 | 46 | 1389 | 0.667 | 0.984 | 1.528 | 0.479 | 3283.35 | 83.45 | 76 | 1389 | 284  | 32.7  | 4.74 |
| P12757 | SkI-like protein<br>OS=Homo<br>sapiens<br>GN=SKIL PE=1<br>SV=2 -<br>[SKIL_HUMAN]                                                                                      | 3.51  | 1 | 1  | 3  | 6    | 0.664 | 0.792 | 1.672 | 0.480 | 12.48   | 3.51  | 3  | 6    | 684  | 76.9  | 7.11 |
| O94832 | Unconventional<br>myosin-IId<br>OS=Homo<br>sapiens<br>GN=MYO1D<br>PE=1 SV=2 -<br>[MYO1D_HUMA<br>N]                                                                    | 17.10 | 1 | 14 | 18 | 45   | 0.233 | 0.945 | 0.906 | 0.481 | 85.53   | 17.10 | 26 | 45   | 1006 | 116.1 | 9.39 |

|        |                                                                                                                  |       |   |    |    |    |       |       |       |       |        |       |    |    |      |       |      |
|--------|------------------------------------------------------------------------------------------------------------------|-------|---|----|----|----|-------|-------|-------|-------|--------|-------|----|----|------|-------|------|
| P09486 | SPARC<br>OS=Homo sapiens<br>GN=SPARC<br>PE=1 SV=1 - [SPRC_HUMAN]                                                 | 33.66 | 1 | 12 | 12 | 68 | 0.364 | 0.397 | 0.658 | 0.481 | 171.44 | 33.66 | 21 | 68 | 303  | 34.6  | 4.84 |
| P02100 | Hemoglobin subunit epsilon<br>OS=Homo sapiens<br>GN=HBE1<br>PE=1 SV=2 - [HBE_HUMAN]                              | 6.12  | 3 | 1  | 1  | 4  | 1.475 | 0.435 | 1.055 | 0.481 | 14.59  | 6.12  | 2  | 4  | 147  | 16.2  | 8.63 |
| Q9BXW9 | Fanconi anemia group D2 protein<br>OS=Homo sapiens<br>GN=FACD2<br>PE=1 SV=2 - [FACD2_HUMAN]                      | 0.55  | 1 | 1  | 1  | 1  | 0.512 | 0.494 | 1.037 | 0.483 | 2.24   | 0.55  | 1  | 1  | 1451 | 164.0 | 5.88 |
| Q8N556 | Actin filament-associated protein 1<br>OS=Homo sapiens<br>GN=AFAP1<br>PE=1 SV=2 - [AFAP1_HUMAN]                  | 17.95 | 1 | 12 | 12 | 27 | 0.709 | 0.947 | 1.270 | 0.484 | 45.72  | 17.95 | 20 | 27 | 730  | 80.7  | 8.68 |
| Q92625 | Ankyrin repeat and SAM domain-containing protein 1A<br>OS=Homo sapiens<br>GN=ANKS1A<br>PE=1 SV=4 - [ANS1A_HUMAN] | 5.47  | 1 | 4  | 5  | 14 | 1.148 | 1.584 | 1.678 | 0.484 | 40.68  | 5.47  | 6  | 14 | 1134 | 123.0 | 6.38 |
| Q5T5P2 | Sickle tail protein homolog<br>OS=Homo sapiens<br>GN=KIAA1217<br>PE=1 SV=2 - [SKT_HUMAN]                         | 2.16  | 2 | 1  | 4  | 11 | 0.283 |       | 0.503 | 0.484 | 4.39   | 2.16  | 4  | 11 | 1943 | 214.0 | 7.06 |
| P01563 | Interferon alpha-2<br>OS=Homo sapiens<br>GN=IFNA2<br>PE=1 SV=1 - [IFNA2_HUMAN]                                   | 4.79  | 1 | 1  | 1  | 1  | 1.039 | 0.867 | 0.755 | 0.484 | 2.16   | 4.79  | 1  | 1  | 188  | 21.5  | 6.76 |
| P08582 | Melanotransferin<br>OS=Homo sapiens<br>GN=MFI2<br>PE=1 SV=2 - [TRFM_HUMAN]                                       | 7.45  | 1 | 5  | 5  | 11 | 0.356 | 1.267 | 1.174 | 0.484 | 20.36  | 7.45  | 8  | 11 | 738  | 80.2  | 5.94 |
| Q02108 | Guanylate cyclase soluble subunit alpha-3<br>OS=Homo sapiens<br>GN=GUCY1A3<br>PE=1 SV=2 - [GCYA3_HUMAN]          | 3.77  | 1 | 3  | 3  | 6  | 0.563 | 0.721 | 1.121 | 0.484 | 14.76  | 3.77  | 4  | 6  | 690  | 77.4  | 7.11 |

|        |                                                                                                                                            |       |   |   |   |    |       |       |       |       |       |       |    |    |      |       |      |
|--------|--------------------------------------------------------------------------------------------------------------------------------------------|-------|---|---|---|----|-------|-------|-------|-------|-------|-------|----|----|------|-------|------|
| O60291 | E3 ubiquitin-protein ligase<br>MGRN1<br>OS=Homo sapiens<br>GN=MGRN1<br>PE=1 SV=2 - [MGRN1_HUMAN]                                           | 8.51  | 2 | 4 | 4 | 11 | 0.896 | 0.648 | 0.603 | 0.485 | 23.57 | 8.51  | 6  | 11 | 552  | 60.7  | 5.15 |
| Q9NWD9 | Protein BEX4<br>OS=Homo sapiens<br>GN=BEX4<br>PE=2 SV=1 - [BEX4_HUMAN]                                                                     | 15.00 | 1 | 1 | 1 | 1  | 1.413 | 0.109 | 0.308 | 0.486 | 0.00  | 15.00 | 1  | 1  | 120  | 14.1  | 6.39 |
| P02042 | Hemoglobin subunit delta<br>OS=Homo sapiens<br>GN=HBD PE=1 SV=2 - [HBD_HUMAN]                                                              | 17.01 | 2 | 2 | 2 | 6  | 1.039 | 0.377 | 0.982 | 0.486 | 7.48  | 17.01 | 3  | 6  | 147  | 16.0  | 8.05 |
| O75815 | Breast cancer anti-estrogen resistance protein 3<br>OS=Homo sapiens<br>GN=BCAR3<br>PE=1 SV=1 - [BCAR3_HUMAN]                               | 4.12  | 1 | 2 | 2 | 2  | 1.806 | 1.237 | 1.495 | 0.487 | 2.59  | 4.12  | 2  | 2  | 825  | 92.5  | 7.96 |
| Q5VV67 | Peroxisome proliferator-activated receptor gamma coactivator-related protein 1<br>OS=Homo sapiens<br>GN=PPRC1<br>PE=1 SV=1 - [PPRC1_HUMAN] | 1.02  | 1 | 1 | 2 | 2  | 0.853 | 0.470 | 0.604 | 0.487 | 3.69  | 1.02  | 2  | 2  | 1664 | 177.4 | 6.51 |
| Q04671 | P protein<br>OS=Homo sapiens<br>GN=OCA2<br>PE=1 SV=2 - [P_HUMAN]                                                                           | 6.21  | 1 | 2 | 2 | 4  | 1.062 | 0.913 | 1.149 | 0.487 | 0.00  | 6.21  | 2  | 4  | 838  | 92.8  | 7.27 |
| Q6UWR7 | Ectonucleotide pyrophosphatase/phosphodiesterase family member 6<br>OS=Homo sapiens<br>GN=ENPP6<br>PE=1 SV=2 - [ENPP6_HUMAN]               | 3.41  | 1 | 1 | 1 | 1  | 1.210 | 0.894 | 0.838 | 0.488 | 0.00  | 3.41  | 1  | 1  | 440  | 50.2  | 7.99 |
| Q9BTT6 | Leucine-rich repeat-containing protein 1<br>OS=Homo sapiens<br>GN=LRRC1<br>PE=1 SV=1 - [LRRC1_HUMAN]                                       | 13.55 | 1 | 3 | 6 | 15 | 0.885 | 1.131 | 1.252 | 0.488 | 32.85 | 13.55 | 11 | 15 | 524  | 59.2  | 5.02 |

|        |                                                                                                                                    |       |   |    |    |    |       |       |       |       |        |       |    |    |      |       |      |
|--------|------------------------------------------------------------------------------------------------------------------------------------|-------|---|----|----|----|-------|-------|-------|-------|--------|-------|----|----|------|-------|------|
| P27144 | Adenylate kinase 4, mitochondrial<br>OS=Homo sapiens<br>GN=AK4 PE=1<br>SV=1 -<br>[KAD4_HUMAN]                                      | 54.26 | 1 | 12 | 12 | 45 | 0.991 | 0.884 | 0.619 | 0.489 | 84.04  | 54.26 | 20 | 45 | 223  | 25.3  | 8.40 |
| P23352 | Anosmin-1<br>OS=Homo sapiens<br>GN=KAL1 PE=1<br>SV=3 -<br>[KALM_HUMAN]                                                             | 2.06  | 1 | 1  | 1  | 2  | 0.380 | 0.489 | 0.432 | 0.489 | 4.74   | 2.06  | 1  | 2  | 680  | 76.1  | 9.16 |
| Q70E73 | Ras-associated and pleckstrin homology domains-containing protein 1<br>OS=Homo sapiens<br>GN=RAPH1<br>PE=1 SV=3 -<br>[RAPH1_HUMAN] | 17.84 | 1 | 18 | 18 | 36 | 0.765 | 0.806 | 1.147 | 0.489 | 76.28  | 17.84 | 24 | 36 | 1250 | 135.2 | 8.85 |
| Q86UV6 | Tripartite motif-containing protein 74<br>OS=Homo sapiens<br>GN=TRIM74<br>PE=2 SV=1 -<br>[TRI74_HUMAN]                             | 4.40  | 2 | 1  | 1  | 1  | 1.055 | 0.350 | 0.743 | 0.490 | 2.80   | 4.40  | 1  | 1  | 250  | 28.5  | 6.27 |
| Q9BZQ8 | Protein Niban<br>OS=Homo sapiens<br>GN=FAM129A<br>PE=1 SV=1 -<br>[NIBAN_HUMAN]                                                     | 24.68 | 1 | 22 | 22 | 83 | 0.451 | 2.280 | 1.099 | 0.490 | 211.65 | 24.68 | 37 | 83 | 928  | 103.1 | 4.78 |
| O43156 | TELO2-interacting protein 1 homolog<br>OS=Homo sapiens<br>GN=TTI1 PE=1<br>SV=3 -<br>[TTI1_HUMAN]                                   | 2.30  | 1 | 2  | 2  | 3  | 1.018 | 0.997 | 0.526 | 0.491 | 3.10   | 2.30  | 2  | 3  | 1089 | 122.0 | 5.97 |
| Q9NR56 | Muscleblind-like protein 1<br>OS=Homo sapiens<br>GN=MBNL1<br>PE=1 SV=2 -<br>[MBNL1_HUMAN]                                          | 14.18 | 2 | 2  | 6  | 33 | 0.490 | 0.708 | 1.069 | 0.492 | 55.69  | 14.18 | 11 | 33 | 388  | 41.8  | 8.90 |
| Q9UK55 | TRAF2 and NCK-interacting protein kinase<br>OS=Homo sapiens<br>GN=TNIK PE=1<br>SV=1 -<br>[TNIK_HUMAN]                              | 8.75  | 2 | 4  | 11 | 19 | 0.638 | 1.060 | 1.123 | 0.495 | 40.46  | 8.75  | 15 | 19 | 1360 | 154.8 | 7.17 |
| Q9UKX5 | Integrin alpha-11<br>OS=Homo sapiens<br>GN=ITGA11<br>PE=1 SV=2 -<br>[ITA11_HUMAN]                                                  | 11.87 | 1 | 13 | 13 | 32 | 0.614 | 0.428 | 0.557 | 0.496 | 46.17  | 11.87 | 20 | 32 | 1188 | 133.4 | 6.70 |

|        |                                                                                                                              |       |   |    |    |     |       |       |       |       |        |       |    |     |      |       |      |
|--------|------------------------------------------------------------------------------------------------------------------------------|-------|---|----|----|-----|-------|-------|-------|-------|--------|-------|----|-----|------|-------|------|
| O95319 | CUGBP Elav-like family member<br>2 OS=Homo sapiens<br>GN=CELF2<br>PE=1 SV=1 - [CELF2_HUMAN]                                  | 3.94  | 1 | 1  | 2  | 4   | 0.619 | 3.149 | 1.563 | 0.497 | 8.55   | 3.94  | 2  | 4   | 508  | 54.3  | 8.76 |
| O75909 | Cyclin-K<br>OS=Homo sapiens<br>GN=CCNK<br>PE=1 SV=2 - [CCNK_HUMAN]                                                           | 2.76  | 1 | 1  | 1  | 2   | 0.489 | 1.293 | 0.935 | 0.498 | 6.14   | 2.76  | 1  | 2   | 580  | 64.2  | 8.41 |
| O94808 | Glutamine--fructose-6-phosphate aminotransferase [isomerizing]<br>2 OS=Homo sapiens<br>GN=GFPT2<br>PE=1 SV=3 - [GFPT2_HUMAN] | 19.79 | 1 | 7  | 12 | 31  | 0.217 | 0.912 | 1.013 | 0.499 | 75.95  | 19.79 | 19 | 31  | 682  | 76.9  | 7.37 |
| O60637 | Tetraspanin-3<br>OS=Homo sapiens<br>GN=TSPAN3<br>PE=2 SV=1 - [TSN3_HUMAN]                                                    | 2.77  | 1 | 1  | 1  | 5   | 0.612 | 0.488 | 0.652 | 0.500 | 11.49  | 2.77  | 2  | 5   | 253  | 28.0  | 5.81 |
| Q86YC3 | Negative regulator of reactive oxygen species<br>OS=Homo sapiens<br>GN=NRROS<br>PE=1 SV=1 - [NRROS_HUMAN]                    | 1.59  | 1 | 1  | 1  | 3   | 1.766 | 0.671 | 2.424 | 0.500 | 6.82   | 1.59  | 1  | 3   | 692  | 76.3  | 6.16 |
| Q8TD30 | Alanine aminotransferase 2<br>OS=Homo sapiens<br>GN=GPT2<br>PE=1 SV=1 - [ALAT2_HUMAN]                                        | 5.54  | 1 | 3  | 3  | 7   | 0.510 | 0.718 | 0.772 | 0.500 | 10.64  | 5.54  | 4  | 7   | 523  | 57.9  | 7.71 |
| P36956 | Sterol regulatory element-binding protein 1<br>OS=Homo sapiens<br>GN=SREBF1<br>PE=1 SV=2 - [SRBP1_HUMAN]                     | 1.66  | 1 | 2  | 2  | 2   | 0.348 | 0.485 | 1.089 | 0.502 | 0.00   | 1.66  | 2  | 2   | 1147 | 121.6 | 8.13 |
| Q9H7C4 | Syncoilin<br>OS=Homo sapiens<br>GN=SYNC<br>PE=1 SV=3 - [SYNCL_HUMAN]                                                         | 32.78 | 1 | 13 | 13 | 56  | 0.567 | 1.600 | 1.350 | 0.502 | 141.04 | 32.78 | 20 | 56  | 482  | 55.3  | 4.61 |
| O94925 | Glutaminase kidney isoform, mitochondrial<br>OS=Homo sapiens<br>GN=GLS PE=1 SV=1 - [GLSK_HUMAN]                              | 42.75 | 1 | 22 | 23 | 101 | 0.418 | 0.872 | 1.123 | 0.502 | 315.41 | 42.75 | 34 | 101 | 669  | 73.4  | 7.77 |

|        |                                                                                                                  |       |   |    |    |    |       |       |       |       |        |       |    |    |       |      |      |
|--------|------------------------------------------------------------------------------------------------------------------|-------|---|----|----|----|-------|-------|-------|-------|--------|-------|----|----|-------|------|------|
| Q9UBY9 | Heat shock protein beta-7<br>OS=Homo sapiens<br>GN=HSPB7<br>PE=1 SV=1 - [HSPB7_HUMAN]                            | 55.88 | 1 | 7  | 7  | 56 | 0.313 | 1.969 | 1.873 | 0.503 | 129.94 | 55.88 | 11 | 56 | 170   | 18.6 | 6.52 |
| Q9HBA9 | Putative N-acetylated-alpha-linked acidic dipeptidase<br>OS=Homo sapiens<br>GN=FOH1B<br>PE=2 SV=1 - [FOH1B_HUMA] | 5.66  | 3 | 3  | 3  | 3  | 1.955 | 0.206 | 0.630 | 0.503 | 3.81   | 5.66  | 3  | 3  | 442   | 50.0 | 7.02 |
| Q16270 | Insulin-like growth factor-binding protein 7<br>OS=Homo sapiens<br>GN=IGFBP7<br>PE=1 SV=1 - [IBP7_HUMAN]         | 34.75 | 1 | 10 | 11 | 29 | 0.760 | 0.743 | 1.554 | 0.503 | 69.83  | 34.75 | 15 | 29 | 282   | 29.1 | 7.90 |
| Q8WXI7 | Mucin-16<br>OS=Homo sapiens<br>GN=MUC16<br>PE=1 SV=2 - [MUC16_HUMAN]                                             | 0.76  | 1 | 7  | 7  | 11 | 1.269 | 0.604 | 1.015 | 0.503 | 12.77  | 0.76  | 7  | 11 | 22152 | #### | 6.00 |
| Q9NRP0 | Oligosaccharyltransferase complex subunit OSTC<br>OS=Homo sapiens<br>GN=OSTC<br>PE=1 SV=1 - [OSTC_HUMAN]         | 8.05  | 1 | 1  | 1  | 1  | 0.683 | 0.510 | 0.436 | 0.503 | 4.11   | 8.05  | 1  | 1  | 149   | 16.8 | 9.13 |
| Q8NEA6 | Zinc finger protein GLIS3<br>OS=Homo sapiens<br>GN=GLIS3<br>PE=2 SV=5 - [GLIS3_HUMAN]                            | 4.13  | 4 | 1  | 2  | 2  | 1.664 | 0.973 | 0.612 | 0.504 | 0.00   | 4.13  | 2  | 2  | 775   | 83.6 | 8.07 |
| P40121 | Macrophage-capping protein<br>OS=Homo sapiens<br>GN=CAPG<br>PE=1 SV=2 - [CAPG_HUMAN]                             | 42.24 | 1 | 13 | 13 | 49 | 0.629 | 2.886 | 1.204 | 0.505 | 121.70 | 42.24 | 21 | 49 | 348   | 38.5 | 6.19 |
| Q8WV93 | Lactation elevated protein 1<br>OS=Homo sapiens<br>GN=LACE1<br>PE=2 SV=2 - [LACE1_HUMAN]                         | 4.78  | 1 | 2  | 2  | 2  | 0.614 | 0.166 | 0.428 | 0.505 | 4.58   | 4.78  | 2  | 2  | 481   | 54.8 | 7.27 |
| A0MZ66 | Shootin-1<br>OS=Homo sapiens<br>GN=KIAA1598<br>PE=1 SV=4 - [SHOT1_HUMAN]                                         | 3.01  | 1 | 2  | 2  | 5  | 1.317 | 1.116 | 0.625 | 0.506 | 12.79  | 3.01  | 3  | 5  | 631   | 71.6 | 5.33 |

|        |                                                                                                            |       |   |    |    |     |       |       |       |       |         |       |    |     |      |       |      |
|--------|------------------------------------------------------------------------------------------------------------|-------|---|----|----|-----|-------|-------|-------|-------|---------|-------|----|-----|------|-------|------|
| Q9UMS6 | Synaptopodin-2<br>OS=Homo sapiens<br>GN=SYNPO2<br>PE=1 SV=2 - [SYNP2_HUMAN]                                | 34.86 | 2 | 37 | 37 | 271 | 0.621 | 1.493 | 2.147 | 0.507 | 531.35  | 34.86 | 63 | 271 | 1093 | 117.4 | 8.57 |
| Q8TE73 | Dynein heavy chain 5, axonemal<br>OS=Homo sapiens<br>GN=DNAH5<br>PE=1 SV=3 - [DYH5_HUMAN]                  | 1.69  | 1 | 6  | 7  | 10  | 0.940 | 1.030 | 1.382 | 0.507 | 17.07   | 1.69  | 7  | 10  | 4624 | 528.7 | 6.10 |
| Q96NY9 | Crossover junction endonuclease<br>MUS81<br>OS=Homo sapiens<br>GN=MUS81<br>PE=1 SV=3 - [MUS81_HUMAN]       | 9.44  | 1 | 2  | 2  | 2   | 0.955 | 0.923 | 1.077 | 0.508 | 0.00    | 9.44  | 2  | 2   | 551  | 61.1  | 9.73 |
| Q96MT0 | Putative uncharacterized protein<br>FLJ31958<br>OS=Homo sapiens<br>PE=2 SV=1 - [YJ006_HUMAN]               | 6.75  | 1 | 1  | 1  | 2   | 0.677 | 0.551 | 0.717 | 0.511 | 4.76    | 6.75  | 1  | 2   | 163  | 17.0  | 5.45 |
| P45877 | Peptidyl-prolyl isomerase C<br>OS=Homo sapiens<br>GN=PPIC<br>PE=1 SV=1 - [PPIC_HUMAN]                      | 34.91 | 1 | 5  | 6  | 62  | 0.680 | 0.722 | 0.769 | 0.511 | 138.45  | 34.91 | 8  | 62  | 212  | 22.7  | 8.40 |
| P54760 | Ephrin type-B receptor 4<br>OS=Homo sapiens<br>GN=EPHB4<br>PE=1 SV=2 - [EPHB4_HUMAN]                       | 4.05  | 8 | 2  | 4  | 6   | 0.967 | 1.184 | 1.295 | 0.511 | 13.16   | 4.05  | 5  | 6   | 987  | 108.2 | 6.90 |
| Q9HAF1 | Chromatin modification-related protein<br>MEAF6<br>OS=Homo sapiens<br>GN=MEAF6<br>PE=1 SV=1 - [EAF6_HUMAN] | 12.04 | 1 | 2  | 2  | 4   | 1.460 | 1.129 | 1.082 | 0.513 | 6.82    | 12.04 | 2  | 4   | 191  | 21.6  | 9.32 |
| Q02952 | A-kinase anchor protein 12<br>OS=Homo sapiens<br>GN=AKAP12<br>PE=1 SV=4 - [AKA12_HUMAN]                    | 40.46 | 1 | 55 | 55 | 358 | 0.673 | 1.234 | 1.085 | 0.514 | 1070.16 | 40.46 | 91 | 358 | 1782 | 191.4 | 4.41 |
| Q86Z20 | Coiled-coil domain-containing protein 125<br>OS=Homo sapiens<br>GN=CCDC125<br>PE=1 SV=2 - [CC125_HUMAN]    | 3.91  | 1 | 1  | 2  | 2   | 0.965 | 0.557 | 1.166 | 0.514 | 1.74    | 3.91  | 2  | 2   | 511  | 58.6  | 7.24 |



|        |                                                                                                  |       |   |    |    |     |       |       |       |       |        |       |    |     |      |       |      |
|--------|--------------------------------------------------------------------------------------------------|-------|---|----|----|-----|-------|-------|-------|-------|--------|-------|----|-----|------|-------|------|
| Q14558 | Heat shock protein beta-6<br>OS=Homo sapiens<br>GN=HSPB6<br>PE=1 SV=2 - [HSPB6_HUMAN]            | 61.25 | 1 | 6  | 6  | 66  | 0.328 | 2.588 | 1.620 | 0.515 | 162.77 | 61.25 | 11 | 66  | 160  | 17.1  | 6.40 |
| Q6AWC2 | Protein WWC2<br>OS=Homo sapiens<br>GN=WWC2<br>PE=1 SV=2 - [WWC2_HUMAN]                           | 6.04  | 1 | 6  | 6  | 10  | 1.104 | 0.402 | 0.792 | 0.515 | 18.28  | 6.04  | 8  | 10  | 1192 | 133.8 | 5.53 |
| P62837 | Ubiquitin-conjugating enzyme E2 D2<br>OS=Homo sapiens<br>GN=UBE2D2<br>PE=1 SV=1 - [UBE2D2_HUMAN] | 4.76  | 1 | 1  | 1  | 10  | 0.840 | 0.622 | 0.460 | 0.515 | 18.48  | 4.76  | 2  | 10  | 147  | 16.7  | 7.83 |
| P18085 | ADP-ribosylation factor 4<br>OS=Homo sapiens<br>GN=ARF4<br>PE=1 SV=3 - [ARF4_HUMAN]              | 44.44 | 2 | 4  | 8  | 107 | 0.453 | 0.369 | 0.498 | 0.517 | 207.78 | 44.44 | 15 | 107 | 180  | 20.5  | 7.14 |
| Q9BUD6 | Spondin-2<br>OS=Homo sapiens<br>GN=SPON2<br>PE=1 SV=3 - [SPON2_HUMAN]                            | 2.42  | 1 | 1  | 1  | 5   | 0.597 | 0.299 | 0.836 | 0.517 | 12.16  | 2.42  | 2  | 5   | 331  | 35.8  | 5.52 |
| P51513 | RNA-binding protein Nova-1<br>OS=Homo sapiens<br>GN=NOVA1<br>PE=1 SV=1 - [NOVA1_HUMAN]           | 5.49  | 1 | 1  | 2  | 3   | 0.443 | 2.226 | 1.543 | 0.518 | 7.25   | 5.49  | 3  | 3   | 510  | 52.0  | 8.88 |
| Q8TCC7 | Solute carrier family 22 member 8<br>OS=Homo sapiens<br>GN=SLC22A8<br>PE=1 SV=1 - [S22A8_HUMAN]  | 1.29  | 1 | 1  | 1  | 1   | 0.290 | 0.462 | 0.719 | 0.519 | 2.63   | 1.29  | 1  | 1   | 542  | 59.8  | 8.85 |
| Q86TX2 | Acyl-coenzyme A thioesterase 1<br>OS=Homo sapiens<br>GN=ACOT1<br>PE=1 SV=1 - [ACOT1_HUMAN]       | 33.73 | 2 | 13 | 13 | 77  | 0.670 | 1.078 | 1.101 | 0.519 | 209.28 | 33.73 | 22 | 77  | 421  | 46.2  | 7.34 |
| Q9HBS4 | Thiamin pyrophosphokinase 1<br>OS=Homo sapiens<br>GN=TPK1<br>PE=1 SV=1 - [TPK1_HUMAN]            | 3.70  | 1 | 1  | 1  | 4   | 0.547 | 0.805 | 0.836 | 0.521 | 6.96   | 3.70  | 2  | 4   | 243  | 27.2  | 5.20 |

|        |                                                                                                    |       |   |   |   |    |       |       |       |       |       |       |    |    |     |      |      |
|--------|----------------------------------------------------------------------------------------------------|-------|---|---|---|----|-------|-------|-------|-------|-------|-------|----|----|-----|------|------|
| Q06136 | 3-ketodihydrospingosine reductase<br>OS=Homo sapiens<br>GN=KDSR<br>PE=1 SV=1 - [KDSR_HUMAN]        | 7.83  | 1 | 2 | 2 | 4  | 0.405 | 1.225 | 0.666 | 0.521 | 9.19  | 7.83  | 2  | 4  | 332 | 36.2 | 7.12 |
| O43556 | Epsilon-sarcoglycan<br>OS=Homo sapiens<br>GN=SGCE<br>PE=1 SV=6 - [SGCE_HUMAN]                      | 8.24  | 1 | 2 | 2 | 7  | 1.255 | 0.544 | 0.724 | 0.522 | 15.31 | 8.24  | 4  | 7  | 437 | 49.8 | 6.55 |
| Q9H3G5 | Probable serine carboxypeptidase CPVL<br>OS=Homo sapiens<br>GN=CPVL PE=1 SV=2 - [CPVL_HUMAN]       | 2.73  | 1 | 1 | 1 | 1  | 0.802 | 0.703 | 0.803 | 0.522 | 1.86  | 2.73  | 1  | 1  | 476 | 54.1 | 5.62 |
| Q92466 | DNA damage-binding protein 2<br>OS=Homo sapiens<br>GN=DDB2<br>PE=1 SV=1 - [DDB2_HUMAN]             | 4.92  | 1 | 2 | 2 | 9  | 2.283 | 1.616 | 1.343 | 0.524 | 21.28 | 4.92  | 4  | 9  | 427 | 47.8 | 9.47 |
| P48509 | CD151 antigen<br>OS=Homo sapiens<br>GN=CD151<br>PE=1 SV=3 - [CD151_HUMAN]                          | 12.65 | 1 | 4 | 4 | 10 | 0.681 | 0.779 | 0.904 | 0.524 | 20.32 | 12.65 | 6  | 10 | 253 | 28.3 | 7.47 |
| O14734 | Acyl-coenzyme A thioesterase 8<br>OS=Homo sapiens<br>GN=ACOT8<br>PE=1 SV=1 - [ACOT8_HUMAN]         | 13.79 | 1 | 4 | 4 | 6  | 0.639 | 0.946 | 1.068 | 0.524 | 8.66  | 13.79 | 6  | 6  | 319 | 35.9 | 7.56 |
| Q15113 | Procollagen C-endopeptidase enhancer 1<br>OS=Homo sapiens<br>GN=PCOLCE<br>PE=1 SV=2 - [PCO1_HUMAN] | 23.39 | 1 | 8 | 8 | 25 | 0.568 | 0.928 | 1.143 | 0.525 | 73.12 | 23.39 | 13 | 25 | 449 | 47.9 | 7.43 |
| Q8TDS4 | Hydroxycarboxylic acid receptor 2<br>OS=Homo sapiens<br>GN=HCAR2<br>PE=1 SV=1 - [HCAR2_HUMAN]      | 2.20  | 2 | 1 | 1 | 1  | 0.791 | 0.292 | 0.553 | 0.525 | 1.88  | 2.20  | 1  | 1  | 363 | 41.8 | 9.11 |
| Q8IYB0 | Putative uncharacterized protein MGC39545<br>OS=Homo sapiens<br>PE=5 SV=2 - [YK038_HUMAN]          | 10.20 | 1 | 1 | 1 | 1  | 0.654 | 1.987 | 4.752 | 0.526 | 2.94  | 10.20 | 1  | 1  | 196 | 21.2 | 9.76 |

|        |                                                                                                                       |       |   |    |    |     |       |       |       |       |         |       |    |     |      |       |       |
|--------|-----------------------------------------------------------------------------------------------------------------------|-------|---|----|----|-----|-------|-------|-------|-------|---------|-------|----|-----|------|-------|-------|
| Q16821 | Protein phosphatase 1 regulatory subunit 3A<br>OS=Homo sapiens<br>GN=PPP1R3A<br>PE=1 SV=3 - [PPR3A_HUMAN]             | 2.41  | 1 | 2  | 2  | 2   | 0.336 | 0.355 | 0.561 | 0.526 | 2.42    | 2.41  | 2  | 2   | 1122 | 125.7 | 5.00  |
| P13473 | Lysosome-associated membrane glycoprotein 2<br>OS=Homo sapiens<br>GN=LAMP2<br>PE=1 SV=2 - [LAMP2_HUMAN]               | 9.27  | 1 | 4  | 4  | 20  | 0.689 | 0.561 | 0.500 | 0.526 | 42.35   | 9.27  | 7  | 20  | 410  | 44.9  | 5.63  |
| P50454 | Serpin H1<br>OS=Homo sapiens<br>GN=SERPINH1<br>PE=1 SV=2 - [SERPH_HUMAN]                                              | 60.29 | 1 | 27 | 27 | 537 | 0.480 | 0.701 | 0.738 | 0.527 | 1349.02 | 60.29 | 45 | 537 | 418  | 46.4  | 8.69  |
| Q99757 | Thioredoxin, mitochondrial<br>OS=Homo sapiens<br>GN=TXN2<br>PE=1 SV=2 - [THIOM_HUMAN]                                 | 9.04  | 1 | 1  | 1  | 1   | 0.324 | 1.033 | 0.341 | 0.528 | 3.09    | 9.04  | 1  | 1   | 166  | 18.4  | 8.29  |
| P12109 | Collagen alpha-1(VI) chain<br>OS=Homo sapiens<br>GN=COL6A1<br>PE=1 SV=3 - [CO6A1_HUMAN]                               | 44.16 | 1 | 36 | 36 | 370 | 0.625 | 1.020 | 1.478 | 0.529 | 1022.46 | 44.16 | 58 | 370 | 1028 | 108.5 | 5.43  |
| Q9ULW8 | Protein-arginine deiminase type-3<br>OS=Homo sapiens<br>GN=PADI3<br>PE=1 SV=2 - [PADI3_HUMAN]                         | 2.26  | 1 | 1  | 1  | 1   | 1.093 | 0.623 | 1.070 | 0.529 | 3.02    | 2.26  | 1  | 1   | 664  | 74.7  | 5.54  |
| Q9HAM7 | Pleckstrin homology domain-containing family A member 4<br>OS=Homo sapiens<br>GN=PLEKHA4<br>PE=1 SV=2 - [PKHA4_HUMAN] | 7.32  | 1 | 3  | 3  | 4   | 1.448 | 1.296 | 2.045 | 0.530 | 7.75    | 7.32  | 3  | 4   | 779  | 85.3  | 10.56 |
| Q9UIX5 | Anaphase-promoting complex subunit 4<br>OS=Homo sapiens<br>GN=ANAPC4<br>PE=1 SV=2 - [APC4_HUMAN]                      | 0.87  | 1 | 1  | 1  | 1   | 1.111 | 1.049 | 0.719 | 0.530 | 1.92    | 0.87  | 1  | 1   | 808  | 92.1  | 5.53  |

|        |                                                                                                                  |       |   |   |   |    |       |       |       |       |        |       |    |    |      |       |      |
|--------|------------------------------------------------------------------------------------------------------------------|-------|---|---|---|----|-------|-------|-------|-------|--------|-------|----|----|------|-------|------|
| P38571 | Lysosomal acid lipase/cholesterol ester hydrolase<br>OS=Homo sapiens<br>GN=LIPA PE=1 SV=2 - [LIPA_HUMAN]         | 6.77  | 1 | 2 | 2 | 4  | 0.725 | 1.153 | 0.921 | 0.530 | 8.13   | 6.77  | 3  | 4  | 399  | 45.4  | 6.92 |
| Q96Q04 | Serine/threonine-protein kinase LMTK3<br>OS=Homo sapiens<br>GN=LMTK3 PE=2 SV=2 - [LMTK3_HUMAN]                   | 2.26  | 1 | 1 | 1 | 1  | 1.182 | 1.009 | 0.781 | 0.531 | 3.23   | 2.26  | 1  | 1  | 1460 | 153.6 | 4.86 |
| Q5U5X0 | Complex III assembly factor LYRM7<br>OS=Homo sapiens<br>GN=LYRM7 PE=1 SV=1 - [LYRM7_HUMAN]                       | 20.19 | 2 | 1 | 2 | 8  | 0.880 | 0.667 | 0.587 | 0.531 | 4.86   | 20.19 | 2  | 8  | 104  | 11.9  | 9.66 |
| Q8TC84 | Fibronectin type 3 and ankyrin repeat domains protein 1<br>OS=Homo sapiens<br>GN=FANK1 PE=2 SV=3 - [FANK1_HUMAN] | 3.48  | 1 | 1 | 1 | 1  | 0.549 | 0.539 | 0.681 | 0.532 | 2.43   | 3.48  | 1  | 1  | 345  | 38.3  | 8.73 |
| P23142 | Fibulin-1<br>OS=Homo sapiens<br>GN=FBLN1 PE=1 SV=4 - [FBLN1_HUMAN]                                               | 4.41  | 1 | 3 | 3 | 5  | 0.421 | 2.960 | 1.233 | 0.533 | 13.26  | 4.41  | 5  | 5  | 703  | 77.2  | 5.22 |
| Q7Z388 | Probable C-mannosyltransferase DPY19L4<br>OS=Homo sapiens<br>GN=DPY19L4 PE=1 SV=1 - [DPY19L4_HUMAN]              | 0.97  | 1 | 1 | 1 | 1  | 0.918 | 0.820 | 0.974 | 0.533 | 2.13   | 0.97  | 1  | 1  | 723  | 83.7  | 8.16 |
| P45381 | Aspartoacylase<br>OS=Homo sapiens<br>GN=ASPA PE=1 SV=1 - [ACY2_HUMAN]                                            | 4.15  | 1 | 1 | 1 | 2  | 0.653 | 0.298 | 0.370 | 0.535 | 2.92   | 4.15  | 2  | 2  | 313  | 35.7  | 6.52 |
| Q96RT6 | cTAGE family member 2<br>OS=Homo sapiens<br>GN=CTAGE1 PE=1 SV=2 - [CTGE2_HUMAN]                                  | 7.25  | 2 | 1 | 6 | 21 | 0.565 | 0.933 | 1.303 | 0.536 | 36.62  | 7.25  | 7  | 21 | 745  | 85.2  | 6.16 |
| P13647 | Keratin, type II cytoskeletal 5<br>OS=Homo sapiens<br>GN=KRT5 PE=1 SV=3 - [K2C5_HUMAN]                           | 11.69 | 2 | 2 | 8 | 97 | 1.123 | 1.824 | 1.256 | 0.537 | 192.51 | 11.69 | 12 | 97 | 590  | 62.3  | 7.74 |

|        |                                                                                                             |       |   |   |   |    |       |       |       |       |        |       |   |    |      |       |      |
|--------|-------------------------------------------------------------------------------------------------------------|-------|---|---|---|----|-------|-------|-------|-------|--------|-------|---|----|------|-------|------|
| Q6PIJ6 | F-box only protein 38<br>OS=Homo sapiens<br>GN=FBXO38<br>PE=1 SV=3 - [FBX38_HUMAN]                          | 0.84  | 1 | 1 | 1 | 1  | 1.138 | 1.007 | 1.287 | 0.538 | 0.00   | 0.84  | 1 | 1  | 1188 | 133.9 | 6.33 |
| O14683 | Tumor protein p53-inducible protein 11<br>OS=Homo sapiens<br>GN=TP53I11<br>PE=1 SV=2 - [P5111_HUMAN]        | 22.22 | 1 | 4 | 4 | 37 | 0.624 | 0.669 | 0.945 | 0.538 | 127.09 | 22.22 | 7 | 37 | 189  | 21.0  | 9.55 |
| Q5JRM2 | Uncharacterized protein CXorf66<br>OS=Homo sapiens<br>GN=CXorf66<br>PE=2 SV=1 - [CX066_HUMAN]               | 4.99  | 1 | 1 | 1 | 4  | 0.749 | 1.066 | 0.971 | 0.539 | 0.00   | 4.99  | 1 | 4  | 361  | 39.9  | 9.54 |
| Q9UPS8 | Ankyrin repeat domain-containing protein 26<br>OS=Homo sapiens<br>GN=ANKRD26<br>PE=1 SV=3 - [ANR26_HUMAN]   | 1.99  | 1 | 3 | 4 | 7  | 1.085 | 1.072 | 0.912 | 0.539 | 16.82  | 1.99  | 5 | 7  | 1709 | 196.2 | 5.72 |
| Q8TAD4 | Zinc transporter 5<br>OS=Homo sapiens<br>GN=SLC30A5<br>PE=1 SV=1 - [ZNT5_HUMAN]                             | 0.78  | 1 | 1 | 1 | 1  | 0.521 | 0.604 | 0.702 | 0.541 | 2.47   | 0.78  | 1 | 1  | 765  | 84.0  | 7.31 |
| Q8IXL7 | Methionine-R-sulfoxide reductase B3<br>OS=Homo sapiens<br>GN=MSRB3<br>PE=1 SV=2 - [MSRB3_HUMAN]             | 18.75 | 1 | 4 | 4 | 13 | 0.636 | 0.850 | 1.057 | 0.544 | 24.23  | 18.75 | 8 | 13 | 192  | 20.7  | 7.33 |
| A6NNM8 | Tubulin polyglutamylase TTL13<br>OS=Homo sapiens<br>GN=TTL13<br>PE=2 SV=2 - [TTL13_HUMAN]                   | 0.86  | 1 | 1 | 1 | 12 | 0.675 | 0.946 | 2.221 | 0.544 | 22.92  | 0.86  | 2 | 12 | 815  | 93.6  | 8.91 |
| Q5H9U9 | Probable ATP-dependent RNA helicase DDX60-like<br>OS=Homo sapiens<br>GN=DDX60L<br>PE=2 SV=2 - [DDX6L_HUMAN] | 0.76  | 1 | 1 | 1 | 2  | 0.688 | 0.598 | 0.828 | 0.544 | 2.16   | 0.76  | 1 | 2  | 1706 | 197.5 | 8.29 |
| Q96EK6 | Glucosamine 6-phosphate N-acetyltransferase<br>OS=Homo sapiens<br>GN=GNPNAT1<br>PE=1 SV=1 - [GNA1_HUMAN]    | 45.11 | 1 | 6 | 6 | 10 | 0.466 | 0.854 | 0.800 | 0.544 | 32.26  | 45.11 | 9 | 10 | 184  | 20.7  | 7.99 |

|        |                                                                                                                          |       |   |     |     |     |       |       |       |       |         |       |     |     |      |       |      |
|--------|--------------------------------------------------------------------------------------------------------------------------|-------|---|-----|-----|-----|-------|-------|-------|-------|---------|-------|-----|-----|------|-------|------|
| O00462 | Beta-mannosidase<br>OS=Homo sapiens<br>GN=MANBA<br>PE=1 SV=3 - [MANBA_HUMAN]                                             | 9.33  | 1 | 7   | 8   | 12  | 0.651 | 0.641 | 0.755 | 0.546 | 26.14   | 9.33  | 10  | 12  | 879  | 100.8 | 5.52 |
| P49588 | Alanine--tRNA ligase, cytoplasmic<br>OS=Homo sapiens<br>GN=AARS<br>PE=1 SV=2 - [SYAC_HUMAN]                              | 54.03 | 2 | 46  | 48  | 248 | 0.697 | 0.914 | 0.856 | 0.546 | 572.67  | 54.03 | 75  | 248 | 968  | 106.7 | 5.53 |
| Q8WUJ3 | Cell migration-inducing and hyaluronan-binding protein<br>OS=Homo sapiens<br>GN=CEMIP<br>PE=1 SV=2 - [CEMIP_HUMAN]       | 39.31 | 1 | 47  | 47  | 185 | 0.470 | 0.501 | 0.619 | 0.547 | 438.18  | 39.31 | 80  | 185 | 1361 | 152.9 | 7.85 |
| Q8NI22 | Multiple coagulation factor deficiency protein 2<br>OS=Homo sapiens<br>GN=MCFD2<br>PE=1 SV=1 - [MCFD2_HUMAN]             | 28.08 | 1 | 2   | 2   | 2   | 0.593 | 0.439 | 0.696 | 0.547 | 8.97    | 28.08 | 2   | 2   | 146  | 16.4  | 4.63 |
| Q8M436 | Inactive carboxypeptidase-like protein X2<br>OS=Homo sapiens<br>GN=CPXM2<br>PE=2 SV=3 - [CPXM2_HUMAN]                    | 1.85  | 1 | 1   | 1   | 1   | 1.443 | 1.505 | 1.911 | 0.548 | 0.00    | 1.85  | 1   | 1   | 756  | 85.8  | 6.87 |
| P02511 | Alpha-crystallin B chain<br>OS=Homo sapiens<br>GN=CRYAB<br>PE=1 SV=2 - [CRYAB_HUMAN]                                     | 58.29 | 1 | 11  | 11  | 67  | 0.584 | 0.925 | 1.105 | 0.548 | 163.69  | 58.29 | 17  | 67  | 175  | 20.1  | 7.33 |
| Q71RG4 | Transmembrane and ubiquitin-like domain-containing protein 2<br>OS=Homo sapiens<br>GN=TMUB2<br>PE=2 SV=2 - [TMUB2_HUMAN] | 4.36  | 1 | 1   | 1   | 3   | 0.430 | 0.560 | 0.461 | 0.548 | 9.30    | 4.36  | 2   | 3   | 321  | 33.8  | 5.03 |
| P46821 | Microtubule-associated protein 1B<br>OS=Homo sapiens<br>GN=MAP1B<br>PE=1 SV=2 - [MAP1B_HUMAN]                            | 48.01 | 1 | 100 | 102 | 673 | 0.619 | 1.423 | 1.274 | 0.548 | 1841.61 | 48.01 | 165 | 673 | 2468 | 270.5 | 4.81 |

|        |                                                                                                                                                 |       |   |    |    |     |       |       |       |       |        |       |    |     |      |       |      |
|--------|-------------------------------------------------------------------------------------------------------------------------------------------------|-------|---|----|----|-----|-------|-------|-------|-------|--------|-------|----|-----|------|-------|------|
| Q6PRD1 | Probable G-protein coupled receptor 179<br>OS=Homo sapiens<br>GN=GPR179<br>PE=1 SV=2 - [GP179_HUMAN]                                            | 1.65  | 1 | 2  | 2  | 3   | 0.783 | 1.080 | 1.702 | 0.549 | 4.56   | 1.65  | 2  | 3   | 2367 | 257.2 | 5.71 |
| P13797 | Plastin-3<br>OS=Homo sapiens<br>GN=PLS3 PE=1<br>SV=4 - [PLST_HUMAN]                                                                             | 58.41 | 1 | 28 | 37 | 318 | 0.675 | 0.863 | 1.332 | 0.549 | 722.71 | 58.41 | 67 | 318 | 630  | 70.8  | 5.60 |
| H0Y354 | Protein FAM72C<br>OS=Homo sapiens<br>GN=FAM72C<br>PE=3 SV=2 - [FA72C_HUMAN]                                                                     | 10.07 | 2 | 1  | 1  | 1   | 1.198 | 0.825 | 1.296 | 0.549 | 0.00   | 10.07 | 1  | 1   | 149  | 16.7  | 6.68 |
| P23381 | Tryptophan--tRNA ligase, cytoplasmic<br>OS=Homo sapiens<br>GN=WARS<br>PE=1 SV=2 - [SYWC_HUMAN]                                                  | 46.28 | 1 | 26 | 26 | 213 | 1.047 | 0.589 | 0.585 | 0.550 | 579.60 | 46.28 | 42 | 213 | 471  | 53.1  | 6.23 |
| Q9Y4D1 | Disheveled-associated activator of morphogenesis 1<br>OS=Homo sapiens<br>GN=DAAM1<br>PE=1 SV=2 - [DAAM1_HUMAN]                                  | 1.86  | 1 | 2  | 2  | 2   | 0.624 | 1.472 | 1.119 | 0.550 | 2.44   | 1.86  | 2  | 2   | 1078 | 123.4 | 7.23 |
| O15054 | Lysine-specific demethylase 6B<br>OS=Homo sapiens<br>GN=KDM6B<br>PE=1 SV=4 - [KDM6B_HUMAN]                                                      | 7.12  | 1 | 3  | 4  | 6   | 0.703 | 2.141 | 1.338 | 0.551 | 4.39   | 7.12  | 4  | 6   | 1643 | 176.5 | 8.54 |
| P13995 | Bifunctional methylenetetrahydrofolate dehydrogenase /cydohydrolyase, mitochondrial<br>OS=Homo sapiens<br>GN=MTHFD2<br>PE=1 SV=2 - [MTDC_HUMAN] | 17.14 | 1 | 6  | 7  | 21  | 0.547 | 0.793 | 0.886 | 0.551 | 34.48  | 17.14 | 13 | 21  | 350  | 37.9  | 8.73 |
| P52294 | Importin subunit alpha-5<br>OS=Homo sapiens<br>GN=KPNA1<br>PE=1 SV=3 - [IMAS_HUMAN]                                                             | 16.73 | 1 | 4  | 9  | 20  | 0.640 | 0.986 | 0.990 | 0.552 | 45.03  | 16.73 | 12 | 20  | 538  | 60.2  | 5.01 |
| P29475 | Nitric oxide synthase, brain<br>OS=Homo sapiens<br>GN=NOS1<br>PE=1 SV=2 - [NOS1_HUMAN]                                                          | 1.67  | 1 | 2  | 2  | 2   | 0.203 | 0.766 | 1.478 | 0.552 | 2.01   | 1.67  | 2  | 2   | 1434 | 160.9 | 7.42 |

|        |                                                                                                                            |       |    |    |    |    |       |       |       |       |        |       |    |    |      |       |      |
|--------|----------------------------------------------------------------------------------------------------------------------------|-------|----|----|----|----|-------|-------|-------|-------|--------|-------|----|----|------|-------|------|
| A6NNF4 | Zinc finger protein 726<br>OS=Homo sapiens<br>GN=ZNF726<br>PE=2 SV=4 - [ZNF726_HUMAN]                                      | 13.55 | 94 | 2  | 3  | 6  | 1.356 | 0.152 | 0.309 | 0.552 | 2.14   | 13.55 | 3  | 6  | 738  | 85.5  | 9.09 |
| Q15043 | Zinc transporter ZIP14<br>OS=Homo sapiens<br>GN=SLC39A14<br>PE=1 SV=3 - [S39AE_HUMAN]                                      | 6.71  | 1  | 2  | 2  | 4  | 0.381 | 0.557 | 0.703 | 0.553 | 16.53  | 6.71  | 3  | 4  | 492  | 54.2  | 5.33 |
| P13612 | Integrin alpha-4<br>OS=Homo sapiens<br>GN=ITGA4<br>PE=1 SV=3 - [ITA4_HUMAN]                                                | 6.20  | 1  | 7  | 7  | 17 | 0.525 | 0.479 | 1.096 | 0.553 | 23.88  | 6.20  | 12 | 17 | 1032 | 114.8 | 6.48 |
| P0CW24 | Paraneoplastic antigen-like protein 6A<br>OS=Homo sapiens<br>GN=PNMA6A<br>PE=2 SV=1 - [PNM6A_HUMAN]                        | 1.50  | 2  | 1  | 1  | 1  | 0.694 | 0.765 | 0.832 | 0.553 | 0.00   | 1.50  | 1  | 1  | 399  | 44.0  | 5.38 |
| Q5XX13 | F-box/WD repeat-containing protein 10<br>OS=Homo sapiens<br>GN=FBXW10<br>PE=2 SV=2 - [FBW10_HUMAN]                         | 1.14  | 1  | 1  | 1  | 1  | 1.450 | 0.738 | 1.420 | 0.554 | 2.43   | 1.14  | 1  | 1  | 1052 | 119.8 | 9.39 |
| Q8N4P3 | Guanosine-3',5'-bis(diphosphate) 3'-pyrophosphohydrolase MESH1<br>OS=Homo sapiens<br>GN=HDDC3<br>PE=1 SV=3 - [MESH1_HUMAN] | 13.97 | 1  | 1  | 2  | 3  | 2.050 | 1.512 | 2.246 | 0.554 | 7.86   | 13.97 | 2  | 3  | 179  | 20.3  | 6.74 |
| P28676 | Grancalcn<br>OS=Homo sapiens<br>GN=GCA PE=1 SV=2 - [GRAN_HUMAN]                                                            | 8.29  | 1  | 2  | 2  | 4  | 1.176 | 3.165 | 1.810 | 0.555 | 10.45  | 8.29  | 3  | 4  | 217  | 24.0  | 5.21 |
| P98155 | Very low-density lipoprotein receptor<br>OS=Homo sapiens<br>GN=VLDLR<br>PE=1 SV=1 - [VLDLR_HUMAN]                          | 17.30 | 1  | 11 | 11 | 30 | 0.702 | 0.560 | 0.633 | 0.555 | 72.51  | 17.30 | 18 | 30 | 873  | 96.0  | 4.79 |
| O00425 | Insulin-like growth factor 2 mRNA-binding protein 3<br>OS=Homo sapiens<br>GN=IGF2BP3<br>PE=1 SV=2 - [IF2B3_HUMAN]          | 34.02 | 1  | 14 | 17 | 60 | 0.588 | 1.307 | 1.309 | 0.557 | 157.04 | 34.02 | 26 | 60 | 579  | 63.7  | 8.87 |



|        |                                                                                                                              |       |   |    |    |     |       |       |       |       |         |       |    |     |      |       |      |
|--------|------------------------------------------------------------------------------------------------------------------------------|-------|---|----|----|-----|-------|-------|-------|-------|---------|-------|----|-----|------|-------|------|
| Q06278 | Aldehyde oxidase<br>OS=Homo sapiens<br>GN=AOX1<br>PE=1 SV=2 - [AOXA_HUMAN]                                                   | 5.61  | 1 | 5  | 6  | 9   | 0.287 | 0.807 | 0.589 | 0.557 | 14.95   | 5.61  | 8  | 9   | 1338 | 147.8 | 7.17 |
| P35556 | Fibrillin-2<br>OS=Homo sapiens<br>GN=FBN2<br>PE=1 SV=3 - [FBN2_HUMAN]                                                        | 3.85  | 1 | 8  | 10 | 19  | 0.252 | 0.619 | 0.584 | 0.559 | 36.54   | 3.85  | 13 | 19  | 2912 | 314.6 | 4.86 |
| P13674 | Prolyl 4-hydroxylase subunit alpha-1<br>OS=Homo sapiens<br>GN=P4HA1<br>PE=1 SV=2 - [P4HA1_HUMAN]                             | 61.24 | 1 | 37 | 37 | 412 | 0.688 | 0.669 | 0.752 | 0.559 | 1209.28 | 61.24 | 59 | 412 | 534  | 61.0  | 6.01 |
| Q9ULG6 | Cell cycle progression protein 1<br>OS=Homo sapiens<br>GN=CCPG1<br>PE=2 SV=3 - [CCPG1_HUMAN]                                 | 4.36  | 4 | 3  | 5  | 6   | 0.602 | 0.714 | 0.708 | 0.560 | 11.71   | 4.36  | 6  | 6   | 757  | 87.3  | 5.95 |
| Q9BV19 | Uncharacterized protein C1orf50<br>OS=Homo sapiens<br>GN=C1orf50<br>PE=1 SV=2 - [CA050_HUMAN]                                | 6.53  | 1 | 1  | 1  | 2   | 0.668 | 1.593 | 1.000 | 0.560 | 2.33    | 6.53  | 2  | 2   | 199  | 21.9  | 5.88 |
| P09619 | Platelet-derived growth factor receptor beta<br>OS=Homo sapiens<br>GN=PDGFRB<br>PE=1 SV=1 - [PGFRB_HUMAN]                    | 21.25 | 5 | 18 | 19 | 74  | 0.658 | 0.630 | 0.723 | 0.560 | 215.74  | 21.25 | 35 | 74  | 1106 | 123.9 | 4.98 |
| P05121 | Plasminogen activator inhibitor 1<br>OS=Homo sapiens<br>GN=SERPINE1<br>PE=1 SV=1 - [PAI1_HUMAN]                              | 17.66 | 1 | 7  | 7  | 22  | 0.192 | 0.456 | 1.017 | 0.560 | 48.43   | 17.66 | 12 | 22  | 402  | 45.0  | 7.20 |
| P22413 | Ectonucleotide pyrophosphatase/phosphodiesterase family member 1<br>OS=Homo sapiens<br>GN=ENPP1<br>PE=1 SV=2 - [ENPP1_HUMAN] | 0.76  | 1 | 1  | 1  | 1   | 0.913 | 2.501 | 1.477 | 0.561 | 2.22    | 0.76  | 1  | 1   | 925  | 104.9 | 7.14 |
| Q6DKJ4 | Nucleoredoxin<br>OS=Homo sapiens<br>GN=NXN<br>PE=1 SV=2 - [NXN_HUMAN]                                                        | 29.20 | 1 | 11 | 11 | 29  | 0.778 | 1.031 | 1.246 | 0.561 | 86.55   | 29.20 | 16 | 29  | 435  | 48.4  | 4.97 |

|        |                                                                                                       |       |   |    |    |      |       |       |       |       |         |       |    |      |      |       |      |
|--------|-------------------------------------------------------------------------------------------------------|-------|---|----|----|------|-------|-------|-------|-------|---------|-------|----|------|------|-------|------|
| Q07092 | Collagen alpha-1(XVI) chain<br>OS=Homo sapiens<br>GN=COL16A1<br>PE=1 SV=2 - [COGA1_HUMAN]             | 4.11  | 1 | 5  | 5  | 19   | 0.344 | 0.894 | 0.743 | 0.562 | 36.69   | 4.11  | 9  | 19   | 1604 | 157.7 | 7.84 |
| P50135 | Histamine N-methyltransferase<br>OS=Homo sapiens<br>GN=HNMT<br>PE=1 SV=1 - [HNMT_HUMAN]               | 10.62 | 1 | 3  | 3  | 6    | 1.537 | 1.538 | 0.625 | 0.562 | 14.13   | 10.62 | 5  | 6    | 292  | 33.3  | 5.34 |
| Q9NSU2 | Three-prime repair exonuclease 1<br>OS=Homo sapiens<br>GN=TREX1<br>PE=1 SV=1 - [TREX1_HUMAN]          | 4.34  | 1 | 1  | 1  | 1    | 0.964 | 0.916 | 1.125 | 0.562 | 0.00    | 4.34  | 1  | 1    | 369  | 38.9  | 8.41 |
| P07355 | Annexin A2<br>OS=Homo sapiens<br>GN=ANKA2<br>PE=1 SV=2 - [ANKA2_HUMAN]                                | 80.24 | 2 | 38 | 38 | 1417 | 0.988 | 1.012 | 1.129 | 0.562 | 3745.74 | 80.24 | 65 | 1417 | 339  | 38.6  | 7.75 |
| Q01484 | Ankyrin-2<br>OS=Homo sapiens<br>GN=ANK2<br>PE=1 SV=4 - [ANK2_HUMAN]                                   | 3.31  | 1 | 8  | 10 | 24   | 0.411 | 1.047 | 1.194 | 0.562 | 68.72   | 3.31  | 18 | 24   | 3957 | 433.4 | 5.14 |
| A6NLD5 | Protein FAM74A7<br>OS=Homo sapiens<br>GN=FAM74A7<br>PE=3 SV=3 - [F74A7_HUMAN]                         | 6.29  | 2 | 1  | 1  | 2    | 0.888 | 1.344 | 1.630 | 0.562 | 2.31    | 6.29  | 1  | 2    | 159  | 18.3  | 9.54 |
| Q7Z398 | Zinc finger protein 550<br>OS=Homo sapiens<br>GN=ZNF550<br>PE=2 SV=2 - [ZNF550_HUMAN]                 | 3.32  | 1 | 1  | 1  | 1    | 1.180 | 1.211 | 0.827 | 0.563 | 0.00    | 3.32  | 1  | 1    | 422  | 48.4  | 8.63 |
| Q9NXZ2 | Probable ATP-dependent RNA helicase DDX43<br>OS=Homo sapiens<br>GN=DDX43<br>PE=2 SV=2 - [DDX43_HUMAN] | 2.93  | 1 | 1  | 2  | 2    | 0.564 | 0.324 |       | 0.564 | 4.41    | 2.93  | 2  | 2    | 648  | 72.8  | 8.75 |
| Q9H425 | Uncharacterized protein C1orf198<br>OS=Homo sapiens<br>GN=C1orf198<br>PE=1 SV=1 - [CA198_HUMAN]       | 59.02 | 1 | 14 | 14 | 50   | 1.124 | 0.449 | 1.145 | 0.564 | 137.21  | 59.02 | 21 | 50   | 327  | 36.3  | 5.72 |

|        |                                                                                                      |       |   |     |     |     |       |       |       |       |         |       |     |     |      |       |      |
|--------|------------------------------------------------------------------------------------------------------|-------|---|-----|-----|-----|-------|-------|-------|-------|---------|-------|-----|-----|------|-------|------|
| P61457 | Pterin-4-alpha-carbinolamine dehydratase<br>OS=Homo sapiens<br>GN=PCBD1<br>PE=1 SV=2 - [PHS_HUMAN]   | 50.96 | 1 | 5   | 6   | 36  | 0.724 | 0.636 | 0.656 | 0.565 | 78.76   | 50.96 | 12  | 36  | 104  | 12.0  | 6.80 |
| O14732 | Inositol monophosphatase 2<br>OS=Homo sapiens<br>GN=IMPA2<br>PE=1 SV=1 - [IMPA2_HUMAN]               | 24.31 | 1 | 6   | 6   | 18  | 0.568 | 0.907 | 0.896 | 0.565 | 48.22   | 24.31 | 9   | 18  | 288  | 31.3  | 6.61 |
| P35442 | Thrombospondin-2 OS=Homo sapiens<br>GN=THBS2<br>PE=1 SV=2 - [TSP2_HUMAN]                             | 6.31  | 1 | 5   | 6   | 21  | 0.692 | 0.995 | 0.675 | 0.565 | 51.97   | 6.31  | 9   | 21  | 1172 | 129.9 | 4.83 |
| Q8TDX7 | Serine/threonine-protein kinase Nek7<br>OS=Homo sapiens<br>GN=NEK7<br>PE=1 SV=1 - [NEK7_HUMAN]       | 40.40 | 1 | 8   | 11  | 50  | 0.832 | 0.923 | 0.930 | 0.566 | 113.69  | 40.40 | 18  | 50  | 302  | 34.5  | 8.25 |
| P09488 | Glutathione S-transferase Mu 1 OS=Homo sapiens<br>GN=GSTM1<br>PE=1 SV=3 - [GSTM1_HUMAN]              | 58.72 | 1 | 1   | 16  | 130 | 0.480 | 0.087 | 0.380 | 0.566 | 344.04  | 58.72 | 25  | 130 | 218  | 25.7  | 6.70 |
| O95864 | Fatty acid desaturase 2<br>OS=Homo sapiens<br>GN=FADS2<br>PE=1 SV=1 - [FADS2_HUMAN]                  | 8.78  | 1 | 3   | 4   | 20  | 0.674 | 0.715 | 1.066 | 0.566 | 45.56   | 8.78  | 6   | 20  | 444  | 52.2  | 8.82 |
| P52952 | Homeobox protein Nkx-2.5<br>OS=Homo sapiens<br>GN=NKX2-5<br>PE=1 SV=1 - [NKX25_HUMAN]                | 3.09  | 1 | 1   | 1   | 1   | 0.678 | 0.238 | 0.585 | 0.566 | 1.76    | 3.09  | 1   | 1   | 324  | 34.9  | 9.38 |
| Q99715 | Collagen alpha-1(XII) chain<br>OS=Homo sapiens<br>GN=COL12A1<br>PE=1 SV=2 - [COCA1_HUMAN]            | 41.69 | 1 | 108 | 108 | 571 | 1.176 | 0.533 | 0.868 | 0.567 | 1394.20 | 41.69 | 185 | 571 | 3063 | 332.9 | 5.53 |
| O14717 | tRNA (cytosine(38)-C(5))-methyltransferase OS=Homo sapiens<br>GN=TRDMT1<br>PE=1 SV=1 - [TRDMT_HUMAN] | 3.07  | 1 | 1   | 1   | 1   | 0.634 |       |       | 0.567 | 3.67    | 3.07  | 1   | 1   | 391  | 44.6  | 6.09 |

|        |                                                                                               |       |   |    |    |    |       |       |       |       |        |       |    |    |      |       |      |
|--------|-----------------------------------------------------------------------------------------------|-------|---|----|----|----|-------|-------|-------|-------|--------|-------|----|----|------|-------|------|
| Q16222 | UDP-N-acetylhexosamine pyrophosphorylase OS=Homo sapiens GN=UAP1 PE=1 SV=3 - [UAP1_HUMAN]     | 22.03 | 1 | 11 | 11 | 41 | 0.462 | 0.710 | 0.927 | 0.567 | 91.05  | 22.03 | 18 | 41 | 522  | 58.7  | 6.33 |
| Q9UNN8 | Endothelial protein C receptor OS=Homo sapiens GN=PROCR PE=1 SV=1 - [EPCR_HUMAN]              | 5.46  | 1 | 1  | 1  | 1  | 1.286 | 1.214 | 0.295 | 0.567 | 6.20   | 5.46  | 1  | 1  | 238  | 26.7  | 7.18 |
| Q16832 | Discoidin domain-containing receptor 2 OS=Homo sapiens GN=DDR2 PE=1 SV=2 - [DDR2_HUMAN]       | 14.27 | 1 | 9  | 9  | 44 | 0.594 | 1.304 | 0.940 | 0.567 | 96.23  | 14.27 | 17 | 44 | 855  | 96.7  | 5.36 |
| Q12841 | Follistatin-related protein 1 OS=Homo sapiens GN=FSTL1 PE=1 SV=1 - [FSTL1_HUMAN]              | 44.48 | 1 | 16 | 16 | 56 | 0.637 | 0.457 | 0.580 | 0.567 | 130.91 | 44.48 | 27 | 56 | 308  | 35.0  | 5.52 |
| Q2M3G0 | ATP-binding cassette sub-family B member 5 OS=Homo sapiens GN=ABCB5 PE=1 SV=4 - [ABCB5_HUMAN] | 0.95  | 1 | 1  | 1  | 1  | 0.668 | 0.519 | 0.444 | 0.568 | 0.00   | 0.95  | 1  | 1  | 1257 | 138.6 | 7.53 |
| P53985 | Monocarboxylate transporter 1 OS=Homo sapiens GN=SLC16A1 PE=1 SV=3 - [MOT1_HUMAN]             | 6.40  | 1 | 2  | 2  | 8  | 0.455 | 0.840 | 0.668 | 0.568 | 26.09  | 6.40  | 3  | 8  | 500  | 53.9  | 8.66 |
| Q16585 | Beta-sarcoglycan OS=Homo sapiens GN=SGCB PE=1 SV=1 - [SGCB_HUMAN]                             | 29.56 | 1 | 6  | 6  | 27 | 1.124 | 0.353 | 0.629 | 0.569 | 68.37  | 29.56 | 11 | 27 | 318  | 34.8  | 8.62 |
| P78381 | UDP-galactose translocator OS=Homo sapiens GN=SLC35A2 PE=1 SV=1 - [S35A2_HUMAN]               | 3.54  | 1 | 1  | 1  | 1  | 1.647 | 0.191 | 1.355 | 0.569 | 0.00   | 3.54  | 1  | 1  | 396  | 41.3  | 9.96 |
| P15924 | Desmoplakin OS=Homo sapiens GN=DSP PE=1 SV=3 - [DESP_HUMAN]                                   | 3.17  | 1 | 7  | 11 | 20 | 0.557 | 0.718 | 0.763 | 0.570 | 34.33  | 3.17  | 13 | 20 | 2871 | 331.6 | 6.81 |

|        |                                                                                                                                 |       |   |    |    |    |       |       |       |       |        |       |    |    |     |       |      |
|--------|---------------------------------------------------------------------------------------------------------------------------------|-------|---|----|----|----|-------|-------|-------|-------|--------|-------|----|----|-----|-------|------|
| Q8IXT1 | DNA damage-induced apoptosis suppressor protein<br>OS=Homo sapiens<br>GN=DDIAS<br>PE=2 SV=2 - [DDIAS_HUMAN]                     | 0.70  | 1 | 1  | 1  | 2  | 0.955 | 1.362 | 0.775 | 0.570 | 3.99   | 0.70  | 1  | 2  | 998 | 111.5 | 7.18 |
| Q9BQI7 | PH and SEC7 domain-containing protein 2<br>OS=Homo sapiens<br>GN=PSD2<br>PE=2 SV=3 - [PSD2_HUMAN]                               | 0.78  | 1 | 1  | 1  | 1  | 0.958 | 1.179 | 1.278 | 0.571 | 0.00   | 0.78  | 1  | 1  | 771 | 84.6  | 5.19 |
| Q9NZP8 | Complement C1r subcomponent-like protein<br>OS=Homo sapiens<br>GN=C1RL PE=1 SV=2 - [C1RL_HUMAN]                                 | 1.64  | 1 | 1  | 1  | 2  | 1.529 | 3.191 | 1.335 | 0.571 | 5.21   | 1.64  | 2  | 2  | 487 | 53.5  | 7.20 |
| P29017 | T-cell surface glycoprotein CD1c<br>OS=Homo sapiens<br>GN=CD1C<br>PE=1 SV=2 - [CD1C_HUMAN]                                      | 5.11  | 1 | 2  | 2  | 3  | 1.058 | 1.002 | 1.140 | 0.572 | 0.00   | 5.11  | 2  | 3  | 333 | 37.6  | 6.14 |
| Q8N7R7 | Cylin-Y-like protein 1<br>OS=Homo sapiens<br>GN=CCNYL1<br>PE=1 SV=2 - [CCYL1_HUMAN]                                             | 6.96  | 1 | 2  | 3  | 6  | 0.839 | 1.157 | 0.763 | 0.572 | 15.42  | 6.96  | 4  | 6  | 359 | 40.7  | 6.07 |
| Q9H6S3 | Epidermal growth factor receptor kinase substrate 8-like protein 2<br>OS=Homo sapiens<br>GN=EPS8L2<br>PE=1 SV=2 - [ES8L2_HUMAN] | 32.17 | 1 | 18 | 18 | 71 | 0.797 | 0.891 | 0.794 | 0.572 | 181.72 | 32.17 | 28 | 71 | 715 | 80.6  | 6.84 |
| Q96EN8 | Molybdenum cofactor sulfurase<br>OS=Homo sapiens<br>GN=MOCOS<br>PE=1 SV=2 - [MOCOS_HUMAN]                                       | 2.48  | 1 | 2  | 2  | 9  | 0.413 | 0.683 | 0.538 | 0.573 | 17.47  | 2.48  | 4  | 9  | 888 | 98.1  | 6.70 |
| Q9NWM8 | Peptidyl-prolyl cis-trans isomerase FKBP14<br>OS=Homo sapiens<br>GN=FKBP14<br>PE=1 SV=1 - [FKB14_HUMAN]                         | 37.44 | 1 | 6  | 6  | 27 | 0.640 | 0.686 | 0.832 | 0.573 | 67.75  | 37.44 | 9  | 27 | 211 | 24.2  | 6.07 |

|        |                                                                                                                       |       |   |    |    |     |       |       |       |       |        |       |    |     |      |       |      |
|--------|-----------------------------------------------------------------------------------------------------------------------|-------|---|----|----|-----|-------|-------|-------|-------|--------|-------|----|-----|------|-------|------|
| Q99569 | Plakophilin-4<br>OS=Homo sapiens<br>GN=PKP4<br>PE=1 SV=2 - [PKP4_HUMAN]                                               | 3.36  | 1 | 3  | 4  | 6   | 0.451 | 1.725 | 1.013 | 0.573 | 12.24  | 3.36  | 5  | 6   | 1192 | 131.8 | 8.94 |
| Q60774 | Putative dimethylaniline monooxygenase [N-oxide-forming] 6<br>OS=Homo sapiens<br>GN=FMO6P<br>PE=5 SV=1 - [FMO6_HUMAN] | 3.34  | 1 | 1  | 1  | 1   | 1.359 | 0.188 | 0.344 | 0.573 | 0.00   | 3.34  | 1  | 1   | 539  | 61.3  | 6.39 |
| Q7Z7A1 | Centriolin<br>OS=Homo sapiens<br>GN=CNTRL<br>PE=1 SV=2 - [CNTRL_HUMAN]                                                | 2.28  | 1 | 2  | 7  | 9   | 1.302 | 1.142 | 0.986 | 0.574 | 10.38  | 2.28  | 7  | 9   | 2325 | 268.7 | 5.55 |
| Q14714 | Sarcospan<br>OS=Homo sapiens<br>GN=SSPN<br>PE=2 SV=3 - [SSPN_HUMAN]                                                   | 11.11 | 1 | 2  | 2  | 3   | 0.431 | 0.510 | 0.931 | 0.574 | 6.04   | 11.11 | 2  | 3   | 243  | 26.6  | 7.80 |
| Q9NZP5 | Olfactory receptor 5AC2<br>OS=Homo sapiens<br>GN=OR5AC2<br>PE=2 SV=2 - [O5AC2_HUMAN]                                  | 2.27  | 1 | 1  | 1  | 1   | 1.502 | 0.811 | 1.307 | 0.575 | 1.90   | 2.27  | 1  | 1   | 309  | 35.3  | 8.94 |
| Q14847 | LIM and SH3 domain protein 1<br>OS=Homo sapiens<br>GN=LASP1<br>PE=1 SV=2 - [LASP1_HUMAN]                              | 76.63 | 1 | 21 | 21 | 379 | 0.834 | 0.756 | 1.157 | 0.576 | 955.83 | 76.63 | 33 | 379 | 261  | 29.7  | 7.05 |
| Q9NUU6 | Inactive ubiquitin thioesterase FAM105A<br>OS=Homo sapiens<br>GN=FAM105A<br>PE=2 SV=1 - [F105A_HUMAN]                 | 6.74  | 1 | 3  | 3  | 3   | 5.808 | 1.355 | 1.205 | 0.576 | 2.18   | 6.74  | 3  | 3   | 356  | 42.2  | 9.29 |
| Q71UM5 | 40S ribosomal protein S27-like<br>OS=Homo sapiens<br>GN=RPS27L<br>PE=1 SV=3 - [RS27L_HUMAN]                           | 39.29 | 1 | 1  | 4  | 38  | 0.764 | 1.050 | 0.981 | 0.576 | 94.98  | 39.29 | 8  | 38  | 84   | 9.5   | 9.45 |
| Q14739 | Lamin-B receptor<br>OS=Homo sapiens<br>GN=LBR PE=1 SV=2 - [LBR_HUMAN]                                                 | 4.88  | 1 | 3  | 3  | 5   | 1.173 | 0.170 | 0.503 | 0.576 | 10.36  | 4.88  | 4  | 5   | 615  | 70.7  | 9.36 |

|        |                                                                                                                |       |   |    |    |     |       |       |       |       |        |       |    |     |     |       |      |
|--------|----------------------------------------------------------------------------------------------------------------|-------|---|----|----|-----|-------|-------|-------|-------|--------|-------|----|-----|-----|-------|------|
| Q9BV68 | E3 ubiquitin-protein ligase<br>RNF126<br>OS=Homo sapiens<br>GN=RNF126<br>PE=1 SV=1 - [RNF126_HUMAN]            | 4.91  | 1 | 2  | 2  | 5   | 0.708 | 0.528 | 0.571 | 0.577 | 4.42   | 4.91  | 3  | 5   | 326 | 35.6  | 5.72 |
| Q99536 | Synaptic vesicle membrane protein VAT-1 homolog<br>OS=Homo sapiens<br>GN=VAT1<br>PE=1 SV=2 - [VAT1_HUMAN]      | 49.62 | 1 | 14 | 14 | 135 | 0.904 | 0.990 | 0.970 | 0.577 | 402.74 | 49.62 | 20 | 135 | 393 | 41.9  | 6.29 |
| Q8WVV3 | Reticulon-4-interacting protein 1, mitochondrial<br>OS=Homo sapiens<br>GN=RTN4IP1<br>PE=1 SV=2 - [RT4I1_HUMAN] | 3.54  | 1 | 1  | 1  | 4   | 0.740 | 0.736 | 0.675 | 0.577 | 16.54  | 3.54  | 2  | 4   | 396 | 43.6  | 9.11 |
| Q6N043 | Zinc finger protein 280D<br>OS=Homo sapiens<br>GN=ZNF280D<br>PE=1 SV=3 - [Z280D_HUMAN]                         | 1.33  | 1 | 1  | 1  | 1   | 0.346 | 1.130 | 0.774 | 0.578 | 2.46   | 1.33  | 1  | 1   | 979 | 109.2 | 8.19 |
| Q8NA54 | IQ and ubiquitin-like domain-containing protein<br>OS=Homo sapiens<br>GN=IQUB<br>PE=1 SV=2 - [IQUB_HUMAN]      | 0.76  | 1 | 1  | 1  | 1   | 0.787 | 1.423 | 0.550 | 0.579 | 2.04   | 0.76  | 1  | 1   | 791 | 92.5  | 6.67 |
| Q9NRQ2 | Phospholipid scramblase 4<br>OS=Homo sapiens<br>GN=PLSCR4<br>PE=1 SV=2 - [PLS4_HUMAN]                          | 3.95  | 1 | 1  | 1  | 2   | 0.705 | 0.532 | 0.788 | 0.579 | 2.70   | 3.95  | 2  | 2   | 329 | 37.0  | 5.82 |
| Q9H6S1 | 5-azacytidine-induced protein 2<br>OS=Homo sapiens<br>GN=AZI2 PE=1 SV=1 - [AZI2_HUMAN]                         | 7.65  | 1 | 3  | 3  | 6   | 0.853 | 0.835 | 0.857 | 0.580 | 16.96  | 7.65  | 4  | 6   | 392 | 44.9  | 6.60 |
| P24593 | Insulin-like growth factor-binding protein 5<br>OS=Homo sapiens<br>GN=IGFBP5<br>PE=1 SV=1 - [IBP5_HUMAN]       | 41.54 | 1 | 12 | 12 | 115 | 1.019 | 1.114 | 1.454 | 0.580 | 287.03 | 41.54 | 21 | 115 | 272 | 30.6  | 8.21 |
| P06241 | Tyrosine-protein kinase Fyn<br>OS=Homo sapiens<br>GN=FYN PE=1 SV=3 - [FYN_HUMAN]                               | 13.59 | 7 | 2  | 8  | 47  | 0.641 | 0.976 | 0.921 | 0.581 | 90.35  | 13.59 | 15 | 47  | 537 | 60.7  | 6.67 |

|        |                                                                                                                                                          |       |   |    |    |    |       |       |       |       |       |       |    |    |      |       |      |
|--------|----------------------------------------------------------------------------------------------------------------------------------------------------------|-------|---|----|----|----|-------|-------|-------|-------|-------|-------|----|----|------|-------|------|
| Q0IIM8 | TBC1 domain<br>family member<br>8B OS=Homo<br>sapiens<br>GN=TBC1D8B<br>PE=1 SV=2 -<br>[TBC8B_HUMAN<br>]                                                  | 2.05  | 1 | 2  | 3  | 12 | 0.417 | 0.880 | 0.924 | 0.581 | 29.37 | 2.05  | 5  | 12 | 1120 | 128.6 | 5.95 |
| O95613 | Pericentrin<br>OS=Homo<br>sapiens<br>GN=PCNT<br>PE=1 SV=4 -<br>[PCNT_HUMAN]                                                                              | 1.89  | 1 | 4  | 5  | 8  | 1.581 | 0.695 | 1.133 | 0.582 | 12.80 | 1.89  | 5  | 8  | 3336 | 377.8 | 5.55 |
| Q9NZI8 | Insulin-like<br>growth factor<br>2 mRNA-<br>binding protein<br>1 OS=Homo<br>sapiens<br>GN=IGF2BP1<br>PE=1 SV=2 -<br>[IF2B1_HUMAN<br>]                    | 10.40 | 1 | 3  | 7  | 28 | 0.510 | 2.342 | 6.230 | 0.582 | 65.10 | 10.40 | 10 | 28 | 577  | 63.4  | 9.20 |
| Q7Z444 | GTPase ERas<br>OS=Homo<br>sapiens<br>GN=ERAS<br>PE=2 SV=1 -<br>[RASE_HUMAN]                                                                              | 4.72  | 1 | 1  | 1  | 2  | 0.743 | 0.944 | 0.839 | 0.582 | 1.64  | 4.72  | 1  | 2  | 233  | 25.3  | 6.58 |
| P98160 | Basement<br>membrane-<br>specific<br>heparan<br>sulfate<br>proteoglycan<br>core protein<br>OS=Homo<br>sapiens<br>GN=HSPG2<br>PE=1 SV=4 -<br>[PGBM_HUMAN] | 5.51  | 1 | 18 | 18 | 43 | 0.486 | 0.875 | 1.288 | 0.583 | 96.85 | 5.51  | 30 | 43 | 4391 | 468.5 | 6.51 |
| P22415 | Upstream<br>stimulatory<br>factor 1<br>OS=Homo<br>sapiens<br>GN=USF1<br>PE=1 SV=1 -<br>[USF1_HUMAN]                                                      | 1.94  | 2 | 1  | 1  | 5  | 0.883 | 1.037 | 1.197 | 0.583 | 1.85  | 1.94  | 1  | 5  | 310  | 33.5  | 5.54 |
| A6NKC4 | Putative high<br>affinity<br>immunoglobulin<br>gamma Fc<br>receptor IC<br>OS=Homo<br>sapiens<br>GN=FCGR1C<br>PE=5 SV=2 -<br>[FCGRC_HUMAN<br>]            | 3.21  | 3 | 1  | 1  | 2  | 0.436 | 0.715 | 0.908 | 0.583 | 3.86  | 3.21  | 1  | 2  | 280  | 32.1  | 8.68 |
| O15245 | Solute carrier<br>family 22<br>member 1<br>OS=Homo<br>sapiens<br>GN=SLC22A1<br>PE=1 SV=2 -<br>[S22A1_HUMAN<br>]                                          | 1.99  | 1 | 1  | 1  | 2  | 0.388 | 0.542 | 0.948 | 0.583 | 3.85  | 1.99  | 1  | 2  | 554  | 61.1  | 6.83 |



|        |                                                                                                                         |       |   |    |    |    |       |       |       |       |        |       |    |    |      |       |      |
|--------|-------------------------------------------------------------------------------------------------------------------------|-------|---|----|----|----|-------|-------|-------|-------|--------|-------|----|----|------|-------|------|
| Q8TEA8 | D-tyrosyl-<br>tRNA(Tyr)<br>deacylase 1<br>OS=Homo<br>sapiens<br>GN=DTD1<br>PE=1 SV=2 -<br>[DTD1_HUMAN]                  | 20.10 | 1 | 5  | 5  | 6  | 0.710 | 0.798 | 0.702 | 0.584 | 12.65  | 20.10 | 6  | 6  | 209  | 23.4  | 8.24 |
| Q14416 | Metabotropic<br>glutamate<br>receptor 2<br>OS=Homo<br>sapiens<br>GN=GRM2<br>PE=1 SV=2 -<br>[GRM2_HUMAN]                 | 0.80  | 1 | 1  | 1  | 1  | 0.558 | 0.732 | 0.624 | 0.584 | 2.37   | 0.80  | 1  | 1  | 872  | 95.5  | 8.12 |
| Q9C0D0 | Phosphatase<br>and actin<br>regulator 1<br>OS=Homo<br>sapiens<br>GN=PHACTR1<br>PE=2 SV=3 -<br>[PHAR1_HUMAN<br>]         | 3.79  | 1 | 1  | 2  | 10 | 2.441 | 0.441 | 0.691 | 0.584 | 27.35  | 3.79  | 2  | 10 | 580  | 66.3  | 6.96 |
| Q9UJ78 | Zinc finger<br>MYM-type<br>protein 5<br>OS=Homo<br>sapiens<br>GN=ZMYM5<br>PE=1 SV=4 -<br>[ZMYM5_HUMA<br>N]              | 1.64  | 1 | 1  | 1  | 1  | 1.445 | 1.091 | 0.929 | 0.584 | 0.00   | 1.64  | 1  | 1  | 669  | 74.8  | 8.16 |
| Q9NR45 | Sialic add<br>synthase<br>OS=Homo<br>sapiens<br>GN=NANS<br>PE=1 SV=2 -<br>[SIAS_HUMAN]                                  | 47.35 | 1 | 14 | 14 | 87 | 0.603 | 0.976 | 1.002 | 0.585 | 259.29 | 47.35 | 24 | 87 | 359  | 40.3  | 6.74 |
| Q9Y4K1 | Absent in<br>melanoma 1<br>protein<br>OS=Homo<br>sapiens<br>GN=AIM1<br>PE=1 SV=3 -<br>[AIM1_HUMAN]                      | 2.50  | 1 | 4  | 4  | 22 | 1.179 | 0.698 | 0.809 | 0.585 | 42.30  | 2.50  | 7  | 22 | 1723 | 188.6 | 5.86 |
| Q96BM9 | ADP-<br>ribosylation<br>factor-like<br>protein 8A<br>OS=Homo<br>sapiens<br>GN=ARL8A<br>PE=1 SV=1 -<br>[ARL8A_HUMAN<br>] | 28.49 | 1 | 2  | 6  | 17 | 0.855 | 0.936 | 0.804 | 0.586 | 31.82  | 28.49 | 9  | 17 | 186  | 21.4  | 7.77 |
| Q15646 | 2'-5'-<br>oligoadenylate<br>synthase-like<br>protein<br>OS=Homo<br>sapiens<br>GN=OASL<br>PE=1 SV=2 -<br>[OASL_HUMAN]    | 2.33  | 1 | 1  | 1  | 1  |       |       |       | 0.587 | 2.47   | 2.33  | 1  | 1  | 514  | 59.2  | 7.87 |

|        |                                                                                                                  |       |   |    |    |     |       |       |       |       |        |       |    |     |      |       |      |
|--------|------------------------------------------------------------------------------------------------------------------|-------|---|----|----|-----|-------|-------|-------|-------|--------|-------|----|-----|------|-------|------|
| Q86XA9 | HEAT repeat-containing protein 5A<br>OS=Homo sapiens<br>GN=HEATR5A<br>PE=1 SV=2 - [HTR5A_HUMAN]                  | 2.89  | 1 | 5  | 5  | 15  | 0.887 | 0.832 | 1.030 | 0.587 | 37.26  | 2.89  | 7  | 15  | 2040 | 221.9 | 6.58 |
| Q9NRA2 | Sialin<br>OS=Homo sapiens<br>GN=SLC17A5<br>PE=1 SV=2 - [S17A5_HUMAN]                                             | 3.84  | 1 | 2  | 2  | 3   | 0.654 | 0.335 | 0.464 | 0.588 | 4.90   | 3.84  | 3  | 3   | 495  | 54.6  | 8.27 |
| P02786 | Transferrin receptor protein 1<br>OS=Homo sapiens<br>GN=TFRC<br>PE=1 SV=2 - [TFR1_HUMAN]                         | 39.47 | 2 | 30 | 30 | 145 | 0.751 | 0.668 | 0.407 | 0.588 | 329.57 | 39.47 | 51 | 145 | 760  | 84.8  | 6.61 |
| Q8IZ07 | Ankyrin repeat domain-containing protein 13A<br>OS=Homo sapiens<br>GN=ANKRD13A<br>PE=1 SV=3 - [AN13A_HUMAN]      | 38.14 | 1 | 17 | 17 | 57  | 0.612 | 0.874 | 1.096 | 0.589 | 139.96 | 38.14 | 26 | 57  | 590  | 67.6  | 5.02 |
| Q04721 | Neurogenic locus notch homolog protein 2<br>OS=Homo sapiens<br>GN=NOTCH2<br>PE=1 SV=3 - [NOTC2_HUMAN]            | 5.87  | 1 | 9  | 11 | 28  | 0.463 | 0.869 | 0.946 | 0.589 | 65.28  | 5.87  | 19 | 28  | 2471 | 265.2 | 5.14 |
| P54577 | Tyrosine--tRNA ligase, cytoplasmic<br>OS=Homo sapiens<br>GN=YARS<br>PE=1 SV=4 - [SYYC_HUMAN]                     | 57.20 | 1 | 36 | 37 | 136 | 0.587 | 0.772 | 0.763 | 0.589 | 300.07 | 57.20 | 58 | 136 | 528  | 59.1  | 7.05 |
| Q96G01 | Protein bicaudal D homolog 1<br>OS=Homo sapiens<br>GN=BICD1<br>PE=1 SV=3 - [BICD1_HUMAN]                         | 2.36  | 1 | 1  | 2  | 4   | 1.575 | 0.778 | 0.877 | 0.589 | 7.80   | 2.36  | 3  | 4   | 975  | 110.7 | 5.81 |
| P0C874 | Putative spermatogenesis-associated protein 31D3<br>OS=Homo sapiens<br>GN=SPATA31D3<br>PE=5 SV=1 - [S31D3_HUMAN] | 4.47  | 2 | 2  | 2  | 2   | 2.008 | 1.641 | 1.390 | 0.590 | 4.63   | 4.47  | 2  | 2   | 917  | 102.4 | 8.07 |

|        |                                                                                                                             |       |   |    |    |     |       |       |       |       |        |       |    |     |      |       |      |
|--------|-----------------------------------------------------------------------------------------------------------------------------|-------|---|----|----|-----|-------|-------|-------|-------|--------|-------|----|-----|------|-------|------|
| Q9NYC9 | Dynein heavy chain 9, axonemal<br>OS=Homo sapiens<br>GN=DNAH9<br>PE=1 SV=3 - [DYH9_HUMAN]                                   | 1.09  | 1 | 2  | 7  | 34  | 0.533 | 0.797 | 0.978 | 0.591 | 73.38  | 1.09  | 8  | 34  | 4486 | 511.6 | 5.91 |
| O60238 | BCL2/adenovirus E1B 19 kDa protein-interacting protein 3-like<br>OS=Homo sapiens<br>GN=BNIP3L<br>PE=1 SV=1 - [BNIP3L_HUMAN] | 10.50 | 1 | 1  | 1  | 3   | 1.658 | 0.993 | 1.565 | 0.591 | 13.46  | 10.50 | 1  | 3   | 219  | 23.9  | 5.85 |
| P51797 | Chloride transport protein 6<br>OS=Homo sapiens<br>GN=CLCN6<br>PE=1 SV=2 - [CLCN6_HUMAN]                                    | 1.27  | 1 | 1  | 1  | 1   | 1.296 | 1.069 | 0.663 | 0.592 | 3.42   | 1.27  | 1  | 1   | 869  | 97.2  | 6.81 |
| O14513 | Nck-associated protein 5<br>OS=Homo sapiens<br>GN=NCKAP5<br>PE=1 SV=2 - [NCKP5_HUMAN]                                       | 0.58  | 1 | 1  | 1  | 1   | 2.294 | 0.935 | 0.991 | 0.592 | 2.64   | 0.58  | 1  | 1   | 1909 | 208.4 | 8.07 |
| Q9HC35 | Echinoderm microtubule-associated protein-like 4<br>OS=Homo sapiens<br>GN=EML4<br>PE=1 SV=3 - [EMAL4_HUMAN]                 | 24.87 | 1 | 21 | 22 | 79  | 0.631 | 0.877 | 1.064 | 0.593 | 171.42 | 24.87 | 36 | 79  | 981  | 108.8 | 6.40 |
| P60981 | Dextrin<br>OS=Homo sapiens<br>GN=DSTN<br>PE=1 SV=3 - [DEST_HUMAN]                                                           | 66.06 | 1 | 15 | 17 | 139 | 0.928 | 0.725 | 0.983 | 0.593 | 308.88 | 66.06 | 26 | 139 | 165  | 18.5  | 7.85 |
| Q9NWC3 | Putative sodium-coupled neutral amino acid transporter 7<br>OS=Homo sapiens<br>GN=SLC38A7<br>PE=2 SV=1 - [S38A7_HUMAN]      | 2.60  | 1 | 1  | 1  | 7   | 0.537 | 0.445 | 0.170 | 0.593 | 21.89  | 2.60  | 1  | 7   | 462  | 49.9  | 5.08 |
| P63172 | Dynein light chain Tctex-type 1<br>OS=Homo sapiens<br>GN=DYNLT1<br>PE=1 SV=1 - [DYLT1_HUMAN]                                | 14.16 | 1 | 1  | 1  | 7   | 0.672 | 1.140 | 1.250 | 0.593 | 33.22  | 14.16 | 2  | 7   | 113  | 12.4  | 5.08 |
| Q9Y2T6 | G-protein coupled receptor 55<br>OS=Homo sapiens<br>GN=GPR55<br>PE=1 SV=2 - [GPR55_HUMAN]                                   | 3.76  | 1 | 1  | 1  | 1   | 1.279 | 0.126 | 0.315 | 0.593 | 1.62   | 3.76  | 1  | 1   | 319  | 36.6  | 8.43 |

|        |                                                                                                                               |       |   |    |    |     |       |       |       |       |        |       |    |     |      |       |      |
|--------|-------------------------------------------------------------------------------------------------------------------------------|-------|---|----|----|-----|-------|-------|-------|-------|--------|-------|----|-----|------|-------|------|
| P11308 | Transcriptional regulator ERG<br>OS=Homo sapiens<br>GN=ERG PE=1 SV=2 - [ERG_HUMAN]                                            | 3.50  | 1 | 1  | 1  | 1   | 0.770 | 1.036 | 1.331 | 0.593 | 0.00   | 3.50  | 1  | 1   | 486  | 54.6  | 7.47 |
| Q5T013 | Putative hydroxypruvate isomerase<br>OS=Homo sapiens<br>GN=HYI PE=1 SV=2 - [HYI_HUMAN]                                        | 19.13 | 1 | 5  | 5  | 13  | 1.079 | 0.786 | 0.896 | 0.594 | 27.99  | 19.13 | 8  | 13  | 277  | 30.4  | 5.50 |
| P43003 | Excitatory amino acid transporter 1<br>OS=Homo sapiens<br>GN=SLC1A3 PE=1 SV=1 - [EAA1_HUMAN]                                  | 5.72  | 1 | 1  | 2  | 2   | 0.363 | 0.524 | 0.718 | 0.594 | 2.57   | 5.72  | 2  | 2   | 542  | 59.5  | 8.41 |
| Q86YW9 | Mediator of RNA polymerase II transcription subunit 12-like protein<br>OS=Homo sapiens<br>GN=MED12L PE=1 SV=2 - [MD12L_HUMAN] | 1.03  | 1 | 2  | 2  | 4   | 0.723 | 0.591 | 0.869 | 0.594 | 0.00   | 1.03  | 2  | 4   | 2145 | 240.0 | 7.77 |
| O75335 | Liprin-alpha-4<br>OS=Homo sapiens<br>GN=PPFIA4 PE=2 SV=3 - [LIPA4_HUMAN]                                                      | 7.00  | 3 | 2  | 8  | 25  | 0.877 | 0.650 | 0.800 | 0.594 | 67.42  | 7.00  | 11 | 25  | 1185 | 134.3 | 6.74 |
| P24592 | Insulin-like growth factor-binding protein 6<br>OS=Homo sapiens<br>GN=IGFBP6 PE=1 SV=1 - [IBP6_HUMAN]                         | 4.17  | 1 | 1  | 1  | 2   | 0.775 | 0.987 | 1.145 | 0.595 | 4.17   | 4.17  | 1  | 2   | 240  | 25.3  | 7.81 |
| Q9UDY8 | Mucosa-associated lymphoid tissue lymphoma translocation protein 1<br>OS=Homo sapiens<br>GN=MALT1 PE=1 SV=1 - [MALT1_HUMAN]   | 7.65  | 1 | 5  | 6  | 23  | 0.894 | 0.422 | 0.685 | 0.595 | 47.52  | 7.65  | 9  | 23  | 824  | 92.2  | 5.73 |
| P11216 | Glycogen phosphorylase, brain form<br>OS=Homo sapiens<br>GN=PYGB PE=1 SV=5 - [PYGB_HUMAN]                                     | 45.08 | 1 | 30 | 39 | 233 | 0.857 | 1.329 | 1.069 | 0.595 | 555.80 | 45.08 | 63 | 233 | 843  | 96.6  | 6.86 |

|        |                                                                                                                                            |       |   |    |    |     |       |       |       |       |        |       |    |     |      |       |      |
|--------|--------------------------------------------------------------------------------------------------------------------------------------------|-------|---|----|----|-----|-------|-------|-------|-------|--------|-------|----|-----|------|-------|------|
| Q86UW6 | NEDD4-binding protein 2<br>OS=Homo sapiens<br>GN=N4BP2<br>PE=1 SV=2 - [N4BP2_HUMAN]                                                        | 1.69  | 2 | 1  | 3  | 4   | 0.442 | 1.020 | 0.834 | 0.595 | 4.59   | 1.69  | 3  | 4   | 1770 | 198.7 | 5.21 |
| O60437 | Periplakin<br>OS=Homo sapiens<br>GN=PPL PE=1 SV=4 - [PEPL_HUMAN]                                                                           | 8.71  | 1 | 14 | 16 | 41  | 0.404 | 2.566 | 0.684 | 0.597 | 94.31  | 8.71  | 22 | 41  | 1756 | 204.6 | 5.60 |
| Q00534 | Cyclin-dependent kinase 6<br>OS=Homo sapiens<br>GN=CDK6<br>PE=1 SV=1 - [CDK6_HUMAN]                                                        | 17.18 | 6 | 4  | 5  | 21  | 0.524 | 0.787 | 0.950 | 0.597 | 49.97  | 17.18 | 9  | 21  | 326  | 36.9  | 6.46 |
| O14544 | Suppressor of cytokine signaling 6<br>OS=Homo sapiens<br>GN=SOCS6<br>PE=1 SV=2 - [SOCS6_HUMAN]                                             | 1.87  | 1 | 1  | 2  | 2   | 0.774 | 1.177 | 1.345 | 0.599 | 4.09   | 1.87  | 2  | 2   | 535  | 59.5  | 7.25 |
| Q9Y279 | V-set and immunoglobulin domain-containing protein 4<br>OS=Homo sapiens<br>GN=VSIG4<br>PE=1 SV=1 - [VSIG4_HUMAN]                           | 2.51  | 1 | 1  | 1  | 2   | 0.478 | 0.722 | 0.912 | 0.599 | 1.93   | 2.51  | 1  | 2   | 399  | 44.0  | 6.35 |
| Q6LXY1 | Brain-specific angiogenesis inhibitor 1-associated protein 2-like protein 2<br>OS=Homo sapiens<br>GN=BAIAP2L2<br>PE=1 SV=1 - [BI2L2_HUMAN] | 7.75  | 1 | 2  | 2  | 4   | 0.910 | 0.615 | 1.186 | 0.599 | 3.03   | 7.75  | 2  | 4   | 529  | 58.9  | 9.51 |
| Q96EQ0 | Small glutamine-rich tetratricopeptide repeat-containing protein beta<br>OS=Homo sapiens<br>GN=SGTB<br>PE=1 SV=1 - [SGTB_HUMAN]            | 9.54  | 1 | 3  | 3  | 7   | 0.381 | 0.958 | 1.038 | 0.599 | 20.22  | 9.54  | 4  | 7   | 304  | 33.4  | 4.92 |
| Q16527 | Cysteine and glycine-rich protein 2<br>OS=Homo sapiens<br>GN=CSRP2<br>PE=1 SV=3 - [CSRP2_HUMAN]                                            | 63.21 | 1 | 12 | 12 | 125 | 0.650 | 0.569 | 1.789 | 0.599 | 324.50 | 63.21 | 22 | 125 | 193  | 20.9  | 8.62 |

|        |                                                                                                                                                                                                                                                                             |       |   |    |    |     |       |       |       |       |         |       |    |     |      |       |      |
|--------|-----------------------------------------------------------------------------------------------------------------------------------------------------------------------------------------------------------------------------------------------------------------------------|-------|---|----|----|-----|-------|-------|-------|-------|---------|-------|----|-----|------|-------|------|
| Q99952 | Tyrosine-<br>protein<br>phosphatase<br>non-receptor<br>type 18<br>OS=Homo<br>sapiens<br>GN=PTPN18<br>PE=1 SV=2 -<br>[PTN18_HUMAN<br>]<br>ATP-<br>dependent 6-<br>phosphofructok<br>inase, platelet<br>type OS=Homo<br>sapiens<br>GN=PFPK<br>PE=1 SV=2 -<br>[PFPK_HUMAN<br>] | 6.96  | 1 | 2  | 2  | 5   | 0.678 | 1.008 | 1.029 | 0.600 | 5.16    | 6.96  | 2  | 5   | 460  | 50.5  | 8.25 |
| Q01813 | Collagen alpha-<br>5(VI) chain<br>OS=Homo<br>sapiens<br>GN=COL6A5<br>PE=1 SV=1 -<br>[CO6A5_HUMA<br>N]<br>Dedicator of<br>cytokinesis<br>protein 11<br>OS=Homo<br>sapiens<br>GN=DOCK11<br>PE=1 SV=2 -<br>[DC11_HUMA<br>N]                                                    | 43.62 | 1 | 31 | 35 | 221 | 1.017 | 1.101 | 1.056 | 0.600 | 494.98  | 43.62 | 58 | 221 | 784  | 85.5  | 7.55 |
| A8TX70 | Probable<br>ubiquitin<br>carboxyl-<br>terminal<br>hydrolase FAF-<br>Y OS=Homo<br>sapiens<br>GN=USP9Y<br>PE=2 SV=2 -<br>[USP9Y_HUMAN<br>]                                                                                                                                    | 1.34  | 1 | 3  | 4  | 4   | 0.958 | 1.054 | 0.901 | 0.601 | 1.66    | 1.34  | 4  | 4   | 2615 | 289.7 | 6.95 |
| Q5JSL3 | Calumenin<br>OS=Homo<br>sapiens<br>GN=CALLU PE=1<br>SV=2 -<br>[CALLU_HUMAN]                                                                                                                                                                                                 | 3.23  | 1 | 5  | 5  | 14  | 0.633 | 1.185 | 1.087 | 0.601 | 28.77   | 3.23  | 7  | 14  | 2073 | 237.5 | 7.74 |
| O00507 | UPF0378<br>protein<br>KIAA0100<br>OS=Homo<br>sapiens<br>GN=KIAA0100<br>PE=1 SV=3 -<br>[K0100_HUMAN<br>]                                                                                                                                                                     | 6.18  | 3 | 2  | 17 | 36  | 1.409 | 1.003 | 0.700 | 0.602 | 81.35   | 6.18  | 27 | 36  | 2555 | 290.9 | 5.86 |
| O43852 | Creatine kinase<br>B-type<br>OS=Homo<br>sapiens<br>GN=CKB PE=1<br>SV=1 -<br>[KCRB_HUMAN]                                                                                                                                                                                    | 75.24 | 1 | 27 | 27 | 620 | 0.631 | 0.656 | 0.759 | 0.603 | 1784.81 | 75.24 | 43 | 620 | 315  | 37.1  | 4.64 |
| Q14667 | Galectin-10<br>OS=Homo<br>sapiens<br>GN=CLC PE=1<br>SV=3 -<br>[LEG10_HUMAN<br>]                                                                                                                                                                                             | 2.60  | 1 | 2  | 4  | 4   | 0.736 | 1.266 | 1.951 | 0.604 | 4.99    | 2.60  | 4  | 4   | 2235 | 253.5 | 7.14 |
| P12277 |                                                                                                                                                                                                                                                                             | 43.04 | 3 | 13 | 14 | 48  | 0.974 | 3.016 | 1.067 | 0.604 | 127.26  | 43.04 | 20 | 48  | 381  | 42.6  | 5.59 |
| Q05315 |                                                                                                                                                                                                                                                                             | 4.23  | 1 | 1  | 1  | 1   | 0.763 | 1.467 | 1.010 | 0.604 | 0.00    | 4.23  | 1  | 1   | 142  | 16.4  | 7.37 |

|        |                                                                                                                |       |   |    |    |     |       |       |       |       |         |       |    |     |      |       |      |
|--------|----------------------------------------------------------------------------------------------------------------|-------|---|----|----|-----|-------|-------|-------|-------|---------|-------|----|-----|------|-------|------|
| P00338 | L-lactate dehydrogenase A chain<br>OS=Homo sapiens<br>GN=LDHA PE=1 SV=2 - [LDHA_HUMAN]                         | 70.48 | 2 | 26 | 30 | 616 | 0.981 | 0.841 | 0.689 | 0.604 | 1335.66 | 70.48 | 49 | 616 | 332  | 36.7  | 8.27 |
| Q13637 | Ras-related protein Rab-32<br>OS=Homo sapiens<br>GN=RAB32 PE=1 SV=3 - [RAB32_HUMAN]                            | 36.89 | 1 | 7  | 7  | 24  | 0.946 | 0.626 | 0.996 | 0.605 | 54.22   | 36.89 | 12 | 24  | 225  | 25.0  | 6.54 |
| Q6P2C0 | WD repeat-containing protein 93<br>OS=Homo sapiens<br>GN=WDR93 PE=2 SV=1 - [WDR93_HUMAN]                       | 1.60  | 1 | 1  | 1  | 1   | 0.620 | 0.677 | 0.524 | 0.605 | 2.48    | 1.60  | 1  | 1   | 686  | 77.3  | 6.39 |
| Q9NZJ9 | Diphosphoinositol polyphosphate phosphohydrolase 2<br>OS=Homo sapiens<br>GN=NUDT4 PE=1 SV=2 - [NUDT4_HUMAN]    | 32.22 | 1 | 2  | 6  | 23  | 0.707 | 1.754 | 1.293 | 0.605 | 57.29   | 32.22 | 9  | 23  | 180  | 20.3  | 6.35 |
| P09544 | Protein Wnt-2<br>OS=Homo sapiens<br>GN=WNT2 PE=1 SV=1 - [WNT2_HUMAN]                                           | 3.89  | 1 | 1  | 1  | 1   | 0.960 | 1.247 | 0.605 | 3.74  | 3.89    | 3.89  | 1  | 1   | 360  | 40.4  | 8.70 |
| Q8WUY3 | Protein prune homolog 2<br>OS=Homo sapiens<br>GN=PRUNE2 PE=1 SV=3 - [PRUNE2_HUMAN]                             | 4.27  | 1 | 10 | 10 | 22  | 0.494 | 2.139 | 1.367 | 0.605 | 58.79   | 4.27  | 14 | 22  | 3088 | 340.4 | 4.45 |
| Q9ULT0 | Tetratricopeptide repeat protein 7A<br>OS=Homo sapiens<br>GN=TTC7A PE=1 SV=3 - [TTC7A_HUMAN]                   | 5.36  | 1 | 4  | 4  | 4   | 0.695 | 0.732 | 0.623 | 0.605 | 8.73    | 5.36  | 4  | 4   | 858  | 96.1  | 6.46 |
| Q9UIF9 | Bromodomain adjacent to zinc finger domain protein 2A<br>OS=Homo sapiens<br>GN=BAZ2A PE=1 SV=4 - [BAZ2A_HUMAN] | 0.79  | 1 | 2  | 2  | 2   | 0.717 | 1.104 | 1.231 | 0.605 | 2.13    | 0.79  | 2  | 2   | 1905 | 211.1 | 6.64 |
| Q12979 | Active breakpoint cluster region-related protein<br>OS=Homo sapiens<br>GN=ABR PE=2 SV=2 - [ABR_HUMAN]          | 8.85  | 1 | 5  | 7  | 15  | 0.881 | 0.781 | 0.898 | 0.605 | 24.21   | 8.85  | 9  | 15  | 859  | 97.5  | 6.55 |

|        |                                                                                                                                                                                                                 |       |   |   |   |    |       |       |       |       |       |       |    |    |     |       |      |
|--------|-----------------------------------------------------------------------------------------------------------------------------------------------------------------------------------------------------------------|-------|---|---|---|----|-------|-------|-------|-------|-------|-------|----|----|-----|-------|------|
| Q8N5M1 | ATP synthase<br>mitochondrial<br>F1 complex<br>assembly factor<br>2 OS=Homo<br>sapiens<br>GN=ATPAF2<br>PE=1 SV=1 -<br>[ATPF2_HUMAN<br>]<br>CDK2-<br>associated and<br>cullin domain-<br>containing<br>protein 1 | 4.15  | 1 | 1 | 1 | 4  | 0.906 | 0.613 | 0.677 | 0.606 | 10.65 | 4.15  | 2  | 4  | 289 | 32.8  | 7.09 |
| Q86Y37 | OS=Homo<br>sapiens<br>GN=CACUL1<br>PE=1 SV=1 -<br>[CACL1_HUMAN<br>]                                                                                                                                             | 8.13  | 1 | 2 | 2 | 2  | 0.928 | 0.514 | 1.018 | 0.606 | 5.96  | 8.13  | 2  | 2  | 369 | 41.0  | 5.19 |
| Q68D10 | Protein SPT2<br>homolog<br>OS=Homo<br>sapiens<br>GN=SPTY2D1<br>PE=1 SV=3 -<br>[SPT2_HUMAN]                                                                                                                      | 7.01  | 1 | 3 | 4 | 4  | 0.793 | 0.904 | 0.846 | 0.606 | 9.44  | 7.01  | 4  | 4  | 685 | 75.6  | 9.79 |
| Q96CJ1 | ELL-associated<br>factor 2<br>OS=Homo<br>sapiens<br>GN=EAF2<br>PE=1 SV=1 -<br>[EAF2_HUMAN]                                                                                                                      | 3.08  | 1 | 1 | 1 | 1  | 0.893 | 1.348 | 1.499 | 0.606 | 2.41  | 3.08  | 1  | 1  | 260 | 28.8  | 5.17 |
| Q10472 | Polypeptide N-<br>acetylgalactosa<br>minyltransferas<br>e 1 OS=Homo<br>sapiens<br>GN=GALNT1<br>PE=1 SV=1 -<br>[GALT1_HUMAN<br>]                                                                                 | 11.09 | 1 | 4 | 5 | 14 | 0.446 | 0.849 | 0.515 | 0.607 | 40.16 | 11.09 | 8  | 14 | 559 | 64.2  | 7.72 |
| Q9Y3B3 | Transmembran<br>e emp24<br>domain-<br>containing<br>protein 7<br>OS=Homo<br>sapiens<br>GN=TMED7<br>PE=1 SV=2 -<br>[TMED7_HUMA]                                                                                  | 26.79 | 1 | 5 | 5 | 22 | 0.913 | 0.985 | 0.903 | 0.607 | 69.08 | 26.79 | 8  | 22 | 224 | 25.2  | 6.89 |
| Q75V66 | Anoctamin-5<br>OS=Homo<br>sapiens<br>GN=ANOS<br>PE=1 SV=1 -<br>[ANOS_HUMAN]                                                                                                                                     | 1.97  | 1 | 1 | 1 | 3  | 0.722 | 0.929 | 1.002 | 0.607 | 0.00  | 1.97  | 1  | 3  | 913 | 107.1 | 6.80 |
| Q6IQ22 | Ras-related<br>protein Rab-12<br>OS=Homo<br>sapiens<br>GN=RAB12<br>PE=1 SV=3 -<br>[RAB12_HUMAN<br>]                                                                                                             | 33.61 | 2 | 6 | 7 | 32 | 0.573 | 0.850 | 0.865 | 0.607 | 72.88 | 33.61 | 10 | 32 | 244 | 27.2  | 8.41 |
| Q9GZZ8 | Extracellular<br>glycoprotein<br>lacritin<br>OS=Homo<br>sapiens<br>GN=LACRT<br>PE=1 SV=1 -<br>[LACRT_HUMAN<br>]                                                                                                 | 8.70  | 1 | 1 | 1 | 1  | 1.493 | 1.043 | 1.669 | 0.607 | 2.32  | 8.70  | 1  | 1  | 138 | 14.2  | 5.50 |



|        |                                                                                                                             |       |   |    |    |    |       |       |       |       |        |       |    |    |      |       |      |
|--------|-----------------------------------------------------------------------------------------------------------------------------|-------|---|----|----|----|-------|-------|-------|-------|--------|-------|----|----|------|-------|------|
| Q6DD88 | Atlastin-3<br>OS=Homo sapiens<br>GN=ATL3 PE=1 SV=1 - [ATLA3_HUMAN]                                                          | 40.67 | 1 | 19 | 19 | 88 | 0.844 | 1.144 | 0.803 | 0.608 | 222.27 | 40.67 | 29 | 88 | 541  | 60.5  | 5.66 |
| Q96MX3 | Zinc finger protein 48<br>OS=Homo sapiens<br>GN=ZNF48 PE=1 SV=2 - [ZNF48_HUMAN]                                             | 1.62  | 1 | 1  | 1  | 1  | 1.668 | 0.978 | 0.719 | 0.608 | 1.99   | 1.62  | 1  | 1  | 618  | 67.8  | 9.36 |
| P29536 | Leiomodin-1<br>OS=Homo sapiens<br>GN=LMOD1 PE=1 SV=3 - [LMOD1_HUMAN]                                                        | 30.50 | 1 | 22 | 22 | 73 | 0.603 | 2.100 | 1.979 | 0.609 | 148.47 | 30.50 | 31 | 73 | 600  | 67.0  | 9.33 |
| O95490 | Latrophilin-2<br>OS=Homo sapiens<br>GN=LPHN2 PE=1 SV=2 - [LPHN2_HUMAN]                                                      | 0.89  | 1 | 1  | 1  | 1  | 1.008 | 1.231 | 0.945 | 0.609 | 2.82   | 0.89  | 1  | 1  | 1459 | 163.2 | 6.43 |
| Q9Y3S2 | Zinc finger protein 330<br>OS=Homo sapiens<br>GN=ZNF330 PE=1 SV=1 - [ZNF330_HUMAN]                                          | 11.25 | 1 | 4  | 4  | 5  | 0.645 | 0.757 | 0.918 | 0.609 | 11.80  | 11.25 | 4  | 5  | 320  | 36.2  | 6.16 |
| Q14192 | Four and a half LIM domains protein 2<br>OS=Homo sapiens<br>GN=FHL2 PE=1 SV=3 - [FHL2_HUMAN]                                | 54.84 | 1 | 15 | 15 | 77 | 1.772 | 0.802 | 0.950 | 0.609 | 167.99 | 54.84 | 22 | 77 | 279  | 32.2  | 7.55 |
| Q9UBI6 | Guanine nucleotide-binding protein G(I)/G(S)/G(O) subunit gamma-12<br>OS=Homo sapiens<br>GN=GNG12 PE=1 SV=3 - [GBG12_HUMAN] | 70.83 | 1 | 6  | 6  | 40 | 0.685 | 0.804 | 0.816 | 0.609 | 83.19  | 70.83 | 11 | 40 | 72   | 8.0   | 8.97 |
| P14209 | CD99 antigen<br>OS=Homo sapiens<br>GN=CD99 PE=1 SV=1 - [CD99_HUMAN]                                                         | 13.51 | 1 | 2  | 2  | 8  | 2.471 | 1.071 | 0.854 | 0.610 | 22.57  | 13.51 | 4  | 8  | 185  | 18.8  | 4.75 |
| O60939 | Sodium channel subunit beta-2<br>OS=Homo sapiens<br>GN=SCN2B PE=1 SV=1 - [SCN2B_HUMAN]                                      | 3.26  | 1 | 1  | 1  | 6  | 0.741 | 1.163 | 1.155 | 0.610 | 10.67  | 3.26  | 2  | 6  | 215  | 24.3  | 6.39 |
| Q5TBB1 | Ribonuclease H2 subunit B<br>OS=Homo sapiens<br>GN=RNASEH2B PE=1 SV=1 - [RNH2B_HUMAN]                                       | 3.85  | 1 | 1  | 1  | 4  | 0.956 | 1.174 | 1.419 | 0.610 | 9.58   | 3.85  | 2  | 4  | 312  | 35.1  | 9.13 |

|        |                                                                                                              |       |   |    |    |    |       |       |       |       |       |       |    |    |     |      |      |
|--------|--------------------------------------------------------------------------------------------------------------|-------|---|----|----|----|-------|-------|-------|-------|-------|-------|----|----|-----|------|------|
| Q5R372 | Rab GTPase-activating protein 1-like<br>OS=Homo sapiens<br>GN=RABGAP1L<br>PE=1 SV=1 - [RBGL1_HUMAN]          | 9.08  | 1 | 6  | 7  | 20 | 0.812 | 1.188 | 1.267 | 0.610 | 46.32 | 9.08  | 9  | 20 | 815 | 92.5 | 5.31 |
| P31483 | Nucleosyn TIA-1 isoform p40<br>OS=Homo sapiens<br>GN=TIA1 PE=1 SV=3 - [TIA1_HUMAN]                           | 9.59  | 1 | 1  | 4  | 8  | 1.028 | 0.582 | 1.037 | 0.611 | 22.55 | 9.59  | 5  | 8  | 386 | 42.9 | 7.74 |
| Q96D70 | R3H domain-containing protein 4<br>OS=Homo sapiens<br>GN=R3HDM4<br>PE=1 SV=3 - [R3HD4_HUMAN]                 | 2.61  | 1 | 1  | 1  | 1  | 0.450 | 0.278 | 0.663 | 0.611 | 2.09  | 2.61  | 1  | 1  | 268 | 30.3 | 8.56 |
| Q9H8T0 | AKT-interacting protein<br>OS=Homo sapiens<br>GN=AKTIP<br>PE=1 SV=1 - [AKTIP_HUMAN]                          | 2.74  | 1 | 1  | 1  | 2  | 1.076 | 1.470 | 1.362 | 0.611 | 3.49  | 2.74  | 1  | 2  | 292 | 33.1 | 9.31 |
| Q8TC99 | Fibronectin type III domain-containing protein 8<br>OS=Homo sapiens<br>GN=FNDC8<br>PE=2 SV=2 - [FNDC8_HUMAN] | 3.09  | 1 | 1  | 1  | 1  | 0.432 | 1.322 | 2.689 | 0.612 | 2.32  | 3.09  | 1  | 1  | 324 | 35.9 | 5.08 |
| Q8NG48 | Protein Lines homolog<br>OS=Homo sapiens<br>GN=LINS PE=2 SV=2 - [LINES_HUMAN]                                | 2.91  | 1 | 1  | 1  | 1  | 0.861 | 0.983 | 1.225 | 0.612 | 0.00  | 2.91  | 1  | 1  | 757 | 85.8 | 6.52 |
| O60443 | Non-syndromic hearing impairment protein 5<br>OS=Homo sapiens<br>GN=DFNA5<br>PE=1 SV=2 - [DFNA5_HUMAN]       | 27.02 | 1 | 12 | 12 | 39 | 0.510 | 0.541 | 0.803 | 0.612 | 84.99 | 27.02 | 22 | 39 | 496 | 54.5 | 5.17 |
| Q9UBS3 | DnaJ homolog subfamily B member 9<br>OS=Homo sapiens<br>GN=DNAJB9<br>PE=1 SV=1 - [DNJB9_HUMAN]               | 6.28  | 1 | 1  | 1  | 1  | 0.612 | 0.789 | 0.807 | 0.613 | 4.69  | 6.28  | 1  | 1  | 223 | 25.5 | 8.27 |
| Q9H5V8 | CUB domain-containing protein 1<br>OS=Homo sapiens<br>GN=CDCP1<br>PE=1 SV=3 - [CDCP1_HUMAN]                  | 9.93  | 1 | 3  | 3  | 3  | 0.518 | 1.217 | 0.662 | 0.613 | 0.00  | 9.93  | 3  | 3  | 836 | 92.9 | 7.96 |

|        |                                                                                                                         |       |   |    |    |     |       |       |       |       |        |       |    |     |      |       |      |
|--------|-------------------------------------------------------------------------------------------------------------------------|-------|---|----|----|-----|-------|-------|-------|-------|--------|-------|----|-----|------|-------|------|
| Q8IXM6 | Nurim<br>OS=Homo<br>sapiens<br>GN=NRM PE=1<br>SV=1 -<br>[NRM_HUMAN]                                                     | 6.11  | 1 | 1  | 1  | 1   | 1.064 | 1.017 | 1.219 | 0.613 | 0.00   | 6.11  | 1  | 1   | 262  | 29.4  | 8.63 |
| P49591 | Serine--tRNA<br>ligase,<br>cytoplasmic<br>OS=Homo<br>sapiens<br>GN=SARS<br>PE=1 SV=3 -<br>[SYSC_HUMAN]                  | 27.82 | 1 | 15 | 15 | 35  | 0.868 | 0.908 | 1.233 | 0.614 | 92.57  | 27.82 | 21 | 35  | 514  | 58.7  | 6.43 |
| P30536 | Translocator<br>protein<br>OS=Homo<br>sapiens<br>GN=TSPO<br>PE=1 SV=3 -<br>[TSPOA_HUMAN]                                | 9.47  | 1 | 2  | 2  | 11  | 0.631 | 0.488 | 0.652 | 0.614 | 24.05  | 9.47  | 3  | 11  | 169  | 18.8  | 9.36 |
| P08195 | 4F2 cell-<br>surface<br>antigen heavy<br>chain<br>OS=Homo<br>sapiens<br>GN=SLC3A2<br>PE=1 SV=3 -<br>[4F2_HUMAN]         | 28.73 | 1 | 17 | 17 | 84  | 0.767 | 0.404 | 0.597 | 0.614 | 225.03 | 28.73 | 30 | 84  | 630  | 68.0  | 5.01 |
| P49641 | Alpha-<br>mannosidase<br>2x OS=Homo<br>sapiens<br>GN=MAN2A2<br>PE=2 SV=3 -<br>[MA2A2_HUMAN]                             | 2.17  | 1 | 3  | 3  | 6   | 1.045 | 1.118 | 1.127 | 0.614 | 9.27   | 2.17  | 5  | 6   | 1150 | 130.5 | 6.84 |
| Q9UGI8 | Testin<br>OS=Homo<br>sapiens<br>GN=TES PE=1<br>SV=1 -<br>[TES_HUMAN]                                                    | 44.66 | 1 | 22 | 22 | 113 | 1.084 | 1.295 | 1.190 | 0.614 | 262.52 | 44.66 | 36 | 113 | 421  | 48.0  | 7.68 |
| Q7L8C5 | Synaptotagmin-<br>13 OS=Homo<br>sapiens<br>GN=SYT13<br>PE=1 SV=1 -<br>[SYT13_HUMAN]                                     | 4.46  | 1 | 1  | 1  | 1   | 1.899 | 1.513 | 0.999 | 0.614 | 0.00   | 4.46  | 1  | 1   | 426  | 46.9  | 7.66 |
| P02462 | Collagen alpha-<br>1(IV) chain<br>OS=Homo<br>sapiens<br>GN=COL4A1<br>PE=1 SV=3 -<br>[CO4A1_HUMAN]                       | 5.33  | 1 | 4  | 6  | 19  | 0.463 | 0.817 | 1.322 | 0.615 | 46.60  | 5.33  | 12 | 19  | 1669 | 160.5 | 8.28 |
| Q8NBM8 | Prenylcysteine<br>oxidase-like<br>OS=Homo<br>sapiens<br>GN=PCYOX1L<br>PE=1 SV=2 -<br>[PCYXL_HUMAN]                      | 4.25  | 1 | 2  | 2  | 3   | 0.719 | 1.208 | 0.917 | 0.615 | 5.87   | 4.25  | 3  | 3   | 494  | 54.6  | 7.31 |
| Q5VZK9 | Leucine-rich<br>repeat-<br>containing<br>protein 16A<br>OS=Homo<br>sapiens<br>GN=LRR16A<br>PE=1 SV=1 -<br>[LR16A_HUMAN] | 16.12 | 1 | 19 | 21 | 43  | 0.806 | 0.799 | 0.983 | 0.616 | 100.36 | 16.12 | 31 | 43  | 1371 | 151.5 | 7.85 |

|        |                                                                                                                                                |       |   |    |    |     |       |       |       |       |         |       |    |     |      |       |      |
|--------|------------------------------------------------------------------------------------------------------------------------------------------------|-------|---|----|----|-----|-------|-------|-------|-------|---------|-------|----|-----|------|-------|------|
| O14972 | Down syndrome critical region protein 3<br>OS=Homo sapiens<br>GN=DSCR3<br>PE=2 SV=1 - [DSCR3_HUMAN]                                            | 9.76  | 1 | 2  | 2  | 8   | 0.876 | 1.252 | 0.887 | 0.617 | 25.26   | 9.76  | 3  | 8   | 297  | 33.0  | 7.68 |
| O95340 | Bifunctional 3'-phosphoadenosine 5'-phosphosulfate synthase 2<br>OS=Homo sapiens<br>GN=PAPSS2<br>PE=1 SV=2 - [PAPSS2_HUMAN]                    | 32.25 | 1 | 16 | 18 | 105 | 0.958 | 0.567 | 0.702 | 0.617 | 258.82  | 32.25 | 28 | 105 | 614  | 69.5  | 8.03 |
| Q4LDE5 | Sushi, von Willebrand factor type A, EGF and pentraxin domain-containing protein 1<br>OS=Homo sapiens<br>GN=SVEP1<br>PE=1 SV=3 - [SVEP1_HUMAN] | 10.14 | 1 | 32 | 32 | 98  | 0.628 | 0.447 | 0.688 | 0.617 | 253.38  | 10.14 | 52 | 98  | 3571 | 389.9 | 5.50 |
| Q715N7 | Lysophosphatidylcholine acyltransferase 2<br>OS=Homo sapiens<br>GN=LPCAT2<br>PE=1 SV=1 - [PCAT2_HUMAN]                                         | 5.15  | 1 | 3  | 3  | 7   | 0.845 | 1.001 | 0.808 | 0.617 | 13.21   | 5.15  | 5  | 7   | 544  | 60.2  | 6.55 |
| Q12767 | Uncharacterized protein KIAA0195<br>OS=Homo sapiens<br>GN=KIAA0195<br>PE=1 SV=1 - [K0195_HUMAN]                                                | 3.76  | 1 | 2  | 2  | 5   | 1.358 | 0.588 | 1.083 | 0.618 | 11.78   | 3.76  | 3  | 5   | 1356 | 151.1 | 6.44 |
| Q68DD2 | Cytosolic phospholipase A2 zeta<br>OS=Homo sapiens<br>GN=PLA2G4F<br>PE=2 SV=3 - [PA24F_HUMAN]                                                  | 1.30  | 1 | 1  | 1  | 1   | 0.411 | 0.479 | 0.877 | 0.618 | 0.00    | 1.30  | 1  | 1   | 849  | 95.0  | 5.44 |
| P42224 | Signal transducer and activator of transcription 1-alpha/beta<br>OS=Homo sapiens<br>GN=STAT1<br>PE=1 SV=2 - [STAT1_HUMAN]                      | 57.87 | 1 | 50 | 50 | 800 | 1.361 | 0.465 | 1.063 | 0.618 | 2221.76 | 57.87 | 88 | 800 | 750  | 87.3  | 6.05 |

|        |                                                                                                                       |       |   |    |    |    |       |       |       |       |       |       |    |    |      |       |      |
|--------|-----------------------------------------------------------------------------------------------------------------------|-------|---|----|----|----|-------|-------|-------|-------|-------|-------|----|----|------|-------|------|
| Q10571 | Probable tumor suppressor protein MN1<br>OS=Homo sapiens<br>GN=MN1 PE=1 SV=3 - [MN1_HUMAN]                            | 0.53  | 1 | 1  | 1  | 1  | 0.523 | 0.996 | 0.880 | 0.618 | 0.00  | 0.53  | 1  | 1  | 1320 | 135.9 | 6.71 |
| P13761 | HLA class II histocompatibility antigen, DRB1-7 beta chain<br>OS=Homo sapiens<br>GN=HLA-DRB1 PE=1 SV=1 - [2B17_HUMAN] | 6.77  | 7 | 1  | 2  | 2  | 1.157 | 2.197 | 1.196 | 0.618 | 2.01  | 6.77  | 2  | 2  | 266  | 29.8  | 7.44 |
| Q5HYA8 | Meckelin<br>OS=Homo sapiens<br>GN=TMEM67 PE=1 SV=2 - [MKS3_HUMAN]                                                     | 1.21  | 1 | 1  | 1  | 1  | 0.904 | 0.786 | 0.603 | 0.619 | 0.00  | 1.21  | 1  | 1  | 995  | 111.7 | 6.77 |
| Q9UKU0 | Long-chain-fatty-acid--CoA ligase 6<br>OS=Homo sapiens<br>GN=ACSL6 PE=2 SV=4 - [ACSL6_HUMAN]                          | 5.60  | 1 | 2  | 4  | 10 | 0.725 | 0.724 | 1.170 | 0.619 | 14.17 | 5.60  | 6  | 10 | 697  | 77.7  | 7.43 |
| Q5T4B2 | Probable inactive glycosyltransferase 25 family member 3<br>OS=Homo sapiens<br>GN=CERCAM PE=2 SV=1 - [GT253_HUMAN]    | 12.44 | 1 | 7  | 7  | 37 | 0.763 | 0.689 | 0.973 | 0.619 | 87.43 | 12.44 | 14 | 37 | 595  | 67.5  | 6.06 |
| P61225 | Ras-related protein Rap-2b<br>OS=Homo sapiens<br>GN=RAP2B PE=1 SV=1 - [RAP2B_HUMAN]                                   | 31.15 | 1 | 5  | 7  | 19 | 0.633 | 0.866 | 0.544 | 0.620 | 46.38 | 31.15 | 11 | 19 | 183  | 20.5  | 4.81 |
| Q8TDB4 | Protein MGARP<br>OS=Homo sapiens<br>GN=MGARP PE=1 SV=1 - [HUMMR_HUMAN]                                                | 21.67 | 1 | 4  | 4  | 20 | 0.862 | 0.458 | 0.917 | 0.620 | 46.59 | 21.67 | 6  | 20 | 240  | 25.4  | 4.44 |
| Q96J65 | Multidrug resistance-associated protein 9<br>OS=Homo sapiens<br>GN=ABCC12 PE=1 SV=2 - [MRP9_HUMAN]                    | 2.72  | 1 | 2  | 3  | 13 | 0.655 | 0.624 | 1.299 | 0.621 | 27.91 | 2.72  | 4  | 13 | 1359 | 152.2 | 8.35 |
| O43157 | Plexin-B1<br>OS=Homo sapiens<br>GN=PLXNB1 PE=1 SV=3 - [PLXB1_HUMAN]                                                   | 5.34  | 2 | 10 | 10 | 25 | 0.976 | 0.867 | 0.971 | 0.622 | 43.88 | 5.34  | 14 | 25 | 2135 | 232.2 | 5.49 |

|        |                                                                                                                                          |       |   |    |    |     |       |       |       |       |        |       |    |     |     |      |      |
|--------|------------------------------------------------------------------------------------------------------------------------------------------|-------|---|----|----|-----|-------|-------|-------|-------|--------|-------|----|-----|-----|------|------|
| Q15118 | [Pyruvate dehydrogenase (acetyl-transferring)] kinase isozyme 1, mitochondrial<br>OS=Homo sapiens<br>GN=PDK1<br>PE=1 SV=1 - [PDK1_HUMAN] | 5.05  | 1 | 2  | 2  | 3   | 0.828 | 1.418 | 0.971 | 0.622 | 6.99   | 5.05  | 3  | 3   | 436 | 49.2 | 8.81 |
| Q9Y3B8 | Oligoribonuclease, mitochondrial<br>OS=Homo sapiens<br>GN=REXO2<br>PE=1 SV=3 - [ORN_HUMAN]                                               | 54.85 | 1 | 14 | 14 | 102 | 0.740 | 0.999 | 0.970 | 0.622 | 274.67 | 54.85 | 24 | 102 | 237 | 26.8 | 6.87 |
| O14893 | Gem-associated protein 2<br>OS=Homo sapiens<br>GN=GEMIN2<br>PE=1 SV=1 - [GEMIN2_HUMAN]                                                   | 11.43 | 1 | 2  | 2  | 4   | 1.108 | 1.170 | 1.375 | 0.623 | 11.72  | 11.43 | 3  | 4   | 280 | 31.6 | 5.58 |
| P0C1S8 | Wee1-like protein kinase 2<br>OS=Homo sapiens<br>GN=WEE2<br>PE=2 SV=2 - [WEE2_HUMAN]                                                     | 3.70  | 1 | 2  | 2  | 2   | 0.670 | 0.444 | 0.580 | 0.623 | 0.00   | 3.70  | 2  | 2   | 567 | 62.9 | 6.51 |
| Q9Y5U9 | Immediate early response 3-interacting protein 1<br>OS=Homo sapiens<br>GN=IER3IP1<br>PE=1 SV=1 - [IR3IP_HUMAN]                           | 34.15 | 1 | 2  | 2  | 6   | 0.855 | 0.592 | 0.536 | 0.624 | 25.39  | 34.15 | 2  | 6   | 82  | 9.0  | 8.22 |
| Q9Y570 | Protein phosphatase methylesterase 1<br>OS=Homo sapiens<br>GN=PPME1<br>PE=1 SV=3 - [PPME1_HUMAN]                                         | 44.82 | 1 | 13 | 14 | 56  | 1.274 | 0.550 | 0.858 | 0.625 | 131.14 | 44.82 | 23 | 56  | 386 | 42.3 | 5.97 |
| Q92629 | Delta-sarcoglycan<br>OS=Homo sapiens<br>GN=SGCD<br>PE=1 SV=2 - [SGCD_HUMAN]                                                              | 40.14 | 1 | 10 | 10 | 30  | 1.178 | 0.543 | 0.809 | 0.625 | 62.64  | 40.14 | 15 | 30  | 289 | 32.1 | 9.11 |
| Q92484 | Acid sphingomyelinase-like phosphodiesterase 3a<br>OS=Homo sapiens<br>GN=SMPDL3A<br>PE=1 SV=2 - [ASM3A_HUMAN]                            | 10.38 | 1 | 5  | 5  | 11  | 1.538 | 0.866 | 0.372 | 0.626 | 30.76  | 10.38 | 7  | 11  | 453 | 51.2 | 6.33 |

|        |                                                                                                                                        |       |   |   |    |     |       |       |       |       |        |       |    |     |      |       |      |
|--------|----------------------------------------------------------------------------------------------------------------------------------------|-------|---|---|----|-----|-------|-------|-------|-------|--------|-------|----|-----|------|-------|------|
| Q8N0W3 | L-fucose kinase<br>OS=Homo sapiens<br>GN=FUK PE=2<br>SV=2 -<br>[FUK_HUMAN]                                                             | 0.74  | 1 | 1 | 1  | 1   | 0.470 | 1.178 | 0.784 | 0.626 | 1.98   | 0.74  | 1  | 1   | 1084 | 117.5 | 6.25 |
| O60513 | Beta-1,4-galactosyltransferase 4<br>OS=Homo sapiens<br>GN=B4GALT4<br>PE=1 SV=1 -<br>[B4GT4_HUMAN]                                      | 6.40  | 1 | 2 | 2  | 5   | 0.565 | 0.539 | 0.899 | 0.626 | 17.37  | 6.40  | 2  | 5   | 344  | 40.0  | 9.07 |
| O75506 | Heat shock factor-binding protein 1<br>OS=Homo sapiens<br>GN=HSBP1<br>PE=1 SV=1 -<br>[HSBP1_HUMAN]                                     | 55.26 | 1 | 2 | 3  | 9   | 1.065 | 1.511 | 0.972 | 0.626 | 22.69  | 55.26 | 3  | 9   | 76   | 8.5   | 4.36 |
| Q15375 | Ephrin type-A receptor 7<br>OS=Homo sapiens<br>GN=EPHA7<br>PE=1 SV=3 -<br>[EPHA7_HUMAN]                                                | 3.81  | 8 | 2 | 4  | 5   | 0.806 | 0.845 | 1.162 | 0.627 | 8.80   | 3.81  | 5  | 5   | 998  | 112.0 | 5.80 |
| Q96MG8 | Protein-L-isoaspartate O-methyltransferase domain-containing protein 1<br>OS=Homo sapiens<br>GN=PCMTD1<br>PE=2 SV=2 -<br>[PCMD1_HUMAN] | 2.52  | 1 | 1 | 1  | 2   | 0.835 | 1.186 | 0.384 | 0.627 | 2.42   | 2.52  | 2  | 2   | 357  | 40.6  | 5.66 |
| Q14573 | Inositol 1,4,5-trisphosphate receptor type 3<br>OS=Homo sapiens<br>GN=ITPR3<br>PE=1 SV=2 -<br>[ITPR3_HUMAN]                            | 2.77  | 1 | 3 | 9  | 20  | 0.807 | 1.884 | 1.217 | 0.627 | 47.63  | 2.77  | 12 | 20  | 2671 | 303.9 | 6.48 |
| Q9NX08 | COMM domain-containing protein 8<br>OS=Homo sapiens<br>GN=COMMD8<br>PE=1 SV=1 -<br>[COMD8_HUMAN]                                       | 26.23 | 1 | 4 | 5  | 16  | 0.494 | 0.439 | 0.569 | 0.627 | 36.58  | 26.23 | 9  | 16  | 183  | 21.1  | 5.43 |
| Q6UWY0 | Arylsulfatase K<br>OS=Homo sapiens<br>GN=ARSK<br>PE=1 SV=1 -<br>[ARSK_HUMAN]                                                           | 6.34  | 1 | 3 | 3  | 8   | 1.228 | 1.370 | 1.241 | 0.628 | 21.95  | 6.34  | 6  | 8   | 536  | 61.4  | 8.92 |
| P53675 | Clathrin heavy chain 2<br>OS=Homo sapiens<br>GN=CLTCL1<br>PE=1 SV=2 -<br>[CLH2_HUMAN]                                                  | 10.12 | 1 | 1 | 19 | 209 | 1.289 | 0.171 | 0.286 | 0.628 | 509.60 | 10.12 | 32 | 209 | 1640 | 186.9 | 5.85 |

|        |                                                                                                                            |       |   |    |    |    |       |       |       |       |       |       |    |    |      |       |      |
|--------|----------------------------------------------------------------------------------------------------------------------------|-------|---|----|----|----|-------|-------|-------|-------|-------|-------|----|----|------|-------|------|
| Q6UWL6 | Kin of IRRE-like protein 2<br>OS=Homo sapiens<br>GN=KIRREL2<br>PE=1 SV=2 - [KIRRL2_HUMAN]                                  | 2.26  | 1 | 1  | 1  | 1  | 1.047 | 0.434 | 0.895 | 0.628 | 2.35  | 2.26  | 1  | 1  | 708  | 75.0  | 6.93 |
| Q6UX72 | UDP-GlcNAc:betaGal beta-1,3-N-acetylglucosaminyltransferase 9<br>OS=Homo sapiens<br>GN=B3GNT9<br>PE=2 SV=1 - [B3GN9_HUMAN] | 13.93 | 1 | 3  | 3  | 5  | 0.947 | 0.842 | 0.609 | 0.628 | 9.99  | 13.93 | 4  | 5  | 402  | 43.7  | 9.17 |
| P52790 | Hexokinase-3<br>OS=Homo sapiens<br>GN=HK3 PE=1 SV=2 - [HKK3_HUMAN]                                                         | 3.47  | 1 | 1  | 3  | 11 | 0.592 | 0.871 | 0.769 | 0.629 | 26.83 | 3.47  | 4  | 11 | 923  | 99.0  | 5.40 |
| Q9HD26 | Golgi-associated PDZ and coiled-coil motif-containing protein<br>OS=Homo sapiens<br>GN=GOPC<br>PE=1 SV=1 - [GOPC_HUMAN]    | 36.80 | 1 | 15 | 15 | 29 | 0.756 | 0.692 | 0.724 | 0.629 | 79.54 | 36.80 | 21 | 29 | 462  | 50.5  | 5.92 |
| O95405 | Zinc finger FYVE domain-containing protein 9<br>OS=Homo sapiens<br>GN=ZFYVE9<br>PE=1 SV=2 - [ZFYV9_HUMAN]                  | 0.63  | 1 | 1  | 1  | 2  | 0.713 | 0.717 | 1.033 | 0.629 | 4.61  | 0.63  | 2  | 2  | 1425 | 156.3 | 5.01 |
| Q8WX3  | Pyrin domain-containing protein 1<br>OS=Homo sapiens<br>GN=PYDC1<br>PE=1 SV=1 - [PYDC1_HUMAN]                              | 15.73 | 1 | 1  | 1  | 1  | 1.327 | 1.130 | 1.310 | 0.630 | 2.02  | 15.73 | 1  | 1  | 89   | 10.1  | 6.79 |
| Q86VQ1 | Glucocorticoid-induced transcript 1 protein<br>OS=Homo sapiens<br>GN=GLCCI1<br>PE=1 SV=1 - [GLCI1_HUMAN]                   | 6.40  | 1 | 1  | 1  | 2  | 1.186 | 1.603 | 1.802 | 0.630 | 3.44  | 6.40  | 1  | 2  | 547  | 58.0  | 9.44 |
| Q9UL62 | Short transient receptor potential channel 5<br>OS=Homo sapiens<br>GN=TRPC5<br>PE=1 SV=1 - [TRPCS_HUMAN]                   | 1.95  | 1 | 1  | 1  | 1  | 1.651 | 1.040 | 0.974 | 0.631 | 0.00  | 1.95  | 1  | 1  | 973  | 111.3 | 7.30 |



|        |                                                                                                                                             |       |   |    |    |    |       |       |       |       |        |       |    |    |     |      |      |
|--------|---------------------------------------------------------------------------------------------------------------------------------------------|-------|---|----|----|----|-------|-------|-------|-------|--------|-------|----|----|-----|------|------|
| Q9NRY6 | Phospholipid<br>scramblase 3<br>OS=Homo<br>sapiens<br>GN=PLSCR3<br>PE=1 SV=2 -<br>[PLS3_HUMAN]                                              | 13.22 | 1 | 3  | 3  | 7  | 1.077 | 1.140 | 1.083 | 0.631 | 9.99   | 13.22 | 5  | 7  | 295 | 31.6 | 6.65 |
| Q86WA9 | Sodium-<br>independent<br>sulfate anion<br>transporter<br>OS=Homo<br>sapiens<br>GN=SLC26A11<br>PE=2 SV=2 -<br>[S2611_HUMAN<br>]             | 2.31  | 1 | 1  | 2  | 4  | 0.926 | 3.140 | 1.170 | 0.631 | 9.96   | 2.31  | 2  | 4  | 606 | 65.3 | 7.31 |
| Q9H334 | Forkhead box<br>protein P1<br>OS=Homo<br>sapiens<br>GN=FOXP1<br>PE=1 SV=1 -<br>[FOXP1_HUMA<br>N]                                            | 1.33  | 1 | 1  | 1  | 2  | 0.954 | 1.495 | 1.362 | 0.631 | 0.00   | 1.33  | 1  | 2  | 677 | 75.3 | 6.67 |
| P16035 | Metalloprotein<br>ase inhibitor 2<br>OS=Homo<br>sapiens<br>GN=TIMP2<br>PE=1 SV=2 -<br>[TIMP2_HUMAN<br>]                                     | 6.82  | 1 | 1  | 1  | 6  | 0.599 | 0.908 | 0.826 | 0.631 | 10.22  | 6.82  | 2  | 6  | 220 | 24.4 | 7.49 |
| Q14314 | Fibroleukin<br>OS=Homo<br>sapiens<br>GN=FG2 PE=1<br>SV=1 -<br>[FGL2_HUMAN]                                                                  | 12.07 | 1 | 5  | 6  | 10 | 1.025 | 6.621 | 1.757 | 0.631 | 18.01  | 12.07 | 8  | 10 | 439 | 50.2 | 7.39 |
| P60891 | Ribose-<br>phosphate<br>pyrophosphokin<br>ase 1<br>OS=Homo<br>sapiens<br>GN=PRPS1<br>PE=1 SV=2 -<br>[PRPS1_HUMAN<br>]                       | 32.39 | 2 | 7  | 13 | 60 | 0.575 | 0.468 | 0.765 | 0.631 | 137.13 | 32.39 | 22 | 60 | 318 | 34.8 | 6.98 |
| P40123 | Adenylyl cyclase-<br>associated<br>protein 2<br>OS=Homo<br>sapiens<br>GN=CAP2<br>PE=1 SV=1 -<br>[CAP2_HUMAN]                                | 33.75 | 1 | 13 | 15 | 73 | 0.894 | 0.991 | 2.477 | 0.632 | 198.24 | 33.75 | 24 | 73 | 477 | 52.8 | 6.37 |
| P48426 | Phosphatidylo<br>sitol 5-<br>phosphate 4-<br>kinase type-2<br>alpha<br>OS=Homo<br>sapiens<br>GN=PIP4K2A<br>PE=1 SV=2 -<br>[PI42A_HUMAN<br>] | 26.35 | 1 | 5  | 11 | 26 | 0.629 | 0.999 | 1.217 | 0.632 | 50.75  | 26.35 | 16 | 26 | 406 | 46.2 | 6.99 |

|        |                                                                                                                                                |       |   |    |    |      |       |       |       |       |         |       |    |      |      |       |       |
|--------|------------------------------------------------------------------------------------------------------------------------------------------------|-------|---|----|----|------|-------|-------|-------|-------|---------|-------|----|------|------|-------|-------|
| Q86UG4 | Solute carrier<br>organic anion<br>transporter<br>family member<br>6A1 OS=Homo<br>sapiens<br>GN=SLCO6A1<br>PE=2 SV=2 -<br>[SO6A1_HUMAN]        | 1.25  | 1 | 1  | 1  | 1    | 0.873 |       | 3.062 | 0.632 | 0.00    | 1.25  | 1  | 1    | 719  | 79.2  | 8.59  |
| P50281 | Matrix<br>metalloproteinase-14<br>OS=Homo<br>sapiens<br>GN=MMP14<br>PE=1 SV=3 -<br>[MMP14_HUMAN]                                               | 12.89 | 3 | 8  | 8  | 30   | 0.719 | 0.883 | 0.769 | 0.633 | 57.45   | 12.89 | 14 | 30   | 582  | 65.9  | 7.77  |
| O60688 | Protein yippeelike 1<br>OS=Homo<br>sapiens<br>GN=YPELL<br>PE=2 SV=1 -<br>[YPELL_HUMAN]                                                         | 15.13 | 2 | 1  | 1  | 1    | 1.587 | 0.986 | 0.530 | 0.633 | 0.00    | 15.13 | 1  | 1    | 119  | 13.6  | 8.03  |
| P07951 | Tropomyosin<br>beta chain<br>OS=Homo<br>sapiens<br>GN=TPM2<br>PE=1 SV=1 -<br>[TPM2_HUMAN]                                                      | 83.80 | 1 | 23 | 51 | 1472 | 0.933 | 1.017 | 1.812 | 0.634 | 3382.28 | 83.80 | 80 | 1472 | 284  | 32.8  | 4.70  |
| Q5R314 | Tetratricopeptide repeat<br>protein 38<br>OS=Homo<br>sapiens<br>GN=TTC38<br>PE=1 SV=1 -<br>[TTC38_HUMAN]                                       | 6.40  | 1 | 3  | 3  | 10   | 1.496 | 1.064 | 0.742 | 0.634 | 19.78   | 6.40  | 5  | 10   | 469  | 52.8  | 5.99  |
| P30542 | Adenosine<br>receptor A1<br>OS=Homo<br>sapiens<br>GN=ADORA1<br>PE=1 SV=1 -<br>[AA1R_HUMAN]                                                     | 9.51  | 1 | 1  | 1  | 5    | 1.206 | 2.344 | 1.601 | 0.635 | 4.57    | 9.51  | 2  | 5    | 326  | 36.5  | 8.62  |
| P56556 | NADH<br>dehydrogenase<br>[ubiquinone] 1<br>alpha<br>subcomplex<br>subunit 6<br>OS=Homo<br>sapiens<br>GN=NDUFA6<br>PE=1 SV=3 -<br>[NDUA6_HUMAN] | 17.53 | 1 | 2  | 2  | 6    | 0.681 | 0.908 | 1.122 | 0.635 | 2.50    | 17.53 | 2  | 6    | 154  | 17.9  | 10.14 |
| O14917 | Protocadherin-17<br>OS=Homo<br>sapiens<br>GN=PCDH17<br>PE=2 SV=2 -<br>[PCD17_HUMAN]                                                            | 1.21  | 1 | 1  | 1  | 3    | 1.164 | 0.939 | 1.842 | 0.635 | 0.00    | 1.21  | 1  | 3    | 1159 | 126.2 | 5.19  |

|        |                                                                                                                                                                                                                                                  |       |   |    |    |    |       |       |       |       |        |       |    |    |     |       |      |
|--------|--------------------------------------------------------------------------------------------------------------------------------------------------------------------------------------------------------------------------------------------------|-------|---|----|----|----|-------|-------|-------|-------|--------|-------|----|----|-----|-------|------|
| A8K855 | EF-hand<br>calcium-binding<br>domain-<br>containing<br>protein 7<br>OS=Homo<br>sapiens<br>GN=EFCAB7<br>PE=2 SV=1 -<br>[EFCB7_HUMAN<br>]<br>BTB/POZ<br>domain-<br>containing<br>protein<br>KCTD12                                                 | 2.70  | 1 | 1  | 1  | 1  | 1.042 | 1.297 | 0.977 | 0.635 | 0.00   | 2.70  | 1  | 1  | 629 | 71.9  | 6.38 |
| Q96CX2 | OS=Homo<br>sapiens<br>GN=KCTD12<br>PE=1 SV=1 -<br>[KCD12_HUMAN<br>]<br>Polycystin-2<br>OS=Homo<br>sapiens<br>GN=PKD2<br>PE=1 SV=3 -<br>[PKD2_HUMAN]                                                                                              | 31.38 | 1 | 8  | 8  | 65 | 1.202 | 1.662 | 1.323 | 0.636 | 173.74 | 31.38 | 14 | 65 | 325 | 35.7  | 5.64 |
| Q13563 | Choline O-<br>acetyltransfera<br>se OS=Homo<br>sapiens<br>GN=CHAT<br>PE=1 SV=4 -<br>[CLAT_HUMAN]                                                                                                                                                 | 12.71 | 1 | 11 | 11 | 27 | 0.520 | 0.817 | 0.906 | 0.636 | 64.62  | 12.71 | 19 | 27 | 968 | 109.6 | 5.69 |
| P28329 | Coiled-coil<br>domain-<br>containing<br>protein lobo<br>homolog<br>OS=Homo<br>sapiens<br>GN=CCDC135<br>PE=2 SV=3 -<br>[CC135_HUMAN<br>]<br>RelA-associated<br>inhibitor<br>OS=Homo<br>sapiens<br>GN=PPP1R13L<br>PE=1 SV=4 -<br>[IASPP_HUMAN<br>] | 2.67  | 1 | 1  | 2  | 2  | 1.027 | 0.347 | 0.780 | 0.636 | 4.82   | 2.67  | 2  | 2  | 748 | 82.5  | 8.59 |
| Q8IY82 | Histone-lysine N-<br>methyltransfer<br>ase SMYD1<br>OS=Homo<br>sapiens<br>GN=SMYD1<br>PE=1 SV=1 -<br>[SMYD1_HUMA<br>N]                                                                                                                           | 1.95  | 1 | 2  | 3  | 3  | 0.831 | 1.251 | 1.295 | 0.636 | 7.28   | 1.95  | 3  | 3  | 874 | 103.4 | 5.67 |
| Q8WUF5 | Peroxisomal<br>acyl-coenzyme<br>A oxidase 2<br>OS=Homo<br>sapiens<br>GN=ACOX2<br>PE=1 SV=1 -<br>[ACOX2_HUMA<br>N]                                                                                                                                | 7.85  | 1 | 5  | 5  | 13 | 0.474 | 1.460 | 1.618 | 0.637 | 24.08  | 7.85  | 8  | 13 | 828 | 89.0  | 6.81 |
| Q8NB12 |                                                                                                                                                                                                                                                  | 2.86  | 1 | 1  | 1  | 1  | 2.737 | 0.834 | 1.824 | 0.637 | 2.98   | 2.86  | 1  | 1  | 490 | 56.6  | 7.09 |
| Q99424 |                                                                                                                                                                                                                                                  | 8.96  | 1 | 5  | 5  | 17 | 0.546 | 0.916 | 1.226 | 0.637 | 30.50  | 8.96  | 7  | 17 | 681 | 76.8  | 7.56 |

|        |                                                                                                   |       |   |   |   |     |       |       |       |       |        |       |    |     |      |       |      |
|--------|---------------------------------------------------------------------------------------------------|-------|---|---|---|-----|-------|-------|-------|-------|--------|-------|----|-----|------|-------|------|
| Q9H5Y7 | SLIT and NTRK-like protein 6<br>OS=Homo sapiens<br>GN=SLITRK6<br>PE=2 SV=3 - [SLIK6_HUMAN]        | 0.71  | 1 | 1 | 1 | 1   | 1.201 | 0.826 | 0.746 | 0.638 | 2.35   | 0.71  | 1  | 1   | 841  | 95.0  | 6.52 |
| Q96GE6 | Calmodulin-like protein 4<br>OS=Homo sapiens<br>GN=CALML4<br>PE=2 SV=3 - [CALL4_HUMAN]            | 6.12  | 1 | 1 | 1 | 3   | 0.822 | 0.907 | 0.637 | 0.638 | 4.41   | 6.12  | 1  | 3   | 196  | 21.9  | 7.53 |
| O43657 | Tetraspanin-6<br>OS=Homo sapiens<br>GN=TSPAN6<br>PE=1 SV=1 - [TSN6_HUMAN]                         | 3.27  | 1 | 1 | 1 | 2   | 0.986 | 0.616 | 0.938 | 0.638 | 4.05   | 3.27  | 2  | 2   | 245  | 27.5  | 8.10 |
| Q9C0D2 | Centrosomal protein of 295 kDa<br>OS=Homo sapiens<br>GN=CEP295<br>PE=2 SV=4 - [CE295_HUMAN]       | 1.08  | 2 | 2 | 4 | 7   | 1.185 | 1.144 | 1.173 | 0.638 | 14.16  | 1.08  | 4  | 7   | 2601 | 295.0 | 6.00 |
| Q9NWX6 | Probable tRNA(His) guanylyltransferase<br>OS=Homo sapiens<br>GN=THG1L<br>PE=1 SV=2 - [THG1_HUMAN] | 3.69  | 1 | 1 | 1 | 2   | 0.696 | 0.711 | 0.516 | 0.638 | 0.00   | 3.69  | 2  | 2   | 298  | 34.8  | 8.00 |
| P04114 | Apolipoprotein B-100<br>OS=Homo sapiens<br>GN=APOB<br>PE=1 SV=2 - [APOB_HUMAN]                    | 1.82  | 2 | 7 | 9 | 28  | 0.438 | 0.568 | 0.913 | 0.639 | 44.22  | 1.82  | 13 | 28  | 4563 | 515.3 | 7.05 |
| Q8N0Y7 | Probable phosphoglycerate mutase 4<br>OS=Homo sapiens<br>GN=PGAM4<br>PE=2 SV=1 - [PGAM4_HUMAN]    | 41.34 | 1 | 2 | 9 | 225 | 1.061 | 0.492 | 0.724 | 0.639 | 611.44 | 41.34 | 15 | 225 | 254  | 28.8  | 6.65 |
| Q99985 | Semaphorin-3C<br>OS=Homo sapiens<br>GN=SEMA3C<br>PE=1 SV=2 - [SEM3C_HUMAN]                        | 1.33  | 1 | 1 | 1 | 2   | 0.366 | 1.153 | 1.694 | 0.639 | 3.00   | 1.33  | 2  | 2   | 751  | 85.2  | 8.69 |
| P08493 | Matrix Gla protein<br>OS=Homo sapiens<br>GN=MGP<br>PE=1 SV=2 - [MGP_HUMAN]                        | 10.68 | 1 | 1 | 1 | 3   | 0.398 | 1.140 | 1.625 | 0.639 | 6.83   | 10.68 | 2  | 3   | 103  | 12.3  | 9.67 |

|        |                                                                                            |       |   |    |    |     |       |       |       |       |         |       |    |     |      |       |      |
|--------|--------------------------------------------------------------------------------------------|-------|---|----|----|-----|-------|-------|-------|-------|---------|-------|----|-----|------|-------|------|
| P28324 | ETS domain-containing protein Elk-4<br>OS=Homo sapiens<br>GN=ELK4 PE=1 SV=3 - [ELK4_HUMAN] | 2.09  | 1 | 1  | 1  | 1   | 0.556 | 0.671 | 1.235 | 0.639 | 2.18    | 2.09  | 1  | 1   | 431  | 46.9  | 7.91 |
| Q969T9 | WW domain-binding protein 2 OS=Homo sapiens<br>GN=WBP2 PE=1 SV=1 - [WBP2_HUMAN]            | 10.34 | 1 | 4  | 4  | 10  | 0.994 | 1.088 | 1.061 | 0.640 | 22.43   | 10.34 | 7  | 10  | 261  | 28.1  | 5.91 |
| Q05707 | Collagen alpha-1(XIV) chain OS=Homo sapiens<br>GN=COL14A1 PE=1 SV=3 - [COEA1_HUMAN]        | 24.00 | 1 | 34 | 34 | 108 | 0.683 | 0.679 | 0.198 | 0.640 | 241.68  | 24.00 | 55 | 108 | 1796 | 193.4 | 5.30 |
| P06737 | Glycogen phosphorylase, liver form OS=Homo sapiens<br>GN=PYGL PE=1 SV=4 - [PYGL_HUMAN]     | 39.43 | 1 | 27 | 34 | 136 | 0.739 | 0.678 | 0.725 | 0.640 | 329.26  | 39.43 | 56 | 136 | 847  | 97.1  | 7.17 |
| Q13023 | A-kinase anchor protein 6 OS=Homo sapiens<br>GN=AKAP6 PE=1 SV=3 - [AKAP6_HUMAN]            | 1.55  | 1 | 2  | 2  | 5   | 0.973 | 0.212 | 0.398 | 0.641 | 1.66    | 1.55  | 2  | 5   | 2319 | 256.6 | 5.01 |
| O75056 | Syndecan-3 OS=Homo sapiens<br>GN=SDC3 PE=1 SV=2 - [SDC3_HUMAN]                             | 3.85  | 1 | 1  | 1  | 1   | 0.923 | 2.307 | 2.645 | 0.642 | 3.26    | 3.85  | 1  | 1   | 442  | 45.5  | 4.69 |
| Q7Z4S6 | Kinesin-like protein KIF21A OS=Homo sapiens<br>GN=KIF21A PE=1 SV=2 - [KIF21A_HUMAN]        | 1.37  | 2 | 1  | 2  | 6   | 0.702 | 0.583 | 0.964 | 0.642 | 17.09   | 1.37  | 2  | 6   | 1674 | 187.1 | 6.42 |
| Q7Z406 | Myosin-14 OS=Homo sapiens<br>GN=MYH14 PE=1 SV=2 - [MYH14_HUMAN]                            | 10.58 | 1 | 4  | 24 | 520 | 0.792 | 0.450 | 0.633 | 0.642 | 1258.43 | 10.58 | 39 | 520 | 1995 | 227.7 | 5.60 |
| Q92968 | Peroxisomal membrane protein PEX13 OS=Homo sapiens<br>GN=PEX13 PE=1 SV=2 - [PEX13_HUMAN]   | 8.44  | 1 | 2  | 2  | 5   | 0.978 | 1.676 | 1.127 | 0.643 | 28.09   | 8.44  | 2  | 5   | 403  | 44.1  | 8.05 |

|        |                                                                                                         |       |   |    |    |      |       |       |       |       |        |       |    |      |      |       |       |
|--------|---------------------------------------------------------------------------------------------------------|-------|---|----|----|------|-------|-------|-------|-------|--------|-------|----|------|------|-------|-------|
| Q9C093 | Sperm flagellar protein 2<br>OS=Homo sapiens<br>GN=SPEF2<br>PE=1 SV=2 - [SPEF2_HUMAN]                   | 2.74  | 2 | 4  | 6  | 8    | 1.023 | 0.525 | 0.774 | 0.643 | 17.50  | 2.74  | 6  | 8    | 1822 | 209.7 | 5.54  |
| P54727 | UV excision repair protein RAD23 homolog B<br>OS=Homo sapiens<br>GN=RAD23B<br>PE=1 SV=1 - [RD23B_HUMAN] | 30.07 | 1 | 11 | 14 | 218  | 0.642 | 0.974 | 0.868 | 0.643 | 517.82 | 30.07 | 23 | 218  | 409  | 43.1  | 4.84  |
| Q86WT1 | Tetratricopeptide repeat protein 30A<br>OS=Homo sapiens<br>GN=TTC30A<br>PE=2 SV=3 - [TT30A_HUMAN]       | 3.01  | 1 | 1  | 1  | 1    | 1.060 | 0.790 | 1.530 | 0.643 | 4.31   | 3.01  | 1  | 1    | 665  | 76.1  | 5.20  |
| Q9H7X7 | Intraflagellar transport protein 22 homolog<br>OS=Homo sapiens<br>GN=IFT22<br>PE=2 SV=1 - [IFT22_HUMAN] | 12.97 | 1 | 2  | 2  | 5    | 1.302 | 0.801 | 0.780 | 0.644 | 10.50  | 12.97 | 3  | 5    | 185  | 20.8  | 5.15  |
| Q15833 | Syntaxin-binding protein 2<br>OS=Homo sapiens<br>GN=STXB2<br>PE=1 SV=2 - [STXB2_HUMAN]                  | 4.38  | 1 | 2  | 3  | 7    | 0.434 | 1.226 | 0.520 | 0.644 | 11.17  | 4.38  | 5  | 7    | 593  | 66.4  | 6.55  |
| Q96AQ1 | Coiled-coil domain-containing protein 74A<br>OS=Homo sapiens<br>GN=CCDC74A<br>PE=2 SV=1 - [CC74A_HUMAN] | 10.32 | 2 | 1  | 3  | 3    | 1.061 | 0.638 | 0.812 | 0.644 | 4.75   | 10.32 | 3  | 3    | 378  | 41.6  | 10.52 |
| Q8NEZ3 | WD repeat-containing protein 19<br>OS=Homo sapiens<br>GN=WDR19<br>PE=1 SV=2 - [WDR19_HUMAN]             | 0.60  | 1 | 1  | 1  | 1    | 0.999 | 0.900 | 0.594 | 0.644 | 0.00   | 0.60  | 1  | 1    | 1342 | 151.5 | 6.35  |
| P49589 | Cysteine--tRNA ligase, cytoplasmic<br>OS=Homo sapiens<br>GN=CARS<br>PE=1 SV=3 - [SYCC_HUMAN]            | 46.79 | 1 | 33 | 33 | 110  | 0.822 | 0.797 | 0.842 | 0.645 | 279.79 | 46.79 | 50 | 110  | 748  | 85.4  | 6.76  |
| P62736 | Actin, aortic smooth muscle<br>OS=Homo sapiens<br>GN=ACTA2<br>PE=1 SV=1 - [ACTA_HUMAN]                  | 77.45 | 2 | 3  | 35 | 4891 | 0.721 | 1.176 | 2.659 | 0.645 | #####  | 77.45 | 60 | 4891 | 377  | 42.0  | 5.39  |

|        |                                                                                                                                  |       |   |    |    |     |       |       |       |       |        |       |    |      |       |       |      |
|--------|----------------------------------------------------------------------------------------------------------------------------------|-------|---|----|----|-----|-------|-------|-------|-------|--------|-------|----|------|-------|-------|------|
| A8MZFO | Proline-rich protein 33<br>OS=Homo sapiens<br>GN=PRR33<br>PE=4 SV=2 - [PRR33_HUMAN]                                              | 4.83  | 1 | 1  | 1  | 4   | 0.724 | 0.531 | 0.770 | 0.646 | 3.21   | 4.83  | 2  | 4    | 331   | 35.2  | 8.35 |
| Q9UPZ3 | Hermansky-Pudlak syndrome 5 protein<br>OS=Homo sapiens<br>GN=HPS5<br>PE=1 SV=2 - [HPS5_HUMAN]                                    | 2.57  | 2 | 2  | 3  | 5   | 1.089 | 0.892 | 0.804 | 0.646 | 4.64   | 2.57  | 4  | 5    | 1129  | 127.4 | 5.54 |
| P11047 | Laminin subunit gamma-1<br>OS=Homo sapiens<br>GN=LAMC1<br>PE=1 SV=3 - [LAMC1_HUMAN]                                              | 21.88 | 1 | 34 | 34 | 149 | 0.756 | 0.733 | 1.066 | 0.647 | 370.09 | 21.88 | 57 | 149  | 1609  | 177.5 | 5.12 |
| Q9UNF0 | Protein kinase C and casein kinase substrate in neurons protein 2<br>OS=Homo sapiens<br>GN=PACSIN2<br>PE=1 SV=2 - [PACIN2_HUMAN] | 42.59 | 1 | 18 | 19 | 63  | 0.861 | 1.063 | 1.232 | 0.648 | 151.45 | 42.59 | 29 | 63   | 486   | 55.7  | 5.20 |
| Q9HCE0 | Ectopic P granules protein 5 homolog<br>OS=Homo sapiens<br>GN=EPG5<br>PE=2 SV=2 - [EPG5_HUMAN]                                   | 1.09  | 1 | 2  | 2  | 3   | 0.983 | 1.173 | 0.648 | 8.03  | 1.09   | 3     | 3  | 2579 | 292.3 | 6.43  |      |
| Q07837 | Neutral and basic amino acid transport protein rBAT<br>OS=Homo sapiens<br>GN=SLC3A1<br>PE=1 SV=2 - [SLC31_HUMAN]                 | 1.61  | 1 | 1  | 1  | 1   | 1.893 | 0.101 | 0.273 | 0.648 | 0.00   | 1.61  | 1  | 1    | 685   | 78.8  | 5.96 |
| Q9UPQ0 | LIM and calponin homology domains-containing protein 1<br>OS=Homo sapiens<br>GN=LIMCH1<br>PE=1 SV=4 - [LIMC1_HUMAN]              | 35.36 | 1 | 34 | 34 | 116 | 1.648 | 0.551 | 0.479 | 0.648 | 272.48 | 35.36 | 51 | 116  | 1083  | 121.8 | 6.47 |
| Q76LX8 | A disintegrin and metalloproteinase with thrombospondin motifs 13<br>OS=Homo sapiens<br>GN=ADAMTS13<br>PE=1 SV=1 - [ATS13_HUMAN] | 0.63  | 1 | 1  | 1  | 1   | 0.742 | 0.776 | 1.075 | 0.648 | 2.10   | 0.63  | 1  | 1    | 1427  | 153.5 | 7.17 |

|        |                                                                                                                       |       |     |    |    |     |       |       |       |       |         |       |    |     |      |       |      |
|--------|-----------------------------------------------------------------------------------------------------------------------|-------|-----|----|----|-----|-------|-------|-------|-------|---------|-------|----|-----|------|-------|------|
| P35749 | Myosin-11<br>OS=Homo sapiens<br>GN=MYH11<br>PE=1 SV=3 - [MYH11_HUMAN]                                                 | 28.65 | 1   | 24 | 62 | 942 | 0.320 | 0.713 | 0.482 | 0.648 | 2533.67 | 28.65 | 96 | 942 | 1972 | 227.2 | 5.50 |
| Q9Y4H2 | Insulin receptor substrate 2<br>OS=Homo sapiens<br>GN=IRS2 PE=1 SV=2 - [IRS2_HUMAN]                                   | 5.08  | 1   | 3  | 4  | 8   | 0.959 | 1.031 | 0.928 | 0.648 | 16.50   | 5.08  | 5  | 8   | 1338 | 137.2 | 8.65 |
| O14639 | Actin-binding LIM protein 1<br>OS=Homo sapiens<br>GN=ABLIM1<br>PE=1 SV=3 - [ABLIM1_HUMAN]                             | 6.94  | 1   | 3  | 4  | 5   | 0.738 | 2.067 | 1.197 | 0.648 | 7.08    | 6.94  | 5  | 5   | 778  | 87.6  | 8.59 |
| Q8NHP7 | Exonuclease 3'-5' domain-containing protein 1<br>OS=Homo sapiens<br>GN=EXD1<br>PE=2 SV=4 - [EXD1_HUMAN]               | 4.09  | 1   | 2  | 2  | 3   | 1.243 | 1.031 | 1.134 | 0.649 | 2.57    | 4.09  | 2  | 3   | 514  | 58.3  | 5.69 |
| P51884 | Lumican<br>OS=Homo sapiens<br>GN=LUM PE=1 SV=2 - [LUM_HUMAN]                                                          | 13.02 | 1   | 4  | 4  | 8   | 0.381 | 1.012 | 1.024 | 0.649 | 16.21   | 13.02 | 7  | 8   | 338  | 38.4  | 6.61 |
| Q9Y4D2 | Sn1-specific diacylglycerol lipase alpha<br>OS=Homo sapiens<br>GN=DAGLA<br>PE=1 SV=3 - [DGLA_HUMAN]                   | 1.82  | 1   | 2  | 2  | 2   | 0.671 | 0.665 | 0.769 | 0.649 | 0.00    | 1.82  | 2  | 2   | 1042 | 114.9 | 6.35 |
| Q8IVH4 | Methylmalonic adduct type A protein, mitochondrial<br>OS=Homo sapiens<br>GN=MMAA<br>PE=1 SV=1 - [MMAA_HUMAN]          | 5.74  | 1   | 2  | 2  | 3   | 0.888 | 6.371 | 1.732 | 0.649 | 8.33    | 5.74  | 2  | 3   | 418  | 46.5  | 9.29 |
| Q9NP58 | ATP-binding cassette sub-family B member 6, mitochondrial<br>OS=Homo sapiens<br>GN=ABCB6<br>PE=1 SV=1 - [ABCB6_HUMAN] | 6.77  | 1   | 4  | 4  | 18  | 1.096 | 1.130 | 1.016 | 0.650 | 19.41   | 6.77  | 5  | 18  | 842  | 93.8  | 8.48 |
| Q08AN1 | Zinc finger protein 616<br>OS=Homo sapiens<br>GN=ZNF616<br>PE=2 SV=2 - [ZNF616_HUMAN]                                 | 8.58  | 120 | 1  | 3  | 9   | 0.348 | 1.083 | 0.656 | 0.650 | 12.73   | 8.58  | 4  | 9   | 781  | 90.2  | 9.57 |



|        |                                                                                                               |       |   |    |    |     |       |       |       |       |        |       |    |     |      |       |      |
|--------|---------------------------------------------------------------------------------------------------------------|-------|---|----|----|-----|-------|-------|-------|-------|--------|-------|----|-----|------|-------|------|
| Q86VP1 | Tax1-binding protein 1<br>OS=Homo sapiens<br>GN=TAX1BP1<br>PE=1 SV=2 - [TAXB1_HUMAN]                          | 1.27  | 1 | 1  | 1  | 2   | 0.701 | 1.044 | 0.779 | 0.650 | 5.49   | 1.27  | 2  | 2   | 789  | 90.8  | 5.43 |
| Q58WW2 | DOB1- and CUL4-associated factor 6<br>OS=Homo sapiens<br>GN=DCAF6<br>PE=1 SV=1 - [DCAF6_HUMAN<br>Neurensin-2] | 6.86  | 1 | 6  | 6  | 7   | 0.563 | 0.908 | 0.908 | 0.650 | 14.58  | 6.86  | 6  | 7   | 860  | 96.2  | 5.27 |
| Q9GZP1 | OS=Homo sapiens<br>GN=NRSN2<br>PE=2 SV=1 - [NRSN2_HUMAN]                                                      | 13.24 | 1 | 2  | 2  | 3   | 0.569 | 1.927 | 1.593 | 0.650 | 5.83   | 13.24 | 2  | 3   | 204  | 22.0  | 4.83 |
| P17858 | ATP-dependent 6-phosphofructokinase, liver type<br>OS=Homo sapiens<br>GN=PFKL<br>PE=1 SV=6 - [PFKAL_HUMAN]    | 32.31 | 1 | 22 | 25 | 124 | 1.004 | 0.868 | 0.833 | 0.650 | 311.56 | 32.31 | 45 | 124 | 780  | 85.0  | 7.50 |
| Q969T3 | Sorting nexin-21<br>OS=Homo sapiens<br>GN=SNX21<br>PE=2 SV=1 - [SNX21_HUMAN]                                  | 6.17  | 1 | 2  | 2  | 6   | 0.822 | 1.501 | 1.025 | 0.651 | 8.93   | 6.17  | 3  | 6   | 373  | 41.3  | 5.24 |
| Q96AC1 | Fermitin family homolog 2<br>OS=Homo sapiens<br>GN=FERMT2<br>PE=1 SV=1 - [FERM2_HUMAN]                        | 42.65 | 2 | 27 | 28 | 134 | 0.813 | 0.911 | 1.049 | 0.651 | 322.99 | 42.65 | 43 | 134 | 680  | 77.8  | 6.70 |
| P53804 | E3 ubiquitin-protein ligase<br>TTC3<br>OS=Homo sapiens<br>GN=TTC3<br>PE=1 SV=2 - [TTC3_HUMAN]                 | 3.65  | 1 | 5  | 6  | 8   | 1.165 | 1.029 | 0.913 | 0.652 | 7.53   | 3.65  | 6  | 8   | 2025 | 229.7 | 7.52 |
| Q6ZW49 | PAX-interacting protein 1<br>OS=Homo sapiens<br>GN=PAXIP1<br>PE=1 SV=2 - [PAXI1_HUMAN]                        | 4.12  | 1 | 2  | 3  | 3   | 0.939 | 0.908 | 1.303 | 0.652 | 2.72   | 4.12  | 3  | 3   | 1069 | 121.3 | 6.70 |
| Q5VWN6 | Protein FAM208B<br>OS=Homo sapiens<br>GN=FAM208B<br>PE=1 SV=1 - [F208B_HUMAN]                                 | 1.93  | 2 | 3  | 5  | 8   | 1.181 | 0.591 | 0.728 | 0.653 | 10.42  | 1.93  | 5  | 8   | 2430 | 268.7 | 5.90 |

|        |                                                                                                    |       |   |    |    |    |       |       |       |       |       |       |    |    |      |       |      |
|--------|----------------------------------------------------------------------------------------------------|-------|---|----|----|----|-------|-------|-------|-------|-------|-------|----|----|------|-------|------|
| P21128 | Poly(U)-specific endoribonuclease OS=Homo sapiens GN=ENDOU PE=1 SV=2 - [ENDOU_HUMAN]               | 4.88  | 1 | 1  | 1  | 1  | 0.655 | 0.985 | 1.155 | 0.653 | 0.00  | 4.88  | 1  | 1  | 410  | 46.8  | 5.43 |
| Q7L0X2 | Glutamate-rich protein 6 OS=Homo sapiens GN=ERICH6 PE=2 SV=1 - [ERIP6_HUMAN]                       | 1.51  | 1 | 1  | 1  | 1  | 1.792 | 0.648 | 0.776 | 0.653 | 0.00  | 1.51  | 1  | 1  | 663  | 75.2  | 4.93 |
| Q6P4E1 | Protein CASC4 OS=Homo sapiens GN=CASC4 PE=1 SV=1 - [CASC4_HUMAN]                                   | 16.17 | 1 | 7  | 7  | 16 | 0.805 | 0.634 | 0.866 | 0.653 | 33.42 | 16.17 | 10 | 16 | 433  | 48.8  | 5.82 |
| P01023 | Alpha-2-macroglobulin OS=Homo sapiens GN=A2M PE=1 SV=3 - [A2MG_HUMAN]                              | 7.87  | 2 | 11 | 12 | 57 | 0.489 | 1.155 | 0.712 | 0.653 | 98.16 | 7.87  | 18 | 57 | 1474 | 163.2 | 6.46 |
| Q9HD23 | Magnesium transporter MRS2 homolog, mitochondrial OS=Homo sapiens GN=MRS2 PE=1 SV=1 - [MRS2_HUMAN] | 2.26  | 1 | 1  | 1  | 1  | 1.547 | 2.031 | 2.252 | 0.654 | 2.49  | 2.26  | 1  | 1  | 443  | 50.3  | 6.87 |
| Q99500 | Sphingosine 1-phosphate receptor 3 OS=Homo sapiens GN=S1PR3 PE=1 SV=2 - [S1PR3_HUMAN]              | 3.17  | 1 | 1  | 1  | 5  | 0.704 | 1.239 | 1.136 | 0.654 | 9.16  | 3.17  | 2  | 5  | 378  | 42.2  | 9.70 |
| Q96S97 | Myeloid-associated differentiation marker OS=Homo sapiens GN=MYADM PE=1 SV=2 - [MYADM_HUMAN]       | 3.42  | 1 | 1  | 1  | 5  | 0.701 | 0.411 | 0.531 | 0.654 | 17.83 | 3.42  | 2  | 5  | 322  | 35.3  | 8.15 |
| Q9HD15 | Steroid receptor RNA activator 1 OS=Homo sapiens GN=SRA1 PE=1 SV=1 - [SRA1_HUMAN]                  | 27.12 | 1 | 4  | 4  | 16 | 0.678 | 0.871 | 0.913 | 0.655 | 49.95 | 27.12 | 6  | 16 | 236  | 25.7  | 7.03 |
| Q9HB75 | p53-induced death domain-containing protein 1 OS=Homo sapiens GN=PID1 PE=1 SV=2 - [PID1_HUMAN]     | 5.49  | 1 | 2  | 2  | 2  | 1.933 | 0.515 | 1.070 | 0.655 | 5.00  | 5.49  | 2  | 2  | 910  | 99.6  | 6.43 |

|        |                                                                                                                                                                                                                        |       |   |    |    |     |       |       |       |       |        |       |    |     |     |       |       |
|--------|------------------------------------------------------------------------------------------------------------------------------------------------------------------------------------------------------------------------|-------|---|----|----|-----|-------|-------|-------|-------|--------|-------|----|-----|-----|-------|-------|
| Q92974 | Rho guanine<br>nucleotide<br>exchange<br>factor 2<br>OS=Homo<br>sapiens<br>GN=ARHGEF2<br>PE=1 SV=4 -<br>[ARHG2_HUMAN<br>SPATS2-like<br>protein<br>OS=Homo<br>sapiens<br>GN=SPATS2L<br>PE=1 SV=2 -<br>[SPS2L_HUMAN<br>] | 31.24 | 1 | 30 | 30 | 79  | 0.730 | 0.824 | 0.813 | 0.655 | 202.34 | 31.24 | 45 | 79  | 986 | 111.5 | 7.27  |
| Q9NUQ6 | Graves disease<br>carrier protein<br>OS=Homo<br>sapiens<br>GN=SLC25A16<br>PE=1 SV=3 -<br>[GDC_HUMAN]                                                                                                                   | 32.62 | 1 | 15 | 15 | 60  | 0.488 | 1.238 | 1.005 | 0.656 | 145.62 | 32.62 | 26 | 60  | 558 | 61.7  | 9.64  |
| P16260 | Uncharacterize<br>d protein<br>C8orf87<br>OS=Homo<br>sapiens<br>GN=C8orf87<br>PE=4 SV=1 -<br>[CH087_HUMAN<br>]                                                                                                         | 3.31  | 1 | 1  | 1  | 1   | 0.473 | 0.632 | 0.623 | 0.656 | 3.83   | 3.31  | 1  | 1   | 332 | 36.2  | 9.85  |
| E5R46  | RNA-binding<br>protein 34<br>OS=Homo<br>sapiens<br>GN=RBM34<br>PE=1 SV=2 -<br>[RBM34_HUMAN<br>]                                                                                                                        | 19.80 | 1 | 1  | 1  | 4   | 1.206 | 1.304 | 1.004 | 0.656 | 0.00   | 19.80 | 1  | 4   | 101 | 11.4  | 11.37 |
| P42696 | Glutamine--<br>fructose-6-<br>phosphate<br>aminotransfera<br>se [isomerizing]                                                                                                                                          | 8.14  | 1 | 3  | 3  | 11  | 0.668 | 0.998 | 0.651 | 0.656 | 31.78  | 8.14  | 4  | 11  | 430 | 48.5  | 10.11 |
| Q06210 | 1 OS=Homo<br>sapiens<br>GN=GFPT1<br>PE=1 SV=3 -<br>[GFPT1_HUMAN<br>]                                                                                                                                                   | 55.51 | 1 | 27 | 32 | 197 | 0.875 | 0.623 | 0.899 | 0.657 | 543.99 | 55.51 | 54 | 197 | 699 | 78.8  | 7.11  |
| Q9NR12 | PDZ and LIM<br>domain protein<br>7 OS=Homo<br>sapiens<br>GN=PDLM7<br>PE=1 SV=1 -<br>[PDLI7_HUMAN]                                                                                                                      | 65.43 | 1 | 22 | 23 | 160 | 0.852 | 0.926 | 1.202 | 0.657 | 293.13 | 65.43 | 36 | 160 | 457 | 49.8  | 8.41  |
| Q8NA70 | Protein<br>FAM47B<br>OS=Homo<br>sapiens<br>GN=FAM47B<br>PE=2 SV=2 -<br>[FA47B_HUMAN<br>]                                                                                                                               | 1.09  | 1 | 1  | 1  | 1   | 1.011 | 0.846 | 0.958 | 0.657 | 2.48   | 1.09  | 1  | 1   | 645 | 73.9  | 8.73  |
| O94829 | Importin-13<br>OS=Homo<br>sapiens<br>GN=IPO13<br>PE=1 SV=3 -<br>[IPO13_HUMAN<br>]                                                                                                                                      | 7.37  | 1 | 5  | 5  | 15  | 0.855 | 0.750 | 0.875 | 0.657 | 36.82  | 7.37  | 9  | 15  | 963 | 108.1 | 5.30  |

|        |                                                                                                                          |       |   |    |    |     |       |       |       |       |        |       |    |     |      |       |      |
|--------|--------------------------------------------------------------------------------------------------------------------------|-------|---|----|----|-----|-------|-------|-------|-------|--------|-------|----|-----|------|-------|------|
| Q9BZF9 | Uveal autoantigen with coiled-coil domains and ankyrin repeats<br>OS=Homo sapiens<br>GN=UACA<br>PE=1 SV=2 - [UACA_HUMAN] | 38.28 | 1 | 48 | 53 | 139 | 0.569 | 1.154 | 1.218 | 0.657 | 298.95 | 38.28 | 74 | 139 | 1416 | 162.4 | 7.03 |
| P43005 | Excitatory amino acid transporter 3<br>OS=Homo sapiens<br>GN=SLC1A1<br>PE=1 SV=2 - [EAA3_HUMAN]                          | 15.08 | 1 | 6  | 6  | 15  | 0.851 | 0.445 | 0.919 | 0.657 | 33.17  | 15.08 | 8  | 15  | 524  | 57.1  | 5.71 |
| Q6ZRS2 | Helicase SRCAP<br>OS=Homo sapiens<br>GN=SRCAP<br>PE=1 SV=3 - [SRCAP_HUMAN]                                               | 1.21  | 3 | 3  | 5  | 8   | 0.606 | 0.678 | 1.114 | 0.658 | 16.62  | 1.21  | 7  | 8   | 3230 | 343.3 | 5.96 |
| Q6P2I7 | Endogenous Bornavirus-like nucleoprotein 2<br>OS=Homo sapiens<br>GN=EBLN2<br>PE=2 SV=1 - [EBLN2_HUMAN]                   | 4.78  | 1 | 1  | 1  | 1   | 0.895 | 1.698 | 0.658 | 0.00  | 4.78   | 1     | 1  | 272 | 30.4 | 9.04  |      |
| P02794 | Ferritin heavy chain<br>OS=Homo sapiens<br>GN=FTH1<br>PE=1 SV=2 - [FRIH_HUMAN]                                           | 24.04 | 1 | 5  | 5  | 18  | 0.504 | 0.704 | 0.962 | 0.658 | 46.05  | 24.04 | 8  | 18  | 183  | 21.2  | 5.55 |
| P27540 | Aryl hydrocarbon receptor nuclear translocator<br>OS=Homo sapiens<br>GN=ARNT<br>PE=1 SV=1 - [ARNT_HUMAN]                 | 3.55  | 1 | 2  | 2  | 3   | 0.914 | 0.876 | 0.789 | 0.658 | 3.93   | 3.55  | 3  | 3   | 789  | 86.6  | 6.54 |
| O75629 | Protein CREG1<br>OS=Homo sapiens<br>GN=CREG1<br>PE=1 SV=1 - [CREG1_HUMAN]                                                | 5.45  | 1 | 1  | 1  | 4   | 0.508 | 0.815 | 0.701 | 0.658 | 4.82   | 5.45  | 2  | 4   | 220  | 24.1  | 7.59 |
| Q9BRT3 | Migration and invasion enhancer 1<br>OS=Homo sapiens<br>GN=MIEN1<br>PE=1 SV=1 - [MIEN1_HUMAN]                            | 33.04 | 1 | 6  | 6  | 30  | 0.688 | 0.742 | 0.771 | 0.658 | 73.18  | 33.04 | 9  | 30  | 115  | 12.4  | 4.37 |

|        |                                                                                                                            |       |   |    |    |    |       |       |       |       |        |       |    |    |      |       |      |
|--------|----------------------------------------------------------------------------------------------------------------------------|-------|---|----|----|----|-------|-------|-------|-------|--------|-------|----|----|------|-------|------|
| Q9P1Z2 | Calcium-binding and coiled-coil domain-containing protein 1<br>OS=Homo sapiens<br>GN=CALCOCO1<br>PE=1 SV=2 - [CACO1_HUMAN] | 12.74 | 2 | 7  | 9  | 24 | 0.950 | 0.948 | 1.034 | 0.658 | 50.73  | 12.74 | 11 | 24 | 691  | 77.3  | 4.82 |
| P28300 | Protein-lysine 6-oxidase<br>OS=Homo sapiens<br>GN=LOX PE=1 SV=2 - [LYOX_HUMAN]                                             | 35.49 | 1 | 9  | 9  | 21 | 0.274 | 0.425 | 1.078 | 0.658 | 47.10  | 35.49 | 13 | 21 | 417  | 46.9  | 8.09 |
| P60903 | Protein S100-A10 OS=Homo sapiens<br>GN=S100A10<br>PE=1 SV=2 - [S100AA_HUMAN]                                               | 46.39 | 1 | 8  | 8  | 55 | 1.568 | 1.988 | 1.389 | 0.658 | 99.28  | 46.39 | 12 | 55 | 97   | 11.2  | 7.37 |
| P26232 | Catenin alpha-2 OS=Homo sapiens<br>GN=CTNNA2<br>PE=1 SV=5 - [CTNA2_HUMAN]                                                  | 13.43 | 1 | 4  | 13 | 66 | 0.477 | 1.253 | 1.406 | 0.659 | 187.51 | 13.43 | 21 | 66 | 953  | 105.2 | 5.71 |
| P47974 | Zinc finger protein 36, C3H1 type-like 2 OS=Homo sapiens<br>GN=ZFP36L2<br>PE=1 SV=3 - [TISD_HUMAN]                         | 5.06  | 1 | 2  | 2  | 18 | 0.774 | 0.722 | 0.669 | 0.659 | 40.76  | 5.06  | 3  | 18 | 494  | 51.0  | 8.16 |
| P42262 | Glutamate receptor 2 OS=Homo sapiens<br>GN=GRIA2<br>PE=1 SV=3 - [GRIA2_HUMAN]                                              | 2.38  | 3 | 1  | 2  | 8  | 1.091 | 0.452 | 0.964 | 0.659 | 16.26  | 2.38  | 2  | 8  | 883  | 98.8  | 7.58 |
| P35573 | Glycogen debranching enzyme OS=Homo sapiens<br>GN=AGL PE=1 SV=3 - [GDE_HUMAN]                                              | 19.84 | 1 | 24 | 24 | 63 | 0.670 | 0.959 | 0.965 | 0.659 | 163.24 | 19.84 | 37 | 63 | 1532 | 174.7 | 6.76 |
| P58401 | Neurexin-2-beta OS=Homo sapiens<br>GN=NRXN2<br>PE=2 SV=1 - [NRX2B_HUMAN]                                                   | 5.26  | 2 | 2  | 3  | 8  | 1.185 | 0.479 | 0.925 | 0.659 | 1.80   | 5.26  | 3  | 8  | 666  | 70.9  | 6.38 |
| Q15527 | Surfeit locus protein 2 OS=Homo sapiens<br>GN=SURF2<br>PE=1 SV=3 - [SURF2_HUMAN]                                           | 5.08  | 1 | 1  | 1  | 4  | 0.594 | 0.698 | 1.471 | 0.659 | 11.67  | 5.08  | 1  | 4  | 256  | 29.6  | 9.22 |

|        |                                                                                                                     |       |   |   |   |    |       |       |       |       |       |       |   |     |      |      |      |
|--------|---------------------------------------------------------------------------------------------------------------------|-------|---|---|---|----|-------|-------|-------|-------|-------|-------|---|-----|------|------|------|
| P51151 | Ras-related protein Rab-9A<br>OS=Homo sapiens<br>GN=RAB9A<br>PE=1 SV=1 - [RAB9A_HUMAN]                              | 17.41 | 1 | 3 | 3 | 5  | 0.771 | 1.597 | 0.893 | 0.660 | 9.94  | 17.41 | 5 | 5   | 201  | 22.8 | 5.47 |
| A8MTJ3 | Guanine nucleotide-binding protein G(t) subunit alpha-3<br>OS=Homo sapiens<br>GN=GNAT3<br>PE=2 SV=2 - [GNAT3_HUMAN] | 7.34  | 2 | 1 | 4 | 36 | 1.047 | 0.641 | 0.465 | 0.660 | 98.73 | 7.34  | 7 | 36  | 354  | 40.3 | 6.01 |
| Q01459 | Di-N-acetylthitobiase<br>OS=Homo sapiens<br>GN=CTBS<br>PE=1 SV=1 - [DIAC_HUMAN]                                     | 6.23  | 1 | 2 | 2 | 6  | 0.782 | 1.617 | 1.319 | 0.660 | 9.80  | 6.23  | 4 | 6   | 385  | 43.7 | 6.64 |
| Q53EL6 | Programmed cell death protein 4<br>OS=Homo sapiens<br>GN=PDCD4<br>PE=1 SV=2 - [PDCD4_HUMAN]                         | 9.38  | 1 | 4 | 4 | 12 | 1.275 | 1.925 | 1.145 | 0.662 | 23.96 | 9.38  | 7 | 12  | 469  | 51.7 | 5.21 |
| P46527 | Cyclin-dependent kinase inhibitor 1B<br>OS=Homo sapiens<br>GN=CDKN1B<br>PE=1 SV=1 - [CDN1B_HUMAN]                   | 10.61 | 1 | 2 | 2 | 10 | 0.829 | 1.453 | 0.647 | 0.662 | 30.74 | 10.61 | 3 | 10  | 198  | 22.1 | 7.02 |
| P06454 | Prothymosin alpha<br>OS=Homo sapiens<br>GN=PTMA<br>PE=1 SV=2 - [PTMA_HUMAN]                                         | 9.91  | 1 | 1 | 1 | 6  | 0.704 | 0.752 | 0.662 | 12.33 | 9.91  | 1     | 6 | 111 | 12.2 | 3.78 |      |
| Q86XT4 | E3 ubiquitin-protein ligase TRIM50<br>OS=Homo sapiens<br>GN=TRIM50<br>PE=1 SV=1 - [TRIM50_HUMAN]                    | 5.34  | 3 | 1 | 2 | 5  | 1.018 | 1.118 | 1.017 | 0.662 | 11.08 | 5.34  | 2 | 5   | 487  | 54.7 | 7.49 |
| Q9P0S3 | ORM1-like protein 1<br>OS=Homo sapiens<br>GN=ORMDL1<br>PE=2 SV=1 - [ORML1_HUMAN]                                    | 11.76 | 1 | 1 | 1 | 2  | 0.898 | 0.702 | 0.858 | 0.662 | 0.00  | 11.76 | 1 | 2   | 153  | 17.4 | 9.64 |
| Q96LJ7 | Dehydrogenase/reductase SDR family member 1<br>OS=Homo sapiens<br>GN=DHRS1<br>PE=1 SV=1 - [DHRS1_HUMAN]             | 12.14 | 1 | 3 | 3 | 9  | 0.974 | 1.379 | 1.739 | 0.662 | 28.93 | 12.14 | 4 | 9   | 313  | 33.9 | 7.83 |

|        |                                                                                                                                                                                                                     |       |   |    |    |    |       |       |       |       |        |       |    |    |      |       |      |
|--------|---------------------------------------------------------------------------------------------------------------------------------------------------------------------------------------------------------------------|-------|---|----|----|----|-------|-------|-------|-------|--------|-------|----|----|------|-------|------|
| Q9HIE3 | Nuclear<br>ubiquitous<br>casein and<br>cyclin-<br>dependent<br>kinase<br>substrate 1<br>OS=Homo<br>sapiens<br>GN=NUCKS1<br>PE=1 SV=1 -<br>Transmembran<br>e and coiled-<br>coil domain-<br>containing<br>protein 3  | 13.58 | 1 | 4  | 4  | 23 | 0.868 | 1.020 | 0.893 | 0.663 | 45.60  | 13.58 | 7  | 23 | 243  | 27.3  | 5.08 |
| Q6UWJ1 | OS=Homo<br>sapiens<br>GN=TMCO3<br>PE=2 SV=1 -<br>[TMCO3_HUMA<br>N]                                                                                                                                                  | 2.81  | 1 | 2  | 2  | 4  | 1.730 | 0.556 | 1.561 | 0.663 | 10.15  | 2.81  | 2  | 4  | 677  | 75.5  | 6.90 |
| O00291 | Huntingtin-<br>interacting<br>protein 1<br>OS=Homo<br>sapiens<br>GN=HIP1 PE=1<br>SV=5 -<br>[HIP1_HUMAN]                                                                                                             | 24.01 | 1 | 24 | 26 | 72 | 0.629 | 1.074 | 0.941 | 0.663 | 160.33 | 24.01 | 40 | 72 | 1037 | 116.1 | 5.30 |
| Q6ZRF8 | RING finger<br>protein 207<br>OS=Homo<br>sapiens<br>GN=RN207<br>PE=2 SV=2 -<br>[RN207_HUMAN<br>]                                                                                                                    | 3.79  | 1 | 2  | 2  | 2  | 1.585 | 1.146 | 1.673 | 0.664 | 4.52   | 3.79  | 2  | 2  | 634  | 70.8  | 6.68 |
| Q9BZW7 | Testis-specific<br>gene 10<br>protein<br>OS=Homo<br>sapiens<br>GN=TSGA10<br>PE=1 SV=1 -<br>[TSG10_HUMAN<br>AP-4 complex<br>subunit epsilon-<br>1 OS=Homo<br>sapiens<br>GN=AP4E1<br>PE=1 SV=2 -<br>[AP4E1_HUMAN<br>] | 4.44  | 1 | 2  | 2  | 2  | 0.760 | 0.501 | 1.049 | 0.665 | 2.49   | 4.44  | 2  | 2  | 698  | 81.4  | 5.97 |
| Q9UPM8 | Acyl-CoA<br>synthetase<br>family member<br>4 OS=Homo<br>sapiens<br>GN=AASDH<br>PE=1 SV=3 -<br>[ACSF4_HUMAN<br>]                                                                                                     | 3.87  | 1 | 3  | 3  | 6  | 0.917 | 0.639 | 0.611 | 0.665 | 9.34   | 3.87  | 4  | 6  | 1137 | 127.2 | 5.99 |
| Q4L235 | Biglycan<br>OS=Homo<br>sapiens<br>GN=BGN PE=1<br>SV=2 -<br>[PGS1_HUMAN]                                                                                                                                             | 1.82  | 1 | 1  | 2  | 2  | 0.407 | 0.516 | 0.393 | 0.665 | 2.31   | 1.82  | 2  | 2  | 1098 | 122.5 | 7.24 |
| P21810 | Intercellular<br>adhesion<br>molecule 1<br>OS=Homo<br>sapiens<br>GN=ICAM1<br>PE=1 SV=2 -<br>[ICAM1_HUMAN<br>]                                                                                                       | 16.85 | 1 | 5  | 6  | 27 | 0.302 | 0.611 | 1.203 | 0.665 | 66.30  | 16.85 | 8  | 27 | 368  | 41.6  | 7.52 |
| P05362 | Intercellular<br>adhesion<br>molecule 1<br>OS=Homo<br>sapiens<br>GN=ICAM1<br>PE=1 SV=2 -<br>[ICAM1_HUMAN<br>]                                                                                                       | 20.30 | 1 | 9  | 10 | 49 | 1.049 | 1.521 | 1.617 | 0.665 | 129.63 | 20.30 | 18 | 49 | 532  | 57.8  | 7.99 |

|        |                                                                                                                     |       |   |   |   |    |       |       |       |       |       |       |    |    |      |       |      |
|--------|---------------------------------------------------------------------------------------------------------------------|-------|---|---|---|----|-------|-------|-------|-------|-------|-------|----|----|------|-------|------|
| Q68DX3 | FERM and PDZ domain-containing protein 2<br>OS=Homo sapiens<br>GN=FRMPD2<br>PE=1 SV=3 - [FRPD2_HUMAN]               | 4.43  | 1 | 3 | 3 | 4  | 0.875 | 1.494 | 1.088 | 0.665 | 2.09  | 4.43  | 3  | 4  | 1309 | 144.2 | 6.74 |
| Q9P2G4 | Microtubule-associated protein 10<br>OS=Homo sapiens<br>GN=MAP10<br>PE=1 SV=2 - [MAP10_HUMAN]                       | 0.66  | 1 | 1 | 1 | 1  | 0.348 | 0.762 | 0.840 | 0.666 | 1.65  | 0.66  | 1  | 1  | 905  | 100.3 | 7.17 |
| P57764 | Gasdermin-D<br>OS=Homo sapiens<br>GN=GSDMD<br>PE=1 SV=1 - [GSDMD_HUMAN]                                             | 15.29 | 1 | 7 | 7 | 27 | 1.230 | 1.107 | 0.817 | 0.666 | 75.01 | 15.29 | 11 | 27 | 484  | 52.8  | 5.08 |
| Q9UI32 | Glutaminase liver isoform, mitochondrial<br>OS=Homo sapiens<br>GN=GLS2 PE=1 SV=2 - [GLSL_HUMAN]                     | 3.99  | 1 | 1 | 2 | 2  | 0.749 | 0.995 | 0.578 | 0.666 | 5.57  | 3.99  | 2  | 2  | 602  | 66.3  | 7.30 |
| Q6MZM0 | Hephaestin-like protein 1<br>OS=Homo sapiens<br>GN=HEPHL1<br>PE=2 SV=2 - [HPHL1_HUMAN]                              | 0.69  | 1 | 1 | 1 | 1  | 1.046 | 0.795 | 0.932 | 0.666 | 2.89  | 0.69  | 1  | 1  | 1159 | 131.5 | 6.74 |
| Q9UP56 | Histone-lysine N-methyltransferase SETD1B<br>OS=Homo sapiens<br>GN=SETD1B<br>PE=1 SV=3 - [SET1B_HUMAN]              | 0.31  | 1 | 1 | 1 | 4  | 1.351 | 0.336 | 0.895 | 0.666 | 10.26 | 0.31  | 1  | 4  | 1966 | 212.7 | 4.96 |
| O75503 | Ceroid-lipofuscinosis neuronal protein 5<br>OS=Homo sapiens<br>GN=CLN5 PE=1 SV=2 - [CLN5_HUMAN]                     | 17.04 | 1 | 6 | 6 | 16 | 0.754 | 1.293 | 0.888 | 0.666 | 43.39 | 17.04 | 9  | 16 | 358  | 41.5  | 7.40 |
| O00743 | Serine/threonine-protein phosphatase 6 catalytic subunit<br>OS=Homo sapiens<br>GN=PPP6C<br>PE=1 SV=1 - [PPP6_HUMAN] | 11.80 | 1 | 4 | 4 | 9  | 0.962 | 0.792 | 0.664 | 0.666 | 20.66 | 11.80 | 5  | 9  | 305  | 35.1  | 5.69 |



|        |                                                                                                                                |       |   |    |    |     |       |       |       |       |         |       |    |     |      |       |      |
|--------|--------------------------------------------------------------------------------------------------------------------------------|-------|---|----|----|-----|-------|-------|-------|-------|---------|-------|----|-----|------|-------|------|
| Q8NB49 | Phospholipid-transporting ATPase IG<br>OS=Homo sapiens<br>GN=ATP11C<br>PE=1 SV=3 - [AT11C_HUMAN]                               | 5.21  | 1 | 5  | 5  | 13  | 0.943 | 0.719 | 0.793 | 0.666 | 31.86   | 5.21  | 8  | 13  | 1132 | 129.4 | 6.67 |
| O94955 | Rho-related BTB domain-containing protein 3<br>OS=Homo sapiens<br>GN=RHOBTB3<br>PE=1 SV=2 - [RHBT3_HUMAN]                      | 4.75  | 1 | 3  | 3  | 5   | 0.620 | 0.852 | 0.963 | 0.666 | 11.55   | 4.75  | 3  | 5   | 611  | 69.4  | 7.62 |
| P13489 | Ribonuclease inhibitor<br>OS=Homo sapiens<br>GN=RNHI<br>PE=1 SV=2 - [RINI_HUMAN]                                               | 38.83 | 2 | 16 | 18 | 405 | 0.776 | 0.733 | 1.023 | 0.667 | 1006.91 | 38.83 | 28 | 405 | 461  | 49.9  | 4.82 |
| P54802 | Alpha-N-acetylglucosaminidase<br>OS=Homo sapiens<br>GN=NAGLU<br>PE=1 SV=2 - [ANAG_HUMAN]                                       | 23.96 | 1 | 13 | 13 | 46  | 0.846 | 0.964 | 1.106 | 0.667 | 109.99  | 23.96 | 23 | 46  | 743  | 82.2  | 6.65 |
| Q9BTE1 | Dynactin subunit 5<br>OS=Homo sapiens<br>GN=DCTN5<br>PE=1 SV=1 - [DCTN5_HUMAN]                                                 | 9.89  | 1 | 2  | 2  | 2   | 0.705 | 0.740 | 1.046 | 0.668 | 2.21    | 9.89  | 2  | 2   | 182  | 20.1  | 8.02 |
| Q13557 | Calcium/calmodulin-dependent protein kinase type II subunit delta<br>OS=Homo sapiens<br>GN=CAMK2D<br>PE=1 SV=3 - [KCC2D_HUMAN] | 37.88 | 2 | 12 | 18 | 85  | 0.669 | 1.111 | 1.224 | 0.668 | 217.17  | 37.88 | 26 | 85  | 499  | 56.3  | 7.25 |
| Q86XE0 | Sorting nexin-32<br>OS=Homo sapiens<br>GN=SNX32<br>PE=2 SV=1 - [SNX32_HUMAN]                                                   | 4.47  | 1 | 1  | 2  | 3   | 1.101 | 0.817 | 1.134 | 0.668 | 7.84    | 4.47  | 2  | 3   | 403  | 46.4  | 7.09 |
| Q99732 | Lipopolysaccharide-induced tumor necrosis factor-alpha factor<br>OS=Homo sapiens<br>GN=LITAF<br>PE=1 SV=2 - [LITAF_HUMAN]      | 4.35  | 1 | 1  | 1  | 3   | 0.802 | 0.481 | 0.691 | 0.668 | 6.92    | 4.35  | 1  | 3   | 161  | 17.1  | 6.44 |
| P40145 | Adenylate cyclase type 8<br>OS=Homo sapiens<br>GN=ADCY8<br>PE=1 SV=1 - [ADCY8_HUMAN]                                           | 1.60  | 2 | 2  | 2  | 2   | 0.914 | 0.786 | 0.914 | 0.669 | 4.06    | 1.60  | 2  | 2   | 1251 | 140.0 | 6.99 |

|        |                                                                                                                             |       |   |    |    |    |       |       |       |       |        |       |    |    |      |       |      |
|--------|-----------------------------------------------------------------------------------------------------------------------------|-------|---|----|----|----|-------|-------|-------|-------|--------|-------|----|----|------|-------|------|
| Q92696 | Geranylgeranyl transferase type-2 subunit alpha<br>OS=Homo sapiens<br>GN=RABGGTA<br>PE=1 SV=2 - [PGTA_HUMAN]                | 22.40 | 1 | 12 | 12 | 36 | 0.867 | 0.713 | 0.911 | 0.669 | 76.64  | 22.40 | 19 | 36 | 567  | 65.0  | 5.67 |
| O15173 | Membrane-associated progesterone receptor component 2<br>OS=Homo sapiens<br>GN=PGRMC2<br>PE=1 SV=1 - [PGRC2_HUMAN]          | 31.84 | 1 | 9  | 11 | 66 | 1.039 | 0.698 | 0.517 | 0.669 | 156.39 | 31.84 | 19 | 66 | 223  | 23.8  | 4.88 |
| Q3B7J2 | Glucose-fructose oxidoreductase domain-containing protein 2<br>OS=Homo sapiens<br>GN=GFOD2<br>PE=2 SV=1 - [GFOD2_HUMAN]     | 1.56  | 1 | 1  | 1  | 1  | 1.000 | 0.792 | 0.906 | 0.669 | 1.96   | 1.56  | 1  | 1  | 385  | 42.2  | 6.44 |
| Q16798 | NADP-dependent malic enzyme, mitochondrial<br>OS=Homo sapiens<br>GN=ME3 PE=2 SV=2 - [MAON_HUMAN]                            | 4.30  | 1 | 2  | 3  | 16 | 0.632 | 1.310 | 0.599 | 0.669 | 28.76  | 4.30  | 4  | 16 | 604  | 67.0  | 7.97 |
| P17483 | Homeobox protein Hox-B4<br>OS=Homo sapiens<br>GN=HOXB4<br>PE=1 SV=2 - [HXB4_HUMAN]                                          | 6.37  | 1 | 1  | 1  | 1  | 1.644 | 0.969 | 1.091 | 0.669 | 0.00   | 6.37  | 1  | 1  | 251  | 27.6  | 9.77 |
| Q7Z4I7 | LIM and senescent cell antigen-like-containing domain protein 2<br>OS=Homo sapiens<br>GN=LIMS2<br>PE=1 SV=1 - [LIMS2_HUMAN] | 13.49 | 1 | 2  | 5  | 18 | 0.930 | 1.041 | 1.078 | 0.669 | 43.26  | 13.49 | 8  | 18 | 341  | 38.9  | 8.05 |
| O94854 | Uncharacterized protein KIAA0754<br>OS=Homo sapiens<br>GN=KIAA0754<br>PE=1 SV=4 - [K0754_HUMAN]                             | 1.70  | 1 | 2  | 2  | 3  | 0.965 | 0.638 | 0.980 | 0.669 | 4.33   | 1.70  | 2  | 3  | 1291 | 135.1 | 4.21 |
| P52429 | Dialcylglycerol kinase epsilon<br>OS=Homo sapiens<br>GN=DGKE<br>PE=1 SV=1 - [DGKE_HUMAN]                                    | 2.82  | 1 | 1  | 1  | 3  | 0.709 | 0.439 | 0.840 | 0.670 | 7.06   | 2.82  | 1  | 3  | 567  | 63.9  | 7.74 |

|        |                                                                                                                      |       |   |    |    |     |       |       |       |       |        |       |    |     |      |       |      |
|--------|----------------------------------------------------------------------------------------------------------------------|-------|---|----|----|-----|-------|-------|-------|-------|--------|-------|----|-----|------|-------|------|
| Q8NG78 | Olfactory receptor 8G5<br>OS=Homo sapiens<br>GN=OR8G5<br>PE=2 SV=2 - [OR8G5_HUMAN]                                   | 5.49  | 1 | 2  | 2  | 2   | 1.046 | 1.187 | 1.031 | 0.670 | 4.91   | 5.49  | 2  | 2   | 346  | 38.8  | 8.32 |
| P35221 | Catenin alpha-1<br>OS=Homo sapiens<br>GN=CTNNA1<br>PE=1 SV=1 - [CTNA1_HUMAN]                                         | 48.45 | 1 | 29 | 39 | 250 | 1.053 | 0.992 | 1.092 | 0.670 | 709.79 | 48.45 | 66 | 250 | 906  | 100.0 | 6.29 |
| P98082 | Disabled homolog 2<br>OS=Homo sapiens<br>GN=DAB2<br>PE=1 SV=3 - [DAB2_HUMAN]                                         | 37.66 | 1 | 25 | 25 | 150 | 0.757 | 0.402 | 0.661 | 0.670 | 361.86 | 37.66 | 43 | 150 | 770  | 82.4  | 5.53 |
| O75339 | Cartilage intermediate layer protein 1<br>OS=Homo sapiens<br>GN=CILP PE=1 SV=4 - [CILP1_HUMAN]                       | 1.52  | 2 | 2  | 2  | 6   | 0.846 | 0.547 | 0.493 | 0.671 | 11.27  | 1.52  | 2  | 6   | 1184 | 132.5 | 8.41 |
| Q8TBX8 | Phosphatidylinositol 5-phosphate 4-kinase type-2 gamma<br>OS=Homo sapiens<br>GN=PIP4K2C<br>PE=1 SV=3 - [PI42C_HUMAN] | 20.67 | 1 | 8  | 9  | 20  | 0.921 | 1.260 | 1.111 | 0.672 | 46.80  | 20.67 | 13 | 20  | 421  | 47.3  | 6.84 |
| Q9Y385 | Ubiquitin-conjugating enzyme E2 J1<br>OS=Homo sapiens<br>GN=UBE2J1<br>PE=1 SV=2 - [UB2J1_HUMAN]                      | 11.64 | 1 | 3  | 3  | 10  | 0.775 | 0.727 | 1.085 | 0.672 | 29.12  | 11.64 | 6  | 10  | 318  | 35.2  | 6.74 |
| Q9H920 | RING finger protein 121<br>OS=Homo sapiens<br>GN=RNF121<br>PE=1 SV=1 - [RNF121_HUMAN]                                | 5.20  | 1 | 1  | 1  | 1   | 0.660 | 0.490 | 0.506 | 0.672 | 5.86   | 5.20  | 1  | 1   | 327  | 37.9  | 7.06 |
| A8MUI8 | Putative UPF0607 protein<br>ENSP00000383<br>783 OS=Homo sapiens PE=3 SV=2 - [YA034_HUMAN]                            | 3.81  | 1 | 1  | 1  | 1   | 1.279 | 1.292 | 0.929 | 0.672 | 0.00   | 3.81  | 1  | 1   | 341  | 37.6  | 9.88 |
| Q14118 | Dystroglycan<br>OS=Homo sapiens<br>GN=DAG1<br>PE=1 SV=2 - [DAG1_HUMAN]                                               | 7.04  | 1 | 4  | 4  | 8   | 0.941 | 1.034 | 1.114 | 0.672 | 22.27  | 7.04  | 7  | 8   | 895  | 97.4  | 8.56 |

|        |                                                                                                                             |       |   |    |    |     |       |       |       |       |        |       |    |     |      |       |      |
|--------|-----------------------------------------------------------------------------------------------------------------------------|-------|---|----|----|-----|-------|-------|-------|-------|--------|-------|----|-----|------|-------|------|
| Q92546 | RAB6A-GEF complex partner protein 2<br>OS=Homo sapiens<br>GN=RGP1<br>PE=1 SV=1 - [RGP1_HUMAN]<br>Delta(24)-sterol reductase | 2.56  | 1 | 1  | 1  | 3   | 0.991 | 0.929 | 0.971 | 0.672 | 4.21   | 2.56  | 2  | 3   | 391  | 42.4  | 5.96 |
| Q15392 | OS=Homo sapiens<br>GN=DHCR24<br>PE=1 SV=2 - [DHCR24_HUMAN]<br>Dihydropyrimidinase-related protein 3                         | 18.22 | 1 | 8  | 8  | 31  | 0.658 | 0.242 | 0.666 | 0.672 | 76.46  | 18.22 | 15 | 31  | 516  | 60.1  | 8.16 |
| Q14195 | OS=Homo sapiens<br>GN=DPYSL3<br>PE=1 SV=1 - [DPYSL3_HUMAN]                                                                  | 57.37 | 1 | 20 | 24 | 232 | 0.909 | 1.761 | 1.509 | 0.673 | 665.53 | 57.37 | 41 | 232 | 570  | 61.9  | 6.49 |
| P41743 | Protein kinase C iota type<br>OS=Homo sapiens<br>GN=PRKCI<br>PE=1 SV=2 - [KPCI_HUMAN]                                       | 5.20  | 1 | 3  | 3  | 5   | 0.795 | 0.865 | 0.985 | 0.673 | 9.84   | 5.20  | 5  | 5   | 596  | 68.2  | 5.85 |
| O43752 | Syntaxin-6<br>OS=Homo sapiens<br>GN=STX6<br>PE=1 SV=1 - [STX6_HUMAN]                                                        | 12.94 | 1 | 3  | 3  | 8   | 0.561 | 0.801 | 0.786 | 0.673 | 16.68  | 12.94 | 6  | 8   | 255  | 29.2  | 4.93 |
| P31270 | Homeobox protein HoxA11<br>OS=Homo sapiens<br>GN=HOXA11<br>PE=2 SV=2 - [HXA11_HUMAN]                                        | 2.88  | 1 | 1  | 1  | 1   | 1.084 | 0.345 | 0.714 | 0.673 | 2.49   | 2.88  | 1  | 1   | 313  | 34.5  | 8.70 |
| Q8IWK6 | Probable G-protein coupled receptor 125<br>OS=Homo sapiens<br>GN=GPR125<br>PE=1 SV=2 - [GP125_HUMAN]                        | 2.57  | 1 | 2  | 2  | 6   | 0.705 | 0.998 | 2.015 | 0.674 | 2.98   | 2.57  | 2  | 6   | 1321 | 146.1 | 8.48 |
| Q9HBU5 | Major facilitator superfamily domain-containing protein 1<br>OS=Homo sapiens<br>GN=MFS1<br>PE=2 SV=2 - [MFS1_HUMAN]         | 4.30  | 1 | 2  | 2  | 14  | 0.843 | 0.798 | 0.833 | 0.674 | 19.82  | 4.30  | 4  | 14  | 465  | 51.2  | 6.74 |
| Q14332 | Frizzled-2<br>OS=Homo sapiens<br>GN=FZD2<br>PE=2 SV=1 - [FZD2_HUMAN]                                                        | 3.54  | 1 | 2  | 2  | 2   | 0.796 | 0.753 | 0.711 | 0.675 | 1.88   | 3.54  | 2  | 2   | 565  | 63.5  | 8.10 |

|        |                                                                                                            |       |   |    |    |     |       |       |       |       |        |       |    |     |      |       |      |
|--------|------------------------------------------------------------------------------------------------------------|-------|---|----|----|-----|-------|-------|-------|-------|--------|-------|----|-----|------|-------|------|
| O43739 | Cytchesin-3<br>OS=Homo sapiens<br>GN=CYTH3<br>PE=1 SV=2 - [CYH3_HUMAN]                                     | 6.75  | 3 | 2  | 3  | 4   | 0.799 | 0.810 | 1.188 | 0.675 | 8.84   | 6.75  | 4  | 4   | 400  | 46.3  | 5.47 |
| Q13642 | Four and a half LIM domains protein 1<br>OS=Homo sapiens<br>GN=FHL1 PE=1 SV=4 - [FHL1_HUMAN]               | 35.91 | 1 | 12 | 12 | 112 | 1.219 | 0.548 | 1.050 | 0.675 | 282.43 | 35.91 | 21 | 112 | 323  | 36.2  | 8.97 |
| Q8IU65 | Unconventional myosin-XVIIIB<br>OS=Homo sapiens<br>GN=MYO18B<br>PE=1 SV=1 - [MY18B_HUMAN]                  | 1.40  | 1 | 3  | 4  | 5   | 1.074 | 0.985 | 0.955 | 0.675 | 10.77  | 1.40  | 4  | 5   | 2567 | 285.0 | 6.90 |
| Q9H4I2 | Zinc fingers and homeoboxes protein 3<br>OS=Homo sapiens<br>GN=ZHX3<br>PE=1 SV=3 - [ZHX3_HUMAN]            | 2.41  | 1 | 2  | 3  | 3   | 0.825 | 0.736 | 1.130 | 0.675 | 4.27   | 2.41  | 3  | 3   | 956  | 104.6 | 6.07 |
| Q92520 | Protein FAM3C<br>OS=Homo sapiens<br>GN=FAM3C<br>PE=1 SV=1 - [FAM3C_HUMAN]                                  | 35.68 | 1 | 8  | 8  | 42  | 0.616 | 0.762 | 0.945 | 0.676 | 96.08  | 35.68 | 13 | 42  | 227  | 24.7  | 8.29 |
| O14730 | Serine/threonine-protein kinase RIO3<br>OS=Homo sapiens<br>GN=RIOK3<br>PE=1 SV=2 - [RIOK3_HUMAN]           | 5.59  | 1 | 3  | 3  | 8   | 1.153 | 1.050 | 1.058 | 0.676 | 4.27   | 5.59  | 4  | 8   | 519  | 59.1  | 5.76 |
| P07947 | Tyrosine-protein kinase Yes<br>OS=Homo sapiens<br>GN=YES1<br>PE=1 SV=3 - [YES_HUMAN]                       | 15.65 | 7 | 1  | 9  | 54  | 0.850 | 1.216 | 0.813 | 0.676 | 116.33 | 15.65 | 17 | 54  | 543  | 60.8  | 6.74 |
| Q56VL3 | OCIA domain-containing protein 2<br>OS=Homo sapiens<br>GN=OCAD2<br>PE=1 SV=1 - [OCAD2_HUMAN]               | 20.13 | 1 | 3  | 3  | 9   | 0.454 | 2.162 | 1.004 | 0.676 | 20.81  | 20.13 | 4  | 9   | 154  | 16.9  | 9.03 |
| Q9NWZ3 | Adaptin ear-binding coat-associated protein 2<br>OS=Homo sapiens<br>GN=NECAP2<br>PE=1 SV=1 - [NECP2_HUMAN] | 24.71 | 1 | 5  | 6  | 15  | 0.920 | 0.826 | 0.888 | 0.677 | 36.33  | 24.71 | 8  | 15  | 263  | 28.3  | 8.38 |

|        |                                                                                                                                                                                                                                                                                                                                                  |       |   |     |     |      |       |       |       |       |         |       |     |      |      |       |       |
|--------|--------------------------------------------------------------------------------------------------------------------------------------------------------------------------------------------------------------------------------------------------------------------------------------------------------------------------------------------------|-------|---|-----|-----|------|-------|-------|-------|-------|---------|-------|-----|------|------|-------|-------|
| Q5T4F7 | Secreted<br>frizzled-related<br>protein 5<br>OS=Homo<br>sapiens<br>GN=SFRP5<br>PE=2 SV=3 -<br>[SFRP5_HUMAN<br>Dna] homolog<br>subfamily B<br>member 6<br>OS=Homo<br>sapiens<br>GN=DNAJB6<br>PE=1 SV=2 -<br>[DNAJB6_HUMAN<br>]<br>COMM domain-<br>containing<br>protein 4<br>OS=Homo<br>sapiens<br>GN=COMMD4<br>PE=1 SV=1 -<br>[COMMD4_HUMA<br>N] | 1.89  | 1 | 1   | 1   | 1    | 0.524 | 0.846 | 0.709 | 0.678 | 1.86    | 1.89  | 1   | 1    | 317  | 35.5  | 8.56  |
| Q75190 | Filamin-C<br>OS=Homo<br>sapiens<br>GN=FLNC PE=1<br>SV=3 -<br>[FLNC_HUMAN]                                                                                                                                                                                                                                                                        | 22.09 | 3 | 4   | 6   | 20   | 1.446 | 1.919 | 1.125 | 0.678 | 61.39   | 22.09 | 8   | 20   | 326  | 36.1  | 9.16  |
| Q9H0A8 | Stonin-2<br>OS=Homo<br>sapiens<br>GN=STON2<br>PE=1 SV=1 -<br>[STON2_HUMA<br>N]<br>Zinc finger<br>CCCH domain-<br>containing<br>protein 3<br>OS=Homo<br>sapiens<br>GN=ZC3H3<br>PE=1 SV=3 -<br>[ZC3H3_HUMAN<br>]<br>Inosine-5'-<br>monophosphat<br>e<br>dehydrogenase<br>1 OS=Homo<br>sapiens<br>GN=IMPDH1<br>PE=1 SV=2 -<br>[IMDH1_HUMAN<br>]     | 9.05  | 1 | 2   | 2   | 8    | 0.761 | 0.570 | 0.633 | 0.679 | 17.69   | 9.05  | 3   | 8    | 199  | 21.8  | 7.31  |
| Q14315 | Testis-<br>expressed<br>sequence 2<br>protein<br>OS=Homo<br>sapiens<br>GN=TEX2<br>PE=1 SV=2 -<br>[TEX2_HUMAN]                                                                                                                                                                                                                                    | 67.27 | 1 | 145 | 165 | 2369 | 0.573 | 0.870 | 1.450 | 0.680 | 6058.40 | 67.27 | 274 | 2369 | 2725 | 290.8 | 5.97  |
| Q8WXE9 | Hemopexin<br>OS=Homo<br>sapiens<br>GN=HPX PE=1<br>SV=2 -<br>[HEMO_HUMAN<br>]                                                                                                                                                                                                                                                                     | 0.99  | 1 | 1   | 1   | 7    | 1.356 | 1.010 | 1.443 | 0.680 | 16.35   | 0.99  | 2   | 7    | 905  | 101.1 | 5.39  |
| Q8IXZ2 |                                                                                                                                                                                                                                                                                                                                                  | 4.11  | 1 | 2   | 2   | 2    | 0.827 | 1.017 | 1.003 | 0.680 | 0.00    | 4.11  | 2   | 2    | 948  | 101.9 | 10.95 |
| P20839 |                                                                                                                                                                                                                                                                                                                                                  | 15.56 | 1 | 5   | 9   | 48   | 0.541 | 0.563 | 0.602 | 0.680 | 98.96   | 15.56 | 16  | 48   | 514  | 55.4  | 6.90  |
| Q8IWB9 |                                                                                                                                                                                                                                                                                                                                                  | 4.79  | 1 | 5   | 5   | 13   | 0.647 | 1.142 | 1.112 | 0.681 | 26.08   | 4.79  | 8   | 13   | 1127 | 125.2 | 6.01  |
| P02790 |                                                                                                                                                                                                                                                                                                                                                  | 1.30  | 1 | 1   | 1   | 2    | 0.565 | 0.829 | 0.697 | 0.681 | 4.26    | 1.30  | 1   | 2    | 462  | 51.6  | 7.02  |

|        |                                                                                                                                                       |       |   |    |    |     |       |       |       |       |        |       |    |     |      |       |      |
|--------|-------------------------------------------------------------------------------------------------------------------------------------------------------|-------|---|----|----|-----|-------|-------|-------|-------|--------|-------|----|-----|------|-------|------|
| P23469 | Receptor-type<br>tyrosine-<br>protein<br>phosphatase<br>epsilon<br>OS=Homo<br>sapiens<br>GN=PTPRE<br>PE=1 SV=1 -<br>[PTPRE_HUMAN]                     | 0.86  | 1 | 1  | 1  | 5   | 0.983 | 0.957 | 1.153 | 0.681 | 10.96  | 0.86  | 1  | 5   | 700  | 80.6  | 7.02 |
| Q8NBS9 | Thioredoxin<br>domain-<br>containing<br>protein 5<br>OS=Homo<br>sapiens<br>GN=TXNDC5<br>PE=1 SV=2 -<br>[TXNDS_HUMAN<br>]                              | 45.60 | 1 | 21 | 23 | 250 | 0.653 | 0.785 | 0.694 | 0.681 | 562.48 | 45.60 | 35 | 250 | 432  | 47.6  | 5.97 |
| Q13094 | Lymphocyte<br>cytosolic<br>protein 2<br>OS=Homo<br>sapiens<br>GN=LCP2 PE=1<br>SV=1 -<br>[LCP2_HUMAN]                                                  | 1.88  | 1 | 1  | 1  | 2   | 1.082 | 1.026 | 1.729 | 0.681 | 0.00   | 1.88  | 1  | 2   | 533  | 60.2  | 6.27 |
| Q13322 | Growth factor<br>receptor-<br>bound protein<br>10 OS=Homo<br>sapiens<br>GN=GRB10<br>PE=1 SV=2 -<br>[GRB10_HUMAN<br>]                                  | 1.52  | 1 | 1  | 1  | 2   | 0.727 | 0.856 | 1.315 | 0.681 | 4.00   | 1.52  | 2  | 2   | 594  | 67.2  | 7.87 |
| Q9HCJ6 | Synaptic veside<br>membrane<br>protein VAT-1<br>homolog-like<br>OS=Homo<br>sapiens<br>GN=VAT1L<br>PE=1 SV=2 -<br>[VAT1L_HUMAN<br>]                    | 1.67  | 1 | 1  | 1  | 1   | 2.018 | 0.924 | 2.434 | 0.681 | 2.95   | 1.67  | 1  | 1   | 419  | 45.9  | 5.06 |
| Q9NZQ8 | Transient<br>receptor<br>potential<br>cation channel<br>subfamily M<br>member 5<br>OS=Homo<br>sapiens<br>GN=TRPM5<br>PE=2 SV=1 -<br>[TRPM5_HUMA<br>N] | 2.06  | 1 | 3  | 3  | 3   | 0.862 | 0.913 | 1.174 | 0.681 | 6.83   | 2.06  | 3  | 3   | 1165 | 131.4 | 6.77 |
| P78563 | Double-<br>stranded RNA-<br>specific editase<br>1 OS=Homo<br>sapiens<br>GN=ADARB1<br>PE=1 SV=1 -<br>[REDI_HUMAN]                                      | 4.72  | 1 | 3  | 3  | 8   | 0.719 | 2.450 | 2.645 | 0.681 | 16.07  | 4.72  | 4  | 8   | 741  | 80.7  | 9.01 |
| P23634 | Plasma<br>membrane<br>calcium-<br>transporting<br>ATPase 4<br>OS=Homo<br>sapiens<br>GN=ATP2B4<br>PE=1 SV=2 -<br>[AT2B4_HUMAN<br>]                     | 36.02 | 1 | 25 | 43 | 191 | 0.856 | 1.431 | 1.172 | 0.682 | 458.06 | 36.02 | 74 | 191 | 1241 | 137.8 | 6.60 |

|        |                                                                                                                                                                                                                                                                                                                                                                                                                                                                                                                                                                                                                                                                                                                                                                                                                                                                                                                                                                                                         |       |   |   |   |    |       |       |       |       |       |       |    |    |      |       |      |
|--------|---------------------------------------------------------------------------------------------------------------------------------------------------------------------------------------------------------------------------------------------------------------------------------------------------------------------------------------------------------------------------------------------------------------------------------------------------------------------------------------------------------------------------------------------------------------------------------------------------------------------------------------------------------------------------------------------------------------------------------------------------------------------------------------------------------------------------------------------------------------------------------------------------------------------------------------------------------------------------------------------------------|-------|---|---|---|----|-------|-------|-------|-------|-------|-------|----|----|------|-------|------|
| Q7Z6J2 | General<br>receptor for<br>phosphoinositid<br>es 1-associated<br>scaffold<br>protein<br>OS=Homo<br>sapiens<br>GN=GRASP<br>PE=1 SV=1 -<br>[GRASP_HUMAN<br>Transient<br>receptor<br>potential<br>cation channel<br>subfamily M<br>member 7<br>OS=Homo<br>sapiens<br>GN=TRPM7<br>PE=1 SV=1 -<br>[TRPM7_HUMA<br>N]<br>ARL14 effector<br>protein-like<br>OS=Homo<br>sapiens<br>GN=ARL14EPL<br>PE=4 SV=1 -<br>[A14EL_HUMAN<br>]<br>Mannose-P-<br>dolichol<br>utilization<br>defect 1<br>protein<br>OS=Homo<br>sapiens<br>GN=MPDU1<br>PE=1 SV=2 -<br>[MPU1_HUMAN]<br>Zinc finger B-<br>box domain-<br>containing<br>protein 1<br>OS=Homo<br>sapiens<br>GN=ZBBX<br>PE=2 SV=3 -<br>[ZBBX_HUMAN]<br>SRSF protein<br>kinase 2<br>OS=Homo<br>sapiens<br>GN=SRPK2<br>PE=1 SV=3 -<br>[SRPK2_HUMAN<br>]<br>Kinesin-like<br>protein KIF3C<br>OS=Homo<br>sapiens<br>GN=KIF3C<br>PE=1 SV=3 -<br>[KIF3C_HUMAN<br>]<br>Putative<br>hydrolase<br>RBBP9<br>OS=Homo<br>sapiens<br>GN=RBBP9<br>PE=1 SV=2 -<br>[RBBP9_HUMAN<br>] | 1.52  | 1 | 1 | 1 | 1  | 0.838 | 0.707 | 0.874 | 0.682 | 1.83  | 1.52  | 1  | 1  | 395  | 42.6  | 8.84 |
| Q96QT4 | ARL14 effector<br>protein-like<br>OS=Homo<br>sapiens<br>GN=TRPM7<br>PE=1 SV=1 -<br>[TRPM7_HUMA<br>N]<br>ARL14 effector<br>protein-like<br>OS=Homo<br>sapiens<br>GN=ARL14EPL<br>PE=4 SV=1 -<br>[A14EL_HUMAN<br>]<br>Mannose-P-<br>dolichol<br>utilization<br>defect 1<br>protein<br>OS=Homo<br>sapiens<br>GN=MPDU1<br>PE=1 SV=2 -<br>[MPU1_HUMAN]<br>Zinc finger B-<br>box domain-<br>containing<br>protein 1<br>OS=Homo<br>sapiens<br>GN=ZBBX<br>PE=2 SV=3 -<br>[ZBBX_HUMAN]<br>SRSF protein<br>kinase 2<br>OS=Homo<br>sapiens<br>GN=SRPK2<br>PE=1 SV=3 -<br>[SRPK2_HUMAN<br>]<br>Kinesin-like<br>protein KIF3C<br>OS=Homo<br>sapiens<br>GN=KIF3C<br>PE=1 SV=3 -<br>[KIF3C_HUMAN<br>]<br>Putative<br>hydrolase<br>RBBP9<br>OS=Homo<br>sapiens<br>GN=RBBP9<br>PE=1 SV=2 -<br>[RBBP9_HUMAN<br>]                                                                                                                                                                                                           | 0.86  | 1 | 2 | 2 | 3  | 0.587 | 0.611 | 0.649 | 0.682 | 5.34  | 0.86  | 2  | 3  | 1865 | 212.6 | 7.88 |
| P0DKL9 | ARL14 effector<br>protein-like<br>OS=Homo<br>sapiens<br>GN=ARL14EPL<br>PE=4 SV=1 -<br>[A14EL_HUMAN<br>]<br>Mannose-P-<br>dolichol<br>utilization<br>defect 1<br>protein<br>OS=Homo<br>sapiens<br>GN=MPDU1<br>PE=1 SV=2 -<br>[MPU1_HUMAN]<br>Zinc finger B-<br>box domain-<br>containing<br>protein 1<br>OS=Homo<br>sapiens<br>GN=ZBBX<br>PE=2 SV=3 -<br>[ZBBX_HUMAN]<br>SRSF protein<br>kinase 2<br>OS=Homo<br>sapiens<br>GN=SRPK2<br>PE=1 SV=3 -<br>[SRPK2_HUMAN<br>]<br>Kinesin-like<br>protein KIF3C<br>OS=Homo<br>sapiens<br>GN=KIF3C<br>PE=1 SV=3 -<br>[KIF3C_HUMAN<br>]<br>Putative<br>hydrolase<br>RBBP9<br>OS=Homo<br>sapiens<br>GN=RBBP9<br>PE=1 SV=2 -<br>[RBBP9_HUMAN<br>]                                                                                                                                                                                                                                                                                                                   | 4.61  | 1 | 1 | 1 | 3  | 1.211 | 0.510 | 0.999 | 0.682 | 4.79  | 4.61  | 1  | 3  | 152  | 17.7  | 8.34 |
| O75352 | ARL14 effector<br>protein-like<br>OS=Homo<br>sapiens<br>GN=ARL14EPL<br>PE=4 SV=1 -<br>[A14EL_HUMAN<br>]<br>Mannose-P-<br>dolichol<br>utilization<br>defect 1<br>protein<br>OS=Homo<br>sapiens<br>GN=MPDU1<br>PE=1 SV=2 -<br>[MPU1_HUMAN]<br>Zinc finger B-<br>box domain-<br>containing<br>protein 1<br>OS=Homo<br>sapiens<br>GN=ZBBX<br>PE=2 SV=3 -<br>[ZBBX_HUMAN]<br>SRSF protein<br>kinase 2<br>OS=Homo<br>sapiens<br>GN=SRPK2<br>PE=1 SV=3 -<br>[SRPK2_HUMAN<br>]<br>Kinesin-like<br>protein KIF3C<br>OS=Homo<br>sapiens<br>GN=KIF3C<br>PE=1 SV=3 -<br>[KIF3C_HUMAN<br>]<br>Putative<br>hydrolase<br>RBBP9<br>OS=Homo<br>sapiens<br>GN=RBBP9<br>PE=1 SV=2 -<br>[RBBP9_HUMAN<br>]                                                                                                                                                                                                                                                                                                                   | 4.05  | 1 | 1 | 1 | 2  | 1.063 | 0.308 | 0.291 | 0.682 | 2.55  | 4.05  | 2  | 2  | 247  | 26.6  | 8.94 |
| A8MT70 | ARL14 effector<br>protein-like<br>OS=Homo<br>sapiens<br>GN=ARL14EPL<br>PE=4 SV=1 -<br>[A14EL_HUMAN<br>]<br>Mannose-P-<br>dolichol<br>utilization<br>defect 1<br>protein<br>OS=Homo<br>sapiens<br>GN=MPDU1<br>PE=1 SV=2 -<br>[MPU1_HUMAN]<br>Zinc finger B-<br>box domain-<br>containing<br>protein 1<br>OS=Homo<br>sapiens<br>GN=ZBBX<br>PE=2 SV=3 -<br>[ZBBX_HUMAN]<br>SRSF protein<br>kinase 2<br>OS=Homo<br>sapiens<br>GN=SRPK2<br>PE=1 SV=3 -<br>[SRPK2_HUMAN<br>]<br>Kinesin-like<br>protein KIF3C<br>OS=Homo<br>sapiens<br>GN=KIF3C<br>PE=1 SV=3 -<br>[KIF3C_HUMAN<br>]<br>Putative<br>hydrolase<br>RBBP9<br>OS=Homo<br>sapiens<br>GN=RBBP9<br>PE=1 SV=2 -<br>[RBBP9_HUMAN<br>]                                                                                                                                                                                                                                                                                                                   | 3.38  | 1 | 2 | 2 | 2  | 0.515 | 0.711 | 0.810 | 0.682 | 0.00  | 3.38  | 2  | 2  | 800  | 91.4  | 5.59 |
| P78362 | ARL14 effector<br>protein-like<br>OS=Homo<br>sapiens<br>GN=ARL14EPL<br>PE=4 SV=1 -<br>[A14EL_HUMAN<br>]<br>Mannose-P-<br>dolichol<br>utilization<br>defect 1<br>protein<br>OS=Homo<br>sapiens<br>GN=MPDU1<br>PE=1 SV=2 -<br>[MPU1_HUMAN]<br>Zinc finger B-<br>box domain-<br>containing<br>protein 1<br>OS=Homo<br>sapiens<br>GN=ZBBX<br>PE=2 SV=3 -<br>[ZBBX_HUMAN]<br>SRSF protein<br>kinase 2<br>OS=Homo<br>sapiens<br>GN=SRPK2<br>PE=1 SV=3 -<br>[SRPK2_HUMAN<br>]<br>Kinesin-like<br>protein KIF3C<br>OS=Homo<br>sapiens<br>GN=KIF3C<br>PE=1 SV=3 -<br>[KIF3C_HUMAN<br>]<br>Putative<br>hydrolase<br>RBBP9<br>OS=Homo<br>sapiens<br>GN=RBBP9<br>PE=1 SV=2 -<br>[RBBP9_HUMAN<br>]                                                                                                                                                                                                                                                                                                                   | 7.70  | 1 | 6 | 7 | 18 | 0.688 | 0.908 | 1.085 | 0.683 | 40.23 | 7.70  | 11 | 18 | 688  | 77.5  | 4.97 |
| O14782 | ARL14 effector<br>protein-like<br>OS=Homo<br>sapiens<br>GN=ARL14EPL<br>PE=4 SV=1 -<br>[A14EL_HUMAN<br>]<br>Mannose-P-<br>dolichol<br>utilization<br>defect 1<br>protein<br>OS=Homo<br>sapiens<br>GN=MPDU1<br>PE=1 SV=2 -<br>[MPU1_HUMAN]<br>Zinc finger B-<br>box domain-<br>containing<br>protein 1<br>OS=Homo<br>sapiens<br>GN=ZBBX<br>PE=2 SV=3 -<br>[ZBBX_HUMAN]<br>SRSF protein<br>kinase 2<br>OS=Homo<br>sapiens<br>GN=SRPK2<br>PE=1 SV=3 -<br>[SRPK2_HUMAN<br>]<br>Kinesin-like<br>protein KIF3C<br>OS=Homo<br>sapiens<br>GN=KIF3C<br>PE=1 SV=3 -<br>[KIF3C_HUMAN<br>]<br>Putative<br>hydrolase<br>RBBP9<br>OS=Homo<br>sapiens<br>GN=RBBP9<br>PE=1 SV=2 -<br>[RBBP9_HUMAN<br>]                                                                                                                                                                                                                                                                                                                   | 7.44  | 2 | 2 | 4 | 6  | 0.950 | 1.286 | 0.971 | 0.683 | 14.00 | 7.44  | 5  | 6  | 793  | 89.4  | 8.22 |
| O75884 | ARL14 effector<br>protein-like<br>OS=Homo<br>sapiens<br>GN=ARL14EPL<br>PE=4 SV=1 -<br>[A14EL_HUMAN<br>]<br>Mannose-P-<br>dolichol<br>utilization<br>defect 1<br>protein<br>OS=Homo<br>sapiens<br>GN=MPDU1<br>PE=1 SV=2 -<br>[MPU1_HUMAN]<br>Zinc finger B-<br>box domain-<br>containing<br>protein 1<br>OS=Homo<br>sapiens<br>GN=ZBBX<br>PE=2 SV=3 -<br>[ZBBX_HUMAN]<br>SRSF protein<br>kinase 2<br>OS=Homo<br>sapiens<br>GN=SRPK2<br>PE=1 SV=3 -<br>[SRPK2_HUMAN<br>]<br>Kinesin-like<br>protein KIF3C<br>OS=Homo<br>sapiens<br>GN=KIF3C<br>PE=1 SV=3 -<br>[KIF3C_HUMAN<br>]<br>Putative<br>hydrolase<br>RBBP9<br>OS=Homo<br>sapiens<br>GN=RBBP9<br>PE=1 SV=2 -<br>[RBBP9_HUMAN<br>]                                                                                                                                                                                                                                                                                                                   | 25.27 | 1 | 3 | 3 | 8  | 1.615 | 0.783 | 0.763 | 0.683 | 20.27 | 25.27 | 5  | 8  | 186  | 21.0  | 6.20 |



|        |                                                                                                                              |       |   |    |    |     |       |       |       |       |        |       |    |     |      |       |      |
|--------|------------------------------------------------------------------------------------------------------------------------------|-------|---|----|----|-----|-------|-------|-------|-------|--------|-------|----|-----|------|-------|------|
| P58546 | Myotrophin<br>OS=Homo sapiens<br>GN=MTPN<br>PE=1 SV=2 - [MTPN_HUMAN]                                                         | 46.61 | 1 | 7  | 7  | 54  | 0.963 | 0.932 | 0.992 | 0.684 | 128.69 | 46.61 | 10 | 54  | 118  | 12.9  | 5.52 |
| Q9ULV0 | Unconventional myosin-Vb<br>OS=Homo sapiens<br>GN=MYO5B<br>PE=1 SV=3 - [MYO5B_HUMAN]                                         | 2.11  | 2 | 1  | 4  | 5   | 0.948 | 2.711 | 0.948 | 0.684 | 9.58   | 2.11  | 5  | 5   | 1848 | 213.5 | 7.20 |
| P18084 | Integrin beta-5<br>OS=Homo sapiens<br>GN=ITGB5<br>PE=1 SV=1 - [ITB5_HUMAN]                                                   | 18.90 | 1 | 13 | 13 | 36  | 1.468 | 1.010 | 0.778 | 0.684 | 71.37  | 18.90 | 19 | 36  | 799  | 88.0  | 6.06 |
| Q86YS7 | C2 domain-containing protein 5<br>OS=Homo sapiens<br>GN=C2CD5<br>PE=1 SV=1 - [C2CD5_HUMAN]                                   | 1.90  | 1 | 2  | 2  | 2   |       | 2.369 |       | 0.684 | 5.51   | 1.90  | 2  | 2   | 1000 | 110.4 | 5.69 |
| P04259 | Keratin, type II cytoskeletal 6B<br>OS=Homo sapiens<br>GN=KRT6B<br>PE=1 SV=5 - [K2C6B_HUMAN]                                 | 14.72 | 4 | 1  | 10 | 104 | 1.289 | 0.596 | 0.407 | 0.685 | 213.62 | 14.72 | 14 | 104 | 564  | 60.0  | 8.00 |
| Q9H7M9 | Platelet receptor G24<br>OS=Homo sapiens<br>GN=C10orf54<br>PE=1 SV=3 - [GI24_HUMAN]                                          | 9.00  | 1 | 3  | 3  | 5   | 0.818 | 0.491 | 0.679 | 0.685 | 6.92   | 9.00  | 5  | 5   | 311  | 33.9  | 6.95 |
| Q9C099 | Leucine-rich repeat and coiled-coil domain-containing protein 1<br>OS=Homo sapiens<br>GN=LRRCC1<br>PE=1 SV=2 - [LRCC1_HUMAN] | 7.46  | 1 | 5  | 6  | 6   | 1.524 | 0.861 | 1.126 | 0.685 | 3.79   | 7.46  | 6  | 6   | 1032 | 119.5 | 5.88 |
| Q9Y281 | Cofilin-2<br>OS=Homo sapiens<br>GN=CFI2 PE=1 SV=1 - [COF2_HUMAN]                                                             | 78.31 | 1 | 9  | 14 | 246 | 0.909 | 0.966 | 0.913 | 0.685 | 548.92 | 78.31 | 23 | 246 | 166  | 18.7  | 7.88 |
| Q7Z449 | Cytochrome P450 2U1<br>OS=Homo sapiens<br>GN=CYP2U1<br>PE=1 SV=1 - [CP2U1_HUMAN]                                             | 4.96  | 1 | 2  | 3  | 5   | 0.651 | 0.845 | 1.229 | 0.685 | 17.21  | 4.96  | 3  | 5   | 544  | 61.9  | 8.40 |

|        |                                                                                                                  |       |   |   |    |     |       |       |       |       |        |       |    |     |      |       |      |
|--------|------------------------------------------------------------------------------------------------------------------|-------|---|---|----|-----|-------|-------|-------|-------|--------|-------|----|-----|------|-------|------|
| P13196 | 5-aminolevulinat synthase, nonspecific, mitochondrial<br>OS=Homo sapiens<br>GN=ALAS1<br>PE=1 SV=2 - [HEM1_HUMAN] | 2.03  | 1 | 1 | 1  | 1   | 1.472 | 0.596 | 1.493 | 0.686 | 3.38   | 2.03  | 1  | 1   | 640  | 70.5  | 8.46 |
| P62070 | Ras-related protein R-Ras2<br>OS=Homo sapiens<br>GN=RRAS2<br>PE=1 SV=1 - [RRAS2_HUMAN]                           | 58.82 | 1 | 9 | 11 | 63  | 0.851 | 0.701 | 0.743 | 0.686 | 165.09 | 58.82 | 17 | 63  | 204  | 23.4  | 6.01 |
| Q02153 | Guanylate cyclase soluble subunit beta-1<br>OS=Homo sapiens<br>GN=GUCY1B3<br>PE=1 SV=1 - [GUCY1_HUMAN]           | 9.21  | 1 | 5 | 5  | 8   | 0.685 | 0.903 | 1.004 | 0.686 | 16.39  | 9.21  | 7  | 8   | 619  | 70.5  | 5.35 |
| Q9UBI1 | COMM domain-containing protein 3<br>OS=Homo sapiens<br>GN=COMMD3<br>PE=1 SV=1 - [COMMD3_HUMAN]                   | 9.74  | 1 | 2 | 2  | 2   | 1.015 | 1.150 | 1.219 | 0.686 | 7.38   | 9.74  | 2  | 2   | 195  | 22.1  | 5.99 |
| Q9NVA2 | Septin-11<br>OS=Homo sapiens<br>GN=SEPT11<br>PE=1 SV=3 - [SEP11_HUMAN]                                           | 49.65 | 1 | 9 | 22 | 103 | 0.749 | 0.894 | 0.807 | 0.686 | 245.15 | 49.65 | 34 | 103 | 429  | 49.4  | 6.81 |
| A8MX4  | Zinc finger protein 99<br>OS=Homo sapiens<br>GN=ZNF99<br>PE=2 SV=3 - [ZNF99_HUMAN]                               | 5.44  | 1 | 2 | 3  | 5   | 0.901 | 0.385 | 0.660 | 0.686 | 8.27   | 5.44  | 4  | 5   | 864  | 100.7 | 9.45 |
| Q7Z2Z1 | Treslin<br>OS=Homo sapiens<br>GN=TICRR<br>PE=1 SV=2 - [TICRR_HUMAN]                                              | 1.88  | 1 | 3 | 3  | 3   | 0.729 | 0.919 | 0.959 | 0.686 | 1.62   | 1.88  | 3  | 3   | 1910 | 210.7 | 8.78 |
| Q8TAL6 | Fin bud initiation factor homolog<br>OS=Homo sapiens<br>GN=FIBIN<br>PE=1 SV=1 - [FIBIN_HUMAN]                    | 11.85 | 1 | 2 | 2  | 2   | 1.541 | 0.738 | 1.068 | 0.686 | 3.08   | 11.85 | 2  | 2   | 211  | 24.3  | 5.49 |
| P42574 | Caspase-3<br>OS=Homo sapiens<br>GN=CASP3<br>PE=1 SV=2 - [CASP3_HUMAN]                                            | 34.30 | 1 | 8 | 8  | 28  | 0.718 | 0.804 | 0.728 | 0.686 | 78.98  | 34.30 | 13 | 28  | 277  | 31.6  | 6.54 |

|        |                                                                                                                      |       |    |    |    |     |       |       |       |       |        |       |    |     |      |       |      |
|--------|----------------------------------------------------------------------------------------------------------------------|-------|----|----|----|-----|-------|-------|-------|-------|--------|-------|----|-----|------|-------|------|
| Q6AW86 | Zinc finger protein 324B<br>OS=Homo sapiens<br>GN=ZNF324B<br>PE=2 SV=1 - [Z324B_HUMAN]                               | 1.29  | 2  | 1  | 1  | 2   | 0.810 | 1.043 | 0.655 | 0.686 | 4.08   | 1.29  | 1  | 2   | 544  | 60.6  | 9.69 |
| O95394 | Phosphoacetylglucosamine mutase<br>OS=Homo sapiens<br>GN=PGM3<br>PE=1 SV=1 - [AGM1_HUMAN]                            | 48.71 | 1  | 20 | 20 | 89  | 0.632 | 0.731 | 0.842 | 0.687 | 229.41 | 48.71 | 31 | 89  | 542  | 59.8  | 6.25 |
| Q15121 | Astrocytic phosphoprotein PEA-15<br>OS=Homo sapiens<br>GN=PEA15<br>PE=1 SV=2 - [PEA15_HUMAN]                         | 70.00 | 1  | 12 | 12 | 71  | 0.585 | 0.718 | 0.911 | 0.687 | 163.70 | 70.00 | 18 | 71  | 130  | 15.0  | 5.02 |
| Q9H8W4 | Pleckstrin homology domain-containing family F member 2<br>OS=Homo sapiens<br>GN=PLEKH2<br>PE=1 SV=1 - [PKHF2_HUMAN] | 4.02  | 2  | 1  | 1  | 3   | 1.752 | 1.846 | 1.343 | 0.687 | 2.02   | 4.02  | 2  | 3   | 249  | 27.8  | 8.21 |
| Q13287 | N-myc-interactor<br>OS=Homo sapiens<br>GN=NMI PE=1 SV=2 - [NMI_HUMAN]                                                | 18.57 | 1  | 5  | 5  | 16  | 0.820 | 1.112 | 0.757 | 0.688 | 31.06  | 18.57 | 9  | 16  | 307  | 35.0  | 5.34 |
| O75473 | Leucine-rich repeat-containing G-protein coupled receptor 5<br>OS=Homo sapiens<br>GN=LGR5 PE=1 SV=1 - [LGR5_HUMAN]   | 3.64  | 3  | 2  | 4  | 10  | 0.940 | 1.424 | 2.062 | 0.688 | 17.57  | 3.64  | 4  | 10  | 907  | 99.9  | 6.60 |
| P41252 | Isoleucine--tRNA ligase, cytoplasmic<br>OS=Homo sapiens<br>GN=IARS PE=1 SV=2 - [SYIC_HUMAN]                          | 31.70 | 1  | 43 | 43 | 163 | 0.680 | 0.774 | 0.815 | 0.688 | 388.33 | 31.70 | 68 | 163 | 1262 | 144.4 | 6.15 |
| Q3SXZ3 | Zinc finger protein 718<br>OS=Homo sapiens<br>GN=ZNF718<br>PE=2 SV=1 - [ZNF718_HUMAN]                                | 6.28  | 94 | 1  | 2  | 4   | 1.154 | 2.098 | 2.451 | 0.688 | 0.00   | 6.28  | 2  | 4   | 478  | 55.4  | 9.45 |

|        |                                                                                                                      |       |   |    |    |    |       |       |       |       |        |       |    |    |      |       |      |
|--------|----------------------------------------------------------------------------------------------------------------------|-------|---|----|----|----|-------|-------|-------|-------|--------|-------|----|----|------|-------|------|
| Q9UKI2 | Cdc42 effector protein 3<br>OS=Homo sapiens<br>GN=CDC42EP3<br>PE=1 SV=1 - [BORG2_HUMAN]                              | 18.90 | 1 | 4  | 4  | 11 | 0.756 | 0.930 | 1.304 | 0.688 | 44.28  | 18.90 | 5  | 11 | 254  | 27.7  | 5.78 |
| P36897 | TGF-beta receptor type-1<br>OS=Homo sapiens<br>GN=TGFBRI<br>PE=1 SV=1 - [TGFR1_HUMAN]                                | 4.97  | 1 | 3  | 3  | 4  | 1.628 | 0.828 | 0.499 | 0.688 | 5.94   | 4.97  | 4  | 4  | 503  | 55.9  | 7.55 |
| Q8IZU1 | Protein FAM9A<br>OS=Homo sapiens<br>GN=FAM9A<br>PE=1 SV=1 - [FAM9A_HUMAN]                                            | 3.92  | 1 | 1  | 1  | 1  | 0.670 | 0.693 | 0.835 | 0.688 | 2.32   | 3.92  | 1  | 1  | 332  | 37.3  | 4.83 |
| Q8TEU7 | Rap guanine nucleotide exchange factor 6<br>OS=Homo sapiens<br>GN=RAPGEF6<br>PE=1 SV=2 - [RPGF6_HUMAN]               | 1.37  | 1 | 2  | 3  | 10 | 0.777 | 0.772 | 0.684 | 0.689 | 17.08  | 1.37  | 4  | 10 | 1601 | 179.3 | 6.40 |
| Q96JC1 | Vam6/Vps39-like protein<br>OS=Homo sapiens<br>GN=VPS39<br>PE=1 SV=2 - [VPS39_HUMAN]                                  | 4.18  | 1 | 4  | 4  | 5  | 1.170 | 1.090 | 0.876 | 0.689 | 9.60   | 4.18  | 5  | 5  | 886  | 101.7 | 6.99 |
| Q8WW59 | SPRY domain-containing protein 4<br>OS=Homo sapiens<br>GN=SPRYD4<br>PE=1 SV=2 - [SPRY4_HUMAN]                        | 16.91 | 1 | 2  | 2  | 5  | 0.675 | 0.659 | 0.777 | 0.689 | 15.49  | 16.91 | 2  | 5  | 207  | 23.1  | 6.93 |
| Q5VT25 | Serine/threonine-protein kinase MRCK alpha<br>OS=Homo sapiens<br>GN=CDC42BPA<br>PE=1 SV=1 - [MRCKA_HUMAN]            | 15.01 | 1 | 19 | 25 | 51 | 0.990 | 0.787 | 1.015 | 0.689 | 133.93 | 15.01 | 35 | 51 | 1732 | 197.2 | 6.58 |
| O95980 | Reversion-inducing cysteine-rich protein with Kazal motifs<br>OS=Homo sapiens<br>GN=RECK<br>PE=1 SV=1 - [RECK_HUMAN] | 12.46 | 1 | 13 | 13 | 32 | 0.685 | 0.437 | 0.707 | 0.689 | 73.50  | 12.46 | 18 | 32 | 971  | 106.4 | 6.74 |
| Q53EP0 | Fibronectin type III domain-containing protein 3B<br>OS=Homo sapiens<br>GN=FNDC3B<br>PE=1 SV=2 - [FND3B_HUMAN]       | 22.01 | 1 | 21 | 21 | 62 | 0.811 | 0.539 | 0.758 | 0.690 | 158.36 | 22.01 | 32 | 62 | 1204 | 132.8 | 5.95 |

|        |                                                                                                                |       |   |    |    |     |       |       |       |       |        |       |    |     |      |       |       |
|--------|----------------------------------------------------------------------------------------------------------------|-------|---|----|----|-----|-------|-------|-------|-------|--------|-------|----|-----|------|-------|-------|
| Q9UJ72 | Annexin A10<br>OS=Homo sapiens<br>GN=ANXA10<br>PE=1 SV=3 - [ANX10_HUMAN]                                       | 5.56  | 1 | 2  | 2  | 3   | 0.796 | 1.680 | 1.300 | 0.690 | 8.07   | 5.56  | 2  | 3   | 324  | 37.3  | 5.33  |
| P09104 | Gamma-enolase<br>OS=Homo sapiens<br>GN=ENO2<br>PE=1 SV=3 - [ENOG_HUMAN]                                        | 51.15 | 1 | 12 | 17 | 196 | 1.796 | 2.467 | 1.413 | 0.690 | 507.54 | 51.15 | 25 | 196 | 434  | 47.2  | 5.03  |
| P06756 | Integrin alpha-V<br>OS=Homo sapiens<br>GN=ITGAV<br>PE=1 SV=2 - [ITAV_HUMAN]                                    | 33.40 | 1 | 32 | 32 | 208 | 1.210 | 0.921 | 0.683 | 0.690 | 507.27 | 33.40 | 58 | 208 | 1048 | 116.0 | 5.68  |
| Q96J92 | Serine/threonine-protein kinase WNK4<br>OS=Homo sapiens<br>GN=WNK4<br>PE=1 SV=1 - [WNK4_HUMAN]                 | 4.59  | 1 | 2  | 6  | 24  | 0.192 | 1.264 | 1.572 | 0.690 | 45.97  | 4.59  | 10 | 24  | 1243 | 134.7 | 5.48  |
| P62273 | 40S ribosomal protein S29<br>OS=Homo sapiens<br>GN=RPS29<br>PE=1 SV=2 - [RS29_HUMAN]                           | 23.21 | 1 | 2  | 2  | 2   | 0.947 | 0.621 | 0.895 | 0.690 | 2.03   | 23.21 | 2  | 2   | 56   | 6.7   | 10.13 |
| Q16825 | Tyrosine-protein phosphatase non-receptor type 21<br>OS=Homo sapiens<br>GN=PTPN21<br>PE=1 SV=2 - [PTN21_HUMAN] | 0.68  | 1 | 1  | 1  | 2   | 0.613 | 2.696 | 1.283 | 0.691 | 1.75   | 0.68  | 2  | 2   | 1174 | 133.2 | 7.90  |
| Q13572 | Inositol-tetrakisphosphate 1-kinase<br>OS=Homo sapiens<br>GN=ITPK1<br>PE=1 SV=2 - [ITPK1_HUMAN]                | 3.14  | 1 | 1  | 1  | 2   | 0.879 | 1.001 | 1.492 | 0.691 | 4.75   | 3.14  | 2  | 2   | 414  | 45.6  | 6.16  |
| O43310 | CBP80/20-dependent translation initiation factor<br>OS=Homo sapiens<br>GN=CTIF PE=1 SV=1 - [CTIF_HUMAN]        | 15.22 | 1 | 7  | 7  | 13  | 0.670 | 1.316 | 0.944 | 0.691 | 33.54  | 15.22 | 8  | 13  | 598  | 67.5  | 6.54  |
| Q9NW08 | DNA-directed RNA polymerase III subunit RPC2<br>OS=Homo sapiens<br>GN=POLR3B<br>PE=1 SV=2 - [RPC2_HUMAN]       | 3.09  | 1 | 3  | 3  | 4   | 0.469 | 0.725 | 1.018 | 0.691 | 11.96  | 3.09  | 4  | 4   | 1133 | 127.7 | 8.50  |

|        |                                                                                                                                    |       |   |    |    |     |       |       |       |       |        |       |    |     |      |       |       |
|--------|------------------------------------------------------------------------------------------------------------------------------------|-------|---|----|----|-----|-------|-------|-------|-------|--------|-------|----|-----|------|-------|-------|
| O43776 | Asparagine--<br>tRNA ligase,<br>cytoplasmic<br>OS=Homo<br>sapiens<br>GN=NARS<br>PE=1 SV=1 -<br>[SYNC_HUMAN]                        | 41.61 | 1 | 25 | 25 | 170 | 0.677 | 0.762 | 0.842 | 0.691 | 464.23 | 41.61 | 43 | 170 | 548  | 62.9  | 6.25  |
| O95365 | Zinc finger and<br>BTB domain-<br>containing<br>protein 7A<br>OS=Homo<br>sapiens<br>GN=ZBTB7A<br>PE=1 SV=1 -<br>[ZBT7A_HUMAN<br>]  | 8.90  | 1 | 2  | 2  | 2   | 0.848 | 0.697 | 1.376 | 0.691 | 3.00   | 8.90  | 2  | 2   | 584  | 61.4  | 5.19  |
| P61224 | Ras-related<br>protein Rap-1b<br>OS=Homo<br>sapiens<br>GN=RAP1B<br>PE=1 SV=1 -<br>[RAP1B_HUMAN<br>]                                | 76.09 | 2 | 4  | 12 | 184 | 1.104 | 1.170 | 1.107 | 0.691 | 487.96 | 76.09 | 19 | 184 | 184  | 20.8  | 5.78  |
| P21554 | Cannabinoid<br>receptor 1<br>OS=Homo<br>sapiens<br>GN=CNR1<br>PE=1 SV=1 -<br>[CNR1_HUMAN]                                          | 2.54  | 1 | 1  | 1  | 1   | 0.473 | 0.788 | 0.799 | 0.691 | 0.00   | 2.54  | 1  | 1   | 472  | 52.8  | 8.16  |
| P62861 | 40S ribosomal<br>protein S30<br>OS=Homo<br>sapiens<br>GN=FAU PE=1<br>SV=1 -<br>[RS30_HUMAN]                                        | 18.64 | 1 | 2  | 2  | 10  | 0.848 | 1.034 | 0.723 | 0.691 | 21.98  | 18.64 | 4  | 10  | 59   | 6.6   | 12.15 |
| Q16445 | Gamma-<br>aminobutyric<br>acid receptor<br>subunit alpha-<br>6 OS=Homo<br>sapiens<br>GN=GABRA6<br>PE=1 SV=2 -<br>[GBRA6_HUMAN<br>] | 3.75  | 1 | 1  | 1  | 1   | 1.051 | 1.137 | 0.924 | 0.692 | 0.00   | 3.75  | 1  | 1   | 453  | 51.0  | 8.22  |
| Q9Y4E6 | WD repeat-<br>containing<br>protein 7<br>OS=Homo<br>sapiens<br>GN=WDR7<br>PE=1 SV=2 -<br>[WDR7_HUMAN<br>]                          | 2.55  | 1 | 2  | 2  | 2   | 1.669 | 1.988 | 1.223 | 0.692 | 2.27   | 2.55  | 2  | 2   | 1490 | 163.7 | 6.92  |
| Q15048 | Leucine-rich<br>repeat-<br>containing<br>protein 14<br>OS=Homo<br>sapiens<br>GN=LRRRC14<br>PE=2 SV=1 -<br>[LRC14_HUMAN<br>]        | 1.83  | 1 | 1  | 1  | 2   | 1.034 | 0.510 | 0.440 | 0.692 | 4.85   | 1.83  | 1  | 2   | 493  | 54.5  | 6.90  |
| O14908 | PDZ domain-<br>containing<br>protein GIPC1<br>OS=Homo<br>sapiens<br>GN=GIPC1<br>PE=1 SV=2 -<br>[GIPC1_HUMAN<br>]                   | 45.05 | 2 | 12 | 14 | 50  | 0.699 | 0.876 | 0.924 | 0.692 | 131.68 | 45.05 | 21 | 50  | 333  | 36.0  | 6.28  |

|        |                                                                                                             |       |   |   |   |    |       |       |       |       |       |       |    |    |      |       |      |
|--------|-------------------------------------------------------------------------------------------------------------|-------|---|---|---|----|-------|-------|-------|-------|-------|-------|----|----|------|-------|------|
| P20848 | Putative alpha-1-antitrypsin-related protein<br>OS=Homo sapiens<br>GN=SERPINA2<br>PE=1 SV=1 - [A1ATR_HUMAN] | 5.24  | 1 | 2 | 2 | 2  | 0.758 | 0.551 | 1.358 | 0.692 | 1.99  | 5.24  | 2  | 2  | 420  | 47.9  | 7.90 |
| Q8N687 | Beta-defensin 125 OS=Homo sapiens<br>GN=DEFB125<br>PE=2 SV=2 - [DB125_HUMAN]                                | 6.41  | 1 | 1 | 1 | 1  | 1.737 | 1.226 | 1.201 | 0.693 | 2.02  | 6.41  | 1  | 1  | 156  | 17.5  | 5.49 |
| P58215 | Lysyl oxidase homolog 3 OS=Homo sapiens<br>GN=LOXL3<br>PE=2 SV=1 - [LOXL3_HUMAN]                            | 1.73  | 1 | 1 | 1 | 4  | 0.546 | 0.598 | 0.534 | 0.693 | 13.74 | 1.73  | 2  | 4  | 753  | 83.1  | 6.86 |
| Q9NQE9 | Histidine triad nucleotide-binding protein 3 OS=Homo sapiens<br>GN=HINT3<br>PE=1 SV=1 - [HINT3_HUMAN]       | 13.74 | 1 | 2 | 2 | 6  | 1.079 | 1.067 | 1.026 | 0.693 | 7.33  | 13.74 | 3  | 6  | 182  | 20.3  | 6.60 |
| P51580 | Thiopurine S-methyltransferase OS=Homo sapiens<br>GN=TPMT<br>PE=1 SV=1 - [TPMT_HUMAN]                       | 26.12 | 1 | 9 | 9 | 28 | 0.810 | 1.330 | 1.227 | 0.693 | 49.33 | 26.12 | 14 | 28 | 245  | 28.2  | 6.23 |
| Q86WA8 | Lon protease homolog 2, peroxisomal OS=Homo sapiens<br>GN=LONP2<br>PE=1 SV=1 - [LONP2_HUMAN]                | 4.34  | 1 | 3 | 3 | 4  | 0.266 | 0.901 | 1.088 | 0.693 | 5.36  | 4.34  | 4  | 4  | 852  | 94.6  | 7.30 |
| Q9Y2E5 | Epididymis-specific alpha-mannosidase OS=Homo sapiens<br>GN=MAN2B2<br>PE=1 SV=4 - [MA2B2_HUMAN]             | 8.72  | 1 | 6 | 6 | 17 | 0.894 | 1.056 | 1.494 | 0.693 | 50.66 | 8.72  | 8  | 17 | 1009 | 113.9 | 7.24 |
| Q96C00 | Zinc finger and BTB domain-containing protein 9 OS=Homo sapiens<br>GN=ZBTB9<br>PE=1 SV=1 - [ZBTB9_HUMAN]    | 2.96  | 1 | 1 | 1 | 1  | 0.834 | 1.728 | 1.741 | 0.693 | 3.28  | 2.96  | 1  | 1  | 473  | 50.6  | 6.76 |
| Q2M1P5 | Kinesin-like protein KIF7 OS=Homo sapiens<br>GN=KIF7 PE=1 SV=2 - [KIF7_HUMAN]                               | 3.50  | 1 | 3 | 6 | 13 | 1.105 | 0.722 | 0.830 | 0.694 | 27.82 | 3.50  | 6  | 13 | 1343 | 150.5 | 6.79 |

|        |                                                                                                                |       |   |   |    |    |       |       |       |       |        |       |    |    |      |       |      |
|--------|----------------------------------------------------------------------------------------------------------------|-------|---|---|----|----|-------|-------|-------|-------|--------|-------|----|----|------|-------|------|
| P61086 | Ubiquitin-conjugating enzyme E2 K<br>OS=Homo sapiens<br>GN=UBE2K<br>PE=1 SV=3 - [UBE2K_HUMAN]                  | 52.50 | 1 | 9 | 10 | 55 | 0.805 | 0.830 | 0.792 | 0.694 | 141.11 | 52.50 | 15 | 55 | 200  | 22.4  | 5.44 |
| P10398 | Serine/threonine-protein kinase A-Raf<br>OS=Homo sapiens<br>GN=ARAF<br>PE=1 SV=2 - [ARAF_HUMAN]                | 10.40 | 1 | 4 | 5  | 12 | 0.875 | 0.623 | 0.846 | 0.694 | 28.22  | 10.40 | 7  | 12 | 606  | 67.5  | 9.01 |
| Q8NEZ4 | Histone-lysine N-methyltransferase 2C<br>OS=Homo sapiens<br>GN=KMT2C<br>PE=1 SV=3 - [KMT2C_HUMAN]              | 0.33  | 1 | 2 | 2  | 6  | 0.644 | 0.906 | 0.921 | 0.694 | 12.80  | 0.33  | 2  | 6  | 4911 | 541.0 | 6.49 |
| Q8N9B5 | Junction-mediating and regulatory protein<br>OS=Homo sapiens<br>GN=JMY PE=1 SV=2 - [JMY_HUMAN]                 | 1.42  | 1 | 1 | 2  | 3  | 0.988 | 1.026 | 1.027 | 0.694 | 2.41   | 1.42  | 3  | 3  | 988  | 111.4 | 6.18 |
| H7BZ55 | Putative ciliary rootlet coiled-coil protein-like 3 protein<br>OS=Homo sapiens PE=5 SV=2 - [CROL3_HUMAN]       | 6.13  | 3 | 6 | 11 | 17 | 1.235 | 0.708 | 0.737 | 0.695 | 21.91  | 6.13  | 12 | 17 | 2252 | 248.2 | 5.83 |
| Q9Y5J5 | Pleckstrin homology-like domain family A member 3<br>OS=Homo sapiens<br>GN=PHLDA3<br>PE=1 SV=1 - [PHLA3_HUMAN] | 6.30  | 1 | 1 | 1  | 1  | 1.350 | 1.161 | 1.088 | 0.695 | 2.38   | 6.30  | 1  | 1  | 127  | 13.9  | 9.67 |
| Q8NE86 | Calcium uniporter protein, mitochondrial<br>OS=Homo sapiens<br>GN=MCU PE=1 SV=1 - [MCU_HUMAN]                  | 24.79 | 1 | 8 | 8  | 20 | 0.710 | 0.727 | 0.957 | 0.695 | 41.60  | 24.79 | 14 | 20 | 351  | 39.8  | 8.65 |
| Q9Y296 | Trafficking protein particle complex subunit 4<br>OS=Homo sapiens<br>GN=TRAPPC4<br>PE=1 SV=1 - [TPPC4_HUMAN]   | 10.05 | 1 | 2 | 2  | 2  | 0.808 | 1.301 | 2.058 | 0.695 | 6.67   | 10.05 | 2  | 2  | 219  | 24.3  | 6.21 |



|        |                                                                                                                                  |       |   |    |    |     |       |       |       |       |        |       |    |     |      |       |      |
|--------|----------------------------------------------------------------------------------------------------------------------------------|-------|---|----|----|-----|-------|-------|-------|-------|--------|-------|----|-----|------|-------|------|
| Q9Y5Z7 | Host cell factor<br>2 OS=Homo<br>sapiens<br>GN=HCFC2<br>PE=1 SV=1 -<br>[HCFC2_HUMAN<br>]                                         | 2.53  | 1 | 1  | 1  | 1   | 0.797 | 0.236 | 0.252 | 0.696 | 0.00   | 2.53  | 1  | 1   | 792  | 86.7  | 8.48 |
| Q12884 | Prolyl<br>endopeptidase<br>FAP OS=Homo<br>sapiens<br>GN=FAP PE=1<br>SV=5 -<br>[SEPR_HUMAN]                                       | 22.76 | 1 | 18 | 19 | 107 | 0.507 | 2.050 | 1.395 | 0.696 | 216.80 | 22.76 | 33 | 107 | 760  | 87.7  | 6.65 |
| Q8NFZ5 | TNFAIP3-<br>interacting<br>protein 2<br>OS=Homo<br>sapiens<br>GN=TNIP2<br>PE=1 SV=1 -<br>[TNIP2_HUMAN<br>]                       | 6.76  | 1 | 1  | 2  | 5   | 0.451 | 1.042 | 0.978 | 0.696 | 17.57  | 6.76  | 3  | 5   | 429  | 48.7  | 6.44 |
| Q8WUA8 | Tsukushin<br>OS=Homo<br>sapiens<br>GN=TSKU<br>PE=2 SV=3 -<br>[TSK_HUMAN]                                                         | 4.25  | 1 | 1  | 1  | 1   | 0.800 | 0.869 | 0.606 | 0.696 | 0.00   | 4.25  | 1  | 1   | 353  | 37.8  | 6.87 |
| Q8NAC3 | Interleukin-17<br>receptor C<br>OS=Homo<br>sapiens<br>GN=IL17RC<br>PE=1 SV=2 -<br>[IL17RC_HUMAN<br>]                             | 1.52  | 1 | 1  | 1  | 1   | 1.325 | 0.189 | 0.345 | 0.697 | 2.27   | 1.52  | 1  | 1   | 791  | 86.2  | 6.10 |
| Q8N9N2 | Activating<br>signal<br>cointegrator 1<br>complex<br>subunit 1<br>OS=Homo<br>sapiens<br>GN=ASCC1<br>PE=1 SV=1 -<br>[ASCC1_HUMAN] | 13.50 | 1 | 5  | 5  | 12  | 0.923 | 0.701 | 0.617 | 0.697 | 27.74  | 13.50 | 7  | 12  | 400  | 45.5  | 5.54 |
| Q9BRQ0 | Pygopus<br>homolog 2<br>OS=Homo<br>sapiens<br>GN=PYGO2<br>PE=1 SV=2 -<br>[PYGO2_HUMAN]                                           | 1.97  | 1 | 1  | 1  | 1   | 1.080 | 1.194 | 0.878 | 0.697 | 1.84   | 1.97  | 1  | 1   | 406  | 41.2  | 7.28 |
| Q15012 | Lysosomal-<br>associated<br>transmembran<br>e protein 4A<br>OS=Homo<br>sapiens<br>GN=LAPTM4A<br>PE=1 SV=1 -<br>[LAP4A_HUMAN<br>] | 5.58  | 1 | 1  | 1  | 3   | 1.167 | 1.030 | 1.132 | 0.697 | 4.87   | 5.58  | 2  | 3   | 233  | 26.8  | 6.49 |
| Q9HBLD | Tensin-1<br>OS=Homo<br>sapiens<br>GN=TNS1<br>PE=1 SV=2 -<br>[TENS1_HUMAN<br>]                                                    | 36.02 | 1 | 44 | 47 | 217 | 0.467 | 1.480 | 1.419 | 0.697 | 560.37 | 36.02 | 78 | 217 | 1735 | 185.6 | 7.75 |

|        |                                                                                                                           |       |   |   |    |    |       |       |       |       |        |       |    |    |      |       |      |
|--------|---------------------------------------------------------------------------------------------------------------------------|-------|---|---|----|----|-------|-------|-------|-------|--------|-------|----|----|------|-------|------|
| Q5T0N5 | Formin-binding protein 1-like<br>OS=Homo sapiens<br>GN=FNBP1L<br>PE=1 SV=3 - [FNBP1L_HUMAN]                               | 10.25 | 1 | 5 | 6  | 14 | 0.661 | 1.178 | 1.146 | 0.697 | 32.01  | 10.25 | 10 | 14 | 605  | 70.0  | 6.64 |
| P10301 | Ras-related protein R-Ras<br>OS=Homo sapiens<br>GN=RRAS<br>PE=1 SV=1 - [RRAS_HUMAN]                                       | 56.88 | 1 | 8 | 10 | 64 | 1.051 | 1.284 | 1.215 | 0.697 | 169.93 | 56.88 | 16 | 64 | 218  | 23.5  | 6.93 |
| Q9HDC5 | Junctophilin-1<br>OS=Homo sapiens<br>GN=JPH1 PE=1 SV=2 - [JPH1_HUMAN]                                                     | 1.51  | 1 | 1 | 1  | 1  | 0.678 | 0.718 | 0.890 | 0.698 | 2.46   | 1.51  | 1  | 1  | 661  | 71.6  | 9.32 |
| Q9BRS8 | La-related protein 6<br>OS=Homo sapiens<br>GN=LARP6<br>PE=1 SV=1 - [LARP6_HUMAN]                                          | 11.61 | 1 | 5 | 5  | 14 | 0.635 | 1.059 | 1.250 | 0.698 | 17.68  | 11.61 | 9  | 14 | 491  | 54.7  | 8.25 |
| Q6ZP82 | Coiled-coil domain-containing protein 141<br>OS=Homo sapiens<br>GN=CCDC141<br>PE=1 SV=2 - [CC141_HUMAN]                   | 4.21  | 1 | 3 | 4  | 4  | 1.347 | 0.664 | 1.278 | 0.698 | 5.60   | 4.21  | 4  | 4  | 1450 | 166.2 | 5.58 |
| Q9H3Z4 | DnaJ homolog subfamily C member 5<br>OS=Homo sapiens<br>GN=DNAJCS<br>PE=1 SV=1 - [DNAJCS_HUMAN]                           | 15.15 | 1 | 3 | 3  | 14 | 0.889 | 0.565 | 0.584 | 0.698 | 30.24  | 15.15 | 5  | 14 | 198  | 22.1  | 5.07 |
| Q6EEV4 | DNA-directed RNA polymerase II subunit GRINL1A, isoforms 4/5<br>OS=Homo sapiens<br>GN=POLR2M<br>PE=1 SV=1 - [GLIAD_HUMAN] | 25.00 | 1 | 2 | 2  | 5  | 0.568 | 1.295 | 1.350 | 0.698 | 19.70  | 25.00 | 3  | 5  | 148  | 15.1  | 8.37 |
| O14494 | Lipid phosphate phosphohydrolase 1<br>OS=Homo sapiens<br>GN=PPAP2A<br>PE=1 SV=1 - [LPP1_HUMAN]                            | 11.97 | 1 | 3 | 3  | 8  | 2.495 | 0.502 | 0.698 | 0.698 | 22.48  | 11.97 | 5  | 8  | 284  | 32.1  | 7.97 |
| Q53TN4 | Cytochrome b reductase 1<br>OS=Homo sapiens<br>GN=CYBRD1<br>PE=1 SV=1 - [CYBR1_HUMAN]                                     | 18.53 | 1 | 4 | 4  | 30 | 0.769 | 0.544 | 0.953 | 0.698 | 65.23  | 18.53 | 8  | 30 | 286  | 31.6  | 8.76 |

|        |                                                                                                                |       |   |    |    |    |       |       |       |       |        |       |    |    |     |      |      |
|--------|----------------------------------------------------------------------------------------------------------------|-------|---|----|----|----|-------|-------|-------|-------|--------|-------|----|----|-----|------|------|
| Q9P299 | Coatmer subunit zeta-2<br>OS=Homo sapiens<br>GN=COP22<br>PE=2 SV=1 - [COP22_HUMAN]                             | 27.14 | 1 | 6  | 6  | 27 | 0.784 | 0.813 | 0.979 | 0.699 | 62.20  | 27.14 | 10 | 27 | 210 | 23.5 | 5.17 |
| Q9NSY0 | Nuclear receptor-binding protein 2<br>OS=Homo sapiens<br>GN=NRBP2<br>PE=1 SV=2 - [NRBP2_HUMAN]                 | 4.19  | 1 | 3  | 3  | 4  | 0.970 | 0.931 | 1.014 | 0.699 | 14.39  | 4.19  | 3  | 4  | 501 | 57.8 | 6.49 |
| P52630 | Signal transducer and activator of transcription 2<br>OS=Homo sapiens<br>GN=STAT2<br>PE=1 SV=1 - [STAT2_HUMAN] | 14.34 | 1 | 14 | 14 | 35 | 1.271 | 0.880 | 0.865 | 0.699 | 73.38  | 14.34 | 18 | 35 | 851 | 97.9 | 5.49 |
| Q9UKY4 | Protein O-mannosyl-transferase 2<br>OS=Homo sapiens<br>GN=POMT2<br>PE=1 SV=2 - [POMT2_HUMAN]                   | 0.93  | 1 | 1  | 1  | 3  | 0.721 | 0.602 | 0.369 | 0.700 | 8.49   | 0.93  | 2  | 3  | 750 | 84.2 | 9.16 |
| P80217 | Interferon-induced 35 kDa protein<br>OS=Homo sapiens<br>GN=IFI35<br>PE=1 SV=5 - [IN35_HUMAN]                   | 11.89 | 1 | 4  | 4  | 12 | 0.876 | 1.084 | 0.919 | 0.700 | 29.01  | 11.89 | 7  | 12 | 286 | 31.5 | 6.09 |
| Q15369 | Transcription elongation factor B polypeptide 1<br>OS=Homo sapiens<br>GN=TCEB1<br>PE=1 SV=1 - [ELOC_HUMAN]     | 58.04 | 1 | 5  | 5  | 39 | 1.048 | 0.821 | 1.043 | 0.700 | 100.42 | 58.04 | 9  | 39 | 112 | 12.5 | 4.78 |
| Q9H2F9 | Coiled-coil domain-containing protein 68<br>OS=Homo sapiens<br>GN=CCDC68<br>PE=2 SV=1 - [CCDC68_HUMAN]         | 3.28  | 1 | 1  | 1  | 3  | 1.472 | 0.927 | 1.216 | 0.700 | 1.69   | 3.28  | 1  | 3  | 335 | 38.8 | 8.65 |
| P61964 | WD repeat-containing protein 5<br>OS=Homo sapiens<br>GN=WDR5<br>PE=1 SV=1 - [WDR5_HUMAN]                       | 8.68  | 1 | 2  | 2  | 2  | 0.695 | 1.243 | 0.943 | 0.700 | 4.95   | 8.68  | 2  | 2  | 334 | 36.6 | 8.27 |

|        |                                                                                                                                      |       |   |    |    |     |       |       |       |       |        |       |    |     |      |       |      |
|--------|--------------------------------------------------------------------------------------------------------------------------------------|-------|---|----|----|-----|-------|-------|-------|-------|--------|-------|----|-----|------|-------|------|
| P09884 | DNA<br>polymerase<br>alpha catalytic<br>subunit<br>OS=Homo<br>sapiens<br>GN=POLA1<br>PE=1 SV=2 -<br>[DPOLA_HUMAN<br>]                | 0.55  | 1 | 1  | 1  | 1   | 0.505 | 0.201 | 0.194 | 0.700 | 1.80   | 0.55  | 1  | 1   | 1462 | 165.8 | 5.85 |
| O43399 | Tumor protein<br>D54 OS=Homo<br>sapiens<br>GN=TPD52L2<br>PE=1 SV=2 -<br>[TPD54_HUMAN<br>]                                            | 77.67 | 1 | 19 | 19 | 204 | 0.826 | 1.158 | 1.096 | 0.701 | 522.75 | 77.67 | 34 | 204 | 206  | 22.2  | 5.36 |
| P08962 | CD63 antigen<br>OS=Homo<br>sapiens<br>GN=CD63<br>PE=1 SV=2 -<br>[CD63_HUMAN]                                                         | 19.33 | 1 | 7  | 7  | 72  | 0.570 | 0.601 | 0.581 | 0.701 | 143.61 | 19.33 | 9  | 72  | 238  | 25.6  | 7.81 |
| Q9Y4R8 | Telomere<br>length<br>regulation<br>protein TEL2<br>homolog<br>OS=Homo<br>sapiens<br>GN=TELO2<br>PE=1 SV=2 -<br>[TELO2_HUMAN<br>]    | 1.31  | 1 | 1  | 1  | 2   | 1.056 | 1.022 | 1.090 | 0.701 | 4.04   | 1.31  | 2  | 2   | 837  | 91.7  | 5.76 |
| P29992 | Guanine<br>nucleotide-<br>binding protein<br>subunit alpha-<br>11 OS=Homo<br>sapiens<br>GN=GNA11<br>PE=1 SV=2 -<br>[GNA11_HUMAN<br>] | 48.47 | 1 | 8  | 16 | 57  | 0.950 | 0.732 | 0.962 | 0.701 | 141.89 | 48.47 | 26 | 57  | 359  | 42.1  | 5.69 |
| O14495 | Lipid<br>phosphate<br>phosphohydroly-<br>ase 3<br>OS=Homo<br>sapiens<br>GN=PPAP2B<br>PE=1 SV=1 -<br>[LPP3_HUMAN]                     | 18.65 | 1 | 7  | 7  | 25  | 1.082 | 0.498 | 0.283 | 0.701 | 48.04  | 18.65 | 12 | 25  | 311  | 35.1  | 9.14 |
| Q8NDM7 | Cilia- and<br>flagella-<br>associated<br>protein 43<br>OS=Homo<br>sapiens<br>GN=CFAP43<br>PE=2 SV=3 -<br>[CFA43_HUMAN]               | 1.98  | 1 | 1  | 3  | 12  | 0.438 | 1.069 | 0.984 | 0.701 | 12.77  | 1.98  | 3  | 12  | 1665 | 191.9 | 5.99 |
| O60502 | Protein O-<br>GlcNAcase<br>OS=Homo<br>sapiens<br>GN=MGEA5<br>PE=1 SV=2 -<br>[OGA_HUMAN]                                              | 9.17  | 1 | 8  | 9  | 22  | 0.699 | 1.061 | 1.046 | 0.702 | 45.70  | 9.17  | 14 | 22  | 916  | 102.8 | 4.91 |
| Q15417 | Calponin-3<br>OS=Homo<br>sapiens<br>GN=CNN3<br>PE=1 SV=1 -<br>[CNN3_HUMAN]                                                           | 63.53 | 1 | 17 | 22 | 331 | 1.065 | 0.682 | 1.457 | 0.702 | 837.86 | 63.53 | 31 | 331 | 329  | 36.4  | 6.05 |

|        |                                                                                                                                     |                                                                |      |   |   |   |       |       |       |       |       |       |      |   |      |       |      |      |
|--------|-------------------------------------------------------------------------------------------------------------------------------------|----------------------------------------------------------------|------|---|---|---|-------|-------|-------|-------|-------|-------|------|---|------|-------|------|------|
| Q8TCJ2 | Dolichyl-<br>diphosphooligo<br>saccharide--<br>protein<br>glycosyltransfer<br>ase subunit                                           | STT3B                                                          | 5.21 | 1 | 5 | 5 | 10    | 0.766 | 0.667 | 0.732 | 0.702 | 25.22 | 5.21 | 8 | 10   | 826   | 93.6 | 8.91 |
|        | OS=Homo<br>sapiens<br>GN=STT3B<br>PE=1 SV=1 -<br>[STT3B_HUMAN<br>]                                                                  |                                                                |      |   |   |   |       |       |       |       |       |       |      |   |      |       |      |      |
| Q86XR7 | TIR domain-<br>containing<br>adapter<br>molecule 2                                                                                  | OS=Homo<br>sapiens<br>GN=TICAM2<br>PE=1 SV=1 -<br>[TICAM2_HUMA | 6.38 | 1 | 1 | 1 | 4     | 1.279 | 0.850 | 0.838 | 0.702 | 6.94  | 6.38 | 2 | 4    | 235   | 26.9 | 5.07 |
| P08294 | Extracellular<br>superoxide<br>dismutase [Cu-<br>Zn] OS=Homo<br>sapiens<br>GN=SOD3<br>PE=1 SV=2 -<br>[SODE_HUMAN]                   | 10.00                                                          | 1    | 2 | 2 | 8 | 0.588 | 3.835 | 2.176 | 0.703 | 25.00 | 10.00 | 3    | 8 | 240  | 25.8  | 6.61 |      |
| Q9NRX6 | Protein kish-B<br>OS=Homo<br>sapiens<br>GN=TMEM167B<br>PE=2 SV=1 -<br>[KISHB_HUMAN<br>]                                             | 9.46                                                           | 1    | 1 | 1 | 1 | 0.705 | 1.017 | 0.850 | 0.703 | 1.97  | 9.46  | 1    | 1 | 74   | 8.3   | 9.61 |      |
| Q96JH8 | Ras-associating<br>and dilute<br>domain-<br>containing<br>protein<br>OS=Homo<br>sapiens<br>GN=RADIL<br>PE=1 SV=5 -<br>[RADIL_HUMAN] | 2.60                                                           | 2    | 1 | 2 | 3 | 2.628 |       |       | 0.704 | 4.23  | 2.60  | 3    | 3 | 1075 | 117.4 | 7.09 |      |
| P00519 | Tyrosine-<br>protein kinase<br>ABL1<br>OS=Homo<br>sapiens<br>GN=ABL1 PE=1<br>SV=4 -<br>[ABL1_HUMAN]                                 | 4.69                                                           | 1    | 4 | 4 | 5 | 0.645 | 0.990 | 1.026 | 0.704 | 12.17 | 4.69  | 4    | 5 | 1130 | 122.8 | 8.66 |      |
| B5MCY1 | Tudor domain-<br>containing<br>protein 15<br>OS=Homo<br>sapiens<br>GN=TDRD15<br>PE=2 SV=1 -<br>[TDR15_HUMAN<br>]                    | 0.52                                                           | 1    | 1 | 1 | 1 | 1.356 | 1.144 | 1.150 | 0.704 | 2.78  | 0.52  | 1    | 1 | 1934 | 221.6 | 7.03 |      |
| Q8TAL5 | Uncharacterize<br>d protein<br>C9orf43<br>OS=Homo<br>sapiens<br>GN=C9orf43<br>PE=2 SV=1 -<br>[C1043_HUMAN<br>]                      | 1.74                                                           | 1    | 1 | 1 | 1 | 1.137 | 0.399 | 0.668 | 0.704 | 1.98  | 1.74  | 1    | 1 | 461  | 52.2  | 8.87 |      |

|        |                                                                                                                                                |       |   |    |    |      |       |       |       |       |        |       |    |      |      |       |      |
|--------|------------------------------------------------------------------------------------------------------------------------------------------------|-------|---|----|----|------|-------|-------|-------|-------|--------|-------|----|------|------|-------|------|
| P05067 | Amyloid beta<br>A4 protein<br>OS=Homo<br>sapiens<br>GN=APP PE=1<br>SV=3 -<br>[A4_HUMAN]<br>Ras GTPase-<br>activating-like<br>protein<br>IQGAP2 | 18.18 | 1 | 11 | 12 | 31   | 0.941 | 0.771 | 1.039 | 0.704 | 77.21  | 18.18 | 19 | 31   | 770  | 86.9  | 4.82 |
| Q13576 | OS=Homo<br>sapiens<br>GN=IQGAP2<br>PE=1 SV=4 -<br>[IQGA2_HUMAN<br>]                                                                            | 2.60  | 2 | 2  | 4  | 16   | 0.744 | 1.085 | 0.995 | 0.704 | 25.01  | 2.60  | 6  | 16   | 1575 | 180.5 | 5.64 |
| Q96JY6 | PDZ and LIM<br>domain protein<br>2 OS=Homo<br>sapiens<br>GN=PDLIM2<br>PE=1 SV=1 -<br>[PDLI2_HUMAN]                                             | 43.47 | 1 | 12 | 12 | 54   | 0.687 | 0.532 | 0.738 | 0.705 | 146.26 | 43.47 | 21 | 54   | 352  | 37.4  | 8.72 |
| P30837 | Aldehyde<br>dehydrogenase<br>X,<br>mitochondrial<br>OS=Homo<br>sapiens<br>GN=ALDH1B1<br>PE=1 SV=3 -<br>[AL1B1_HUMAN<br>]                       | 36.56 | 1 | 17 | 19 | 90   | 0.552 | 2.120 | 3.674 | 0.705 | 236.30 | 36.56 | 32 | 90   | 517  | 57.2  | 6.80 |
| Q9C0H2 | Protein tweety<br>homolog 3<br>OS=Homo<br>sapiens<br>GN=TTYH3<br>PE=1 SV=3 -<br>[TTYH3_HUMAN<br>]                                              | 8.03  | 1 | 4  | 4  | 7    | 0.764 | 0.500 | 0.613 | 0.705 | 13.78  | 8.03  | 6  | 7    | 523  | 57.5  | 5.39 |
| P68133 | Actin, alpha<br>skeletal muscle<br>OS=Homo<br>sapiens<br>GN=ACTA1<br>PE=1 SV=1 -<br>[ACTS_HUMAN]                                               | 77.45 | 1 | 3  | 36 | 4663 | 0.879 | 1.034 | 1.217 | 0.705 | #####  | 77.45 | 59 | 4663 | 377  | 42.0  | 5.39 |
| Q86V21 | Acetoacetyl-<br>CoA synthetase<br>OS=Homo<br>sapiens<br>GN=AACS<br>PE=1 SV=1 -<br>[AACS_HUMAN]                                                 | 7.89  | 1 | 6  | 7  | 15   | 0.776 | 0.753 | 1.018 | 0.705 | 26.97  | 7.89  | 8  | 15   | 672  | 75.1  | 6.24 |
| P15848 | Arylsulfatase B<br>OS=Homo<br>sapiens<br>GN=ARSB<br>PE=1 SV=1 -<br>[ARSB_HUMAN]                                                                | 18.39 | 2 | 9  | 9  | 25   | 0.540 | 1.364 | 0.893 | 0.706 | 65.64  | 18.39 | 13 | 25   | 533  | 59.6  | 8.21 |
| Q12934 | Filensin<br>OS=Homo<br>sapiens<br>GN=BFSP1<br>PE=1 SV=3 -<br>[BFSP1_HUMAN<br>]                                                                 | 1.20  | 1 | 1  | 1  | 4    | 0.841 | 1.221 | 1.890 | 0.706 | 10.98  | 1.20  | 1  | 4    | 665  | 74.5  | 5.14 |

|        |                                                                                                                                                                                                                                                                                                                                                                                    |       |   |    |    |     |       |       |       |       |        |       |     |      |      |       |      |
|--------|------------------------------------------------------------------------------------------------------------------------------------------------------------------------------------------------------------------------------------------------------------------------------------------------------------------------------------------------------------------------------------|-------|---|----|----|-----|-------|-------|-------|-------|--------|-------|-----|------|------|-------|------|
| P50583 | Bis(5'-nucleosyl)-<br>tetraphosphat<br>ase<br>[asymmetrical]<br>OS=Homo<br>sapiens<br>GN=NUDT2<br>PE=1 SV=3 -<br>[AP4A_HUMAN]                                                                                                                                                                                                                                                      | 14.97 | 1 | 2  | 2  | 10  | 0.908 | 0.714 | 0.724 | 0.706 | 30.31  | 14.97 | 3   | 10   | 147  | 16.8  | 5.35 |
| Q9UEW8 | STE20/SPS1-<br>related proline-<br>alanine-rich<br>protein kinase<br>OS=Homo<br>sapiens<br>GN=STK39<br>PE=1 SV=3 -<br>[STK39_HUMAN<br>]<br>Protein<br>transport<br>protein Sec24D<br>OS=Homo<br>sapiens<br>GN=SEC24D<br>PE=1 SV=2 -<br>[SC24D_HUMAN<br>]<br>Tyrosine-<br>protein kinase<br>receptor<br>TYRO3<br>OS=Homo<br>sapiens<br>GN=TYRO3<br>PE=1 SV=1 -<br>[TYRO3_HUMA<br>N] | 23.85 | 1 | 8  | 12 | 31  | 0.735 | 1.062 | 1.755 | 0.706 | 82.23  | 23.85 | 17  | 31   | 545  | 59.4  | 6.29 |
| O94855 | Testis-specific Y-<br>encoded-like<br>protein 6<br>OS=Homo<br>sapiens<br>GN=TSPYL6<br>PE=2 SV=1 -<br>[TSPYL6_HUMAN<br>]<br>Engulfment<br>and cell motility<br>protein 3<br>OS=Homo<br>sapiens<br>GN=ELMO3<br>PE=2 SV=3 -<br>[ELMO3_HUMA<br>N]                                                                                                                                      | 20.64 | 1 | 19 | 20 | 76  | 0.687 | 0.689 | 0.743 | 0.706 | 175.87 | 20.64 | 30  | 76   | 1032 | 112.9 | 7.25 |
| Q06418 | Tropomodulin-<br>1 OS=Homo<br>sapiens<br>GN=TMOD1<br>PE=1 SV=1 -<br>[TMOD1_HUMA<br>N]<br>SH3 domain-<br>binding<br>glutamic acid-<br>rich-like protein<br>OS=Homo<br>sapiens<br>GN=SH3BGRL<br>PE=1 SV=1 -<br>[SH3L1_HUMAN<br>]                                                                                                                                                     | 0.90  | 1 | 1  | 1  | 1   | 0.866 | 0.655 | 1.152 | 0.707 | 2.21   | 0.90  | 1   | 1    | 890  | 96.8  | 5.67 |
| Q8N831 | OS=Homo<br>sapiens<br>GN=TYRO3<br>PE=1 SV=1 -<br>[TYRO3_HUMA<br>N]                                                                                                                                                                                                                                                                                                                 | 8.05  | 1 | 1  | 2  | 2   | 1.149 | 0.707 | 2.34  | 8.05  | 2      | 2     | 410 | 45.8 | 5.68 |       |      |
| Q96BJ8 | OS=Homo<br>sapiens<br>GN=ELMO3<br>PE=2 SV=3 -<br>[ELMO3_HUMA<br>N]                                                                                                                                                                                                                                                                                                                 | 1.94  | 1 | 1  | 1  | 1   | 0.768 | 0.934 | 1.159 | 0.707 | 2.17   | 1.94  | 1   | 1    | 720  | 81.4  | 6.30 |
| P28289 | OS=Homo<br>sapiens<br>GN=TMOD1<br>PE=1 SV=1 -<br>[TMOD1_HUMA<br>N]                                                                                                                                                                                                                                                                                                                 | 10.86 | 1 | 3  | 4  | 9   | 1.151 | 2.008 | 1.042 | 0.707 | 16.62  | 10.86 | 6   | 9    | 359  | 40.5  | 5.10 |
| O75368 | OS=Homo<br>sapiens<br>GN=SH3BGRL<br>PE=1 SV=1 -<br>[SH3L1_HUMAN<br>]                                                                                                                                                                                                                                                                                                               | 91.23 | 1 | 11 | 11 | 135 | 1.069 | 1.307 | 1.190 | 0.707 | 266.99 | 91.23 | 19  | 135  | 114  | 12.8  | 5.25 |

|        |                                                                                                               |       |   |    |    |     |       |       |       |       |         |       |    |     |     |       |      |
|--------|---------------------------------------------------------------------------------------------------------------|-------|---|----|----|-----|-------|-------|-------|-------|---------|-------|----|-----|-----|-------|------|
| Q9Y2H1 | Serine/threonine-protein kinase 38-like<br>OS=Homo sapiens<br>GN=STK38L<br>PE=1 SV=3 - [ST38L_HUMAN]          | 1.72  | 1 | 1  | 1  | 2   | 0.577 | 0.926 | 0.818 | 0.707 | 7.47    | 1.72  | 1  | 2   | 464 | 54.0  | 6.81 |
| O00560 | Syntenin-1<br>OS=Homo sapiens<br>GN=SDCBP<br>PE=1 SV=1 - [SDCB1_HUMAN]                                        | 12.08 | 1 | 3  | 3  | 5   | 0.790 | 0.844 | 1.103 | 0.707 | 8.19    | 12.08 | 4  | 5   | 298 | 32.4  | 7.53 |
| Q8TCG5 | Carnitine O-palmitoyltransferase 1, brain isoform<br>OS=Homo sapiens<br>GN=CPT1C<br>PE=1 SV=1 - [CPT1C_HUMAN] | 2.99  | 1 | 2  | 2  | 2   | 1.271 | 0.911 | 1.106 | 0.708 | 1.83    | 2.99  | 2  | 2   | 803 | 90.9  | 8.12 |
| Q7Z304 | MAM domain-containing protein 2<br>OS=Homo sapiens<br>GN=MAMDC2<br>PE=2 SV=3 - [MAMC2_HUMAN]                  | 1.31  | 1 | 1  | 1  | 1   | 0.652 | 0.770 | 0.672 | 0.708 | 0.00    | 1.31  | 1  | 1   | 686 | 77.5  | 5.16 |
| Q15942 | Zyxin<br>OS=Homo sapiens<br>GN=ZYX PE=1 SV=1 - [ZYX_HUMAN]                                                    | 43.88 | 1 | 19 | 19 | 405 | 0.862 | 1.156 | 1.699 | 0.708 | 1180.55 | 43.88 | 32 | 405 | 572 | 61.2  | 6.67 |
| Q05586 | Glutamate receptor ionotropic, NMDA 1<br>OS=Homo sapiens<br>GN=GRIN1<br>PE=1 SV=1 - [NMDZ1_HUMAN]             | 0.85  | 1 | 1  | 1  | 3   | 0.987 | 0.863 | 1.084 | 0.708 | 8.34    | 0.85  | 1  | 3   | 938 | 105.3 | 8.88 |
| Q9UJV3 | Probable E3 ubiquitin-protein ligase MID2<br>OS=Homo sapiens<br>GN=MID2<br>PE=1 SV=3 - [TRIM1_HUMAN]          | 4.22  | 1 | 2  | 3  | 3   | 0.869 | 0.734 | 0.515 | 0.708 | 7.24    | 4.22  | 3  | 3   | 735 | 83.2  | 7.39 |
| Q9H8Y8 | Golgi reassembly-stacking protein 2<br>OS=Homo sapiens<br>GN=GORASP2<br>PE=1 SV=3 - [GORS2_HUMAN]             | 24.12 | 1 | 8  | 9  | 44  | 0.883 | 0.823 | 0.810 | 0.708 | 118.07  | 24.12 | 13 | 44  | 452 | 47.1  | 4.82 |



|        |                                                                                                                 |       |   |     |     |      |       |       |       |       |        |       |     |      |      |       |      |
|--------|-----------------------------------------------------------------------------------------------------------------|-------|---|-----|-----|------|-------|-------|-------|-------|--------|-------|-----|------|------|-------|------|
| Q09666 | Neuroblast differentiation-associated protein AHNAK<br>OS=Homo sapiens<br>GN=AHNAK<br>PE=1 SV=2 - [AHNK_HUMAN]  | 81.24 | 2 | 393 | 397 | 4715 | 1.423 | 1.205 | 1.134 | 0.708 | #####  | 81.24 | 680 | 4715 | 5890 | 628.7 | 6.15 |
| O14529 | Homeobox protein cut-like 2<br>OS=Homo sapiens<br>GN=CUX2<br>PE=1 SV=4 - [CUX2_HUMAN]                           | 2.36  | 1 | 2   | 2   | 2    | 0.803 | 0.977 | 0.705 | 0.709 | 4.34   | 2.36  | 2   | 2    | 1486 | 161.6 | 5.48 |
| Q07864 | DNA polymerase epsilon catalytic subunit A<br>OS=Homo sapiens<br>GN=POLE<br>PE=1 SV=5 - [DPOE1_HUMAN]           | 1.49  | 1 | 2   | 3   | 5    | 0.680 | 0.862 | 0.970 | 0.709 | 5.56   | 1.49  | 4   | 5    | 2286 | 261.4 | 6.39 |
| P08648 | Integrin alpha-5<br>OS=Homo sapiens<br>GN=ITGA5<br>PE=1 SV=2 - [ITA5_HUMAN]                                     | 17.06 | 1 | 13  | 14  | 64   | 0.767 | 0.923 | 1.144 | 0.709 | 170.38 | 17.06 | 21  | 64   | 1049 | 114.5 | 5.77 |
| P50148 | Guanine nucleotide-binding protein G(q) subunit alpha<br>OS=Homo sapiens<br>GN=GNAQ<br>PE=1 SV=4 - [GNAQ_HUMAN] | 33.15 | 1 | 7   | 13  | 44   | 0.966 | 1.068 | 1.089 | 0.709 | 98.69  | 33.15 | 19  | 44   | 359  | 42.1  | 5.68 |
| Q9Y2M5 | Kelch-like protein 20<br>OS=Homo sapiens<br>GN=KLHL20<br>PE=1 SV=4 - [KLH20_HUMAN]                              | 2.63  | 1 | 1   | 1   | 1    | 0.812 | 2.041 | 2.324 | 0.710 | 0.00   | 2.63  | 1   | 1    | 609  | 67.9  | 6.87 |
| Q9H3H3 | UPF0696 protein C11orf68<br>OS=Homo sapiens<br>GN=C11orf68<br>PE=1 SV=2 - [CK068_HUMAN]                         | 13.15 | 1 | 3   | 3   | 12   | 0.882 | 0.853 | 0.912 | 0.710 | 30.91  | 13.15 | 6   | 12   | 251  | 27.3  | 5.45 |
| Q9ULJ8 | Neurabin-1<br>OS=Homo sapiens<br>GN=PPP1R9A<br>PE=1 SV=2 - [NEB1_HUMAN]                                         | 2.19  | 1 | 2   | 4   | 10   | 1.643 | 0.811 | 0.906 | 0.710 | 18.58  | 2.19  | 5   | 10   | 1098 | 123.3 | 5.10 |
| Q9HAP2 | MLX-interacting protein<br>OS=Homo sapiens<br>GN=MLXIP<br>PE=1 SV=2 - [MLXIP_HUMAN]                             | 7.94  | 1 | 6   | 6   | 10   | 0.486 | 0.535 | 0.614 | 0.710 | 30.67  | 7.94  | 8   | 10   | 919  | 101.1 | 8.35 |

|        |                                                                                                                                             |       |   |    |    |     |       |       |       |       |        |       |    |     |      |       |      |
|--------|---------------------------------------------------------------------------------------------------------------------------------------------|-------|---|----|----|-----|-------|-------|-------|-------|--------|-------|----|-----|------|-------|------|
| P22392 | Nucleoside diphosphate kinase B<br>OS=Homo sapiens<br>GN=NME2<br>PE=1 SV=1 - [NDKB_HUMAN]                                                   | 84.21 | 2 | 9  | 14 | 373 | 0.770 | 0.793 | 0.720 | 0.710 | 751.93 | 84.21 | 25 | 373 | 152  | 17.3  | 8.41 |
| Q9BQD3 | KxDL motif-containing protein 1<br>OS=Homo sapiens<br>GN=KXD1<br>PE=1 SV=2 - [KXDL1_HUMAN]                                                  | 4.55  | 1 | 2  | 2  | 2   | 0.747 | 0.800 | 1.230 | 0.710 | 5.25   | 4.55  | 2  | 2   | 176  | 19.7  | 4.89 |
| Q8WXG6 | MAP kinase-activating death domain protein<br>OS=Homo sapiens<br>GN=MADD<br>PE=1 SV=2 - [MADD_HUMAN]                                        | 1.52  | 1 | 2  | 2  | 3   | 0.698 | 0.510 | 0.785 | 0.710 | 8.30   | 1.52  | 2  | 3   | 1647 | 183.2 | 6.04 |
| O00329 | Phosphatidylinositol 4,5-bisphosphate 3-kinase catalytic subunit delta isoform<br>OS=Homo sapiens<br>GN=PIK3CD<br>PE=1 SV=2 - [PK3CD_HUMAN] | 0.67  | 1 | 1  | 1  | 1   | 0.721 | 0.957 | 0.848 | 0.711 | 2.14   | 0.67  | 1  | 1   | 1044 | 119.4 | 7.18 |
| Q6PIY5 | Uncharacterized protein C1orf228<br>OS=Homo sapiens<br>GN=C1orf228<br>PE=2 SV=2 - [CA228_HUMAN]                                             | 4.32  | 1 | 1  | 2  | 2   | 1.065 | 0.360 | 0.500 | 0.711 | 3.05   | 4.32  | 2  | 2   | 440  | 48.8  | 5.74 |
| Q8IYR2 | SET and MYND domain-containing protein 4<br>OS=Homo sapiens<br>GN=SMYD4<br>PE=2 SV=3 - [SMYD4_HUMAN]                                        | 1.62  | 1 | 1  | 1  | 3   | 0.778 | 1.418 | 1.662 | 0.711 | 3.09   | 1.62  | 2  | 3   | 804  | 89.2  | 6.83 |
| P12110 | Collagen alpha-2(VI) chain<br>OS=Homo sapiens<br>GN=COL6A2<br>PE=1 SV=4 - [CO6A2_HUMAN]                                                     | 41.51 | 1 | 37 | 37 | 201 | 0.628 | 1.202 | 1.362 | 0.711 | 482.57 | 41.51 | 62 | 201 | 1019 | 108.5 | 6.21 |
| Q9Y6R6 | Zinc finger protein 780B<br>OS=Homo sapiens<br>GN=ZNF780B<br>PE=2 SV=1 - [Z780B_HUMAN]                                                      | 2.64  | 1 | 2  | 2  | 2   | 1.107 | 1.075 | 1.220 | 0.711 | 5.78   | 2.64  | 2  | 2   | 833  | 96.7  | 8.92 |

|        |                                                                                                       |       |   |    |    |     |       |       |       |       |        |       |    |     |     |      |      |
|--------|-------------------------------------------------------------------------------------------------------|-------|---|----|----|-----|-------|-------|-------|-------|--------|-------|----|-----|-----|------|------|
| P50579 | Methionine aminopeptidase 2 OS=Homo sapiens<br>GN=METAP2<br>PE=1 SV=1 - [MAP2_HUMAN]                  | 31.38 | 1 | 12 | 12 | 68  | 0.729 | 1.258 | 0.844 | 0.712 | 219.66 | 31.38 | 19 | 68  | 478 | 52.9 | 5.82 |
| Q6EMK4 | Vasorin OS=Homo sapiens<br>GN=VASN<br>PE=1 SV=1 - [VASN_HUMAN]                                        | 9.96  | 1 | 7  | 7  | 29  | 0.826 | 0.975 | 0.798 | 0.712 | 88.84  | 9.96  | 11 | 29  | 673 | 71.7 | 7.39 |
| Q8WVJ2 | NudC domain-containing protein 2 OS=Homo sapiens<br>GN=NUDC2<br>PE=1 SV=1 - [NUDC2_HUMAN]             | 37.58 | 1 | 5  | 5  | 19  | 1.037 | 1.519 | 0.968 | 0.712 | 48.97  | 37.58 | 9  | 19  | 157 | 17.7 | 5.07 |
| P21589 | 5'-nucleotidase OS=Homo sapiens<br>GN=NT5E<br>PE=1 SV=1 - [SNTD_HUMAN]                                | 52.44 | 1 | 26 | 27 | 148 | 0.926 | 2.102 | 1.120 | 0.712 | 332.69 | 52.44 | 43 | 148 | 574 | 63.3 | 7.03 |
| Q9H223 | EH domain-containing protein 4 OS=Homo sapiens<br>GN=EHD4<br>PE=1 SV=1 - [EHD4_HUMAN]                 | 36.78 | 2 | 16 | 26 | 92  | 0.831 | 1.371 | 1.057 | 0.712 | 193.44 | 36.78 | 41 | 92  | 541 | 61.1 | 6.76 |
| P50452 | Serpin B8 OS=Homo sapiens<br>GN=SERPINB8<br>PE=1 SV=2 - [SPB8_HUMAN]                                  | 10.70 | 1 | 3  | 4  | 9   | 1.492 | 1.551 | 1.094 | 0.712 | 20.06  | 10.70 | 6  | 9   | 374 | 42.7 | 5.57 |
| A11GU5 | Rho guanine nucleotide exchange factor 37 OS=Homo sapiens<br>GN=ARHGEF37<br>PE=2 SV=2 - [ARH37_HUMAN] | 0.89  | 1 | 1  | 1  | 1   | 0.726 | 0.967 | 0.917 | 0.712 | 2.31   | 0.89  | 1  | 1   | 675 | 76.2 | 6.93 |
| Q9NRX5 | Serine incorporator 1 OS=Homo sapiens<br>GN=SERINC1<br>PE=1 SV=1 - [SERC1_HUMAN]                      | 3.75  | 1 | 1  | 1  | 2   | 0.768 | 0.563 | 0.868 | 0.712 | 5.02   | 3.75  | 2  | 2   | 453 | 50.5 | 5.85 |
| Q8NCA9 | Zinc finger protein 784 OS=Homo sapiens<br>GN=ZNF784<br>PE=2 SV=1 - [ZNF784_HUMAN]                    | 6.50  | 1 | 1  | 1  | 1   | 0.615 | 0.886 | 0.679 | 0.712 | 0.00   | 6.50  | 1  | 1   | 323 | 34.2 | 7.80 |
| Q8WTZ3 | Zinc finger protein ENSP00000375 OS=Homo sapiens<br>PE=2 SV=1 - [YS049_HUMAN]                         | 6.72  | 1 | 1  | 1  | 1   | 1.155 | 1.110 | 0.981 | 0.712 | 0.00   | 6.72  | 1  | 1   | 238 | 27.1 | 8.54 |

|        |                                                                                                                                      |       |   |   |    |      |       |       |       |       |         |       |    |      |       |       |      |
|--------|--------------------------------------------------------------------------------------------------------------------------------------|-------|---|---|----|------|-------|-------|-------|-------|---------|-------|----|------|-------|-------|------|
| Q14679 | Tubulin<br>polyglutamylase<br>TTL4<br>OS=Homo<br>sapiens<br>GN=TTL4<br>PE=1 SV=2 -<br>[TTL4_HUMAN]                                   | 1.75  | 1 | 2 | 2  | 2    | 0.668 | 1.088 | 0.919 | 0.713 | 4.97    | 1.75  | 2  | 2    | 1199  | 133.3 | 8.85 |
| Q5SVZ6 | Zinc finger<br>MYM-type<br>protein 1<br>OS=Homo<br>sapiens<br>GN=ZMYM1<br>PE=2 SV=1 -<br>[ZMYM1_HUMAN]                               | 1.40  | 1 | 1 | 1  | 1    | 1.329 | 0.609 | 1.010 | 0.713 | 2.84    | 1.40  | 1  | 1    | 1142  | 128.6 | 7.44 |
| P39059 | Collagen alpha-<br>1(XV) chain<br>OS=Homo<br>sapiens<br>GN=COL15A1<br>PE=1 SV=2 -<br>[COFA1_HUMAN]                                   | 5.91  | 1 | 7 | 7  | 21   | 0.370 | 0.828 | 0.573 | 0.713 | 41.57   | 5.91  | 12 | 21   | 1388  | 141.6 | 5.00 |
| Q96LR5 | Ubiquitin-<br>conjugating<br>enzyme E2 E2<br>OS=Homo<br>sapiens<br>GN=UBE2E2<br>PE=1 SV=1 -<br>[UB2E2_HUMAN]                         | 11.44 | 2 | 1 | 2  | 6    | 1.034 | 1.707 | 1.484 | 0.713 | 17.60   | 11.44 | 2  | 6    | 201   | 22.2  | 7.71 |
| Q14525 | Keratin, type I<br>cuticular Ha3-II<br>OS=Homo<br>sapiens<br>GN=KRT33B<br>PE=2 SV=3 -<br>[KT33B_HUMAN]                               | 4.21  | 7 | 1 | 2  | 6    | 0.507 | 0.431 | 0.315 | 0.714 | 9.47    | 4.21  | 3  | 6    | 404   | 46.2  | 4.84 |
| Q8NHJ3 | Phosphatidylch<br>oline:ceramide<br>cholinephospho<br>transferase 2<br>OS=Homo<br>sapiens<br>GN=SGMS2<br>PE=1 SV=1 -<br>[SMS2_HUMAN] | 2.19  | 1 | 1 | 1  | 2    | 0.590 | 0.456 | 0.729 | 0.714 | 4.63    | 2.19  | 1  | 2    | 365   | 42.3  | 8.81 |
| Q13885 | Tubulin beta-<br>2A chain<br>OS=Homo<br>sapiens<br>GN=TUBB2A<br>PE=1 SV=1 -<br>[TBB2A_HUMAN]                                         | 63.37 | 1 | 5 | 23 | 1090 | 1.009 | 1.030 | 1.475 | 0.715 | 2299.56 | 63.37 | 43 | 1090 | 445   | 49.9  | 4.89 |
| Q8TD57 | Dynein heavy<br>chain 3,<br>axonemal<br>OS=Homo<br>sapiens<br>GN=DNAH3<br>PE=2 SV=1 -<br>[DYH3_HUMAN]                                | 0.53  | 1 | 1 | 2  | 3    | 0.759 | 2.174 | 0.715 | 2.59  | 0.53    | 2     | 3  | 4116 | 470.5 | 6.43  |      |
| P62633 | Cellular nudeic<br>acid-binding<br>protein<br>OS=Homo<br>sapiens<br>GN=CNBP<br>PE=1 SV=1 -<br>[CNBP_HUMAN]                           | 24.86 | 1 | 4 | 4  | 13   | 0.781 | 0.548 | 0.758 | 0.715 | 32.72   | 24.86 | 6  | 13   | 177   | 19.4  | 7.71 |

|        |                                                                                                                                            |       |   |    |    |    |       |       |       |       |        |       |    |    |     |       |      |
|--------|--------------------------------------------------------------------------------------------------------------------------------------------|-------|---|----|----|----|-------|-------|-------|-------|--------|-------|----|----|-----|-------|------|
| O95453 | Poly(A)-specific<br>ribonuclease<br>PARN<br>OS=Homo<br>sapiens<br>GN=PARN<br>PE=1 SV=1 -<br>[PARN_HUMAN]                                   | 9.70  | 1 | 5  | 5  | 11 | 1.135 | 0.899 | 0.933 | 0.715 | 30.85  | 9.70  | 7  | 11 | 639 | 73.4  | 6.20 |
| Q9H009 | Nascent<br>polypeptide-<br>associated<br>complex<br>subunit alpha-<br>2 OS=Homo<br>sapiens<br>GN=NACA2<br>PE=1 SV=1 -<br>[NACA2_HUMAN<br>] | 6.98  | 1 | 1  | 1  | 22 | 1.152 | 1.200 | 0.782 | 0.715 | 53.01  | 6.98  | 2  | 22 | 215 | 23.2  | 4.73 |
| Q9Y303 | Putative N-<br>acetylglucosami<br>ne-6-<br>phosphate<br>deacetylase<br>OS=Homo<br>sapiens<br>GN=AMDHD2<br>PE=1 SV=2 -<br>[NAGA_HUMAN]      | 7.58  | 1 | 2  | 2  | 4  | 1.113 | 1.138 | 0.835 | 0.715 | 7.59   | 7.58  | 3  | 4  | 409 | 43.7  | 6.70 |
| O95295 | SNARE-<br>associated<br>protein Snapin<br>OS=Homo<br>sapiens<br>GN=SNAPIN<br>PE=1 SV=1 -<br>[SNAPN_HUMAN<br>]                              | 30.15 | 1 | 3  | 3  | 10 | 1.043 | 0.825 | 1.048 | 0.715 | 27.14  | 30.15 | 4  | 10 | 136 | 14.9  | 9.31 |
| Q7Z3Z3 | Piwi-like<br>protein 3<br>OS=Homo<br>sapiens<br>GN=PIWIL3<br>PE=2 SV=2 -<br>[PIWIL3_HUMAN]                                                 | 1.47  | 1 | 1  | 1  | 2  | 0.712 | 1.389 | 1.854 | 0.716 | 6.73   | 1.47  | 1  | 2  | 882 | 101.0 | 9.51 |
| P21246 | Pleiotrophin<br>OS=Homo<br>sapiens<br>GN=PTN PE=1<br>SV=1 -<br>[PTN_HUMAN]                                                                 | 12.50 | 1 | 2  | 2  | 5  | 1.153 | 1.372 | 0.496 | 0.716 | 2.38   | 12.50 | 4  | 5  | 168 | 18.9  | 9.60 |
| P68402 | Platelet-<br>activating<br>factor<br>acetylhydrolase<br>IB subunit<br>beta<br>OS=Homo<br>sapiens<br>GN=PAFAH1B2<br>PE=1 SV=1 -<br>General  | 41.48 | 1 | 6  | 7  | 21 | 1.020 | 0.836 | 0.820 | 0.716 | 29.94  | 41.48 | 9  | 21 | 229 | 25.6  | 5.92 |
| P78347 | transcription<br>factor II-I<br>OS=Homo<br>sapiens<br>GN=GTF2I<br>PE=1 SV=2 -<br>[GTF2I_HUMAN<br>]                                         | 30.06 | 3 | 26 | 26 | 72 | 0.907 | 1.281 | 1.086 | 0.716 | 160.16 | 30.06 | 37 | 72 | 998 | 112.3 | 6.39 |

|        |                                                                                                                         |       |   |    |    |     |       |       |       |       |        |       |    |     |      |       |      |
|--------|-------------------------------------------------------------------------------------------------------------------------|-------|---|----|----|-----|-------|-------|-------|-------|--------|-------|----|-----|------|-------|------|
| P51957 | Serine/threonine-protein kinase Nek4<br>OS=Homo sapiens<br>GN=NEK4<br>PE=1 SV=2 - [NEK4_HUMAN]                          | 1.43  | 1 | 1  | 1  | 1   | 0.783 | 0.687 | 0.910 | 0.716 | 2.31   | 1.43  | 1  | 1   | 841  | 94.5  | 7.90 |
| Q6UB35 | Monofunctional C1-tetrahydrofolate synthase, mitochondrial<br>OS=Homo sapiens<br>GN=MTHFD1L<br>PE=1 SV=1 - [C1TM_HUMAN] | 19.94 | 1 | 18 | 19 | 63  | 0.953 | 0.751 | 0.711 | 0.716 | 126.90 | 19.94 | 33 | 63  | 978  | 105.7 | 8.06 |
| Q06033 | Inter-alpha-trypsin inhibitor heavy chain H3<br>OS=Homo sapiens<br>GN=ITIHB<br>PE=1 SV=2 - [ITIHB_HUMAN]                | 7.64  | 1 | 8  | 8  | 16  | 0.522 | 0.668 | 0.731 | 0.717 | 24.70  | 7.64  | 12 | 16  | 890  | 99.8  | 5.74 |
| Q8N370 | Large neutral amino acids transporter small subunit 4<br>OS=Homo sapiens<br>GN=SLC43A2<br>PE=1 SV=1 - [LAT4_HUMAN]      | 1.41  | 1 | 1  | 1  | 1   | 1.079 | 1.135 | 1.127 | 0.717 | 2.58   | 1.41  | 1  | 1   | 569  | 62.7  | 7.94 |
| P58335 | Anthrax toxin receptor 2<br>OS=Homo sapiens<br>GN=ANTXR2<br>PE=1 SV=5 - [ANTR2_HUMAN]                                   | 10.63 | 1 | 3  | 6  | 12  | 0.774 | 1.283 | 0.789 | 0.717 | 15.97  | 10.63 | 10 | 12  | 489  | 53.6  | 7.46 |
| Q9H4I9 | Essential MCU regulator, mitochondrial<br>OS=Homo sapiens<br>GN=SMDT1<br>PE=1 SV=1 - [EMRE_HUMAN]                       | 9.35  | 1 | 1  | 1  | 1   | 1.246 | 0.713 | 0.601 | 0.718 | 3.47   | 9.35  | 1  | 1   | 107  | 11.4  | 7.27 |
| P35611 | Alpha-adducin<br>OS=Homo sapiens<br>GN=ADD1<br>PE=1 SV=2 - [ADDA_HUMAN]                                                 | 27.54 | 1 | 19 | 20 | 123 | 0.931 | 1.162 | 0.951 | 0.718 | 281.50 | 27.54 | 33 | 123 | 737  | 80.9  | 5.83 |
| O75146 | Huntingtin-interacting protein 1-related protein<br>OS=Homo sapiens<br>GN=HIP1R<br>PE=1 SV=2 - [HIP1R_HUMAN]            | 6.65  | 1 | 4  | 6  | 9   | 0.834 | 1.473 | 0.976 | 0.718 | 20.89  | 6.65  | 7  | 9   | 1068 | 119.3 | 6.67 |

|        |                                                                                                                                                                                               |       |   |    |    |     |       |       |       |       |         |       |     |     |      |       |      |
|--------|-----------------------------------------------------------------------------------------------------------------------------------------------------------------------------------------------|-------|---|----|----|-----|-------|-------|-------|-------|---------|-------|-----|-----|------|-------|------|
| Q8NHUJ | Cilia- and flagella-associated protein 61<br>OS=Homo sapiens<br>GN=CFAP61<br>PE=2 SV=3 - [CFA61_HUMAN<br>FGFR1 oncogene partner<br>OS=Homo sapiens<br>GN=FGFR1OP<br>PE=1 SV=1 - [FR1OP_HUMAN] | 1.62  | 1 | 2  | 2  | 2   | 0.831 | 1.293 | 0.755 | 0.718 | 2.29    | 1.62  | 2   | 2   | 1237 | 141.3 | 6.16 |
| O95684 | Ras-related protein Rab-4A<br>OS=Homo sapiens<br>GN=RAB4A<br>PE=1 SV=3 - [RAB4A_HUMAN]                                                                                                        | 4.01  | 1 | 1  | 1  | 1   | 0.817 | 1.403 | 0.949 | 0.718 | 0.00    | 4.01  | 1   | 1   | 399  | 43.0  | 4.81 |
| P20338 | E3 ubiquitin-protein ligase Midline-1<br>OS=Homo sapiens<br>GN=MID1<br>PE=1 SV=1 - [TRI18_HUMAN]                                                                                              | 30.28 | 2 | 5  | 7  | 46  | 0.792 | 0.968 | 0.918 | 0.718 | 117.77  | 30.28 | 11  | 46  | 218  | 24.4  | 6.07 |
| O15344 | Signal transducing adapter molecule 1<br>OS=Homo sapiens<br>GN=STAM<br>PE=1 SV=3 - [STAM1_HUMA<br>Adipogenesis regulatory factor<br>OS=Homo sapiens<br>GN=ADIRF<br>PE=1 SV=1 - [ADIRF_HUMAN]  | 10.19 | 1 | 5  | 6  | 12  | 0.706 | 0.869 | 0.863 | 0.718 | 24.30   | 10.19 | 9   | 12  | 667  | 75.2  | 6.80 |
| Q92783 | N(G),N(G)-dimethylarginine dimethylaminohydrolase 2<br>OS=Homo sapiens<br>GN=DDAH2<br>PE=1 SV=1 - [DDAH2_HUMAN]                                                                               | 26.11 | 1 | 11 | 13 | 26  | 0.878 | 0.735 | 0.831 | 0.719 | 67.26   | 26.11 | 20  | 26  | 540  | 59.1  | 4.82 |
| Q15847 | Sterol O-acyltransferase 1<br>OS=Homo sapiens<br>GN=SOAT1<br>PE=1 SV=3 - [SOAT1_HUMAN]                                                                                                        | 36.84 | 1 | 2  | 3  | 11  | 0.644 | 1.299 | 1.095 | 0.719 | 27.97   | 36.84 | 4   | 11  | 76   | 7.8   | 5.31 |
| O95865 | Caldesmon<br>OS=Homo sapiens<br>GN=CALD1<br>PE=1 SV=3 - [CALD1_HUMAN]                                                                                                                         | 34.04 | 1 | 7  | 8  | 62  | 1.383 | 1.244 | 1.062 | 0.719 | 170.79  | 34.04 | 16  | 62  | 285  | 29.6  | 6.01 |
| P35610 |                                                                                                                                                                                               | 4.36  | 1 | 2  | 2  | 4   | 0.926 | 0.873 | 0.995 | 0.719 | 9.53    | 4.36  | 3   | 4   | 550  | 64.7  | 8.94 |
| Q05682 |                                                                                                                                                                                               | 58.13 | 2 | 66 | 68 | 732 | 1.273 | 0.951 | 1.467 | 0.719 | 1863.26 | 58.13 | 105 | 732 | 793  | 93.2  | 5.66 |

|        |                                                                                                                                    |       |   |    |    |     |       |       |       |       |        |       |    |     |      |       |      |
|--------|------------------------------------------------------------------------------------------------------------------------------------|-------|---|----|----|-----|-------|-------|-------|-------|--------|-------|----|-----|------|-------|------|
| O43150 | Arf-GAP with SH3 domain, ANK repeat and PH domain-containing protein 2<br>OS=Homo sapiens<br>GN=ASAP2<br>PE=1 SV=3 - [ASAP2_HUMAN] | 4.17  | 1 | 3  | 5  | 42  | 0.908 | 0.976 | 0.997 | 0.719 | 80.55  | 4.17  | 8  | 42  | 1006 | 111.6 | 6.68 |
| Q9UJ70 | N-acetyl-D-glucosamine kinase<br>OS=Homo sapiens<br>GN=NAGK<br>PE=1 SV=4 - [NAGK_HUMAN]                                            | 43.31 | 1 | 14 | 14 | 105 | 0.911 | 0.913 | 1.100 | 0.719 | 323.01 | 43.31 | 25 | 105 | 344  | 37.4  | 6.24 |
| Q9NSY2 | STAR-related lipid transfer protein 5<br>OS=Homo sapiens<br>GN=STARD5<br>PE=1 SV=2 - [STARS_HUMAN]                                 | 11.74 | 1 | 3  | 3  | 10  | 0.389 | 0.775 | 0.968 | 0.720 | 22.48  | 11.74 | 6  | 10  | 213  | 23.8  | 6.67 |
| Q16512 | Serine/threonine-protein kinase N1<br>OS=Homo sapiens<br>GN=PKN1<br>PE=1 SV=2 - [PKN1_HUMAN]                                       | 14.54 | 2 | 9  | 12 | 22  | 0.860 | 1.038 | 1.213 | 0.720 | 57.16  | 14.54 | 15 | 22  | 942  | 103.9 | 6.37 |
| Q8TDQ7 | Glucosamine-6-phosphate isomerase 2<br>OS=Homo sapiens<br>GN=GNPDA2<br>PE=1 SV=1 - [GNPI2_HUMAN]                                   | 26.09 | 1 | 4  | 6  | 15  | 0.717 | 0.687 | 0.680 | 0.720 | 28.69  | 26.09 | 8  | 15  | 276  | 31.1  | 6.95 |
| Q7Z7M0 | Multiple epidermal growth factor-like domains protein 8<br>OS=Homo sapiens<br>GN=MEGF8<br>PE=1 SV=2 - [MEGF8_HUMAN]                | 0.46  | 1 | 1  | 1  | 3   | 0.803 | 1.148 | 0.950 | 0.720 | 9.65   | 0.46  | 1  | 3   | 2845 | 302.9 | 6.87 |
| Q6IN84 | rRNA methyltransferase 1, mitochondrial<br>OS=Homo sapiens<br>GN=MRM1<br>PE=1 SV=1 - [MRM1_HUMAN]                                  | 5.10  | 1 | 1  | 2  | 4   | 0.572 | 1.809 | 1.257 | 0.720 | 6.84   | 5.10  | 3  | 4   | 353  | 38.6  | 7.94 |
| P52594 | Arf-GAP domain and FG repeat-containing protein 1<br>OS=Homo sapiens<br>GN=AGFG1<br>PE=1 SV=2 - [AGFG1_HUMAN]                      | 11.39 | 1 | 5  | 5  | 21  | 0.805 | 0.679 | 0.866 | 0.720 | 62.37  | 11.39 | 7  | 21  | 562  | 58.2  | 8.63 |



|        |                                                                                                                      |       |   |   |   |    |       |       |       |       |       |       |   |    |      |       |      |
|--------|----------------------------------------------------------------------------------------------------------------------|-------|---|---|---|----|-------|-------|-------|-------|-------|-------|---|----|------|-------|------|
| Q496M5 | Inactive serine/threonine-protein kinase PLK5<br>OS=Homo sapiens<br>GN=PLK5 PE=1 SV=4 - [PLK5_HUMAN]                 | 8.33  | 1 | 1 | 1 | 2  | 0.676 | 1.081 | 1.338 | 0.721 | 0.00  | 8.33  | 1 | 2  | 336  | 36.3  | 6.47 |
| Q8NDA8 | Maestro heat-like repeat-containing protein family member 1<br>OS=Homo sapiens<br>GN=MROH1 PE=2 SV=3 - [MROH1_HUMAN] | 0.85  | 1 | 2 | 2 | 2  | 0.918 | 0.917 | 0.988 | 0.722 | 2.44  | 0.85  | 2 | 2  | 1641 | 181.1 | 6.89 |
| Q8TC20 | Cancer-associated gene 1 protein<br>OS=Homo sapiens<br>GN=CAGE1 PE=1 SV=2 - [CAGE1_HUMAN]                            | 1.80  | 1 | 1 | 1 | 1  | 1.053 | 0.778 | 1.266 | 0.722 | 0.00  | 1.80  | 1 | 1  | 777  | 90.2  | 5.29 |
| O60447 | Ecotropic viral integration site 5 protein homolog<br>OS=Homo sapiens<br>GN=EVI5 PE=1 SV=3 - [EVI5_HUMAN]            | 6.54  | 1 | 6 | 6 | 14 | 0.988 | 0.854 | 1.030 | 0.722 | 30.46 | 6.54  | 8 | 14 | 810  | 92.9  | 6.10 |
| Q7RTR2 | Protein NLRC3<br>OS=Homo sapiens<br>GN=NLRC3 PE=2 SV=2 - [NLRC3_HUMAN]                                               | 0.66  | 1 | 1 | 1 | 1  | 1.220 | 1.126 | 0.944 | 0.722 | 2.39  | 0.66  | 1 | 1  | 1065 | 114.6 | 8.29 |
| P51788 | Chloride channel protein 2<br>OS=Homo sapiens<br>GN=CLCN2 PE=1 SV=2 - [CLCN2_HUMAN]                                  | 3.90  | 1 | 3 | 3 | 7  | 0.551 | 1.042 | 1.433 | 0.722 | 15.82 | 3.90  | 3 | 7  | 898  | 98.5  | 8.38 |
| Q12893 | Transmembrane protein 115<br>OS=Homo sapiens<br>GN=TMEM115 PE=1 SV=1 - [TM115_HUMAN]                                 | 11.11 | 1 | 2 | 3 | 6  | 1.099 | 1.319 | 1.612 | 0.722 | 21.33 | 11.11 | 3 | 6  | 351  | 38.2  | 8.16 |
| Q9UJ42 | Probable G-protein coupled receptor 160<br>OS=Homo sapiens<br>GN=GPR160 PE=2 SV=1 - [GP160_HUMAN]                    | 3.25  | 1 | 1 | 1 | 1  | 0.896 | 1.347 | 1.200 | 0.722 | 2.38  | 3.25  | 1 | 1  | 338  | 39.8  | 8.51 |

|        |                                                                                                                      |       |   |   |   |    |       |       |       |       |        |       |    |    |     |      |      |
|--------|----------------------------------------------------------------------------------------------------------------------|-------|---|---|---|----|-------|-------|-------|-------|--------|-------|----|----|-----|------|------|
| O60331 | Phosphatidylinositol 4-phosphate 5-kinase type-1 gamma<br>OS=Homo sapiens<br>GN=PIP5K1C<br>PE=1 SV=2 - [PI51C_HUMAN] | 6.89  | 1 | 3 | 3 | 5  | 0.751 | 1.004 | 1.104 | 0.722 | 12.28  | 6.89  | 5  | 5  | 668 | 73.2 | 5.29 |
| O43301 | Heat shock 70 kDa protein 12A OS=Homo sapiens<br>GN=HSPA12A<br>PE=1 SV=2 - [HS12A_HUMAN]                             | 10.52 | 1 | 6 | 6 | 15 | 0.837 | 1.472 | 1.520 | 0.722 | 30.77  | 10.52 | 11 | 15 | 675 | 74.9 | 6.77 |
| Q9ULC8 | Probable palmitoyltransferase ZDHHC8<br>OS=Homo sapiens<br>GN=ZDHHC8<br>PE=1 SV=3 - [ZDHC8_HUMAN]                    | 7.97  | 1 | 3 | 3 | 4  | 1.227 | 1.086 | 0.889 | 0.723 | 10.29  | 7.97  | 3  | 4  | 765 | 81.4 | 9.17 |
| Q12983 | BCL2/adenovirus E1B 19 kDa protein-interacting protein 3<br>OS=Homo sapiens<br>GN=BNIP3<br>PE=1 SV=2 - [BNIP3_HUMAN] | 5.67  | 1 | 1 | 1 | 4  | 1.203 | 1.279 | 1.193 | 0.723 | 10.21  | 5.67  | 2  | 4  | 194 | 21.5 | 6.80 |
| Q13433 | Zinc transporter ZIP6<br>OS=Homo sapiens<br>GN=SLC39A6<br>PE=1 SV=3 - [S39A6_HUMAN]                                  | 1.19  | 1 | 1 | 1 | 2  | 0.670 | 1.160 | 0.722 | 0.723 | 1.80   | 1.19  | 2  | 2  | 755 | 85.0 | 6.95 |
| P46736 | Lys-63-specific deubiquitinase BRCC36<br>OS=Homo sapiens<br>GN=BRCC3<br>PE=1 SV=2 - [BRCC3_HUMAN]                    | 15.19 | 1 | 4 | 4 | 11 | 0.891 | 0.917 | 0.737 | 0.723 | 30.34  | 15.19 | 6  | 11 | 316 | 36.0 | 5.92 |
| Q9P0K9 | DOMON domain-containing protein FRRS1L<br>OS=Homo sapiens<br>GN=FRRS1L<br>PE=2 SV=2 - [FRS1L_HUMAN]                  | 10.76 | 1 | 1 | 1 | 1  | 1.616 | 1.674 | 0.942 | 0.723 | 2.71   | 10.76 | 1  | 1  | 344 | 37.2 | 7.62 |
| P13987 | CD59 glycoprotein<br>OS=Homo sapiens<br>GN=CD59<br>PE=1 SV=1 - [CD59_HUMAN]                                          | 25.00 | 1 | 4 | 4 | 62 | 0.801 | 0.771 | 0.723 | 0.723 | 174.71 | 25.00 | 7  | 62 | 128 | 14.2 | 6.48 |

|        |                                                                                                                       |       |   |    |    |     |       |       |       |       |         |       |     |     |      |       |      |
|--------|-----------------------------------------------------------------------------------------------------------------------|-------|---|----|----|-----|-------|-------|-------|-------|---------|-------|-----|-----|------|-------|------|
| Q6P4A8 | Phospholipase B-like 1<br>OS=Homo sapiens<br>GN=PLBD1<br>PE=1 SV=2 - [PLBL1_HUMAN]                                    | 4.16  | 1 | 1  | 1  | 1   | 0.329 | 3.239 | 1.475 | 0.723 | 0.00    | 4.16  | 1   | 1   | 553  | 63.2  | 9.06 |
| P56199 | Integrin alpha-1 OS=Homo sapiens<br>GN=ITGA1<br>PE=1 SV=2 - [ITA1_HUMAN]                                              | 22.22 | 1 | 28 | 29 | 122 | 0.938 | 0.452 | 0.990 | 0.724 | 265.34  | 22.22 | 49  | 122 | 1179 | 130.8 | 6.29 |
| Q9H943 | Uncharacterized protein C10orf68 OS=Homo sapiens<br>GN=C10orf68<br>PE=2 SV=2 - [C1068_HUMAN]                          | 2.87  | 1 | 1  | 2  | 3   | 0.504 | 1.060 | 1.476 | 0.724 | 0.00    | 2.87  | 2   | 3   | 628  | 71.5  | 9.35 |
| O00716 | Transcription factor E2F3 OS=Homo sapiens<br>GN=E2F3<br>PE=1 SV=1 - [E2F3_HUMAN]                                      | 4.95  | 1 | 2  | 2  | 2   | 0.512 | 1.320 | 0.610 | 0.724 | 5.28    | 4.95  | 2   | 2   | 465  | 49.1  | 5.44 |
| Q96SL1 | Disrupted in renal carcinoma protein 2 OS=Homo sapiens<br>GN=DIRC2<br>PE=1 SV=1 - [DIRC2_HUMAN]                       | 6.28  | 1 | 2  | 2  | 7   | 0.915 | 0.869 | 0.783 | 0.724 | 11.39   | 6.28  | 3   | 7   | 478  | 52.1  | 8.47 |
| Q9BTT0 | Adic leucine-rich nuclear phosphoprotein 32 family member E OS=Homo sapiens<br>GN=ANP32E<br>PE=1 SV=1 - [AN32E_HUMAN] | 20.90 | 1 | 4  | 5  | 7   | 0.690 | 0.900 | 0.821 | 0.724 | 19.77   | 20.90 | 5   | 7   | 268  | 30.7  | 3.85 |
| P07814 | Bifunctional glutamate/proline--tRNA ligase OS=Homo sapiens<br>GN=EPRS<br>PE=1 SV=5 - [SYEP_HUMAN]                    | 46.56 | 2 | 66 | 67 | 446 | 0.705 | 0.834 | 0.822 | 0.724 | 1083.23 | 46.56 | 111 | 446 | 1512 | 170.5 | 7.33 |
| P20061 | Transcobalamin-1 OS=Homo sapiens<br>GN=TCN1<br>PE=1 SV=2 - [TCO1_HUMAN]                                               | 1.62  | 1 | 1  | 1  | 2   | 0.744 | 0.687 | 0.580 | 0.725 | 4.14    | 1.62  | 1   | 2   | 433  | 48.2  | 5.03 |
| P02549 | Spectrin alpha chain, erythrocytic 1 OS=Homo sapiens<br>GN=SPTA1<br>PE=1 SV=5 - [SPTA1_HUMAN]                         | 1.74  | 1 | 2  | 5  | 12  | 1.365 | 0.310 | 0.224 | 0.725 | 22.17   | 1.74  | 6   | 12  | 2419 | 279.8 | 5.05 |

|        |                                                                                                                 |       |   |    |    |     |       |       |       |       |        |       |    |     |      |       |      |
|--------|-----------------------------------------------------------------------------------------------------------------|-------|---|----|----|-----|-------|-------|-------|-------|--------|-------|----|-----|------|-------|------|
| P11532 | Dystrophin<br>OS=Homo sapiens<br>GN=DMD PE=1 SV=3 -<br>[DMD_HUMAN]                                              | 5.51  | 1 | 14 | 19 | 29  | 0.894 | 1.835 | 2.185 | 0.725 | 56.03  | 5.51  | 24 | 29  | 3685 | 426.5 | 5.88 |
| Q16643 | Drebrin<br>OS=Homo sapiens<br>GN= DBN1<br>PE=1 SV=4 -<br>[DREB_HUMAN]                                           | 40.68 | 1 | 23 | 23 | 237 | 0.792 | 0.914 | 1.108 | 0.726 | 698.35 | 40.68 | 37 | 237 | 649  | 71.4  | 4.45 |
| Q9C0F0 | Putative Polycomb group protein ASXL3<br>OS=Homo sapiens<br>GN=ASXL3<br>PE=2 SV=3 -<br>[ASXL3_HUMAN]            | 0.80  | 1 | 1  | 2  | 3   | 1.344 | 0.699 | 1.162 | 0.726 | 6.45   | 0.80  | 3  | 3   | 2248 | 241.8 | 6.14 |
| Q9NUE0 | Palmitoyltransferase ZDHHC18<br>OS=Homo sapiens<br>GN=ZDHHC18<br>PE=2 SV=2 -<br>[ZDH18_HUMAN]                   | 3.61  | 1 | 1  | 1  | 2   | 1.152 | 1.025 | 0.685 | 0.726 | 3.83   | 3.61  | 2  | 2   | 388  | 42.0  | 9.04 |
| Q4ZHG4 | Fibronectin type III domain-containing protein 1<br>OS=Homo sapiens<br>GN=FNDC1<br>PE=1 SV=4 -<br>[FNDC1_HUMAN] | 2.59  | 1 | 2  | 2  | 2   | 0.338 | 0.733 | 0.680 | 0.726 | 4.34   | 2.59  | 2  | 2   | 1894 | 205.4 | 9.32 |
| Q9NUP9 | Protein lin-7 homolog C<br>OS=Homo sapiens<br>GN=LIN7C<br>PE=1 SV=1 -<br>[LIN7C_HUMAN]                          | 70.05 | 2 | 6  | 13 | 35  | 1.197 | 0.904 | 0.958 | 0.726 | 83.58  | 70.05 | 18 | 35  | 197  | 21.8  | 8.43 |
| Q8IY22 | C-Maf-inducing protein<br>OS=Homo sapiens<br>GN=CMIP<br>PE=1 SV=3 -<br>[CMIP_HUMAN]                             | 2.85  | 1 | 2  | 2  | 2   | 0.549 | 0.556 | 0.785 | 0.726 | 2.34   | 2.85  | 2  | 2   | 773  | 86.3  | 6.70 |
| Q96GD3 | Polycomb protein SCMH1<br>OS=Homo sapiens<br>GN=SCMH1<br>PE=1 SV=1 -<br>[SCMH1_HUMAN]                           | 1.36  | 1 | 1  | 1  | 1   | 0.541 | 0.600 | 0.672 | 0.726 | 2.22   | 1.36  | 1  | 1   | 660  | 73.3  | 9.25 |
| Q8NCG7 | Sn1-specific diacylglycerol lipase beta<br>OS=Homo sapiens<br>GN=DAGLB<br>PE=1 SV=2 -<br>[DGLB_HUMAN]           | 2.53  | 1 | 2  | 2  | 3   | 0.726 | 0.645 | 0.692 | 0.726 | 0.00   | 2.53  | 3  | 3   | 672  | 73.7  | 6.55 |

|        |                                                                                                              |       |   |    |    |     |       |       |       |       |        |       |    |     |      |       |      |
|--------|--------------------------------------------------------------------------------------------------------------|-------|---|----|----|-----|-------|-------|-------|-------|--------|-------|----|-----|------|-------|------|
| O75436 | Vacuolar protein sorting-associated protein 26A<br>OS=Homo sapiens<br>GN=VPS26A<br>PE=1 SV=2 - [VP26A_HUMAN] | 38.84 | 1 | 12 | 13 | 26  | 1.080 | 0.914 | 0.858 | 0.726 | 54.54  | 38.84 | 18 | 26  | 327  | 38.1  | 6.57 |
| P50552 | Vasodilator-stimulated phosphoprotein OS=Homo sapiens<br>GN=VASP<br>PE=1 SV=3 - [VASP_HUMAN]                 | 37.89 | 1 | 15 | 15 | 177 | 0.854 | 1.138 | 1.599 | 0.726 | 386.40 | 37.89 | 27 | 177 | 380  | 39.8  | 8.94 |
| O15061 | Synemin<br>OS=Homo sapiens<br>GN=SYNM<br>PE=1 SV=2 - [SYNEM_HUMAN]                                           | 31.69 | 1 | 43 | 43 | 133 | 1.006 | 3.910 | 2.767 | 0.727 | 355.34 | 31.69 | 65 | 133 | 1565 | 172.7 | 5.16 |
| P15151 | Poliovirus receptor<br>OS=Homo sapiens<br>GN=PVR PE=1 SV=2 - [PVR_HUMAN]                                     | 17.03 | 1 | 6  | 6  | 39  | 1.728 | 0.560 | 0.932 | 0.727 | 86.52  | 17.03 | 12 | 39  | 417  | 45.3  | 6.52 |
| Q96C36 | Pyrraline-5-carboxylate reductase 2<br>OS=Homo sapiens<br>GN=PYCR2<br>PE=1 SV=1 - [P5CR2_HUMAN]              | 20.63 | 1 | 7  | 8  | 23  | 0.589 | 0.840 | 0.912 | 0.727 | 51.81  | 20.63 | 11 | 23  | 320  | 33.6  | 7.77 |
| Q6W2J9 | BCL-6 corepressor<br>OS=Homo sapiens<br>GN=BCOR<br>PE=1 SV=1 - [BCOR_HUMAN]                                  | 1.54  | 1 | 2  | 2  | 5   | 0.946 | 0.844 | 0.957 | 0.727 | 8.97   | 1.54  | 2  | 5   | 1755 | 192.1 | 6.48 |
| P15586 | N-acetylglucosamine-6-sulfatase<br>OS=Homo sapiens<br>GN=GNS PE=1 SV=3 - [GNS_HUMAN]                         | 23.19 | 1 | 12 | 12 | 49  | 0.756 | 1.315 | 1.109 | 0.728 | 79.08  | 23.19 | 19 | 49  | 552  | 62.0  | 8.31 |
| Q9UNH6 | Sorting nexin-7<br>OS=Homo sapiens<br>GN=SNX7<br>PE=1 SV=1 - [SNX7_HUMAN]                                    | 10.08 | 1 | 5  | 5  | 14  | 0.971 | 0.979 | 0.955 | 0.728 | 26.90  | 10.08 | 7  | 14  | 387  | 45.3  | 5.11 |
| O60716 | Catenin delta-1<br>OS=Homo sapiens<br>GN=CTNND1<br>PE=1 SV=1 - [CTND1_HUMAN]                                 | 36.26 | 1 | 32 | 32 | 191 | 1.201 | 1.022 | 1.250 | 0.728 | 375.47 | 36.26 | 55 | 191 | 968  | 108.1 | 6.23 |
| Q6ZU65 | Ubiquitin-2<br>OS=Homo sapiens<br>GN=UBN2<br>PE=1 SV=2 - [UBN2_HUMAN]                                        | 3.04  | 1 | 3  | 3  | 6   | 0.591 | 2.160 | 3.290 | 0.728 | 1.81   | 3.04  | 3  | 6   | 1347 | 146.0 | 9.19 |

|        |                                                                                                              |       |   |    |    |     |       |       |       |       |        |       |    |     |      |       |      |
|--------|--------------------------------------------------------------------------------------------------------------|-------|---|----|----|-----|-------|-------|-------|-------|--------|-------|----|-----|------|-------|------|
| Q9NX47 | E3 ubiquitin-protein ligase<br>MARCH5<br>OS=Homo sapiens<br>GN=MARCH5<br>PE=1 SV=1 - [MARH5_HUMAN]           | 10.79 | 1 | 2  | 2  | 4   | 0.899 | 0.721 | 0.878 | 0.728 | 4.36   | 10.79 | 3  | 4   | 278  | 31.2  | 8.70 |
| P12074 | Cytochrome c oxidase subunit 6A1, mitochondrial<br>OS=Homo sapiens<br>GN=COX6A1<br>PE=1 SV=4 - [CX6A1_HUMAN] | 43.12 | 1 | 2  | 2  | 6   | 0.804 | 0.936 | 0.784 | 0.728 | 13.29  | 43.12 | 3  | 6   | 109  | 12.1  | 9.32 |
| Q5VT06 | Centrosome-associated protein 350<br>OS=Homo sapiens<br>GN=CEP350<br>PE=1 SV=1 - [CE350_HUMAN]               | 0.19  | 1 | 1  | 1  | 1   | 0.139 | 0.596 | 1.086 | 0.728 | 2.14   | 0.19  | 1  | 1   | 3117 | 350.7 | 6.33 |
| Q8N999 | Uncharacterized protein C12orf29<br>OS=Homo sapiens<br>GN=C12orf29<br>PE=1 SV=2 - [CL029_HUMAN]              | 6.46  | 1 | 2  | 2  | 4   | 0.668 | 0.849 | 0.865 | 0.728 | 11.22  | 6.46  | 3  | 4   | 325  | 37.5  | 7.06 |
| Q9Y2N7 | Hypoxia-inducible factor 3-alpha<br>OS=Homo sapiens<br>GN=HIF3A<br>PE=1 SV=2 - [HIF3A_HUMAN]                 | 4.78  | 1 | 2  | 2  | 2   | 1.125 | 0.997 | 0.856 | 0.729 | 4.96   | 4.78  | 2  | 2   | 669  | 72.4  | 6.02 |
| Q9NZK5 | Adenosine deaminase CECR1<br>OS=Homo sapiens<br>GN=CECR1<br>PE=1 SV=2 - [CECR1_HUMAN]                        | 7.83  | 1 | 2  | 2  | 2   | 0.912 | 0.922 | 0.856 | 0.729 | 2.59   | 7.83  | 2  | 2   | 511  | 58.9  | 7.91 |
| Q95302 | Peptidyl-prolyl isomerase FKBP9<br>OS=Homo sapiens<br>GN=FKBP9<br>PE=1 SV=2 - [FKBP9_HUMAN]                  | 33.33 | 2 | 21 | 22 | 149 | 0.925 | 0.763 | 0.848 | 0.729 | 332.71 | 33.33 | 38 | 149 | 570  | 63.0  | 5.08 |
| Q9ULP9 | TBC1 domain family member 24<br>OS=Homo sapiens<br>GN=TBC1D24<br>PE=1 SV=2 - [TBC24_HUMAN]                   | 11.45 | 1 | 6  | 6  | 24  | 0.985 | 0.694 | 0.962 | 0.729 | 60.70  | 11.45 | 11 | 24  | 559  | 62.9  | 7.36 |
| Q9Y5X2 | Sorting nexin-8<br>OS=Homo sapiens<br>GN=SNX8<br>PE=1 SV=1 - [SNX8_HUMAN]                                    | 5.81  | 1 | 2  | 2  | 7   | 0.440 | 4.164 | 0.987 | 0.729 | 3.28   | 5.81  | 2  | 7   | 465  | 52.5  | 7.39 |

|        |                                                                                                           |       |   |   |   |    |       |       |       |       |        |       |    |    |      |       |      |
|--------|-----------------------------------------------------------------------------------------------------------|-------|---|---|---|----|-------|-------|-------|-------|--------|-------|----|----|------|-------|------|
| Q8N2C7 | Protein unc-80 homolog<br>OS=Homo sapiens<br>GN=UNC80<br>PE=2 SV=2 - [UNC80_HUMAN]                        | 0.28  | 1 | 1 | 1 | 1  | 0.536 | 0.235 | 0.403 | 0.730 | 2.07   | 0.28  | 1  | 1  | 3258 | 363.2 | 6.86 |
| P07864 | L-lactate dehydrogenase C chain<br>OS=Homo sapiens<br>GN=LDHC PE=1 SV=4 - [LDHC_HUMAN]                    | 5.72  | 1 | 1 | 2 | 65 | 1.209 | 1.911 | 1.490 | 0.730 | 136.30 | 5.72  | 3  | 65 | 332  | 36.3  | 7.46 |
| Q00536 | Cyclin-dependent kinase 16<br>OS=Homo sapiens<br>GN=CDK16<br>PE=1 SV=1 - [CDK16_HUMAN]                    | 13.10 | 6 | 4 | 7 | 18 | 0.948 | 1.100 | 0.885 | 0.730 | 38.52  | 13.10 | 9  | 18 | 496  | 55.7  | 7.62 |
| P31629 | Transcription factor HIVEP2<br>OS=Homo sapiens<br>GN=HIVEP2<br>PE=1 SV=2 - [ZEP2_HUMAN]                   | 0.65  | 1 | 1 | 1 | 1  | 1.276 | 0.876 | 1.333 | 0.730 | 2.36   | 0.65  | 1  | 1  | 2446 | 268.9 | 6.96 |
| Q96QE3 | ATPase family AAA domain-containing protein 5<br>OS=Homo sapiens<br>GN=ATAD5<br>PE=1 SV=4 - [ATAD5_HUMAN] | 0.98  | 1 | 2 | 2 | 2  | 0.609 | 1.165 | 0.660 | 0.731 | 0.00   | 0.98  | 2  | 2  | 1844 | 207.4 | 9.19 |
| O00408 | cGMP-dependent 3',5'-cyclic phosphodiesterase<br>OS=Homo sapiens<br>GN=PDE2A<br>PE=1 SV=1 - [PDE2A_HUMAN] | 0.64  | 1 | 1 | 1 | 1  | 0.631 | 0.746 | 0.697 | 0.731 | 1.96   | 0.64  | 1  | 1  | 941  | 105.6 | 5.41 |
| P58005 | Sestrin-3<br>OS=Homo sapiens<br>GN=SESN3<br>PE=2 SV=2 - [SESN3_HUMAN]                                     | 6.30  | 1 | 3 | 3 | 7  | 0.924 | 0.690 | 1.110 | 0.731 | 16.06  | 6.30  | 5  | 7  | 492  | 57.3  | 6.25 |
| Q96A73 | Putative monooxygenase p33MONOX<br>OS=Homo sapiens<br>GN=KIAA1191<br>PE=1 SV=1 - [P33MX_HUMAN]            | 16.07 | 1 | 5 | 5 | 12 | 1.044 | 1.455 | 1.154 | 0.731 | 23.45  | 16.07 | 8  | 12 | 305  | 33.2  | 9.39 |
| Q9Y639 | Neuroplastin<br>OS=Homo sapiens<br>GN=NPTN<br>PE=1 SV=2 - [NPTN_HUMAN]                                    | 18.59 | 1 | 7 | 7 | 51 | 1.043 | 1.193 | 1.194 | 0.731 | 115.80 | 18.59 | 13 | 51 | 398  | 44.4  | 7.99 |

|        |                                                                                                                |       |   |    |    |     |       |       |       |       |        |       |    |     |      |       |       |
|--------|----------------------------------------------------------------------------------------------------------------|-------|---|----|----|-----|-------|-------|-------|-------|--------|-------|----|-----|------|-------|-------|
| Q96GE4 | Centrosomal protein of 95 kDa OS=Homo sapiens<br>GN=CEP95<br>PE=1 SV=1 - [CEP95_HUMAN]                         | 1.22  | 1 | 1  | 1  | 1   | 0.698 | 0.792 | 1.032 | 0.731 | 0.00   | 1.22  | 1  | 1   | 821  | 95.2  | 8.59  |
| P12429 | Annexin A3 OS=Homo sapiens<br>GN=ANXA3<br>PE=1 SV=3 - [ANXA3_HUMAN]                                            | 41.80 | 1 | 13 | 15 | 41  | 0.585 | 6.231 | 1.324 | 0.731 | 110.46 | 41.80 | 20 | 41  | 323  | 36.4  | 5.92  |
| Q16690 | Dual specificity protein phosphatase 5 OS=Homo sapiens<br>GN=DUSP5<br>PE=1 SV=2 - [DUS5_HUMAN]                 | 5.21  | 1 | 1  | 1  | 1   | 1.236 | 1.734 | 0.937 | 0.732 | 0.00   | 5.21  | 1  | 1   | 384  | 42.0  | 8.35  |
| P20042 | Eukaryotic translation initiation factor 2 subunit 2 OS=Homo sapiens<br>GN=EIF2S2<br>PE=1 SV=2 - [IF2B_HUMAN]  | 42.04 | 1 | 15 | 15 | 110 | 0.859 | 0.853 | 0.854 | 0.732 | 287.02 | 42.04 | 25 | 110 | 333  | 38.4  | 5.80  |
| Q9HCR9 | Dual 3',5'-cyclic-AMP and -GMP phosphodiesterase 11A OS=Homo sapiens<br>GN=PDE11A<br>PE=1 SV=2 - [PDE11_HUMAN] | 2.79  | 1 | 2  | 2  | 2   | 0.730 | 0.915 | 0.858 | 0.732 | 2.77   | 2.79  | 2  | 2   | 933  | 104.7 | 6.60  |
| Q9P0J6 | 39S ribosomal protein L36, mitochondrial OS=Homo sapiens<br>GN=MRPL36<br>PE=1 SV=1 - [RM36_HUMAN]              | 5.83  | 1 | 1  | 1  | 1   | 0.742 | 0.552 | 0.637 | 0.732 | 2.28   | 5.83  | 1  | 1   | 103  | 11.8  | 11.27 |
| Q96RL7 | Vacuolar protein sorting-associated protein 13A OS=Homo sapiens<br>GN=VPS13A<br>PE=1 SV=2 - [VP13A_HUMAN]      | 1.48  | 1 | 3  | 4  | 6   | 0.854 | 1.350 | 1.091 | 0.732 | 8.89   | 1.48  | 5  | 6   | 3174 | 360.0 | 6.33  |
| P20930 | Filaggrin OS=Homo sapiens<br>GN=FLG PE=1 SV=3 - [FILA_HUMAN]                                                   | 0.34  | 1 | 2  | 2  | 3   | 1.171 | 1.027 | 0.577 | 0.732 | 7.57   | 0.34  | 2  | 3   | 4061 | 434.9 | 9.25  |
| Q13308 | Inactive tyrosine-protein kinase 7 OS=Homo sapiens<br>GN=PTK7<br>PE=1 SV=2 - [PTK7_HUMAN]                      | 27.85 | 1 | 24 | 24 | 79  | 1.032 | 0.753 | 0.651 | 0.732 | 212.44 | 27.85 | 35 | 79  | 1070 | 118.3 | 7.09  |



|        |                                                                                                                                                        |       |   |     |     |      |       |       |       |       |        |       |     |      |      |       |      |
|--------|--------------------------------------------------------------------------------------------------------------------------------------------------------|-------|---|-----|-----|------|-------|-------|-------|-------|--------|-------|-----|------|------|-------|------|
| Q14558 | Phosphoribosyl<br>pyrophosphate<br>synthase-<br>associated<br>protein 1<br>OS=Homo<br>sapiens<br>GN=PRPSAP1<br>PE=1 SV=2 -<br>[KPRA_HUMAN]             | 38.48 | 1 | 8   | 11  | 35   | 0.576 | 0.885 | 0.742 | 0.733 | 114.65 | 38.48 | 18  | 35   | 356  | 39.4  | 7.20 |
| P21333 | Filamin-A<br>OS=Homo<br>sapiens<br>GN=FLNA PE=1<br>SV=4 -<br>[FLNA_HUMAN]                                                                              | 69.81 | 1 | 159 | 178 | 5362 | 0.946 | 1.021 | 1.351 | 0.733 | #####  | 69.81 | 305 | 5362 | 2647 | 280.6 | 6.06 |
| Q8TAX9 | Gasdermin-B<br>OS=Homo<br>sapiens<br>GN=GSDMB<br>PE=1 SV=2 -<br>[GSDMB_HUMAN]                                                                          | 4.62  | 1 | 2   | 2   | 2    | 1.118 | 0.886 | 1.524 | 0.733 | 0.00   | 4.62  | 2   | 2    | 411  | 46.8  | 5.26 |
| Q09MP3 | RAD51-<br>associated<br>protein 2<br>OS=Homo<br>sapiens<br>GN=RAD51AP2<br>PE=1 SV=1 -<br>[RS1A2_HUMAN]                                                 | 0.86  | 1 | 1   | 1   | 1    | 0.573 | 0.861 | 1.022 | 0.733 | 1.82   | 0.86  | 1   | 1    | 1159 | 133.8 | 7.34 |
| P59510 | A disintegrin<br>and<br>metalloprotein<br>ase with<br>thrombospondin<br>motifs 20<br>OS=Homo<br>sapiens<br>GN=ADAMTS20<br>PE=2 SV=2 -<br>[ATS20_HUMAN] | 0.63  | 1 | 1   | 1   | 2    | 0.959 | 0.219 | 0.738 | 0.733 | 0.00   | 0.63  | 1   | 2    | 1910 | 214.6 | 7.21 |
| P62879 | Guanine<br>nucleotide-<br>binding protein<br>G(I)/G(S)/G(T)<br>subunit beta-2<br>OS=Homo<br>sapiens<br>GN=GNB2<br>PE=1 SV=3 -<br>[GBB2_HUMAN]          | 29.41 | 1 | 4   | 8   | 44   | 0.881 | 0.705 | 0.682 | 0.733 | 116.98 | 29.41 | 13  | 44   | 340  | 37.3  | 6.00 |
| Q8IVH8 | Mitogen-<br>activated<br>protein kinase<br>kinase kinase<br>kinase 3<br>OS=Homo<br>sapiens<br>GN=MAP4K3<br>PE=1 SV=1 -<br>[M4K3_HUMAN]                 | 5.48  | 1 | 4   | 4   | 11   | 0.892 | 0.913 | 0.848 | 0.734 | 30.74  | 5.48  | 5   | 11   | 894  | 101.3 | 7.56 |
| Q9NW68 | BSD domain-<br>containing<br>protein 1<br>OS=Homo<br>sapiens<br>GN=BSDC1<br>PE=1 SV=1 -<br>[BSDC1_HUMAN]                                               | 11.40 | 1 | 4   | 4   | 16   | 0.849 | 0.984 | 0.993 | 0.734 | 41.42  | 11.40 | 7   | 16   | 430  | 47.1  | 4.49 |

|        |                                                                                                                                                                                                                                                                                                                                                                                                                                                                                                                                                                                                                                                                                                                                                                                                                                                                                             |       |   |    |    |    |       |       |       |       |        |       |    |    |     |      |       |
|--------|---------------------------------------------------------------------------------------------------------------------------------------------------------------------------------------------------------------------------------------------------------------------------------------------------------------------------------------------------------------------------------------------------------------------------------------------------------------------------------------------------------------------------------------------------------------------------------------------------------------------------------------------------------------------------------------------------------------------------------------------------------------------------------------------------------------------------------------------------------------------------------------------|-------|---|----|----|----|-------|-------|-------|-------|--------|-------|----|----|-----|------|-------|
| Q9P0U1 | Mitochondrial import receptor subunit TOM7 homolog<br>OS=Homo sapiens<br>GN=TOMM7<br>PE=1 SV=1 - [TOM7_HUMAN<br>DPY30 domain-containing protein 1<br>OS=Homo sapiens<br>GN=DYDC1<br>PE=1 SV=1 - [DYDC1_HUMAN ]<br>PX domain-containing protein 1<br>OS=Homo sapiens<br>GN=PXDC1<br>PE=2 SV=3 - [PXDC1_HUMAN ]<br>Catenin beta-1<br>OS=Homo sapiens<br>GN=CTNFB1<br>PE=1 SV=1 - [CTNFB1_HUMAN ]<br>Src kinase-associated phosphoprotein 2<br>OS=Homo sapiens<br>GN=SKAP2<br>PE=1 SV=1 - [SKAP2_HUMAN ]<br>Down syndrome critical region protein 4<br>OS=Homo sapiens<br>GN=DSCR4<br>PE=2 SV=1 - [DSCR4_HUMAN ]<br>Numb-like protein<br>OS=Homo sapiens<br>GN=NUMBL<br>PE=1 SV=1 - [NUMBL_HUMAN ]<br>Protein arginine N-methyltransferase 3<br>OS=Homo sapiens<br>GN=PRMT3<br>PE=1 SV=3 - [ANM3_HUMAN]<br>Importin subunit alpha-4<br>OS=Homo sapiens<br>GN=KPNA3<br>PE=1 SV=2 - [IMA4_HUMAN] | 54.55 | 1 | 3  | 3  | 8  | 0.814 | 0.782 | 0.588 | 0.734 | 15.04  | 54.55 | 4  | 8  | 55  | 6.2  | 10.29 |
| Q8WWB3 |                                                                                                                                                                                                                                                                                                                                                                                                                                                                                                                                                                                                                                                                                                                                                                                                                                                                                             | 3.95  | 1 | 1  | 1  | 1  |       | 0.992 | 0.836 | 0.734 | 2.30   | 3.95  | 1  | 1  | 177 | 20.9 | 4.67  |
| Q5TGL8 |                                                                                                                                                                                                                                                                                                                                                                                                                                                                                                                                                                                                                                                                                                                                                                                                                                                                                             | 4.33  | 1 | 1  | 1  | 3  | 0.561 | 0.716 | 0.664 | 0.734 | 5.08   | 4.33  | 2  | 3  | 231 | 26.5 | 5.03  |
| P35222 |                                                                                                                                                                                                                                                                                                                                                                                                                                                                                                                                                                                                                                                                                                                                                                                                                                                                                             | 27.66 | 1 | 15 | 18 | 94 | 0.943 | 1.056 | 0.995 | 0.734 | 234.45 | 27.66 | 29 | 94 | 781 | 85.4 | 5.86  |
| O75563 |                                                                                                                                                                                                                                                                                                                                                                                                                                                                                                                                                                                                                                                                                                                                                                                                                                                                                             | 1.67  | 1 | 1  | 1  | 1  | 1.144 | 0.716 | 0.569 | 0.734 | 2.22   | 1.67  | 1  | 1  | 359 | 41.2 | 4.69  |
| P56555 |                                                                                                                                                                                                                                                                                                                                                                                                                                                                                                                                                                                                                                                                                                                                                                                                                                                                                             | 8.47  | 1 | 1  | 1  | 3  | 0.666 | 1.283 | 1.048 | 0.734 | 0.00   | 8.47  | 1  | 3  | 118 | 12.9 | 7.91  |
| Q9Y6R0 |                                                                                                                                                                                                                                                                                                                                                                                                                                                                                                                                                                                                                                                                                                                                                                                                                                                                                             | 18.88 | 1 | 8  | 11 | 39 | 0.927 | 1.131 | 1.178 | 0.734 | 81.55  | 18.88 | 21 | 39 | 609 | 64.9 | 8.85  |
| O60678 |                                                                                                                                                                                                                                                                                                                                                                                                                                                                                                                                                                                                                                                                                                                                                                                                                                                                                             | 2.45  | 1 | 1  | 1  | 1  | 0.692 | 0.564 | 0.533 | 0.735 | 5.39   | 2.45  | 1  | 1  | 531 | 59.8 | 5.35  |
| O00505 |                                                                                                                                                                                                                                                                                                                                                                                                                                                                                                                                                                                                                                                                                                                                                                                                                                                                                             | 11.13 | 1 | 2  | 7  | 31 | 0.687 | 0.604 | 0.579 | 0.735 | 50.50  | 11.13 | 10 | 31 | 521 | 57.8 | 4.94  |

|        |                                                                                                           |       |   |    |    |     |       |       |       |       |        |       |    |     |      |       |      |
|--------|-----------------------------------------------------------------------------------------------------------|-------|---|----|----|-----|-------|-------|-------|-------|--------|-------|----|-----|------|-------|------|
| O43490 | Prominin-1<br>OS=Homo sapiens<br>GN=PROM1<br>PE=1 SV=1 - [PROM1_HUMAN]                                    | 1.73  | 1 | 1  | 1  | 2   | 1.094 | 1.070 | 1.241 | 0.735 | 4.17   | 1.73  | 1  | 2   | 865  | 97.1  | 7.27 |
| P0CJ78 | Zinc finger protein 865<br>OS=Homo sapiens<br>GN=ZNF865<br>PE=3 SV=1 - [ZNF865_HUMAN]                     | 0.94  | 1 | 1  | 1  | 1   | 1.139 | 1.044 | 1.659 | 0.735 | 0.00   | 0.94  | 1  | 1   | 1059 | 111.0 | 9.19 |
| Q6UVK1 | Chondroitin sulfate proteoglycan 4<br>OS=Homo sapiens<br>GN=CSPG4<br>PE=1 SV=2 - [CSPG4_HUMAN]            | 2.84  | 1 | 6  | 7  | 30  | 1.243 | 2.769 | 1.871 | 0.735 | 40.30  | 2.84  | 11 | 30  | 2322 | 250.4 | 5.47 |
| Q86VV8 | Rotatin<br>OS=Homo sapiens<br>GN=RTTN<br>PE=1 SV=3 - [RTTN_HUMAN]                                         | 0.72  | 1 | 1  | 2  | 2   | 1.352 | 0.522 | 0.772 | 0.735 | 2.28   | 0.72  | 2  | 2   | 2226 | 248.5 | 6.70 |
| Q92896 | Golgi apparatus protein 1<br>OS=Homo sapiens<br>GN=GLG1 PE=1 SV=2 - [GLG1_HUMAN]                          | 25.28 | 1 | 31 | 31 | 147 | 0.659 | 0.877 | 0.810 | 0.735 | 352.89 | 25.28 | 50 | 147 | 1179 | 134.5 | 6.90 |
| A6NIX2 | Wilms tumor protein 1-interacting protein<br>OS=Homo sapiens<br>GN=WTIP<br>PE=1 SV=3 - [WTIP_HUMAN]       | 5.81  | 1 | 2  | 2  | 2   | 1.158 | 1.796 | 1.823 | 0.735 | 2.29   | 5.81  | 2  | 2   | 430  | 45.1  | 8.12 |
| Q8TC21 | Zinc finger protein 596<br>OS=Homo sapiens<br>GN=ZNF596<br>PE=2 SV=2 - [ZNF596_HUMAN]                     | 2.38  | 1 | 1  | 1  | 2   | 1.168 | 1.166 | 0.536 | 0.735 | 0.00   | 2.38  | 1  | 2   | 504  | 58.5  | 8.92 |
| Q9UN81 | LINE-1 retrotransposable element ORF1 protein<br>OS=Homo sapiens<br>GN=L1RE1<br>PE=1 SV=1 - [LORF1_HUMAN] | 2.66  | 1 | 1  | 1  | 1   | 1.156 | 1.881 | 0.654 | 0.736 | 1.72   | 2.66  | 1  | 1   | 338  | 40.0  | 9.51 |
| A6ZKI3 | Protein FAM127A<br>OS=Homo sapiens<br>GN=FAM127A<br>PE=1 SV=1 - [F127A_HUMAN]                             | 15.04 | 3 | 2  | 2  | 2   | 0.741 | 0.846 | 0.757 | 0.736 | 4.85   | 15.04 | 2  | 2   | 113  | 13.2  | 5.07 |

|        |                                                                                                               |       |   |    |    |      |       |       |       |       |         |       |    |      |     |       |      |
|--------|---------------------------------------------------------------------------------------------------------------|-------|---|----|----|------|-------|-------|-------|-------|---------|-------|----|------|-----|-------|------|
| Q13404 | Ubiquitin-conjugating enzyme E2 variant 1<br>OS=Homo sapiens<br>GN=UBE2V1<br>PE=1 SV=2 - [UB2V1_HUMAN]        | 46.26 | 1 | 3  | 7  | 136  | 0.873 | 0.861 | 1.049 | 0.736 | 388.87  | 46.26 | 12 | 136  | 147 | 16.5  | 7.93 |
| O95081 | Arf-GAP domain and FG repeat-containing protein 2<br>OS=Homo sapiens<br>GN=AGFG2<br>PE=1 SV=2 - [AGFG2_HUMAN] | 6.86  | 1 | 3  | 3  | 3    | 0.635 | 0.772 | 1.096 | 0.736 | 5.45    | 6.86  | 3  | 3    | 481 | 48.9  | 9.11 |
| Q15208 | Serine/threonine-protein kinase 38<br>OS=Homo sapiens<br>GN=STK38<br>PE=1 SV=1 - [STK38_HUMAN]                | 13.12 | 1 | 5  | 5  | 19   | 1.065 | 0.903 | 1.238 | 0.736 | 68.84   | 13.12 | 10 | 19   | 465 | 54.2  | 7.15 |
| Q659A1 | Little elongation complex subunit 2<br>OS=Homo sapiens<br>GN=ICE2 PE=1 SV=2 - [ICE2_HUMAN]                    | 4.28  | 1 | 3  | 3  | 5    | 1.104 | 0.904 | 0.778 | 0.737 | 2.31    | 4.28  | 4  | 5    | 982 | 109.9 | 7.09 |
| Q16851 | UTP--glucose-1-phosphate uridylyltransferase<br>OS=Homo sapiens<br>GN=UGP2<br>PE=1 SV=5 - [UGPA_HUMAN]        | 49.21 | 1 | 27 | 27 | 117  | 0.841 | 1.141 | 0.996 | 0.737 | 255.23  | 49.21 | 43 | 117  | 508 | 56.9  | 8.15 |
| Q562R1 | Beta-actin-like protein 2<br>OS=Homo sapiens<br>GN=ACTBL2<br>PE=1 SV=2 - [ACTBL_HUMAN]                        | 45.74 | 1 | 8  | 20 | 2039 | 1.043 | 0.814 | 1.169 | 0.737 | 5603.95 | 45.74 | 32 | 2039 | 376 | 42.0  | 5.59 |
| P80404 | 4-aminobutyrate aminotransferase, mitochondrial<br>OS=Homo sapiens<br>GN=ABAT<br>PE=1 SV=3 - [GABT_HUMAN]     | 2.00  | 1 | 1  | 1  | 3    | 0.599 | 0.580 | 0.701 | 0.737 | 8.66    | 2.00  | 2  | 3    | 500 | 56.4  | 7.96 |
| P17174 | Aspartate aminotransferase, cytoplasmic<br>OS=Homo sapiens<br>GN=GOT1<br>PE=1 SV=3 - [AATC_HUMAN]             | 33.41 | 1 | 14 | 14 | 51   | 0.810 | 1.197 | 0.999 | 0.738 | 111.99  | 33.41 | 22 | 51   | 413 | 46.2  | 7.01 |

|        |                                                                                                                               |       |   |    |    |     |       |       |       |       |        |       |    |     |      |       |       |
|--------|-------------------------------------------------------------------------------------------------------------------------------|-------|---|----|----|-----|-------|-------|-------|-------|--------|-------|----|-----|------|-------|-------|
| Q9Y6I8 | Peroxisomal membrane protein 4<br>OS=Homo sapiens<br>GN=PXMP4<br>PE=1 SV=3 - [PXMP4_HUMAN]                                    | 3.77  | 1 | 1  | 1  | 1   | 1.055 | 0.646 | 0.727 | 0.738 | 2.01   | 3.77  | 1  | 1   | 212  | 24.2  | 10.07 |
| Q14194 | Dihydropyrimidinase-related protein 1<br>OS=Homo sapiens<br>GN=CRMP1<br>PE=1 SV=1 - [DPYL1_HUMAN]                             | 13.29 | 1 | 3  | 6  | 73  | 0.780 | 2.187 | 5.743 | 0.738 | 164.27 | 13.29 | 10 | 73  | 572  | 62.1  | 7.03  |
| Q9Y576 | Ankyrin repeat and SOCS box protein 1<br>OS=Homo sapiens<br>GN=ASB1<br>PE=1 SV=1 - [ASB1_HUMAN]                               | 2.69  | 1 | 1  | 1  | 3   | 0.680 | 0.691 | 0.873 | 0.738 | 4.41   | 2.69  | 2  | 3   | 335  | 37.0  | 8.21  |
| Q96PR1 | Potassium voltage-gated channel subfamily C member 2<br>OS=Homo sapiens<br>GN=KCNC2<br>PE=1 SV=1 - [KCNC2_HUMAN]              | 1.41  | 1 | 1  | 1  | 1   | 0.718 | 0.589 | 0.577 | 0.738 | 1.82   | 1.41  | 1  | 1   | 638  | 70.2  | 7.96  |
| Q0VDI3 | Transmembrane protein C5orf28<br>OS=Homo sapiens<br>GN=C5orf28<br>PE=2 SV=1 - [CE028_HUMAN]                                   | 6.51  | 1 | 1  | 1  | 1   | 0.451 | 0.709 | 0.938 | 0.738 | 0.00   | 6.51  | 1  | 1   | 215  | 24.2  | 8.59  |
| P30622 | CAP-Gly domain-containing linker protein 1<br>OS=Homo sapiens<br>GN=CLIP1<br>PE=1 SV=2 - [CLIP1_HUMAN]                        | 43.67 | 1 | 58 | 62 | 238 | 0.943 | 0.838 | 0.859 | 0.738 | 572.57 | 43.67 | 96 | 238 | 1438 | 162.1 | 5.36  |
| P11169 | Solute carrier family 2, facilitated glucose transporter member 3<br>OS=Homo sapiens<br>GN=SLC2A3<br>PE=1 SV=1 - [GTR3_HUMAN] | 1.41  | 2 | 1  | 1  | 2   | 0.839 | 0.868 | 0.746 | 0.739 | 2.18   | 1.41  | 1  | 2   | 496  | 53.9  | 7.20  |
| Q9Y696 | Chloride intracellular channel protein 4<br>OS=Homo sapiens<br>GN=CLIC4<br>PE=1 SV=4 - [CLIC4_HUMAN]                          | 75.49 | 3 | 19 | 20 | 171 | 0.747 | 0.965 | 1.017 | 0.739 | 429.90 | 75.49 | 32 | 171 | 253  | 28.8  | 5.59  |

|        |                                                                                                                             |       |   |    |    |     |       |       |       |       |        |       |    |     |      |       |      |
|--------|-----------------------------------------------------------------------------------------------------------------------------|-------|---|----|----|-----|-------|-------|-------|-------|--------|-------|----|-----|------|-------|------|
| P27986 | Phosphatidylinositol 3-kinase regulatory subunit alpha<br>OS=Homo sapiens<br>GN=PIK3R1<br>PE=1 SV=2 - [P85A_HUMAN]          | 13.26 | 2 | 8  | 10 | 24  | 0.663 | 0.947 | 1.043 | 0.739 | 50.62  | 13.26 | 16 | 24  | 724  | 83.5  | 6.16 |
| Q9BZA8 | Protocadherin-11 Y-linked<br>OS=Homo sapiens<br>GN=PCDH11Y<br>PE=1 SV=1 - [PC11Y_HUMAN]                                     | 0.67  | 2 | 1  | 1  | 1   | 0.635 | 0.718 | 0.331 | 0.739 | 1.83   | 0.67  | 1  | 1   | 1340 | 146.7 | 5.21 |
| Q07960 | Rho GTPase-activating protein 1<br>OS=Homo sapiens<br>GN=ARHGAP1<br>PE=1 SV=1 - [RHG01_HUMAN]                               | 50.57 | 1 | 20 | 20 | 173 | 0.726 | 1.032 | 1.234 | 0.739 | 482.85 | 50.57 | 34 | 173 | 439  | 50.4  | 6.29 |
| Q8IZS8 | Voltage-dependent calcium channel subunit alpha-2/delta-3<br>OS=Homo sapiens<br>GN=CACNA2D3<br>PE=1 SV=1 - [CA2D3_HUMAN]    | 2.11  | 1 | 2  | 2  | 3   | 1.000 | 1.101 | 1.043 | 0.739 | 6.79   | 2.11  | 2  | 3   | 1091 | 122.9 | 5.78 |
| P78363 | Retinal-specific ATP-binding cassette transporter<br>OS=Homo sapiens<br>GN=ABCA4<br>PE=1 SV=3 - [ABCA4_HUMAN]               | 0.31  | 1 | 1  | 1  | 2   | 0.807 | 0.289 | 0.439 | 0.739 | 4.85   | 0.31  | 1  | 2   | 2273 | 255.8 | 6.29 |
| Q8TCQ1 | E3 ubiquitin-protein ligase MARCH1<br>OS=Homo sapiens<br>GN=MARCH1<br>PE=1 SV=1 - [MARH1_HUMAN]                             | 2.08  | 2 | 1  | 1  | 1   | 0.724 | 0.458 | 0.896 | 0.739 | 0.00   | 2.08  | 1  | 1   | 289  | 32.3  | 8.37 |
| O75381 | Peroxisomal membrane protein PEX14<br>OS=Homo sapiens<br>GN=PEX14<br>PE=1 SV=1 - [PEX14_HUMAN]                              | 12.20 | 1 | 3  | 4  | 8   | 1.027 | 1.395 | 1.550 | 0.740 | 30.31  | 12.20 | 5  | 8   | 377  | 41.2  | 4.94 |
| Q9Y3Q7 | Disintegrin and metalloproteinase domain-containing protein 18<br>OS=Homo sapiens<br>GN=ADAM18<br>PE=2 SV=1 - [ADA18_HUMAN] | 2.44  | 1 | 1  | 1  | 1   | 0.970 | 0.831 | 1.798 | 0.740 | 0.00   | 2.44  | 1  | 1   | 739  | 82.8  | 7.28 |

|        |                                                                                                             |       |   |    |    |     |       |       |       |       |        |       |    |     |      |       |      |
|--------|-------------------------------------------------------------------------------------------------------------|-------|---|----|----|-----|-------|-------|-------|-------|--------|-------|----|-----|------|-------|------|
| P10721 | Mast/stem cell growth factor receptor Kit<br>OS=Homo sapiens<br>GN=KIT PE=1 SV=1 - [KIT_HUMAN]              | 1.64  | 5 | 1  | 2  | 4   | 0.868 | 0.898 | 0.987 | 0.740 | 9.37   | 1.64  | 3  | 4   | 976  | 109.8 | 6.98 |
| Q98TV4 | Transmembrane protein 43<br>OS=Homo sapiens<br>GN=TMEM43 PE=1 SV=1 - [TMM43_HUMAN]                          | 46.50 | 3 | 19 | 19 | 108 | 0.858 | 0.840 | 0.926 | 0.740 | 216.86 | 46.50 | 32 | 108 | 400  | 44.8  | 8.13 |
| Q96D15 | Reticulocalbin-3<br>OS=Homo sapiens<br>GN=RCN3 PE=1 SV=1 - [RCN3_HUMAN]                                     | 48.78 | 1 | 14 | 14 | 282 | 0.691 | 0.630 | 0.831 | 0.741 | 760.86 | 48.78 | 26 | 282 | 328  | 37.5  | 4.89 |
| Q99933 | BAG family molecular chaperone regulator 1<br>OS=Homo sapiens<br>GN=BAG1 PE=1 SV=4 - [BAG1_HUMAN]           | 2.32  | 1 | 1  | 1  | 2   | 1.262 | 1.792 | 0.770 | 0.741 | 4.27   | 2.32  | 1  | 2   | 345  | 38.8  | 7.81 |
| Q96S38 | Ribosomal protein S6 kinase delta-1<br>OS=Homo sapiens<br>GN=RPS6KC1 PE=1 SV=2 - [KS6C1_HUMAN]              | 1.69  | 1 | 2  | 2  | 2   | 0.605 | 0.748 | 0.882 | 0.741 | 2.02   | 1.69  | 2  | 2   | 1066 | 118.6 | 4.87 |
| Q9NZU1 | Leucine-rich repeat transmembrane protein<br>FLRT1<br>OS=Homo sapiens<br>GN=FLRT1 PE=1 SV=3 - [FLRT1_HUMAN] | 1.86  | 1 | 1  | 1  | 1   | 0.728 | 0.947 | 0.909 | 0.741 | 2.64   | 1.86  | 1  | 1   | 646  | 71.3  | 6.38 |
| Q9NRY5 | Protein FAM114A2<br>OS=Homo sapiens<br>GN=FAM114A2 PE=1 SV=4 - [F1142_HUMAN]                                | 23.96 | 1 | 10 | 10 | 27  | 0.778 | 0.833 | 0.795 | 0.741 | 68.70  | 23.96 | 13 | 27  | 505  | 55.4  | 4.88 |
| Q8ND07 | Basal body-orientation factor 1<br>OS=Homo sapiens<br>GN=CCDC176 PE=2 SV=3 - [BBOF1_HUMAN]                  | 1.32  | 1 | 1  | 1  | 1   | 0.997 | 0.907 | 1.190 | 0.741 | 0.00   | 1.32  | 1  | 1   | 529  | 61.9  | 9.04 |
| Q9H6S0 | Probable ATP-dependent RNA helicase YTHDC2<br>OS=Homo sapiens<br>GN=YTHDC2 PE=1 SV=2 - [YTHDC2_HUMAN]       | 1.61  | 1 | 2  | 3  | 20  | 1.093 | 0.890 | 1.204 | 0.742 | 47.81  | 1.61  | 5  | 20  | 1430 | 160.1 | 8.40 |

|        |                                                                                                                |       |   |   |   |    |       |       |       |       |       |       |    |    |      |       |      |
|--------|----------------------------------------------------------------------------------------------------------------|-------|---|---|---|----|-------|-------|-------|-------|-------|-------|----|----|------|-------|------|
| P45984 | Mitogen-activated protein kinase<br>9 OS=Homo sapiens<br>GN=MAPK9<br>PE=1 SV=2 - [MK09_HUMAN]                  | 25.24 | 3 | 5 | 9 | 19 | 0.938 | 0.756 | 0.593 | 0.742 | 41.60 | 25.24 | 15 | 19 | 424  | 48.1  | 5.63 |
| P98172 | Ephrin-B1<br>OS=Homo sapiens<br>GN=EFNB1<br>PE=1 SV=1 - [EFNB1_HUMAN]                                          | 5.20  | 1 | 1 | 1 | 2  | 1.539 | 1.601 | 1.125 | 0.743 | 4.65  | 5.20  | 2  | 2  | 346  | 38.0  | 8.94 |
| Q96KQ7 | Histone-lysine N-methyltransferase EHMT2<br>OS=Homo sapiens<br>GN=EHMT2<br>PE=1 SV=3 - [EHMT2_HUMAN]           | 3.72  | 1 | 2 | 2 | 3  |       |       |       | 0.743 | 5.64  | 3.72  | 2  | 3  | 1210 | 132.3 | 5.45 |
| Q9UGJ1 | Gamma-tubulin complex component 4<br>OS=Homo sapiens<br>GN=TUBGCP4<br>PE=1 SV=1 - [GCP4_HUMAN]                 | 3.75  | 1 | 2 | 2 | 9  | 0.762 | 0.952 | 1.021 | 0.743 | 34.64 | 3.75  | 3  | 9  | 667  | 76.0  | 6.65 |
| Q5SW96 | Low density lipoprotein receptor adapter protein 1<br>OS=Homo sapiens<br>GN=LDLRAP1<br>PE=1 SV=3 - [ARH_HUMAN] | 9.74  | 1 | 3 | 3 | 8  | 1.128 | 0.474 | 0.854 | 0.743 | 19.23 | 9.74  | 6  | 8  | 308  | 33.9  | 6.70 |
| Q9P0R6 | GSK3-beta interaction protein<br>OS=Homo sapiens<br>GN=GSKIP<br>PE=1 SV=2 - [GSKIP_HUMAN]                      | 7.19  | 1 | 1 | 1 | 2  | 0.699 | 1.011 | 1.025 | 0.743 | 4.83  | 7.19  | 1  | 2  | 139  | 15.6  | 4.48 |
| Q9Y6N9 | Harmonin<br>OS=Homo sapiens<br>GN=USH1C<br>PE=1 SV=3 - [USH1C_HUMAN]                                           | 1.27  | 1 | 1 | 1 | 1  | 0.852 | 0.711 | 0.945 | 0.744 | 2.33  | 1.27  | 1  | 1  | 552  | 62.2  | 5.49 |
| Q15125 | 3-beta-hydroxysteroid-Delta(8),Delta(7)-isomerase<br>OS=Homo sapiens<br>GN=EBP<br>PE=1 SV=3 - [EBP_HUMAN]      | 5.22  | 1 | 1 | 1 | 5  | 0.598 | 0.986 | 0.983 | 0.744 | 7.23  | 5.22  | 2  | 5  | 230  | 26.3  | 7.90 |
| O15162 | Phospholipid scramblase 1<br>OS=Homo sapiens<br>GN=PLSCR1<br>PE=1 SV=1 - [PLS1_HUMAN]                          | 2.20  | 1 | 1 | 1 | 4  | 1.175 | 1.054 | 0.713 | 0.744 | 6.13  | 2.20  | 2  | 4  | 318  | 35.0  | 4.94 |



|        |                                                                                                         |       |   |    |    |     |       |       |       |       |        |       |    |     |      |       |      |
|--------|---------------------------------------------------------------------------------------------------------|-------|---|----|----|-----|-------|-------|-------|-------|--------|-------|----|-----|------|-------|------|
| Q9HZY7 | Zinc finger protein 106<br>OS=Homo sapiens<br>GN=ZNF106<br>PE=1 SV=1 - [ZNF106_HUMAN]                   | 1.49  | 1 | 2  | 3  | 15  | 0.608 | 1.015 | 1.100 | 0.744 | 25.67  | 1.49  | 3  | 15  | 1883 | 208.8 | 7.15 |
| Q9NS86 | LanC-like protein 2<br>OS=Homo sapiens<br>GN=LANC2<br>PE=1 SV=1 - [LANC2_HUMAN]                         | 9.33  | 1 | 3  | 3  | 7   | 0.900 | 0.665 | 0.703 | 0.744 | 13.89  | 9.33  | 6  | 7   | 450  | 50.8  | 7.43 |
| Q96HC4 | PDZ and LIM domain protein 5<br>OS=Homo sapiens<br>GN=PDLIM5<br>PE=1 SV=5 - [PDLIM5_HUMAN]              | 41.78 | 1 | 22 | 22 | 193 | 1.111 | 1.504 | 1.306 | 0.744 | 438.38 | 41.78 | 40 | 193 | 596  | 63.9  | 8.21 |
| Q5VTQ0 | Tetratricopeptide repeat protein 39B<br>OS=Homo sapiens<br>GN=TTC39B<br>PE=2 SV=4 - [TTC39B_HUMAN]      | 2.05  | 1 | 2  | 2  | 2   | 0.789 | 0.640 | 0.556 | 0.744 | 3.70   | 2.05  | 2  | 2   | 682  | 76.9  | 7.39 |
| Q9BSY9 | Desumoylating isopeptidase 2<br>OS=Homo sapiens<br>GN=DES12<br>PE=1 SV=1 - [DES12_HUMAN]                | 4.64  | 1 | 1  | 1  | 4   | 0.581 | 0.626 | 0.894 | 0.744 | 11.62  | 4.64  | 2  | 4   | 194  | 21.4  | 4.92 |
| P52306 | Rap1 GTPase-GDP dissociation stimulator 1<br>OS=Homo sapiens<br>GN=RAP1GDS1<br>PE=1 SV=3 - [GDS1_HUMAN] | 41.19 | 2 | 19 | 21 | 80  | 0.785 | 1.011 | 1.237 | 0.745 | 213.46 | 41.19 | 34 | 80  | 607  | 66.3  | 5.31 |
| Q8IY95 | Transmembrane protein 192<br>OS=Homo sapiens<br>GN=TMEM192<br>PE=1 SV=1 - [TMEM192_HUMAN]               | 12.18 | 1 | 3  | 3  | 10  | 0.611 | 0.650 | 0.801 | 0.745 | 19.86  | 12.18 | 5  | 10  | 271  | 30.9  | 7.99 |
| Q8TEW8 | Partitioning defective 3 homolog B<br>OS=Homo sapiens<br>GN=PAR3B<br>PE=1 SV=2 - [PAR3L_HUMAN]          | 13.03 | 1 | 14 | 15 | 33  | 0.741 | 0.927 | 1.418 | 0.745 | 66.22  | 13.03 | 25 | 33  | 1205 | 132.4 | 8.37 |
| P33261 | Cytochrome P450 2C19<br>OS=Homo sapiens<br>GN=CYP2C19<br>PE=1 SV=3 - [CYP2C19_HUMAN]                    | 2.45  | 4 | 1  | 2  | 3   | 0.509 | 0.819 | 1.319 | 0.745 | 1.68   | 2.45  | 2  | 3   | 490  | 55.9  | 7.39 |

|        |                                                                                                          |       |   |    |    |    |       |       |       |       |        |       |    |    |      |       |      |
|--------|----------------------------------------------------------------------------------------------------------|-------|---|----|----|----|-------|-------|-------|-------|--------|-------|----|----|------|-------|------|
| O43921 | Ephrin-A2<br>OS=Homo sapiens<br>GN=EFNA2<br>PE=1 SV=1 - [EFNA2_HUMAN]                                    | 6.57  | 1 | 1  | 1  | 1  | 1.150 | 0.720 | 0.927 | 0.745 | 0.00   | 6.57  | 1  | 1  | 213  | 23.9  | 7.40 |
| Q96K49 | Transmembrane protein 87B<br>OS=Homo sapiens<br>GN=TMEM87B<br>PE=1 SV=1 - [TM87B_HUMAN]                  | 8.65  | 1 | 4  | 4  | 11 | 1.213 | 0.668 | 1.010 | 0.745 | 24.31  | 8.65  | 7  | 11 | 555  | 63.5  | 7.44 |
| P61960 | Ubiquitin-fold modifier 1<br>OS=Homo sapiens<br>GN=UFM1<br>PE=1 SV=1 - [UFM1_HUMAN]                      | 25.88 | 1 | 2  | 2  | 8  | 0.486 | 0.732 | 0.784 | 0.745 | 23.70  | 25.88 | 4  | 8  | 85   | 9.1   | 9.31 |
| P20339 | Ras-related protein Rab-5A<br>OS=Homo sapiens<br>GN=RAB5A<br>PE=1 SV=2 - [RAB5A_HUMAN]                   | 38.60 | 1 | 4  | 6  | 22 | 0.813 | 0.851 | 0.837 | 0.745 | 61.64  | 38.60 | 10 | 22 | 215  | 23.6  | 8.15 |
| O00400 | Acetyl-coenzyme A transporter 1<br>OS=Homo sapiens<br>GN=SLC33A1<br>PE=1 SV=1 - [ACATN_HUMAN]            | 12.93 | 1 | 5  | 5  | 15 | 0.783 | 0.853 | 0.962 | 0.746 | 31.99  | 12.93 | 8  | 15 | 549  | 60.9  | 7.33 |
| Q9Y3P9 | Rab GTPase-activating protein 1<br>OS=Homo sapiens<br>GN=RABGAP1<br>PE=1 SV=3 - [RBGP1_HUMAN]            | 16.37 | 1 | 12 | 15 | 49 | 0.824 | 1.221 | 1.451 | 0.746 | 106.71 | 16.37 | 25 | 49 | 1069 | 121.7 | 5.25 |
| Q96JX3 | Protein SERAC1<br>OS=Homo sapiens<br>GN=SERAC1<br>PE=1 SV=1 - [SRAC1_HUMAN]                              | 1.53  | 1 | 1  | 1  | 2  | 1.526 | 0.815 | 0.736 | 0.746 | 0.00   | 1.53  | 1  | 2  | 654  | 74.1  | 7.68 |
| Q9Y547 | Intraflagellar transport protein 25 homolog<br>OS=Homo sapiens<br>GN=HSPB11<br>PE=1 SV=1 - [IFT25_HUMAN] | 10.42 | 1 | 1  | 1  | 2  | 1.471 | 1.066 | 0.378 | 0.746 | 8.98   | 10.42 | 1  | 2  | 144  | 16.3  | 5.03 |
| Q9HIR2 | Dual specificity protein phosphatase 15<br>OS=Homo sapiens<br>GN=DUSP15<br>PE=1 SV=4 - [DUS15_HUMAN]     | 4.07  | 1 | 1  | 1  | 1  | 1.745 | 1.392 | 1.059 | 0.746 | 0.00   | 4.07  | 1  | 1  | 295  | 31.9  | 8.38 |

|        |                                                                                                                                  |       |   |   |   |    |       |       |       |       |       |       |    |    |      |       |      |
|--------|----------------------------------------------------------------------------------------------------------------------------------|-------|---|---|---|----|-------|-------|-------|-------|-------|-------|----|----|------|-------|------|
| O95197 | Reticulon-3<br>OS=Homo sapiens<br>GN=RTN3<br>PE=1 SV=2 - [RTN3_HUMAN]                                                            | 1.84  | 1 | 2 | 3 | 11 | 0.758 | 0.766 | 0.716 | 0.746 | 14.68 | 1.84  | 5  | 11 | 1032 | 112.5 | 4.96 |
| Q9BZE2 | tRNA pseudouridine(38/39) synthase<br>OS=Homo sapiens<br>GN=PUS3<br>PE=1 SV=3 - [PUS3_HUMAN]                                     | 1.66  | 1 | 1 | 1 | 2  | 0.102 | 0.927 | 1.242 | 0.747 | 4.57  | 1.66  | 1  | 2  | 481  | 55.6  | 7.49 |
| Q9BTX7 | Alpha-tocopherol transfer protein-like<br>OS=Homo sapiens<br>GN=TTPAL<br>PE=2 SV=2 - [TTPAL_HUMAN]                               | 11.99 | 1 | 3 | 4 | 5  | 0.620 | 1.323 | 2.346 | 0.747 | 11.95 | 11.99 | 4  | 5  | 342  | 38.5  | 6.44 |
| Q9GZM8 | Nuclear distribution protein nude-like 1<br>OS=Homo sapiens<br>GN=NDEL1<br>PE=1 SV=1 - [NDEL1_HUMAN]                             | 7.54  | 1 | 2 | 3 | 6  | 0.789 | 0.760 | 1.028 | 0.747 | 9.07  | 7.54  | 5  | 6  | 345  | 38.4  | 5.24 |
| Q9Y3L5 | Ras-related protein Rap-2c<br>OS=Homo sapiens<br>GN=RAP2C<br>PE=1 SV=1 - [RAP2C_HUMAN]                                           | 32.79 | 2 | 2 | 5 | 14 | 1.317 | 2.226 | 1.044 | 0.747 | 33.73 | 32.79 | 8  | 14 | 183  | 20.7  | 4.94 |
| P15374 | Ubiquitin carboxyl-terminal hydrolase isozyme L3<br>OS=Homo sapiens<br>GN=UCHL3<br>PE=1 SV=1 - [UCHL3_HUMAN]                     | 42.17 | 1 | 9 | 9 | 41 | 0.812 | 1.003 | 1.042 | 0.747 | 95.55 | 42.17 | 17 | 41 | 230  | 26.2  | 4.92 |
| Q9P242 | Neuronal tyrosine-phosphorylated phosphoinositide-3-kinase adapter 2<br>OS=Homo sapiens<br>GN=NYAP2<br>PE=1 SV=3 - [NYAP2_HUMAN] | 5.05  | 1 | 2 | 2 | 2  | 0.961 | 0.975 | 1.211 | 0.747 | 5.75  | 5.05  | 2  | 2  | 653  | 70.5  | 8.48 |
| O75603 | Chorion-specific transcription factor GCMB<br>OS=Homo sapiens<br>GN=GCM2<br>PE=1 SV=1 - [GCM2_HUMAN]                             | 6.32  | 1 | 2 | 2 | 2  | 0.897 | 0.703 | 1.112 | 0.747 | 5.19  | 6.32  | 2  | 2  | 506  | 56.6  | 7.39 |

|        |                                                                                                              |       |   |    |    |      |       |       |       |       |         |       |    |      |     |      |      |
|--------|--------------------------------------------------------------------------------------------------------------|-------|---|----|----|------|-------|-------|-------|-------|---------|-------|----|------|-----|------|------|
| Q92558 | Wiskott-Aldrich syndrome protein family member 1<br>OS=Homo sapiens<br>GN=WASF1<br>PE=1 SV=1 - [WASF1_HUMAN] | 6.98  | 1 | 4  | 5  | 5    | 0.804 | 1.211 | 1.031 | 0.747 | 12.34   | 6.98  | 5  | 5    | 559 | 61.6 | 6.46 |
| Q14019 | Coactosin-like protein<br>OS=Homo sapiens<br>GN=COTL1<br>PE=1 SV=3 - [COTL1_HUMAN]                           | 73.94 | 1 | 14 | 14 | 128  | 0.975 | 0.757 | 0.967 | 0.748 | 283.70  | 73.94 | 22 | 128  | 142 | 15.9 | 5.67 |
| P04075 | Fructose-bisphosphate aldolase A<br>OS=Homo sapiens<br>GN=ALDOA<br>PE=1 SV=2 - [ALDOA_HUMAN]                 | 79.95 | 2 | 28 | 37 | 1871 | 1.036 | 0.909 | 1.012 | 0.748 | 4998.81 | 79.95 | 64 | 1871 | 364 | 39.4 | 8.09 |
| Q99619 | SPRY domain-containing SOCS box protein 2<br>OS=Homo sapiens<br>GN=SPSB2<br>PE=1 SV=1 - [SPSB2_HUMAN]        | 3.04  | 1 | 1  | 1  | 1    | 0.539 | 0.509 | 0.726 | 0.748 | 2.70    | 3.04  | 1  | 1    | 263 | 28.6 | 8.18 |
| P00751 | Complement factor B<br>OS=Homo sapiens<br>GN=CFB PE=1 SV=2 - [CFAB_HUMAN]                                    | 2.49  | 1 | 2  | 2  | 6    | 0.562 | 1.621 | 1.641 | 0.748 | 8.93    | 2.49  | 4  | 6    | 764 | 85.5 | 7.06 |
| P0CG34 | Thymosin beta-15A<br>OS=Homo sapiens<br>GN=TMSB15A<br>PE=1 SV=1 - [TB15A_HUMAN]                              | 28.89 | 1 | 2  | 2  | 130  | 1.868 | 2.115 | 1.466 | 0.749 | 307.92  | 28.89 | 3  | 130  | 45  | 5.2  | 5.36 |
| Q9NUM4 | Transmembrane protein 106B<br>OS=Homo sapiens<br>GN=TMEM106B<br>PE=1 SV=2 - [T106B_HUMAN]                    | 11.68 | 1 | 3  | 3  | 5    | 0.924 | 0.773 | 0.565 | 0.749 | 7.66    | 11.68 | 4  | 5    | 274 | 31.1 | 6.99 |
| Q9H2J4 | Phosducin-like protein 3<br>OS=Homo sapiens<br>GN=PDCL3<br>PE=1 SV=1 - [PDCL3_HUMAN]                         | 26.36 | 1 | 5  | 5  | 9    | 0.761 | 0.697 | 1.014 | 0.749 | 16.66   | 26.36 | 7  | 9    | 239 | 27.6 | 4.84 |
| P63098 | Calcineurin subunit B type 1<br>OS=Homo sapiens<br>GN=PPP3R1<br>PE=1 SV=2 - [CANB1_HUMAN]                    | 72.94 | 1 | 9  | 9  | 35   | 0.954 | 1.119 | 1.108 | 0.749 | 68.06   | 72.94 | 14 | 35   | 170 | 19.3 | 4.81 |

|        |                                                                                                                                                   |       |   |   |    |     |       |       |       |       |        |       |    |     |      |       |      |
|--------|---------------------------------------------------------------------------------------------------------------------------------------------------|-------|---|---|----|-----|-------|-------|-------|-------|--------|-------|----|-----|------|-------|------|
| Q9UQ52 | Contactin-6<br>OS=Homo sapiens<br>GN=CNTN6<br>PE=1 SV=1 - [CNTN6_HUMAN]                                                                           | 2.14  | 1 | 2 | 2  | 4   | 1.003 | 0.962 | 1.223 | 0.749 | 8.86   | 2.14  | 2  | 4   | 1028 | 113.9 | 6.00 |
| Q05639 | Elongation factor 1-alpha<br>2 OS=Homo sapiens<br>GN=EEF1A2<br>PE=1 SV=1 - [EF1A2_HUMAN]                                                          | 37.37 | 1 | 2 | 17 | 355 | 1.510 | 0.901 | 1.288 | 0.749 | 857.90 | 37.37 | 27 | 355 | 463  | 50.4  | 9.03 |
| Q9P289 | Serine/threonine-protein kinase 26<br>OS=Homo sapiens<br>GN=STK26<br>PE=1 SV=2 - [STK26_HUMAN]                                                    | 23.32 | 1 | 3 | 10 | 33  | 0.628 | 1.382 | 1.766 | 0.749 | 76.21  | 23.32 | 18 | 33  | 416  | 46.5  | 5.29 |
| P50542 | Peroxisomal targeting signal 1 receptor<br>OS=Homo sapiens<br>GN=PEX5<br>PE=1 SV=3 - [PEX5_HUMAN]                                                 | 12.68 | 1 | 6 | 6  | 23  | 1.060 | 1.028 | 0.898 | 0.749 | 45.84  | 12.68 | 8  | 23  | 639  | 70.8  | 4.54 |
| Q9NX45 | Spermatogenesis- and oogenesis-specific basic helix-loop-helix-containing protein 2<br>OS=Homo sapiens<br>GN=SOHLH2<br>PE=2 SV=2 - [SOHLH2_HUMAN] | 4.71  | 1 | 1 | 1  | 1   | 1.052 | 0.884 | 1.122 | 0.749 | 0.00   | 4.71  | 1  | 1   | 425  | 46.9  | 7.17 |
| Q6ZSY5 | Protein phosphatase 1 regulatory subunit 3F<br>OS=Homo sapiens<br>GN=PPP1R3F<br>PE=1 SV=3 - [PPR3F_HUMAN]                                         | 1.38  | 1 | 1 | 1  | 1   | 0.996 | 1.202 | 1.042 | 0.750 | 1.99   | 1.38  | 1  | 1   | 799  | 82.7  | 4.60 |
| Q92882 | Osteodast-stimulating factor 1<br>OS=Homo sapiens<br>GN=OSTF1<br>PE=1 SV=2 - [OSTF1_HUMAN]                                                        | 21.03 | 1 | 3 | 3  | 10  | 1.009 | 0.796 | 1.097 | 0.750 | 19.79  | 21.03 | 5  | 10  | 214  | 23.8  | 5.68 |
| P51606 | N-acetylglucosamine 2-epimerase<br>OS=Homo sapiens<br>GN=RENBP<br>PE=1 SV=2 - [RENBP_HUMAN]                                                       | 1.41  | 1 | 1 | 1  | 2   | 0.657 | 1.186 | 1.456 | 0.750 | 2.19   | 1.41  | 1  | 2   | 427  | 48.8  | 6.37 |

|        |                                                                                                              |       |   |   |   |    |       |       |       |       |       |       |    |    |      |       |      |
|--------|--------------------------------------------------------------------------------------------------------------|-------|---|---|---|----|-------|-------|-------|-------|-------|-------|----|----|------|-------|------|
| Q03113 | Guanine nucleotide-binding protein subunit alpha-12 OS=Homo sapiens<br>GN=GNA12<br>PE=1 SV=4 - [GNA12_HUMAN] | 13.39 | 1 | 3 | 5 | 22 | 1.085 | 1.331 | 0.922 | 0.750 | 66.06 | 13.39 | 10 | 22 | 381  | 44.3  | 9.83 |
| P31431 | Syndecan-4 OS=Homo sapiens<br>GN=SDC4<br>PE=1 SV=2 - [SDC4_HUMAN]                                            | 20.20 | 1 | 3 | 3 | 10 | 0.855 | 1.007 | 1.020 | 0.750 | 28.92 | 20.20 | 6  | 10 | 198  | 21.6  | 4.50 |
| Q8WVDS | RING finger protein 141 OS=Homo sapiens<br>GN=RNFI41<br>PE=1 SV=1 - [RNFI41_HUMAN]                           | 4.35  | 1 | 1 | 1 | 1  | 0.606 | 0.900 | 1.284 | 0.750 | 1.84  | 4.35  | 1  | 1  | 230  | 25.5  | 5.20 |
| O15063 | Uncharacterized protein KIAA0355 OS=Homo sapiens<br>GN=KIAA0355<br>PE=1 SV=2 - [K0355_HUMAN]                 | 1.03  | 1 | 1 | 1 | 1  | 0.651 | 0.931 | 1.228 | 0.750 | 2.40  | 1.03  | 1  | 1  | 1070 | 115.9 | 7.15 |
| P19634 | Sodium/hydrogen exchanger 1 OS=Homo sapiens<br>GN=SLC9A1<br>PE=1 SV=2 - [SL9A1_HUMAN]                        | 13.99 | 1 | 7 | 7 | 28 | 0.726 | 0.721 | 0.963 | 0.750 | 65.63 | 13.99 | 9  | 28 | 815  | 90.7  | 7.21 |
| Q9UN79 | Transcription factor SOX-13 OS=Homo sapiens<br>GN=SOX13<br>PE=1 SV=3 - [SOX13_HUMAN]                         | 3.22  | 1 | 1 | 2 | 2  | 0.798 | 1.120 | 1.021 | 0.751 | 4.77  | 3.22  | 2  | 2  | 622  | 69.2  | 6.71 |
| O43791 | Speckle-type POZ protein OS=Homo sapiens<br>GN=SPOP<br>PE=1 SV=1 - [SPOP_HUMAN]                              | 4.01  | 2 | 1 | 1 | 2  | 1.044 | 0.911 | 1.102 | 0.751 | 4.59  | 4.01  | 1  | 2  | 374  | 42.1  | 5.80 |
| Q9BXB5 | Cholesterol-binding protein-related protein 10 OS=Homo sapiens<br>GN=OSBPL10<br>PE=1 SV=2 - [OSB10_HUMAN]    | 6.81  | 1 | 3 | 4 | 7  | 1.370 | 0.890 | 1.273 | 0.751 | 13.57 | 6.81  | 5  | 7  | 764  | 83.9  | 8.31 |
| O00418 | Eukaryotic elongation factor 2 kinase OS=Homo sapiens<br>GN=EEF2K<br>PE=1 SV=2 - [EF2K_HUMAN]                | 4.28  | 1 | 3 | 3 | 7  | 0.543 | 0.986 | 1.099 | 0.751 | 16.40 | 4.28  | 4  | 7  | 725  | 82.1  | 5.33 |

|        |                                                                                                       |       |   |    |    |     |       |       |       |       |        |       |    |     |      |       |      |
|--------|-------------------------------------------------------------------------------------------------------|-------|---|----|----|-----|-------|-------|-------|-------|--------|-------|----|-----|------|-------|------|
| P05787 | Keratin, type II cytoskeletal 8 OS=Homo sapiens<br>GN=KRT8<br>PE=1 SV=7 - [K2C8_HUMAN]                | 38.92 | 2 | 16 | 23 | 169 | 0.874 | 7.391 | 1.230 | 0.751 | 333.33 | 38.92 | 36 | 169 | 483  | 53.7  | 5.59 |
| P61020 | Ras-related protein Rab-5B OS=Homo sapiens<br>GN=RAB5B<br>PE=1 SV=1 - [RAB5B_HUMAN]                   | 31.16 | 1 | 3  | 5  | 18  | 0.783 | 1.134 | 1.093 | 0.751 | 43.43  | 31.16 | 9  | 18  | 215  | 23.7  | 8.13 |
| P26006 | Integrin alpha-3 OS=Homo sapiens<br>GN=ITGA3<br>PE=1 SV=5 - [ITA3_HUMAN]                              | 8.28  | 1 | 7  | 7  | 24  | 1.627 | 0.871 | 1.210 | 0.752 | 77.80  | 8.28  | 13 | 24  | 1051 | 116.5 | 6.77 |
| P20810 | Calpastatin OS=Homo sapiens<br>GN=CAST<br>PE=1 SV=4 - [ICAL_HUMAN]                                    | 45.62 | 1 | 31 | 31 | 186 | 0.868 | 1.277 | 1.134 | 0.752 | 433.94 | 45.62 | 49 | 186 | 708  | 76.5  | 5.07 |
| O15050 | TPR and ankyrin repeat-containing protein 1 OS=Homo sapiens<br>GN=TRANK1<br>PE=2 SV=4 - [TRNK1_HUMAN] | 0.72  | 1 | 2  | 2  | 2   | 0.779 | 0.760 | 0.689 | 0.752 | 2.17   | 0.72  | 2  | 2   | 2925 | 336.0 | 6.76 |
| O15440 | Multidrug resistance-associated protein 5 OS=Homo sapiens<br>GN=ABCC5<br>PE=1 SV=2 - [MRP5_HUMAN]     | 0.84  | 1 | 1  | 1  | 2   | 0.534 | 0.517 | 0.659 | 0.752 | 0.00   | 0.84  | 1  | 2   | 1437 | 160.6 | 8.66 |
| Q5JPB2 | Zinc finger protein 831 OS=Homo sapiens<br>GN=ZNF831<br>PE=2 SV=4 - [ZNF831_HUMAN]                    | 1.01  | 1 | 2  | 2  | 3   | 0.771 | 1.524 | 1.371 | 0.752 | 8.76   | 1.01  | 2  | 3   | 1677 | 177.8 | 8.34 |
| Q9NPA8 | Transcription and mRNA export factor ENY2 OS=Homo sapiens<br>GN=ENY2<br>PE=1 SV=1 - [ENY2_HUMAN]      | 32.67 | 1 | 3  | 3  | 9   | 0.766 | 0.732 | 0.772 | 0.752 | 19.73  | 32.67 | 4  | 9   | 101  | 11.5  | 9.33 |
| Q81YB1 | Protein MB21D2 OS=Homo sapiens<br>GN=MB21D2<br>PE=1 SV=3 - [M21D2_HUMAN]                              | 1.63  | 1 | 1  | 1  | 1   | 0.675 | 0.594 | 0.844 | 0.752 | 2.46   | 1.63  | 1  | 1   | 491  | 55.8  | 7.03 |

|        |                                                                                                                  |       |   |    |    |    |       |       |       |       |        |       |    |    |      |       |      |
|--------|------------------------------------------------------------------------------------------------------------------|-------|---|----|----|----|-------|-------|-------|-------|--------|-------|----|----|------|-------|------|
| Q9ULI3 | Protein HEG homolog 1<br>OS=Homo sapiens<br>GN=HEG1<br>PE=1 SV=3 - [HEG1_HUMAN]                                  | 8.18  | 1 | 10 | 10 | 20 | 1.256 | 0.735 | 1.273 | 0.752 | 61.67  | 8.18  | 13 | 20 | 1381 | 147.4 | 6.18 |
| P41091 | Eukaryotic translation initiation factor 2 subunit 3<br>OS=Homo sapiens<br>GN=EIF2S3<br>PE=1 SV=3 - [IF2G_HUMAN] | 38.56 | 2 | 15 | 15 | 70 | 0.803 | 0.743 | 0.803 | 0.752 | 184.90 | 38.56 | 25 | 70 | 472  | 51.1  | 8.40 |
| P41236 | Protein phosphatase inhibitor 2<br>OS=Homo sapiens<br>GN=PPP1R2<br>PE=1 SV=2 - [IPP2_HUMAN]                      | 33.66 | 2 | 8  | 8  | 36 | 0.727 | 1.050 | 0.983 | 0.752 | 79.91  | 33.66 | 12 | 36 | 205  | 23.0  | 4.74 |
| Q6AI08 | HEAT repeat-containing protein 6<br>OS=Homo sapiens<br>GN=HEATR6<br>PE=1 SV=1 - [HEAT6_HUMAN]                    | 2.29  | 1 | 2  | 2  | 4  | 0.661 | 0.915 | 1.090 | 0.752 | 10.48  | 2.29  | 4  | 4  | 1181 | 128.7 | 7.03 |
| Q9HCM9 | E3 ubiquitin-protein ligase TRIM39<br>OS=Homo sapiens<br>GN=TRIM39<br>PE=1 SV=2 - [TRI39_HUMAN]                  | 2.51  | 1 | 1  | 1  | 1  | 1.123 | 1.307 | 1.202 | 0.753 | 0.00   | 2.51  | 1  | 1  | 518  | 59.7  | 7.68 |
| Q96AB6 | Protein N-terminal asparagine amidohydrolase<br>OS=Homo sapiens<br>GN=NTAN1<br>PE=1 SV=3 - [NTAN1_HUMAN]         | 8.71  | 1 | 2  | 2  | 3  | 1.363 | 0.828 | 1.353 | 0.753 | 7.54   | 8.71  | 3  | 3  | 310  | 34.7  | 6.27 |
| P28074 | Proteasome subunit beta type-5<br>OS=Homo sapiens<br>GN=PSMB5<br>PE=1 SV=3 - [PSB5_HUMAN]                        | 42.59 | 1 | 10 | 10 | 48 | 0.677 | 0.767 | 0.873 | 0.753 | 133.39 | 42.59 | 17 | 48 | 263  | 28.5  | 6.92 |
| Q13029 | PR domain zinc finger protein 2<br>OS=Homo sapiens<br>GN=PRDM2<br>PE=1 SV=3 - [PRDM2_HUMAN]                      | 1.69  | 1 | 2  | 3  | 12 | 0.847 | 0.897 | 1.037 | 0.753 | 23.80  | 1.69  | 3  | 12 | 1718 | 188.8 | 7.31 |
| Q9NXR7 | BRCA1-A complex subunit BRE<br>OS=Homo sapiens<br>GN=BRE PE=1 SV=2 - [BRE_HUMAN]                                 | 5.48  | 1 | 2  | 2  | 6  | 1.009 | 0.597 | 1.200 | 0.753 | 13.19  | 5.48  | 4  | 6  | 383  | 43.5  | 5.81 |



|        |                                                                                                                              |       |   |   |   |    |       |       |       |       |        |       |    |    |     |      |       |
|--------|------------------------------------------------------------------------------------------------------------------------------|-------|---|---|---|----|-------|-------|-------|-------|--------|-------|----|----|-----|------|-------|
| O94921 | Cyclin-dependent kinase 14<br>OS=Homo sapiens<br>GN=CDK14<br>PE=1 SV=3 - [CDK14_HUMAN]                                       | 5.54  | 6 | 1 | 2 | 12 | 1.059 | 0.379 | 0.579 | 0.753 | 23.06  | 5.54  | 3  | 12 | 469 | 53.0 | 8.92  |
| A2RU48 | Single-pass membrane and coiled-coil domain-containing protein 3<br>OS=Homo sapiens<br>GN=SMCO3<br>PE=2 SV=1 - [SMCO3_HUMAN] | 2.67  | 1 | 1 | 1 | 1  | 0.672 | 0.986 | 0.660 | 0.754 | 2.54   | 2.67  | 1  | 1  | 225 | 24.9 | 8.22  |
| P35318 | ADM OS=Homo sapiens<br>GN=ADM PE=1 SV=1 - [ADML_HUMAN]                                                                       | 4.32  | 1 | 1 | 1 | 1  | 0.807 | 0.504 | 0.802 | 0.755 | 2.44   | 4.32  | 1  | 1  | 185 | 20.4 | 10.84 |
| Q99436 | Proteasome subunit beta type-7<br>OS=Homo sapiens<br>GN=PSMB7<br>PE=1 SV=1 - [PSB7_HUMAN]                                    | 14.44 | 1 | 4 | 4 | 42 | 0.791 | 0.765 | 0.810 | 0.755 | 112.76 | 14.44 | 8  | 42 | 277 | 29.9 | 7.68  |
| Q13530 | Serine incorporator 3<br>OS=Homo sapiens<br>GN=SERIC3<br>PE=2 SV=2 - [SERC3_HUMAN]                                           | 3.81  | 1 | 2 | 2 | 3  | 0.910 | 0.517 | 0.647 | 0.756 | 2.11   | 3.81  | 3  | 3  | 473 | 52.5 | 7.46  |
| O60711 | Leupaxin<br>OS=Homo sapiens<br>GN=LPXN PE=1 SV=1 - [LPXN_HUMAN]                                                              | 2.85  | 1 | 1 | 1 | 3  | 0.814 | 1.301 | 1.567 | 0.756 | 8.94   | 2.85  | 2  | 3  | 386 | 43.3 | 6.01  |
| P62166 | Neuronal calcium sensor 1<br>OS=Homo sapiens<br>GN=NCS1<br>PE=1 SV=2 - [NCS1_HUMAN]                                          | 41.58 | 1 | 8 | 8 | 25 | 0.752 | 1.367 | 1.096 | 0.756 | 44.62  | 41.58 | 12 | 25 | 190 | 21.9 | 4.83  |
| O00115 | Deoxyribonuclease-2-alpha<br>OS=Homo sapiens<br>GN=DNASE2<br>PE=1 SV=2 - [DNS2A_HUMAN]                                       | 13.06 | 1 | 5 | 5 | 23 | 0.649 | 1.146 | 0.932 | 0.757 | 46.85  | 13.06 | 8  | 23 | 360 | 39.6 | 8.05  |
| Q8IV08 | Phospholipase D3<br>OS=Homo sapiens<br>GN=PLD3 PE=1 SV=1 - [PLD3_HUMAN]                                                      | 18.98 | 2 | 9 | 9 | 57 | 0.676 | 1.181 | 0.927 | 0.757 | 109.43 | 18.98 | 16 | 57 | 490 | 54.7 | 6.47  |

|        |                                                                                                                                                 |       |   |    |    |     |       |       |       |       |         |       |    |     |      |       |      |
|--------|-------------------------------------------------------------------------------------------------------------------------------------------------|-------|---|----|----|-----|-------|-------|-------|-------|---------|-------|----|-----|------|-------|------|
| Q04917 | 14-3-3 protein<br>eta OS=Homo<br>sapiens<br>GN=YVHAH<br>PE=1 SV=4 -<br>[1433F_HUMAN<br>]                                                        | 67.07 | 2 | 14 | 19 | 200 | 1.101 | 1.177 | 0.909 | 0.757 | 511.35  | 67.07 | 30 | 200 | 246  | 28.2  | 4.84 |
| Q9H1A4 | Anaphase-<br>promoting<br>complex<br>subunit 1<br>OS=Homo<br>sapiens<br>GN=ANAPC1<br>PE=1 SV=1 -<br>[APC1_HUMAN]                                | 1.85  | 1 | 3  | 3  | 4   | 0.889 | 1.097 | 0.915 | 0.757 | 8.36    | 1.85  | 4  | 4   | 1944 | 216.4 | 6.30 |
| Q9H792 | Pseudopodium-<br>enriched<br>atypical kinase<br>1 OS=Homo<br>sapiens<br>GN=PEAK1<br>PE=1 SV=4 -<br>[PEAK1_HUMAN<br>]                            | 20.68 | 1 | 31 | 31 | 84  | 0.797 | 0.680 | 1.104 | 0.757 | 230.38  | 20.68 | 46 | 84  | 1746 | 193.0 | 6.89 |
| P08758 | Annexin A5<br>OS=Homo<br>sapiens<br>GN=ANXA5<br>PE=1 SV=2 -<br>[ANXA5_HUMAN<br>]                                                                | 85.94 | 1 | 31 | 32 | 975 | 0.698 | 0.675 | 0.671 | 0.757 | 2578.75 | 85.94 | 50 | 975 | 320  | 35.9  | 5.05 |
| A2VDJ0 | Transmembran<br>e protein 131-<br>like OS=Homo<br>sapiens<br>GN=KIAA0922<br>PE=1 SV=2 -<br>[T131L_HUMAN<br>]                                    | 1.80  | 1 | 2  | 2  | 2   | 1.174 | 0.986 | 0.963 | 0.757 | 4.56    | 1.80  | 2  | 2   | 1609 | 179.2 | 6.86 |
| Q63HQ0 | AP-1 complex-<br>associated<br>regulatory<br>protein<br>OS=Homo<br>sapiens<br>GN=AP1AR<br>PE=1 SV=1 -<br>[AP1AR_HUMAN<br>]                      | 5.63  | 8 | 1  | 2  | 6   | 0.948 | 0.606 | 0.784 | 0.757 | 16.82   | 5.63  | 2  | 6   | 302  | 34.3  | 4.87 |
| Q6ZR37 | Pleckstrin<br>homology<br>domain-<br>containing<br>family G<br>member 7<br>OS=Homo<br>sapiens<br>GN=PLEKHG7<br>PE=2 SV=1 -<br>[PKHG7_HUMAN<br>] | 3.96  | 1 | 1  | 1  | 1   | 1.121 | 0.613 | 0.712 | 0.757 | 0.00    | 3.96  | 1  | 1   | 379  | 44.3  | 8.27 |
| Q14005 | Pro-interleukin-<br>16 OS=Homo<br>sapiens<br>GN=IL16 PE=1<br>SV=4 -<br>[IL16_HUMAN]                                                             | 5.56  | 1 | 4  | 4  | 10  | 0.931 | 0.953 | 0.802 | 0.758 | 21.93   | 5.56  | 5  | 10  | 1332 | 141.7 | 8.06 |
| Q9UBZ9 | DNA repair<br>protein REV1<br>OS=Homo<br>sapiens<br>GN=REV1<br>PE=1 SV=1 -<br>[REV1_HUMAN]                                                      | 1.20  | 1 | 2  | 2  | 2   | 0.745 | 0.729 | 0.652 | 0.758 | 2.10    | 1.20  | 2  | 2   | 1251 | 138.2 | 8.51 |

|        |                                                                                                                                             |       |   |    |    |     |       |       |       |       |         |       |     |     |      |       |       |
|--------|---------------------------------------------------------------------------------------------------------------------------------------------|-------|---|----|----|-----|-------|-------|-------|-------|---------|-------|-----|-----|------|-------|-------|
| Q8WVK2 | U4/U6.U5 small<br>nuclear<br>ribonucleoprotein<br>27 kDa<br>protein<br>OS=Homo<br>sapiens<br>GN=SNRNP27<br>PE=1 SV=1 -<br>[SNR27_HUMAN<br>] | 7.10  | 1 | 1  | 1  | 2   | 0.914 | 1.064 | 1.074 | 0.758 | 4.64    | 7.10  | 1   | 2   | 155  | 18.8  | 11.62 |
| P52756 | RNA-binding<br>protein 5<br>OS=Homo<br>sapiens<br>GN=RBM5<br>PE=1 SV=2 -<br>[RBM5_HUMAN]                                                    | 8.96  | 1 | 3  | 6  | 10  | 1.679 | 1.184 | 1.373 | 0.759 | 15.96   | 8.96  | 8   | 10  | 815  | 92.1  | 6.28  |
| O95866 | Protein G6b<br>OS=Homo<br>sapiens<br>GN=G6B PE=1<br>SV=1 -<br>[G6B_HUMAN]                                                                   | 7.47  | 1 | 1  | 1  | 1   | 0.778 | 1.431 | 1.363 | 0.759 | 2.81    | 7.47  | 1   | 1   | 241  | 26.1  | 9.61  |
| Q9UEE5 | Serine/threonine-<br>protein<br>kinase 17A<br>OS=Homo<br>sapiens<br>GN=STK17A<br>PE=1 SV=2 -<br>[ST17A_HUMAN<br>]                           | 1.93  | 1 | 1  | 1  | 4   | 0.851 | 0.825 | 0.866 | 0.759 | 8.76    | 1.93  | 2   | 4   | 414  | 46.5  | 5.15  |
| O15254 | Peroxisomal<br>acyl-coenzyme<br>A oxidase 3<br>OS=Homo<br>sapiens<br>GN=ACOX3<br>PE=1 SV=2 -<br>[ACOX3_HUMAN<br>]                           | 16.86 | 1 | 9  | 10 | 18  | 0.822 | 1.189 | 1.405 | 0.759 | 41.31   | 16.86 | 13  | 18  | 700  | 77.6  | 7.25  |
| Q8WVB6 | Chromosome<br>transmission<br>fidelity protein<br>18 homolog<br>OS=Homo<br>sapiens<br>GN=CTF18<br>PE=1 SV=1 -<br>[CTF18_HUMAN<br>]          | 6.05  | 1 | 3  | 4  | 11  | 1.002 | 0.617 | 1.213 | 0.759 | 11.74   | 6.05  | 5   | 11  | 975  | 107.3 | 7.21  |
| O43414 | ERI1<br>exoribonuclease<br>3 OS=Homo<br>sapiens<br>GN=ERI3 PE=1<br>SV=2 -<br>[ERI3_HUMAN]                                                   | 9.79  | 1 | 3  | 3  | 18  | 1.005 | 0.670 | 0.745 | 0.759 | 36.94   | 9.79  | 6   | 18  | 337  | 37.2  | 8.07  |
| P48058 | Glutamate<br>receptor 4<br>OS=Homo<br>sapiens<br>GN=GRIA4<br>PE=2 SV=2 -<br>[GRIA4_HUMAN<br>]                                               | 0.67  | 1 | 1  | 1  | 1   | 1.734 | 1.783 | 3.858 | 0.759 | 2.30    | 0.67  | 1   | 1   | 902  | 100.8 | 8.10  |
| Q00341 | Vigilin<br>OS=Homo<br>sapiens<br>GN=HDLBP<br>PE=1 SV=2 -<br>[VIGLN_HUMAN]                                                                   | 52.76 | 2 | 67 | 70 | 535 | 0.730 | 0.884 | 0.899 | 0.759 | 1387.18 | 52.76 | 112 | 535 | 1268 | 141.4 | 6.87  |

|        |                                                                                                  |       |   |     |     |     |       |       |       |       |         |       |     |     |      |       |      |
|--------|--------------------------------------------------------------------------------------------------|-------|---|-----|-----|-----|-------|-------|-------|-------|---------|-------|-----|-----|------|-------|------|
| P16989 | Y-box-binding protein 3<br>OS=Homo sapiens<br>GN=YBX3<br>PE=1 SV=4 - [YBOX3_HUMAN]               | 29.57 | 2 | 5   | 11  | 45  | 0.573 | 0.892 | 0.656 | 0.759 | 127.90  | 29.57 | 16  | 45  | 372  | 40.1  | 9.77 |
| P46939 | Utrophin<br>OS=Homo sapiens<br>GN=UTRN<br>PE=1 SV=2 - [UTRO_HUMAN]                               | 34.72 | 4 | 110 | 114 | 443 | 1.220 | 0.932 | 0.984 | 0.759 | 1121.16 | 34.72 | 183 | 443 | 3433 | 394.2 | 5.33 |
| Q13753 | Laminin subunit gamma-2<br>OS=Homo sapiens<br>GN=LAMC2<br>PE=1 SV=2 - [LAMC2_HUMAN]              | 1.68  | 1 | 1   | 1   | 2   | 1.344 | 0.330 | 1.508 | 0.760 | 0.00    | 1.68  | 1   | 2   | 1193 | 130.9 | 6.19 |
| Q9ULC3 | Ras-related protein Rab-23<br>OS=Homo sapiens<br>GN=RAB23<br>PE=1 SV=1 - [RAB23_HUMAN]           | 44.73 | 1 | 11  | 11  | 29  | 0.879 | 0.883 | 0.866 | 0.760 | 72.85   | 44.73 | 17  | 29  | 237  | 26.6  | 6.60 |
| O00189 | AP-4 complex subunit mu-1<br>OS=Homo sapiens<br>GN=AP4M1<br>PE=1 SV=2 - [AP4M1_HUMAN]            | 3.75  | 1 | 2   | 2   | 4   | 0.958 | 1.028 | 0.915 | 0.760 | 6.41    | 3.75  | 4   | 4   | 453  | 49.9  | 7.20 |
| Q86WN1 | FCH and double SH3 domains protein 1<br>OS=Homo sapiens<br>GN=FCHSD1<br>PE=2 SV=1 - [FCS1_HUMAN] | 10.58 | 1 | 6   | 6   | 16  | 0.715 | 1.087 | 1.550 | 0.760 | 43.82   | 10.58 | 11  | 16  | 690  | 76.9  | 5.34 |
| Q9BSW7 | Synaptotagmin-17<br>OS=Homo sapiens<br>GN=SYT17<br>PE=1 SV=1 - [SYT17_HUMAN]                     | 1.48  | 1 | 1   | 1   | 1   | 0.719 | 0.884 | 0.598 | 0.760 | 2.53    | 1.48  | 1   | 1   | 474  | 53.8  | 7.50 |
| O95772 | MLN64 N-terminal domain homolog<br>OS=Homo sapiens<br>GN=STARD3NL<br>PE=1 SV=1 - [MENTO_HUMAN]   | 8.97  | 1 | 2   | 2   | 14  | 0.470 | 0.830 | 0.734 | 0.760 | 37.16   | 8.97  | 3   | 14  | 234  | 26.6  | 4.81 |
| Q6ZVM7 | TOM1-like protein 2<br>OS=Homo sapiens<br>GN=TOM1L2<br>PE=1 SV=1 - [TM1L2_HUMAN]                 | 11.83 | 1 | 5   | 5   | 15  | 0.690 | 0.873 | 0.843 | 0.760 | 31.15   | 11.83 | 8   | 15  | 507  | 55.5  | 4.79 |

|        |                                                                                                                                             |       |   |    |    |     |       |       |       |       |        |       |    |     |      |       |      |
|--------|---------------------------------------------------------------------------------------------------------------------------------------------|-------|---|----|----|-----|-------|-------|-------|-------|--------|-------|----|-----|------|-------|------|
| A6NNS2 | Dehydrogenase<br>/reductase SDR<br>family member<br>7C OS=Homo<br>sapiens<br>GN=DHRS7C<br>PE=2 SV=3 -<br>[DRS7C_HUMAN<br>]                  | 6.73  | 1 | 2  | 2  | 4   | 1.194 | 1.332 | 1.090 | 0.760 | 10.28  | 6.73  | 2  | 4   | 312  | 34.9  | 8.47 |
| P11717 | Cation-<br>independent<br>mannose-6-<br>phosphate<br>receptor<br>OS=Homo<br>sapiens<br>GN=IGF2R<br>PE=1 SV=3 -<br>[MPRI_HUMAN]              | 18.55 | 1 | 41 | 42 | 106 | 0.784 | 0.624 | 0.791 | 0.760 | 262.69 | 18.55 | 63 | 106 | 2491 | 274.2 | 5.94 |
| O43324 | Eukaryotic<br>translation<br>elongation<br>factor 1<br>epsilon-1<br>OS=Homo<br>sapiens<br>GN=EEF1E1<br>PE=1 SV=1 -<br>[MCA3_HUMAN]          | 22.41 | 1 | 5  | 5  | 12  | 0.745 | 0.750 | 0.918 | 0.761 | 20.81  | 22.41 | 7  | 12  | 174  | 19.8  | 8.54 |
| P08247 | Synaptophysin<br>OS=Homo<br>sapiens<br>GN=SYP PE=1<br>SV=3 -<br>[SYPH_HUMAN]                                                                | 3.19  | 1 | 1  | 1  | 2   | 1.697 | 1.431 | 1.475 | 0.761 | 4.83   | 3.19  | 1  | 2   | 313  | 33.8  | 4.81 |
| Q9BX95 | Sphingosine-1-<br>phosphate<br>phosphatase 1<br>OS=Homo<br>sapiens<br>GN=SGPP1<br>PE=1 SV=2 -<br>[SGPP1_HUMAN<br>]                          | 5.67  | 1 | 2  | 2  | 2   | 0.379 | 0.880 | 0.921 | 0.761 | 3.44   | 5.67  | 2  | 2   | 441  | 49.1  | 8.82 |
| P15090 | Fatty acid-<br>binding<br>protein,<br>adipocyte<br>OS=Homo<br>sapiens<br>GN=FABP4<br>PE=1 SV=3 -<br>[FABP4_HUMAN]                           | 15.91 | 1 | 1  | 2  | 4   | 0.768 | 1.016 | 8.560 | 0.761 | 6.36   | 15.91 | 4  | 4   | 132  | 14.7  | 7.14 |
| P61619 | Protein<br>transport<br>protein Sec61<br>subunit alpha<br>isoform 1<br>OS=Homo<br>sapiens<br>GN=SEC61A1<br>PE=1 SV=2 -<br>[S61A1_HUMAN<br>] | 12.18 | 2 | 7  | 7  | 48  | 0.648 | 0.683 | 0.730 | 0.761 | 102.14 | 12.18 | 13 | 48  | 476  | 52.2  | 8.06 |
| Q13492 | Phosphatidylo<br>sitol-binding<br>cathrin<br>assembly<br>protein<br>OS=Homo<br>sapiens<br>GN=PICALM<br>PE=1 SV=2 -<br>[PICAL_HUMAN]         | 31.44 | 1 | 17 | 18 | 96  | 0.886 | 0.749 | 0.822 | 0.762 | 214.48 | 31.44 | 28 | 96  | 652  | 70.7  | 7.90 |

|        |                                                                                                                                    |       |   |    |    |    |       |       |       |       |        |       |    |    |      |       |      |
|--------|------------------------------------------------------------------------------------------------------------------------------------|-------|---|----|----|----|-------|-------|-------|-------|--------|-------|----|----|------|-------|------|
| Q5ST30 | Valine--tRNA<br>ligase,<br>mitochondrial<br>OS=Homo<br>sapiens<br>GN=VAR52<br>PE=1 SV=2 -<br>[SYVM_HUMAN]                          | 5.27  | 1 | 4  | 4  | 4  | 0.582 | 1.752 | 0.860 | 0.762 | 10.84  | 5.27  | 4  | 4  | 1063 | 118.4 | 7.02 |
| O95671 | N-<br>acetylserotonin<br>O-<br>methyltransfer<br>ase-like protein<br>OS=Homo<br>sapiens<br>GN=ASMTL<br>PE=1 SV=3 -<br>[ASML_HUMAN] | 23.83 | 1 | 12 | 12 | 37 | 0.652 | 0.605 | 0.827 | 0.762 | 101.86 | 23.83 | 19 | 37 | 621  | 68.8  | 6.07 |
| A9UHW6 | MIF4G domain-<br>containing<br>protein<br>OS=Homo<br>sapiens<br>GN=MIF4GD<br>PE=1 SV=1 -<br>[MI4GD_HUMAN<br>]                      | 12.61 | 1 | 2  | 3  | 5  | 0.873 | 1.022 | 1.240 | 0.762 | 10.40  | 12.61 | 4  | 5  | 222  | 25.4  | 5.33 |
| Q9NW70 | Exocyst complex<br>component 1<br>OS=Homo<br>sapiens<br>GN=EXOC1<br>PE=1 SV=4 -<br>[EXOC1_HUMA<br>N]                               | 31.10 | 1 | 22 | 22 | 56 | 1.019 | 0.838 | 0.963 | 0.762 | 155.13 | 31.10 | 33 | 56 | 894  | 101.9 | 6.61 |
| Q9BQA1 | Methylosome<br>protein 50<br>OS=Homo<br>sapiens<br>GN=WDR77<br>PE=1 SV=1 -<br>[MEP50_HUMA<br>N]                                    | 17.25 | 1 | 5  | 5  | 7  | 0.729 | 1.147 | 1.255 | 0.762 | 13.54  | 17.25 | 7  | 7  | 342  | 36.7  | 5.17 |
| Q6FIF0 | AN1-type zinc<br>finger protein<br>6 OS=Homo<br>sapiens<br>GN=ZFAND6<br>PE=1 SV=2 -<br>[ZFANG_HUMAN<br>]                           | 4.33  | 1 | 1  | 1  | 2  | 0.496 | 1.018 | 0.891 | 0.762 | 4.40   | 4.33  | 2  | 2  | 208  | 22.5  | 7.20 |
| Q9UBM7 | 7-<br>dehydrocholest<br>erol reductase<br>OS=Homo<br>sapiens<br>GN=DHCR7<br>PE=1 SV=1 -<br>[DHCR7_HUMAN<br>]                       | 6.11  | 1 | 3  | 3  | 11 | 0.990 | 0.574 | 1.041 | 0.762 | 23.86  | 6.11  | 6  | 11 | 475  | 54.5  | 8.70 |
| P11230 | Acetylcholine<br>receptor<br>subunit beta<br>OS=Homo<br>sapiens<br>GN=CHRB1<br>PE=1 SV=3 -<br>[ACHB_HUMAN]                         | 1.20  | 1 | 1  | 1  | 2  | 0.682 | 0.665 | 0.378 | 0.763 | 4.82   | 1.20  | 1  | 2  | 501  | 56.7  | 5.81 |
| Q7L576 | Cytoplasmic<br>FMR1-<br>interacting<br>protein 1<br>OS=Homo<br>sapiens<br>GN=CYFIP1<br>PE=1 SV=1 -<br>[CYFP1_HUMAN<br>]            | 24.42 | 1 | 14 | 25 | 65 | 0.982 | 0.868 | 0.922 | 0.763 | 158.29 | 24.42 | 39 | 65 | 1253 | 145.1 | 6.90 |

|        |                                                                                                                                  |       |   |    |    |     |       |       |       |       |         |       |    |     |     |       |      |
|--------|----------------------------------------------------------------------------------------------------------------------------------|-------|---|----|----|-----|-------|-------|-------|-------|---------|-------|----|-----|-----|-------|------|
| P24844 | Myosin<br>regulatory light<br>polypeptide 9<br>OS=Homo<br>sapiens<br>GN=MYL9<br>PE=1 SV=4 -<br>[MYL9_HUMAN]                      | 83.72 | 1 | 6  | 14 | 405 | 0.766 | 1.051 | 1.237 | 0.763 | 1016.80 | 83.72 | 23 | 405 | 172 | 19.8  | 4.92 |
| O95685 | Protein<br>phosphatase 1<br>regulatory<br>subunit 3D<br>OS=Homo<br>sapiens<br>GN=PPP1R3D<br>PE=1 SV=1 -<br>[PPR3D_HUMAN<br>]     | 4.68  | 1 | 1  | 1  | 2   | 0.801 | 0.959 | 0.966 | 0.763 | 3.53    | 4.68  | 2  | 2   | 299 | 32.5  | 8.07 |
| P18089 | Alpha-2B<br>adrenergic<br>receptor<br>OS=Homo<br>sapiens<br>GN=ADRA2B<br>PE=1 SV=3 -<br>[ADA2B_HUMAN<br>]                        | 3.13  | 1 | 1  | 1  | 21  | 1.047 | 1.031 | 0.909 | 0.763 | 55.56   | 3.13  | 1  | 21  | 447 | 49.5  | 8.73 |
| P51157 | Ras-related<br>protein Rab-28<br>OS=Homo<br>sapiens<br>GN=RAB28<br>PE=1 SV=2 -<br>[RAB28_HUMAN<br>]                              | 9.95  | 1 | 2  | 2  | 4   | 0.959 | 1.761 | 1.365 | 0.764 | 0.00    | 9.95  | 3  | 4   | 221 | 24.8  | 5.97 |
| P49023 | Paxillin<br>OS=Homo<br>sapiens<br>GN=PXN PE=1<br>SV=3 -<br>[PAXI_HUMAN]                                                          | 34.52 | 1 | 13 | 13 | 54  | 0.783 | 1.071 | 1.021 | 0.764 | 149.20  | 34.52 | 22 | 54  | 591 | 64.5  | 6.19 |
| O60784 | Target of Myb<br>protein 1<br>OS=Homo<br>sapiens<br>GN=TOM1<br>PE=1 SV=2 -<br>[TOM1_HUMAN<br>]                                   | 26.42 | 1 | 11 | 11 | 53  | 0.965 | 0.568 | 0.556 | 0.764 | 125.96  | 26.42 | 20 | 53  | 492 | 53.8  | 4.70 |
| O00222 | Metabotropic<br>glutamate<br>receptor 8<br>OS=Homo<br>sapiens<br>GN=GRM8<br>PE=2 SV=2 -<br>[GRM8_HUMAN]                          | 1.10  | 1 | 1  | 1  | 1   | 0.534 | 0.252 | 0.374 | 0.764 | 2.20    | 1.10  | 1  | 1   | 908 | 101.7 | 8.15 |
| Q99961 | Endophilin-A2<br>OS=Homo<br>sapiens<br>GN=SH3GL1<br>PE=1 SV=1 -<br>[SH3GL1_HUMAN<br>]                                            | 36.14 | 2 | 15 | 15 | 56  | 0.819 | 0.913 | 1.035 | 0.764 | 127.66  | 36.14 | 24 | 56  | 368 | 41.5  | 5.43 |
| A5PLN9 | Trafficking<br>protein partide<br>complex<br>subunit 13<br>OS=Homo<br>sapiens<br>GN=TRAPPC13<br>PE=1 SV=2 -<br>[TPC13_HUMAN<br>] | 10.55 | 1 | 4  | 4  | 9   | 0.853 | 0.938 | 1.029 | 0.765 | 13.36   | 10.55 | 7  | 9   | 417 | 46.5  | 5.60 |

|        |                                                                                                                  |       |   |    |    |     |       |       |       |       |        |       |    |     |     |       |      |
|--------|------------------------------------------------------------------------------------------------------------------|-------|---|----|----|-----|-------|-------|-------|-------|--------|-------|----|-----|-----|-------|------|
| Q5HYK7 | SH3 domain-containing protein 19<br>OS=Homo sapiens<br>GN=SH3D19<br>PE=1 SV=2 - [SH319_HUMAN]                    | 17.59 | 1 | 12 | 12 | 42  | 0.553 | 1.130 | 0.657 | 0.765 | 100.87 | 17.59 | 20 | 42  | 790 | 86.5  | 8.32 |
| Q96AA8 | Janus kinase and microtubule-interacting protein 2<br>OS=Homo sapiens<br>GN=JAKMIP2<br>PE=2 SV=1 - [JKIP2_HUMAN] | 1.11  | 1 | 1  | 1  | 1   | 0.697 | 0.410 | 0.616 | 0.765 | 2.11   | 1.11  | 1  | 1   | 810 | 94.9  | 6.16 |
| P30039 | Phenazine biosynthesis-like domain-containing protein<br>OS=Homo sapiens<br>GN=PBLD PE=1 SV=2 - [PBLD_HUMAN]     | 19.44 | 1 | 5  | 5  | 8   | 0.909 | 0.930 | 0.970 | 0.765 | 22.38  | 19.44 | 7  | 8   | 288 | 31.8  | 6.52 |
| Q9NVD7 | Alpha-parvin<br>OS=Homo sapiens<br>GN=PARVA<br>PE=1 SV=1 - [PARVA_HUMAN]                                         | 34.41 | 1 | 12 | 15 | 49  | 0.777 | 0.972 | 1.035 | 0.765 | 137.08 | 34.41 | 20 | 49  | 372 | 42.2  | 5.95 |
| Q9UHY1 | Nuclear receptor-binding protein<br>OS=Homo sapiens<br>GN=NRBP1<br>PE=1 SV=1 - [NRBP_HUMAN]                      | 15.70 | 1 | 7  | 7  | 13  | 0.672 | 0.662 | 0.822 | 0.765 | 33.97  | 15.70 | 10 | 13  | 535 | 59.8  | 5.08 |
| Q8IWA5 | Choline transporter-like protein 2<br>OS=Homo sapiens<br>GN=SLC44A2<br>PE=1 SV=3 - [CTL2_HUMAN]                  | 13.60 | 1 | 8  | 8  | 23  | 1.564 | 0.619 | 0.953 | 0.765 | 43.36  | 13.60 | 12 | 23  | 706 | 80.1  | 8.57 |
| P10746 | Uroporphyrinogen-III synthase<br>OS=Homo sapiens<br>GN=UROS<br>PE=1 SV=1 - [HEM4_HUMAN]                          | 16.98 | 1 | 3  | 3  | 8   | 0.895 | 1.037 | 1.194 | 0.765 | 22.20  | 16.98 | 5  | 8   | 265 | 28.6  | 5.48 |
| Q16401 | 26S proteasome non-ATPase regulatory subunit 5<br>OS=Homo sapiens<br>GN=PSMD5<br>PE=1 SV=3 - [PSMD5_HUMA]        | 40.48 | 1 | 14 | 14 | 56  | 0.929 | 0.701 | 0.707 | 0.766 | 169.04 | 40.48 | 22 | 56  | 504 | 56.2  | 5.48 |
| P15144 | Aminopeptidase N<br>OS=Homo sapiens<br>GN=ANPEP<br>PE=1 SV=4 - [AMPN_HUMAN]                                      | 27.92 | 1 | 30 | 30 | 136 | 0.476 | 1.349 | 1.069 | 0.766 | 310.03 | 27.92 | 49 | 136 | 967 | 109.5 | 5.48 |



|        |                                                                                                                          |       |   |    |    |     |       |       |       |       |        |       |    |     |      |       |      |
|--------|--------------------------------------------------------------------------------------------------------------------------|-------|---|----|----|-----|-------|-------|-------|-------|--------|-------|----|-----|------|-------|------|
| Q9HCE6 | Rho guanine nucleotide exchange factor 10-like protein<br>OS=Homo sapiens<br>GN=ARHGEF10L<br>PE=1 SV=3 - [ARGAL_HUMAN]   | 1.56  | 1 | 2  | 2  | 3   | 0.914 | 1.240 | 1.204 | 0.766 | 10.73  | 1.56  | 2  | 3   | 1279 | 140.3 | 5.88 |
| O96020 | G1/S-specific cyclin-E2<br>OS=Homo sapiens<br>GN=CCNE2<br>PE=1 SV=1 - [CCNE2_HUMAN]                                      | 8.17  | 1 | 2  | 2  | 4   | 0.823 | 1.039 | 0.915 | 0.766 | 5.30   | 8.17  | 2  | 4   | 404  | 46.7  | 7.83 |
| Q9NQ3  | Reticulon-4<br>OS=Homo sapiens<br>GN=RTN4<br>PE=1 SV=2 - [RTN4_HUMAN]                                                    | 9.65  | 1 | 9  | 9  | 141 | 1.012 | 0.778 | 0.877 | 0.766 | 431.13 | 9.65  | 14 | 141 | 1192 | 129.9 | 4.50 |
| P54289 | Voltage-dependent calcium channel subunit alpha-2/delta-1<br>OS=Homo sapiens<br>GN=CACNA2D1<br>PE=1 SV=3 - [CA2D1_HUMAN] | 21.85 | 1 | 23 | 23 | 68  | 1.525 | 0.705 | 0.852 | 0.766 | 155.67 | 21.85 | 37 | 68  | 1103 | 124.5 | 5.27 |
| Q13619 | Cullin-4A<br>OS=Homo sapiens<br>GN=CUL4A<br>PE=1 SV=3 - [CUL4A_HUMAN]                                                    | 20.55 | 1 | 8  | 19 | 45  | 0.831 | 0.772 | 0.809 | 0.766 | 86.87  | 20.55 | 29 | 45  | 759  | 87.6  | 8.13 |
| Q9HCM4 | Band 4.1-like protein 5<br>OS=Homo sapiens<br>GN=EPB41L5<br>PE=1 SV=3 - [E41L5_HUMAN]                                    | 1.64  | 1 | 1  | 1  | 4   | 0.635 | 1.440 | 1.606 | 0.767 | 5.90   | 1.64  | 2  | 4   | 733  | 81.8  | 6.58 |
| P49841 | Glycogen synthase kinase-3 beta<br>OS=Homo sapiens<br>GN=GSK3B<br>PE=1 SV=2 - [GSK3B_HUMAN]                              | 24.76 | 1 | 4  | 8  | 33  | 0.884 | 0.739 | 0.986 | 0.767 | 65.26  | 24.76 | 13 | 33  | 420  | 46.7  | 8.78 |
| P54274 | Telomeric repeat-binding factor 1<br>OS=Homo sapiens<br>GN=TERF1<br>PE=1 SV=3 - [TERF1_HUMAN]                            | 8.43  | 2 | 2  | 3  | 3   | 1.015 | 0.945 | 1.067 | 0.767 | 6.81   | 8.43  | 3  | 3   | 439  | 50.2  | 6.37 |
| P43630 | Killer cell immunoglobulin-like receptor 3DL2<br>OS=Homo sapiens<br>GN=KIR3DL2<br>PE=2 SV=1 - [KI3L2_HUMAN]              | 3.74  | 1 | 1  | 1  | 1   | 0.600 | 1.145 | 1.616 | 0.767 | 2.70   | 3.74  | 1  | 1   | 455  | 50.2  | 8.46 |

|        |                                                                                                                               |       |   |    |    |     |       |       |       |       |         |       |    |     |     |       |       |
|--------|-------------------------------------------------------------------------------------------------------------------------------|-------|---|----|----|-----|-------|-------|-------|-------|---------|-------|----|-----|-----|-------|-------|
| Q96EM0 | Trans-L-3-hydroxyproline dehydratase<br>OS=Homo sapiens<br>GN=L3HYPDH<br>PE=1 SV=2 - [T3HPD_HUMAN]                            | 29.66 | 1 | 7  | 7  | 16  | 0.977 | 0.469 | 0.756 | 0.768 | 46.36   | 29.66 | 9  | 16  | 354 | 38.1  | 6.68  |
| P15954 | Cytochrome c oxidase subunit 7C, mitochondrial<br>OS=Homo sapiens<br>GN=COX7C<br>PE=1 SV=1 - [COX7C_HUMAN]                    | 23.81 | 2 | 1  | 2  | 4   | 0.637 | 0.569 | 0.551 | 0.768 | 8.81    | 23.81 | 3  | 4   | 63  | 7.2   | 10.27 |
| Q96MW7 | Tigger transposable element-derived protein 1<br>OS=Homo sapiens<br>GN=TIGD1<br>PE=1 SV=1 - [TIGD1_HUMAN]                     | 3.38  | 1 | 2  | 2  | 2   | 0.741 | 0.949 | 1.139 | 0.768 | 5.78    | 3.38  | 2  | 2   | 591 | 67.3  | 8.46  |
| O43252 | Bifunctional 3'-phosphoadenosine 5'-phosphosulfate synthase 1<br>OS=Homo sapiens<br>GN=PAPSS1<br>PE=1 SV=2 - [PAPS1_HUMAN]    | 36.06 | 1 | 16 | 18 | 75  | 0.817 | 0.973 | 1.116 | 0.768 | 163.61  | 36.06 | 27 | 75  | 624 | 70.8  | 6.86  |
| Q9UNA0 | A disintegrin and metalloproteinase with thrombospondin motifs 5<br>OS=Homo sapiens<br>GN=ADAMTS5<br>PE=1 SV=2 - [ATS5_HUMAN] | 1.29  | 1 | 1  | 1  | 1   | 0.479 | 0.943 | 1.079 | 0.768 | 0.00    | 1.29  | 1  | 1   | 930 | 101.7 | 8.85  |
| P61586 | Transforming protein RhoA<br>OS=Homo sapiens<br>GN=RHOA<br>PE=1 SV=1 - [RHOA_HUMAN]                                           | 60.10 | 2 | 10 | 11 | 82  | 1.214 | 1.091 | 1.047 | 0.768 | 196.43  | 60.10 | 19 | 82  | 193 | 21.8  | 6.10  |
| P04792 | Heat shock protein beta-1<br>OS=Homo sapiens<br>GN=HSPB1<br>PE=1 SV=2 - [HSPB1_HUMAN]                                         | 65.85 | 1 | 15 | 15 | 496 | 0.745 | 0.995 | 1.307 | 0.768 | 1267.86 | 65.85 | 26 | 496 | 205 | 22.8  | 6.40  |
| P00558 | Phosphoglycerate kinase 1<br>OS=Homo sapiens<br>GN=PGK1<br>PE=1 SV=3 - [PGK1_HUMAN]                                           | 87.05 | 1 | 40 | 40 | 788 | 1.193 | 1.123 | 0.944 | 0.768 | 1894.68 | 87.05 | 71 | 788 | 417 | 44.6  | 8.10  |

|        |                                                                                                                                                                                            |       |   |    |    |     |       |       |       |       |        |       |    |     |      |       |      |
|--------|--------------------------------------------------------------------------------------------------------------------------------------------------------------------------------------------|-------|---|----|----|-----|-------|-------|-------|-------|--------|-------|----|-----|------|-------|------|
| O75044 | SLIT-ROBO<br>Rho GTPase-<br>activating<br>protein 2<br>OS=Homo<br>sapiens<br>GN=SRGAP2<br>PE=1 SV=2 -<br>[SRGP2_HUMAN<br>]<br>Putative ATP-<br>dependent<br>RNA helicase<br>TDRD12         | 11.48 | 2 | 5  | 11 | 23  | 0.944 | 0.787 | 0.778 | 0.769 | 58.49  | 11.48 | 15 | 23  | 1071 | 120.8 | 6.70 |
| Q587J7 | OS=Homo<br>sapiens<br>GN=TDRD12<br>PE=2 SV=2 -<br>[TDR12_HUMAN<br>]<br>Eukaryotic<br>translation<br>initiation factor<br>4E-binding<br>protein 1                                           | 2.29  | 1 | 2  | 2  | 6   | 0.423 | 0.992 | 0.982 | 0.769 | 17.20  | 2.29  | 2  | 6   | 1177 | 132.5 | 6.74 |
| Q13541 | OS=Homo<br>sapiens<br>GN=EIF4EBP1<br>PE=1 SV=3 -<br>[4EBP1_HUMAN<br>]<br>Kinesin-1 heavy<br>chain                                                                                          | 22.03 | 1 | 1  | 1  | 4   | 0.848 | 1.975 | 1.247 | 0.769 | 17.92  | 22.03 | 2  | 4   | 118  | 12.6  | 5.48 |
| P33176 | OS=Homo<br>sapiens<br>GN=KIF5B<br>PE=1 SV=1 -<br>[KINH_HUMAN]                                                                                                                              | 55.66 | 2 | 49 | 57 | 304 | 0.969 | 0.924 | 1.037 | 0.769 | 829.55 | 55.66 | 90 | 304 | 963  | 109.6 | 6.51 |
| Q86VW2 | Rho guanine<br>nucleotide<br>exchange<br>factor 25<br>OS=Homo<br>sapiens<br>GN=ARHGEF25<br>PE=1 SV=2 -<br>[ARHGP_HUMAN<br>]<br>Signal<br>transducer and<br>activator of<br>transcription 6 | 1.03  | 1 | 1  | 1  | 1   | 0.857 | 1.071 | 1.061 | 0.769 | 1.72   | 1.03  | 1  | 1   | 580  | 63.8  | 6.61 |
| P42226 | OS=Homo<br>sapiens<br>GN=STAT6<br>PE=1 SV=1 -<br>[STAT6_HUMAN<br>]<br>Endophilin-B1                                                                                                        | 21.25 | 1 | 17 | 17 | 49  | 1.006 | 1.282 | 1.076 | 0.769 | 119.51 | 21.25 | 27 | 49  | 847  | 94.1  | 6.23 |
| Q9Y371 | OS=Homo<br>sapiens<br>GN=SH3GLB1<br>PE=1 SV=1 -<br>[SHLB1_HUMAN<br>]<br>Coiled-coil<br>domain-<br>containing<br>protein 168                                                                | 25.75 | 2 | 11 | 12 | 56  | 0.799 | 0.979 | 1.040 | 0.769 | 113.80 | 25.75 | 20 | 56  | 365  | 40.8  | 6.04 |
| Q8NDH2 | OS=Homo<br>sapiens<br>GN=CCDC168<br>PE=2 SV=2 -<br>[CC168_HUMAN<br>]                                                                                                                       | 2.24  | 1 | 4  | 5  | 5   | 0.624 | 1.263 | 1.143 | 0.769 | 9.65   | 2.24  | 5  | 5   | 2452 | 277.8 | 9.31 |

|        |                                                                                                                    |       |   |   |   |    |       |       |       |       |       |       |    |    |      |       |      |
|--------|--------------------------------------------------------------------------------------------------------------------|-------|---|---|---|----|-------|-------|-------|-------|-------|-------|----|----|------|-------|------|
| Q9NP79 | Vacuolar protein sorting-associated protein VTA1 homolog<br>OS=Homo sapiens<br>GN=VTA1<br>PE=1 SV=1 - [VTA1_HUMAN] | 26.71 | 1 | 8 | 8 | 20 | 0.796 | 0.571 | 0.773 | 0.769 | 50.86 | 26.71 | 11 | 20 | 307  | 33.9  | 6.29 |
| Q9NYL4 | Peptidyl-prolyl isomerase FKBP11<br>OS=Homo sapiens<br>GN=FKBP11<br>PE=1 SV=1 - [FKBP11_HUMAN]                     | 23.38 | 1 | 5 | 5 | 14 | 0.540 | 0.579 | 0.424 | 0.770 | 28.71 | 23.38 | 8  | 14 | 201  | 22.2  | 9.39 |
| Q14012 | Calcium/calmodulin-dependent protein kinase type 1<br>OS=Homo sapiens<br>GN=CAMK1<br>PE=1 SV=1 - [KCC1A_HUMAN]     | 25.14 | 1 | 6 | 8 | 21 | 0.970 | 1.044 | 1.191 | 0.770 | 47.21 | 25.14 | 15 | 21 | 370  | 41.3  | 5.29 |
| Q5W0V3 | Protein FAM160B1<br>OS=Homo sapiens<br>GN=FAM160B1<br>PE=2 SV=1 - [F16B1_HUMAN]                                    | 6.67  | 1 | 5 | 5 | 11 | 0.698 | 0.717 | 0.662 | 0.770 | 21.80 | 6.67  | 8  | 11 | 765  | 86.5  | 5.29 |
| Q8NDA2 | Hemicentin-2<br>OS=Homo sapiens<br>GN=HMCN2<br>PE=2 SV=2 - [HMCN2_HUMAN]                                           | 0.53  | 1 | 2 | 2 | 5  | 0.685 | 0.852 | 0.807 | 0.770 | 2.17  | 0.53  | 2  | 5  | 5065 | 542.3 | 5.83 |
| Q6ZRG5 | Putative uncharacterized protein FLJ43944<br>OS=Homo sapiens<br>PE=5 SV=1 - [YQ015_HUMAN]                          | 5.88  | 1 | 1 | 1 | 1  | 0.972 | 1.657 | 1.414 | 0.770 | 2.16  | 5.88  | 1  | 1  | 221  | 24.1  | 4.41 |
| Q8WUH1 | Protein Churchill<br>OS=Homo sapiens<br>GN=CHURC1<br>PE=1 SV=2 - [CHUR_HUMAN]                                      | 9.35  | 1 | 1 | 1 | 5  | 0.723 | 1.069 | 0.912 | 0.770 | 10.70 | 9.35  | 2  | 5  | 139  | 16.1  | 5.54 |
| A6NDU8 | UPF0600 protein C5orf51<br>OS=Homo sapiens<br>GN=C5orf51<br>PE=1 SV=1 - [CE051_HUMAN]                              | 2.38  | 1 | 1 | 1 | 1  | 0.934 | 0.754 | 0.944 | 0.771 | 2.11  | 2.38  | 1  | 1  | 294  | 33.6  | 5.26 |
| Q9Y5Y5 | Peroxisomal membrane protein PEX16<br>OS=Homo sapiens<br>GN=PEX16<br>PE=1 SV=2 - [PEX16_HUMAN]                     | 10.12 | 1 | 3 | 3 | 10 | 0.855 | 0.537 | 0.913 | 0.771 | 20.90 | 10.12 | 5  | 10 | 336  | 38.6  | 9.85 |

|        |                                                                                                                             |       |   |    |    |     |       |       |       |       |         |       |    |     |      |       |      |
|--------|-----------------------------------------------------------------------------------------------------------------------------|-------|---|----|----|-----|-------|-------|-------|-------|---------|-------|----|-----|------|-------|------|
| P51649 | Succinate-semialdehyde dehydrogenase, mitochondrial<br>OS=Homo sapiens<br>GN=ALDH5A1<br>PE=1 SV=2 - [SSDH_HUMAN]            | 7.29  | 1 | 2  | 2  | 5   | 0.592 | 0.638 | 0.947 | 0.771 | 8.45    | 7.29  | 3  | 5   | 535  | 57.2  | 8.28 |
| P17661 | Desmin<br>OS=Homo sapiens<br>GN=DES PE=1 SV=3 - [DESM_HUMAN]                                                                | 68.30 | 3 | 25 | 32 | 957 | 0.650 | 8.452 | 2.594 | 0.771 | 1924.69 | 68.30 | 57 | 957 | 470  | 53.5  | 5.27 |
| Q3V6T2 | Girdin<br>OS=Homo sapiens<br>GN=CCDC88A<br>PE=1 SV=2 - [GRDN_HUMAN]                                                         | 12.61 | 4 | 19 | 24 | 54  | 0.821 | 1.519 | 1.027 | 0.771 | 109.78  | 12.61 | 33 | 54  | 1871 | 215.9 | 6.21 |
| A8MXV4 | Nucleoside diphosphate-linked moiety X motif 19, mitochondrial<br>OS=Homo sapiens<br>GN=NUDT19<br>PE=1 SV=1 - [NUD19_HUMAN] | 5.60  | 1 | 2  | 2  | 7   | 0.778 | 0.587 | 0.576 | 0.771 | 22.25   | 5.60  | 3  | 7   | 375  | 42.2  | 7.64 |
| Q9UMX0 | Ubiquilin-1<br>OS=Homo sapiens<br>GN=UBQLN1<br>PE=1 SV=2 - [UBQL1_HUMAN]                                                    | 17.66 | 1 | 3  | 9  | 45  | 0.494 | 0.973 | 0.741 | 0.771 | 135.35  | 17.66 | 15 | 45  | 589  | 62.5  | 5.11 |
| Q9H8M7 | Protein FAM188A<br>OS=Homo sapiens<br>GN=FAM188A<br>PE=1 SV=1 - [F188A_HUMAN]                                               | 8.31  | 1 | 3  | 3  | 7   | 0.878 | 0.959 | 1.167 | 0.771 | 16.35   | 8.31  | 5  | 7   | 445  | 49.7  | 4.77 |
| Q8TES7 | Fas-binding factor 1<br>OS=Homo sapiens<br>GN=FBF1<br>PE=1 SV=2 - [FBF1_HUMAN]                                              | 3.27  | 8 | 2  | 3  | 6   | 0.952 | 0.717 | 0.825 | 0.771 | 7.90    | 3.27  | 3  | 6   | 1133 | 125.4 | 7.08 |
| Q5MNZ6 | WD repeat domain phosphoinositide-interacting protein 3<br>OS=Homo sapiens<br>GN=WDR45B<br>PE=2 SV=2 - [WIPI3_HUMAN]        | 4.94  | 1 | 1  | 2  | 2   | 0.967 | 0.872 | 1.048 | 0.771 | 2.38    | 4.94  | 2  | 2   | 344  | 38.1  | 7.59 |
| O60701 | UDP-glucose 6-dehydrogenase<br>OS=Homo sapiens<br>GN=UGDH<br>PE=1 SV=1 - [UGDH_HUMAN]                                       | 63.16 | 1 | 29 | 29 | 251 | 0.855 | 0.757 | 1.018 | 0.771 | 589.40  | 63.16 | 48 | 251 | 494  | 55.0  | 7.12 |

|        |                                                                                                                                                |       |   |    |    |    |       |       |       |       |        |       |    |    |      |       |      |
|--------|------------------------------------------------------------------------------------------------------------------------------------------------|-------|---|----|----|----|-------|-------|-------|-------|--------|-------|----|----|------|-------|------|
| Q4LE39 | AT-rich<br>interactive<br>domain-<br>containing<br>protein 4B<br>OS=Homo<br>sapiens<br>GN=ARID4B<br>PE=1 SV=2 -<br>[ARI4B_HUMAN<br>]           | 0.61  | 1 | 1  | 1  | 4  | 0.773 | 0.643 | 0.684 | 0.772 | 6.57   | 0.61  | 2  | 4  | 1312 | 147.7 | 5.12 |
| Q8WTS6 | Histone-lysine N-<br>methyltransfer<br>ase SETD7<br>OS=Homo<br>sapiens<br>GN=SETD7<br>PE=1 SV=1 -<br>[SETD7_HUMAN<br>]                         | 23.50 | 1 | 7  | 7  | 24 | 0.776 | 1.264 | 0.964 | 0.772 | 71.03  | 23.50 | 12 | 24 | 366  | 40.7  | 4.63 |
| Q6NT32 | Carboxylesteras<br>e 5A<br>OS=Homo<br>sapiens<br>GN=CESSA<br>PE=2 SV=1 -<br>[EST5A_HUMAN<br>]                                                  | 9.57  | 1 | 1  | 2  | 2  | 1.100 | 0.613 | 0.770 | 0.772 | 2.30   | 9.57  | 2  | 2  | 575  | 63.9  | 6.44 |
| Q9BW71 | HIRA-<br>interacting<br>protein 3<br>OS=Homo<br>sapiens<br>GN=HIRP3<br>PE=1 SV=3 -<br>[HIRP3_HUMAN<br>]                                        | 3.42  | 1 | 2  | 2  | 3  | 0.956 | 0.907 | 1.013 | 0.772 | 4.88   | 3.42  | 2  | 3  | 556  | 61.9  | 8.54 |
| O60504 | Vinexin<br>OS=Homo<br>sapiens<br>GN=SORBS3<br>PE=1 SV=2 -<br>[VINEX_HUMAN<br>]                                                                 | 19.08 | 1 | 14 | 14 | 71 | 1.094 | 1.166 | 1.159 | 0.772 | 160.95 | 19.08 | 26 | 71 | 671  | 75.3  | 9.45 |
| Q71F56 | Mediator of<br>RNA<br>polymerase II<br>transcription<br>subunit 13-like<br>OS=Homo<br>sapiens<br>GN=MED13L<br>PE=1 SV=1 -<br>[MD13L_HUMAN<br>] | 0.32  | 1 | 1  | 1  | 1  | 0.894 | 1.120 | 0.773 | 0.772 | 1.69   | 0.32  | 1  | 1  | 2210 | 242.4 | 6.04 |
| Q5JVS0 | Intracellular<br>hyaluronan-<br>binding protein<br>4 OS=Homo<br>sapiens<br>GN=HABP4<br>PE=1 SV=1 -<br>[HABP4_HUMAN<br>]                        | 19.13 | 1 | 6  | 6  | 17 | 1.136 | 1.519 | 1.191 | 0.772 | 42.71  | 19.13 | 9  | 17 | 413  | 45.8  | 7.46 |
| Q9NRZ9 | Lymphoid-<br>specific helicase<br>OS=Homo<br>sapiens<br>GN=HELLS<br>PE=1 SV=1 -<br>[HELLS_HUMAN]                                               | 5.01  | 1 | 2  | 2  | 24 | 1.622 | 1.218 | 1.226 | 0.773 | 35.82  | 5.01  | 2  | 24 | 838  | 97.0  | 7.93 |

|        |                                                                                                                         |       |    |    |    |    |       |       |       |       |        |       |    |     |      |      |      |
|--------|-------------------------------------------------------------------------------------------------------------------------|-------|----|----|----|----|-------|-------|-------|-------|--------|-------|----|-----|------|------|------|
| Q8IV35 | WD repeat-containing protein 49<br>OS=Homo sapiens<br>GN=WDR49<br>PE=2 SV=1 - [WDR49_HUMAN]                             | 0.86  | 1  | 1  | 1  | 2  | 0.935 | 1.302 | 0.773 | 6.90  | 0.86   | 1     | 2  | 697 | 79.2 | 8.47 |      |
| Q8TB69 | Zinc finger protein 519<br>OS=Homo sapiens<br>GN=ZNF519<br>PE=2 SV=2 - [ZNF519_HUMAN]                                   | 4.63  | 96 | 1  | 3  | 6  | 1.133 | 0.756 | 0.789 | 0.773 | 6.32   | 4.63  | 4  | 6   | 540  | 63.0 | 9.36 |
| Q9BW60 | Elongation of very long chain fatty acids protein 1<br>OS=Homo sapiens<br>GN=ELOVL1<br>PE=1 SV=1 - [ELOVL1_HUMAN]       | 4.30  | 1  | 1  | 1  | 27 | 0.855 | 0.814 | 1.205 | 0.773 | 41.96  | 4.30  | 2  | 27  | 279  | 32.6 | 9.60 |
| P36507 | Dual specificity mitogen-activated protein kinase kinase 2<br>OS=Homo sapiens<br>GN=MAP2K2<br>PE=1 SV=1 - [MP2K2_HUMAN] | 23.75 | 1  | 6  | 11 | 47 | 1.001 | 0.851 | 0.974 | 0.773 | 102.65 | 23.75 | 19 | 47  | 400  | 44.4 | 6.55 |
| Q9BQ24 | Zinc finger FYVE domain-containing protein 21<br>OS=Homo sapiens<br>GN=ZFYVE21<br>PE=1 SV=1 - [ZFY21_HUMAN]             | 9.83  | 1  | 2  | 3  | 7  | 0.897 | 0.757 | 1.006 | 0.773 | 12.88  | 9.83  | 4  | 7   | 234  | 26.5 | 8.41 |
| Q9BRK5 | 45 kDa calcium-binding protein<br>OS=Homo sapiens<br>GN=SDF4<br>PE=1 SV=1 - [CAB45_HUMAN]                               | 38.12 | 1  | 10 | 11 | 59 | 0.803 | 0.873 | 0.838 | 0.773 | 179.48 | 38.12 | 16 | 59  | 362  | 41.8 | 4.86 |
| Q9UNE0 | Tumor necrosis factor receptor superfamily member EDAR<br>OS=Homo sapiens<br>GN=EDAR<br>PE=1 SV=1 - [EDAR_HUMAN]        | 1.34  | 1  | 1  | 1  | 3  | 0.587 | 1.907 | 1.040 | 0.773 | 6.55   | 1.34  | 1  | 3   | 448  | 48.6 | 5.17 |
| O00305 | Voltage-dependent L-type calcium channel subunit beta-4<br>OS=Homo sapiens<br>GN=CACNB4<br>PE=1 SV=2 - [CACB4_HUMAN]    | 9.81  | 3  | 2  | 3  | 6  | 1.426 | 1.033 | 0.771 | 0.773 | 9.42   | 9.81  | 4  | 6   | 520  | 58.1 | 9.32 |

|        |                                                                                                            |       |   |   |   |    |       |       |       |       |        |       |    |    |      |       |      |
|--------|------------------------------------------------------------------------------------------------------------|-------|---|---|---|----|-------|-------|-------|-------|--------|-------|----|----|------|-------|------|
| Q6NUN9 | Zinc finger protein 746<br>OS=Homo sapiens<br>GN=ZNF746<br>PE=1 SV=1 - [ZNF746_HUMAN]                      | 8.54  | 3 | 3 | 3 | 3  | 0.860 | 0.923 | 1.088 | 0.773 | 6.67   | 8.54  | 3  | 3  | 644  | 69.1  | 6.86 |
| P53582 | Methionine aminopeptidase 1<br>OS=Homo sapiens<br>GN=METAP1<br>PE=1 SV=2 - [MAP11_HUMAN]                   | 25.13 | 1 | 9 | 9 | 28 | 0.935 | 1.201 | 1.280 | 0.773 | 61.92  | 25.13 | 15 | 28 | 386  | 43.2  | 7.17 |
| Q5HYI8 | Rab-like protein 3<br>OS=Homo sapiens<br>GN=RABL3<br>PE=1 SV=1 - [RABL3_HUMAN]                             | 9.75  | 1 | 2 | 2 | 6  | 0.870 | 0.629 | 0.650 | 0.774 | 17.70  | 9.75  | 2  | 6  | 236  | 26.4  | 7.11 |
| O00233 | 26S proteasome non-ATPase regulatory subunit 9<br>OS=Homo sapiens<br>GN=PSMD9<br>PE=1 SV=3 - [PSMD9_HUMAN] | 35.87 | 1 | 8 | 9 | 44 | 1.002 | 1.087 | 1.122 | 0.774 | 103.09 | 35.87 | 15 | 44 | 223  | 24.7  | 6.95 |
| Q9UHV9 | Prefoldin subunit 2<br>OS=Homo sapiens<br>GN=PFDN2<br>PE=1 SV=1 - [PFD2_HUMAN]                             | 40.91 | 1 | 6 | 6 | 20 | 0.802 | 1.051 | 0.910 | 0.774 | 48.47  | 40.91 | 9  | 20 | 154  | 16.6  | 6.58 |
| Q86UX2 | Inter-alpha-trypsin inhibitor heavy chain H5<br>OS=Homo sapiens<br>GN=ITIHS<br>PE=2 SV=2 - [ITIHS_HUMAN]   | 0.64  | 1 | 1 | 1 | 1  | 0.854 | 1.013 | 1.057 | 0.774 | 2.24   | 0.64  | 1  | 1  | 942  | 104.5 | 8.28 |
| P24387 | Corticotropin-releasing factor-binding protein<br>OS=Homo sapiens<br>GN=CRHBP<br>PE=1 SV=2 - [CRHBP_HUMAN] | 6.21  | 1 | 2 | 2 | 2  | 0.745 | 0.977 | 0.864 | 0.774 | 4.90   | 6.21  | 2  | 2  | 322  | 36.1  | 6.52 |
| Q5T0Z8 | Uncharacterized protein C6orf132<br>OS=Homo sapiens<br>GN=C6orf132<br>PE=1 SV=4 - [CF132_HUMAN]            | 0.93  | 1 | 1 | 1 | 1  | 0.868 | 0.854 | 0.941 | 0.774 | 0.00   | 0.93  | 1  | 1  | 1188 | 124.0 | 9.45 |
| Q92692 | Nectin-2<br>OS=Homo sapiens<br>GN=PVRL2<br>PE=1 SV=1 - [PVRL2_HUMAN]                                       | 9.29  | 1 | 4 | 4 | 13 | 1.502 | 0.927 | 1.064 | 0.774 | 22.88  | 9.29  | 8  | 13 | 538  | 57.7  | 4.82 |



|        |                                                                                                                                                |       |   |    |    |     |       |       |       |       |        |       |    |     |      |       |      |
|--------|------------------------------------------------------------------------------------------------------------------------------------------------|-------|---|----|----|-----|-------|-------|-------|-------|--------|-------|----|-----|------|-------|------|
| Q99614 | Tetratricopeptide repeat protein 1<br>OS=Homo sapiens<br>GN=TTC1<br>PE=1 SV=1 - [TTC1_HUMAN]<br>UDP-glucose:glycoprotein glucosyltransferase 2 | 39.38 | 1 | 11 | 11 | 28  | 0.878 | 1.074 | 1.039 | 0.774 | 75.72  | 39.38 | 15 | 28  | 292  | 33.5  | 4.84 |
| Q9NYU1 | OS=Homo sapiens<br>GN=UGGT2<br>PE=1 SV=4 - [UGGT2_HUMAN]<br>Phosphofurin adduct sorting protein 2                                              | 14.78 | 1 | 20 | 21 | 69  | 0.835 | 0.548 | 0.682 | 0.774 | 163.09 | 14.78 | 36 | 69  | 1516 | 174.6 | 6.89 |
| Q86VP3 | OS=Homo sapiens<br>GN=PACS2<br>PE=1 SV=3 - [PACS2_HUMAN]<br>E3 ubiquitin-protein ligase Itchy homolog                                          | 3.15  | 1 | 3  | 3  | 6   | 0.852 | 0.610 | 0.716 | 0.775 | 7.05   | 3.15  | 4  | 6   | 889  | 97.6  | 6.60 |
| Q96J02 | OS=Homo sapiens<br>GN=ITCH PE=1 SV=2 - [ITCH_HUMAN]<br>Protein LSM12 homolog                                                                   | 11.18 | 2 | 7  | 7  | 12  | 0.673 | 1.036 | 1.151 | 0.775 | 33.46  | 11.18 | 10 | 12  | 903  | 102.7 | 6.30 |
| Q3MHD2 | OS=Homo sapiens<br>GN=LSM12<br>PE=1 SV=2 - [LSM12_HUMAN]<br>Geranylgeranyl transferase type-2 subunit beta                                     | 13.85 | 1 | 2  | 2  | 3   | 0.991 | 1.192 | 0.672 | 0.775 | 8.27   | 13.85 | 3  | 3   | 195  | 21.7  | 7.74 |
| P53611 | OS=Homo sapiens<br>GN=RABGGTB<br>PE=1 SV=2 - [RABGGTB_HUMAN]<br>Eukaryotic translation initiation factor 5B                                    | 5.14  | 1 | 2  | 2  | 3   | 0.958 | 0.828 | 1.011 | 0.775 | 5.32   | 5.14  | 3  | 3   | 331  | 36.9  | 5.03 |
| O60841 | OS=Homo sapiens<br>GN=EIF5B<br>PE=1 SV=4 - [EIF5B_HUMAN]<br>Protein LBH                                                                        | 30.49 | 1 | 39 | 40 | 119 | 0.674 | 0.926 | 0.934 | 0.775 | 278.36 | 30.49 | 58 | 119 | 1220 | 138.7 | 5.49 |
| Q53QV2 | OS=Homo sapiens<br>GN=LBH PE=1 SV=1 - [LBH_HUMAN]<br>Geranylgeranyl pyrophosphate synthase                                                     | 38.10 | 1 | 3  | 3  | 9   | 0.664 | 0.706 | 2.328 | 0.775 | 34.26  | 38.10 | 4  | 9   | 105  | 12.2  | 4.41 |
| O95749 | OS=Homo sapiens<br>GN=GGPS1<br>PE=1 SV=1 - [GGPS1_HUMAN]                                                                                       | 18.00 | 1 | 5  | 5  | 17  | 0.943 | 1.126 | 1.100 | 0.775 | 35.58  | 18.00 | 8  | 17  | 300  | 34.8  | 6.14 |

|        |                                                                                                                                                |       |   |    |    |      |       |       |       |       |         |       |     |      |     |       |      |
|--------|------------------------------------------------------------------------------------------------------------------------------------------------|-------|---|----|----|------|-------|-------|-------|-------|---------|-------|-----|------|-----|-------|------|
| O43707 | Alpha-actinin-4<br>OS=Homo sapiens<br>GN=ACTN4<br>PE=1 SV=2 - [ACTN4_HUMAN]                                                                    | 77.28 | 1 | 52 | 76 | 2837 | 0.929 | 1.381 | 1.528 | 0.776 | 7260.34 | 77.28 | 131 | 2837 | 911 | 104.8 | 5.44 |
| Q8IXJ6 | NAD-dependent protein deacetylase<br>sirtuin-2<br>OS=Homo sapiens<br>GN=SIRT2<br>PE=1 SV=2 - [SIRT2_HUMAN]                                     | 4.88  | 1 | 2  | 2  | 4    | 0.907 | 1.087 | 1.094 | 0.776 | 16.01   | 4.88  | 2   | 4    | 389 | 43.2  | 5.36 |
| Q96A49 | Synapse-associated protein 1<br>OS=Homo sapiens<br>GN=SYAP1<br>PE=1 SV=1 - [SYAP1_HUMAN]                                                       | 28.98 | 1 | 13 | 13 | 36   | 0.902 | 0.824 | 0.875 | 0.776 | 63.30   | 28.98 | 19  | 36   | 352 | 39.9  | 4.53 |
| Q9Y5L0 | Transportin-3<br>OS=Homo sapiens<br>GN=TNPO3<br>PE=1 SV=3 - [TNPO3_HUMAN]                                                                      | 6.39  | 1 | 5  | 5  | 9    | 0.915 | 0.932 | 0.805 | 0.776 | 18.90   | 6.39  | 6   | 9    | 923 | 104.1 | 5.57 |
| Q9ULV4 | Coronin-1C<br>OS=Homo sapiens<br>GN=CORO1C<br>PE=1 SV=1 - [COR1C_HUMAN]                                                                        | 39.87 | 2 | 28 | 30 | 170  | 0.771 | 0.891 | 0.965 | 0.776 | 304.88  | 39.87 | 50  | 170  | 474 | 53.2  | 7.08 |
| P09668 | Pro-cathepsin H<br>OS=Homo sapiens<br>GN=CTSH<br>PE=1 SV=4 - [CATH_HUMAN]                                                                      | 6.57  | 1 | 2  | 2  | 2    | 0.884 | 0.781 | 0.873 | 0.777 | 2.98    | 6.57  | 2   | 2    | 335 | 37.4  | 8.07 |
| P63151 | Serine/threonine-protein phosphatase 2A 55 kDa regulatory subunit B alpha isoform<br>OS=Homo sapiens<br>GN=PPP2R2A<br>PE=1 SV=1 - [2ABA_HUMAN] | 30.65 | 4 | 11 | 11 | 36   | 1.085 | 1.057 | 1.035 | 0.777 | 91.22   | 30.65 | 16  | 36   | 447 | 51.7  | 6.20 |
| Q9GZT6 | Coiled-coil domain-containing protein 90B, mitochondrial<br>OS=Homo sapiens<br>GN=CCDC90B<br>PE=1 SV=2 - [CC90B_HUMAN]                         | 25.59 | 1 | 8  | 8  | 20   | 0.810 | 0.727 | 0.770 | 0.777 | 45.12   | 25.59 | 12  | 20   | 254 | 29.5  | 7.55 |
| P23560 | Brain-derived neurotrophic factor<br>OS=Homo sapiens<br>GN=BDNF<br>PE=1 SV=1 - [BDNF_HUMAN]                                                    | 4.45  | 1 | 1  | 1  | 2    | 0.796 | 0.632 | 0.958 | 0.777 | 2.84    | 4.45  | 2   | 2    | 247 | 27.8  | 8.79 |

|        |                                                                                                                                                                                                                                      |       |   |    |    |     |       |       |       |       |        |       |    |     |      |       |      |
|--------|--------------------------------------------------------------------------------------------------------------------------------------------------------------------------------------------------------------------------------------|-------|---|----|----|-----|-------|-------|-------|-------|--------|-------|----|-----|------|-------|------|
| B2RUZ4 | Small integral membrane protein 1<br>OS=Homo sapiens<br>GN=SMIM1<br>PE=1 SV=1 - [SMIM1_HUMAN]                                                                                                                                        | 20.51 | 1 | 1  | 1  | 1   | 1.650 | 1.632 | 2.622 | 0.778 | 4.88   | 20.51 | 1  | 1   | 78   | 8.7   | 9.03 |
| Q96Q35 | Amyotrophic lateral sclerosis 2 chromosomal region candidate gene 12<br>protein<br>OS=Homo sapiens<br>GN=ALS2CR12<br>PE=1 SV=2 - Heparan sulfate 2-O-sulfotransferase 1<br>OS=Homo sapiens<br>GN=HS2ST1<br>PE=1 SV=1 - [HS2ST_HUMAN] | 7.87  | 1 | 3  | 3  | 3   | 1.043 | 1.129 | 0.743 | 0.778 | 5.13   | 7.87  | 3  | 3   | 445  | 52.4  | 6.71 |
| Q7LGA3 | RILP-like protein 1<br>OS=Homo sapiens<br>GN=HS2ST1<br>PE=1 SV=1 - [HS2ST_HUMAN]                                                                                                                                                     | 26.69 | 1 | 8  | 8  | 15  | 0.843 | 0.883 | 0.736 | 0.778 | 34.87  | 26.69 | 10 | 15  | 356  | 41.9  | 8.69 |
| Q5EBL4 | RILP-like protein 1<br>OS=Homo sapiens<br>GN=RILPL1<br>PE=1 SV=1 - [RILPL1_HUMAN]                                                                                                                                                    | 30.02 | 2 | 10 | 11 | 37  | 0.781 | 0.879 | 1.064 | 0.778 | 90.76  | 30.02 | 17 | 37  | 403  | 47.1  | 5.21 |
| Q9BY32 | Inosine triphosphate pyrophosphatase<br>OS=Homo sapiens<br>GN=ITPA<br>PE=1 SV=2 - [ITPA_HUMAN]                                                                                                                                       | 19.59 | 1 | 3  | 3  | 6   | 0.743 | 0.983 | 0.972 | 0.778 | 15.23  | 19.59 | 4  | 6   | 194  | 21.4  | 5.66 |
| Q86VP6 | Cullin-associated NEDD8-dissociated protein 1<br>OS=Homo sapiens<br>GN=CAND1<br>PE=1 SV=2 - [CAND1_HUMAN]                                                                                                                            | 30.33 | 1 | 32 | 37 | 168 | 0.880 | 0.933 | 0.869 | 0.778 | 430.88 | 30.33 | 61 | 168 | 1230 | 136.3 | 5.78 |
| Q9UIV1 | CCR4-NOT transcription complex subunit 7<br>OS=Homo sapiens<br>GN=CNOT7<br>PE=1 SV=3 - [CNOT7_HUMAN]                                                                                                                                 | 8.77  | 1 | 2  | 2  | 7   | 0.778 | 0.889 | 0.558 | 0.778 | 25.94  | 8.77  | 3  | 7   | 285  | 32.7  | 4.84 |
| P39900 | Macrophage metalloelastase<br>OS=Homo sapiens<br>GN=MMP12<br>PE=1 SV=1 - [MMP12_HUMAN]                                                                                                                                               | 2.13  | 1 | 1  | 1  | 3   | 0.799 | 0.779 | 0.763 | 0.778 | 6.55   | 2.13  | 1  | 3   | 470  | 54.0  | 8.66 |

|        |                                                                                                                      |       |    |    |    |     |       |       |       |       |         |       |    |     |      |       |      |
|--------|----------------------------------------------------------------------------------------------------------------------|-------|----|----|----|-----|-------|-------|-------|-------|---------|-------|----|-----|------|-------|------|
| Q9BZF2 | Oxysterol-binding protein-related protein 7 OS=Homo sapiens<br>GN=OSBP17<br>PE=2 SV=1 - [OSBP17_HUMAN]               | 1.78  | 1  | 1  | 1  | 3   | 1.192 | 1.145 | 1.594 | 0.778 | 5.45    | 1.78  | 1  | 3   | 842  | 95.4  | 8.05 |
| Q9Y4X4 | Krueppel-like factor 12 OS=Homo sapiens<br>GN=KLF12<br>PE=1 SV=2 - [KLF12_HUMAN]                                     | 2.24  | 1  | 1  | 1  | 1   | 0.988 | 0.232 | 0.570 | 0.778 | 1.61    | 2.24  | 1  | 1   | 402  | 44.2  | 9.70 |
| Q02750 | Dual specificity mitogen-activated protein kinase kinase 1 OS=Homo sapiens<br>GN=MAP2K1<br>PE=1 SV=2 - [MP2K1_HUMAN] | 30.53 | 1  | 7  | 12 | 107 | 1.012 | 0.884 | 0.989 | 0.779 | 242.62  | 30.53 | 21 | 107 | 393  | 43.4  | 6.62 |
| Q13480 | GRB2-associated-binding protein 1 OS=Homo sapiens<br>GN=GAB1<br>PE=1 SV=2 - [GAB1_HUMAN]                             | 9.94  | 1  | 6  | 6  | 12  | 1.135 | 0.973 | 0.985 | 0.779 | 19.60   | 9.94  | 10 | 12  | 694  | 76.6  | 5.96 |
| Q9UII5 | Zinc finger protein 107 OS=Homo sapiens<br>GN=ZNF107<br>PE=2 SV=1 - [ZNF107_HUMAN]                                   | 15.71 | 94 | 1  | 2  | 6   | 1.009 | 0.974 | 1.071 | 0.779 | 0.00    | 15.71 | 2  | 6   | 783  | 90.6  | 9.31 |
| P07602 | Prosaposin OS=Homo sapiens<br>GN=PSAP<br>PE=1 SV=2 - [SAP_HUMAN]                                                     | 33.78 | 1  | 18 | 18 | 105 | 0.824 | 1.174 | 1.035 | 0.779 | 168.40  | 33.78 | 32 | 105 | 524  | 58.1  | 5.17 |
| Q96AY3 | Peptidyl-prolyl isomerase FKBP10 OS=Homo sapiens<br>GN=FKBP10<br>PE=1 SV=1 - [FKBP10_HUMAN]                          | 61.86 | 2  | 32 | 33 | 508 | 0.558 | 0.675 | 0.764 | 0.779 | 1370.08 | 61.86 | 54 | 508 | 582  | 64.2  | 5.62 |
| P11279 | Lysosome-associated membrane glycoprotein 1 OS=Homo sapiens<br>GN=LAMP1<br>PE=1 SV=3 - [LAMP1_HUMAN]                 | 4.80  | 1  | 2  | 2  | 61  | 0.813 | 0.831 | 0.808 | 0.779 | 124.72  | 4.80  | 4  | 61  | 417  | 44.9  | 8.75 |
| P04275 | von Willebrand factor OS=Homo sapiens<br>GN=VWF PE=1 SV=4 - [VWF_HUMAN]                                              | 2.03  | 1  | 2  | 3  | 4   | 1.224 | 1.113 | 1.419 | 0.779 | 7.17    | 2.03  | 3  | 4   | 2813 | 309.1 | 5.48 |

|        |                                                                                                              |       |   |   |    |    |       |       |       |       |        |       |    |    |      |       |      |
|--------|--------------------------------------------------------------------------------------------------------------|-------|---|---|----|----|-------|-------|-------|-------|--------|-------|----|----|------|-------|------|
| Q96JD6 | 1,5-anhydro-D-fructose reductase<br>OS=Homo sapiens<br>GN=AKR1E2<br>PE=1 SV=2 - [AKCL2_HUMAN]                | 1.88  | 1 | 1 | 1  | 2  | 1.099 | 0.665 | 0.676 | 0.779 | 3.63   | 1.88  | 1  | 2  | 320  | 36.6  | 7.49 |
| O60237 | Protein phosphatase 1 regulatory subunit 12B<br>OS=Homo sapiens<br>GN=PPP1R12B<br>PE=1 SV=2 - [MYPT2_HUMAN]  | 9.16  | 1 | 9 | 10 | 52 | 0.845 | 2.175 | 1.668 | 0.779 | 131.07 | 9.16  | 19 | 52 | 982  | 110.3 | 5.67 |
| Q5HYI7 | Metaxin-3<br>OS=Homo sapiens<br>GN=MTX3<br>PE=1 SV=2 - [MTX3_HUMAN]                                          | 8.65  | 1 | 3 | 3  | 8  | 1.070 | 0.782 | 0.678 | 0.779 | 15.87  | 8.65  | 5  | 8  | 312  | 35.1  | 7.80 |
| Q96T76 | MMS19 nucleotide excision repair protein homolog<br>OS=Homo sapiens<br>GN=MMS19<br>PE=1 SV=2 - [MMS19_HUMAN] | 9.22  | 2 | 8 | 9  | 18 | 0.786 | 0.736 | 1.029 | 0.779 | 48.38  | 9.22  | 13 | 18 | 1030 | 113.2 | 6.35 |
| Q8NEW0 | Zinc transporter 7<br>OS=Homo sapiens<br>GN=SLC30A7<br>PE=2 SV=1 - [ZNT7_HUMAN]                              | 3.99  | 1 | 1 | 1  | 8  | 0.735 | 0.690 | 0.617 | 0.780 | 12.90  | 3.99  | 1  | 8  | 376  | 41.6  | 6.95 |
| Q96GZ6 | Solute carrier family 41 member 3<br>OS=Homo sapiens<br>GN=SLC41A3<br>PE=2 SV=2 - [S41A3_HUMAN]              | 1.97  | 3 | 1 | 1  | 4  | 0.632 | 0.776 | 0.849 | 0.780 | 6.45   | 1.97  | 2  | 4  | 507  | 54.7  | 7.83 |
| Q8N0X7 | Spartin<br>OS=Homo sapiens<br>GN=SPG20<br>PE=1 SV=1 - [SPG20_HUMAN]                                          | 16.22 | 1 | 9 | 11 | 29 | 0.906 | 0.865 | 1.005 | 0.780 | 50.58  | 16.22 | 17 | 29 | 666  | 72.8  | 5.91 |
| Q5VWQ0 | Round spermatid basic protein 1<br>OS=Homo sapiens<br>GN=RSBN1<br>PE=1 SV=2 - [RSBN1_HUMAN]                  | 6.48  | 1 | 3 | 4  | 5  | 0.940 |       |       | 0.780 | 7.98   | 6.48  | 5  | 5  | 802  | 90.0  | 8.60 |
| O15260 | Surfeit locus protein 4<br>OS=Homo sapiens<br>GN=SURF4<br>PE=1 SV=3 - [SURF4_HUMAN]                          | 6.32  | 1 | 2 | 2  | 16 | 0.663 | 0.670 | 0.551 | 0.780 | 39.93  | 6.32  | 4  | 16 | 269  | 30.4  | 7.78 |

|        |                                                                                                                                                                           |       |   |    |    |    |       |       |       |       |       |       |    |    |      |       |      |
|--------|---------------------------------------------------------------------------------------------------------------------------------------------------------------------------|-------|---|----|----|----|-------|-------|-------|-------|-------|-------|----|----|------|-------|------|
| Q13643 | Four and a half LIM domains protein 3<br>OS=Homo sapiens<br>GN=FHL3 PE=1 SV=4 - [FHL3_HUMAN]<br>Protein FAM92B<br>OS=Homo sapiens<br>GN=FAM92B PE=2 SV=1 - [FAM92B_HUMAN] | 16.43 | 1 | 6  | 6  | 26 | 0.773 | 0.826 | 1.275 | 0.780 | 58.19 | 16.43 | 10 | 26 | 280  | 31.2  | 6.20 |
| Q6ZTR7 | Synaptosomal-associated protein 23<br>OS=Homo sapiens<br>GN=SNAP23 PE=1 SV=1 - [SNAP23_HUMAN]<br>Tuftelin<br>OS=Homo sapiens<br>GN=TUFT1 PE=2 SV=1 - [TUFT1_HUMAN]        | 6.91  | 1 | 2  | 2  | 4  | 0.675 | 1.077 | 1.119 | 0.780 | 9.63  | 6.91  | 2  | 4  | 304  | 34.8  | 8.66 |
| O00161 | Phosphatidylinositol 3,4,5-trisphosphate 3-phosphatase and dual-specificity protein phosphatase PTEN<br>OS=Homo sapiens<br>GN=PTEN PE=1 SV=1 - [PTEN_HUMAN]               | 40.28 | 1 | 9  | 9  | 41 | 0.951 | 0.836 | 0.821 | 0.780 | 96.34 | 40.28 | 15 | 41 | 211  | 23.3  | 5.01 |
| Q9NNX1 | Cydin-H<br>OS=Homo sapiens<br>GN=CCNH PE=1 SV=1 - [CCNH_HUMAN]                                                                                                            | 5.38  | 2 | 2  | 2  | 2  | 1.313 | 0.748 | 0.526 | 0.780 | 5.07  | 5.38  | 2  | 2  | 390  | 44.2  | 6.00 |
| P60484 | Biliverdin reductase A<br>OS=Homo sapiens<br>GN=BLVRA PE=1 SV=2 - [BLVRA_HUMAN]                                                                                           | 6.45  | 1 | 3  | 3  | 5  | 1.163 | 0.889 | 0.791 | 0.781 | 12.52 | 6.45  | 4  | 5  | 403  | 47.1  | 6.37 |
| P51946 | Cyclin-dependent kinase 12<br>OS=Homo sapiens<br>GN=CDK12 PE=1 SV=2 - [CDK12_HUMAN]                                                                                       | 8.05  | 1 | 2  | 2  | 3  | 0.902 | 1.006 | 0.920 | 0.781 | 5.69  | 8.05  | 2  | 3  | 323  | 37.6  | 7.15 |
| P53004 | Ceramide glucosyltransferase<br>OS=Homo sapiens<br>GN=UGCG PE=1 SV=1 - [UGCG_HUMAN]                                                                                       | 39.86 | 1 | 14 | 15 | 44 | 0.990 | 1.199 | 0.847 | 0.781 | 89.98 | 39.86 | 24 | 44 | 296  | 33.4  | 6.44 |
| Q9NYV4 |                                                                                                                                                                           | 3.15  | 6 | 2  | 4  | 14 | 0.861 | 0.942 | 0.900 | 0.781 | 28.36 | 3.15  | 5  | 14 | 1490 | 164.1 | 9.44 |
| Q16739 |                                                                                                                                                                           | 3.81  | 1 | 1  | 2  | 2  | 1.438 | 1.084 | 0.963 | 0.781 | 0.00  | 3.81  | 2  | 2  | 394  | 44.8  | 7.78 |

|        |                                                                                                                                                                                       |       |   |     |     |      |       |       |       |       |         |       |     |      |      |       |      |
|--------|---------------------------------------------------------------------------------------------------------------------------------------------------------------------------------------|-------|---|-----|-----|------|-------|-------|-------|-------|---------|-------|-----|------|------|-------|------|
| O95297 | Myelin protein zero-like protein 1<br>OS=Homo sapiens<br>GN=MPZL1<br>PE=1 SV=1 - [MPZL1_HUMAN<br>Laminin subunit alpha-4<br>OS=Homo sapiens<br>GN=LAMA4<br>PE=1 SV=4 - [LAMA4_HUMAN ] | 21.56 | 1 | 5   | 5   | 16   | 1.120 | 0.700 | 0.901 | 0.781 | 35.91   | 21.56 | 8   | 16   | 269  | 29.1  | 8.72 |
| Q16363 | Basigin<br>OS=Homo sapiens<br>GN=BSG PE=1 SV=2 - [BASI_HUMAN]                                                                                                                         | 28.57 | 1 | 9   | 9   | 92   | 0.978 | 0.833 | 0.880 | 0.781 | 231.87  | 28.57 | 15  | 92   | 385  | 42.2  | 5.66 |
| P52788 | Spermine synthase<br>OS=Homo sapiens<br>GN=SMS PE=1 SV=2 - [SPSY_HUMAN]                                                                                                               | 45.08 | 1 | 16  | 16  | 49   | 0.971 | 1.259 | 0.897 | 0.782 | 94.32   | 45.08 | 23  | 49   | 366  | 41.2  | 5.02 |
| Q13464 | Rho-associated protein kinase 1<br>OS=Homo sapiens<br>GN=ROCK1<br>PE=1 SV=1 - [ROCK1_HUMAN]                                                                                           | 28.73 | 1 | 34  | 39  | 110  | 0.857 | 1.498 | 1.406 | 0.782 | 229.17  | 28.73 | 62  | 110  | 1354 | 158.1 | 5.90 |
| P86790 | Vacuolar fusion protein CCZ1 homolog B<br>OS=Homo sapiens<br>GN=CCZ1B<br>PE=1 SV=1 - [CCZ1B_HUMAN ]                                                                                   | 15.77 | 1 | 7   | 7   | 28   | 0.674 | 0.769 | 0.510 | 0.782 | 29.72   | 15.77 | 9   | 28   | 482  | 55.8  | 6.48 |
| O75369 | Filamin-B<br>OS=Homo sapiens<br>GN=FLNB PE=1 SV=2 - [FLNB_HUMAN]                                                                                                                      | 59.38 | 1 | 123 | 137 | 1353 | 1.442 | 0.688 | 1.067 | 0.782 | 3235.99 | 59.38 | 230 | 1353 | 2602 | 278.0 | 5.73 |
| Q6XZF7 | Dynamin-binding protein<br>OS=Homo sapiens<br>GN=DNMBP<br>PE=1 SV=1 - [DNMBP_HUMAN]                                                                                                   | 9.89  | 1 | 15  | 15  | 40   | 0.832 | 1.305 | 1.044 | 0.782 | 82.15   | 9.89  | 23  | 40   | 1577 | 177.2 | 5.39 |
| Q969J3 | Loss of heterozygosity 12 chromosomal region 1 protein<br>OS=Homo sapiens<br>GN=LOH12CR1<br>PE=1 SV=1 - [L12R1_HUMAN]                                                                 | 39.29 | 1 | 7   | 7   | 14   | 0.905 | 1.046 | 0.886 | 0.782 | 30.59   | 39.29 | 10  | 14   | 196  | 22.2  | 6.35 |

|        |                                                                                                           |       |   |    |    |     |       |       |       |       |        |       |    |     |      |       |      |
|--------|-----------------------------------------------------------------------------------------------------------|-------|---|----|----|-----|-------|-------|-------|-------|--------|-------|----|-----|------|-------|------|
| Q8NFZ0 | F-box only protein 18<br>OS=Homo sapiens<br>GN=FBXO18<br>PE=1 SV=2 - [FBX18_HUMAN]                        | 0.86  | 1 | 1  | 1  | 1   | 1.415 | 0.894 | 0.785 | 0.782 | 0.00   | 0.86  | 1  | 1   | 1043 | 117.6 | 8.25 |
| Q8WUM4 | Programmed cell death 6-interacting protein<br>OS=Homo sapiens<br>GN=PDCD6IP<br>PE=1 SV=1 - [PDC61_HUMAN] | 55.30 | 1 | 47 | 47 | 324 | 0.930 | 1.060 | 1.028 | 0.782 | 686.41 | 55.30 | 76 | 324 | 868  | 96.0  | 6.52 |
| Q9C0C2 | 182 kDa tankyrase-1-binding protein<br>OS=Homo sapiens<br>GN=TNKS1BP1<br>PE=1 SV=4 - [TB182_HUMAN]        | 48.24 | 1 | 65 | 65 | 266 | 0.974 | 1.079 | 0.850 | 0.783 | 800.48 | 48.24 | 98 | 266 | 1729 | 181.7 | 4.86 |
| P29279 | Connective tissue growth factor<br>OS=Homo sapiens<br>GN=CTGF<br>PE=1 SV=2 - [CTGF_HUMAN]                 | 33.81 | 1 | 13 | 13 | 53  | 0.694 | 0.392 | 0.660 | 0.783 | 108.13 | 33.81 | 20 | 53  | 349  | 38.1  | 8.00 |
| P01116 | GTPase KRas<br>OS=Homo sapiens<br>GN=KRAS<br>PE=1 SV=1 - [RASK_HUMAN]                                     | 46.56 | 1 | 3  | 5  | 22  | 0.931 | 1.177 | 1.078 | 0.783 | 48.08  | 46.56 | 8  | 22  | 189  | 21.6  | 6.77 |
| Q92544 | Transmembrane 9 superfamily member 4<br>OS=Homo sapiens<br>GN=TM9SF4<br>PE=1 SV=2 - [TM9S4_HUMAN]         | 8.26  | 1 | 5  | 5  | 17  | 0.782 | 0.682 | 0.702 | 0.783 | 31.60  | 8.26  | 9  | 17  | 642  | 74.5  | 6.54 |
| P54578 | Ubiquitin carboxyl-terminal hydrolase 14<br>OS=Homo sapiens<br>GN=USP14<br>PE=1 SV=3 - [UBP14_HUMAN]      | 49.19 | 1 | 23 | 23 | 85  | 0.860 | 0.958 | 0.957 | 0.783 | 208.72 | 49.19 | 30 | 85  | 494  | 56.0  | 5.30 |
| A1A4S6 | Rho GTPase-activating protein 10<br>OS=Homo sapiens<br>GN=ARHGAP10<br>PE=1 SV=1 - [RHG10_HUMAN]           | 10.43 | 1 | 7  | 9  | 17  | 1.191 | 0.807 | 1.390 | 0.783 | 37.15  | 10.43 | 13 | 17  | 786  | 89.3  | 7.18 |
| P55060 | Exportin-2<br>OS=Homo sapiens<br>GN=CSE1L<br>PE=1 SV=3 - [XPO2_HUMAN]                                     | 27.09 | 1 | 26 | 26 | 98  | 0.804 | 0.960 | 0.844 | 0.783 | 249.83 | 27.09 | 43 | 98  | 971  | 110.3 | 5.77 |



|        |                                                                                                                    |       |   |    |    |     |       |       |       |       |        |       |    |     |      |       |      |
|--------|--------------------------------------------------------------------------------------------------------------------|-------|---|----|----|-----|-------|-------|-------|-------|--------|-------|----|-----|------|-------|------|
| O00410 | Importin-5<br>OS=Homo sapiens<br>GN=IPO5<br>PE=1 SV=4 - [IPO5_HUMAN]                                               | 26.89 | 1 | 25 | 25 | 111 | 0.504 | 0.782 | 0.781 | 0.783 | 299.20 | 26.89 | 40 | 111 | 1097 | 123.5 | 4.94 |
| Q9H8W5 | Tripartite motif-containing protein 45<br>OS=Homo sapiens<br>GN=TRIM45<br>PE=1 SV=2 - [TRI45_HUMAN]                | 5.86  | 1 | 3  | 3  | 3   | 1.626 | 0.388 | 0.498 | 0.783 | 2.64   | 5.86  | 3  | 3   | 580  | 64.3  | 7.91 |
| Q96M89 | Coiled-coil domain-containing protein 138<br>OS=Homo sapiens<br>GN=CCDC138<br>PE=1 SV=1 - [CC138_HUMAN]            | 1.80  | 1 | 1  | 2  | 3   | 1.159 | 1.348 | 1.234 | 0.783 | 6.90   | 1.80  | 2  | 3   | 665  | 76.2  | 8.53 |
| P04049 | RAF proto-oncogene serine/threonine kinase<br>OS=Homo sapiens<br>GN=RAF1<br>PE=1 SV=1 - [RAF1_HUMAN]               | 6.64  | 1 | 3  | 4  | 5   | 1.035 | 1.524 | 1.671 | 0.783 | 12.89  | 6.64  | 5  | 5   | 648  | 73.0  | 9.20 |
| Q9UQ13 | Leucine-rich repeat protein SHOC-2<br>OS=Homo sapiens<br>GN=SHOC2<br>PE=1 SV=2 - [SHOC2_HUMAN]                     | 4.47  | 1 | 2  | 2  | 2   | 1.096 | 1.202 | 1.088 | 0.783 | 8.40   | 4.47  | 2  | 2   | 582  | 64.8  | 8.46 |
| Q9UHE8 | Metalloreductase STEAP1<br>OS=Homo sapiens<br>GN=STEAP1<br>PE=1 SV=1 - [STEAP1_HUMAN]                              | 9.14  | 2 | 4  | 4  | 13  | 0.379 | 1.406 | 0.649 | 0.784 | 32.43  | 9.14  | 6  | 13  | 339  | 39.8  | 9.23 |
| Q6WRX3 | Protein zyg-11 homolog A<br>OS=Homo sapiens<br>GN=ZYG11A<br>PE=2 SV=3 - [ZY11A_HUMAN]                              | 1.71  | 1 | 1  | 2  | 2   | 1.379 | 1.134 | 1.191 | 0.784 | 4.24   | 1.71  | 2  | 2   | 759  | 85.8  | 7.97 |
| P49754 | Vacuolar protein sorting-associated protein 41 homolog<br>OS=Homo sapiens<br>GN=VPS41<br>PE=1 SV=3 - [VPS41_HUMAN] | 7.26  | 1 | 6  | 6  | 10  | 0.768 | 1.197 | 0.930 | 0.784 | 28.80  | 7.26  | 7  | 10  | 854  | 98.5  | 5.85 |
| Q9NQS1 | Cell death regulator Aven<br>OS=Homo sapiens<br>GN=AVEN<br>PE=1 SV=1 - [AVEN_HUMAN]                                | 9.94  | 2 | 3  | 3  | 12  | 0.652 | 0.776 | 0.749 | 0.784 | 34.57  | 9.94  | 3  | 12  | 362  | 38.5  | 4.98 |

|        |                                                                                                                       |       |   |    |    |     |       |       |       |       |         |       |    |     |      |       |      |
|--------|-----------------------------------------------------------------------------------------------------------------------|-------|---|----|----|-----|-------|-------|-------|-------|---------|-------|----|-----|------|-------|------|
| Q96H22 | Centromere protein N<br>OS=Homo sapiens<br>GN=CENPN<br>PE=1 SV=2 -<br>[CENPN_HUMAN]                                   | 3.24  | 1 | 1  | 1  | 2   | 1.400 | 0.980 | 0.509 | 0.784 | 6.29    | 3.24  | 1  | 2   | 339  | 39.5  | 9.13 |
| Q07866 | Kinesin light chain 1<br>OS=Homo sapiens<br>GN=KLC1 PE=1<br>SV=2 -<br>[KLC1_HUMAN]                                    | 55.15 | 1 | 26 | 36 | 199 | 0.948 | 0.833 | 1.016 | 0.784 | 535.95  | 55.15 | 57 | 199 | 573  | 65.3  | 6.20 |
| Q7Z7G1 | Cytokine-dependent hematopoietic cell linker<br>OS=Homo sapiens<br>GN=CLNK PE=1<br>SV=2 -<br>[CLNK_HUMAN]             | 2.34  | 1 | 1  | 1  | 1   | 0.864 | 0.931 | 1.128 | 0.784 | 0.00    | 2.34  | 1  | 1   | 428  | 49.5  | 9.01 |
| Q53SF7 | Cordon-bleu protein-like 1<br>OS=Homo sapiens<br>GN=COBL1<br>PE=1 SV=2 -<br>[COBL1_HUMAN]                             | 8.06  | 1 | 8  | 8  | 15  | 0.863 | 0.967 | 1.529 | 0.784 | 31.53   | 8.06  | 11 | 15  | 1204 | 131.7 | 6.67 |
| P23528 | Cofilin-1<br>OS=Homo sapiens<br>GN=CFI1 PE=1<br>SV=3 -<br>[COF1_HUMAN]                                                | 87.35 | 1 | 19 | 24 | 504 | 1.091 | 1.070 | 1.116 | 0.784 | 1182.38 | 87.35 | 38 | 504 | 166  | 18.5  | 8.09 |
| Q5VIR6 | Vacuolar protein sorting-associated protein 53 homolog<br>OS=Homo sapiens<br>GN=VPS53<br>PE=1 SV=1 -<br>[VPS53_HUMAN] | 6.58  | 1 | 5  | 5  | 11  | 0.840 | 0.909 | 0.923 | 0.784 | 22.70   | 6.58  | 7  | 11  | 699  | 79.6  | 6.02 |
| Q01469 | Fatty acid-binding protein, epidermal<br>OS=Homo sapiens<br>GN=FABP5<br>PE=1 SV=3 -<br>[FABP5_HUMAN]                  | 42.96 | 2 | 7  | 7  | 40  | 0.527 | 1.399 | 1.403 | 0.785 | 100.98  | 42.96 | 11 | 40  | 135  | 15.2  | 7.01 |
| P60660 | Myosin light polypeptide 6<br>OS=Homo sapiens<br>GN=MYL6<br>PE=1 SV=2 -<br>[MYL6_HUMAN]                               | 84.77 | 2 | 7  | 12 | 819 | 0.952 | 0.944 | 1.148 | 0.785 | 1984.98 | 84.77 | 23 | 819 | 151  | 16.9  | 4.65 |
| Q9UBG0 | C-type mannose receptor 2<br>OS=Homo sapiens<br>GN=MRC2<br>PE=1 SV=2 -<br>[MRC2_HUMAN]                                | 13.12 | 1 | 13 | 13 | 54  | 0.753 | 0.841 | 1.026 | 0.785 | 179.59  | 13.12 | 23 | 54  | 1479 | 166.6 | 5.83 |

|        |                                                                                                                             |       |   |    |    |     |       |       |       |       |        |       |    |     |      |       |      |
|--------|-----------------------------------------------------------------------------------------------------------------------------|-------|---|----|----|-----|-------|-------|-------|-------|--------|-------|----|-----|------|-------|------|
| Q9UNF1 | Melanoma-associated antigen D2<br>OS=Homo sapiens<br>GN=MAGED2<br>PE=1 SV=2 - [MAGED2_HUMAN]                                | 27.56 | 1 | 14 | 15 | 89  | 0.665 | 0.814 | 0.850 | 0.785 | 210.11 | 27.56 | 23 | 89  | 606  | 64.9  | 9.32 |
| Q6IAN0 | Dehydrogenase/reductase SDR family member<br>7B OS=Homo sapiens<br>GN=DHRS7B<br>PE=1 SV=2 - [DRS7B_HUMAN]                   | 15.38 | 1 | 4  | 4  | 11  | 0.804 | 0.764 | 0.744 | 0.785 | 28.40  | 15.38 | 6  | 11  | 325  | 35.1  | 9.55 |
| P49356 | Protein farnesyltransferase subunit beta<br>OS=Homo sapiens<br>GN=FNTB<br>PE=1 SV=1 - [FNTB_HUMAN]                          | 5.72  | 1 | 4  | 4  | 11  | 0.851 | 0.909 | 0.794 | 0.785 | 20.12  | 5.72  | 7  | 11  | 437  | 48.7  | 5.82 |
| P55010 | Eukaryotic translation initiation factor 5<br>OS=Homo sapiens<br>GN=EIF5 PE=1 SV=2 - [IF5_HUMAN]                            | 34.34 | 1 | 17 | 17 | 107 | 0.735 | 0.900 | 0.874 | 0.785 | 210.57 | 34.34 | 26 | 107 | 431  | 49.2  | 5.58 |
| Q8N3D4 | EH domain-binding protein 1-like protein 1<br>OS=Homo sapiens<br>GN=EHP1L1<br>PE=1 SV=2 - [EH1L1_HUMAN]                     | 17.33 | 1 | 20 | 21 | 65  | 0.908 | 1.167 | 1.497 | 0.786 | 189.18 | 17.33 | 33 | 65  | 1523 | 161.8 | 4.83 |
| Q9H7D0 | Dedicator of cytokinesis protein 5<br>OS=Homo sapiens<br>GN=DOCK5<br>PE=1 SV=3 - [DOCK5_HUMAN]                              | 5.08  | 1 | 7  | 10 | 16  | 1.325 | 0.918 | 1.038 | 0.786 | 26.52  | 5.08  | 13 | 16  | 1870 | 215.2 | 7.96 |
| Q9H3K2 | Growth hormone-inducible transmembrane protein<br>OS=Homo sapiens<br>GN=GHTM<br>PE=1 SV=2 - [GHTM_HUMAN]                    | 6.38  | 1 | 2  | 2  | 19  | 0.889 | 0.929 | 0.612 | 0.786 | 59.66  | 6.38  | 3  | 19  | 345  | 37.2  | 9.94 |
| P62140 | Serine/threonine-protein phosphatase PP1-beta catalytic subunit<br>OS=Homo sapiens<br>GN=PPP1CB<br>PE=1 SV=3 - [PP1B_HUMAN] | 48.62 | 1 | 6  | 14 | 89  | 0.930 | 1.096 | 1.352 | 0.786 | 225.10 | 48.62 | 25 | 89  | 327  | 37.2  | 6.19 |

|        |                                                                                                                            |       |   |    |    |    |       |       |       |       |        |       |    |    |      |       |      |
|--------|----------------------------------------------------------------------------------------------------------------------------|-------|---|----|----|----|-------|-------|-------|-------|--------|-------|----|----|------|-------|------|
| Q6ZVF9 | G protein-regulated inducer of neurite outgrowth 3<br>OS=Homo sapiens<br>GN=GPRIN3<br>PE=2 SV=2 - [GRIN3_HUMAN]            | 2.06  | 3 | 2  | 2  | 2  | 0.923 | 0.564 | 0.822 | 0.786 | 3.91   | 2.06  | 2  | 2  | 776  | 82.4  | 7.56 |
| Q5GLZ8 | Probable E3 ubiquitin-protein ligase<br>HERC4<br>OS=Homo sapiens<br>GN=HERC4<br>PE=1 SV=1 - [HERC4_HUMAN]                  | 15.99 | 1 | 14 | 14 | 37 | 0.815 | 0.757 | 1.045 | 0.786 | 91.46  | 15.99 | 24 | 37 | 1057 | 118.5 | 6.19 |
| P62873 | Guanine nucleotide-binding protein G(I)/G(S)/G(T) subunit beta-1<br>OS=Homo sapiens<br>GN=GNB1<br>PE=1 SV=3 - [GBB1_HUMAN] | 36.47 | 2 | 7  | 10 | 53 | 0.968 | 0.690 | 0.868 | 0.786 | 129.12 | 36.47 | 16 | 53 | 340  | 37.4  | 6.00 |
| O00471 | Exocyst complex component 5<br>OS=Homo sapiens<br>GN=EXOC5<br>PE=1 SV=1 - [EXOC5_HUMAN]                                    | 18.50 | 1 | 15 | 15 | 38 | 1.072 | 0.859 | 0.912 | 0.786 | 88.93  | 18.50 | 26 | 38 | 708  | 81.8  | 6.71 |
| Q8TED9 | Actin filament-associated protein 1-like 1<br>OS=Homo sapiens<br>GN=AFAP1L1<br>PE=1 SV=2 - [AF1L1_HUMAN]                   | 1.95  | 1 | 1  | 1  | 1  | 0.586 | 0.566 | 0.681 | 0.787 | 2.18   | 1.95  | 1  | 1  | 768  | 86.4  | 6.80 |
| Q12929 | Epidermal growth factor receptor kinase substrate 8<br>OS=Homo sapiens<br>GN=EPS8<br>PE=1 SV=1 - [EPS8_HUMAN]              | 24.45 | 1 | 15 | 15 | 34 | 0.717 | 1.094 | 1.018 | 0.787 | 81.29  | 24.45 | 24 | 34 | 822  | 91.8  | 7.50 |
| Q8NI08 | Nuclear receptor coactivator 7<br>OS=Homo sapiens<br>GN=NCOA7<br>PE=1 SV=2 - [NCOA7_HUMAN]                                 | 0.64  | 1 | 1  | 1  | 2  | 0.857 | 0.883 | 1.213 | 0.787 | 1.65   | 0.64  | 1  | 2  | 942  | 106.1 | 5.59 |
| Q13017 | Rho GTPase-activating protein 5<br>OS=Homo sapiens<br>GN=ARHGAP5<br>PE=1 SV=2 - [RHG05_HUMAN]                              | 7.52  | 2 | 7  | 8  | 17 | 0.740 | 1.291 | 1.073 | 0.787 | 38.65  | 7.52  | 12 | 17 | 1502 | 172.4 | 6.62 |

|        |                                                                                                       |       |   |    |    |     |       |       |       |       |         |       |    |     |      |       |      |
|--------|-------------------------------------------------------------------------------------------------------|-------|---|----|----|-----|-------|-------|-------|-------|---------|-------|----|-----|------|-------|------|
| Q9Y4K3 | TNF receptor-associated factor 6<br>OS=Homo sapiens<br>GN=TRAF6<br>PE=1 SV=1 - [TRAF6_HUMAN]          | 2.30  | 1 | 1  | 1  | 2   | 1.033 | 0.619 | 0.886 | 0.787 | 2.66    | 2.30  | 2  | 2   | 522  | 59.5  | 6.44 |
| Q92804 | TATA-binding protein-associated factor 2N<br>OS=Homo sapiens<br>GN=TAF15<br>PE=1 SV=1 - [RBP56_HUMAN] | 8.28  | 1 | 2  | 5  | 35  | 0.702 | 0.960 | 0.695 | 0.787 | 74.54   | 8.28  | 8  | 35  | 592  | 61.8  | 8.02 |
| Q99439 | Calponin-2<br>OS=Homo sapiens<br>GN=CNN2<br>PE=1 SV=4 - [CNN2_HUMAN]                                  | 67.96 | 1 | 16 | 18 | 239 | 0.953 | 0.896 | 1.313 | 0.787 | 572.55  | 67.96 | 30 | 239 | 309  | 33.7  | 7.33 |
| Q96J81 | Dynein heavy chain 8, axonemal<br>OS=Homo sapiens<br>GN=DNAH8<br>PE=1 SV=2 - [DYH8_HUMAN]             | 1.58  | 1 | 4  | 5  | 5   | 0.735 | 0.946 | 0.738 | 0.788 | 10.52   | 1.58  | 5  | 5   | 4490 | 514.3 | 6.32 |
| Q5BJH7 | Protein YIF1B<br>OS=Homo sapiens<br>GN=YIF1B<br>PE=1 SV=1 - [YIF1B_HUMAN]                             | 28.34 | 1 | 5  | 5  | 11  | 1.001 | 0.941 | 0.778 | 0.788 | 31.07   | 28.34 | 5  | 11  | 314  | 34.4  | 9.16 |
| Q92581 | Sodium/hydrogen exchanger 6<br>OS=Homo sapiens<br>GN=SLC9A6<br>PE=1 SV=2 - [SL9A6_HUMAN]              | 1.79  | 1 | 1  | 1  | 2   | 0.853 | 0.402 | 0.489 | 0.788 | 7.69    | 1.79  | 2  | 2   | 669  | 74.1  | 6.48 |
| Q8WUX9 | Charged multivesicular body protein 7<br>OS=Homo sapiens<br>GN=CHMP7<br>PE=1 SV=1 - [CHMP7_HUMAN]     | 5.74  | 1 | 3  | 3  | 9   | 0.784 | 1.065 | 0.983 | 0.788 | 16.68   | 5.74  | 3  | 9   | 453  | 50.9  | 5.35 |
| O75083 | WD repeat-containing protein 1<br>OS=Homo sapiens<br>GN=WDR1<br>PE=1 SV=4 - [WDR1_HUMAN]              | 70.30 | 1 | 35 | 35 | 368 | 0.962 | 1.042 | 1.244 | 0.788 | 1020.07 | 70.30 | 59 | 368 | 606  | 66.2  | 6.65 |
| P50225 | Sulfotransferase 1A1<br>OS=Homo sapiens<br>GN=SULT1A1<br>PE=1 SV=3 - [ST1A1_HUMAN]                    | 24.75 | 3 | 7  | 7  | 37  | 0.713 | 0.607 | 0.660 | 0.788 | 92.53   | 24.75 | 13 | 37  | 295  | 34.1  | 6.62 |

|        |                                                                                                                |       |   |    |    |    |       |       |       |       |       |       |    |    |      |       |      |
|--------|----------------------------------------------------------------------------------------------------------------|-------|---|----|----|----|-------|-------|-------|-------|-------|-------|----|----|------|-------|------|
| Q9HD45 | Transmembrane 9 superfamily member 3<br>OS=Homo sapiens<br>GN=TM9SF3<br>PE=1 SV=2 - [TM9S3_HUMAN]              | 11.54 | 1 | 6  | 6  | 15 | 0.917 | 0.689 | 0.587 | 0.788 | 26.94 | 11.54 | 9  | 15 | 589  | 67.8  | 7.21 |
| Q92562 | Polyphosphoinositide phosphatase<br>OS=Homo sapiens<br>GN=FIG4 PE=1 SV=1 - [FIG4_HUMAN]                        | 1.87  | 1 | 2  | 2  | 5  | 0.911 | 1.177 | 1.050 | 0.788 | 10.44 | 1.87  | 2  | 5  | 907  | 103.6 | 6.92 |
| P35475 | Alpha-L-iduronidase<br>OS=Homo sapiens<br>GN=IDUA PE=1 SV=2 - [IDUA_HUMAN]                                     | 17.76 | 1 | 10 | 10 | 32 | 0.888 | 0.840 | 0.960 | 0.788 | 64.86 | 17.76 | 19 | 32 | 653  | 72.6  | 9.14 |
| Q15678 | Tyrosine-protein phosphatase non-receptor type 14<br>OS=Homo sapiens<br>GN=PTPN14<br>PE=1 SV=2 - [PTN14_HUMAN] | 3.71  | 1 | 3  | 3  | 3  | 0.648 | 1.328 | 1.158 | 0.788 | 6.93  | 3.71  | 3  | 3  | 1187 | 135.2 | 8.31 |
| Q9H6Y7 | E3 ubiquitin-protein ligase RNF167<br>OS=Homo sapiens<br>GN=RNF167<br>PE=1 SV=1 - [RNF167_HUMAN]               | 2.57  | 1 | 1  | 1  | 2  | 0.951 | 0.980 | 0.760 | 0.788 | 3.66  | 2.57  | 2  | 2  | 350  | 38.3  | 5.63 |
| B1ANS9 | WD repeat-containing protein 64<br>OS=Homo sapiens<br>GN=WDR64<br>PE=2 SV=1 - [WDR64_HUMAN]                    | 1.85  | 1 | 1  | 2  | 2  | 1.114 | 0.726 | 0.940 | 0.788 | 5.32  | 1.85  | 2  | 2  | 1081 | 123.6 | 8.19 |
| Q86UD0 | Suppressor APC domain-containing protein 2<br>OS=Homo sapiens<br>GN=SAPCD2<br>PE=2 SV=2 - [SAPC2_HUMAN]        | 1.78  | 1 | 1  | 1  | 3  | 0.787 | 0.872 | 1.201 | 0.789 | 4.30  | 1.78  | 2  | 3  | 394  | 42.6  | 8.82 |
| P33897 | ATP-binding cassette subfamily D member 1<br>OS=Homo sapiens<br>GN=ABCD1<br>PE=1 SV=2 - [ABCD1_HUMAN]          | 10.07 | 2 | 6  | 7  | 24 | 1.123 | 1.376 | 1.428 | 0.789 | 59.17 | 10.07 | 11 | 24 | 745  | 82.9  | 8.95 |

|        |                                                                                                                        |       |   |    |    |    |       |       |       |       |        |       |    |    |      |       |      |
|--------|------------------------------------------------------------------------------------------------------------------------|-------|---|----|----|----|-------|-------|-------|-------|--------|-------|----|----|------|-------|------|
| O60684 | Importin subunit alpha-7<br>OS=Homo sapiens<br>GN=KPNA6<br>PE=1 SV=1 - [IMA7_HUMAN]                                    | 22.01 | 1 | 6  | 10 | 48 | 0.925 | 1.015 | 1.103 | 0.789 | 123.76 | 22.01 | 16 | 48 | 536  | 60.0  | 4.98 |
| P12883 | Myosin-7<br>OS=Homo sapiens<br>GN=MYH7<br>PE=1 SV=5 - [MYH7_HUMAN]                                                     | 5.84  | 1 | 1  | 13 | 95 | 0.789 | 0.916 | 0.941 | 0.789 | 192.94 | 5.84  | 16 | 95 | 1935 | 223.0 | 5.80 |
| Q8WUG5 | Solute carrier family 22 member 17<br>OS=Homo sapiens<br>GN=SLC22A17<br>PE=2 SV=1 - [S22AH_HUMAN]                      | 3.72  | 1 | 1  | 1  | 1  | 0.644 | 0.569 | 0.476 | 0.789 | 0.00   | 3.72  | 1  | 1  | 538  | 57.6  | 7.39 |
| P62495 | Eukaryotic peptide chain release factor subunit 1<br>OS=Homo sapiens<br>GN=ETF1<br>PE=1 SV=3 - [ERF1_HUMAN]            | 26.77 | 1 | 11 | 11 | 43 | 0.884 | 0.742 | 0.826 | 0.790 | 113.26 | 26.77 | 17 | 43 | 437  | 49.0  | 5.71 |
| Q8IWT3 | Cullin-9<br>OS=Homo sapiens<br>GN=CUL9 PE=1 SV=2 - [CUL9_HUMAN]                                                        | 0.36  | 1 | 1  | 1  | 2  | 1.490 | 1.125 | 1.188 | 0.790 | 5.28   | 0.36  | 1  | 2  | 2517 | 281.0 | 5.45 |
| Q9BZM5 | NKG2D ligand 2<br>OS=Homo sapiens<br>GN=ULBP2<br>PE=1 SV=1 - [N2DL2_HUMAN]                                             | 7.32  | 1 | 1  | 1  | 2  | 0.744 | 1.874 | 1.383 | 0.790 | 5.15   | 7.32  | 1  | 2  | 246  | 27.3  | 7.30 |
| O43613 | Orexin receptor type 1<br>OS=Homo sapiens<br>GN=HCRTR1<br>PE=2 SV=2 - [OX1R_HUMAN]                                     | 2.82  | 1 | 1  | 1  | 1  | 0.705 | 1.121 | 1.108 | 0.790 | 0.00   | 2.82  | 1  | 1  | 425  | 47.5  | 9.10 |
| Q9NQS3 | Nectin-3<br>OS=Homo sapiens<br>GN=PVRL3<br>PE=1 SV=1 - [PVRL3_HUMAN]                                                   | 1.64  | 1 | 1  | 1  | 2  | 1.306 | 0.965 |       | 0.791 | 5.04   | 1.64  | 1  | 2  | 549  | 61.0  | 6.19 |
| Q8NDI1 | EH domain-binding protein 1<br>OS=Homo sapiens<br>GN=EHP1<br>PE=1 SV=3 - [EHP1_HUMAN]                                  | 8.53  | 1 | 8  | 10 | 17 | 0.999 | 1.467 | 1.132 | 0.791 | 39.11  | 8.53  | 11 | 17 | 1231 | 139.9 | 5.35 |
| O14733 | Dual specificity mitogen-activated protein kinase kinase 7<br>OS=Homo sapiens<br>GN=MAP2K7<br>PE=1 SV=2 - [MP2K7_HUMA] | 5.73  | 1 | 2  | 3  | 7  | 0.940 | 0.622 | 0.687 | 0.791 | 11.10  | 5.73  | 3  | 7  | 419  | 47.5  | 9.16 |

|        |                                                                                                                                                                                |       |   |    |    |    |       |       |       |       |        |       |    |    |      |       |      |
|--------|--------------------------------------------------------------------------------------------------------------------------------------------------------------------------------|-------|---|----|----|----|-------|-------|-------|-------|--------|-------|----|----|------|-------|------|
| Q9NPB1 | 5'(3')-<br>deoxyribonucle<br>otidase,<br>mitochondrial<br>OS=Homo<br>sapiens<br>GN=NT5M<br>PE=1 SV=1 -<br>[NT5M_HUMAN]                                                         | 5.26  | 1 | 1  | 1  | 2  | 0.935 | 0.768 | 1.621 | 0.791 | 0.00   | 5.26  | 1  | 2  | 228  | 25.8  | 8.00 |
| Q13618 | Cullin-3<br>OS=Homo<br>sapiens<br>GN=CUL3 PE=1<br>SV=2 -<br>[CUL3_HUMAN]                                                                                                       | 28.65 | 1 | 19 | 21 | 47 | 0.772 | 0.759 | 0.846 | 0.791 | 108.34 | 28.65 | 33 | 47 | 768  | 88.9  | 8.48 |
| Q14596 | Next to BRCA1<br>gene 1 protein<br>OS=Homo<br>sapiens<br>GN=NBR1<br>PE=1 SV=3 -<br>[NBR1_HUMAN]                                                                                | 2.07  | 1 | 1  | 1  | 1  | 0.897 | 1.392 | 1.557 | 0.792 | 4.31   | 2.07  | 1  | 1  | 966  | 107.3 | 5.12 |
| A2VEC9 | SCO-spondin<br>OS=Homo<br>sapiens<br>GN=SSPO<br>PE=2 SV=1 -<br>[SSPO_HUMAN]                                                                                                    | 0.45  | 1 | 2  | 2  | 2  | 1.144 | 1.000 | 0.984 | 0.792 | 5.06   | 0.45  | 2  | 2  | 5147 | 547.1 | 6.02 |
| Q9Y2S2 | Lambda-<br>crystallin<br>homolog<br>OS=Homo<br>sapiens<br>GN=CRYL1<br>PE=1 SV=3 -<br>[CRYL1_HUMAN<br>]                                                                         | 15.05 | 1 | 5  | 5  | 21 | 0.706 | 1.091 | 0.922 | 0.792 | 56.27  | 15.05 | 8  | 21 | 319  | 35.4  | 6.18 |
| P06865 | Beta-<br>hexosaminidase<br>subunit alpha<br>OS=Homo<br>sapiens<br>GN=HEXA<br>PE=1 SV=2 -<br>[HEXA_HUMAN]                                                                       | 22.12 | 1 | 12 | 14 | 78 | 0.748 | 1.006 | 0.922 | 0.792 | 176.98 | 22.12 | 23 | 78 | 529  | 60.7  | 5.16 |
| Q9UNM6 | 26S<br>proteasome<br>non-ATPase<br>regulatory<br>subunit 13<br>OS=Homo<br>sapiens<br>GN=PSMD13<br>PE=1 SV=2 -<br>[PSD13_HUMAN<br>PQ-loop<br>repeat-<br>containing<br>protein 1 | 46.81 | 1 | 17 | 17 | 59 | 0.878 | 0.884 | 0.876 | 0.792 | 136.77 | 46.81 | 27 | 59 | 376  | 42.9  | 5.81 |
| Q8N2U9 | OS=Homo<br>sapiens<br>GN=PQLC1<br>PE=2 SV=1 -<br>[PQLC1_HUMAN<br>Serine/threoni<br>ne-protein<br>phosphatase 6<br>regulatory<br>ankyrin repeat<br>subunit B                    | 8.86  | 1 | 2  | 2  | 2  | 1.154 | 0.833 | 0.614 | 0.792 | 4.27   | 8.86  | 2  | 2  | 271  | 30.5  | 8.18 |
| Q8N8A2 | OS=Homo<br>sapiens<br>GN=ANKRD44<br>PE=1 SV=3 -<br>[ANR44_HUMAN<br>]                                                                                                           | 5.14  | 1 | 5  | 5  | 11 | 0.758 | 0.976 | 1.105 | 0.793 | 30.28  | 5.14  | 7  | 11 | 993  | 107.5 | 6.30 |



|        |                                                                                                                                      |       |   |    |    |     |       |       |       |       |        |       |    |     |      |       |      |
|--------|--------------------------------------------------------------------------------------------------------------------------------------|-------|---|----|----|-----|-------|-------|-------|-------|--------|-------|----|-----|------|-------|------|
| P11362 | Fibroblast growth factor receptor 1<br>OS=Homo sapiens<br>GN=FGFR1<br>PE=1 SV=3 - [FGFR1_HUMAN]                                      | 10.34 | 7 | 6  | 8  | 28  | 1.204 | 0.697 | 0.640 | 0.793 | 60.95  | 10.34 | 13 | 28  | 822  | 91.8  | 6.21 |
| Q8NFU3 | Thiosulfate sulfurtransferase/rhodanese-like domain-containing protein 1<br>OS=Homo sapiens<br>GN=TSTD1<br>PE=1 SV=3 - [TSTD1_HUMAN] | 7.83  | 1 | 1  | 1  | 3   | 1.277 | 2.440 | 0.904 | 0.793 | 3.33   | 7.83  | 2  | 3   | 115  | 12.5  | 6.07 |
| Q6NW29 | RWD domain-containing protein 4<br>OS=Homo sapiens<br>GN=RWDD4<br>PE=1 SV=3 - [RWDD4_HUMAN]                                          | 18.62 | 2 | 3  | 4  | 15  | 0.646 | 0.784 | 1.046 | 0.793 | 31.28  | 18.62 | 6  | 15  | 188  | 21.2  | 5.31 |
| Q9GZT4 | Serine racemase<br>OS=Homo sapiens<br>GN=SRR PE=1 SV=1 - [SRR_HUMAN]                                                                 | 23.24 | 1 | 6  | 6  | 12  | 1.188 | 0.897 | 0.980 | 0.794 | 35.99  | 23.24 | 9  | 12  | 340  | 36.5  | 6.54 |
| Q9Y2G5 | GDP-fucose protein O-fucosyltransferase 2<br>OS=Homo sapiens<br>GN=POFUT2<br>PE=1 SV=3 - [OFUT2_HUMAN]                               | 21.68 | 2 | 10 | 12 | 38  | 0.562 | 0.775 | 0.845 | 0.794 | 88.70  | 21.68 | 17 | 38  | 429  | 49.9  | 6.60 |
| P86434 | Putative uncharacterized protein ADORA2A-AS1<br>OS=Homo sapiens<br>GN=ADORA2A-AS1 PE=5 SV=1 - [AAS1_HUMAN]                           | 11.32 | 1 | 1  | 1  | 1   | 1.638 | 1.600 | 1.404 | 0.794 | 0.00   | 11.32 | 1  | 1   | 159  | 17.2  | 6.65 |
| Q9JUJ6 | Drebrin-like protein<br>OS=Homo sapiens<br>GN=DBNL PE=1 SV=1 - [DBNL_HUMAN]                                                          | 41.16 | 1 | 16 | 16 | 112 | 0.885 | 1.171 | 1.100 | 0.795 | 291.12 | 41.16 | 28 | 112 | 430  | 48.2  | 5.05 |
| O15078 | Centrosomal protein of 290 kDa<br>OS=Homo sapiens<br>GN=CEP290<br>PE=1 SV=2 - [CE290_HUMAN]                                          | 2.74  | 3 | 4  | 8  | 40  | 0.819 | 0.819 | 0.866 | 0.795 | 81.16  | 2.74  | 11 | 40  | 2479 | 290.2 | 5.95 |

|        |                                                                                                                 |       |   |    |    |     |       |       |       |       |        |       |    |     |      |       |      |
|--------|-----------------------------------------------------------------------------------------------------------------|-------|---|----|----|-----|-------|-------|-------|-------|--------|-------|----|-----|------|-------|------|
| Q12830 | Nucleosome-remodeling factor subunit BPTF<br>OS=Homo sapiens<br>GN=BPTF<br>PE=1 SV=3 - [BPTF_HUMAN]             | 1.48  | 1 | 3  | 3  | 3   | 0.490 | 2.169 | 1.311 | 0.795 | 3.16   | 1.48  | 3  | 3   | 3046 | 338.1 | 6.54 |
| Q14653 | Interferon regulatory factor 3<br>OS=Homo sapiens<br>GN=IRF3 PE=1 SV=1 - [IRF3_HUMAN]                           | 9.13  | 1 | 4  | 4  | 9   | 1.129 | 1.184 | 1.245 | 0.795 | 13.25  | 9.13  | 6  | 9   | 427  | 47.2  | 5.34 |
| Q8WTW3 | Conserved oligomeric Golgi complex subunit 1<br>OS=Homo sapiens<br>GN=COG1<br>PE=1 SV=1 - [COG1_HUMAN]          | 7.24  | 1 | 6  | 6  | 10  | 0.804 | 0.856 | 0.904 | 0.795 | 24.00  | 7.24  | 8  | 10  | 980  | 108.9 | 7.31 |
| P68036 | Ubiquitin-conjugating enzyme E2 L3<br>OS=Homo sapiens<br>GN=UBE2L3<br>PE=1 SV=1 - [UBE2L3_HUMAN]                | 58.44 | 2 | 9  | 9  | 77  | 1.083 | 0.964 | 1.027 | 0.795 | 203.26 | 58.44 | 15 | 77  | 154  | 17.9  | 8.51 |
| Q96K12 | Fatty acyl-CoA reductase 2<br>OS=Homo sapiens<br>GN=FAR2<br>PE=2 SV=1 - [FAR2_HUMAN]                            | 3.11  | 1 | 1  | 1  | 1   | 0.885 | 0.987 | 2.261 | 0.795 | 0.00   | 3.11  | 1  | 1   | 515  | 59.4  | 9.38 |
| P67812 | Signal peptidase complex catalytic subunit SEC11A<br>OS=Homo sapiens<br>GN=SEC11A<br>PE=1 SV=1 - [SEC11A_HUMAN] | 27.93 | 2 | 8  | 8  | 47  | 0.763 | 0.749 | 0.763 | 0.795 | 97.24  | 27.93 | 14 | 47  | 179  | 20.6  | 9.48 |
| Q15843 | NEDD8<br>OS=Homo sapiens<br>GN=NEDD8<br>PE=1 SV=1 - [NEDD8_HUMAN]                                               | 46.91 | 1 | 5  | 6  | 107 | 1.498 | 1.156 | 1.057 | 0.795 | 253.83 | 46.91 | 9  | 107 | 81   | 9.1   | 8.43 |
| O95817 | BAG family molecular chaperone regulator 3<br>OS=Homo sapiens<br>GN=BAG3<br>PE=1 SV=3 - [BAG3_HUMAN]            | 45.39 | 1 | 19 | 19 | 76  | 0.622 | 0.947 | 1.034 | 0.796 | 190.83 | 45.39 | 33 | 76  | 575  | 61.6  | 6.95 |

|        |                                                                                                                                                                                                 |       |   |    |    |    |       |       |       |       |        |       |    |    |      |       |      |
|--------|-------------------------------------------------------------------------------------------------------------------------------------------------------------------------------------------------|-------|---|----|----|----|-------|-------|-------|-------|--------|-------|----|----|------|-------|------|
| P49914 | 5-<br>formyltetrahydr<br>ofolate cydo-<br>ligase<br>OS=Homo<br>sapiens<br>GN=MTHFS<br>PE=1 SV=2 -<br>[MTHFS_HUMA<br>N]                                                                          | 21.18 | 1 | 4  | 4  | 10 | 0.720 | 0.802 | 0.608 | 0.796 | 18.56  | 21.18 | 7  | 10 | 203  | 23.2  | 7.88 |
| P10124 | Serglycin<br>OS=Homo<br>sapiens<br>GN=SRGN<br>PE=1 SV=3 -<br>[SRGN_HUMAN]                                                                                                                       | 3.80  | 1 | 1  | 1  | 1  | 0.525 | 1.006 | 0.753 | 0.796 | 1.97   | 3.80  | 1  | 1  | 158  | 17.6  | 4.96 |
| O75569 | Interferon-<br>inducible<br>double-<br>stranded RNA-<br>dependent<br>protein kinase<br>activator A<br>OS=Homo<br>sapiens<br>GN=PRKRA<br>PE=1 SV=1 -<br>[PRKRA_HUMAN<br>]                        | 43.45 | 1 | 13 | 13 | 70 | 0.962 | 0.869 | 0.842 | 0.796 | 175.46 | 43.45 | 24 | 70 | 313  | 34.4  | 8.41 |
| Q70IA6 | MOB kinase<br>activator 2<br>OS=Homo<br>sapiens<br>GN=MOB2<br>PE=1 SV=1 -<br>[MOB2_HUMAN<br>]                                                                                                   | 8.86  | 1 | 2  | 2  | 7  | 1.284 | 0.937 | 0.975 | 0.797 | 19.36  | 8.86  | 4  | 7  | 237  | 26.9  | 6.79 |
| Q15036 | Sorting nexin-<br>17 OS=Homo<br>sapiens<br>GN=SNX17<br>PE=1 SV=1 -<br>[SNX17_HUMAN<br>]                                                                                                         | 8.09  | 2 | 4  | 4  | 9  | 1.160 | 0.859 | 0.944 | 0.797 | 20.09  | 8.09  | 6  | 9  | 470  | 52.9  | 7.46 |
| Q8WXH0 | Nesprin-2<br>OS=Homo<br>sapiens<br>GN=SYNE2<br>PE=1 SV=3 -<br>[SYNE2_HUMAN<br>]                                                                                                                 | 2.63  | 2 | 11 | 19 | 32 | 0.708 | 0.851 | 0.763 | 0.797 | 57.78  | 2.63  | 21 | 32 | 6885 | 795.9 | 5.36 |
| Q5T1J5 | Putative coiled-<br>coil-helix-coiled-<br>coil-helix<br>domain-<br>containing<br>protein<br>CHCHD2P9,<br>mitochondrial<br>OS=Homo<br>sapiens<br>GN=CHCHD2P9<br>PE=5 SV=1 -<br>[CHCH9_HUMAN<br>] | 8.61  | 2 | 1  | 1  | 3  | 0.633 | 0.626 | 0.870 | 0.797 | 9.81   | 8.61  | 2  | 3  | 151  | 15.5  | 9.89 |
| Q9BXW6 | Oxysterol-<br>binding protein-<br>related protein<br>1 OS=Homo<br>sapiens<br>GN=OSBPL1A<br>PE=1 SV=2 -<br>[OSBL1_HUMAN<br>]                                                                     | 6.32  | 1 | 4  | 4  | 7  | 1.016 | 1.035 | 1.617 | 0.797 | 7.64   | 6.32  | 5  | 7  | 950  | 108.4 | 6.38 |

|        |                                                                                                                          |       |   |    |    |     |       |       |       |       |         |       |    |     |      |       |      |
|--------|--------------------------------------------------------------------------------------------------------------------------|-------|---|----|----|-----|-------|-------|-------|-------|---------|-------|----|-----|------|-------|------|
| Q01518 | Adenylyl cyclase-associated protein 1<br>OS=Homo sapiens<br>GN=CAP1<br>PE=1 SV=5 - [CAP1_HUMAN]                          | 49.05 | 1 | 22 | 24 | 355 | 1.044 | 1.148 | 1.297 | 0.797 | 1006.65 | 49.05 | 43 | 355 | 475  | 51.9  | 8.06 |
| O00159 | Unconventional myosin-1c<br>OS=Homo sapiens<br>GN=MYO1C<br>PE=1 SV=4 - [MYO1C_HUMAN]                                     | 49.67 | 1 | 51 | 51 | 312 | 1.235 | 1.034 | 1.093 | 0.797 | 839.43  | 49.67 | 84 | 312 | 1063 | 121.6 | 9.41 |
| O14907 | Tax1-binding protein 3<br>OS=Homo sapiens<br>GN=TAX1BP3<br>PE=1 SV=2 - [TX1B3_HUMAN]                                     | 28.23 | 1 | 2  | 2  | 21  | 0.575 | 0.922 | 1.078 | 0.797 | 104.64  | 28.23 | 4  | 21  | 124  | 13.7  | 8.48 |
| Q15124 | Phosphoglucosyltransferase-like protein 5<br>OS=Homo sapiens<br>GN=PGM5<br>PE=1 SV=2 - [PGM5_HUMAN]                      | 20.63 | 1 | 9  | 11 | 37  | 0.637 | 5.371 | 2.982 | 0.797 | 77.17   | 20.63 | 19 | 37  | 567  | 62.2  | 7.21 |
| Q9H939 | Proline-serine-threonine phosphatase-interacting protein 2<br>OS=Homo sapiens<br>GN=PSTPIP2<br>PE=1 SV=4 - [PPIP2_HUMAN] | 7.19  | 1 | 2  | 2  | 6   | 0.665 | 0.627 | 0.633 | 0.798 | 10.66   | 7.19  | 3  | 6   | 334  | 38.8  | 8.48 |
| P09960 | Leukotriene A-4 hydrolase<br>OS=Homo sapiens<br>GN=LTA4H<br>PE=1 SV=2 - [LKHA4_HUMAN]                                    | 47.46 | 1 | 24 | 25 | 109 | 0.728 | 0.835 | 0.925 | 0.798 | 277.10  | 47.46 | 44 | 109 | 611  | 69.2  | 6.18 |
| O95379 | Tumor necrosis factor alpha-induced protein 8<br>OS=Homo sapiens<br>GN=TNFAIP8<br>PE=1 SV=1 - [TFIP8_HUMAN]              | 10.10 | 1 | 1  | 1  | 2   | 0.714 | 1.054 | 1.514 | 0.798 | 6.66    | 10.10 | 2  | 2   | 198  | 23.0  | 7.93 |
| P32298 | G protein-coupled receptor kinase 4<br>OS=Homo sapiens<br>GN=GRK4<br>PE=1 SV=3 - [GRK4_HUMAN]                            | 2.60  | 1 | 1  | 1  | 1   | 1.031 | 0.909 | 1.580 | 0.798 | 2.69    | 2.60  | 1  | 1   | 578  | 66.5  | 7.71 |
| P30519 | Heme oxygenase 2<br>OS=Homo sapiens<br>GN=HMOX2<br>PE=1 SV=2 - [HMOX2_HUMAN]                                             | 35.13 | 1 | 9  | 9  | 51  | 0.776 | 0.889 | 0.947 | 0.798 | 140.91  | 35.13 | 15 | 51  | 316  | 36.0  | 5.41 |

|        |                                                                                                                   |       |   |    |    |    |       |       |       |       |        |       |    |    |      |       |      |
|--------|-------------------------------------------------------------------------------------------------------------------|-------|---|----|----|----|-------|-------|-------|-------|--------|-------|----|----|------|-------|------|
| Q9NP61 | ADP-ribosylation factor GTPase-activating protein 3<br>OS=Homo sapiens<br>GN=ARFGAP3<br>PE=1 SV=1 - [ARFG3_HUMAN] | 30.81 | 1 | 17 | 17 | 52 | 0.841 | 0.916 | 0.825 | 0.798 | 95.55  | 30.81 | 24 | 52 | 516  | 56.9  | 7.36 |
| Q8NAT2 | Tudor domain-containing protein 5<br>OS=Homo sapiens<br>GN=TDRD5<br>PE=1 SV=3 - [TDRD5_HUMAN]                     | 1.63  | 1 | 2  | 2  | 9  | 0.662 | 1.087 | 1.300 | 0.798 | 17.85  | 1.63  | 3  | 9  | 981  | 109.7 | 8.02 |
| Q969G5 | Protein kinase C delta-binding protein<br>OS=Homo sapiens<br>GN=PRKCDBP<br>PE=1 SV=3 - [PRDCBP_HUMAN]             | 23.75 | 1 | 7  | 7  | 69 | 1.304 | 0.674 | 1.193 | 0.798 | 166.87 | 23.75 | 13 | 69 | 261  | 27.7  | 6.43 |
| Q13129 | Zinc finger protein Rlf<br>OS=Homo sapiens<br>GN=RLF PE=1 SV=2 - [RLF_HUMAN]                                      | 0.63  | 1 | 1  | 2  | 3  | 1.352 | 1.084 | 0.846 | 0.799 | 6.49   | 0.63  | 2  | 3  | 1914 | 217.8 | 6.77 |
| Q2M2I8 | AP2-associated protein kinase 1<br>OS=Homo sapiens<br>GN=AAK1<br>PE=1 SV=3 - [AAK1_HUMAN]                         | 19.46 | 1 | 14 | 15 | 47 | 0.996 | 0.895 | 1.041 | 0.799 | 130.77 | 19.46 | 24 | 47 | 961  | 103.8 | 6.60 |
| Q96IZ0 | PRKC apoptosis WT1 regulator protein<br>OS=Homo sapiens<br>GN=PAWR<br>PE=1 SV=1 - [PAWR_HUMAN]                    | 29.12 | 1 | 6  | 8  | 48 | 0.981 | 0.763 | 1.027 | 0.799 | 146.39 | 29.12 | 14 | 48 | 340  | 36.5  | 5.41 |
| Q96A26 | Protein FAM162A<br>OS=Homo sapiens<br>GN=FAM162A<br>PE=1 SV=2 - [F162A_HUMAN]                                     | 25.32 | 1 | 3  | 3  | 12 | 1.078 | 1.441 | 0.784 | 0.799 | 30.65  | 25.32 | 4  | 12 | 154  | 17.3  | 9.77 |
| P34896 | Serine hydroxymethyltransferase, cytosolic<br>OS=Homo sapiens<br>GN=SHMT1<br>PE=1 SV=1 - [GLYC_HUMAN]             | 6.00  | 1 | 1  | 2  | 3  | 1.366 | 0.780 | 0.795 | 0.799 | 3.74   | 6.00  | 2  | 3  | 483  | 53.0  | 7.71 |

|        |                                                                                                                                                                                                                                                   |       |   |    |    |     |       |       |       |       |        |       |    |     |      |       |      |
|--------|---------------------------------------------------------------------------------------------------------------------------------------------------------------------------------------------------------------------------------------------------|-------|---|----|----|-----|-------|-------|-------|-------|--------|-------|----|-----|------|-------|------|
| O60346 | PH domain<br>leucine-rich<br>repeat-<br>containing<br>protein<br>phosphatase 1<br>OS=Homo<br>sapiens<br>GN=PHLPP1<br>PE=1 SV=3 -<br>[PHLP1_HUMAN<br>]<br>Thymosin beta-<br>10 OS=Homo<br>sapiens<br>GN=TMSB10<br>PE=1 SV=2 -<br>[TYB10_HUMAN<br>] | 1.16  | 1 | 1  | 3  | 4   | 0.992 | 1.111 | 1.247 | 0.800 | 0.00   | 1.16  | 3  | 4   | 1717 | 184.6 | 6.28 |
| P63313 | Hermansky-<br>Pudlak<br>syndrome 1<br>protein<br>OS=Homo<br>sapiens<br>GN=HPS1<br>PE=1 SV=2 -<br>[HPS1_HUMAN]                                                                                                                                     | 52.27 | 1 | 6  | 9  | 160 | 1.227 | 1.068 | 0.783 | 0.800 | 377.78 | 52.27 | 14 | 160 | 44   | 5.0   | 5.36 |
| Q92902 | Alcohol<br>dehydrogenase<br>class-3<br>OS=Homo<br>sapiens<br>GN=ADH5<br>PE=1 SV=4 -<br>[ADH5_HUMAN]                                                                                                                                               | 3.29  | 1 | 2  | 2  | 3   | 0.843 | 0.888 | 0.874 | 0.800 | 5.44   | 3.29  | 3  | 3   | 700  | 79.2  | 5.91 |
| P11766 | Ubiquitin-2<br>OS=Homo<br>sapiens<br>GN=UBQLN2<br>PE=1 SV=2 -<br>[UBQL2_HUMAN<br>]                                                                                                                                                                | 35.29 | 1 | 15 | 15 | 138 | 1.057 | 0.845 | 1.104 | 0.800 | 360.63 | 35.29 | 24 | 138 | 374  | 39.7  | 7.49 |
| Q9UHD9 | Receptor<br>expression-<br>enhancing<br>protein 4<br>OS=Homo<br>sapiens<br>GN=REEP4<br>PE=1 SV=1 -<br>[REEP4_HUMAN<br>]                                                                                                                           | 20.03 | 1 | 4  | 8  | 70  | 0.763 | 1.414 | 0.904 | 0.800 | 162.64 | 20.03 | 13 | 70  | 624  | 65.7  | 5.22 |
| Q9H6H4 | Ubiquitin<br>carboxyl-<br>terminal<br>hydrolase 15<br>OS=Homo<br>sapiens<br>GN=USP15<br>PE=1 SV=3 -<br>[UBP15_HUMAN<br>]                                                                                                                          | 8.95  | 1 | 1  | 1  | 2   | 0.811 | 2.020 | 2.375 | 0.800 | 10.27  | 8.95  | 1  | 2   | 257  | 29.4  | 9.73 |
| Q9Y4E8 | Armadillo<br>repeat-<br>containing<br>protein 4<br>OS=Homo<br>sapiens<br>GN=ARMC4<br>PE=1 SV=1 -<br>[ARMC4_HUMA                                                                                                                                   | 5.91  | 1 | 7  | 7  | 24  | 0.994 | 0.917 | 0.981 | 0.800 | 50.51  | 5.91  | 11 | 24  | 981  | 112.3 | 5.22 |
| Q5T2S8 |                                                                                                                                                                                                                                                   | 1.15  | 1 | 1  | 1  | 1   | 0.596 | 0.722 | 0.467 | 0.800 | 1.94   | 1.15  | 1  | 1   | 1044 | 115.6 | 7.77 |

|        |                                                                                                           |       |   |    |    |     |       |       |       |       |         |       |    |     |      |       |       |
|--------|-----------------------------------------------------------------------------------------------------------|-------|---|----|----|-----|-------|-------|-------|-------|---------|-------|----|-----|------|-------|-------|
| Q6PID6 | Tetratricopeptide repeat protein 33<br>OS=Homo sapiens<br>GN=TTC33<br>PE=1 SV=2 - [TTC33_HUMAN]           | 4.20  | 1 | 1  | 1  | 1   | 0.845 | 1.001 | 1.064 | 0.800 | 2.52    | 4.20  | 1  | 1   | 262  | 29.4  | 5.44  |
| O15118 | Niemann-Pick C1 protein<br>OS=Homo sapiens<br>GN=NPC1<br>PE=1 SV=2 - [NPC1_HUMAN]                         | 5.71  | 2 | 7  | 7  | 18  | 0.939 | 0.477 | 0.480 | 0.800 | 34.14   | 5.71  | 10 | 18  | 1278 | 142.1 | 5.36  |
| Q8TF01 | Arginine/serine-rich protein<br>PNISR<br>OS=Homo sapiens<br>GN=PNISR<br>PE=1 SV=2 - [PNISR_HUMAN]         | 1.61  | 1 | 1  | 1  | 2   | 1.289 | 1.226 | 1.817 | 0.801 | 4.16    | 1.61  | 1  | 2   | 805  | 92.5  | 10.02 |
| P29218 | Inositol monophosphatase 1<br>OS=Homo sapiens<br>GN=IMPA1<br>PE=1 SV=1 - [IMPA1_HUMAN]                    | 36.46 | 1 | 11 | 11 | 37  | 1.315 | 1.338 | 1.013 | 0.801 | 82.71   | 36.46 | 18 | 37  | 277  | 30.2  | 5.26  |
| Q9HB90 | Ras-related GTP-binding protein C<br>OS=Homo sapiens<br>GN=RRAGC<br>PE=1 SV=1 - [RRAGC_HUMAN]             | 9.02  | 2 | 4  | 4  | 8   | 0.724 | 0.643 | 0.696 | 0.801 | 12.90   | 9.02  | 6  | 8   | 399  | 44.2  | 5.10  |
| Q96JG8 | Melanoma-associated antigen D4<br>OS=Homo sapiens<br>GN=MAGED4<br>PE=1 SV=3 - [MAGED4_HUMAN]              | 5.13  | 1 | 2  | 2  | 4   | 2.280 | 1.406 | 3.010 | 0.801 | 15.87   | 5.13  | 2  | 4   | 741  | 81.3  | 6.79  |
| P63241 | Eukaryotic translation initiation factor 5A-1<br>OS=Homo sapiens<br>GN=EIF5A<br>PE=1 SV=2 - [IF5A1_HUMAN] | 72.08 | 2 | 7  | 15 | 389 | 0.845 | 0.766 | 0.804 | 0.801 | 1211.25 | 72.08 | 25 | 389 | 154  | 16.8  | 5.24  |
| Q9BUL8 | Programmed cell death protein 10<br>OS=Homo sapiens<br>GN=PDCD10<br>PE=1 SV=1 - [PDC10_HUMAN]             | 19.81 | 1 | 5  | 5  | 15  | 1.083 | 1.045 | 1.131 | 0.801 | 26.74   | 19.81 | 8  | 15  | 212  | 24.7  | 8.19  |
| Q9BYP7 | Serine/threonine-protein kinase WNK3<br>OS=Homo sapiens<br>GN=WNK3<br>PE=1 SV=3 - [WNK3_HUMAN]            | 2.78  | 2 | 2  | 6  | 21  | 1.075 | 1.130 | 0.877 | 0.801 | 38.24   | 2.78  | 10 | 21  | 1800 | 198.3 | 6.07  |

|        |                                                                                               |       |   |    |    |     |       |       |       |       |         |       |     |     |      |       |      |
|--------|-----------------------------------------------------------------------------------------------|-------|---|----|----|-----|-------|-------|-------|-------|---------|-------|-----|-----|------|-------|------|
| Q9NZW5 | MAGUK p55 subfamily member 6<br>OS=Homo sapiens<br>GN=MPP6<br>PE=1 SV=2 - [MPP6_HUMAN]        | 24.26 | 1 | 12 | 13 | 47  | 0.642 | 1.016 | 0.801 | 0.801 | 102.71  | 24.26 | 21  | 47  | 540  | 61.1  | 6.18 |
| Q5T4S7 | E3 ubiquitin-protein ligase UBR4<br>OS=Homo sapiens<br>GN=UBR4<br>PE=1 SV=1 - [UBR4_HUMAN]    | 14.12 | 1 | 67 | 68 | 213 | 0.897 | 0.748 | 0.877 | 0.802 | 467.99  | 14.12 | 105 | 213 | 5183 | 573.5 | 6.04 |
| Q9BXK5 | Bcl-2-like protein 13<br>OS=Homo sapiens<br>GN=BCL2L13<br>PE=1 SV=1 - [B2L13_HUMAN]           | 21.86 | 1 | 9  | 9  | 38  | 0.987 | 0.623 | 0.933 | 0.802 | 63.81   | 21.86 | 16  | 38  | 485  | 52.7  | 4.44 |
| P27816 | Microtubule-associated protein 4<br>OS=Homo sapiens<br>GN=MAP4<br>PE=1 SV=3 - [MAP4_HUMAN]    | 64.84 | 1 | 74 | 76 | 861 | 1.022 | 1.157 | 1.186 | 0.802 | 1983.99 | 64.84 | 128 | 861 | 1152 | 120.9 | 5.43 |
| O75695 | Protein XRP2<br>OS=Homo sapiens<br>GN=RP2 PE=1 SV=4 - [XRP2_HUMAN]                            | 18.00 | 1 | 6  | 6  | 9   | 1.187 | 0.727 | 0.734 | 0.802 | 16.74   | 18.00 | 7   | 9   | 350  | 39.6  | 5.12 |
| Q969U7 | Proteasome assembly chaperone 2<br>OS=Homo sapiens<br>GN=PSMG2<br>PE=1 SV=1 - [PSMG2_HUMAN]   | 3.41  | 1 | 1  | 1  | 3   | 0.935 | 0.738 | 0.902 | 0.802 | 6.45    | 3.41  | 2   | 3   | 264  | 29.4  | 6.98 |
| P27361 | Mitogen-activated protein kinase 3<br>OS=Homo sapiens<br>GN=MAPK3<br>PE=1 SV=4 - [MK03_HUMAN] | 42.74 | 8 | 11 | 16 | 122 | 0.958 | 0.708 | 1.057 | 0.802 | 268.54  | 42.74 | 29  | 122 | 379  | 43.1  | 6.74 |
| Q6PKG0 | La-related protein 1<br>OS=Homo sapiens<br>GN=LARP1<br>PE=1 SV=2 - [LARP1_HUMAN]              | 21.90 | 2 | 19 | 19 | 64  | 0.760 | 0.820 | 0.713 | 0.802 | 170.08  | 21.90 | 32  | 64  | 1096 | 123.4 | 8.82 |
| Q9BUF5 | Tubulin beta-6 chain<br>OS=Homo sapiens<br>GN=TUBB6<br>PE=1 SV=1 - [TBB6_HUMAN]               | 58.74 | 2 | 12 | 22 | 609 | 1.172 | 0.861 | 1.199 | 0.802 | 1548.07 | 58.74 | 39  | 609 | 446  | 49.8  | 4.88 |



|        |                                                                                                                   |       |   |    |    |     |       |       |       |       |        |       |     |     |      |       |      |
|--------|-------------------------------------------------------------------------------------------------------------------|-------|---|----|----|-----|-------|-------|-------|-------|--------|-------|-----|-----|------|-------|------|
| Q9UKU9 | Angiopoietin-related protein 2 OS=Homo sapiens GN=ANGPTL2 PE=2 SV=1 - [ANGL2_HUMAN]                               | 7.10  | 1 | 3  | 3  | 10  | 0.973 | 0.837 | 0.683 | 0.803 | 14.99  | 7.10  | 3   | 10  | 493  | 57.1  | 7.53 |
| Q6SZW1 | Sterile alpha and TIR motif-containing protein 1 OS=Homo sapiens GN=SARM1 PE=1 SV=1 - [SARM1_HUMAN]               | 12.15 | 1 | 7  | 7  | 12  | 1.185 | 0.501 | 0.807 | 0.803 | 34.72  | 12.15 | 9   | 12  | 724  | 79.3  | 6.55 |
| O60477 | BMP/retinoic acid-inducible neural-specific protein 1 OS=Homo sapiens GN=BRINP1 PE=1 SV=2 - [BRNP1_HUMAN]         | 1.18  | 1 | 1  | 1  | 1   | 0.763 | 0.752 | 0.803 | 0.803 | 2.14   | 1.18  | 1   | 1   | 761  | 88.7  | 8.91 |
| Q6P996 | Pyridoxal-dependent decarboxylase domain-containing protein 1 OS=Homo sapiens GN=PDXDC1 PE=1 SV=2 - [PDXD1_HUMAN] | 22.59 | 2 | 14 | 14 | 52  | 0.715 | 0.715 | 0.776 | 0.803 | 148.16 | 22.59 | 21  | 52  | 788  | 86.7  | 5.38 |
| Q8WW11 | LIM domain only protein 7 OS=Homo sapiens GN=LMO7 PE=1 SV=3 - [LMO7_HUMAN]                                        | 37.55 | 1 | 59 | 59 | 296 | 0.845 | 0.688 | 1.004 | 0.804 | 682.26 | 37.55 | 101 | 296 | 1683 | 192.6 | 8.09 |
| Q9BTY2 | Plasma alpha-L-fucosidase OS=Homo sapiens GN=FUCA2 PE=1 SV=2 - [FUCCO2_HUMAN]                                     | 15.85 | 1 | 8  | 8  | 18  | 0.603 | 0.920 | 0.709 | 0.804 | 48.64  | 15.85 | 13  | 18  | 467  | 54.0  | 6.25 |
| O95239 | Chromosome-associated kinesin KIF4A OS=Homo sapiens GN=KIF4A PE=1 SV=3 - [KIF4A_HUMAN]                            | 6.90  | 1 | 6  | 7  | 12  | 1.070 | 0.927 | 0.897 | 0.804 | 32.30  | 6.90  | 7   | 12  | 1232 | 139.8 | 6.27 |
| Q9BYK8 | Helicase with zinc finger domain 2 OS=Homo sapiens GN=HELZ2 PE=1 SV=6 - [HELZ2_HUMAN]                             | 3.21  | 1 | 5  | 7  | 13  | 1.574 | 0.926 | 0.966 | 0.804 | 16.47  | 3.21  | 7   | 13  | 2649 | 294.5 | 7.49 |

|        |                                                                                                                            |       |   |    |    |     |       |       |       |       |        |       |    |     |      |       |      |
|--------|----------------------------------------------------------------------------------------------------------------------------|-------|---|----|----|-----|-------|-------|-------|-------|--------|-------|----|-----|------|-------|------|
| Q460N3 | Poly [ADP-ribose] polymerase 15<br>OS=Homo sapiens<br>GN=PARP15<br>PE=1 SV=2 - [PAR15_HUMAN]                               | 1.77  | 1 | 1  | 1  | 1   | 1.437 | 1.094 | 1.406 | 0.804 | 1.95   | 1.77  | 1  | 1   | 678  | 74.5  | 8.82 |
| Q969X5 | Endoplasmic reticulum-Golgi intermediate compartment protein 1<br>OS=Homo sapiens<br>GN=ERGIC1<br>PE=1 SV=1 - [ERG1_HUMAN] | 25.86 | 1 | 6  | 6  | 26  | 0.647 | 0.676 | 0.824 | 0.804 | 54.43  | 25.86 | 10 | 26  | 290  | 32.6  | 7.06 |
| P53396 | ATP-dttrate synthase<br>OS=Homo sapiens<br>GN=ACLY PE=1 SV=3 - [ACLY_HUMAN]                                                | 40.87 | 1 | 41 | 41 | 193 | 0.949 | 0.659 | 0.994 | 0.804 | 506.39 | 40.87 | 69 | 193 | 1101 | 120.8 | 7.33 |
| Q5T7M9 | Protein FAM69A<br>OS=Homo sapiens<br>GN=FAM69A<br>PE=2 SV=1 - [FA69A_HUMAN]                                                | 6.54  | 1 | 3  | 3  | 8   | 0.746 | 0.671 | 0.848 | 0.805 | 19.26  | 6.54  | 3  | 8   | 428  | 49.0  | 7.17 |
| O60941 | Dystrobrevin beta<br>OS=Homo sapiens<br>GN=DTNB<br>PE=1 SV=1 - [DTNB_HUMAN]                                                | 5.74  | 1 | 1  | 4  | 8   | 0.801 | 1.428 | 1.248 | 0.805 | 13.28  | 5.74  | 5  | 8   | 627  | 71.3  | 7.91 |
| O95822 | Malonyl-CoA decarboxylase, mitochondrial<br>OS=Homo sapiens<br>GN=MLYCD<br>PE=1 SV=3 - [DCMC_HUMAN]                        | 12.37 | 1 | 4  | 5  | 9   | 0.836 | 0.922 | 1.144 | 0.805 | 16.85  | 12.37 | 7  | 9   | 493  | 55.0  | 8.95 |
| P20073 | Annexin A7<br>OS=Homo sapiens<br>GN=ANXA7<br>PE=1 SV=3 - [ANXA7_HUMAN]                                                     | 28.07 | 1 | 13 | 14 | 70  | 0.905 | 1.109 | 1.105 | 0.805 | 184.46 | 28.07 | 19 | 70  | 488  | 52.7  | 5.68 |
| Q7Z6Z7 | E3 ubiquitin-protein ligase HUWE1<br>OS=Homo sapiens<br>GN=HUWE1<br>PE=1 SV=3 - [HUWE1_HUMAN]                              | 11.07 | 1 | 46 | 46 | 126 | 0.864 | 1.044 | 1.127 | 0.805 | 301.89 | 11.07 | 69 | 126 | 4374 | 481.6 | 5.22 |
| Q96T83 | Sodium/hydrogen exchanger 7<br>OS=Homo sapiens<br>GN=SLC9A7<br>PE=1 SV=1 - [SL9A7_HUMAN]                                   | 4.00  | 1 | 2  | 2  | 4   | 0.459 | 0.601 | 1.000 | 0.805 | 11.29  | 4.00  | 4  | 4   | 725  | 80.1  | 6.42 |

|        |                                                                                                     |       |   |    |    |    |       |       |       |       |        |       |    |    |     |      |      |
|--------|-----------------------------------------------------------------------------------------------------|-------|---|----|----|----|-------|-------|-------|-------|--------|-------|----|----|-----|------|------|
| O43299 | AP-5 complex subunit zeta-1<br>OS=Homo sapiens<br>GN=AP5Z1<br>PE=1 SV=2 - [AP5Z1_HUMAN]             | 2.97  | 1 | 2  | 2  | 2  | 0.950 | 1.330 | 1.517 | 0.805 | 2.28   | 2.97  | 2  | 2  | 807 | 88.5 | 7.01 |
| P84157 | Matrix-remodeling-associated protein 7<br>OS=Homo sapiens<br>GN=MXRA7<br>PE=1 SV=1 - [MXRA7_HUMAN]  | 27.94 | 1 | 5  | 5  | 49 | 0.965 | 0.711 | 0.763 | 0.805 | 96.14  | 27.94 | 8  | 49 | 204 | 21.5 | 4.26 |
| P11171 | Protein 4.1<br>OS=Homo sapiens<br>GN=EPB41<br>PE=1 SV=4 - [41_HUMAN]                                | 10.30 | 1 | 7  | 7  | 27 | 0.561 | 1.251 | 1.298 | 0.805 | 69.87  | 10.30 | 9  | 27 | 864 | 97.0 | 5.58 |
| P04066 | Tissue alpha-L-fucosidase<br>OS=Homo sapiens<br>GN=FUCA1<br>PE=1 SV=4 - [FUCA_HUMAN]                | 7.51  | 1 | 3  | 3  | 6  | 0.744 | 1.664 | 0.819 | 0.806 | 12.91  | 7.51  | 4  | 6  | 466 | 53.7 | 6.84 |
| P09228 | Cystatin-SA<br>OS=Homo sapiens<br>GN=CST2<br>PE=1 SV=1 - [CYTT_HUMAN]                               | 10.64 | 1 | 1  | 1  | 1  | 1.071 | 1.049 | 1.719 | 0.806 | 3.61   | 10.64 | 1  | 1  | 141 | 16.4 | 4.93 |
| Q6F181 | Anamorsin<br>OS=Homo sapiens<br>GN=CIAPIN1<br>PE=1 SV=2 - [CPINI_HUMAN]                             | 29.17 | 1 | 10 | 10 | 39 | 1.065 | 0.720 | 0.713 | 0.806 | 76.66  | 29.17 | 15 | 39 | 312 | 33.6 | 5.62 |
| P42126 | Enoyl-CoA delta isomerase 1, mitochondrial<br>OS=Homo sapiens<br>GN=ECI1 PE=1 SV=1 - [ECI1_HUMAN]   | 20.86 | 1 | 6  | 6  | 34 | 0.978 | 1.068 | 1.000 | 0.806 | 63.79  | 20.86 | 11 | 34 | 302 | 32.8 | 8.54 |
| P35080 | Profilin-2<br>OS=Homo sapiens<br>GN=PFN2<br>PE=1 SV=3 - [PROF2_HUMAN]                               | 36.43 | 1 | 6  | 6  | 45 | 1.001 | 0.790 | 0.978 | 0.806 | 113.38 | 36.43 | 11 | 45 | 140 | 15.0 | 6.99 |
| Q9UBD5 | Origin recognition complex subunit 3<br>OS=Homo sapiens<br>GN=ORC3<br>PE=1 SV=1 - [ORC3_HUMAN]      | 3.94  | 1 | 1  | 3  | 3  | 0.991 | 1.064 | 0.863 | 0.806 | 2.11   | 3.94  | 3  | 3  | 711 | 82.2 | 7.61 |
| Q9Y3E5 | Peptidyl-tRNA hydrolase 2, mitochondrial<br>OS=Homo sapiens<br>GN=PTRH2<br>PE=1 SV=1 - [PTH2_HUMAN] | 17.32 | 1 | 3  | 3  | 7  | 0.940 | 0.707 | 0.798 | 0.806 | 22.31  | 17.32 | 5  | 7  | 179 | 19.2 | 8.73 |

|        |                                                                                                         |       |   |    |    |    |       |       |       |       |        |       |    |    |      |       |      |
|--------|---------------------------------------------------------------------------------------------------------|-------|---|----|----|----|-------|-------|-------|-------|--------|-------|----|----|------|-------|------|
| Q9UHG3 | Prenylcysteine oxidase 1<br>OS=Homo sapiens<br>GN=PCYOX1<br>PE=1 SV=3 - [PCYOX_HUMAN]                   | 30.50 | 1 | 15 | 15 | 70 | 0.992 | 0.637 | 0.729 | 0.806 | 187.22 | 30.50 | 24 | 70 | 505  | 56.6  | 6.18 |
| Q03393 | 6-pyruvoyl tetrahydrobiopterin synthase<br>OS=Homo sapiens<br>GN=PTS PE=1<br>SV=1 - [PTPS_HUMAN]        | 15.17 | 1 | 2  | 2  | 4  | 1.927 | 0.762 | 0.700 | 0.806 | 11.63  | 15.17 | 3  | 4  | 145  | 16.4  | 6.68 |
| O43747 | AP-1 complex subunit gamma-1<br>OS=Homo sapiens<br>GN=AP1G1<br>PE=1 SV=5 - [AP1G1_HUMAN]                | 13.50 | 3 | 12 | 14 | 52 | 0.900 | 0.663 | 0.849 | 0.806 | 123.29 | 13.50 | 22 | 52 | 822  | 91.3  | 6.80 |
| Q96PY6 | Serine/threonine-protein kinase Nek1<br>OS=Homo sapiens<br>GN=NEK1<br>PE=1 SV=2 - [NEK1_HUMAN]          | 2.86  | 1 | 4  | 4  | 6  | 0.932 | 1.214 | 0.985 | 0.807 | 8.39   | 2.86  | 6  | 6  | 1258 | 142.7 | 5.94 |
| Q15327 | Ankyrin repeat domain-containing protein 1<br>OS=Homo sapiens<br>GN=ANKRD1<br>PE=1 SV=2 - [ANKR1_HUMAN] | 6.27  | 1 | 1  | 2  | 2  | 1.114 | 0.274 | 0.359 | 0.807 | 1.82   | 6.27  | 2  | 2  | 319  | 36.2  | 7.50 |
| Q96FQ6 | Protein S100-A16<br>OS=Homo sapiens<br>GN=S100A16<br>PE=1 SV=1 - [S10AG_HUMAN]                          | 38.83 | 1 | 5  | 5  | 49 | 0.605 | 0.852 | 1.293 | 0.807 | 137.75 | 38.83 | 9  | 49 | 103  | 11.8  | 6.79 |
| Q8NEU8 | DCC-interacting protein 13-beta<br>OS=Homo sapiens<br>GN=APPL2<br>PE=1 SV=3 - [DP13B_HUMAN]             | 27.41 | 1 | 14 | 14 | 25 | 0.618 | 0.944 | 0.920 | 0.807 | 70.89  | 27.41 | 20 | 25 | 664  | 74.4  | 4.94 |
| A7E2Y1 | Myosin-7B<br>OS=Homo sapiens<br>GN=MYH7B<br>PE=1 SV=3 - [MYH7B_HUMAN]                                   | 2.99  | 4 | 2  | 8  | 70 | 0.866 | 1.086 | 0.886 | 0.807 | 123.95 | 2.99  | 9  | 70 | 1941 | 221.3 | 6.01 |
| Q9P0J7 | E3 ubiquitin-protein ligase KCMF1<br>OS=Homo sapiens<br>GN=KCMF1<br>PE=1 SV=2 - [KCMF1_HUMAN]           | 10.24 | 1 | 3  | 3  | 9  | 1.256 | 0.867 | 1.060 | 0.808 | 21.12  | 10.24 | 4  | 9  | 381  | 41.9  | 5.66 |

|        |                                                                                                                                                                                                                                                                                                                                                                                                                                                                                                |       |   |    |    |    |       |       |       |       |        |       |    |     |      |       |      |
|--------|------------------------------------------------------------------------------------------------------------------------------------------------------------------------------------------------------------------------------------------------------------------------------------------------------------------------------------------------------------------------------------------------------------------------------------------------------------------------------------------------|-------|---|----|----|----|-------|-------|-------|-------|--------|-------|----|-----|------|-------|------|
| P63092 | Guanine<br>nucleotide-<br>binding protein<br>C(s) subunit<br>alpha isoforms<br>short<br>OS=Homo<br>sapiens<br>GN=GNAS<br>PE=1 SV=1 -<br>[GNAS2_HUMAN<br>]<br>GON-4-like<br>protein<br>OS=Homo<br>sapiens<br>GN=GON4L<br>PE=1 SV=1 -<br>[GON4L_HUMAN<br>]<br>Signal<br>recognition<br>particle<br>receptor<br>subunit beta<br>OS=Homo<br>sapiens<br>GN=SRPRB<br>PE=1 SV=3 -<br>[SRPRB_HUMAN<br>]<br>Transcription<br>factor p65<br>OS=Homo<br>sapiens<br>GN=RELA PE=1<br>SV=2 -<br>[TF65_HUMAN] | 28.93 | 2 | 9  | 10 | 70 | 0.971 | 1.080 | 1.042 | 0.808 | 185.31 | 28.93 | 16 | 70  | 394  | 45.6  | 5.82 |
| Q3T8J9 | Guanine<br>nucleotide-<br>binding protein<br>C(s) subunit<br>alpha isoforms<br>short<br>OS=Homo<br>sapiens<br>GN=GNAS<br>PE=1 SV=1 -<br>[GNAS2_HUMAN<br>]<br>GON-4-like<br>protein<br>OS=Homo<br>sapiens<br>GN=GON4L<br>PE=1 SV=1 -<br>[GON4L_HUMAN<br>]<br>Signal<br>recognition<br>particle<br>receptor<br>subunit beta<br>OS=Homo<br>sapiens<br>GN=SRPRB<br>PE=1 SV=3 -<br>[SRPRB_HUMAN<br>]<br>Transcription<br>factor p65<br>OS=Homo<br>sapiens<br>GN=RELA PE=1<br>SV=2 -<br>[TF65_HUMAN] | 0.94  | 2 | 3  | 3  | 4  | 1.061 | 1.032 | 0.958 | 0.808 | 9.07   | 0.94  | 3  | 4   | 2241 | 248.5 | 5.01 |
| Q9Y5M8 | Guanine<br>nucleotide-<br>binding protein<br>C(s) subunit<br>alpha isoforms<br>short<br>OS=Homo<br>sapiens<br>GN=GNAS<br>PE=1 SV=1 -<br>[GNAS2_HUMAN<br>]<br>GON-4-like<br>protein<br>OS=Homo<br>sapiens<br>GN=GON4L<br>PE=1 SV=1 -<br>[GON4L_HUMAN<br>]<br>Signal<br>recognition<br>particle<br>receptor<br>subunit beta<br>OS=Homo<br>sapiens<br>GN=SRPRB<br>PE=1 SV=3 -<br>[SRPRB_HUMAN<br>]<br>Transcription<br>factor p65<br>OS=Homo<br>sapiens<br>GN=RELA PE=1<br>SV=2 -<br>[TF65_HUMAN] | 49.45 | 1 | 13 | 13 | 39 | 0.645 | 0.749 | 0.840 | 0.808 | 96.53  | 49.45 | 18 | 39  | 271  | 29.7  | 9.04 |
| Q04206 | Guanine<br>nucleotide-<br>binding protein<br>C(s) subunit<br>alpha isoforms<br>short<br>OS=Homo<br>sapiens<br>GN=GNAS<br>PE=1 SV=1 -<br>[GNAS2_HUMAN<br>]<br>GON-4-like<br>protein<br>OS=Homo<br>sapiens<br>GN=GON4L<br>PE=1 SV=1 -<br>[GON4L_HUMAN<br>]<br>Signal<br>recognition<br>particle<br>receptor<br>subunit beta<br>OS=Homo<br>sapiens<br>GN=SRPRB<br>PE=1 SV=3 -<br>[SRPRB_HUMAN<br>]<br>Transcription<br>factor p65<br>OS=Homo<br>sapiens<br>GN=RELA PE=1<br>SV=2 -<br>[TF65_HUMAN] | 22.50 | 1 | 12 | 12 | 36 | 0.827 | 0.824 | 0.957 | 0.808 | 89.61  | 22.50 | 20 | 36  | 551  | 60.2  | 5.68 |
| Q9H9G7 | Protein<br>argonaute-3<br>OS=Homo<br>sapiens<br>GN=AGO3<br>PE=1 SV=2 -<br>[AGO3_HUMAN]                                                                                                                                                                                                                                                                                                                                                                                                         | 7.09  | 2 | 1  | 5  | 11 | 1.195 | 1.078 | 1.621 | 0.808 | 22.95  | 7.09  | 7  | 11  | 860  | 97.3  | 9.11 |
| P78310 | Coxsackievirus<br>and adenovirus<br>receptor<br>OS=Homo<br>sapiens<br>GN=CXADR<br>PE=1 SV=1 -<br>[CXAR_HUMAN]                                                                                                                                                                                                                                                                                                                                                                                  | 3.56  | 1 | 1  | 1  | 1  | 1.419 | 0.529 | 1.183 | 0.808 | 1.75   | 3.56  | 1  | 1   | 365  | 40.0  | 7.56 |
| Q8IWE4 | DCN1-like<br>protein 3<br>OS=Homo<br>sapiens<br>GN=DCUNID3<br>PE=1 SV=1 -<br>[DCNL3_HUMAN<br>]                                                                                                                                                                                                                                                                                                                                                                                                 | 8.55  | 1 | 2  | 2  | 3  | 0.805 | 0.739 | 1.003 | 0.808 | 11.83  | 8.55  | 2  | 3   | 304  | 34.3  | 5.12 |
| Q9BX50 | Collagen alpha-<br>1(XXV) chain<br>OS=Homo<br>sapiens<br>GN=COL25A1<br>PE=1 SV=2 -<br>[COPA1_HUMA<br>N]                                                                                                                                                                                                                                                                                                                                                                                        | 3.36  | 1 | 1  | 1  | 4  | 1.467 | 0.528 | 1.574 | 0.808 | 0.00   | 3.36  | 1  | 4   | 654  | 64.7  | 8.40 |
| Q7Z2T5 | TRMT1-like<br>protein<br>OS=Homo<br>sapiens<br>GN=TRMT1L<br>PE=1 SV=2 -<br>[TRM1L_HUMAN<br>]                                                                                                                                                                                                                                                                                                                                                                                                   | 4.77  | 1 | 2  | 2  | 2  | 1.129 |       | 0.808 | 7.78  | 4.77   | 2     | 2  | 733 | 81.7 | 7.88  |      |

|        |                                                                                                              |       |   |    |    |     |       |       |       |       |        |       |    |     |     |      |      |
|--------|--------------------------------------------------------------------------------------------------------------|-------|---|----|----|-----|-------|-------|-------|-------|--------|-------|----|-----|-----|------|------|
| P56385 | ATP synthase subunit e, mitochondrial<br>OS=Homo sapiens<br>GN=ATP5I<br>PE=1 SV=2 - [ATP5I_HUMAN]            | 31.88 | 1 | 2  | 2  | 8   | 1.171 | 1.125 | 0.757 | 0.809 | 20.05  | 31.88 | 4  | 8   | 69  | 7.9  | 9.35 |
| P08240 | Signal recognition particle receptor subunit alpha<br>OS=Homo sapiens<br>GN=SRPR<br>PE=1 SV=2 - [SRPR_HUMAN] | 41.54 | 2 | 26 | 26 | 83  | 0.766 | 0.971 | 0.913 | 0.809 | 203.55 | 41.54 | 40 | 83  | 638 | 69.8 | 8.95 |
| O15143 | Actin-related protein 2/3 complex subunit 1B<br>OS=Homo sapiens<br>GN=ARPC1B<br>PE=1 SV=3 - [ARPC1B_HUMAN]   | 39.52 | 1 | 12 | 12 | 150 | 0.985 | 0.979 | 1.130 | 0.809 | 367.25 | 39.52 | 20 | 150 | 372 | 40.9 | 8.35 |
| P05154 | Plasma serine protease inhibitor<br>OS=Homo sapiens<br>GN=SERPINA5<br>PE=1 SV=3 - [IPSP_HUMAN]               | 4.43  | 1 | 1  | 2  | 5   | 0.933 | 0.437 | 1.284 | 0.809 | 5.69   | 4.43  | 2  | 5   | 406 | 45.6 | 9.26 |
| O15484 | Calpain-5<br>OS=Homo sapiens<br>GN=CAPN5<br>PE=1 SV=2 - [CAPN5_HUMAN]                                        | 5.63  | 1 | 4  | 4  | 15  | 0.899 | 1.233 | 1.010 | 0.809 | 25.51  | 5.63  | 6  | 15  | 640 | 73.1 | 7.64 |
| Q9UHD8 | Septin-9<br>OS=Homo sapiens<br>GN=SEPT9<br>PE=1 SV=2 - [SEPT9_HUMAN]                                         | 55.29 | 1 | 30 | 31 | 289 | 0.886 | 1.213 | 1.459 | 0.809 | 768.28 | 55.29 | 52 | 289 | 586 | 65.4 | 8.97 |
| P0CG29 | Glutathione S-transferase theta-2<br>OS=Homo sapiens<br>GN=GSTT2<br>PE=1 SV=1 - [GST2_HUMAN]                 | 29.92 | 2 | 6  | 7  | 18  | 0.848 | 0.798 | 1.014 | 0.809 | 40.40  | 29.92 | 11 | 18  | 244 | 27.5 | 7.02 |
| Q00013 | 55 kDa erythrocyte membrane protein<br>OS=Homo sapiens<br>GN=MPP1<br>PE=1 SV=2 - [EM55_HUMAN]                | 12.23 | 1 | 5  | 5  | 16  | 0.780 | 1.171 | 0.980 | 0.809 | 34.78  | 12.23 | 7  | 16  | 466 | 52.3 | 7.37 |
| Q13867 | Bleomycin hydrolase<br>OS=Homo sapiens<br>GN=BLMH<br>PE=1 SV=1 - [BLMH_HUMAN]                                | 20.00 | 1 | 8  | 8  | 28  | 0.701 | 0.983 | 0.731 | 0.810 | 50.01  | 20.00 | 14 | 28  | 455 | 52.5 | 6.27 |

|        |                                                                                                                                                                                                                            |       |   |    |    |     |       |       |       |       |        |       |    |     |      |       |       |
|--------|----------------------------------------------------------------------------------------------------------------------------------------------------------------------------------------------------------------------------|-------|---|----|----|-----|-------|-------|-------|-------|--------|-------|----|-----|------|-------|-------|
| Q9ULL4 | Protein kinase<br>C-binding<br>protein 1<br>OS=Homo<br>sapiens<br>GN=ZMYND8<br>PE=1 SV=2 -<br>[PKCB1_HUMAN<br>CDGSH iron-<br>sulfur domain-<br>containing<br>protein 3,<br>mitochondrial                                   | 2.36  | 1 | 2  | 2  | 4   | 1.515 | 0.826 | 0.665 | 0.810 | 12.18  | 2.36  | 2  | 4   | 1186 | 131.6 | 7.20  |
| P0C7P0 | OS=Homo<br>sapiens<br>GN=CISD3<br>PE=1 SV=1 -<br>[CISD3_HUMAN<br>]                                                                                                                                                         | 4.72  | 1 | 1  | 1  | 1   | 0.676 | 0.814 | 0.668 | 0.810 | 1.99   | 4.72  | 1  | 1   | 127  | 14.2  | 10.55 |
| O14980 | Exportin-1<br>OS=Homo<br>sapiens<br>GN=XPO1<br>PE=1 SV=1 -<br>[XPO1_HUMAN]                                                                                                                                                 | 19.79 | 1 | 18 | 18 | 91  | 0.837 | 0.955 | 0.714 | 0.810 | 229.14 | 19.79 | 31 | 91  | 1071 | 123.3 | 6.06  |
| Q9Y6A4 | Cilia- and<br>flagella-<br>associated<br>protein 20<br>OS=Homo<br>sapiens<br>GN=CFAP20<br>PE=1 SV=1 -<br>[CFA20_HUMAN<br>Retinol<br>dehydrogenase<br>14 OS=Homo<br>sapiens<br>GN=RDH14<br>PE=1 SV=1 -<br>[RDH14_HUMAN<br>] | 8.29  | 1 | 2  | 2  | 2   | 0.906 | 0.766 | 0.616 | 0.810 | 2.39   | 8.29  | 2  | 2   | 193  | 22.8  | 9.76  |
| Q9HBH5 | Cdc42 effector<br>protein 2<br>OS=Homo<br>sapiens<br>GN=CDC42EP2<br>PE=1 SV=1 -<br>[BORG1_HUMA<br>N]                                                                                                                       | 30.95 | 1 | 8  | 8  | 30  | 0.868 | 1.274 | 1.088 | 0.810 | 82.66  | 30.95 | 13 | 30  | 336  | 36.8  | 8.79  |
| O14613 | Lipopolysacchari<br>de-responsive<br>and beige-like<br>anchor protein<br>OS=Homo<br>sapiens<br>GN=LRBA PE=1<br>SV=4 -<br>[LRBA_HUMAN]                                                                                      | 32.86 | 1 | 4  | 4  | 7   | 1.003 | 0.718 | 1.196 | 0.810 | 20.68  | 32.86 | 6  | 7   | 210  | 22.5  | 5.12  |
| P50851 | Ezrin<br>OS=Homo<br>sapiens<br>GN=EZR PE=1<br>SV=4 -<br>[EZRI_HUMAN]                                                                                                                                                       | 5.87  | 1 | 15 | 16 | 35  | 0.892 | 0.912 | 1.045 | 0.810 | 72.40  | 5.87  | 25 | 35  | 2863 | 318.9 | 5.60  |
| P15311 | Translocation<br>protein SEC63<br>homolog<br>OS=Homo<br>sapiens<br>GN=SEC63<br>PE=1 SV=2 -<br>[SEC63_HUMAN<br>]                                                                                                            | 43.69 | 1 | 18 | 33 | 301 | 1.019 | 1.999 | 1.372 | 0.810 | 746.54 | 43.69 | 51 | 301 | 586  | 69.4  | 6.27  |
| Q9UGP8 |                                                                                                                                                                                                                            | 30.39 | 1 | 20 | 20 | 67  | 0.839 | 0.900 | 0.811 | 0.811 | 176.69 | 30.39 | 28 | 67  | 760  | 87.9  | 5.31  |

|        |                                                                                                           |       |   |    |    |     |       |       |       |       |        |       |    |     |      |       |       |
|--------|-----------------------------------------------------------------------------------------------------------|-------|---|----|----|-----|-------|-------|-------|-------|--------|-------|----|-----|------|-------|-------|
| P61254 | 60S ribosomal protein L26<br>OS=Homo sapiens<br>GN=RPL26<br>PE=1 SV=1 - [RL26_HUMAN]                      | 49.66 | 2 | 2  | 13 | 105 | 0.733 | 0.843 | 0.662 | 0.811 | 191.85 | 49.66 | 22 | 105 | 145  | 17.2  | 10.55 |
| P61163 | Alpha-centractin<br>OS=Homo sapiens<br>GN=ACTR1A<br>PE=1 SV=1 - [ACTZ_HUMAN]                              | 39.63 | 2 | 6  | 12 | 199 | 1.106 | 1.044 | 1.365 | 0.811 | 461.09 | 39.63 | 21 | 199 | 376  | 42.6  | 6.64  |
| Q9NZL4 | Hsp70-binding protein 1<br>OS=Homo sapiens<br>GN=HSPBP1<br>PE=1 SV=1 - [HPBP1_HUMAN]                      | 12.98 | 1 | 5  | 5  | 13  | 0.713 | 0.575 | 0.785 | 0.811 | 31.54  | 12.98 | 7  | 13  | 362  | 39.4  | 5.21  |
| Q13332 | Receptor-type tyrosine-protein phosphatase S<br>OS=Homo sapiens<br>GN=PTPRS<br>PE=1 SV=3 - [PTPRS_HUMAN]  | 4.21  | 2 | 4  | 5  | 6   | 0.796 | 0.869 | 0.652 | 0.811 | 16.78  | 4.21  | 6  | 6   | 1948 | 216.9 | 6.46  |
| P40855 | Peroxisomal biogenesis factor 19<br>OS=Homo sapiens<br>GN=PEX19<br>PE=1 SV=1 - [PEX19_HUMAN]              | 41.47 | 1 | 10 | 10 | 67  | 0.853 | 0.904 | 0.944 | 0.811 | 190.38 | 41.47 | 17 | 67  | 299  | 32.8  | 4.34  |
| O14933 | Ubiquitin/ISG15-conjugating enzyme E2 L6<br>OS=Homo sapiens<br>GN=UBE2L6<br>PE=1 SV=4 - [UB2L6_HUMAN]     | 41.83 | 1 | 5  | 6  | 31  | 1.839 | 1.032 | 1.102 | 0.811 | 76.24  | 41.83 | 10 | 31  | 153  | 17.8  | 7.88  |
| P04216 | Thy-1 membrane glycoprotein<br>OS=Homo sapiens<br>GN=THY1<br>PE=1 SV=2 - [THY1_HUMAN]                     | 9.32  | 1 | 1  | 1  | 5   | 0.468 | 0.559 | 0.587 | 0.811 | 15.53  | 9.32  | 2  | 5   | 161  | 17.9  | 8.73  |
| Q96DR7 | Rho guanine nucleotide exchange factor 26<br>OS=Homo sapiens<br>GN=ARHGEF26<br>PE=1 SV=4 - [ARHGQ_HUMA]   | 1.26  | 1 | 1  | 1  | 1   | 0.730 | 0.744 | 0.500 | 0.811 | 2.55   | 1.26  | 1  | 1   | 871  | 97.3  | 8.95  |
| Q96DP5 | Methionyl-tRNA formyltransferase, mitochondrial<br>OS=Homo sapiens<br>GN=MTFMT<br>PE=1 SV=2 - [FMT_HUMAN] | 7.71  | 1 | 3  | 3  | 4   | 1.124 | 1.226 | 0.926 | 0.811 | 6.47   | 7.71  | 4  | 4   | 389  | 43.8  | 9.66  |



|        |                                                                                                                         |       |   |    |    |     |       |       |       |       |        |       |    |     |      |       |      |
|--------|-------------------------------------------------------------------------------------------------------------------------|-------|---|----|----|-----|-------|-------|-------|-------|--------|-------|----|-----|------|-------|------|
| Q9Y3Q8 | TSC22 domain<br>family protein<br>4 OS=Homo<br>sapiens<br>GN=TSC22D4<br>PE=1 SV=2 -<br>[T22D4_HUMAN<br>]                | 30.63 | 1 | 8  | 10 | 35  | 0.845 | 0.916 | 1.385 | 0.811 | 78.80  | 30.63 | 16 | 35  | 395  | 41.0  | 7.21 |
| O15400 | Syntaxin-7<br>OS=Homo<br>sapiens<br>GN=STX7<br>PE=1 SV=4 -<br>[STX7_HUMAN]                                              | 30.27 | 1 | 7  | 7  | 40  | 0.887 | 1.204 | 1.159 | 0.811 | 107.91 | 30.27 | 13 | 40  | 261  | 29.8  | 5.55 |
| O15013 | Rho guanine<br>nucleotide<br>exchange<br>factor 10<br>OS=Homo<br>sapiens<br>GN=ARHGEF10<br>PE=1 SV=4 -<br>[ARHGA_HUMAN] | 3.58  | 1 | 6  | 6  | 13  | 0.917 | 1.337 | 1.009 | 0.811 | 26.78  | 3.58  | 10 | 13  | 1369 | 151.5 | 5.68 |
| P50895 | Basal cell<br>adhesion<br>molecule<br>OS=Homo<br>sapiens<br>GN=BCAM<br>PE=1 SV=2 -<br>[BCAM_HUMAN]                      | 26.59 | 1 | 12 | 12 | 39  | 1.581 | 1.580 | 1.974 | 0.811 | 94.13  | 26.59 | 21 | 39  | 628  | 67.4  | 5.81 |
| Q9NYG2 | Palmitoyltransf<br>erase ZDHHC3<br>OS=Homo<br>sapiens<br>GN=ZDHHC3<br>PE=1 SV=2 -<br>[ZDHC3_HUMAN<br>]                  | 5.35  | 1 | 1  | 1  | 1   | 0.750 | 0.525 | 0.757 | 0.811 | 3.28   | 5.35  | 1  | 1   | 299  | 34.1  | 8.18 |
| Q13418 | Integrin-linked<br>protein kinase<br>OS=Homo<br>sapiens GN=ILK<br>PE=1 SV=2 -<br>[ILK_HUMAN]                            | 33.19 | 1 | 16 | 16 | 126 | 0.935 | 1.135 | 1.344 | 0.812 | 306.97 | 33.19 | 29 | 126 | 452  | 51.4  | 8.07 |
| Q5JTJ3 | Cytochrome c<br>oxidase<br>assembly factor<br>6 homolog<br>OS=Homo<br>sapiens<br>GN=COA6<br>PE=1 SV=1 -<br>[COA6_HUMAN] | 21.60 | 1 | 2  | 2  | 5   | 0.910 | 1.004 | 0.855 | 0.812 | 18.52  | 21.60 | 3  | 5   | 125  | 14.1  | 8.25 |
| Q92791 | Synaptonemal<br>complex<br>protein SC65<br>OS=Homo<br>sapiens<br>GN=LEPREL4<br>PE=1 SV=1 -<br>[SC65_HUMAN]              | 13.73 | 1 | 6  | 6  | 37  | 0.700 | 0.885 | 0.778 | 0.812 | 84.28  | 13.73 | 11 | 37  | 437  | 50.3  | 4.77 |
| E0CX11 | Uncharacterize<br>d protein<br>C7orf73<br>OS=Homo<br>sapiens<br>GN=C7orf73<br>PE=3 SV=1 -<br>[CG073_HUMAN<br>]          | 14.89 | 2 | 1  | 2  | 2   | 1.413 | 0.833 | 0.370 | 0.812 | 0.00   | 14.89 | 2  | 2   | 47   | 5.3   | 9.13 |

|        |                                                                                                                             |       |   |     |     |      |       |       |       |       |         |       |     |      |      |       |      |
|--------|-----------------------------------------------------------------------------------------------------------------------------|-------|---|-----|-----|------|-------|-------|-------|-------|---------|-------|-----|------|------|-------|------|
| P47755 | F-actin-capping<br>protein subunit<br>alpha-2<br>OS=Homo<br>sapiens<br>GN=CAPZA2<br>PE=1 SV=3 -<br>[CAZA2_HUMAN<br>]        | 59.44 | 1 | 9   | 12  | 178  | 0.894 | 1.057 | 1.126 | 0.812 | 394.49  | 59.44 | 19  | 178  | 286  | 32.9  | 5.85 |
| Q99835 | Smoothened<br>homolog<br>OS=Homo<br>sapiens<br>GN=SMO PE=1<br>SV=1 -<br>[SMO_HUMAN]                                         | 0.89  | 1 | 1   | 1   | 2    | 0.842 | 0.766 | 0.982 | 0.812 | 4.74    | 0.89  | 1   | 2    | 787  | 86.3  | 8.34 |
| Q9UMX1 | Suppressor of<br>fused homolog<br>OS=Homo<br>sapiens<br>GN=SUFU<br>PE=1 SV=2 -<br>[SUFU_HUMAN]                              | 3.51  | 1 | 1   | 1   | 2    | 1.337 | 1.054 | 0.820 | 0.812 | 3.29    | 3.51  | 2   | 2    | 484  | 53.9  | 5.33 |
| Q99426 | Tubulin-folding<br>cofactor B<br>OS=Homo<br>sapiens<br>GN=TBCB<br>PE=1 SV=2 -<br>[TBCB_HUMAN]                               | 20.08 | 1 | 5   | 5   | 36   | 0.883 | 1.245 | 1.353 | 0.813 | 75.97   | 20.08 | 8   | 36   | 244  | 27.3  | 5.15 |
| Q92673 | Sortilin-related<br>receptor<br>OS=Homo<br>sapiens<br>GN=SORL1<br>PE=1 SV=2 -<br>[SORL_HUMAN]                               | 0.99  | 1 | 1   | 1   | 1    | 0.748 | 1.391 | 1.295 | 0.813 | 0.00    | 0.99  | 1   | 1    | 2214 | 248.3 | 5.55 |
| Q01082 | Spectrin beta<br>chain, non-<br>erythrocytic 1<br>OS=Homo<br>sapiens<br>GN=SPTBN1<br>PE=1 SV=2 -<br>[SPTB2_HUMAN<br>]       | 64.55 | 2 | 130 | 149 | 1152 | 1.185 | 1.008 | 0.861 | 0.813 | 2844.78 | 64.55 | 256 | 1152 | 2364 | 274.4 | 5.57 |
| Q13740 | CD166 antigen<br>OS=Homo<br>sapiens<br>GN=ALCAM<br>PE=1 SV=2 -<br>[CD166_HUMAN<br>]                                         | 28.82 | 1 | 18  | 18  | 76   | 0.857 | 0.899 | 0.877 | 0.814 | 173.90  | 28.82 | 28  | 76   | 583  | 65.1  | 6.25 |
| Q96CW1 | AP-2 complex<br>subunit mu<br>OS=Homo<br>sapiens<br>GN=AP2M1<br>PE=1 SV=2 -<br>[AP2M1_HUMA<br>N]                            | 48.74 | 1 | 22  | 22  | 104  | 0.953 | 0.733 | 0.816 | 0.814 | 273.62  | 48.74 | 37  | 104  | 435  | 49.6  | 9.54 |
| Q8NEC5 | Cation channel<br>perm-<br>associated<br>protein 1<br>OS=Homo<br>sapiens<br>GN=CATSPER1<br>PE=1 SV=3 -<br>[CTSR1_HUMAN<br>] | 1.54  | 1 | 1   | 1   | 1    | 1.002 | 1.077 | 1.494 | 0.814 | 0.00    | 1.54  | 1   | 1    | 780  | 90.0  | 7.71 |

|        |                                                                                                                         |       |   |    |    |     |       |       |       |       |        |       |    |     |      |       |       |
|--------|-------------------------------------------------------------------------------------------------------------------------|-------|---|----|----|-----|-------|-------|-------|-------|--------|-------|----|-----|------|-------|-------|
| Q96CV9 | Optineurin<br>OS=Homo sapiens<br>GN=OPTN<br>PE=1 SV=2 - [OPTN_HUMAN]                                                    | 48.87 | 1 | 27 | 29 | 130 | 0.747 | 0.957 | 1.107 | 0.814 | 306.68 | 48.87 | 48 | 130 | 577  | 65.9  | 5.24  |
| Q9HC62 | Sentrin-specific protease 2<br>OS=Homo sapiens<br>GN=SENP2<br>PE=1 SV=3 - [SENP2_HUMAN]                                 | 1.70  | 1 | 1  | 1  | 1   | 0.820 | 1.528 | 1.495 | 0.814 | 0.00   | 1.70  | 1  | 1   | 589  | 67.8  | 9.48  |
| Q68CQ1 | Maestro heat-like repeat-containing protein family member 7<br>OS=Homo sapiens<br>GN=MROH7<br>PE=2 SV=4 - [MROH7_HUMAN] | 1.13  | 1 | 1  | 1  | 4   | 1.142 | 0.792 | 0.645 | 0.814 | 0.00   | 1.13  | 1  | 4   | 1323 | 145.6 | 6.96  |
| P40424 | Pre-B-cell leukemia transcription factor 1<br>OS=Homo sapiens<br>GN=PBX1<br>PE=1 SV=1 - [PBX1_HUMAN]                    | 17.44 | 2 | 4  | 5  | 12  | 0.875 | 2.566 | 0.892 | 0.814 | 33.78  | 17.44 | 6  | 12  | 430  | 46.6  | 7.03  |
| Q16881 | Thioredoxin reductase 1, cytoplasmic<br>OS=Homo sapiens<br>GN=TXNRD1<br>PE=1 SV=3 - [TRXR1_HUMAN]                       | 43.30 | 1 | 26 | 26 | 241 | 1.006 | 0.592 | 1.151 | 0.814 | 553.00 | 43.30 | 43 | 241 | 649  | 70.9  | 7.39  |
| P35711 | Transcription factor SOX-5<br>OS=Homo sapiens<br>GN=SOX5<br>PE=1 SV=3 - [SOX5_HUMAN]                                    | 2.49  | 2 | 1  | 2  | 2   | 0.929 | 0.510 | 0.696 | 0.814 | 5.03   | 2.49  | 2  | 2   | 763  | 84.0  | 6.60  |
| O95747 | Serine/threonine-protein kinase OSR1<br>OS=Homo sapiens<br>GN=OXSR1<br>PE=1 SV=1 - [OXSR1_HUMAN]                        | 37.00 | 1 | 13 | 16 | 58  | 1.196 | 0.899 | 1.009 | 0.814 | 148.25 | 37.00 | 26 | 58  | 527  | 58.0  | 6.43  |
| Q9NS69 | Mitochondrial import receptor subunit TOM22 homolog<br>OS=Homo sapiens<br>GN=TOMM22<br>PE=1 SV=3 - [TOM22_HUMAN]        | 8.45  | 1 | 1  | 1  | 9   | 0.881 | 0.608 | 0.618 | 0.814 | 12.36  | 8.45  | 2  | 9   | 142  | 15.5  | 4.34  |
| P61927 | 60S ribosomal protein L37<br>OS=Homo sapiens<br>GN=RPL37<br>PE=1 SV=2 - [RL37_HUMAN]                                    | 26.80 | 1 | 5  | 5  | 13  | 0.607 | 0.768 | 0.634 | 0.814 | 21.66  | 26.80 | 6  | 13  | 97   | 11.1  | 11.74 |

|        |                                                                                                                                                                    |       |   |    |    |     |       |       |       |       |        |       |    |     |      |       |      |
|--------|--------------------------------------------------------------------------------------------------------------------------------------------------------------------|-------|---|----|----|-----|-------|-------|-------|-------|--------|-------|----|-----|------|-------|------|
| O43169 | Cytochrome b5<br>type B<br>OS=Homo<br>sapiens<br>GN=CYB5B<br>PE=1 SV=2 -<br>[CYB5B_HUMAN<br>]<br>Isopentenyl-<br>diphosphate<br>Delta-<br>isomerase 1              | 35.62 | 1 | 3  | 3  | 9   | 0.900 | 0.780 | 0.759 | 0.814 | 28.57  | 35.62 | 4  | 9   | 146  | 16.3  | 4.97 |
| Q13907 | OS=Homo<br>sapiens<br>GN=IDI1 PE=1<br>SV=2 -<br>[IDI1_HUMAN]                                                                                                       | 24.23 | 2 | 4  | 5  | 14  | 1.281 | 0.784 | 1.246 | 0.815 | 40.13  | 24.23 | 6  | 14  | 227  | 26.3  | 6.34 |
| P11233 | Ras-related<br>protein Ral-A<br>OS=Homo<br>sapiens<br>GN=RALA PE=1<br>SV=1 -<br>[RALA_HUMAN]                                                                       | 50.00 | 1 | 4  | 7  | 36  | 1.174 | 0.846 | 0.825 | 0.815 | 89.74  | 50.00 | 12 | 36  | 206  | 23.6  | 7.11 |
| Q99538 | Legumain<br>OS=Homo<br>sapiens<br>GN=LGMN<br>PE=1 SV=1 -<br>[LGMN_HUMAN]                                                                                           | 12.93 | 1 | 5  | 5  | 61  | 0.464 | 0.359 | 0.700 | 0.815 | 158.37 | 12.93 | 8  | 61  | 433  | 49.4  | 6.55 |
| Q8N1F8 | Serine/threoni<br>ne-protein<br>kinase 11-<br>interacting<br>protein<br>OS=Homo<br>sapiens<br>GN=STK111P<br>PE=1 SV=3 -<br>[S111P_HUMAN]                           | 1.46  | 1 | 1  | 2  | 6   | 0.687 | 0.807 | 0.766 | 0.815 | 11.21  | 1.46  | 3  | 6   | 1099 | 121.3 | 5.39 |
| Q13508 | Ecto-ADP-<br>ribosyltransfera<br>se 3 OS=Homo<br>sapiens<br>GN=ART3<br>PE=1 SV=2 -<br>[NAR3_HUMAN]                                                                 | 4.37  | 3 | 1  | 2  | 3   | 1.807 | 1.012 | 1.418 | 0.815 | 4.64   | 4.37  | 2  | 3   | 389  | 43.9  | 6.06 |
| O15084 | Serine/threoni<br>ne-protein<br>phosphatase 6<br>regulatory<br>ankyrin repeat<br>subunit A<br>OS=Homo<br>sapiens<br>GN=ANKRD28<br>PE=1 SV=5 -<br>[ANR28_HUMAN<br>] | 3.23  | 1 | 2  | 2  | 4   | 0.904 | 1.416 | 0.739 | 0.815 | 14.76  | 3.23  | 3  | 4   | 1053 | 112.9 | 6.25 |
| Q96B36 | Proline-rich<br>AKT1 substrate<br>1 OS=Homo<br>sapiens<br>GN=AKT1S1<br>PE=1 SV=1 -<br>[AKTS1_HUMAN<br>]                                                            | 12.89 | 1 | 3  | 3  | 18  | 0.836 | 0.907 | 0.993 | 0.815 | 38.90  | 12.89 | 6  | 18  | 256  | 27.4  | 4.75 |
| P52565 | Rho GDP-<br>dissociation<br>inhibitor 1<br>OS=Homo<br>sapiens<br>GN=ARHGDI1A<br>PE=1 SV=3 -<br>[GDIR1_HUMAN<br>]                                                   | 47.55 | 1 | 11 | 11 | 183 | 1.239 | 1.120 | 1.180 | 0.815 | 540.96 | 47.55 | 18 | 183 | 204  | 23.2  | 5.11 |

|        |                                                                                                                                                                                                                                                           |       |   |    |    |     |       |       |       |       |        |       |    |     |      |       |      |
|--------|-----------------------------------------------------------------------------------------------------------------------------------------------------------------------------------------------------------------------------------------------------------|-------|---|----|----|-----|-------|-------|-------|-------|--------|-------|----|-----|------|-------|------|
| Q93100 | Phosphorylase<br>b kinase<br>regulatory<br>subunit beta<br>OS=Homo<br>sapiens<br>GN=PHKB<br>PE=1 SV=3 -<br>[KPBB_HUMAN]                                                                                                                                   | 7.69  | 3 | 8  | 9  | 15  | 0.773 | 1.184 | 1.289 | 0.815 | 27.65  | 7.69  | 13 | 15  | 1093 | 124.8 | 6.95 |
| Q8TEL6 | Short transient<br>receptor<br>potential<br>channel 4-<br>associated<br>protein<br>OS=Homo<br>sapiens<br>GN=TRPC4AP<br>PE=1 SV=2 -<br>[TP4AP_HUMAN]<br>Calpain-1<br>catalytic<br>subunit<br>OS=Homo<br>sapiens<br>GN=CAPN1<br>PE=1 SV=1 -<br>[CAN1_HUMAN] | 1.25  | 1 | 1  | 1  | 1   | 0.771 | 1.554 | 2.352 | 0.815 | 2.89   | 1.25  | 1  | 1   | 797  | 90.8  | 7.61 |
| P07384 | Nuclear<br>transport<br>factor 2<br>OS=Homo<br>sapiens<br>GN=CAPN1<br>PE=1 SV=1 -<br>[CAN1_HUMAN]                                                                                                                                                         | 37.25 | 1 | 24 | 24 | 93  | 1.049 | 0.910 | 1.145 | 0.815 | 232.13 | 37.25 | 37 | 93  | 714  | 81.8  | 5.67 |
| P61970 | OS=Homo<br>sapiens<br>GN=NUTF2<br>PE=1 SV=1 -<br>[NUTF2_HUMAN]                                                                                                                                                                                            | 61.42 | 1 | 5  | 6  | 41  | 1.044 | 1.180 | 1.016 | 0.816 | 83.66  | 61.42 | 8  | 41  | 127  | 14.5  | 5.38 |
| Q9NXH9 | tRNA<br>(guanine(26)-<br>N(2))-<br>dimethyltransfe<br>rase OS=Homo<br>sapiens<br>GN=TRMT1<br>PE=1 SV=1 -<br>[TRM1_HUMAN]                                                                                                                                  | 6.83  | 2 | 3  | 4  | 10  | 0.591 | 0.845 | 0.704 | 0.816 | 26.86  | 6.83  | 5  | 10  | 659  | 72.2  | 7.64 |
| O60271 | C-Jun-amino-<br>terminal kinase-<br>interacting<br>protein 4<br>OS=Homo<br>sapiens<br>GN=SPAG9<br>PE=1 SV=4 -<br>[JIP4_HUMAN]                                                                                                                             | 30.89 | 2 | 32 | 34 | 115 | 0.863 | 1.038 | 0.931 | 0.816 | 325.10 | 30.89 | 55 | 115 | 1321 | 146.1 | 5.15 |
| Q9Y5J6 | Mitochondrial<br>import inner<br>membrane<br>translocase<br>subunit Tim10<br>B OS=Homo<br>sapiens<br>GN=TIMM10B<br>PE=1 SV=1 -<br>[T10B_HUMAN]                                                                                                            | 7.77  | 1 | 1  | 1  | 1   | 0.768 | 0.503 | 0.630 | 0.816 | 2.06   | 7.77  | 1  | 1   | 103  | 11.6  | 7.43 |
| Q9NUL3 | Double-<br>stranded RNA-<br>binding protein<br>Staufen<br>homolog 2<br>OS=Homo<br>sapiens<br>GN=STAU2<br>PE=1 SV=1 -<br>[STAU2_HUMAN]<br>]                                                                                                                | 16.67 | 1 | 7  | 8  | 26  | 1.166 | 1.233 | 1.192 | 0.816 | 52.32  | 16.67 | 14 | 26  | 570  | 62.6  | 9.61 |

|        |                                                                                                                                                                               |       |   |    |    |      |       |       |       |       |         |       |    |      |      |       |      |
|--------|-------------------------------------------------------------------------------------------------------------------------------------------------------------------------------|-------|---|----|----|------|-------|-------|-------|-------|---------|-------|----|------|------|-------|------|
| P42785 | <p>Lyosomal Pro-<br/>X<br/>carboxypeptida<br/>se OS=Homo<br/>sapiens<br/>GN=PRCP<br/>PE=1 SV=1 -<br/>[PCP_HUMAN]</p>                                                          | 17.54 | 1 | 7  | 7  | 23   | 0.881 | 1.197 | 1.099 | 0.817 | 49.14   | 17.54 | 12 | 23   | 496  | 55.8  | 7.21 |
| Q9Y5R8 | <p>Trafficking<br/>protein partide<br/>complex<br/>subunit 1<br/>OS=Homo<br/>sapiens<br/>GN=TRAPPC1<br/>PE=1 SV=1 -<br/>[TPPC1_HUMAN<br/>]</p>                                | 14.48 | 1 | 2  | 2  | 4    | 1.164 | 1.210 | 1.158 | 0.817 | 4.83    | 14.48 | 3  | 4    | 145  | 16.8  | 9.16 |
| P07437 | <p>Tubulin beta<br/>chain<br/>OS=Homo<br/>sapiens<br/>GN=TUBB<br/>PE=1 SV=2 -<br/>[TBB5_HUMAN]</p>                                                                            | 69.59 | 1 | 4  | 22 | 1365 | 1.125 | 1.145 | 1.152 | 0.817 | 3114.02 | 69.59 | 40 | 1365 | 444  | 49.6  | 4.89 |
| Q96BY6 | <p>Dedicator of<br/>cytokinesis<br/>protein 10<br/>OS=Homo<br/>sapiens<br/>GN=DOCK10<br/>PE=1 SV=3 -<br/>[DOC10_HUMA<br/>N]</p>                                               | 1.83  | 1 | 3  | 3  | 3    | 0.838 | 1.146 | 0.837 | 0.817 | 2.21    | 1.83  | 3  | 3    | 2186 | 249.4 | 7.14 |
| P07339 | <p>Cathepsin D<br/>OS=Homo<br/>sapiens<br/>GN=CTSD<br/>PE=1 SV=1 -<br/>[CATD_HUMAN]</p>                                                                                       | 43.93 | 1 | 16 | 16 | 102  | 0.935 | 1.071 | 0.990 | 0.817 | 230.60  | 43.93 | 25 | 102  | 412  | 44.5  | 6.54 |
| P62987 | <p>Ubiquitin-60S<br/>ribosomal<br/>protein L40<br/>OS=Homo<br/>sapiens<br/>GN=UBA52<br/>PE=1 SV=2 -<br/>[RL40_HUMAN]</p>                                                      | 64.84 | 3 | 2  | 15 | 454  | 1.139 | 1.517 | 1.063 | 0.817 | 1059.83 | 64.84 | 25 | 454  | 128  | 14.7  | 9.83 |
| Q15628 | <p>Tumor necrosis<br/>factor receptor<br/>type 1-<br/>associated<br/>DEATH domain<br/>protein<br/>OS=Homo<br/>sapiens<br/>GN=TRADD<br/>PE=1 SV=2 -<br/>[TRADD_HUMAN<br/>]</p> | 26.28 | 1 | 7  | 7  | 14   | 1.072 | 1.041 | 1.157 | 0.817 | 42.43   | 26.28 | 10 | 14   | 312  | 34.2  | 6.27 |
| Q9Y2H0 | <p>Disks large-<br/>associated<br/>protein 4<br/>OS=Homo<br/>sapiens<br/>GN=DLGAP4<br/>PE=1 SV=3 -<br/>[DLGP4_HUMAN<br/>]</p>                                                 | 7.86  | 1 | 8  | 8  | 17   | 0.939 | 0.852 | 0.867 | 0.817 | 35.45   | 7.86  | 12 | 17   | 992  | 107.9 | 7.08 |

|        |                                                                                                                         |       |   |   |   |    |       |       |       |       |       |       |    |    |      |       |      |
|--------|-------------------------------------------------------------------------------------------------------------------------|-------|---|---|---|----|-------|-------|-------|-------|-------|-------|----|----|------|-------|------|
| P15291 | Beta-1,4-galactosyltransferase 1<br>OS=Homo sapiens<br>GN=B4GALT1<br>PE=1 SV=5 - [B4GT1_HUMAN]                          | 5.03  | 1 | 2 | 2 | 4  | 0.989 | 0.670 | 0.860 | 0.817 | 11.18 | 5.03  | 3  | 4  | 398  | 43.9  | 8.65 |
| O43813 | LanC-like protein 1<br>OS=Homo sapiens<br>GN=LANCL1<br>PE=1 SV=1 - [LANCL1_HUMAN]                                       | 7.77  | 1 | 3 | 3 | 16 | 0.902 | 1.094 | 1.167 | 0.817 | 34.11 | 7.77  | 6  | 16 | 399  | 45.3  | 7.75 |
| Q68CQ7 | Glycosyltransferase 8 domain-containing protein 1<br>OS=Homo sapiens<br>GN=GLT8D1<br>PE=1 SV=2 - [GL8D1_HUMAN]          | 14.56 | 1 | 5 | 5 | 8  | 0.649 | 1.234 | 0.924 | 0.817 | 23.70 | 14.56 | 6  | 8  | 371  | 41.9  | 9.35 |
| Q5TEJ8 | Protein THEMIS2<br>OS=Homo sapiens<br>GN=THEMIS2<br>PE=2 SV=1 - [THMS2_HUMAN]                                           | 1.87  | 1 | 1 | 1 | 1  | 0.602 | 0.739 | 0.597 | 0.817 | 2.84  | 1.87  | 1  | 1  | 643  | 72.0  | 6.10 |
| Q5HYK9 | Zinc finger protein 667<br>OS=Homo sapiens<br>GN=ZNF667<br>PE=2 SV=2 - [ZNF67_HUMAN]                                    | 2.62  | 2 | 2 | 2 | 2  | 0.666 | 0.806 | 0.871 | 0.817 | 0.00  | 2.62  | 2  | 2  | 610  | 70.1  | 9.73 |
| Q5TGP6 | Maestro heat-like repeat-containing protein family member 9<br>OS=Homo sapiens<br>GN=MROH9<br>PE=2 SV=1 - [MROH9_HUMAN] | 2.97  | 1 | 1 | 1 | 1  | 1.425 | 0.651 | 0.846 | 0.817 | 2.30  | 2.97  | 1  | 1  | 573  | 65.0  | 6.34 |
| Q9Y6J0 | Calcineurin-binding protein cabin-1<br>OS=Homo sapiens<br>GN=CABIN1<br>PE=1 SV=1 - [CABIN_HUMAN]                        | 0.95  | 1 | 1 | 1 | 4  | 0.594 | 1.864 | 0.970 | 0.817 | 12.29 | 0.95  | 1  | 4  | 2220 | 246.2 | 6.02 |
| O00487 | 26S proteasome non-ATPase regulatory subunit 14<br>OS=Homo sapiens<br>GN=PSMD14<br>PE=1 SV=1 - [PSDE_HUMAN]             | 25.16 | 1 | 8 | 8 | 24 | 0.911 | 0.908 | 0.826 | 0.817 | 52.03 | 25.16 | 13 | 24 | 310  | 34.6  | 6.52 |

|        |                                                                                                                              |       |   |    |    |      |       |       |       |       |         |       |    |      |      |       |      |
|--------|------------------------------------------------------------------------------------------------------------------------------|-------|---|----|----|------|-------|-------|-------|-------|---------|-------|----|------|------|-------|------|
| Q9P1Z0 | Zinc finger and BTB domain-containing protein 4<br>OS=Homo sapiens<br>GN=ZBTB4<br>PE=1 SV=3 - [ZBTB4_HUMAN]                  | 1.68  | 1 | 1  | 1  | 1    | 0.538 | 2.221 | 1.554 | 0.817 | 3.25    | 1.68  | 1  | 1    | 1013 | 105.0 | 8.37 |
| Q15056 | Eukaryotic translation initiation factor 4H<br>OS=Homo sapiens<br>GN=EIF4H<br>PE=1 SV=5 - [IF4H_HUMAN]                       | 48.39 | 1 | 13 | 13 | 119  | 0.824 | 1.187 | 0.981 | 0.818 | 292.81  | 48.39 | 18 | 119  | 248  | 27.4  | 7.23 |
| P30044 | Peroxisredoxin-5, mitochondrial<br>OS=Homo sapiens<br>GN=PRDX5<br>PE=1 SV=4 - [PRDX5_HUMAN]                                  | 37.38 | 1 | 9  | 9  | 230  | 0.977 | 0.836 | 0.907 | 0.818 | 579.70  | 37.38 | 17 | 230  | 214  | 22.1  | 8.70 |
| Q9Y5S1 | Transient receptor potential cation channel subfamily V member 2<br>OS=Homo sapiens<br>GN=TRPV2<br>PE=1 SV=1 - [TRPV2_HUMAN] | 14.53 | 1 | 11 | 11 | 40   | 1.901 | 0.902 | 1.016 | 0.818 | 102.83  | 14.53 | 18 | 40   | 764  | 85.9  | 5.83 |
| Q9UEY8 | Gamma-adducin<br>OS=Homo sapiens<br>GN=ADD3<br>PE=1 SV=1 - [ADDG_HUMAN]                                                      | 16.57 | 1 | 11 | 11 | 68   | 0.952 | 1.080 | 1.007 | 0.818 | 140.93  | 16.57 | 18 | 68   | 706  | 79.1  | 6.32 |
| P56192 | Methionine--tRNA ligase, cytoplasmic<br>OS=Homo sapiens<br>GN=MARS<br>PE=1 SV=2 - [SYMC_HUMAN]                               | 27.22 | 1 | 21 | 21 | 85   | 0.813 | 0.831 | 0.810 | 0.818 | 205.38  | 27.22 | 38 | 85   | 900  | 101.1 | 6.16 |
| P35240 | Merlin<br>OS=Homo sapiens<br>GN=NF2 PE=1 SV=1 - [MERL_HUMAN]                                                                 | 12.77 | 1 | 7  | 7  | 16   | 0.932 | 1.133 | 0.862 | 0.818 | 33.41   | 12.77 | 11 | 16   | 595  | 69.6  | 6.47 |
| P12268 | Inosine-5'-monophosphate dehydrogenase 2<br>OS=Homo sapiens<br>GN=IMPDH2<br>PE=1 SV=2 - [IMDH2_HUMAN]                        | 44.94 | 1 | 18 | 22 | 160  | 0.785 | 0.922 | 0.761 | 0.818 | 396.80  | 44.94 | 36 | 160  | 514  | 55.8  | 6.90 |
| P06733 | Alpha-enolase<br>OS=Homo sapiens<br>GN=ENO1<br>PE=1 SV=2 - [ENOA_HUMAN]                                                      | 83.18 | 1 | 40 | 45 | 1638 | 1.101 | 1.099 | 0.890 | 0.819 | 4393.01 | 83.18 | 69 | 1638 | 434  | 47.1  | 7.39 |



|        |                                                                                                                    |       |   |    |    |     |       |       |       |       |         |       |    |     |      |       |      |
|--------|--------------------------------------------------------------------------------------------------------------------|-------|---|----|----|-----|-------|-------|-------|-------|---------|-------|----|-----|------|-------|------|
| Q94875 | Sorbin and SH3 domain-containing protein 2<br>OS=Homo sapiens<br>GN=SORBS2<br>PE=1 SV=3 - [SRBS2_HUMAN]            | 13.64 | 1 | 11 | 12 | 33  | 8.338 | 0.798 | 1.294 | 0.819 | 69.78   | 13.64 | 20 | 33  | 1100 | 124.0 | 8.31 |
| Q13509 | Tubulin beta-3 chain<br>OS=Homo sapiens<br>GN=TUBB3<br>PE=1 SV=2 - [TBB3_HUMAN]                                    | 47.11 | 2 | 4  | 18 | 912 | 1.184 | 1.653 | 1.403 | 0.819 | 2002.06 | 47.11 | 34 | 912 | 450  | 50.4  | 4.93 |
| Q9UKY7 | Protein CDV3 homolog<br>OS=Homo sapiens<br>GN=CDV3<br>PE=1 SV=1 - [CDV3_HUMAN]                                     | 45.74 | 1 | 12 | 12 | 74  | 0.786 | 1.091 | 0.985 | 0.819 | 197.86  | 45.74 | 17 | 74  | 258  | 27.3  | 6.40 |
| Q9H269 | Vacuolar protein sorting-associated protein 16 homolog<br>OS=Homo sapiens<br>GN=VPS16<br>PE=1 SV=2 - [VPS16_HUMAN] | 16.21 | 1 | 11 | 11 | 20  | 1.121 | 0.939 | 0.958 | 0.819 | 43.89   | 16.21 | 16 | 20  | 839  | 94.6  | 6.77 |
| Q9H993 | UPF0364 protein C6orf211<br>OS=Homo sapiens<br>GN=C6orf211<br>PE=1 SV=1 - [CF211_HUMAN]                            | 13.38 | 1 | 8  | 8  | 17  | 0.854 | 0.835 | 0.739 | 0.819 | 32.37   | 13.38 | 12 | 17  | 441  | 51.1  | 5.76 |
| Q9P265 | Disco-interacting protein 2 homolog B<br>OS=Homo sapiens<br>GN=DIP2B<br>PE=1 SV=3 - [DIP2B_HUMAN]                  | 7.11  | 1 | 8  | 8  | 30  | 0.958 | 0.709 | 0.827 | 0.819 | 53.68   | 7.11  | 12 | 30  | 1576 | 171.4 | 8.09 |
| P41587 | Vasoactive intestinal polypeptide receptor 2<br>OS=Homo sapiens<br>GN=VIPR2<br>PE=1 SV=2 - [VIPR2_HUMAN]           | 2.51  | 1 | 1  | 1  | 1   | 2.703 | 0.760 | 0.829 | 0.819 | 4.05    | 2.51  | 1  | 1   | 438  | 49.4  | 7.94 |
| P08172 | Muscarinic acetylcholine receptor M2<br>OS=Homo sapiens<br>GN=CHRM2<br>PE=1 SV=1 - [ACM2_HUMAN]                    | 3.86  | 1 | 2  | 2  | 4   | 1.136 | 0.442 | 0.389 | 0.819 | 13.44   | 3.86  | 3  | 4   | 466  | 51.7  | 8.85 |

|        |                                                                                                           |       |   |    |    |     |       |       |       |       |        |       |    |     |      |       |      |
|--------|-----------------------------------------------------------------------------------------------------------|-------|---|----|----|-----|-------|-------|-------|-------|--------|-------|----|-----|------|-------|------|
| P56962 | Syntaxin-17<br>OS=Homo sapiens<br>GN=STX17<br>PE=1 SV=2 - [STX17_HUMAN]                                   | 8.28  | 1 | 3  | 3  | 5   | 1.315 | 1.063 | 0.751 | 0.819 | 8.95   | 8.28  | 4  | 5   | 302  | 33.4  | 6.57 |
| P14868 | Aspartate--tRNA ligase, cytoplasmic<br>OS=Homo sapiens<br>GN=DARS<br>PE=1 SV=2 - [SYDC_HUMAN]             | 57.09 | 1 | 27 | 27 | 147 | 0.871 | 0.871 | 0.839 | 0.820 | 357.62 | 57.09 | 42 | 147 | 501  | 57.1  | 6.55 |
| P41212 | Transcription factor ETV6<br>OS=Homo sapiens<br>GN=ETV6<br>PE=1 SV=1 - [ETV6_HUMAN]                       | 3.76  | 1 | 2  | 2  | 3   |       |       | 1.331 | 0.820 | 3.92   | 3.76  | 3  | 3   | 452  | 53.0  | 7.43 |
| Q14643 | Inositol 1,4,5-trisphosphate receptor type 1<br>OS=Homo sapiens<br>GN=ITPR1<br>PE=1 SV=3 - [ITPR1_HUMAN]  | 7.58  | 1 | 13 | 21 | 62  | 0.903 | 0.731 | 0.805 | 0.820 | 132.41 | 7.58  | 32 | 62  | 2758 | 313.7 | 6.04 |
| Q6VY07 | Phosphofurin acidic cluster sorting protein 1<br>OS=Homo sapiens<br>GN=PACS1<br>PE=1 SV=2 - [PACS1_HUMAN] | 13.81 | 1 | 10 | 10 | 21  | 0.858 | 0.943 | 1.096 | 0.820 | 63.44  | 13.81 | 13 | 21  | 963  | 104.8 | 7.74 |
| P61764 | Syntaxin-binding protein 1<br>OS=Homo sapiens<br>GN=STXB1<br>PE=1 SV=1 - [STXB1_HUMAN]                    | 31.82 | 1 | 16 | 17 | 58  | 1.243 | 1.003 | 0.980 | 0.820 | 115.83 | 31.82 | 27 | 58  | 594  | 67.5  | 6.96 |
| A6NDB9 | Paralemmin-3<br>OS=Homo sapiens<br>GN=PALM3<br>PE=1 SV=2 - [PALM3_HUMAN]                                  | 4.46  | 1 | 1  | 3  | 20  | 1.051 | 1.375 | 0.669 | 0.820 | 42.59  | 4.46  | 4  | 20  | 673  | 71.7  | 4.53 |
| O15144 | Actin-related protein 2/3 complex subunit 2<br>OS=Homo sapiens<br>GN=ARPC2<br>PE=1 SV=1 - [ARPC2_HUMAN]   | 53.33 | 1 | 19 | 19 | 162 | 0.945 | 0.837 | 0.940 | 0.820 | 400.18 | 53.33 | 31 | 162 | 300  | 34.3  | 7.36 |
| Q9P232 | Contactin-3<br>OS=Homo sapiens<br>GN=CNTN3<br>PE=1 SV=3 - [CNTN3_HUMAN]                                   | 0.88  | 1 | 1  | 1  | 1   | 0.693 | 1.084 | 0.763 | 0.821 | 0.00   | 0.88  | 1  | 1   | 1028 | 112.8 | 6.30 |

|        |                                                                                                                      |       |   |    |    |     |       |       |       |       |         |       |     |     |      |       |      |
|--------|----------------------------------------------------------------------------------------------------------------------|-------|---|----|----|-----|-------|-------|-------|-------|---------|-------|-----|-----|------|-------|------|
| Q14766 | Latent-transforming growth factor beta-binding protein 1<br>OS=Homo sapiens<br>GN=LTBP1<br>PE=1 SV=4 - [LTBP1_HUMAN] | 2.96  | 1 | 3  | 3  | 5   | 0.993 | 1.554 | 1.206 | 0.821 | 12.31   | 2.96  | 4   | 5   | 1721 | 186.7 | 5.96 |
| P63167 | Dynein light chain 1, cytoplasmic<br>OS=Homo sapiens<br>GN=DYNLL1<br>PE=1 SV=1 - [DYL1_HUMAN]                        | 44.94 | 1 | 5  | 6  | 26  | 1.068 | 1.021 | 0.925 | 0.821 | 48.32   | 44.94 | 9   | 26  | 89   | 10.4  | 7.40 |
| P09211 | Glutathione S-transferase P<br>OS=Homo sapiens<br>GN=GSTP1<br>PE=1 SV=2 - [GSTP1_HUMAN]                              | 64.29 | 1 | 10 | 10 | 400 | 1.001 | 0.912 | 0.976 | 0.821 | 1028.01 | 64.29 | 17  | 400 | 210  | 23.3  | 5.64 |
| P04899 | Guanine nucleotide-binding protein G(i) subunit alpha-2<br>OS=Homo sapiens<br>GN=GNAI2<br>PE=1 SV=3 - [GNAI2_HUMAN]  | 57.18 | 4 | 10 | 19 | 125 | 0.921 | 0.859 | 0.916 | 0.821 | 327.89  | 57.18 | 32  | 125 | 355  | 40.4  | 5.54 |
| Q5VT97 | Rho GTPase-activating protein SYDE2<br>OS=Homo sapiens<br>GN=SYDE2<br>PE=1 SV=2 - [SYDE2_HUMAN]                      | 2.51  | 3 | 2  | 3  | 16  | 0.966 | 0.538 | 0.890 | 0.821 | 32.07   | 2.51  | 4   | 16  | 1194 | 133.1 | 8.57 |
| Q14789 | Golgin subfamily B member 1<br>OS=Homo sapiens<br>GN=GOLGB1<br>PE=1 SV=2 - [GOGB1_HUMAN]                             | 25.25 | 2 | 75 | 81 | 227 | 0.803 | 1.040 | 1.061 | 0.821 | 547.11  | 25.25 | 120 | 227 | 3259 | 375.8 | 5.00 |
| A0AVI2 | Fer-1-like protein 5<br>OS=Homo sapiens<br>GN=FER1L5<br>PE=2 SV=2 - [FR1L5_HUMAN]                                    | 2.96  | 1 | 3  | 5  | 5   | 0.940 | 1.025 | 1.191 | 0.821 | 9.63    | 2.96  | 5   | 5   | 2093 | 241.8 | 7.96 |
| Q03135 | Caveolin-1<br>OS=Homo sapiens<br>GN=CAV1<br>PE=1 SV=4 - [CAV1_HUMAN]                                                 | 45.51 | 2 | 9  | 9  | 300 | 2.484 | 0.950 | 1.109 | 0.821 | 731.09  | 45.51 | 16  | 300 | 178  | 20.5  | 6.02 |
| Q9NZD8 | Maspardin<br>OS=Homo sapiens<br>GN=SPG21<br>PE=1 SV=1 - [SPG21_HUMAN]                                                | 13.31 | 1 | 2  | 3  | 3   | 1.143 | 1.595 | 1.023 | 0.821 | 7.59    | 13.31 | 3   | 3   | 308  | 34.9  | 6.28 |

|        |                                                                                                                          |       |   |    |    |     |       |       |       |       |        |       |    |     |      |       |      |
|--------|--------------------------------------------------------------------------------------------------------------------------|-------|---|----|----|-----|-------|-------|-------|-------|--------|-------|----|-----|------|-------|------|
| Q9H0H0 | Integrator complex subunit 2<br>OS=Homo sapiens<br>GN=INTS2<br>PE=1 SV=2 - [INT2_HUMAN]                                  | 1.25  | 1 | 2  | 2  | 2   | 1.099 | 0.675 | 0.870 | 0.822 | 2.10   | 1.25  | 2  | 2   | 1204 | 134.2 | 6.05 |
| Q4VCS5 | Angiotensin<br>OS=Homo sapiens<br>GN=AMOT<br>PE=1 SV=1 - [AMOT_HUMAN]                                                    | 3.04  | 1 | 1  | 3  | 3   | 1.106 | 0.464 | 0.319 | 0.822 | 2.07   | 3.04  | 3  | 3   | 1084 | 118.0 | 7.64 |
| Q9BSB4 | Autophagy-related protein 101 OS=Homo sapiens<br>GN=ATG101<br>PE=1 SV=1 - [ATG1_HUMAN]                                   | 11.47 | 1 | 2  | 2  | 2   | 1.076 | 1.137 | 1.171 | 0.822 | 4.58   | 11.47 | 2  | 2   | 218  | 25.0  | 6.15 |
| Q9P2J5 | Leucine--tRNA ligase, cytoplasmic<br>OS=Homo sapiens<br>GN=LARS PE=1 SV=2 - [SYLC_HUMAN]                                 | 34.10 | 1 | 36 | 36 | 156 | 0.711 | 0.852 | 0.883 | 0.822 | 371.63 | 34.10 | 55 | 156 | 1176 | 134.4 | 7.30 |
| Q16658 | Fascin<br>OS=Homo sapiens<br>GN=FSCN1<br>PE=1 SV=3 - [FSCN1_HUMAN]                                                       | 57.20 | 1 | 26 | 26 | 315 | 1.119 | 0.650 | 0.866 | 0.822 | 758.17 | 57.20 | 45 | 315 | 493  | 54.5  | 7.24 |
| P52848 | Bifunctional heparan sulfate N-deacetylase/N-sulfotransferase 1 OS=Homo sapiens<br>GN=NDST1<br>PE=1 SV=1 - [NDST1_HUMAN] | 1.13  | 1 | 1  | 1  | 1   | 0.884 | 0.723 | 1.097 | 0.822 | 0.00   | 1.13  | 1  | 1   | 882  | 100.8 | 7.97 |
| Q9NZD2 | Glycolipid transfer protein<br>OS=Homo sapiens<br>GN=GLTP PE=1 SV=3 - [GLTP_HUMAN]                                       | 16.27 | 1 | 4  | 4  | 14  | 0.800 | 1.286 | 1.105 | 0.822 | 33.81  | 16.27 | 6  | 14  | 209  | 23.8  | 7.39 |
| Q12766 | HMG domain-containing protein 3<br>OS=Homo sapiens<br>GN=HMGXB3<br>PE=2 SV=2 - [HMGXB3_HUMAN]                            | 1.50  | 1 | 2  | 2  | 2   | 2.490 | 1.605 | 1.564 | 0.822 | 5.01   | 1.50  | 2  | 2   | 1538 | 168.2 | 8.05 |
| Q9C0H6 | Kelch-like protein 4<br>OS=Homo sapiens<br>GN=KLHL4<br>PE=1 SV=2 - [KLHL4_HUMAN]                                         | 2.92  | 2 | 2  | 2  | 2   | 0.912 | 0.967 | 1.220 | 0.822 | 2.23   | 2.92  | 2  | 2   | 718  | 80.2  | 6.86 |

|        |                                                                                                               |       |   |    |    |     |       |       |       |       |        |       |    |     |     |      |      |
|--------|---------------------------------------------------------------------------------------------------------------|-------|---|----|----|-----|-------|-------|-------|-------|--------|-------|----|-----|-----|------|------|
| Q9H981 | Actin-related protein 8<br>OS=Homo sapiens<br>GN=ACTR8<br>PE=1 SV=2 - [ARP8_HUMAN]                            | 1.92  | 1 | 1  | 1  | 1   | 0.710 | 0.667 | 0.686 | 0.822 | 2.13   | 1.92  | 1  | 1   | 624 | 70.4 | 7.78 |
| Q9Y4K4 | Mitogen-activated protein kinase kinase kinase 5<br>OS=Homo sapiens<br>GN=MAP4K5<br>PE=1 SV=1 - [M4K5_HUMAN]  | 10.05 | 1 | 8  | 8  | 19  | 0.659 | 0.862 | 0.780 | 0.822 | 42.23  | 10.05 | 14 | 19  | 846 | 95.0 | 7.64 |
| Q9BV57 | 1,2-dihydroxy-3-keto-5-methylthiopentene dioxygenase<br>OS=Homo sapiens<br>GN=ADI1 PE=1 SV=1 - [MTND_HUMAN]   | 50.84 | 1 | 6  | 6  | 13  | 1.241 | 1.234 | 1.242 | 0.823 | 28.07  | 50.84 | 11 | 13  | 179 | 21.5 | 5.68 |
| P49902 | Cytosolic purine 5'-nucleotidase<br>OS=Homo sapiens<br>GN=NT5C2<br>PE=1 SV=1 - [5NTC_HUMAN]                   | 37.25 | 1 | 17 | 17 | 40  | 1.242 | 0.424 | 0.670 | 0.823 | 93.24  | 37.25 | 24 | 40  | 561 | 64.9 | 6.14 |
| Q6NXE6 | Armadillo repeat-containing protein 6<br>OS=Homo sapiens<br>GN=ARMC6<br>PE=1 SV=2 - [ARMC6_HUMA]              | 8.18  | 1 | 5  | 5  | 10  | 0.906 | 0.772 | 1.040 | 0.823 | 24.78  | 8.18  | 8  | 10  | 501 | 54.1 | 6.24 |
| Q8WUB2 | Protein FAM216A<br>OS=Homo sapiens<br>GN=FAM216A<br>PE=2 SV=1 - [F216A_HUMAN]                                 | 15.02 | 1 | 2  | 2  | 3   | 0.277 | 1.196 | 0.833 | 0.823 | 2.07   | 15.02 | 2  | 3   | 273 | 30.8 | 9.33 |
| Q02809 | Procollagen-lysine,2-oxoglutarate 5-dioxygenase 1<br>OS=Homo sapiens<br>GN=PLOD1<br>PE=1 SV=2 - [PLOD1_HUMAN] | 47.87 | 1 | 30 | 31 | 125 | 0.768 | 0.909 | 1.028 | 0.823 | 340.57 | 47.87 | 49 | 125 | 727 | 83.5 | 6.95 |
| O00499 | Myc box-dependent-interacting protein 1<br>OS=Homo sapiens<br>GN=BINI1 PE=1 SV=1 - [BIN1_HUMAN]               | 34.06 | 1 | 15 | 15 | 63  | 0.930 | 0.725 | 0.871 | 0.823 | 163.06 | 34.06 | 24 | 63  | 593 | 64.7 | 5.06 |
| Q96SQ9 | Cytochrome P450 2S1<br>OS=Homo sapiens<br>GN=CYP2S1<br>PE=2 SV=2 - [CP2S1_HUMAN]                              | 11.31 | 1 | 5  | 5  | 14  | 3.227 | 0.750 | 1.119 | 0.823 | 35.04  | 11.31 | 7  | 14  | 504 | 55.8 | 8.62 |

|        |                                                                                                                                |       |   |    |    |      |       |       |       |       |        |       |    |      |      |       |      |
|--------|--------------------------------------------------------------------------------------------------------------------------------|-------|---|----|----|------|-------|-------|-------|-------|--------|-------|----|------|------|-------|------|
| P54252 | Ataxin-3<br>OS=Homo sapiens<br>GN=ATXN3<br>PE=1 SV=4 - [ATX3_HUMAN]                                                            | 11.26 | 1 | 4  | 4  | 6    | 0.751 | 1.146 | 0.935 | 0.823 | 11.97  | 11.26 | 5  | 6    | 364  | 41.8  | 4.91 |
| Q86SF2 | N-acetylgalactosaminyltransferase 7<br>OS=Homo sapiens<br>GN=GALNT7<br>PE=1 SV=1 - [GALNT7_HUMAN]                              | 12.02 | 1 | 6  | 6  | 17   | 0.802 | 1.260 | 0.955 | 0.823 | 39.35  | 12.02 | 9  | 17   | 657  | 75.3  | 7.11 |
| O43294 | Transforming growth factor beta-1-induced transcript 1 protein<br>OS=Homo sapiens<br>GN=TGFB1I1<br>PE=1 SV=2 - [TGFB1I1_HUMAN] | 22.78 | 1 | 7  | 7  | 66   | 0.862 | 1.164 | 1.820 | 0.823 | 208.76 | 22.78 | 9  | 66   | 461  | 49.8  | 7.03 |
| Q6NZI2 | Polymerase I and transcript release factor<br>OS=Homo sapiens<br>GN=PTRF<br>PE=1 SV=1 - [PTRF_HUMAN]                           | 42.56 | 1 | 23 | 23 | 343  | 1.838 | 0.992 | 1.396 | 0.823 | 788.95 | 42.56 | 34 | 343  | 390  | 43.4  | 5.60 |
| Q9Y4D7 | Plexin-D1<br>OS=Homo sapiens<br>GN=PLXND1<br>PE=1 SV=3 - [PLXD1_HUMAN]                                                         | 0.52  | 1 | 1  | 1  | 1    | 1.202 | 0.541 | 0.440 | 0.823 | 0.00   | 0.52  | 1  | 1    | 1925 | 211.9 | 7.15 |
| O75330 | Hyaluronan mediated motility receptor<br>OS=Homo sapiens<br>GN=HMMR<br>PE=1 SV=2 - [HMMR_HUMAN]                                | 7.46  | 1 | 4  | 6  | 9    | 0.634 | 0.851 | 0.887 | 0.823 | 17.79  | 7.46  | 6  | 9    | 724  | 84.0  | 5.83 |
| Q15035 | Translocating chain-associated membrane protein 2<br>OS=Homo sapiens<br>GN=TRAM2<br>PE=1 SV=1 - [TRAM2_HUMAN]                  | 2.97  | 1 | 1  | 1  | 7    | 1.162 | 1.138 | 1.143 | 0.823 | 17.12  | 2.97  | 2  | 7    | 370  | 43.3  | 9.22 |
| P60709 | Actin, cytoplasmic 1<br>OS=Homo sapiens<br>GN=ACTB<br>PE=1 SV=1 - [ACTB_HUMAN]                                                 | 79.73 | 2 | 12 | 38 | 4774 | 0.978 | 0.976 | 1.180 | 0.823 | #####  | 79.73 | 67 | 4774 | 375  | 41.7  | 5.48 |
| Q9Y5A7 | NEDD8 ultimate buster 1<br>OS=Homo sapiens<br>GN=NUB1<br>PE=1 SV=2 - [NUB1_HUMAN]                                              | 10.08 | 1 | 5  | 8  | 17   | 1.006 | 1.020 | 0.940 | 0.823 | 39.64  | 10.08 | 10 | 17   | 615  | 70.5  | 5.96 |

|        |                                                                                                                       |       |   |    |    |    |       |       |       |       |        |       |    |    |      |       |      |
|--------|-----------------------------------------------------------------------------------------------------------------------|-------|---|----|----|----|-------|-------|-------|-------|--------|-------|----|----|------|-------|------|
| P00568 | Adenylate kinase isoenzyme 1<br>OS=Homo sapiens<br>GN=AK1 PE=1 SV=3 - [KAD1_HUMAN]                                    | 57.22 | 1 | 11 | 12 | 84 | 1.173 | 1.058 | 1.216 | 0.824 | 206.90 | 57.22 | 17 | 84 | 194  | 21.6  | 8.63 |
| Q9NR20 | Dual specificity tyrosine-phosphorylation-regulated kinase 4<br>OS=Homo sapiens<br>GN=DYRK4 PE=1 SV=2 - [DYRK4_HUMAN] | 3.08  | 1 | 2  | 2  | 3  | 0.816 | 0.916 | 1.158 | 0.824 | 5.53   | 3.08  | 2  | 3  | 520  | 59.6  | 8.90 |
| Q9NSB8 | Homer protein homolog 2<br>OS=Homo sapiens<br>GN=HOMER2 PE=1 SV=1 - [HOMER2_HUMAN]                                    | 7.63  | 1 | 2  | 3  | 4  | 0.815 | 0.943 | 1.011 | 0.824 | 8.07   | 7.63  | 3  | 4  | 354  | 40.6  | 6.38 |
| Q8N668 | COMM domain-containing protein 1<br>OS=Homo sapiens<br>GN=COMMD1 PE=1 SV=1 - [COMMD1_HUMAN]                           | 26.32 | 1 | 3  | 4  | 8  | 1.070 | 1.280 | 1.568 | 0.824 | 13.66  | 26.32 | 4  | 8  | 190  | 21.2  | 6.20 |
| O95359 | Transforming acidic coiled-coil-containing protein 2<br>OS=Homo sapiens<br>GN=TACC2 PE=1 SV=3 - [TACC2_HUMAN]         | 1.90  | 1 | 2  | 5  | 19 | 0.260 | 0.708 | 1.693 | 0.824 | 48.77  | 1.90  | 6  | 19 | 2948 | 309.2 | 4.79 |
| Q6PI77 | Protein BHLH9<br>OS=Homo sapiens<br>GN=BHLH9 PE=2 SV=1 - [BHLH9_HUMAN]                                                | 2.56  | 1 | 1  | 2  | 8  | 0.870 | 0.927 | 1.222 | 0.824 | 14.71  | 2.56  | 2  | 8  | 547  | 60.3  | 7.58 |
| P59998 | Actin-related protein 2/3 complex subunit 4<br>OS=Homo sapiens<br>GN=ARPC4 PE=1 SV=3 - [ARPC4_HUMAN]                  | 45.83 | 1 | 8  | 8  | 89 | 0.825 | 0.737 | 0.933 | 0.825 | 197.93 | 45.83 | 13 | 89 | 168  | 19.7  | 8.43 |
| P61803 | Dolichyl-diphosphooligoglycosyltransferase subunit DAD1<br>OS=Homo sapiens<br>GN=DAD1 PE=1 SV=3 - [DAD1_HUMAN]        | 19.47 | 1 | 2  | 2  | 16 | 0.554 | 0.574 | 0.662 | 0.825 | 43.91  | 19.47 | 4  | 16 | 113  | 12.5  | 7.08 |

|        |                                                                                                                            |       |   |    |    |     |       |       |       |       |        |       |    |     |      |       |       |
|--------|----------------------------------------------------------------------------------------------------------------------------|-------|---|----|----|-----|-------|-------|-------|-------|--------|-------|----|-----|------|-------|-------|
| Q04446 | 1,4-alpha-glucan-branching enzyme<br>OS=Homo sapiens<br>GN=GBE1<br>PE=1 SV=3 - [GLGB_HUMAN]                                | 40.88 | 1 | 28 | 29 | 215 | 0.968 | 0.692 | 0.921 | 0.825 | 472.02 | 40.88 | 49 | 215 | 702  | 80.4  | 6.32  |
| P36969 | Phospholipid hydroperoxide glutathione peroxidase, mitochondrial<br>OS=Homo sapiens<br>GN=GPX4<br>PE=1 SV=3 - [GPX4_HUMAN] | 40.10 | 1 | 8  | 8  | 36  | 1.247 | 0.950 | 0.988 | 0.825 | 87.12  | 40.10 | 14 | 36  | 197  | 22.2  | 8.37  |
| Q8NHM5 | Lysine-specific demethylase 2B<br>OS=Homo sapiens<br>GN=KDM2B<br>PE=1 SV=1 - [KDM2B_HUMAN]                                 | 0.97  | 1 | 1  | 1  | 1   | 1.046 | 1.110 | 0.817 | 0.825 | 0.00   | 0.97  | 1  | 1   | 1336 | 152.5 | 8.56  |
| Q15311 | RalA-binding protein 1<br>OS=Homo sapiens<br>GN=RALBP1<br>PE=1 SV=3 - [RBP1_HUMAN]                                         | 7.02  | 1 | 4  | 4  | 6   | 0.683 | 0.839 | 0.857 | 0.825 | 13.67  | 7.02  | 4  | 6   | 655  | 76.0  | 5.88  |
| Q9NRW3 | DNA dC->dU-editing enzyme APOBEC-3C<br>OS=Homo sapiens<br>GN=APOBEC3C<br>PE=1 SV=2 - [ABC3C_HUMAN]                         | 3.16  | 1 | 1  | 1  | 1   | 0.864 | 0.706 | 0.755 | 0.825 | 0.00   | 3.16  | 1  | 1   | 190  | 22.8  | 7.59  |
| B3KS81 | Serine/arginine repetitive matrix protein 5<br>OS=Homo sapiens<br>GN=SRRM5<br>PE=1 SV=3 - [SRRM5_HUMAN]                    | 1.68  | 1 | 1  | 1  | 5   | 1.393 | 1.356 | 1.785 | 0.825 | 9.56   | 1.68  | 1  | 5   | 715  | 80.3  | 12.06 |
| Q14BN4 | Sarcolemmal membrane-associated protein<br>OS=Homo sapiens<br>GN=SLMAP<br>PE=1 SV=1 - [SLMAP_HUMAN]                        | 17.51 | 1 | 15 | 16 | 37  | 0.705 | 2.106 | 2.001 | 0.825 | 84.21  | 17.51 | 23 | 37  | 828  | 95.1  | 5.47  |
| Q9NQW7 | Xaa-Pro aminopeptidase 1<br>OS=Homo sapiens<br>GN=XPNEP1<br>PE=1 SV=3 - [XPP1_HUMAN]                                       | 27.93 | 1 | 17 | 18 | 52  | 0.895 | 0.703 | 0.797 | 0.825 | 151.30 | 27.93 | 28 | 52  | 623  | 69.9  | 5.67  |
| Q5SW79 | Centrosomal protein of 170 kDa<br>OS=Homo sapiens<br>GN=CEP170<br>PE=1 SV=1 - [CE170_HUMAN]                                | 22.35 | 2 | 31 | 32 | 91  | 0.741 | 1.107 | 1.010 | 0.825 | 207.26 | 22.35 | 51 | 91  | 1584 | 175.2 | 7.11  |



|        |                                                                                                                     |       |   |    |    |     |       |       |       |       |         |       |    |     |      |       |      |
|--------|---------------------------------------------------------------------------------------------------------------------|-------|---|----|----|-----|-------|-------|-------|-------|---------|-------|----|-----|------|-------|------|
| Q15477 | Helicase SKI2W<br>OS=Homo sapiens<br>GN=SKI2L<br>PE=1 SV=3 - [SKI2_HUMAN]                                           | 16.61 | 1 | 18 | 19 | 75  | 0.918 | 0.913 | 0.994 | 0.825 | 156.21  | 16.61 | 35 | 75  | 1246 | 137.7 | 6.06 |
| O43237 | Cytoplasmic dynein 1 light intermediate chain 2<br>OS=Homo sapiens<br>GN=DYNC1LI2<br>PE=1 SV=1 - [DC1L2_HUMAN]      | 45.12 | 1 | 16 | 17 | 68  | 0.962 | 1.108 | 1.143 | 0.826 | 166.70  | 45.12 | 26 | 68  | 492  | 54.1  | 6.38 |
| Q6ZUI0 | Tumor protein p63-regulated gene 1 protein<br>OS=Homo sapiens<br>GN=TPRG1<br>PE=2 SV=1 - [TPRG1_HUMAN]              | 3.27  | 1 | 1  | 1  | 1   | 0.699 | 0.971 | 0.888 | 0.826 | 2.20    | 3.27  | 1  | 1   | 275  | 31.2  | 7.09 |
| Q92633 | Lysophosphatidic acid receptor 1<br>OS=Homo sapiens<br>GN=LPAR1<br>PE=1 SV=3 - [LPAR1_HUMAN]                        | 2.47  | 1 | 1  | 1  | 3   | 1.574 | 0.465 | 0.424 | 0.826 | 2.37    | 2.47  | 2  | 3   | 364  | 41.1  | 8.53 |
| Q8WW24 | Tektin-4<br>OS=Homo sapiens<br>GN=TEKT4<br>PE=2 SV=1 - [TEKT4_HUMAN]                                                | 2.99  | 2 | 1  | 2  | 4   | 1.589 | 1.054 | 0.957 | 0.826 | 9.16    | 2.99  | 2  | 4   | 435  | 50.6  | 6.44 |
| P05556 | Integrin beta-1<br>OS=Homo sapiens<br>GN=ITGB1<br>PE=1 SV=2 - [ITB1_HUMAN]                                          | 28.57 | 1 | 26 | 26 | 610 | 0.865 | 0.986 | 1.082 | 0.826 | 1378.20 | 28.57 | 46 | 610 | 798  | 88.4  | 5.39 |
| Q8IWE2 | Protein NOXP20<br>OS=Homo sapiens<br>GN=FAM114A1<br>PE=1 SV=2 - [NXP20_HUMAN]                                       | 40.67 | 1 | 19 | 19 | 79  | 0.859 | 0.914 | 1.110 | 0.826 | 197.46  | 40.67 | 29 | 79  | 563  | 60.7  | 4.68 |
| O75298 | Reticulon-2<br>OS=Homo sapiens<br>GN=RTN2<br>PE=1 SV=1 - [RTN2_HUMAN]                                               | 5.69  | 1 | 2  | 2  | 2   | 1.022 | 0.341 | 0.468 | 0.826 | 2.05    | 5.69  | 2  | 2   | 545  | 59.2  | 5.31 |
| P78356 | Phosphatidylinositol 5-phosphate 4-kinase type-2 beta<br>OS=Homo sapiens<br>GN=PIP4K2B<br>PE=1 SV=1 - [PI42B_HUMAN] | 21.63 | 1 | 5  | 10 | 28  | 0.990 | 0.846 | 1.001 | 0.826 | 60.03   | 21.63 | 14 | 28  | 416  | 47.3  | 7.33 |

|        |                                                                                                                                                      |       |   |    |    |     |       |       |       |       |        |       |    |     |      |       |       |
|--------|------------------------------------------------------------------------------------------------------------------------------------------------------|-------|---|----|----|-----|-------|-------|-------|-------|--------|-------|----|-----|------|-------|-------|
| Q9Y673 | Dolichyl-phosphate beta-glucosyltransferase OS=Homo sapiens GN=ALG5 PE=1 SV=1 - [ALG5_HUMAN]<br>Inactive hydroxysteroid dehydrogenase-like protein 1 | 16.98 | 1 | 5  | 5  | 16  | 1.145 | 0.714 | 0.641 | 0.826 | 36.74  | 16.98 | 9  | 16  | 324  | 36.9  | 9.28  |
| Q3SXM5 | OS=Homo sapiens GN=HSDL1 PE=1 SV=3 - [HSDL1_HUMAN]<br>Serine/threonine-protein phosphatase 6 regulatory subunit 3                                    | 11.21 | 1 | 4  | 4  | 11  | 1.094 | 0.812 | 0.902 | 0.826 | 29.24  | 11.21 | 7  | 11  | 330  | 37.0  | 8.72  |
| Q5H9R7 | OS=Homo sapiens GN=PPP6R3 PE=1 SV=2 - [PPP6R3_HUMAN]<br>Calcium-dependent secretion activator 1                                                      | 11.23 | 1 | 9  | 9  | 20  | 0.775 | 1.042 | 1.127 | 0.826 | 48.97  | 11.23 | 14 | 20  | 873  | 97.6  | 4.60  |
| Q9ULL8 | OS=Homo sapiens GN=CADPS PE=1 SV=3 - [CADPS1_HUMAN]<br>p53 and DNA damage-regulated protein 1                                                        | 3.18  | 1 | 3  | 3  | 5   | 0.973 | 1.095 | 0.945 | 0.826 | 2.14   | 3.18  | 3  | 5   | 1353 | 152.7 | 5.71  |
| Q9NUG6 | OS=Homo sapiens GN=PDRG1 PE=1 SV=2 - [PDRG1_HUMAN]<br>Protein downstream neighbor of Son                                                             | 21.80 | 1 | 3  | 3  | 4   | 0.919 | 0.984 | 0.793 | 0.827 | 6.75   | 21.80 | 4  | 4   | 133  | 15.5  | 6.06  |
| Q9NYP3 | OS=Homo sapiens GN=DONSON PE=1 SV=2 - [DONS_HUMAN]<br>40S ribosomal protein S13                                                                      | 4.95  | 1 | 1  | 1  | 2   |       | 1.597 |       | 0.827 | 5.16   | 4.95  | 1  | 2   | 566  | 62.7  | 8.66  |
| P62277 | OS=Homo sapiens GN=RPS13 PE=1 SV=2 - [RS13_HUMAN]<br>Serine/threonine-protein kinase Nek9                                                            | 42.38 | 1 | 8  | 8  | 145 | 0.962 | 0.625 | 0.692 | 0.827 | 295.65 | 42.38 | 12 | 145 | 151  | 17.2  | 10.54 |
| Q8TD19 | OS=Homo sapiens GN=NEK9 PE=1 SV=2 - [NEK9_HUMAN]                                                                                                     | 15.22 | 1 | 15 | 15 | 80  | 0.494 | 1.106 | 1.133 | 0.827 | 213.97 | 15.22 | 22 | 80  | 979  | 107.1 | 5.74  |

|        |                                                                                                                                                                                                                                                                                                                                                                                                                                                                                                                                                                                                                                                                                                                                                                                                                                                         |      |   |    |    |       |       |       |       |       |       |      |    |     |      |       |      |
|--------|---------------------------------------------------------------------------------------------------------------------------------------------------------------------------------------------------------------------------------------------------------------------------------------------------------------------------------------------------------------------------------------------------------------------------------------------------------------------------------------------------------------------------------------------------------------------------------------------------------------------------------------------------------------------------------------------------------------------------------------------------------------------------------------------------------------------------------------------------------|------|---|----|----|-------|-------|-------|-------|-------|-------|------|----|-----|------|-------|------|
| Q7Z3J2 | UPF0505<br>protein<br>C16orf62<br>OS=Homo<br>sapiens<br>GN=C16orf62<br>PE=1 SV=2 -<br>[CP062_HUMAN<br>]<br>WD repeat-<br>containing<br>protein 61<br>OS=Homo<br>sapiens<br>GN=WDR61<br>PE=1 SV=1 -<br>[WDR61_HUMA<br>N]<br>Beta-parvin<br>OS=Homo<br>sapiens<br>GN=PARVB<br>PE=1 SV=1 -<br>[PARVB_HUMAN<br>]<br>DnaJ homolog<br>subfamily C<br>member 1<br>OS=Homo<br>sapiens<br>GN=DNAJ1<br>PE=1 SV=1 -<br>[DNJC1_HUMAN<br>]<br>AP-3 complex<br>subunit mu-1<br>OS=Homo<br>sapiens<br>GN=AP3M1<br>PE=1 SV=1 -<br>[AP3M1_HUMA<br>N]<br>Ubiquitin-<br>conjugating<br>enzyme E2 H<br>OS=Homo<br>sapiens<br>GN=LCMT1<br>PE=1 SV=2 -<br>[LCMT1_HUMAN<br>]<br>Zinc finger<br>protein 501<br>OS=Homo<br>sapiens<br>GN=ZNF501<br>PE=2 SV=2 -<br>[ZNF501_HUMAN<br>]<br>Protein<br>FAM35A<br>OS=Homo<br>sapiens<br>GN=FAM35A<br>PE=2 SV=1 -<br>[FA35A_HUMAN<br>] | 9.35 | 1 | 8  | 8  | 16    | 0.971 | 0.751 | 0.949 | 0.827 | 34.48 | 9.35 | 10 | 16  | 963  | 109.5 | 7.21 |
| Q9GZS3 | 32.46                                                                                                                                                                                                                                                                                                                                                                                                                                                                                                                                                                                                                                                                                                                                                                                                                                                   | 1    | 8 | 8  | 26 | 1.052 | 0.854 | 0.952 | 0.827 | 72.73 | 32.46 | 11   | 26 | 305 | 33.6 | 5.47  |      |
| Q9HBI1 | 11.54                                                                                                                                                                                                                                                                                                                                                                                                                                                                                                                                                                                                                                                                                                                                                                                                                                                   | 1    | 2 | 4  | 9  | 0.898 | 0.682 | 1.157 | 0.827 | 20.61 | 11.54 | 6    | 9  | 364 | 41.7 | 6.73  |      |
| Q96KC8 | 16.06                                                                                                                                                                                                                                                                                                                                                                                                                                                                                                                                                                                                                                                                                                                                                                                                                                                   | 1    | 9 | 9  | 24 | 0.752 | 0.871 | 0.617 | 0.827 | 46.72 | 16.06 | 12   | 24 | 554 | 63.8 | 8.63  |      |
| Q9Y2T2 | 26.79                                                                                                                                                                                                                                                                                                                                                                                                                                                                                                                                                                                                                                                                                                                                                                                                                                                   | 1    | 7 | 10 | 38 | 0.970 | 0.985 | 0.922 | 0.827 | 78.36 | 26.79 | 15   | 38 | 418 | 46.9 | 6.93  |      |
| P62256 | 34.97                                                                                                                                                                                                                                                                                                                                                                                                                                                                                                                                                                                                                                                                                                                                                                                                                                                   | 1    | 7 | 7  | 18 | 1.290 | 1.089 | 0.993 | 0.828 | 38.71 | 34.97 | 9    | 18 | 183 | 20.6 | 4.67  |      |
| Q9UIC8 | 22.16                                                                                                                                                                                                                                                                                                                                                                                                                                                                                                                                                                                                                                                                                                                                                                                                                                                   | 1    | 8 | 8  | 15 | 1.185 | 0.819 | 0.965 | 0.828 | 30.21 | 22.16 | 11   | 15 | 334 | 38.4 | 6.04  |      |
| Q96CX3 | 14.76                                                                                                                                                                                                                                                                                                                                                                                                                                                                                                                                                                                                                                                                                                                                                                                                                                                   | 94   | 1 | 2  | 3  | 0.907 | 0.513 | 1.476 | 0.828 | 2.34  | 14.76 | 2    | 3  | 271 | 31.2 | 9.19  |      |
| Q86V20 | 2.75                                                                                                                                                                                                                                                                                                                                                                                                                                                                                                                                                                                                                                                                                                                                                                                                                                                    | 1    | 1 | 2  | 6  | 1.509 | 1.014 | 1.472 | 0.828 | 14.66 | 2.75  | 2    | 6  | 835 | 93.6 | 6.86  |      |

|        |                                                                                                           |       |   |    |    |     |       |       |       |       |        |       |    |     |      |       |      |
|--------|-----------------------------------------------------------------------------------------------------------|-------|---|----|----|-----|-------|-------|-------|-------|--------|-------|----|-----|------|-------|------|
| Q9HIY0 | Autophagy protein 5<br>OS=Homo sapiens<br>GN=ATG5<br>PE=1 SV=2 - [ATG5_HUMAN]                             | 13.82 | 1 | 3  | 3  | 11  | 0.917 | 0.800 | 0.726 | 0.828 | 27.13  | 13.82 | 5  | 11  | 275  | 32.4  | 5.77 |
| Q8IVF4 | Dynein heavy chain 10, axonemal<br>OS=Homo sapiens<br>GN=DNAH10<br>PE=1 SV=4 - [DYH10_HUMAN]              | 1.36  | 1 | 4  | 6  | 7   | 1.282 | 0.922 | 0.813 | 0.828 | 8.67   | 1.36  | 6  | 7   | 4471 | 514.5 | 5.88 |
| Q03426 | Mevalonate kinase<br>OS=Homo sapiens<br>GN=MVK PE=1 SV=1 - [KIME_HUMAN]                                   | 13.89 | 1 | 3  | 3  | 11  | 1.012 | 0.604 | 0.939 | 0.828 | 21.10  | 13.89 | 5  | 11  | 396  | 42.4  | 6.46 |
| Q9GZX9 | Twisted gastrulation protein homolog 1<br>OS=Homo sapiens<br>GN=TWSG1<br>PE=2 SV=1 - [TWSG1_HUMAN]        | 15.25 | 1 | 3  | 3  | 22  | 1.152 | 1.025 | 0.956 | 0.828 | 51.89  | 15.25 | 6  | 22  | 223  | 25.0  | 5.34 |
| Q8IWB6 | Inactive serine/threonine kinase TEX14<br>OS=Homo sapiens<br>GN=TEX14<br>PE=1 SV=2 - [TEX14_HUMAN]        | 1.54  | 1 | 2  | 2  | 2   | 0.748 | 0.902 | 0.838 | 0.828 | 0.00   | 1.54  | 2  | 2   | 1497 | 167.8 | 5.15 |
| Q8WWX9 | Selenoprotein M<br>OS=Homo sapiens<br>GN=SELM<br>PE=1 SV=3 - [SELM_HUMAN]                                 | 35.86 | 1 | 5  | 5  | 32  | 0.890 | 0.928 | 0.899 | 0.829 | 81.42  | 35.86 | 8  | 32  | 145  | 16.2  | 5.54 |
| Q16181 | Septin-7<br>OS=Homo sapiens<br>GN=SEPT7<br>PE=1 SV=2 - [SEPT7_HUMAN]                                      | 64.99 | 2 | 33 | 35 | 343 | 0.828 | 0.946 | 0.969 | 0.829 | 881.54 | 64.99 | 59 | 343 | 437  | 50.6  | 8.63 |
| Q16775 | Hydroxyacylglutathione hydrolase, mitochondrial<br>OS=Homo sapiens<br>GN=HAGH<br>PE=1 SV=2 - [GLO2_HUMAN] | 27.27 | 1 | 6  | 6  | 42  | 1.105 | 0.996 | 1.217 | 0.829 | 121.72 | 27.27 | 10 | 42  | 308  | 33.8  | 8.12 |
| Q9HBL8 | NmrA-like family domain-containing protein 1<br>OS=Homo sapiens<br>GN=NMRAL1<br>PE=1 SV=1 - [NMRL1_HUMAN] | 22.41 | 1 | 7  | 7  | 19  | 1.031 | 1.178 | 1.266 | 0.829 | 36.54  | 22.41 | 10 | 19  | 299  | 33.3  | 7.52 |

|        |                                                                                                                   |       |   |    |    |     |       |       |       |       |        |       |    |     |      |       |      |
|--------|-------------------------------------------------------------------------------------------------------------------|-------|---|----|----|-----|-------|-------|-------|-------|--------|-------|----|-----|------|-------|------|
| Q9UGC6 | Regulator of G-protein signaling 17<br>OS=Homo sapiens<br>GN=RGS17<br>PE=1 SV=2 - [RGS17_HUMAN]                   | 5.71  | 1 | 1  | 1  | 1   | 0.536 | 1.038 | 0.579 | 0.829 | 1.98   | 5.71  | 1  | 1   | 210  | 24.3  | 5.71 |
| Q5T160 | Probable arginine--tRNA ligase, mitochondrial<br>OS=Homo sapiens<br>GN=RARS2<br>PE=1 SV=1 - [SYRM_HUMAN]          | 20.42 | 1 | 12 | 12 | 34  | 1.004 | 0.859 | 1.102 | 0.829 | 65.38  | 20.42 | 20 | 34  | 578  | 65.5  | 8.21 |
| Q96GX9 | Methylthioribulose-1-phosphate dehydratase<br>OS=Homo sapiens<br>GN=APIP PE=1 SV=1 - [MTNB_HUMAN]                 | 16.94 | 1 | 4  | 4  | 15  | 0.876 | 0.935 | 1.117 | 0.829 | 33.05  | 16.94 | 6  | 15  | 242  | 27.1  | 7.12 |
| O00470 | Homeobox protein Meis1<br>OS=Homo sapiens<br>GN=MEIS1<br>PE=1 SV=1 - [MEIS1_HUMAN]                                | 5.90  | 4 | 2  | 2  | 3   | 0.557 | 2.049 | 1.058 | 0.829 | 8.77   | 5.90  | 2  | 3   | 390  | 43.0  | 6.33 |
| Q9HAV0 | Guanine nucleotide-binding protein subunit beta-4<br>OS=Homo sapiens<br>GN=GNB4<br>PE=1 SV=3 - [GBB4_HUMAN]       | 19.41 | 1 | 2  | 5  | 20  | 1.011 | 1.526 | 1.021 | 0.829 | 51.97  | 19.41 | 8  | 20  | 340  | 37.5  | 6.00 |
| Q96RR4 | Calcium/calmodulin-dependent protein kinase kinase 2<br>OS=Homo sapiens<br>GN=CAMKK2<br>PE=1 SV=2 - [KKCC2_HUMAN] | 8.33  | 1 | 5  | 5  | 10  | 0.957 | 0.983 | 1.100 | 0.830 | 16.68  | 8.33  | 8  | 10  | 588  | 64.7  | 6.68 |
| Q14974 | Importin subunit beta-1<br>OS=Homo sapiens<br>GN=KPMB1<br>PE=1 SV=2 - [IMB1_HUMAN]                                | 35.62 | 1 | 26 | 26 | 292 | 0.850 | 0.990 | 0.867 | 0.830 | 740.81 | 35.62 | 46 | 292 | 876  | 97.1  | 4.78 |
| Q07889 | Son of sevenless homolog 1<br>OS=Homo sapiens<br>GN=SOS1<br>PE=1 SV=1 - [SOS1_HUMAN]                              | 3.83  | 1 | 5  | 5  | 14  | 0.756 | 1.497 | 1.134 | 0.830 | 17.76  | 3.83  | 6  | 14  | 1333 | 152.4 | 6.84 |

|        |                                                                                                                               |       |   |    |    |    |       |       |       |       |       |       |    |    |      |       |      |
|--------|-------------------------------------------------------------------------------------------------------------------------------|-------|---|----|----|----|-------|-------|-------|-------|-------|-------|----|----|------|-------|------|
| Q9NZZ3 | Charged multivesicular body protein 5<br>OS=Homo sapiens<br>GN=CHMP5<br>PE=1 SV=1 - [CHMP5_HUMAN]                             | 36.07 | 1 | 6  | 6  | 19 | 1.099 | 0.913 | 0.984 | 0.830 | 45.24 | 36.07 | 8  | 19 | 219  | 24.6  | 4.83 |
| Q6QNY0 | Biogenesis of lysosome-related organelles complex 1 subunit 3<br>OS=Homo sapiens<br>GN=BLOC1S3<br>PE=1 SV=1 - [BLOC1S3_HUMAN] | 13.86 | 1 | 2  | 2  | 5  | 0.935 | 0.730 | 0.996 | 0.830 | 6.88  | 13.86 | 4  | 5  | 202  | 21.2  | 5.15 |
| P24043 | Laminin subunit alpha-2<br>OS=Homo sapiens<br>GN=LAMA2<br>PE=1 SV=4 - [LAMA2_HUMAN]                                           | 2.27  | 1 | 7  | 8  | 16 | 1.233 | 0.577 | 0.500 | 0.830 | 31.89 | 2.27  | 11 | 16 | 3122 | 343.7 | 6.40 |
| P10619 | Lysosomal protective protein<br>OS=Homo sapiens<br>GN=CTSA<br>PE=1 SV=2 - [PPGB_HUMAN]                                        | 22.29 | 1 | 10 | 11 | 36 | 0.685 | 0.908 | 0.895 | 0.830 | 73.08 | 22.29 | 16 | 36 | 480  | 54.4  | 6.61 |
| O15230 | Laminin subunit alpha-5<br>OS=Homo sapiens<br>GN=LAMA5<br>PE=1 SV=8 - [LAMA5_HUMAN]                                           | 2.54  | 1 | 6  | 7  | 14 | 1.238 | 0.996 | 1.572 | 0.830 | 16.56 | 2.54  | 9  | 14 | 3695 | 399.5 | 7.02 |
| Q92843 | Bcl-2-like protein 2<br>OS=Homo sapiens<br>GN=BCL2L2<br>PE=1 SV=2 - [BCL2L2_HUMAN]                                            | 5.18  | 1 | 1  | 1  | 1  | 0.986 | 1.091 | 1.528 | 0.830 | 0.00  | 5.18  | 1  | 1  | 193  | 20.7  | 5.34 |
| O95628 | CCR4-NOT transcription complex subunit 4<br>OS=Homo sapiens<br>GN=CNOT4<br>PE=1 SV=3 - [CNOT4_HUMAN]                          | 3.48  | 1 | 1  | 1  | 4  | 0.693 | 1.277 | 1.449 | 0.830 | 5.59  | 3.48  | 1  | 4  | 575  | 63.5  | 7.03 |
| Q5VWJ9 | Sorting nexin-30<br>OS=Homo sapiens<br>GN=SNX30<br>PE=1 SV=1 - [SNX30_HUMAN]                                                  | 6.41  | 1 | 3  | 3  | 16 | 0.973 | 0.893 | 0.890 | 0.830 | 33.00 | 6.41  | 6  | 16 | 437  | 49.6  | 5.35 |
| Q8NI99 | Angiopoietin-related protein 6<br>OS=Homo sapiens<br>GN=ANGPTL6<br>PE=1 SV=1 - [ANGL6_HUMAN]                                  | 3.62  | 1 | 1  | 1  | 1  | 1.377 | 1.401 | 0.782 | 0.830 | 0.00  | 3.62  | 1  | 1  | 470  | 51.7  | 8.53 |

|        |                                                                                                                                                                                                                                |       |   |   |   |    |       |       |       |       |        |       |    |    |      |       |      |
|--------|--------------------------------------------------------------------------------------------------------------------------------------------------------------------------------------------------------------------------------|-------|---|---|---|----|-------|-------|-------|-------|--------|-------|----|----|------|-------|------|
| Q15067 | Peroxisomal<br>acyl-coenzyme<br>A oxidase 1<br>OS=Homo<br>sapiens<br>GN=ACOX1<br>PE=1 SV=3 -<br>[ACOX1_HUMAN<br>N]                                                                                                             | 13.64 | 1 | 6 | 6 | 9  | 0.779 | 1.228 | 1.066 | 0.830 | 16.79  | 13.64 | 7  | 9  | 660  | 74.4  | 8.16 |
| Q16576 | Histone-binding<br>protein RBBP7<br>OS=Homo<br>sapiens<br>GN=RBBP7<br>PE=1 SV=1 -<br>[RBBP7_HUMAN<br>]                                                                                                                         | 15.53 | 1 | 3 | 8 | 22 | 0.960 | 1.064 | 1.062 | 0.831 | 65.81  | 15.53 | 12 | 22 | 425  | 47.8  | 5.05 |
| Q6ZSS7 | Major<br>facilitator<br>superfamily<br>domain-<br>containing<br>protein 6<br>OS=Homo<br>sapiens<br>GN=MFSD6<br>PE=1 SV=2 -<br>[MFSD6_HUMA<br>Myosin-IIIB<br>OS=Homo<br>sapiens<br>GN=MYO3B<br>PE=2 SV=4 -<br>[MYO3B_HUMA<br>N] | 6.45  | 1 | 2 | 3 | 7  | 1.038 | 0.732 | 0.605 | 0.831 | 16.95  | 6.45  | 4  | 7  | 791  | 88.0  | 5.53 |
| Q8WXR4 | Heme-binding<br>protein 1<br>OS=Homo<br>sapiens<br>GN=HEBP1<br>PE=1 SV=1 -<br>[HEBP1_HUMAN<br>]                                                                                                                                | 0.67  | 1 | 1 | 1 | 1  | 0.846 | 1.141 | 1.308 | 0.831 | 2.32   | 0.67  | 1  | 1  | 1341 | 151.7 | 8.15 |
| Q9NRV9 | Ankyrin repeat<br>domain-<br>containing<br>protein<br>SOWAHB<br>OS=Homo<br>sapiens<br>GN=SOWAHB<br>PE=2 SV=1 -<br>[SWAHB_HUMA<br>N]                                                                                            | 54.50 | 1 | 8 | 8 | 60 | 1.372 | 0.511 | 0.860 | 0.831 | 133.47 | 54.50 | 15 | 60 | 189  | 21.1  | 5.80 |
| A6NEL2 | Putative E3<br>ubiquitin-<br>protein ligase<br>UNKL<br>OS=Homo<br>sapiens<br>GN=UNKL PE=1<br>SV=3 -<br>[UNKL_HUMAN]                                                                                                            | 1.13  | 1 | 1 | 1 | 1  | 1.294 | 0.553 | 0.954 | 0.831 | 2.49   | 1.13  | 1  | 1  | 793  | 85.7  | 9.60 |
| Q9H9P5 | Arylacetamide<br>deacetylase-like<br>3 OS=Homo<br>sapiens<br>GN=AADACL3<br>PE=2 SV=4 -<br>[ADCL3_HUMAN<br>]                                                                                                                    | 4.71  | 1 | 2 | 2 | 4  | 0.846 | 1.343 | 1.437 | 0.831 | 13.20  | 4.71  | 2  | 4  | 680  | 73.8  | 8.06 |
| Q5VUY0 | Kinesin-like<br>protein KIFC1<br>OS=Homo<br>sapiens<br>GN=KIFC1<br>PE=1 SV=2 -<br>[KIFC1_HUMAN<br>]                                                                                                                            | 5.14  | 1 | 1 | 1 | 1  | 0.916 | 0.922 | 1.257 | 0.831 | 0.00   | 5.14  | 1  | 1  | 350  | 39.7  | 7.39 |
| Q9BW19 |                                                                                                                                                                                                                                | 5.20  | 1 | 3 | 3 | 4  | 1.007 | 0.917 | 1.007 | 0.831 | 0.00   | 5.20  | 3  | 4  | 673  | 73.7  | 8.98 |





|        |                                                                                                                                                                                                                        |       |   |     |     |      |       |       |       |       |         |       |     |      |      |       |      |
|--------|------------------------------------------------------------------------------------------------------------------------------------------------------------------------------------------------------------------------|-------|---|-----|-----|------|-------|-------|-------|-------|---------|-------|-----|------|------|-------|------|
| P31749 | RAC-alpha<br>serine/threonin<br>e-protein<br>kinase<br>OS=Homo<br>sapiens<br>GN=AKT1<br>PE=1 SV=2 -<br>[AKT1_HUMAN]<br>Constitutive<br>coactivator of<br>peroxisome<br>proliferator-<br>activated<br>receptor<br>gamma | 18.75 | 2 | 5   | 8   | 12   | 1.067 | 0.732 | 0.822 | 0.832 | 29.24   | 18.75 | 10  | 12   | 480  | 55.7  | 6.07 |
| Q96EK7 | OS=Homo<br>sapiens<br>GN=FAM120B<br>PE=1 SV=1 -<br>[F120B_HUMAN]<br>Muscleblind-like<br>protein 2                                                                                                                      | 10.99 | 1 | 7   | 7   | 12   | 0.768 | 0.937 | 1.202 | 0.832 | 18.70   | 10.99 | 8   | 12   | 910  | 103.7 | 5.69 |
| Q5VZF2 | OS=Homo<br>sapiens<br>GN=MBNL2<br>PE=1 SV=2 -<br>[MBNL2_HUMAN<br>]                                                                                                                                                     | 13.94 | 1 | 2   | 6   | 30   | 0.769 | 0.792 | 0.795 | 0.832 | 47.46   | 13.94 | 9   | 30   | 373  | 40.5  | 8.38 |
| Q9H3H5 | UDP-N-<br>acetylglucosami<br>ne--dolichyl-<br>phosphate N-<br>acetylglucosami<br>nephosphotran<br>sferase<br>OS=Homo<br>sapiens<br>GN=DPAGT1<br>PE=1 SV=2 -<br>[GPT_HUMAN]                                             | 2.45  | 1 | 2   | 2   | 2    | 1.330 | 3.185 | 1.969 | 0.832 | 0.00    | 2.45  | 2   | 2    | 408  | 46.1  | 8.00 |
| Q13813 | Spectrin alpha<br>chain, non-<br>erythrocytic 1<br>OS=Homo<br>sapiens<br>GN=SPTAN1<br>PE=1 SV=3 -<br>[SPTN1_HUMAN<br>]                                                                                                 | 68.81 | 1 | 169 | 170 | 1151 | 1.190 | 1.058 | 0.899 | 0.833 | 2961.27 | 68.81 | 286 | 1151 | 2472 | 284.4 | 5.35 |
| P47813 | Eukaryotic<br>translation<br>initiation factor<br>1A, X-<br>chromosomal<br>OS=Homo<br>sapiens<br>GN=EIF1AX<br>PE=1 SV=2 -<br>[IF1AX_HUMAN<br>]                                                                         | 29.86 | 2 | 6   | 6   | 38   | 0.625 | 0.837 | 0.755 | 0.833 | 93.80   | 29.86 | 11  | 38   | 144  | 16.5  | 5.24 |
| O00148 | ATP-<br>dependent<br>RNA helicase<br>DDX39A<br>OS=Homo<br>sapiens<br>GN=DDX39A<br>PE=1 SV=2 -<br>[DX39A_HUMAN]                                                                                                         | 34.43 | 1 | 4   | 15  | 103  | 1.045 | 0.817 | 0.662 | 0.833 | 191.01  | 34.43 | 23  | 103  | 427  | 49.1  | 5.68 |
| Q13976 | cGMP-<br>dependent<br>protein kinase<br>1 OS=Homo<br>sapiens<br>GN=PRKG1<br>PE=1 SV=3 -<br>[KGP1_HUMAN]                                                                                                                | 29.66 | 4 | 18  | 19  | 64   | 0.976 | 0.638 | 1.156 | 0.833 | 153.73  | 29.66 | 30  | 64   | 671  | 76.3  | 6.04 |

|        |                                                                                                                                                                                          |       |   |    |    |     |       |       |       |       |        |       |    |     |      |       |      |
|--------|------------------------------------------------------------------------------------------------------------------------------------------------------------------------------------------|-------|---|----|----|-----|-------|-------|-------|-------|--------|-------|----|-----|------|-------|------|
| P32321 | Deoxycytidylate<br>deaminase<br>OS=Homo<br>sapiens<br>GN=DCTD<br>PE=1 SV=2 -<br>[DCTD_HUMAN]                                                                                             | 23.03 | 1 | 3  | 3  | 20  | 1.037 | 0.703 | 0.775 | 0.833 | 50.07  | 23.03 | 6  | 20  | 178  | 20.0  | 7.56 |
| P05155 | Plasma<br>protease C1<br>inhibitor<br>OS=Homo<br>sapiens<br>GN=SERPING1<br>PE=1 SV=2 -<br>[IC1_HUMAN]<br>Protein YIF1A<br>OS=Homo<br>sapiens<br>GN=YIF1A<br>PE=1 SV=2 -<br>[YIF1A_HUMAN] | 6.20  | 1 | 3  | 3  | 5   | 0.747 | 1.045 | 0.598 | 0.833 | 10.99  | 6.20  | 5  | 5   | 500  | 55.1  | 6.55 |
| O95070 | RanBP-type<br>and C3HC4-<br>type zinc finger-<br>containing<br>protein 1<br>OS=Homo<br>sapiens<br>GN=RBCK1<br>PE=1 SV=2 -<br>[HOIL1_HUMAN]                                               | 2.39  | 1 | 1  | 1  | 1   | 0.218 | 0.323 | 0.609 | 0.833 | 1.95   | 2.39  | 1  | 1   | 293  | 32.0  | 8.95 |
| Q9BYM8 | F-actin-capping<br>protein subunit<br>alpha-1<br>OS=Homo<br>sapiens<br>GN=CAPZA1<br>PE=1 SV=3 -<br>[CAZA1_HUMAN]                                                                         | 25.69 | 1 | 12 | 12 | 24  | 1.055 | 1.043 | 1.165 | 0.833 | 47.61  | 25.69 | 19 | 24  | 510  | 57.5  | 5.67 |
| P52907 | Vacuolar<br>protein sorting-<br>associated<br>protein 37A<br>OS=Homo<br>sapiens<br>GN=VPS37A<br>PE=1 SV=1 -<br>[VP37A_HUMAN]                                                             | 58.74 | 1 | 9  | 12 | 201 | 0.831 | 0.802 | 0.890 | 0.833 | 507.24 | 58.74 | 22 | 201 | 286  | 32.9  | 5.69 |
| Q8NEZ2 | Kinesin light<br>chain 2<br>OS=Homo<br>sapiens<br>GN=KLC2 PE=1<br>SV=1 -<br>[KLC2_HUMAN]                                                                                                 | 12.34 | 3 | 5  | 6  | 18  | 0.946 | 0.958 | 1.128 | 0.833 | 36.48  | 12.34 | 10 | 18  | 397  | 44.3  | 5.57 |
| Q9H0B6 | Zinc finger<br>protein 609<br>OS=Homo<br>sapiens<br>GN=ZNF609<br>PE=1 SV=2 -<br>[ZNF609_HUMAN]                                                                                           | 39.55 | 1 | 16 | 23 | 83  | 0.838 | 0.993 | 0.940 | 0.834 | 191.55 | 39.55 | 39 | 83  | 622  | 68.9  | 7.15 |
| O15014 | Exocyst complex<br>component 2<br>OS=Homo<br>sapiens<br>GN=EXOC2<br>PE=1 SV=1 -<br>[EXOC2_HUMAN]                                                                                         | 0.85  | 1 | 1  | 1  | 1   | 1.665 | 0.881 | 0.594 | 0.834 | 0.00   | 0.85  | 1  | 1   | 1411 | 151.1 | 8.03 |
| Q96KP1 |                                                                                                                                                                                          | 17.42 | 1 | 13 | 15 | 37  | 1.121 | 0.840 | 1.004 | 0.834 | 61.64  | 17.42 | 20 | 37  | 924  | 104.0 | 6.90 |

|        |                                                                                                               |       |   |    |    |     |       |       |       |       |        |       |    |     |      |       |      |
|--------|---------------------------------------------------------------------------------------------------------------|-------|---|----|----|-----|-------|-------|-------|-------|--------|-------|----|-----|------|-------|------|
| Q68D51 | DENN domain-containing protein 2C<br>OS=Homo sapiens<br>GN=DENND2C<br>PE=1 SV=2 - [DEN2C_HUMAN]               | 2.26  | 2 | 1  | 2  | 4   | 0.634 | 1.062 | 1.408 | 0.834 | 7.93   | 2.26  | 3  | 4   | 928  | 106.8 | 8.48 |
| Q9NQX7 | Integral membrane protein 2C<br>OS=Homo sapiens<br>GN=ITM2C<br>PE=1 SV=1 - [ITM2C_HUMAN]                      | 14.98 | 1 | 3  | 3  | 17  | 0.691 | 0.826 | 0.963 | 0.834 | 31.23  | 14.98 | 6  | 17  | 267  | 30.2  | 8.00 |
| Q14642 | Type I inositol 1,4,5-trisphosphate 5-phosphatase<br>OS=Homo sapiens<br>GN=INPP5A<br>PE=1 SV=1 - [I5P1_HUMAN] | 13.11 | 1 | 5  | 5  | 15  | 1.061 | 1.391 | 1.122 | 0.834 | 17.32  | 13.11 | 9  | 15  | 412  | 47.8  | 7.03 |
| P54136 | Arginine--tRNA ligase, cytoplasmic<br>OS=Homo sapiens<br>GN=RARS<br>PE=1 SV=2 - [SYRC_HUMAN]                  | 43.64 | 1 | 31 | 31 | 171 | 0.773 | 0.942 | 0.924 | 0.835 | 438.67 | 43.64 | 49 | 171 | 660  | 75.3  | 6.68 |
| Q8IWX8 | Calcium homeostasis endoplasmic reticulum protein<br>OS=Homo sapiens<br>GN=CHERP<br>PE=1 SV=3 - [CHERP_HUMAN] | 7.42  | 1 | 7  | 7  | 23  | 1.005 | 0.860 | 0.755 | 0.835 | 53.59  | 7.42  | 12 | 23  | 916  | 103.6 | 9.04 |
| Q5SRE5 | Nudeoporin NUP188 homolog<br>OS=Homo sapiens<br>GN=NUP188<br>PE=1 SV=1 - [NUP188_HUMAN]                       | 6.23  | 2 | 8  | 9  | 12  | 1.033 | 1.108 | 0.998 | 0.835 | 30.59  | 6.23  | 10 | 12  | 1749 | 195.9 | 6.73 |
| Q9BY89 | Uncharacterized protein KIAA1671<br>OS=Homo sapiens<br>GN=KIAA1671<br>PE=1 SV=2 - [K1671_HUMAN]               | 0.66  | 1 | 1  | 1  | 2   | 1.282 | 1.059 | 0.822 | 0.835 | 4.54   | 0.66  | 1  | 2   | 1806 | 196.6 | 8.47 |
| Q5BJD5 | Transmembrane protein 41B<br>OS=Homo sapiens<br>GN=TMEM41B<br>PE=1 SV=1 - [TM41B_HUMAN]                       | 2.41  | 1 | 1  | 1  | 1   | 0.617 | 0.497 | 0.791 | 0.835 | 1.89   | 2.41  | 1  | 1   | 291  | 32.5  | 9.58 |

|        |                                                                                                                  |       |   |    |    |     |       |       |       |       |         |       |     |     |      |       |      |
|--------|------------------------------------------------------------------------------------------------------------------|-------|---|----|----|-----|-------|-------|-------|-------|---------|-------|-----|-----|------|-------|------|
| Q6I9Y2 | THO complex subunit 7 homolog<br>OS=Homo sapiens<br>GN=THOC7<br>PE=1 SV=3 - [THOC7_HUMAN]                        | 15.69 | 1 | 2  | 3  | 4   | 0.761 | 1.151 | 0.904 | 0.835 | 8.51    | 15.69 | 4   | 4   | 204  | 23.7  | 5.67 |
| Q9H9B1 | Histone-lysine N-methyltransferase EHMT1<br>OS=Homo sapiens<br>GN=EHMT1<br>PE=1 SV=4 - [EHMT1_HUMAN]             | 1.77  | 1 | 1  | 1  | 1   | 1.083 | 1.180 | 1.226 | 0.835 | 0.00    | 1.77  | 1   | 1   | 1298 | 141.4 | 5.76 |
| P46940 | Ras GTPase-activating-like protein IQGAP1<br>OS=Homo sapiens<br>GN=IQGAP1<br>PE=1 SV=1 - [IQGAP1_HUMAN]          | 45.20 | 1 | 75 | 77 | 525 | 1.115 | 1.180 | 1.081 | 0.835 | 1354.42 | 45.20 | 133 | 525 | 1657 | 189.1 | 6.48 |
| Q9BV86 | N-terminal Xaa-Pro-Lys N-methyltransferase 1<br>OS=Homo sapiens<br>GN=NTMT1<br>PE=1 SV=3 - [NTMT1A_HUMAN]        | 34.08 | 1 | 7  | 7  | 26  | 0.794 | 0.952 | 1.093 | 0.835 | 54.40   | 34.08 | 11  | 26  | 223  | 25.4  | 5.52 |
| Q66K74 | Microtubule-associated protein 1S<br>OS=Homo sapiens<br>GN=MAP1S<br>PE=1 SV=2 - [MAP1S_HUMAN]                    | 18.70 | 1 | 16 | 16 | 50  | 0.900 | 1.104 | 1.175 | 0.835 | 120.92  | 18.70 | 21  | 50  | 1059 | 112.1 | 7.30 |
| P16615 | Sarcoplasmic/endoplasmic reticulum calcium ATPase 2<br>OS=Homo sapiens<br>GN=ATP2A2<br>PE=1 SV=1 - [AT2A2_HUMAN] | 35.41 | 2 | 33 | 41 | 328 | 0.877 | 0.902 | 1.038 | 0.835 | 915.23  | 35.41 | 72  | 328 | 1042 | 114.7 | 5.34 |
| P36776 | Lon protease homolog, mitochondrial<br>OS=Homo sapiens<br>GN=LONP1<br>PE=1 SV=2 - [LONM_HUMAN]                   | 33.37 | 2 | 25 | 26 | 124 | 0.803 | 1.097 | 0.861 | 0.835 | 298.79  | 33.37 | 39  | 124 | 959  | 106.4 | 6.39 |
| Q9NZ56 | Formin-2<br>OS=Homo sapiens<br>GN=FMN2<br>PE=1 SV=4 - [FMN2_HUMAN]                                               | 4.12  | 2 | 3  | 7  | 16  | 0.810 | 0.702 | 1.554 | 0.835 | 33.92   | 4.12  | 8   | 16  | 1722 | 180.0 | 5.47 |

|        |                                                                                                                                     |       |   |    |    |     |       |       |       |       |        |       |    |     |      |       |      |
|--------|-------------------------------------------------------------------------------------------------------------------------------------|-------|---|----|----|-----|-------|-------|-------|-------|--------|-------|----|-----|------|-------|------|
| Q5CZC0 | Fibrous sheath-interacting protein 2<br>OS=Homo sapiens<br>GN=FSIP2<br>PE=2 SV=4 - [FSIP2_HUMAN]                                    | 0.78  | 1 | 4  | 5  | 5   | 0.971 | 0.552 | 0.673 | 0.835 | 6.18   | 0.78  | 5  | 5   | 6907 | 780.1 | 6.71 |
| Q16595 | Fra1axin, mitochondrial<br>OS=Homo sapiens<br>GN=FXN PE=1 SV=2 - [FRDA_HUMAN]                                                       | 15.24 | 1 | 4  | 4  | 10  | 0.672 | 0.988 | 1.062 | 0.836 | 13.06  | 15.24 | 6  | 10  | 210  | 23.1  | 8.69 |
| A6NC57 | Ankyrin repeat domain-containing protein 62<br>OS=Homo sapiens<br>GN=ANKRD62<br>PE=2 SV=4 - [ANR62_HUMAN]                           | 1.09  | 1 | 1  | 1  | 1   | 0.882 | 0.888 | 1.023 | 0.836 | 2.65   | 1.09  | 1  | 1   | 917  | 106.4 | 6.67 |
| Q92604 | Acyl-CoA:lyso-phosphatidylglycerol acyltransferase 1<br>OS=Homo sapiens<br>GN=LPGAT1<br>PE=2 SV=1 - [LGAT1_HUMAN]                   | 4.86  | 1 | 2  | 2  | 6   | 1.033 | 0.616 | 0.710 | 0.836 | 12.97  | 4.86  | 3  | 6   | 370  | 43.1  | 8.92 |
| Q9H6W3 | Bifunctional lysine-specific demethylase and histidyl-hydroxylase<br>NO66<br>OS=Homo sapiens<br>GN=NO66<br>PE=1 SV=2 - [NO66_HUMAN] | 10.92 | 1 | 6  | 6  | 11  | 0.959 | 1.090 | 1.078 | 0.836 | 22.95  | 10.92 | 7  | 11  | 641  | 71.0  | 6.46 |
| Q6IBS0 | Twinfilin-2<br>OS=Homo sapiens<br>GN=TWf2<br>PE=1 SV=2 - [TWf2_HUMAN]                                                               | 50.43 | 1 | 12 | 14 | 80  | 0.966 | 1.015 | 1.037 | 0.836 | 262.95 | 50.43 | 22 | 80  | 349  | 39.5  | 6.84 |
| P40261 | Nicotinamide N-methyltransferase<br>OS=Homo sapiens<br>GN=NNMT<br>PE=1 SV=1 - [NNMT_HUMAN]                                          | 25.38 | 1 | 7  | 7  | 109 | 0.906 | 0.585 | 0.770 | 0.836 | 351.74 | 25.38 | 13 | 109 | 264  | 29.6  | 5.74 |
| Q9NVJ2 | ADP-ribosylation factor-like protein 8B<br>OS=Homo sapiens<br>GN=ARL8B<br>PE=1 SV=1 - [ARL8B_HUMAN]                                 | 34.41 | 1 | 2  | 6  | 16  | 1.172 | 0.933 | 0.746 | 0.836 | 35.60  | 34.41 | 9  | 16  | 186  | 21.5  | 8.43 |

|        |                                                                                                                                 |       |   |    |    |      |       |       |       |       |         |       |    |      |     |      |      |
|--------|---------------------------------------------------------------------------------------------------------------------------------|-------|---|----|----|------|-------|-------|-------|-------|---------|-------|----|------|-----|------|------|
| P14923 | Junction<br>plakoglobin<br>OS=Homo<br>sapiens<br>GN=JUP PE=1<br>SV=3 -<br>[PLAK_HUMAN]                                          | 17.32 | 1 | 8  | 11 | 32   | 2.459 | 1.649 | 1.563 | 0.836 | 78.07   | 17.32 | 17 | 32   | 745 | 81.7 | 6.14 |
| Q9Y450 | HBS1-like<br>protein<br>OS=Homo<br>sapiens<br>GN=HBS1L<br>PE=1 SV=1 -<br>[HBS1L_HUMAN<br>]                                      | 32.60 | 1 | 17 | 17 | 51   | 0.764 | 1.043 | 1.042 | 0.836 | 118.20  | 32.60 | 26 | 51   | 684 | 75.4 | 6.61 |
| P61758 | Prefoldin<br>subunit 3<br>OS=Homo<br>sapiens<br>GN=VBP1<br>PE=1 SV=3 -<br>[PFD3_HUMAN]                                          | 61.42 | 1 | 12 | 13 | 76   | 0.822 | 0.957 | 0.786 | 0.836 | 199.52  | 61.42 | 21 | 76   | 197 | 22.6 | 7.11 |
| Q12962 | Transcription<br>initiation factor<br>TFIID subunit<br>10 OS=Homo<br>sapiens<br>GN=TAF10<br>PE=1 SV=1 -<br>[TAF10_HUMAN<br>]    | 15.14 | 1 | 2  | 2  | 5    | 0.637 | 0.867 | 0.639 | 0.836 | 17.54   | 15.14 | 3  | 5    | 218 | 21.7 | 6.57 |
| Q9NYL9 | Tropomodulin-<br>3 OS=Homo<br>sapiens<br>GN=TMOD3<br>PE=1 SV=1 -<br>[TMOD3_HUMA<br>N]                                           | 58.81 | 1 | 15 | 17 | 87   | 1.171 | 0.957 | 0.895 | 0.837 | 211.41  | 58.81 | 28 | 87   | 352 | 39.6 | 5.19 |
| P25098 | Beta-<br>adrenergic<br>receptor kinase<br>1 OS=Homo<br>sapiens<br>GN=ADRBK1<br>PE=1 SV=2 -<br>[ARBK1_HUMAN]                     | 5.66  | 1 | 3  | 4  | 5    | 1.055 | 0.987 | 1.093 | 0.837 | 8.65    | 5.66  | 5  | 5    | 689 | 79.5 | 7.28 |
| P04406 | Glyceraldehyde-<br>3-phosphate<br>dehydrogenase<br>OS=Homo<br>sapiens<br>GN=GAPDH<br>PE=1 SV=3 -<br>[G3P_HUMAN]                 | 86.87 | 1 | 34 | 34 | 2249 | 1.147 | 1.037 | 1.073 | 0.837 | 5688.32 | 86.87 | 56 | 2249 | 335 | 36.0 | 8.46 |
| P05198 | Eukaryotic<br>translation<br>initiation factor<br>2 subunit 1<br>OS=Homo<br>sapiens<br>GN=EIF2S1<br>PE=1 SV=3 -<br>[IF2A_HUMAN] | 65.40 | 1 | 24 | 25 | 120  | 0.851 | 0.854 | 0.900 | 0.837 | 298.99  | 65.40 | 40 | 120  | 315 | 36.1 | 5.08 |
| O14653 | Golgi SNAP<br>receptor<br>complex<br>member 2<br>OS=Homo<br>sapiens<br>GN=GOSR2<br>PE=1 SV=2 -<br>[GOSR2_HUMA<br>N]             | 25.94 | 1 | 4  | 5  | 12   | 0.870 | 0.932 | 0.918 | 0.837 | 34.37   | 25.94 | 6  | 12   | 212 | 24.8 | 8.06 |

|        |                                                                                                                     |       |   |    |    |     |       |       |       |       |        |       |    |     |      |       |      |
|--------|---------------------------------------------------------------------------------------------------------------------|-------|---|----|----|-----|-------|-------|-------|-------|--------|-------|----|-----|------|-------|------|
| P49721 | Proteasome subunit beta type-2<br>OS=Homo sapiens<br>GN=PSMB2<br>PE=1 SV=1 - [PSB2_HUMAN]                           | 69.15 | 1 | 13 | 14 | 75  | 0.872 | 0.814 | 0.877 | 0.837 | 160.07 | 69.15 | 23 | 75  | 201  | 22.8  | 7.02 |
| Q96KQ4 | Apoptosis-stimulating of p53 protein 1<br>OS=Homo sapiens<br>GN=PPP1R13B<br>PE=1 SV=3 - [ASPP1_HUMAN]               | 1.10  | 1 | 1  | 1  | 1   | 0.693 | 1.979 | 2.250 | 0.837 | 3.40   | 1.10  | 1  | 1   | 1090 | 119.5 | 6.76 |
| P00492 | Hypoxanthine-guanine phosphoribosyltransferase<br>OS=Homo sapiens<br>GN=HPRT1<br>PE=1 SV=2 - [HPRT_HUMAN]           | 52.75 | 1 | 8  | 8  | 36  | 1.232 | 0.922 | 0.919 | 0.837 | 83.57  | 52.75 | 14 | 36  | 218  | 24.6  | 6.68 |
| Q8NEY8 | Periphrin-1<br>OS=Homo sapiens<br>GN=PPHLN1<br>PE=1 SV=2 - [PPHLN_HUMAN]                                            | 4.37  | 1 | 2  | 2  | 2   | 1.053 | 1.016 | 0.858 | 0.837 | 1.84   | 4.37  | 2  | 2   | 458  | 52.7  | 9.11 |
| O94973 | AP-2 complex subunit alpha-2<br>OS=Homo sapiens<br>GN=AP2A2<br>PE=1 SV=2 - [AP2A2_HUMAN]                            | 30.35 | 1 | 15 | 27 | 117 | 0.965 | 0.854 | 0.888 | 0.837 | 280.22 | 30.35 | 44 | 117 | 939  | 103.9 | 6.96 |
| Q9H4G0 | Band 4.1-like protein 1<br>OS=Homo sapiens<br>GN=EPB41L1<br>PE=1 SV=2 - [E41L1_HUMAN]                               | 13.62 | 1 | 7  | 9  | 18  | 0.697 | 0.623 | 0.849 | 0.838 | 30.48  | 13.62 | 11 | 18  | 881  | 98.4  | 5.62 |
| Q6GMV3 | Putative peptidyl-tRNA hydrolase<br>PTRHD1<br>OS=Homo sapiens<br>GN=PTRHD1<br>PE=1 SV=1 - [PTRD1_HUMAN]             | 31.43 | 1 | 5  | 5  | 18  | 0.945 | 0.958 | 0.790 | 0.838 | 53.61  | 31.43 | 8  | 18  | 140  | 15.8  | 9.10 |
| Q9Y4P8 | WD repeat domain phosphoinositide-interacting protein 2<br>OS=Homo sapiens<br>GN=WIP12<br>PE=1 SV=1 - [WIP12_HUMAN] | 8.81  | 1 | 3  | 4  | 5   | 1.097 | 1.173 | 1.819 | 0.838 | 14.56  | 8.81  | 5  | 5   | 454  | 49.4  | 6.46 |
| P84085 | ADP-ribosylation factor 5<br>OS=Homo sapiens<br>GN=ARF5<br>PE=1 SV=2 - [ARF5_HUMAN]                                 | 44.44 | 2 | 3  | 8  | 105 | 0.750 | 0.925 | 0.702 | 0.838 | 181.17 | 44.44 | 15 | 105 | 180  | 20.5  | 6.79 |

|        |                                                                                                                                   |       |   |    |    |    |       |       |       |       |        |       |    |    |     |      |      |
|--------|-----------------------------------------------------------------------------------------------------------------------------------|-------|---|----|----|----|-------|-------|-------|-------|--------|-------|----|----|-----|------|------|
| Q9UHK6 | Alpha-methylacyl-CoA racemase<br>OS=Homo sapiens<br>GN=AMACR<br>PE=1 SV=2 - [AMACR_HUMAN]                                         | 2.62  | 1 | 1  | 1  | 4  | 1.579 | 1.276 | 1.195 | 0.838 | 6.27   | 2.62  | 2  | 4  | 382 | 42.4 | 6.44 |
| O75663 | TIP41-like protein<br>OS=Homo sapiens<br>GN=TIPRL<br>PE=1 SV=2 - [TIPRL_HUMAN]                                                    | 45.59 | 1 | 11 | 11 | 36 | 0.814 | 0.986 | 1.025 | 0.838 | 100.40 | 45.59 | 16 | 36 | 272 | 31.4 | 5.91 |
| Q9UKM7 | Endoplasmic reticulum mannosyl-oligosaccharide 1,2-alpha-mannosidase<br>OS=Homo sapiens<br>GN=MAN1B1<br>PE=1 SV=2 - [MA1B1_HUMAN] | 16.74 | 1 | 9  | 9  | 41 | 0.895 | 0.728 | 0.615 | 0.838 | 69.63  | 16.74 | 14 | 41 | 699 | 79.5 | 7.72 |
| Q9Y3C6 | Peptidyl-prolyl cis-trans isomerase-like 1<br>OS=Homo sapiens<br>GN=PPIL1<br>PE=1 SV=1 - [PPIL1_HUMAN]                            | 31.93 | 1 | 5  | 5  | 34 | 1.180 | 0.998 | 0.951 | 0.838 | 64.24  | 31.93 | 9  | 34 | 166 | 18.2 | 7.99 |
| Q15404 | Ras suppressor protein 1<br>OS=Homo sapiens<br>GN=RSU1<br>PE=1 SV=3 - [RSU1_HUMAN]                                                | 43.68 | 1 | 14 | 14 | 74 | 0.967 | 1.043 | 1.210 | 0.838 | 163.18 | 43.68 | 23 | 74 | 277 | 31.5 | 8.65 |
| Q06828 | Fibromodulin<br>OS=Homo sapiens<br>GN=FMOD<br>PE=1 SV=2 - [FMOD_HUMAN]                                                            | 2.93  | 1 | 1  | 1  | 2  | 0.667 | 0.795 | 0.649 | 0.838 | 7.38   | 2.93  | 2  | 2  | 376 | 43.2 | 6.04 |
| Q8N4U5 | T-complex protein 11-like protein 2<br>OS=Homo sapiens<br>GN=TCP11L2<br>PE=2 SV=1 - [T11L2_HUMAN]                                 | 4.82  | 1 | 1  | 2  | 4  | 0.700 | 0.986 | 0.972 | 0.838 | 10.09  | 4.82  | 2  | 4  | 519 | 58.1 | 4.96 |
| Q92830 | Histone acetyltransferase KAT2A<br>OS=Homo sapiens<br>GN=KAT2A<br>PE=1 SV=3 - [KAT2A_HUMAN]                                       | 4.78  | 1 | 2  | 4  | 5  | 0.790 | 1.239 | 1.328 | 0.838 | 2.25   | 4.78  | 4  | 5  | 837 | 93.9 | 9.04 |
| A1L0T0 | Acetolactate synthase-like protein<br>OS=Homo sapiens<br>GN=ILVBL<br>PE=1 SV=2 - [ILVBL_HUMAN]                                    | 12.97 | 1 | 7  | 7  | 20 | 0.996 | 0.850 | 0.862 | 0.838 | 47.34  | 12.97 | 11 | 20 | 632 | 67.8 | 8.15 |



|        |                                                                                                                                  |       |   |    |    |     |       |       |       |       |        |       |     |     |      |       |      |
|--------|----------------------------------------------------------------------------------------------------------------------------------|-------|---|----|----|-----|-------|-------|-------|-------|--------|-------|-----|-----|------|-------|------|
| Q86X55 | Histone-arginine methyltransferase CARM1<br>OS=Homo sapiens<br>GN=CARM1<br>PE=1 SV=3 - [CARM1_HUMAN]                             | 12.50 | 1 | 6  | 6  | 25  | 0.797 | 0.803 | 0.974 | 0.838 | 47.50  | 12.50 | 9   | 25  | 608  | 65.8  | 6.73 |
| P07195 | L-lactate dehydrogenase B chain<br>OS=Homo sapiens<br>GN=LDHB PE=1 SV=2 - [LDHB_HUMAN]                                           | 53.59 | 2 | 19 | 21 | 401 | 0.877 | 0.888 | 0.879 | 0.838 | 946.17 | 53.59 | 36  | 401 | 334  | 36.6  | 6.05 |
| Q9BY11 | Protein kinase C and casein kinase substrate in neurons protein 1<br>OS=Homo sapiens<br>GN=PACSIN1<br>PE=1 SV=1 - [PACIN1_HUMAN] | 8.11  | 1 | 2  | 5  | 17  | 1.903 | 1.279 | 1.054 | 0.839 | 21.80  | 8.11  | 7   | 17  | 444  | 50.9  | 5.24 |
| Q5T7N2 | LINE-1 type transposase domain-containing protein 1<br>OS=Homo sapiens<br>GN=LITD1<br>PE=1 SV=1 - [LITD1_HUMAN]                  | 2.08  | 1 | 1  | 1  | 1   | 0.703 | 0.554 | 0.770 | 0.839 | 0.00   | 2.08  | 1   | 1   | 865  | 98.8  | 4.93 |
| O95835 | Serine/threonine-protein kinase LATS1<br>OS=Homo sapiens<br>GN=LATS1<br>PE=1 SV=1 - [LATS1_HUMAN]                                | 3.54  | 1 | 3  | 4  | 4   | 0.860 | 0.755 | 1.245 | 0.839 | 8.30   | 3.54  | 4   | 4   | 1130 | 126.8 | 8.70 |
| Q07954 | Prolow-density lipoprotein receptor-related protein 1<br>OS=Homo sapiens<br>GN=LRP1 PE=1 SV=2 - [LRP1_HUMAN]                     | 21.17 | 1 | 83 | 83 | 332 | 0.810 | 0.875 | 0.829 | 0.839 | 874.48 | 21.17 | 139 | 332 | 4544 | 504.3 | 5.39 |
| O75362 | Zinc finger protein 217<br>OS=Homo sapiens<br>GN=ZNF217<br>PE=1 SV=1 - [ZNF217_HUMAN]                                            | 2.48  | 1 | 2  | 2  | 4   | 0.743 | 0.656 | 0.621 | 0.839 | 12.80  | 2.48  | 2   | 4   | 1048 | 115.2 | 8.48 |
| P12955 | Xaa-Pro dipeptidase<br>OS=Homo sapiens<br>GN=PEPD<br>PE=1 SV=3 - [PEPD_HUMAN]                                                    | 40.16 | 1 | 15 | 15 | 45  | 0.781 | 0.932 | 0.901 | 0.839 | 134.46 | 40.16 | 23  | 45  | 493  | 54.5  | 6.00 |

|        |                                                                                                                       |       |   |    |    |    |       |       |       |       |        |       |    |    |      |       |      |
|--------|-----------------------------------------------------------------------------------------------------------------------|-------|---|----|----|----|-------|-------|-------|-------|--------|-------|----|----|------|-------|------|
| P48730 | Casein kinase I isoform delta<br>OS=Homo sapiens<br>GN=CSNK1D<br>PE=1 SV=2 - [KC1D_HUMAN]                             | 15.90 | 1 | 2  | 6  | 14 | 0.811 | 1.024 | 1.027 | 0.839 | 31.79  | 15.90 | 8  | 14 | 415  | 47.3  | 9.74 |
| Q96Q05 | Trafficking protein particle complex subunit 9<br>OS=Homo sapiens<br>GN=TRAPPC9<br>PE=1 SV=2 - [TPPC9_HUMAN]          | 5.05  | 1 | 5  | 5  | 7  | 1.044 | 0.890 | 1.041 | 0.840 | 8.37   | 5.05  | 7  | 7  | 1148 | 128.4 | 6.62 |
| Q9BQR3 | Serine protease 27<br>OS=Homo sapiens<br>GN=PRSS27<br>PE=1 SV=1 - [PRS27_HUMAN]                                       | 4.14  | 1 | 1  | 1  | 1  | 0.621 | 0.770 | 0.550 | 0.840 | 2.01   | 4.14  | 1  | 1  | 290  | 31.9  | 8.13 |
| Q9BUW7 | UPF0184 protein C9orf16<br>OS=Homo sapiens<br>GN=C9orf16<br>PE=1 SV=1 - [C1016_HUMAN]                                 | 10.84 | 1 | 1  | 1  | 2  | 0.544 | 0.793 | 1.232 | 0.840 | 3.05   | 10.84 | 2  | 2  | 83   | 9.0   | 4.22 |
| Q8IWB1 | Inositol 1,4,5-trisphosphate receptor-interacting protein<br>OS=Homo sapiens<br>GN=ITPRIP<br>PE=1 SV=1 - [IPRI_HUMAN] | 13.89 | 1 | 6  | 7  | 30 | 0.884 | 0.890 | 1.009 | 0.840 | 54.49  | 13.89 | 11 | 30 | 547  | 62.0  | 5.88 |
| Q9Y6X6 | Unconventional myosin-XVI<br>OS=Homo sapiens<br>GN=MYO16<br>PE=1 SV=3 - [MYO16_HUMAN]                                 | 1.02  | 1 | 1  | 1  | 1  | 0.869 | 0.590 | 0.729 | 0.840 | 0.00   | 1.02  | 1  | 1  | 1858 | 206.0 | 6.81 |
| Q15386 | Ubiquitin-protein ligase E3C<br>OS=Homo sapiens<br>GN=UBE3C<br>PE=1 SV=3 - [UBE3C_HUMAN]                              | 16.16 | 1 | 12 | 13 | 33 | 0.847 | 0.662 | 0.963 | 0.840 | 85.54  | 16.16 | 19 | 33 | 1083 | 123.8 | 6.71 |
| Q15436 | Protein transport protein Sec23A<br>OS=Homo sapiens<br>GN=SEC23A<br>PE=1 SV=2 - [SC23A_HUMAN]                         | 24.71 | 1 | 18 | 19 | 99 | 0.840 | 0.876 | 0.966 | 0.840 | 254.68 | 24.71 | 32 | 99 | 765  | 86.1  | 7.08 |
| Q99707 | Methionine synthase<br>OS=Homo sapiens<br>GN=MTR PE=1 SV=2 - [METH_HUMAN]                                             | 4.11  | 1 | 5  | 5  | 13 | 0.694 | 0.783 | 0.857 | 0.840 | 25.82  | 4.11  | 8  | 13 | 1265 | 140.4 | 5.58 |

|        |                                                                                                                     |       |   |    |    |     |       |       |       |       |         |       |    |     |     |       |      |
|--------|---------------------------------------------------------------------------------------------------------------------|-------|---|----|----|-----|-------|-------|-------|-------|---------|-------|----|-----|-----|-------|------|
| P31751 | RAC-beta<br>serine/threonin<br>e-protein<br>kinase<br>OS=Homo<br>sapiens<br>GN=AKT2<br>PE=1 SV=2 -<br>[AKT2_HUMAN]  | 24.95 | 2 | 8  | 11 | 25  | 0.994 | 0.913 | 1.010 | 0.840 | 48.87   | 24.95 | 15 | 25  | 481 | 55.7  | 6.37 |
| Q8WUA7 | TBC1 domain<br>family member<br>22A OS=Homo<br>sapiens<br>GN=TBC1D22A<br>PE=1 SV=2 -<br>[TB22A_HUMAN<br>]           | 3.09  | 1 | 1  | 2  | 4   | 0.970 | 0.819 | 1.191 | 0.840 | 10.76   | 3.09  | 2  | 4   | 517 | 59.1  | 5.97 |
| O95782 | AP-2 complex<br>subunit alpha-<br>1 OS=Homo<br>sapiens<br>GN=AP2A1<br>PE=1 SV=3 -<br>[AP2A1_HUMAN<br>]              | 44.93 | 1 | 25 | 37 | 206 | 0.933 | 0.747 | 0.877 | 0.840 | 476.81  | 44.93 | 61 | 206 | 977 | 107.5 | 7.03 |
| P62253 | Ubiquitin-<br>conjugating<br>enzyme E2 G1<br>OS=Homo<br>sapiens<br>GN=UBE2G1<br>PE=1 SV=3 -<br>[UB2G1_HUMAN<br>]    | 18.24 | 1 | 4  | 4  | 9   | 0.474 | 0.889 | 0.742 | 0.840 | 12.72   | 18.24 | 7  | 9   | 170 | 19.5  | 5.30 |
| P17931 | Galectin-3<br>OS=Homo<br>sapiens<br>GN=LGALS3<br>PE=1 SV=5 -<br>[LEG3_HUMAN]                                        | 32.40 | 1 | 10 | 11 | 223 | 0.855 | 1.199 | 1.159 | 0.840 | 486.40  | 32.40 | 20 | 223 | 250 | 26.1  | 8.56 |
| O95816 | BAG family<br>molecular<br>chaperone<br>regulator 2<br>OS=Homo<br>sapiens<br>GN=BAG2<br>PE=1 SV=1 -<br>[BAG2_HUMAN] | 60.19 | 1 | 13 | 13 | 102 | 0.637 | 1.223 | 0.776 | 0.840 | 225.72  | 60.19 | 23 | 102 | 211 | 23.8  | 6.70 |
| P13807 | Glycogen<br>[starch]<br>synthase,<br>muscle<br>OS=Homo<br>sapiens<br>GN=GYS1<br>PE=1 SV=2 -<br>[GYS1_HUMAN]         | 21.98 | 1 | 13 | 15 | 54  | 0.754 | 1.002 | 0.923 | 0.840 | 164.70  | 21.98 | 21 | 54  | 737 | 83.7  | 6.18 |
| P36639 | 7,8-dihydro-8-<br>oxoguanine<br>triphosphatase<br>OS=Homo<br>sapiens<br>GN=NUDT1<br>PE=1 SV=3 -<br>[8ODP_HUMAN]     | 21.32 | 1 | 5  | 5  | 7   | 1.129 | 1.215 | 0.866 | 0.840 | 21.93   | 21.32 | 6  | 7   | 197 | 22.5  | 5.27 |
| Q16555 | Dihydropyrimidi<br>nase-related<br>protein 2<br>OS=Homo<br>sapiens<br>GN=DPYSL2<br>PE=1 SV=1 -<br>[DPYL2_HUMAN<br>] | 63.11 | 1 | 23 | 28 | 617 | 1.157 | 1.001 | 0.841 | 0.841 | 1665.56 | 63.11 | 49 | 617 | 572 | 62.3  | 6.38 |

|        |                                                                                                                                                                                                                   |       |   |    |    |     |       |       |       |       |        |       |    |     |      |       |      |
|--------|-------------------------------------------------------------------------------------------------------------------------------------------------------------------------------------------------------------------|-------|---|----|----|-----|-------|-------|-------|-------|--------|-------|----|-----|------|-------|------|
| P26639 | Threonine--<br>tRNA ligase,<br>cytoplasmic<br>OS=Homo<br>sapiens<br>GN=TARS<br>PE=1 SV=3 -<br>[SYTC_HUMAN]                                                                                                        | 45.50 | 1 | 25 | 29 | 146 | 0.921 | 0.735 | 0.764 | 0.841 | 352.28 | 45.50 | 49 | 146 | 723  | 83.4  | 6.67 |
| Q9BSU1 | UPF0183<br>protein<br>C16orf70<br>OS=Homo<br>sapiens<br>GN=C16orf70<br>PE=1 SV=1 -<br>[CP070_HUMAN<br>]                                                                                                           | 2.37  | 1 | 1  | 1  | 2   | 1.170 | 0.931 | 0.920 | 0.841 | 5.15   | 2.37  | 2  | 2   | 422  | 47.5  | 7.72 |
| P24468 | COUP<br>transcription<br>factor 2<br>OS=Homo<br>sapiens<br>GN=NR2F2<br>PE=1 SV=1 -<br>[COT2_HUMAN]                                                                                                                | 4.11  | 3 | 2  | 2  | 2   | 0.844 | 1.620 | 1.410 | 0.841 | 2.32   | 4.11  | 2  | 2   | 414  | 45.5  | 8.28 |
| P0CW18 | Serine<br>protease 56<br>OS=Homo<br>sapiens<br>GN=PRSS56<br>PE=1 SV=1 -<br>[PRS56_HUMAN]                                                                                                                          | 2.32  | 1 | 1  | 1  | 1   | 1.089 | 1.525 | 0.925 | 0.841 | 0.00   | 2.32  | 1  | 1   | 603  | 64.6  | 8.76 |
| Q8WVK7 | Spindle and<br>kinetochore-<br>associated<br>protein 2<br>OS=Homo<br>sapiens<br>GN=SKA2<br>PE=1 SV=1 -<br>[SKA2_HUMAN]                                                                                            | 13.22 | 1 | 1  | 1  | 3   | 0.770 | 0.889 | 0.596 | 0.841 | 0.00   | 13.22 | 1  | 3   | 121  | 14.2  | 7.33 |
| P07996 | Thrombospondi<br>n-1 OS=Homo<br>sapiens<br>GN=THBS1<br>PE=1 SV=2 -<br>[TSP1_HUMAN]                                                                                                                                | 34.96 | 1 | 35 | 37 | 226 | 0.372 | 0.643 | 0.805 | 0.841 | 550.99 | 34.96 | 61 | 226 | 1170 | 129.3 | 4.94 |
| Q3LFD5 | Putative<br>ubiquitin<br>carboxyl-<br>terminal<br>hydrolase 41<br>OS=Homo<br>sapiens<br>GN=USP41<br>PE=2 SV=2 -<br>[UBP41_HUMAN<br>]                                                                              | 3.07  | 2 | 1  | 1  | 1   | 0.808 | 1.203 | 0.965 | 0.841 | 2.01   | 3.07  | 1  | 1   | 358  | 41.4  | 8.03 |
| O60218 | Aldo-keto<br>reductase<br>family 1<br>member B10<br>OS=Homo<br>sapiens<br>GN=AKR1B10<br>PE=1 SV=2 -<br>[AK1BA_HUMAN<br>Protein<br>FAM195B<br>OS=Homo<br>sapiens<br>GN=FAM195B<br>PE=1 SV=1 -<br>[F195B_HUMAN<br>] | 21.52 | 1 | 7  | 7  | 16  | 0.871 | 0.438 | 1.333 | 0.841 | 29.59  | 21.52 | 9  | 16  | 316  | 36.0  | 7.84 |
| C9JLW8 | Protein<br>FAM195B<br>OS=Homo<br>sapiens<br>GN=FAM195B<br>PE=1 SV=1 -<br>[F195B_HUMAN<br>]                                                                                                                        | 64.95 | 1 | 7  | 7  | 12  | 1.038 | 0.989 | 0.909 | 0.841 | 24.05  | 64.95 | 10 | 12  | 97   | 10.9  | 9.41 |

|        |                                                                                                                                     |       |   |    |    |    |       |       |       |       |        |       |    |    |      |       |      |
|--------|-------------------------------------------------------------------------------------------------------------------------------------|-------|---|----|----|----|-------|-------|-------|-------|--------|-------|----|----|------|-------|------|
| Q5JX69 | Protein<br>FAM209B<br>OS=Homo<br>sapiens<br>GN=FAM209B<br>PE=2 SV=1 -<br>[F209B_HUMAN<br>]<br>N-alpha-<br>acetyltransfera<br>se 11  | 7.02  | 1 | 1  | 1  | 1  | 1.287 | 0.703 | 0.834 | 0.841 | 2.05   | 7.02  | 1  | 1  | 171  | 19.5  | 8.84 |
| Q9BSU3 | OS=Homo<br>sapiens<br>GN=NAA11<br>PE=1 SV=3 -<br>[NAA11_HUMAN<br>NTPase KAP<br>family P-loop<br>domain-<br>containing<br>protein 1  | 13.54 | 1 | 1  | 3  | 6  | 1.048 | 1.640 | 5.359 | 0.841 | 22.77  | 13.54 | 3  | 6  | 229  | 26.0  | 5.17 |
| Q17RQ9 | OS=Homo<br>sapiens<br>GN=NKPD1<br>PE=2 SV=1 -<br>[NKPD1_HUMAN<br>]<br>WD repeat-<br>containing<br>protein 44                        | 2.79  | 1 | 1  | 1  | 1  |       |       | 1.259 | 0.841 | 2.74   | 2.79  | 1  | 1  | 610  | 67.7  | 8.85 |
| Q5JSH3 | OS=Homo<br>sapiens<br>GN=WDR44<br>PE=1 SV=1 -<br>[WDR44_HUMA<br>N]<br>5'-AMP-<br>activated<br>protein kinase<br>subunit gamma-<br>1 | 20.70 | 1 | 16 | 16 | 36 | 0.995 | 1.151 | 1.252 | 0.841 | 108.17 | 20.70 | 20 | 36 | 913  | 101.3 | 5.45 |
| P54619 | OS=Homo<br>sapiens<br>GN=PRKAG1<br>PE=1 SV=1 -<br>[AAKG1_HUMAN<br>]<br>Fatty acid<br>desaturase 3                                   | 11.48 | 1 | 2  | 4  | 16 | 1.075 | 0.922 | 0.909 | 0.841 | 33.67  | 11.48 | 7  | 16 | 331  | 37.6  | 6.92 |
| Q9Y5Q0 | OS=Homo<br>sapiens<br>GN=FADS3<br>PE=2 SV=1 -<br>[FADS3_HUMAN<br>]<br>Membrane<br>magnesium<br>transporter 1                        | 4.72  | 1 | 2  | 2  | 2  | 0.645 | 0.708 | 1.303 | 0.841 | 6.20   | 4.72  | 2  | 2  | 445  | 51.1  | 7.77 |
| Q8N4V1 | OS=Homo<br>sapiens<br>GN=MMGT1<br>PE=1 SV=1 -<br>[MMGT1_HUMA<br>N]<br>Protein-<br>methionine<br>sulfoxide<br>oxidase MICAL1         | 18.32 | 1 | 1  | 1  | 12 | 0.790 | 1.041 | 0.862 | 0.842 | 18.31  | 18.32 | 2  | 12 | 131  | 14.7  | 9.16 |
| Q8TDZ2 | OS=Homo<br>sapiens<br>GN=MICAL1<br>PE=1 SV=2 -<br>[MICAL1_HUMAN<br>]                                                                | 17.34 | 1 | 18 | 18 | 63 | 0.886 | 1.037 | 1.310 | 0.842 | 123.56 | 17.34 | 30 | 63 | 1067 | 117.8 | 6.40 |

|        |                                                                                                                                                                                |       |   |    |    |    |       |       |       |       |       |       |    |    |      |       |      |
|--------|--------------------------------------------------------------------------------------------------------------------------------------------------------------------------------|-------|---|----|----|----|-------|-------|-------|-------|-------|-------|----|----|------|-------|------|
| Q9NWT1 | p21-activated protein kinase-interacting protein 1<br>OS=Homo sapiens<br>GN=PAK1IP1<br>PE=1 SV=2 - [PK1IP_HUMAN]<br>Trafficking protein partide complex subunit 2-like protein | 2.30  | 1 | 1  | 1  | 1  | 0.917 | 0.806 | 0.860 | 0.842 | 2.28  | 2.30  | 1  | 1  | 392  | 43.9  | 8.91 |
| Q9UL33 | OS=Homo sapiens<br>GN=TRAPPC2L<br>PE=1 SV=1 - [TPC2L_HUMAN]<br>Trafficking protein partide complex subunit 5                                                                   | 12.14 | 1 | 2  | 2  | 9  | 1.141 | 1.258 | 1.080 | 0.842 | 19.85 | 12.14 | 2  | 9  | 140  | 16.1  | 6.77 |
| Q8IUR0 | OS=Homo sapiens<br>GN=TRAPPC5<br>PE=1 SV=1 - [TPPCS_HUMAN]<br>Upstream-binding protein 1                                                                                       | 19.68 | 1 | 3  | 4  | 13 | 0.713 | 0.834 | 0.927 | 0.842 | 25.92 | 19.68 | 6  | 13 | 188  | 20.8  | 9.66 |
| Q9NZI7 | OS=Homo sapiens<br>GN=UBP1<br>PE=2 SV=1 - [UBIP1_HUMAN]<br>Carboxypeptidase Q                                                                                                  | 8.70  | 1 | 2  | 3  | 10 | 0.624 | 0.965 | 0.893 | 0.842 | 35.67 | 8.70  | 4  | 10 | 540  | 60.5  | 6.35 |
| Q9Y646 | OS=Homo sapiens<br>GN=CPQ PE=1 SV=1 - [CBPQ_HUMAN]<br>Xin actin-binding repeat-containing protein 2                                                                            | 22.25 | 2 | 9  | 9  | 28 | 0.808 | 0.905 | 1.075 | 0.842 | 70.60 | 22.25 | 12 | 28 | 472  | 51.9  | 6.18 |
| A4UGR9 | OS=Homo sapiens<br>GN=XIRP2<br>PE=1 SV=2 - [XIRP2_HUMAN]<br>Leucyl-cystinyl aminopeptidase                                                                                     | 1.16  | 1 | 4  | 4  | 4  | 0.921 | 0.627 | 0.625 | 0.843 | 7.67  | 1.16  | 4  | 4  | 3374 | 382.1 | 6.38 |
| Q9UIQ6 | OS=Homo sapiens<br>GN=LNPEP<br>PE=1 SV=3 - [LCAP_HUMAN]<br>Stromal interaction molecule 2                                                                                      | 12.78 | 1 | 12 | 12 | 19 | 1.123 | 0.832 | 0.924 | 0.843 | 36.89 | 12.78 | 16 | 19 | 1025 | 117.3 | 5.73 |
| Q9P246 | OS=Homo sapiens<br>GN=STIM2<br>PE=1 SV=2 - [STIM2_HUMAN]                                                                                                                       | 8.98  | 1 | 5  | 6  | 12 | 1.681 | 0.901 | 0.876 | 0.843 | 36.36 | 8.98  | 6  | 12 | 746  | 83.9  | 6.76 |

|        |                                                                                                                     |       |   |   |   |    |       |       |       |       |       |       |    |    |     |       |      |
|--------|---------------------------------------------------------------------------------------------------------------------|-------|---|---|---|----|-------|-------|-------|-------|-------|-------|----|----|-----|-------|------|
| Q86TN4 | tRNA 2'-phosphotransferase 1<br>OS=Homo sapiens<br>GN=TRPT1<br>PE=1 SV=2 - [TRPT1_HUMAN]                            | 11.86 | 1 | 3 | 3 | 8  | 1.153 | 1.187 | 1.173 | 0.843 | 15.00 | 11.86 | 5  | 8  | 253 | 27.7  | 9.98 |
| Q8IWB7 | WD repeat and FYVE domain-containing protein 1<br>OS=Homo sapiens<br>GN=WDFY1<br>PE=1 SV=1 - [WDFY1_HUMAN]          | 11.22 | 1 | 4 | 4 | 8  | 1.007 | 0.673 | 0.576 | 0.843 | 18.68 | 11.22 | 6  | 8  | 410 | 46.3  | 7.33 |
| Q13505 | Metaxin-1<br>OS=Homo sapiens<br>GN=MTX1<br>PE=1 SV=2 - [MTX1_HUMAN]                                                 | 10.73 | 1 | 4 | 4 | 12 | 0.656 | 0.718 | 0.455 | 0.843 | 33.36 | 10.73 | 6  | 12 | 466 | 51.4  | 9.79 |
| P14324 | Farnesyl pyrophosphate synthase<br>OS=Homo sapiens<br>GN=FDPS<br>PE=1 SV=4 - [FPPS_HUMAN]                           | 13.37 | 1 | 5 | 5 | 26 | 1.146 | 0.719 | 1.238 | 0.843 | 58.09 | 13.37 | 9  | 26 | 419 | 48.2  | 6.15 |
| P61421 | V-type proton ATPase subunit d 1<br>OS=Homo sapiens<br>GN=ATP6V0D1<br>PE=1 SV=1 - [VA0D1_HUMAN]                     | 17.66 | 1 | 7 | 7 | 28 | 0.959 | 0.716 | 0.655 | 0.843 | 70.00 | 17.66 | 13 | 28 | 351 | 40.3  | 5.00 |
| Q61CL3 | Transport and Golgi organization protein 2 homolog<br>OS=Homo sapiens<br>GN=TANGO2<br>PE=2 SV=1 - [TNG2_HUMAN]      | 5.43  | 1 | 2 | 2 | 3  | 0.706 | 1.156 | 1.282 | 0.843 | 5.18  | 5.43  | 3  | 3  | 276 | 30.9  | 5.17 |
| A6NIV6 | Leucine-rich repeat and IQ domain-containing protein 4<br>OS=Homo sapiens<br>GN=LRR1Q4<br>PE=2 SV=2 - [LRIQ4_HUMAN] | 3.93  | 1 | 1 | 2 | 2  | 0.554 | 1.740 | 1.053 | 0.843 | 1.92  | 3.93  | 2  | 2  | 560 | 63.9  | 8.19 |
| O60462 | Neuropilin-2<br>OS=Homo sapiens<br>GN=NRP2<br>PE=1 SV=2 - [NRP2_HUMAN]                                              | 4.73  | 1 | 4 | 4 | 6  | 0.741 | 2.817 | 0.762 | 0.843 | 13.92 | 4.73  | 5  | 6  | 931 | 104.8 | 5.17 |
| P55285 | Cadherin-6<br>OS=Homo sapiens<br>GN=CDH6<br>PE=1 SV=1 - [CADH6_HUMAN]                                               | 3.16  | 1 | 2 | 2 | 4  | 1.083 | 0.736 | 0.913 | 0.843 | 10.54 | 3.16  | 3  | 4  | 790 | 88.3  | 4.93 |

|        |                                                                                                                              |       |   |     |     |      |       |       |       |       |         |       |     |      |      |       |      |
|--------|------------------------------------------------------------------------------------------------------------------------------|-------|---|-----|-----|------|-------|-------|-------|-------|---------|-------|-----|------|------|-------|------|
| Q8IU85 | Calcium/calmodulin-dependent protein kinase type 1D<br>OS=Homo sapiens<br>GN=CAMK1D<br>PE=1 SV=1 - [KCC1D_HUMAN]             | 31.17 | 1 | 8   | 11  | 24   | 0.885 | 0.809 | 0.861 | 0.844 | 49.83   | 31.17 | 16  | 24   | 385  | 42.9  | 7.21 |
| Q9BQE3 | Tubulin alpha-1C chain<br>OS=Homo sapiens<br>GN=TUBA1C<br>PE=1 SV=1 - [TBA1C_HUMAN]                                          | 53.90 | 3 | 3   | 26  | 1101 | 1.010 | 1.000 | 1.126 | 0.844 | 3269.27 | 53.90 | 46  | 1101 | 449  | 49.9  | 5.10 |
| Q96HQ0 | Zinc finger protein 419<br>OS=Homo sapiens<br>GN=ZNF419<br>PE=2 SV=2 - [ZNF419_HUMAN]                                        | 1.37  | 1 | 1   | 1   | 6    | 1.042 | 0.844 | 0.665 | 0.844 | 13.72   | 1.37  | 1   | 6    | 510  | 58.5  | 8.98 |
| Q8IV36 | Protein HID1<br>OS=Homo sapiens<br>GN=HID1 PE=1 SV=1 - [HID1_HUMAN]                                                          | 2.03  | 1 | 2   | 2   | 3    | 1.074 | 1.001 | 0.914 | 0.844 | 8.05    | 2.03  | 2   | 3    | 788  | 88.7  | 6.06 |
| Q9HCU5 | Prolactin regulatory element-binding protein<br>OS=Homo sapiens<br>GN=PREB<br>PE=1 SV=2 - [PREB_HUMAN]                       | 25.90 | 1 | 7   | 7   | 25   | 0.646 | 0.780 | 0.956 | 0.844 | 43.67   | 25.90 | 11  | 25   | 417  | 45.4  | 7.88 |
| Q86YW0 | 1-phosphatidylinositol 4,5-bisphosphate phosphodiesterase zeta-1<br>OS=Homo sapiens<br>GN=PLCZ1<br>PE=2 SV=1 - [PLCZ1_HUMAN] | 0.99  | 1 | 1   | 1   | 1    | 1.350 | 0.987 | 0.881 | 0.844 | 0.00    | 0.99  | 1   | 1    | 608  | 70.4  | 9.04 |
| Q8TB36 | Ganglioside-induced differentiation-associated protein 1<br>OS=Homo sapiens<br>GN=GDAP1<br>PE=1 SV=3 - [GDAP1_HUMAN]         | 2.23  | 1 | 1   | 1   | 3    | 0.673 | 1.443 | 0.984 | 0.844 | 5.52    | 2.23  | 2   | 3    | 358  | 41.3  | 8.34 |
| Q9Y490 | Talin-1<br>OS=Homo sapiens<br>GN=TLN1 PE=1 SV=3 - [TLN1_HUMAN]                                                               | 61.47 | 3 | 124 | 148 | 1939 | 0.953 | 1.086 | 1.231 | 0.844 | 4995.92 | 61.47 | 245 | 1939 | 2541 | 269.6 | 6.07 |



|        |                                                                                                                                      |       |   |    |    |    |       |       |       |       |        |       |    |    |      |       |       |
|--------|--------------------------------------------------------------------------------------------------------------------------------------|-------|---|----|----|----|-------|-------|-------|-------|--------|-------|----|----|------|-------|-------|
| P08912 | Muscarinic acetylcholine receptor M5<br>OS=Homo sapiens<br>GN=CHRM5<br>PE=2 SV=2 - [ACM5_HUMAN]                                      | 2.44  | 1 | 1  | 1  | 1  | 1.569 | 1.167 | 0.856 | 0.845 | 1.97   | 2.44  | 1  | 1  | 532  | 60.0  | 9.28  |
| Q86YV9 | Hermansky-Pudlak syndrome 6 protein<br>OS=Homo sapiens<br>GN=HPS6<br>PE=1 SV=1 - [HPS6_HUMAN]                                        | 4.65  | 1 | 4  | 4  | 7  | 0.990 | 0.814 | 1.000 | 0.845 | 11.60  | 4.65  | 5  | 7  | 775  | 82.9  | 6.28  |
| Q6DKI1 | 60S ribosomal protein L7-like 1<br>OS=Homo sapiens<br>GN=RPL7L1<br>PE=1 SV=1 - [RL7L_HUMAN]                                          | 13.41 | 1 | 3  | 3  | 5  | 0.759 | 1.577 | 1.292 | 0.845 | 10.94  | 13.41 | 4  | 5  | 246  | 28.6  | 10.51 |
| Q15286 | Ras-related protein Rab-35<br>OS=Homo sapiens<br>GN=RAB35<br>PE=1 SV=1 - [RAB35_HUMAN]                                               | 58.21 | 3 | 8  | 12 | 78 | 1.102 | 1.140 | 0.989 | 0.845 | 185.70 | 58.21 | 19 | 78 | 201  | 23.0  | 8.29  |
| Q8TBC4 | NEDD8-activating enzyme E1 catalytic subunit<br>OS=Homo sapiens<br>GN=UBA3<br>PE=1 SV=2 - [UBA3_HUMAN]                               | 30.24 | 1 | 12 | 12 | 54 | 0.894 | 0.848 | 0.817 | 0.845 | 157.36 | 30.24 | 19 | 54 | 463  | 51.8  | 5.45  |
| Q5JPI3 | Uncharacterized protein C3orf38<br>OS=Homo sapiens<br>GN=C3orf38<br>PE=1 SV=1 - [CC038_HUMAN]                                        | 10.03 | 1 | 2  | 2  | 4  | 1.169 | 1.169 | 1.527 | 0.845 | 11.78  | 10.03 | 3  | 4  | 329  | 37.5  | 6.47  |
| Q6ZR85 | Uncharacterized protein C17orf107<br>OS=Homo sapiens<br>GN=C17orf107<br>PE=2 SV=1 - [CQ107_HUMAN]                                    | 5.79  | 1 | 1  | 1  | 1  | 0.722 | 0.933 | 0.855 | 0.845 | 0.00   | 5.79  | 1  | 1  | 190  | 19.9  | 7.46  |
| Q92538 | Golgi-specific brefeldin A-resistance guanine nucleotide exchange factor 1<br>OS=Homo sapiens<br>GN=GBF1<br>PE=1 SV=2 - [GBF1_HUMAN] | 13.39 | 1 | 21 | 23 | 84 | 0.819 | 0.911 | 0.920 | 0.845 | 177.98 | 13.39 | 33 | 84 | 1859 | 206.3 | 5.73  |

|        |                                                                                                                       |       |   |    |    |    |       |       |       |       |        |       |    |    |      |       |      |
|--------|-----------------------------------------------------------------------------------------------------------------------|-------|---|----|----|----|-------|-------|-------|-------|--------|-------|----|----|------|-------|------|
| Q9HCU0 | Endosialin<br>OS=Homo sapiens<br>GN=CD248<br>PE=1 SV=1 - [CD248_HUMAN]                                                | 12.68 | 1 | 7  | 7  | 10 | 0.736 | 0.600 | 0.911 | 0.845 | 22.07  | 12.68 | 8  | 10 | 757  | 80.8  | 5.35 |
| Q8IUH4 | Palmitoyltransferase ZDHHC13<br>OS=Homo sapiens<br>GN=ZDHHC13<br>PE=1 SV=3 - [ZDH13_HUMAN]                            | 3.54  | 2 | 2  | 2  | 6  | 0.714 | 0.641 | 0.587 | 0.845 | 13.41  | 3.54  | 3  | 6  | 622  | 70.8  | 8.07 |
| P04632 | Calpain small subunit 1<br>OS=Homo sapiens<br>GN=CAPNS1<br>PE=1 SV=1 - [CPNS1_HUMAN]                                  | 44.03 | 2 | 13 | 13 | 83 | 1.325 | 0.786 | 1.033 | 0.845 | 248.46 | 44.03 | 18 | 83 | 268  | 28.3  | 5.20 |
| Q13884 | Beta-1-syntrophin<br>OS=Homo sapiens<br>GN=SNTB1<br>PE=1 SV=3 - [SNTB1_HUMAN]                                         | 15.24 | 2 | 5  | 8  | 15 | 1.853 | 0.950 | 0.881 | 0.846 | 29.97  | 15.24 | 13 | 15 | 538  | 58.0  | 8.63 |
| Q6Y2X3 | DnaJ homolog subfamily C member 14<br>OS=Homo sapiens<br>GN=DNAJC14<br>PE=2 SV=2 - [DJC14_HUMAN]                      | 0.85  | 1 | 1  | 1  | 1  | 0.817 | 0.890 | 0.905 | 0.846 | 1.79   | 0.85  | 1  | 1  | 702  | 78.5  | 8.09 |
| P41218 | Myeloid cell nuclear differentiation antigen<br>OS=Homo sapiens<br>GN=MNDA<br>PE=1 SV=1 - [MNDA_HUMAN]                | 3.19  | 1 | 2  | 2  | 4  | 3.763 | 0.794 | 0.838 | 0.846 | 11.27  | 3.19  | 2  | 4  | 407  | 45.8  | 9.76 |
| Q8TD55 | Pleckstrin homology domain-containing family O member 2<br>OS=Homo sapiens<br>GN=PLEKHO2<br>PE=2 SV=1 - [PKHO2_HUMAN] | 33.88 | 1 | 14 | 14 | 59 | 1.195 | 0.716 | 0.915 | 0.846 | 138.46 | 33.88 | 24 | 59 | 490  | 53.3  | 5.43 |
| O60683 | Peroxisome biogenesis factor 10<br>OS=Homo sapiens<br>GN=PEX10<br>PE=1 SV=1 - [PEX10_HUMAN]                           | 5.21  | 1 | 1  | 1  | 1  | 0.627 | 1.317 | 1.264 | 0.846 | 0.00   | 5.21  | 1  | 1  | 326  | 37.0  | 9.99 |
| Q9H7T0 | Cation channel sperm-associated protein subunit beta<br>OS=Homo sapiens<br>GN=CATSPERB<br>PE=2 SV=2 - [CTSRB_HUMAN]   | 1.25  | 1 | 1  | 1  | 2  | 1.282 | 0.491 | 1.383 | 0.846 | 4.13   | 1.25  | 1  | 2  | 1116 | 126.8 | 7.17 |

|        |                                                                                                                                                                                                                 |       |   |    |    |    |       |       |       |       |       |       |    |    |      |       |      |
|--------|-----------------------------------------------------------------------------------------------------------------------------------------------------------------------------------------------------------------|-------|---|----|----|----|-------|-------|-------|-------|-------|-------|----|----|------|-------|------|
| Q6P0Q8 | Microtubule-associated serine/threonine-protein kinase 2<br>OS=Homo sapiens<br>GN=MAST2<br>PE=1 SV=2 - [MAST2_HUMAN<br>TBC1 domain family member 30 OS=Homo sapiens<br>GN=TBC1D30<br>PE=1 SV=2 - [TBC30_HUMAN ] | 1.45  | 1 | 2  | 2  | 2  | 0.771 | 1.015 | 1.403 | 0.846 | 3.05  | 1.45  | 2  | 2  | 1798 | 196.3 | 8.16 |
| Q9Y2I9 | Sterol-4-alpha-carboxylate 3-dehydrogenase<br>,<br>decarboxylating<br>OS=Homo sapiens<br>GN=NSDHL<br>PE=1 SV=2 - [NSDHL_HUMAN                                                                                   | 1.41  | 1 | 2  | 2  | 2  | 0.898 | 0.985 | 1.033 | 0.846 | 4.33  | 1.41  | 2  | 2  | 924  | 102.7 | 8.29 |
| Q15738 | Insulin-like growth factor-binding protein 4 OS=Homo sapiens<br>GN=IGFBP4<br>PE=1 SV=2 - [IBP4_HUMAN]                                                                                                           | 22.52 | 1 | 8  | 8  | 14 | 0.856 | 0.661 | 0.901 | 0.846 | 32.86 | 22.52 | 12 | 14 | 373  | 41.9  | 8.06 |
| P22692 | GTP-binding protein Rheb<br>OS=Homo sapiens<br>GN=RHEB<br>PE=1 SV=1 - [RHEB_HUMAN]                                                                                                                              | 25.19 | 1 | 4  | 4  | 17 | 0.755 | 0.832 | 0.633 | 0.847 | 40.06 | 25.19 | 7  | 17 | 258  | 27.9  | 7.15 |
| Q15382 | Phosphomannomutase 1<br>OS=Homo sapiens<br>GN=PMM1<br>PE=1 SV=2 - [PMM1_HUMAN ]                                                                                                                                 | 22.83 | 1 | 5  | 5  | 40 | 0.910 | 0.935 | 0.919 | 0.847 | 76.96 | 22.83 | 8  | 40 | 184  | 20.5  | 5.92 |
| Q92871 | Alpha-soluble NSF attachment protein<br>OS=Homo sapiens<br>GN=NAPA<br>PE=1 SV=3 - [SNAA_HUMAN]                                                                                                                  | 29.77 | 1 | 6  | 7  | 22 | 1.058 | 0.955 | 1.537 | 0.847 | 43.23 | 29.77 | 11 | 22 | 262  | 29.7  | 5.74 |
| P54920 | Gamma-aminobutyric acid receptor-associated protein-like 1<br>OS=Homo sapiens<br>GN=GABARAPL1<br>PE=1 SV=1 - [GBRL1_HUMAN ]                                                                                     | 43.73 | 2 | 11 | 11 | 24 | 1.070 | 0.886 | 1.074 | 0.847 | 73.63 | 43.73 | 16 | 24 | 295  | 33.2  | 5.36 |
| Q9HOR8 |                                                                                                                                                                                                                 | 26.50 | 1 | 2  | 4  | 12 | 1.616 | 0.528 | 0.628 | 0.847 | 22.06 | 26.50 | 6  | 12 | 117  | 14.0  | 8.73 |

|        |                                                                                                                                                |       |   |    |    |     |       |       |       |       |        |       |    |     |      |       |      |
|--------|------------------------------------------------------------------------------------------------------------------------------------------------|-------|---|----|----|-----|-------|-------|-------|-------|--------|-------|----|-----|------|-------|------|
| Q86SQ0 | Pleckstrin<br>homology-like<br>domain family<br>B member 2<br>OS=Homo<br>sapiens<br>GN=PHLDB2<br>PE=1 SV=2 -<br>[PHLB2_HUMAN<br>]              | 12.21 | 1 | 14 | 14 | 31  | 0.916 | 1.039 | 0.707 | 0.847 | 55.21  | 12.21 | 21 | 31  | 1253 | 142.1 | 7.43 |
| Q9NYV6 | RNA<br>polymerase I-<br>specific<br>transcription<br>initiation factor<br>RRN3<br>OS=Homo<br>sapiens<br>GN=RRN3<br>PE=1 SV=1 -<br>[RRN3_HUMAN] | 3.99  | 1 | 2  | 2  | 2   | 0.790 | 2.110 | 1.739 | 0.847 | 3.84   | 3.99  | 2  | 2   | 651  | 74.1  | 5.63 |
| Q7Z3U7 | Protein MON2<br>homolog<br>OS=Homo<br>sapiens<br>GN=MON2<br>PE=1 SV=3 -<br>[MON2_HUMAN<br>]                                                    | 5.42  | 1 | 8  | 8  | 14  | 0.829 | 0.705 | 0.616 | 0.847 | 26.80  | 5.42  | 10 | 14  | 1717 | 190.2 | 6.06 |
| O60343 | TBC1 domain<br>family member<br>4 OS=Homo<br>sapiens<br>GN=TBC1D4<br>PE=1 SV=2 -<br>[TBCD4_HUMAN<br>]                                          | 5.47  | 1 | 6  | 6  | 15  | 1.084 | 1.134 | 1.089 | 0.847 | 30.39  | 5.47  | 7  | 15  | 1298 | 146.5 | 7.01 |
| P53621 | Coatmer<br>subunit alpha<br>OS=Homo<br>sapiens<br>GN=COPA<br>PE=1 SV=2 -<br>[COPA_HUMAN]                                                       | 37.50 | 1 | 51 | 51 | 414 | 0.769 | 0.767 | 0.772 | 0.847 | 930.63 | 37.50 | 84 | 414 | 1224 | 138.3 | 7.66 |
| Q96JP0 | Protein fem-1<br>homolog C<br>OS=Homo<br>sapiens<br>GN=FEM1C<br>PE=1 SV=1 -<br>[FEM1C_HUMAN<br>]                                               | 5.02  | 2 | 2  | 2  | 3   | 1.318 | 0.973 | 0.663 | 0.847 | 6.31   | 5.02  | 2  | 3   | 617  | 68.6  | 7.68 |
| Q14247 | Src substrate<br>cortactin<br>OS=Homo<br>sapiens<br>GN=CTTN<br>PE=1 SV=2 -<br>[SRC8_HUMAN]                                                     | 52.18 | 1 | 36 | 36 | 240 | 0.998 | 1.177 | 1.006 | 0.847 | 632.88 | 52.18 | 65 | 240 | 550  | 61.5  | 5.40 |
| Q92905 | COP9<br>signalosome<br>complex<br>subunit 5<br>OS=Homo<br>sapiens<br>GN=COP55<br>PE=1 SV=4 -<br>[CSN5_HUMAN]                                   | 18.86 | 1 | 5  | 5  | 23  | 0.908 | 0.753 | 0.735 | 0.848 | 60.57  | 18.86 | 9  | 23  | 334  | 37.6  | 6.54 |
| P27169 | Serum<br>paraoxonase/a<br>ryl esterase 1<br>OS=Homo<br>sapiens<br>GN=PON1<br>PE=1 SV=3 -<br>[PON1_HUMAN]                                       | 3.38  | 2 | 2  | 2  | 3   | 1.287 | 0.625 | 0.820 | 0.848 | 6.74   | 3.38  | 2  | 3   | 355  | 39.7  | 5.22 |

|        |                                                                                                          |       |   |    |    |    |       |       |       |       |        |       |    |    |      |       |      |
|--------|----------------------------------------------------------------------------------------------------------|-------|---|----|----|----|-------|-------|-------|-------|--------|-------|----|----|------|-------|------|
| Q96EE3 | Nudeoporin<br>SEH1<br>OS=Homo sapiens<br>GN=SEH1L<br>PE=1 SV=3 - [SEH1_HUMAN]                            | 17.22 | 1 | 3  | 3  | 6  | 1.151 | 0.380 | 0.498 | 0.848 | 27.08  | 17.22 | 4  | 6  | 360  | 39.6  | 8.09 |
| Q9BQI9 | Nuclear receptor-interacting protein 2<br>OS=Homo sapiens<br>GN=NRIP2<br>PE=2 SV=3 - [NRIP2_HUMAN]       | 3.91  | 1 | 1  | 1  | 1  | 1.116 | 0.330 | 0.624 | 0.848 | 2.08   | 3.91  | 1  | 1  | 281  | 31.3  | 8.40 |
| P40818 | Ubiquitin carboxyl-terminal hydrolase 8<br>OS=Homo sapiens<br>GN=USP8<br>PE=1 SV=1 - [UBP8_HUMAN]        | 7.07  | 1 | 8  | 8  | 12 | 0.897 | 0.910 | 1.100 | 0.848 | 23.78  | 7.07  | 11 | 12 | 1118 | 127.4 | 8.51 |
| Q13045 | Protein flightless-1 homolog<br>OS=Homo sapiens<br>GN=FLII PE=1 SV=2 - [FLII_HUMAN]                      | 23.17 | 1 | 28 | 28 | 78 | 0.826 | 0.998 | 1.022 | 0.848 | 203.95 | 23.17 | 41 | 78 | 1269 | 144.7 | 6.05 |
| P04234 | T-cell surface glycoprotein CD3 delta chain<br>OS=Homo sapiens<br>GN=CD3D<br>PE=1 SV=1 - [CD3D_HUMAN]    | 7.02  | 1 | 1  | 1  | 1  | 0.738 | 2.056 | 1.725 | 0.848 | 0.00   | 7.02  | 1  | 1  | 171  | 18.9  | 5.54 |
| Q9H7C9 | Mth938 domain-containing protein<br>OS=Homo sapiens<br>GN=AAMDC<br>PE=1 SV=1 - [AAMDC_HUMAN]             | 52.46 | 1 | 6  | 6  | 18 | 0.915 | 1.105 | 0.924 | 0.848 | 47.22  | 52.46 | 8  | 18 | 122  | 13.3  | 8.46 |
| P29317 | Ephrin type-A receptor 2<br>OS=Homo sapiens<br>GN=EPHA2<br>PE=1 SV=2 - [EPHA2_HUMAN]                     | 13.42 | 7 | 9  | 11 | 18 | 1.649 | 0.721 | 1.088 | 0.849 | 35.25  | 13.42 | 18 | 18 | 976  | 108.2 | 6.23 |
| Q9NXR1 | Nuclear distribution protein nude homolog 1<br>OS=Homo sapiens<br>GN=NDE1<br>PE=1 SV=2 - [NDE1_HUMAN]    | 13.29 | 1 | 4  | 5  | 11 | 1.069 | 1.406 | 1.044 | 0.849 | 26.59  | 13.29 | 7  | 11 | 346  | 38.8  | 5.27 |
| P10586 | Receptor-type tyrosine-protein phosphatase F<br>OS=Homo sapiens<br>GN=PTPRF<br>PE=1 SV=2 - [PTPRF_HUMAN] | 6.14  | 2 | 4  | 7  | 11 | 0.883 | 0.929 | 0.933 | 0.849 | 20.94  | 6.14  | 9  | 11 | 1907 | 212.7 | 6.30 |

|        |                                                                                                                                                                                                                                                      |       |   |    |    |     |       |       |       |       |        |       |    |     |      |       |      |
|--------|------------------------------------------------------------------------------------------------------------------------------------------------------------------------------------------------------------------------------------------------------|-------|---|----|----|-----|-------|-------|-------|-------|--------|-------|----|-----|------|-------|------|
| Q70Z35 | Phosphatidylinositol 3,4,5-trisphosphate-dependent Rac exchanger 2 protein<br>OS=Homo sapiens<br>GN=PREX2<br>PE=2 SV=1 - [PREX2_HUMAN]<br>26S proteasome non-ATPase regulatory subunit 2<br>OS=Homo sapiens<br>GN=PSMD2<br>PE=1 SV=3 - [PSMD2_HUMAN] | 0.56  | 1 | 1  | 1  | 1   | 0.428 | 0.655 | 0.701 | 0.849 | 2.57   | 0.56  | 1  | 1   | 1606 | 182.5 | 7.44 |
| Q13200 | Mitochondrial glutamate carrier 1<br>OS=Homo sapiens<br>GN=SLC25A22<br>PE=1 SV=1 - [GHC1_HUMAN]                                                                                                                                                      | 42.29 | 2 | 32 | 32 | 146 | 0.800 | 0.915 | 0.832 | 0.849 | 354.35 | 42.29 | 51 | 146 | 908  | 100.1 | 5.20 |
| Q9H936 | Protein disulfide-isomerase TMX3<br>OS=Homo sapiens<br>GN=TMX3<br>PE=1 SV=2 - [TMX3_HUMAN]                                                                                                                                                           | 17.34 | 2 | 6  | 6  | 18  | 0.852 | 0.887 | 0.993 | 0.849 | 36.83  | 17.34 | 10 | 18  | 323  | 34.4  | 9.29 |
| Q96JJ7 | Prostaglandin G/H synthase 2<br>OS=Homo sapiens<br>GN=PTGS2<br>PE=1 SV=2 - [PGH2_HUMAN]                                                                                                                                                              | 28.19 | 1 | 10 | 11 | 43  | 0.981 | 0.478 | 0.586 | 0.849 | 80.84  | 28.19 | 18 | 43  | 454  | 51.8  | 4.91 |
| P35354 | Cerebellar degeneration-related protein 2<br>OS=Homo sapiens<br>GN=CDR2<br>PE=1 SV=2 - [CDR2_HUMAN]                                                                                                                                                  | 5.63  | 1 | 2  | 2  | 7   | 1.009 | 1.283 | 1.379 | 0.849 | 29.57  | 5.63  | 3  | 7   | 604  | 69.0  | 7.39 |
| Q01850 | F-box/WD repeat-containing protein 8<br>OS=Homo sapiens<br>GN=FBXW8<br>PE=1 SV=2 - [FBXW8_HUMAN]                                                                                                                                                     | 17.84 | 1 | 6  | 6  | 14  | 0.737 | 0.773 | 0.844 | 0.849 | 35.91  | 17.84 | 9  | 14  | 454  | 51.8  | 5.06 |
| Q8N3Y1 | DnaJ homolog subfamily C member 21<br>OS=Homo sapiens<br>GN=DNAJC21<br>PE=1 SV=2 - [DJC21_HUMAN]                                                                                                                                                     | 2.01  | 1 | 1  | 1  | 2   | 0.670 | 0.543 | 0.981 | 0.850 | 3.97   | 2.01  | 2  | 2   | 598  | 67.4  | 5.67 |
| Q5F1R6 |                                                                                                                                                                                                                                                      | 7.91  | 1 | 3  | 3  | 11  | 1.047 | 0.980 | 1.028 | 0.850 | 37.05  | 7.91  | 4  | 11  | 531  | 62.0  | 5.47 |

|        |                                                                                                                                                                                                                                                                  |       |   |    |    |     |       |       |       |       |        |       |    |     |      |       |      |
|--------|------------------------------------------------------------------------------------------------------------------------------------------------------------------------------------------------------------------------------------------------------------------|-------|---|----|----|-----|-------|-------|-------|-------|--------|-------|----|-----|------|-------|------|
| Q96IV0 | Peptide-N(4)-<br>(N-acetyl-beta-<br>glucosaminy)as<br>paragine<br>amidase<br>OS=Homo<br>sapiens<br>GN=NGLY1<br>PE=1 SV=1 -<br>[NGLY1_HUMAN<br>]<br>E3<br>ubiquitin/ISG15<br>ligase TRIM25<br>OS=Homo<br>sapiens<br>GN=TRIM25<br>PE=1 SV=2 -<br>[TRI25_HUMAN<br>] | 5.35  | 1 | 4  | 4  | 10  | 0.689 | 1.211 | 1.175 | 0.850 | 16.84  | 5.35  | 6  | 10  | 654  | 74.3  | 6.89 |
| Q14258 | Protein dopey-<br>2 OS=Homo<br>sapiens<br>GN=DOPEY2<br>PE=1 SV=5 -<br>[DOP2_HUMAN]                                                                                                                                                                               | 34.13 | 1 | 18 | 18 | 76  | 1.101 | 0.864 | 0.907 | 0.850 | 164.53 | 34.13 | 30 | 76  | 630  | 70.9  | 8.09 |
| Q9Y3R5 | Septin-2<br>OS=Homo<br>sapiens<br>GN=SEPT2<br>PE=1 SV=1 -<br>[SEPT2_HUMAN<br>]<br>Coordinator of<br>PRMT5 and<br>differentiation<br>stimulator<br>OS=Homo<br>sapiens<br>GN=COPRS<br>PE=1 SV=3 -<br>[COPRS_HUMA<br>N]                                             | 1.83  | 1 | 3  | 4  | 7   | 0.740 | 1.097 | 1.441 | 0.851 | 14.42  | 1.83  | 5  | 7   | 2298 | 258.1 | 6.29 |
| Q15019 | V-type proton<br>ATPase 116<br>kDa subunit a<br>isoform 1<br>OS=Homo<br>sapiens<br>GN=ATP6V0A1<br>PE=2 SV=3 -<br>[VPP1_HUMAN]                                                                                                                                    | 75.35 | 1 | 21 | 22 | 323 | 0.923 | 1.078 | 1.135 | 0.851 | 907.18 | 75.35 | 41 | 323 | 361  | 41.5  | 6.60 |
| Q9NQ92 | Zinc finger<br>protein 793<br>OS=Homo<br>sapiens<br>GN=ZNF793<br>PE=2 SV=2 -<br>[ZN793_HUMAN<br>]<br>Integrator<br>complex<br>subunit 5<br>OS=Homo<br>sapiens<br>GN=INTS5<br>PE=1 SV=1 -<br>[INT5_HUMAN]                                                         | 6.52  | 1 | 1  | 1  | 1   | 0.584 | 0.964 | 1.136 | 0.851 | 3.13   | 6.52  | 1  | 1   | 184  | 20.1  | 4.18 |
| Q93050 | Phospholipase<br>DDHD2<br>OS=Homo<br>sapiens<br>GN=DDHD2<br>PE=1 SV=2 -<br>[DDHD2_HUMAN<br>]                                                                                                                                                                     | 21.15 | 1 | 12 | 13 | 32  | 0.922 | 0.961 | 1.070 | 0.851 | 86.70  | 21.15 | 21 | 32  | 837  | 96.4  | 6.43 |
| Q6ZN11 |                                                                                                                                                                                                                                                                  | 2.96  | 1 | 1  | 1  | 2   | 0.604 | 0.636 | 0.736 | 0.851 | 0.00   | 2.96  | 1  | 2   | 406  | 46.9  | 9.33 |
| Q6P9B9 |                                                                                                                                                                                                                                                                  | 4.71  | 1 | 4  | 4  | 6   | 1.052 | 1.092 | 0.676 | 0.851 | 10.71  | 4.71  | 6  | 6   | 1019 | 107.9 | 7.05 |
| O94830 |                                                                                                                                                                                                                                                                  | 1.97  | 1 | 1  | 1  | 6   | 1.534 | 1.502 | 0.833 | 0.851 | 14.85  | 1.97  | 1  | 6   | 711  | 81.0  | 5.39 |

|        |                                                                                                         |       |   |    |    |     |       |       |       |       |         |       |    |     |      |       |      |
|--------|---------------------------------------------------------------------------------------------------------|-------|---|----|----|-----|-------|-------|-------|-------|---------|-------|----|-----|------|-------|------|
| Q99720 | Sigma non-opioid intracellular receptor 1<br>OS=Homo sapiens<br>GN=SIGMAR1<br>PE=1 SV=1 - [SGMR1_HUMAN] | 12.11 | 1 | 3  | 3  | 12  | 0.704 | 0.992 | 0.717 | 0.851 | 24.40   | 12.11 | 5  | 12  | 223  | 25.1  | 5.96 |
| Q9Y2V7 | Conserved oligomeric Golgi complex subunit 6<br>OS=Homo sapiens<br>GN=COG6<br>PE=1 SV=2 - [COG6_HUMAN]  | 6.39  | 1 | 2  | 4  | 12  | 0.807 | 1.256 | 1.576 | 0.851 | 18.33   | 6.39  | 6  | 12  | 657  | 73.2  | 5.76 |
| Q9BS40 | Latexin<br>OS=Homo sapiens<br>GN=LXN PE=1 SV=2 - [LXN_HUMAN]                                            | 18.92 | 1 | 5  | 5  | 76  | 0.834 | 1.904 | 1.170 | 0.852 | 116.58  | 18.92 | 7  | 76  | 222  | 25.7  | 5.78 |
| Q13510 | Acid ceramidase<br>OS=Homo sapiens<br>GN=ASAHI<br>PE=1 SV=5 - [ASAHI_HUMAN]                             | 37.97 | 1 | 18 | 18 | 74  | 0.630 | 1.040 | 0.901 | 0.852 | 185.14  | 37.97 | 27 | 74  | 395  | 44.6  | 7.62 |
| P61160 | Actin-related protein 2<br>OS=Homo sapiens<br>GN=ACTR2<br>PE=1 SV=1 - [ARP2_HUMAN]                      | 49.24 | 1 | 16 | 17 | 363 | 0.883 | 0.977 | 1.177 | 0.852 | 1001.22 | 49.24 | 29 | 363 | 394  | 44.7  | 6.74 |
| Q08378 | Golgin subfamily A member 3<br>OS=Homo sapiens<br>GN=GOLGA3<br>PE=1 SV=2 - [GOLGA3_HUMAN]               | 35.05 | 1 | 50 | 51 | 188 | 0.820 | 0.942 | 1.013 | 0.852 | 507.54  | 35.05 | 80 | 188 | 1498 | 167.3 | 5.44 |
| Q9BZ67 | FERM domain-containing protein 8<br>OS=Homo sapiens<br>GN=FRMD8<br>PE=1 SV=1 - [FRMD8_HUMAN]            | 6.68  | 2 | 3  | 3  | 18  | 1.229 | 0.983 | 1.269 | 0.852 | 46.19   | 6.68  | 4  | 18  | 464  | 51.2  | 6.23 |
| P07741 | Adenine phosphoribosyltransferase<br>OS=Homo sapiens<br>GN=APRT<br>PE=1 SV=2 - [APT_HUMAN]              | 45.56 | 1 | 5  | 5  | 39  | 1.037 | 0.994 | 0.989 | 0.852 | 102.94  | 45.56 | 9  | 39  | 180  | 19.6  | 6.02 |
| Q9UJM3 | ERBB receptor feedback inhibitor 1<br>OS=Homo sapiens<br>GN=ERRFI1<br>PE=1 SV=1 - [ERRFI1_HUMAN]        | 4.98  | 1 | 2  | 2  | 5   | 0.639 | 0.658 | 1.019 | 0.852 | 6.01    | 4.98  | 3  | 5   | 462  | 50.5  | 8.10 |



|        |                                                                                                                        |       |   |    |    |     |       |       |       |       |         |       |    |     |      |       |      |
|--------|------------------------------------------------------------------------------------------------------------------------|-------|---|----|----|-----|-------|-------|-------|-------|---------|-------|----|-----|------|-------|------|
| P0C0L4 | Complement<br>C4-A<br>OS=Homo<br>sapiens<br>GN=C4A PE=1<br>SV=2 -<br>[CO4A_HUMAN]                                      | 4.19  | 2 | 4  | 5  | 17  | 0.680 | 1.003 | 0.657 | 0.852 | 31.45   | 4.19  | 7  | 17  | 1744 | 192.7 | 7.08 |
| P30085 | UMP-CMP<br>kinase<br>OS=Homo<br>sapiens<br>GN=CMPK1<br>PE=1 SV=3 -<br>[KCY_HUMAN]                                      | 48.47 | 1 | 9  | 9  | 87  | 0.973 | 0.886 | 1.039 | 0.852 | 305.03  | 48.47 | 14 | 87  | 196  | 22.2  | 5.57 |
| P30046 | D-dopachrome<br>decarboxylase<br>OS=Homo<br>sapiens<br>GN=DDT PE=1<br>SV=3 -<br>[DOPD_HUMAN]                           | 22.03 | 2 | 3  | 3  | 8   | 0.910 | 1.040 | 0.917 | 0.852 | 18.47   | 22.03 | 5  | 8   | 118  | 12.7  | 7.30 |
| P07148 | Fatty add-<br>binding<br>protein, liver<br>OS=Homo<br>sapiens<br>GN=FABP1<br>PE=1 SV=1 -<br>[FABPL_HUMAN]              | 6.30  | 1 | 1  | 1  | 1   | 1.396 | 0.877 | 0.551 | 0.852 | 1.66    | 6.30  | 1  | 1   | 127  | 14.2  | 7.18 |
| Q81UI8 | Cytokine<br>receptor-like<br>factor 3<br>OS=Homo<br>sapiens<br>GN=CRLF3<br>PE=1 SV=2 -<br>[CRLF3_HUMAN]                | 5.20  | 1 | 2  | 2  | 5   | 1.092 | 1.028 | 0.850 | 0.852 | 12.19   | 5.20  | 4  | 5   | 442  | 49.7  | 5.14 |
| Q53H82 | Beta-lactamase-<br>like protein 2<br>OS=Homo<br>sapiens<br>GN=LACTB2<br>PE=1 SV=2 -<br>[LACB2_HUMAN]                   | 38.89 | 1 | 10 | 10 | 29  | 1.069 | 1.184 | 1.022 | 0.852 | 73.82   | 38.89 | 15 | 29  | 288  | 32.8  | 6.80 |
| Q9BU89 | Deoxyhypusine<br>hydroxylase<br>OS=Homo<br>sapiens<br>GN=DOHH<br>PE=1 SV=1 -<br>[DOHH_HUMAN]                           | 24.50 | 1 | 4  | 4  | 7   | 1.024 | 1.388 | 1.042 | 0.852 | 23.23   | 24.50 | 5  | 7   | 302  | 32.9  | 4.83 |
| O15511 | Actin-related<br>protein 2/3<br>complex<br>subunit 5<br>OS=Homo<br>sapiens<br>GN=ARPC5<br>PE=1 SV=3 -<br>[ARPCS_HUMAN] | 55.63 | 1 | 8  | 10 | 85  | 1.055 | 1.134 | 1.164 | 0.853 | 206.26  | 55.63 | 17 | 85  | 151  | 16.3  | 5.67 |
| P19105 | Myosin<br>regulatory light<br>chain 12A<br>OS=Homo<br>sapiens<br>GN=MYL12A<br>PE=1 SV=2 -<br>[ML12A_HUMAN]             | 66.67 | 2 | 5  | 13 | 494 | 1.191 | 0.837 | 1.306 | 0.853 | 1309.61 | 66.67 | 22 | 494 | 171  | 19.8  | 4.81 |

|        |                                                                                                                                                                                                                             |       |   |    |    |     |       |       |       |       |        |       |    |     |      |       |      |
|--------|-----------------------------------------------------------------------------------------------------------------------------------------------------------------------------------------------------------------------------|-------|---|----|----|-----|-------|-------|-------|-------|--------|-------|----|-----|------|-------|------|
| P78329 | Phylloquinone<br>omega-<br>hydroxylase<br>CYP4F2<br>OS=Homo<br>sapiens<br>GN=CYP4F2<br>PE=1 SV=1 -<br>[CP4F2_HUMAN<br>]<br>Krueppel-like<br>factor 16<br>OS=Homo<br>sapiens<br>GN=KLF16<br>PE=1 SV=1 -<br>[KLF16_HUMAN<br>] | 2.69  | 2 | 2  | 2  | 3   | 1.498 | 0.828 | 0.808 | 0.853 | 6.74   | 2.69  | 2  | 3   | 520  | 59.8  | 7.08 |
| Q9BXK1 | Peroxisomal<br>acyl-CoA oxidase<br>16<br>OS=Homo<br>sapiens<br>GN=KLF16<br>PE=1 SV=1 -<br>[KLF16_HUMAN<br>]                                                                                                                 | 21.43 | 1 | 3  | 3  | 6   | 0.912 | 0.812 | 0.957 | 0.853 | 20.81  | 21.43 | 4  | 6   | 252  | 25.4  | 9.88 |
| Q13162 | Peroxisomal<br>acyl-CoA oxidase<br>4<br>OS=Homo<br>sapiens<br>GN=PRDX4<br>PE=1 SV=1 -<br>[PRDX4_HUMAN<br>]                                                                                                                  | 55.35 | 1 | 10 | 13 | 192 | 0.818 | 1.001 | 1.085 | 0.853 | 466.60 | 55.35 | 21 | 192 | 271  | 30.5  | 6.29 |
| Q9Y224 | UPF0568<br>protein<br>C14orf166<br>OS=Homo<br>sapiens<br>GN=C14orf166<br>PE=1 SV=1 -<br>[CN166_HUMAN<br>]                                                                                                                   | 59.84 | 1 | 13 | 13 | 70  | 0.837 | 0.952 | 1.061 | 0.853 | 196.43 | 59.84 | 25 | 70  | 244  | 28.1  | 6.65 |
| P47756 | F-actin-capping<br>protein subunit<br>beta<br>OS=Homo<br>sapiens<br>GN=CAPZB<br>PE=1 SV=4 -<br>[CAPZB_HUMAN<br>]                                                                                                            | 48.74 | 1 | 19 | 19 | 287 | 0.972 | 0.962 | 0.903 | 0.853 | 629.05 | 48.74 | 34 | 287 | 277  | 31.3  | 5.59 |
| P10599 | Thioredoxin<br>OS=Homo<br>sapiens<br>GN=TXN PE=1<br>SV=3 -<br>[THIO_HUMAN]                                                                                                                                                  | 42.86 | 1 | 7  | 7  | 202 | 1.158 | 0.685 | 0.947 | 0.853 | 571.17 | 42.86 | 11 | 202 | 105  | 11.7  | 4.92 |
| Q9NT62 | Ubiquitin-like-<br>conjugating<br>enzyme ATG3<br>OS=Homo<br>sapiens<br>GN=ATG3<br>PE=1 SV=1 -<br>[ATG3_HUMAN]                                                                                                               | 19.11 | 1 | 7  | 7  | 31  | 1.046 | 0.712 | 0.945 | 0.853 | 58.12  | 19.11 | 12 | 31  | 314  | 35.8  | 4.74 |
| Q16342 | Programmed<br>cell death<br>protein 2<br>OS=Homo<br>sapiens<br>GN=PDCCD2<br>PE=1 SV=2 -<br>[PDCCD2_HUMAN<br>]                                                                                                               | 6.40  | 1 | 2  | 2  | 2   | 0.797 | 0.740 | 1.086 | 0.853 | 1.90   | 6.40  | 2  | 2   | 344  | 38.6  | 5.38 |
| Q15751 | Probable E3<br>ubiquitin-<br>protein ligase<br>HERC1<br>OS=Homo<br>sapiens<br>GN=HERC1<br>PE=1 SV=2 -<br>[HERC1_HUMAN<br>]                                                                                                  | 0.78  | 1 | 3  | 3  | 5   | 0.708 | 0.956 | 0.929 | 0.854 | 12.92  | 0.78  | 5  | 5   | 4861 | 531.9 | 6.04 |

|        |                                                                                                                          |       |   |    |    |     |       |       |       |       |        |       |    |     |      |       |      |
|--------|--------------------------------------------------------------------------------------------------------------------------|-------|---|----|----|-----|-------|-------|-------|-------|--------|-------|----|-----|------|-------|------|
| Q6PCB5 | Round spermatid basic protein 1-like protein<br>OS=Homo sapiens<br>GN=RSBN1L<br>PE=1 SV=2 - [RSBN1_HUMAN]                | 0.83  | 1 | 1  | 1  | 1   | 1.265 | 1.824 | 0.994 | 0.854 | 2.38   | 0.83  | 1  | 1   | 846  | 94.8  | 8.78 |
| O76095 | Protein JTB<br>OS=Homo sapiens<br>GN=JTB PE=1<br>SV=1 - [JTB_HUMAN]                                                      | 13.70 | 1 | 2  | 2  | 4   | 0.940 | 1.413 | 1.013 | 0.854 | 11.10  | 13.70 | 3  | 4   | 146  | 16.3  | 8.28 |
| O95249 | Golgi SNAP receptor complex member 1<br>OS=Homo sapiens<br>GN=GOSR1<br>PE=1 SV=1 - [GOSR1_HUMAN]                         | 22.80 | 1 | 5  | 6  | 12  | 0.890 | 0.801 | 0.876 | 0.854 | 26.45  | 22.80 | 7  | 12  | 250  | 28.6  | 9.42 |
| Q6WCQ1 | Myosin phosphatase Rho-interacting protein<br>OS=Homo sapiens<br>GN=MPRIP<br>PE=1 SV=3 - [MPRIP_HUMAN]                   | 48.10 | 1 | 39 | 40 | 159 | 1.108 | 0.978 | 1.132 | 0.854 | 429.98 | 48.10 | 65 | 159 | 1025 | 116.5 | 6.21 |
| P46459 | Vesicle-fusing ATPase<br>OS=Homo sapiens<br>GN=NSF PE=1<br>SV=3 - [NSF_HUMAN]                                            | 39.92 | 1 | 30 | 31 | 121 | 0.925 | 0.863 | 0.999 | 0.854 | 260.26 | 39.92 | 50 | 121 | 744  | 82.5  | 6.95 |
| Q9NYB5 | Solute carrier organic anion transporter family member 1C1<br>OS=Homo sapiens<br>GN=SLCO1C1<br>PE=2 SV=1 - [SO1C1_HUMAN] | 2.25  | 1 | 1  | 1  | 1   | 2.465 | 0.451 | 2.036 | 0.854 | 0.00   | 2.25  | 1  | 1   | 712  | 78.6  | 8.50 |
| Q5TCZ1 | SH3 and PX domain-containing protein 2A<br>OS=Homo sapiens<br>GN=SH3PXD2A<br>PE=1 SV=1 - [SPD2A_HUMAN]                   | 10.59 | 1 | 8  | 9  | 18  | 0.964 | 0.898 | 0.899 | 0.854 | 30.74  | 10.59 | 15 | 18  | 1133 | 125.2 | 8.90 |
| Q9NU53 | Glycoprotein integral membrane protein 1<br>OS=Homo sapiens<br>GN=GINM1<br>PE=2 SV=1 - [GINM1_HUMAN]                     | 3.03  | 1 | 1  | 1  | 1   | 1.203 | 0.338 | 0.809 | 0.854 | 3.07   | 3.03  | 1  | 1   | 330  | 36.8  | 4.91 |

|        |                                                                                                       |       |   |    |    |    |       |       |       |       |        |       |    |    |      |       |      |
|--------|-------------------------------------------------------------------------------------------------------|-------|---|----|----|----|-------|-------|-------|-------|--------|-------|----|----|------|-------|------|
| Q9GZT9 | Egl nine homolog 1<br>OS=Homo sapiens<br>GN=EGLN1<br>PE=1 SV=1 - [EGLN1_HUMAN]                        | 22.07 | 2 | 7  | 7  | 30 | 0.998 | 1.077 | 1.067 | 0.854 | 77.94  | 22.07 | 11 | 30 | 426  | 46.0  | 8.53 |
| P55212 | Caspase-6<br>OS=Homo sapiens<br>GN=CASP6<br>PE=1 SV=2 - [CASP6_HUMAN]                                 | 3.41  | 1 | 1  | 1  | 4  | 1.478 | 1.228 | 0.848 | 0.854 | 12.64  | 3.41  | 2  | 4  | 293  | 33.3  | 6.93 |
| P28072 | Proteasome subunit beta type-6<br>OS=Homo sapiens<br>GN=PSMB6<br>PE=1 SV=4 - [PSB6_HUMAN]             | 12.97 | 1 | 3  | 3  | 6  | 0.805 | 0.848 | 0.843 | 0.854 | 14.51  | 12.97 | 4  | 6  | 239  | 25.3  | 4.92 |
| O14656 | Torsin-1A<br>OS=Homo sapiens<br>GN=TOR1A<br>PE=1 SV=1 - [TOR1A_HUMAN]                                 | 11.75 | 1 | 3  | 3  | 11 | 0.928 | 0.737 | 0.881 | 0.854 | 28.43  | 11.75 | 5  | 11 | 332  | 37.8  | 6.99 |
| O15204 | ADAM DEC1<br>OS=Homo sapiens<br>GN=ADAMDEC1<br>PE=1 SV=2 - [ADEC1_HUMAN]                              | 5.53  | 1 | 2  | 2  | 3  | 0.818 | 0.833 | 0.976 | 0.854 | 2.69   | 5.53  | 2  | 3  | 470  | 52.7  | 7.34 |
| Q96SB4 | SRSF protein kinase 1<br>OS=Homo sapiens<br>GN=SRPK1<br>PE=1 SV=2 - [SRPK1_HUMAN]                     | 14.96 | 1 | 6  | 7  | 22 | 0.743 | 1.118 | 0.891 | 0.854 | 61.56  | 14.96 | 12 | 22 | 655  | 74.3  | 6.16 |
| Q9Y4C2 | Protein FAM115A<br>OS=Homo sapiens<br>GN=FAM115A<br>PE=1 SV=3 - [F115A_HUMAN]                         | 9.55  | 1 | 9  | 9  | 31 | 1.043 | 0.707 | 1.149 | 0.855 | 76.69  | 9.55  | 15 | 31 | 921  | 102.1 | 6.54 |
| Q9NZH7 | Interleukin-36 beta<br>OS=Homo sapiens<br>GN=IL36B<br>PE=2 SV=1 - [IL36B_HUMAN]                       | 6.10  | 1 | 1  | 1  | 1  | 1.228 | 0.423 | 0.821 | 0.855 | 2.41   | 6.10  | 1  | 1  | 164  | 18.5  | 9.52 |
| Q9GZZ9 | Ubiquitin-like modifier-activating enzyme 5<br>OS=Homo sapiens<br>GN=UBA5<br>PE=1 SV=1 - [UBA5_HUMAN] | 6.93  | 2 | 2  | 3  | 16 | 0.834 | 0.952 | 0.856 | 0.855 | 41.44  | 6.93  | 5  | 16 | 404  | 44.8  | 4.84 |
| O15031 | Plexin-B2<br>OS=Homo sapiens<br>GN=PLXNB2<br>PE=1 SV=3 - [PLXB2_HUMAN]                                | 19.53 | 1 | 26 | 26 | 86 | 1.242 | 0.890 | 0.775 | 0.855 | 198.89 | 19.53 | 38 | 86 | 1838 | 205.0 | 6.24 |

|        |                                                                                                                             |       |   |    |    |    |       |       |       |       |        |       |    |    |      |       |      |
|--------|-----------------------------------------------------------------------------------------------------------------------------|-------|---|----|----|----|-------|-------|-------|-------|--------|-------|----|----|------|-------|------|
| O95803 | Bifunctional heparan sulfate N-deacetylase/N-sulfotransferase 3<br>OS=Homo sapiens<br>GN=NDST3<br>PE=2 SV=1 - [NDST3_HUMAN] | 0.80  | 1 | 1  | 1  | 6  | 0.737 | 0.869 | 0.930 | 0.855 | 13.57  | 0.80  | 1  | 6  | 873  | 100.8 | 8.06 |
| Q6UWE0 | E3 ubiquitin-protein ligase LRSAM1<br>OS=Homo sapiens<br>GN=LRSAM1<br>PE=1 SV=1 - [LRSM1_HUMAN]                             | 17.84 | 1 | 12 | 13 | 40 | 1.081 | 1.186 | 1.384 | 0.855 | 107.92 | 17.84 | 21 | 40 | 723  | 83.5  | 5.94 |
| Q15653 | NF-kappa-B inhibitor beta<br>OS=Homo sapiens<br>GN=NFKBIB<br>PE=1 SV=2 - [IKBB_HUMAN]                                       | 3.65  | 1 | 1  | 1  | 11 | 0.763 | 0.640 | 0.970 | 0.855 | 30.20  | 3.65  | 2  | 11 | 356  | 37.7  | 4.84 |
| Q9NXA8 | NAD-dependent protein deacylase sirtuin-5, mitochondrial<br>OS=Homo sapiens<br>GN=SIRT5<br>PE=1 SV=2 - [SIR5_HUMAN]         | 21.61 | 1 | 5  | 5  | 12 | 0.653 | 1.071 | 1.318 | 0.856 | 33.83  | 21.61 | 7  | 12 | 310  | 33.9  | 8.47 |
| Q6V1X1 | Dipeptidyl peptidase 8<br>OS=Homo sapiens<br>GN=DPP8<br>PE=1 SV=1 - [DPP8_HUMAN]                                            | 9.80  | 1 | 5  | 6  | 13 | 0.946 | 0.907 | 1.191 | 0.856 | 31.50  | 9.80  | 7  | 13 | 898  | 103.3 | 5.80 |
| Q99816 | Tumor susceptibility gene 101 protein<br>OS=Homo sapiens<br>GN=TSG101<br>PE=1 SV=2 - [TS101_HUMAN]                          | 17.18 | 1 | 7  | 7  | 25 | 0.991 | 1.080 | 1.184 | 0.856 | 62.04  | 17.18 | 11 | 25 | 390  | 43.9  | 6.46 |
| Q13724 | Mannosyl-oligosaccharide glucosidase<br>OS=Homo sapiens<br>GN=MOGS<br>PE=1 SV=5 - [MOGS_HUMAN]                              | 29.63 | 1 | 19 | 19 | 68 | 0.766 | 0.795 | 0.744 | 0.856 | 185.28 | 29.63 | 30 | 68 | 837  | 91.9  | 8.90 |
| Q9P2D0 | Inhibitor of Bruton tyrosine kinase<br>OS=Homo sapiens<br>GN=IBTK<br>PE=1 SV=3 - [IBTK_HUMAN]                               | 1.26  | 1 | 2  | 2  | 4  | 0.814 | 0.931 | 0.589 | 0.856 | 10.54  | 1.26  | 3  | 4  | 1353 | 150.4 | 7.71 |

|        |                                                                                                                   |       |   |    |    |    |       |       |       |       |        |       |    |    |      |       |      |
|--------|-------------------------------------------------------------------------------------------------------------------|-------|---|----|----|----|-------|-------|-------|-------|--------|-------|----|----|------|-------|------|
| O15427 | Monocarboxylate transporter<br>4 OS=Homo sapiens<br>GN=SLC16A3<br>PE=1 SV=1 - [MOT4_HUMAN]                        | 11.61 | 1 | 4  | 4  | 33 | 1.756 | 0.741 | 0.731 | 0.856 | 85.55  | 11.61 | 7  | 33 | 465  | 49.4  | 7.96 |
| O15372 | Eukaryotic translation initiation factor 3 subunit H<br>OS=Homo sapiens<br>GN=EIF3H<br>PE=1 SV=1 - [EIF3H_HUMAN]  | 27.56 | 1 | 10 | 10 | 32 | 0.768 | 0.680 | 0.657 | 0.856 | 80.44  | 27.56 | 15 | 32 | 352  | 39.9  | 6.54 |
| Q13425 | Beta-2-syntrophin<br>OS=Homo sapiens<br>GN=SNTB2<br>PE=1 SV=1 - [SNTB2_HUMAN]                                     | 37.96 | 3 | 17 | 20 | 70 | 1.158 | 1.073 | 1.141 | 0.856 | 137.56 | 37.96 | 32 | 70 | 540  | 57.9  | 8.82 |
| P84095 | Rho-related GTP-binding protein RhoG<br>OS=Homo sapiens<br>GN=RHOG<br>PE=1 SV=1 - [RHOG_HUMAN]                    | 51.31 | 2 | 8  | 9  | 41 | 1.063 | 1.083 | 0.857 | 0.856 | 97.09  | 51.31 | 16 | 41 | 191  | 21.3  | 8.12 |
| O43683 | Mitotic checkpoint serine/threonine-protein kinase BUB1<br>OS=Homo sapiens<br>GN=BUB1<br>PE=1 SV=1 - [BUB1_HUMAN] | 3.04  | 1 | 2  | 2  | 2  | 1.396 | 0.410 | 0.947 | 0.856 | 3.23   | 3.04  | 2  | 2  | 1085 | 122.3 | 6.47 |
| Q04941 | Proteolipid protein 2<br>OS=Homo sapiens<br>GN=PLP2 PE=1 SV=1 - [PLP2_HUMAN]                                      | 8.55  | 1 | 1  | 1  | 14 | 1.316 | 1.079 | 1.006 | 0.857 | 39.78  | 8.55  | 2  | 14 | 152  | 16.7  | 7.24 |
| Q93063 | Exostosin-2<br>OS=Homo sapiens<br>GN=EXT2<br>PE=1 SV=1 - [EXT2_HUMAN]                                             | 0.97  | 1 | 1  | 1  | 3  | 0.794 | 0.959 | 1.024 | 0.857 | 6.41   | 0.97  | 1  | 3  | 718  | 82.2  | 6.55 |
| Q8N2K0 | Monoacylglycerol lipase ABHD12<br>OS=Homo sapiens<br>GN=ABHD12<br>PE=1 SV=2 - [ABD12_HUMAN]                       | 22.11 | 1 | 8  | 8  | 19 | 0.776 | 1.286 | 1.075 | 0.857 | 54.95  | 22.11 | 11 | 19 | 398  | 45.1  | 8.65 |
| Q96S19 | UPF0585 protein C16orf13<br>OS=Homo sapiens<br>GN=C16orf13<br>PE=1 SV=2 - [CP013_HUMAN]                           | 32.84 | 1 | 6  | 6  | 14 | 0.818 | 1.139 | 1.088 | 0.857 | 33.66  | 32.84 | 10 | 14 | 204  | 22.6  | 7.83 |

|        |                                                                                                                                   |       |   |    |    |     |       |       |       |       |        |       |     |     |      |       |      |
|--------|-----------------------------------------------------------------------------------------------------------------------------------|-------|---|----|----|-----|-------|-------|-------|-------|--------|-------|-----|-----|------|-------|------|
| Q92616 | Translational activator GCN1 OS=Homo sapiens GN=GCN1L1 PE=1 SV=6 - [GCN1L_HUMAN]                                                  | 29.91 | 1 | 78 | 79 | 237 | 0.866 | 0.890 | 0.874 | 0.857 | 563.29 | 29.91 | 126 | 237 | 2671 | 292.6 | 7.47 |
| Q13555 | Calcium/calmodulin-dependent protein kinase type II subunit gamma OS=Homo sapiens GN=CAMK2G PE=1 SV=3 - [KCC2G_HUMAN]             | 16.85 | 3 | 3  | 10 | 35  | 1.708 | 1.257 | 1.636 | 0.857 | 79.83  | 16.85 | 13  | 35  | 558  | 62.6  | 7.83 |
| Q9BVT8 | Transmembrane and ubiquitin-like domain-containing protein 1 OS=Homo sapiens GN=TMUB1 PE=1 SV=1 - [TMUB1_HUMAN]                   | 8.94  | 1 | 2  | 2  | 6   | 0.876 | 0.982 | 1.061 | 0.857 | 14.02  | 8.94  | 3   | 6   | 246  | 26.2  | 5.72 |
| Q13155 | Aminoacyl tRNA synthase complex-interacting multifunctional protein 2 OS=Homo sapiens GN=AIMP2 PE=1 SV=2 - [AIMP2_HUMAN]          | 35.00 | 1 | 11 | 11 | 40  | 0.885 | 0.861 | 0.894 | 0.857 | 97.86  | 35.00 | 18  | 40  | 320  | 35.3  | 8.22 |
| Q6NUM9 | All-trans-retinol 13,14-reductase OS=Homo sapiens GN=RETSAT PE=1 SV=2 - [RETST_HUMAN]                                             | 24.75 | 1 | 16 | 16 | 44  | 1.277 | 0.801 | 1.071 | 0.857 | 100.95 | 24.75 | 28  | 44  | 610  | 66.8  | 8.28 |
| O00443 | Phosphatidylinositol 4-phosphate 3-kinase C2 domain-containing subunit alpha OS=Homo sapiens GN=PIK3C2A PE=1 SV=2 - [P3C2A_HUMAN] | 5.69  | 1 | 9  | 10 | 26  | 0.932 | 0.918 | 0.930 | 0.858 | 45.66  | 5.69  | 16  | 26  | 1686 | 190.6 | 8.02 |
| Q9HA77 | Probable cysteine--tRNA ligase, mitochondrial OS=Homo sapiens GN=CARS2 PE=1 SV=1 - [SYCM_HUMAN]                                   | 12.06 | 1 | 6  | 6  | 17  | 0.957 | 1.675 | 1.166 | 0.858 | 36.68  | 12.06 | 12  | 17  | 564  | 62.2  | 8.34 |
| Q13608 | Peroxisome assembly factor 2 OS=Homo sapiens GN=PEX6 PE=1 SV=2 - [PEX6_HUMAN]                                                     | 3.67  | 1 | 2  | 2  | 3   | 0.801 | 1.373 | 1.090 | 0.858 | 7.71   | 3.67  | 3   | 3   | 980  | 104.0 | 6.34 |

|        |                                                                                                                       |       |   |    |    |    |       |       |       |       |        |       |    |    |     |       |       |
|--------|-----------------------------------------------------------------------------------------------------------------------|-------|---|----|----|----|-------|-------|-------|-------|--------|-------|----|----|-----|-------|-------|
| Q12765 | Secernin-1<br>OS=Homo sapiens<br>GN=SCRN1<br>PE=1 SV=2 - [SCRN1_HUMAN]                                                | 51.69 | 1 | 16 | 16 | 92 | 0.943 | 0.823 | 0.923 | 0.858 | 229.26 | 51.69 | 26 | 92 | 414 | 46.4  | 4.75  |
| Q7Z7F7 | 39S ribosomal protein L55, mitochondrial<br>OS=Homo sapiens<br>GN=MRPL55<br>PE=1 SV=1 - [RM55_HUMAN]                  | 12.50 | 1 | 1  | 1  | 2  | 1.062 | 1.358 | 1.657 | 0.858 | 4.79   | 12.50 | 2  | 2  | 128 | 15.1  | 11.15 |
| Q01974 | Tyrosine-protein kinase transmembrane receptor<br>ROR2<br>OS=Homo sapiens<br>GN=ROR2<br>PE=1 SV=2 - [ROR2_HUMAN]      | 3.92  | 1 | 3  | 3  | 9  | 1.883 | 1.631 | 0.549 | 0.858 | 19.55  | 3.92  | 5  | 9  | 943 | 104.7 | 6.55  |
| P52824 | Diacylglycerol kinase theta<br>OS=Homo sapiens<br>GN=DGKQ<br>PE=1 SV=2 - [DGKQ_HUMAN]                                 | 0.96  | 1 | 1  | 1  | 2  | 0.871 | 1.024 | 1.428 | 0.858 | 3.93   | 0.96  | 1  | 2  | 942 | 101.1 | 7.49  |
| Q9NXU5 | ADP-ribosylation factor-like protein 15<br>OS=Homo sapiens<br>GN=ARL15<br>PE=1 SV=1 - [ARL15_HUMAN]                   | 4.41  | 1 | 1  | 1  | 4  | 0.536 | 0.867 | 0.922 | 0.858 | 9.71   | 4.41  | 2  | 4  | 204 | 22.9  | 5.63  |
| Q9HB20 | Pleckstrin homology domain-containing family A member 3<br>OS=Homo sapiens<br>GN=PLEKHA3<br>PE=1 SV=2 - [PKHA3_HUMAN] | 14.33 | 1 | 3  | 3  | 3  | 1.324 | 0.856 | 0.808 | 0.858 | 9.46   | 14.33 | 3  | 3  | 300 | 33.8  | 6.65  |
| Q7L5Y1 | Mitochondrial enolase superfamily member 1<br>OS=Homo sapiens<br>GN=ENOSF1<br>PE=1 SV=1 - [ENOF1_HUMAN]               | 4.29  | 1 | 2  | 2  | 6  | 1.039 | 0.945 | 0.658 | 0.858 | 11.19  | 4.29  | 3  | 6  | 443 | 49.8  | 6.48  |
| Q8N573 | Oxidation resistance protein 1<br>OS=Homo sapiens<br>GN=OXR1<br>PE=1 SV=2 - [OXR1_HUMAN]                              | 12.36 | 1 | 9  | 9  | 29 | 1.219 | 0.809 | 1.575 | 0.858 | 86.31  | 12.36 | 13 | 29 | 874 | 97.9  | 5.47  |



|        |                                                                                                                     |       |   |    |    |    |       |       |       |       |        |       |    |    |     |      |      |
|--------|---------------------------------------------------------------------------------------------------------------------|-------|---|----|----|----|-------|-------|-------|-------|--------|-------|----|----|-----|------|------|
| Q9BZG1 | Ras-related protein Rab-34<br>OS=Homo sapiens<br>GN=RAB34<br>PE=1 SV=1 - [RAB34_HUMAN]                              | 34.36 | 1 | 7  | 8  | 19 | 1.089 | 0.662 | 0.665 | 0.858 | 54.18  | 34.36 | 10 | 19 | 259 | 29.0 | 7.88 |
| Q8IWA0 | WD repeat-containing protein 75<br>OS=Homo sapiens<br>GN=WDR75<br>PE=1 SV=1 - [WDR75_HUMAN]                         | 2.29  | 1 | 1  | 1  | 3  | 0.826 | 1.023 | 0.928 | 0.858 | 9.15   | 2.29  | 2  | 3  | 830 | 94.4 | 5.96 |
| Q9NSB4 | Keratin, type II cuticular Hb2<br>OS=Homo sapiens<br>GN=KRT82<br>PE=1 SV=3 - [KRT82_HUMAN]                          | 5.65  | 1 | 3  | 3  | 3  | 1.192 | 0.824 | 0.834 | 0.858 | 7.49   | 5.65  | 3  | 3  | 513 | 56.6 | 6.74 |
| Q9BXY0 | Protein MAK16 homolog<br>OS=Homo sapiens<br>GN=MAK16<br>PE=1 SV=2 - [MAK16_HUMAN]                                   | 6.33  | 1 | 1  | 1  | 3  | 0.522 | 1.928 | 0.834 | 0.859 | 2.86   | 6.33  | 2  | 3  | 300 | 35.3 | 5.38 |
| O75718 | Cartilage-associated protein<br>OS=Homo sapiens<br>GN=CRTAP<br>PE=1 SV=1 - [CRTAP_HUMAN]                            | 39.65 | 1 | 16 | 16 | 82 | 0.735 | 0.636 | 0.737 | 0.859 | 210.81 | 39.65 | 26 | 82 | 401 | 46.5 | 5.73 |
| Q8TAD7 | Overexpressed in colon carcinoma 1 protein<br>OS=Homo sapiens<br>GN=OCC1<br>PE=1 SV=2 - [OCC1_HUMAN]                | 22.22 | 1 | 1  | 1  | 4  | 0.876 | 0.931 | 1.075 | 0.859 | 12.27  | 22.22 | 1  | 4  | 63  | 6.4  | 6.57 |
| Q9HBU1 | Homeobox protein BarH-like 1<br>OS=Homo sapiens<br>GN=BARX1<br>PE=1 SV=2 - [BARX1_HUMAN]                            | 5.91  | 1 | 1  | 1  | 1  | 0.974 | 1.002 | 2.712 | 0.859 | 0.00   | 5.91  | 1  | 1  | 254 | 27.3 | 9.70 |
| Q9NRG1 | Phosphoribosyltransferase domain-containing protein 1<br>OS=Homo sapiens<br>GN=PRTFDC1<br>PE=1 SV=1 - [PRDC1_HUMAN] | 9.33  | 1 | 2  | 2  | 7  | 1.270 | 0.963 | 0.570 | 0.859 | 15.47  | 9.33  | 4  | 7  | 225 | 25.7 | 6.15 |

|        |                                                                                                                                                               |       |   |     |     |      |       |       |       |       |         |       |     |      |      |       |       |
|--------|---------------------------------------------------------------------------------------------------------------------------------------------------------------|-------|---|-----|-----|------|-------|-------|-------|-------|---------|-------|-----|------|------|-------|-------|
| Q08188 | Protein-glutamine gamma-glutamyltransferase E<br>OS=Homo sapiens<br>GN=TGM3<br>PE=1 SV=4 - [TGM3_HUMAN]                                                       | 1.30  | 1 | 1   | 1   | 1    | 0.862 | 0.441 | 1.130 | 0.859 | 1.90    | 1.30  | 1   | 1    | 693  | 76.6  | 5.86  |
| Q9Y6Z5 | Putative uncharacterized protein<br>MLLT4-AS1<br>OS=Homo sapiens<br>GN=MLLT4-AS1<br>PE=5 SV=1 - [MLAS1_HUMAN]                                                 | 10.63 | 1 | 1   | 1   | 1    | 0.883 | 1.270 | 1.864 | 0.859 | 2.94    | 10.63 | 1   | 1    | 254  | 26.1  | 11.81 |
| O15382 | Branched-chain-amino-acid aminotransferase,<br>mitochondrial<br>OS=Homo sapiens<br>GN=BCAT2<br>PE=1 SV=2 - [BCAT2_HUMAN<br>Alpha-actinin-2<br>OS=Homo sapiens | 15.82 | 1 | 6   | 6   | 13   | 0.963 | 1.460 | 0.939 | 0.859 | 27.04   | 15.82 | 9   | 13   | 392  | 44.3  | 8.65  |
| P35609 | GN=ACTN2<br>PE=1 SV=1 - [ACTN2_HUMAN]                                                                                                                         | 20.36 | 1 | 1   | 22  | 541  | 1.171 | 0.998 | 1.170 | 0.859 | 1569.29 | 20.36 | 40  | 541  | 894  | 103.8 | 5.45  |
| P41162 | ETS translocation variant 3<br>OS=Homo sapiens<br>GN=ETV3<br>PE=1 SV=2 - [ETV3_HUMAN]                                                                         | 3.71  | 1 | 1   | 1   | 1    | 1.074 | 0.956 | 1.396 | 0.859 | 2.68    | 3.71  | 1   | 1    | 512  | 57.0  | 8.57  |
| P35579 | Myosin-9<br>OS=Homo sapiens<br>GN=MYH9<br>PE=1 SV=4 - [MYH9_HUMAN]                                                                                            | 73.98 | 1 | 182 | 223 | 5912 | 1.131 | 0.953 | 1.262 | 0.859 | #####   | 73.98 | 369 | 5912 | 1960 | 226.4 | 5.60  |
| Q8IXI2 | Mitochondrial Rho GTPase 1<br>OS=Homo sapiens<br>GN=RHOT1<br>PE=1 SV=2 - [MIRO1_HUMAN]                                                                        | 7.93  | 1 | 4   | 5   | 8    | 0.937 | 0.892 | 0.751 | 0.859 | 10.89   | 7.93  | 6   | 8    | 618  | 70.7  | 6.27  |
| O15037 | Protein KHNYN<br>OS=Homo sapiens<br>GN=KHNYN<br>PE=2 SV=3 - [KHNYN_HUMAN]                                                                                     | 4.42  | 1 | 2   | 2   | 2    | 1.007 | 0.696 | 0.931 | 0.860 | 1.94    | 4.42  | 2   | 2    | 678  | 74.5  | 7.02  |
| Q9H9Y6 | DNA-directed RNA polymerase I subunit RPA2<br>OS=Homo sapiens<br>GN=POLR1B<br>PE=1 SV=2 - [RPA2_HUMAN]                                                        | 0.97  | 1 | 1   | 1   | 2    | 0.707 | 0.737 | 0.805 | 0.860 | 3.44    | 0.97  | 2   | 2    | 1135 | 128.1 | 7.83  |

|        |                                                                                                                   |       |   |    |    |     |       |       |       |       |        |       |    |     |      |       |      |
|--------|-------------------------------------------------------------------------------------------------------------------|-------|---|----|----|-----|-------|-------|-------|-------|--------|-------|----|-----|------|-------|------|
| P48449 | Lanosterol synthase<br>OS=Homo sapiens<br>GN=LSS PE=1 SV=1 - [ERG7_HUMAN]                                         | 26.23 | 1 | 16 | 16 | 46  | 1.248 | 0.947 | 1.253 | 0.860 | 100.73 | 26.23 | 28 | 46  | 732  | 83.3  | 6.61 |
| Q9BRK3 | Matrix-remodeling-associated protein 8<br>OS=Homo sapiens<br>GN=MXRA8 PE=2 SV=1 - [MXRA8_HUMAN]                   | 19.46 | 1 | 8  | 9  | 33  | 0.586 | 0.666 | 0.926 | 0.860 | 76.54  | 19.46 | 16 | 33  | 442  | 49.1  | 7.23 |
| Q9Y2Y0 | ADP-ribosylation factor-like protein 2-binding protein<br>OS=Homo sapiens<br>GN=ARL2BP PE=1 SV=1 - [ARL2BP_HUMAN] | 17.18 | 1 | 3  | 3  | 13  | 0.772 | 0.915 | 0.975 | 0.860 | 26.07  | 17.18 | 6  | 13  | 163  | 18.8  | 4.35 |
| P34897 | Serine hydroxymethyltransferase, mitochondrial<br>OS=Homo sapiens<br>GN=SHMT2 PE=1 SV=3 - [GLYM_HUMAN]            | 40.08 | 1 | 18 | 19 | 105 | 0.775 | 1.093 | 0.846 | 0.860 | 280.09 | 40.08 | 34 | 105 | 504  | 56.0  | 8.53 |
| P63244 | Guanine nucleotide-binding protein subunit beta-2-like 1<br>OS=Homo sapiens<br>GN=GNB2L1 PE=1 SV=3 - [GBLP_HUMAN] | 60.57 | 1 | 16 | 16 | 108 | 0.748 | 0.728 | 0.712 | 0.860 | 308.73 | 60.57 | 25 | 108 | 317  | 35.1  | 7.69 |
| Q9NQG1 | Protein MANBAL<br>OS=Homo sapiens<br>GN=MANBAL PE=1 SV=1 - [MANBL_HUMAN]                                          | 9.41  | 1 | 1  | 1  | 1   | 1.002 | 0.730 | 0.660 | 0.860 | 1.89   | 9.41  | 1  | 1   | 85   | 9.5   | 9.16 |
| Q969M3 | Protein YIPF5<br>OS=Homo sapiens<br>GN=YIPF5 PE=1 SV=1 - [YIPF5_HUMAN]                                            | 8.17  | 1 | 2  | 2  | 7   | 0.674 | 0.653 | 0.724 | 0.860 | 13.51  | 8.17  | 3  | 7   | 257  | 28.0  | 4.36 |
| Q562F6 | Shugoshin-like 2<br>OS=Homo sapiens<br>GN=SGOL2 PE=1 SV=2 - [SGOL2_HUMAN]                                         | 0.55  | 1 | 1  | 1  | 1   | 1.287 | 1.266 | 0.738 | 0.860 | 1.96   | 0.55  | 1  | 1   | 1265 | 144.6 | 7.91 |
| P20742 | Pregnancy zone protein<br>OS=Homo sapiens<br>GN=PZP PE=1 SV=4 - [PZP_HUMAN]                                       | 2.56  | 1 | 2  | 3  | 15  | 1.278 | 0.951 | 1.491 | 0.860 | 32.01  | 2.56  | 4  | 15  | 1482 | 163.8 | 6.38 |

|        |                                                                                                                      |       |   |    |    |     |       |       |       |       |        |       |    |     |      |       |      |
|--------|----------------------------------------------------------------------------------------------------------------------|-------|---|----|----|-----|-------|-------|-------|-------|--------|-------|----|-----|------|-------|------|
| Q9GZQ3 | COMM domain-containing protein 5<br>OS=Homo sapiens<br>GN=COMMD5<br>PE=1 SV=1 - [COMMD5_HUMAN]                       | 16.96 | 1 | 4  | 4  | 9   | 0.983 | 0.846 | 0.827 | 0.861 | 20.43  | 16.96 | 5  | 9   | 224  | 24.7  | 7.02 |
| Q9NX58 | Cell growth-regulating nucleolar protein<br>OS=Homo sapiens<br>GN=LYAR PE=1 SV=2 - [LYAR_HUMAN]                      | 15.83 | 1 | 5  | 5  | 13  | 1.054 | 0.818 | 0.684 | 0.861 | 47.51  | 15.83 | 8  | 13  | 379  | 43.6  | 9.54 |
| Q6ZNI6 | Mitogen-activated protein kinase kinase kinase 15<br>OS=Homo sapiens<br>GN=MAP3K15<br>PE=1 SV=2 - [M3K15_HUMAN]      | 0.69  | 1 | 1  | 1  | 1   | 0.675 | 0.979 | 1.166 | 0.861 | 2.35   | 0.69  | 1  | 1   | 1313 | 147.3 | 5.63 |
| Q15181 | Inorganic pyrophosphatase<br>OS=Homo sapiens<br>GN=PPA1<br>PE=1 SV=2 - [IPYR_HUMAN]                                  | 64.36 | 1 | 18 | 20 | 108 | 0.967 | 0.693 | 0.666 | 0.861 | 251.64 | 64.36 | 34 | 108 | 289  | 32.6  | 5.86 |
| O00622 | Protein CYR61<br>OS=Homo sapiens<br>GN=CYR61<br>PE=1 SV=1 - [CYR61_HUMAN]                                            | 19.42 | 1 | 7  | 7  | 19  | 0.451 | 0.571 | 0.578 | 0.861 | 41.81  | 19.42 | 12 | 19  | 381  | 42.0  | 8.21 |
| Q9NXM4 | Ganglioside-induced differentiation-associated protein 2<br>OS=Homo sapiens<br>GN=GDAP2<br>PE=1 SV=1 - [GDAP2_HUMAN] | 4.02  | 1 | 2  | 2  | 3   | 1.263 | 3.046 | 1.405 | 0.861 | 6.21   | 4.02  | 3  | 3   | 497  | 56.2  | 5.74 |
| Q15785 | Mitochondrial import receptor subunit TOM34<br>OS=Homo sapiens<br>GN=TOMM34<br>PE=1 SV=2 - [TOM34_HUMAN]             | 32.04 | 1 | 7  | 8  | 32  | 0.816 | 1.112 | 1.073 | 0.861 | 78.28  | 32.04 | 12 | 32  | 309  | 34.5  | 8.98 |
| O95067 | G2/mitotic-specific cyclin-B2<br>OS=Homo sapiens<br>GN=CCNB2<br>PE=1 SV=1 - [CCNB2_HUMAN]                            | 1.51  | 1 | 1  | 1  | 1   | 0.684 | 1.468 | 1.096 | 0.861 | 1.83   | 1.51  | 1  | 1   | 398  | 45.3  | 8.90 |
| O14579 | Coatomer subunit epsilon<br>OS=Homo sapiens<br>GN=COPE<br>PE=1 SV=3 - [COPE_HUMAN]                                   | 25.32 | 1 | 10 | 10 | 37  | 0.896 | 0.741 | 0.707 | 0.862 | 87.44  | 25.32 | 17 | 37  | 308  | 34.5  | 5.12 |

|        |                                                                                                                                                                     |       |   |    |    |      |       |       |       |       |         |       |     |      |      |       |      |
|--------|---------------------------------------------------------------------------------------------------------------------------------------------------------------------|-------|---|----|----|------|-------|-------|-------|-------|---------|-------|-----|------|------|-------|------|
| Q8TDY2 | RB1-inducible<br>coiled-coil<br>protein 1<br>OS=Homo<br>sapiens<br>GN=RB1CC1<br>PE=1 SV=3 -<br>[RBCC1_HUMAN<br>]                                                    | 4.52  | 1 | 6  | 8  | 21   | 0.724 | 1.354 | 1.204 | 0.862 | 49.83   | 4.52  | 11  | 21   | 1594 | 183.0 | 5.41 |
| O43314 | Inositol<br>hexakisphospha<br>te and<br>diphosphoinosit<br>ol-<br>pentakisphosph<br>ate kinase 2<br>OS=Homo<br>sapiens<br>GN=PPIP5K2<br>PE=1 SV=3 -<br>[VIP2_HUMAN] | 10.78 | 1 | 6  | 13 | 25   | 0.783 | 0.951 | 1.019 | 0.862 | 64.29   | 10.78 | 18  | 25   | 1243 | 140.3 | 8.22 |
| Q8N4L2 | Type 2<br>phosphatidyino<br>sitol 4,5-<br>bisphosphate 4-<br>phosphatase<br>OS=Homo<br>sapiens<br>GN=TMEM55A<br>PE=1 SV=1 -<br>[TM55A_HUMA<br>N]                    | 3.89  | 1 | 1  | 1  | 1    | 0.648 | 0.369 | 0.616 | 0.862 | 0.00    | 3.89  | 1   | 1    | 257  | 28.1  | 8.68 |
| Q6P9B6 | TLD domain-<br>containing<br>protein 1<br>OS=Homo<br>sapiens<br>GN=TLDC1<br>PE=1 SV=2 -<br>[TLDC1_HUMAN<br>]                                                        | 18.20 | 1 | 6  | 6  | 24   | 0.992 | 0.964 | 1.146 | 0.862 | 56.98   | 18.20 | 8   | 24   | 456  | 51.0  | 6.24 |
| Q9BTW9 | Tubulin-specific<br>chaperone D<br>OS=Homo<br>sapiens<br>GN=TBDCD<br>PE=1 SV=2 -<br>[TBDCD_HUMAN]                                                                   | 12.75 | 1 | 13 | 13 | 44   | 0.829 | 0.803 | 0.833 | 0.862 | 110.95  | 12.75 | 21  | 44   | 1192 | 132.5 | 6.19 |
| P12814 | Alpha-actinin-1<br>OS=Homo<br>sapiens<br>GN=ACTN1<br>PE=1 SV=2 -<br>[ACTN1_HUMAN<br>]                                                                               | 70.07 | 1 | 42 | 71 | 2565 | 1.222 | 1.150 | 1.305 | 0.862 | 6757.28 | 70.07 | 122 | 2565 | 892  | 103.0 | 5.41 |
| Q9H579 | Protein MROH8<br>OS=Homo<br>sapiens<br>GN=MROH8<br>PE=2 SV=2 -<br>[MROH8_HUMA<br>N]                                                                                 | 1.45  | 1 | 1  | 1  | 2    | 1.050 | 0.699 | 0.648 | 0.862 | 4.65    | 1.45  | 1   | 2    | 483  | 54.8  | 6.40 |
| Q96FI4 | Endonuclease<br>8-like 1<br>OS=Homo<br>sapiens<br>GN=NEIL1<br>PE=1 SV=3 -<br>[NEIL1_HUMAN]                                                                          | 2.56  | 1 | 1  | 1  | 1    | 0.631 | 1.097 | 0.526 | 0.862 | 2.01    | 2.56  | 1   | 1    | 390  | 43.7  | 9.92 |
| Q14112 | Nidogen-2<br>OS=Homo<br>sapiens<br>GN=NID2 PE=1<br>SV=3 -<br>[NID2_HUMAN]                                                                                           | 8.95  | 1 | 9  | 11 | 17   | 0.504 | 1.375 | 0.811 | 0.863 | 44.31   | 8.95  | 16  | 17   | 1375 | 151.2 | 5.29 |

|        |                                                                                                                                                             |       |   |    |    |     |       |       |       |       |         |       |    |     |      |       |      |
|--------|-------------------------------------------------------------------------------------------------------------------------------------------------------------|-------|---|----|----|-----|-------|-------|-------|-------|---------|-------|----|-----|------|-------|------|
| Q9UBF2 | Coatmer subunit gamma-2 OS=Homo sapiens<br>GN=COPG2<br>PE=1 SV=1 - [COPG2_HUMAN]<br>Protein Wnt-8a OS=Homo sapiens<br>GN=WNT8A<br>PE=2 SV=2 - [WNT8A_HUMAN] | 13.43 | 1 | 8  | 10 | 21  | 0.912 | 1.011 | 0.848 | 0.863 | 55.86   | 13.43 | 16 | 21  | 871  | 97.6  | 5.81 |
| Q9HIJ5 | AP-1 complex subunit beta-1 OS=Homo sapiens<br>GN=AP1B1<br>PE=1 SV=2 - [AP1B1_HUMAN]                                                                        | 8.26  | 1 | 1  | 2  | 4   | 1.078 | 1.262 | 0.907 | 0.863 | 5.85    | 8.26  | 2  | 4   | 351  | 38.8  | 7.77 |
| Q10567 | Gamma-soluble NSF attachment protein OS=Homo sapiens<br>GN=NAPG<br>PE=1 SV=1 - [SNAG_HUMAN]                                                                 | 42.26 | 1 | 18 | 39 | 155 | 1.133 | 0.773 | 0.920 | 0.863 | 365.29  | 42.26 | 61 | 155 | 949  | 104.6 | 5.06 |
| Q99747 | Tubulin alpha-4A chain OS=Homo sapiens<br>GN=TUBA4A<br>PE=1 SV=1 - [TBA4A_HUMAN]                                                                            | 43.59 | 1 | 13 | 13 | 50  | 1.144 | 0.771 | 0.922 | 0.863 | 117.39  | 43.59 | 21 | 50  | 312  | 34.7  | 5.41 |
| P68366 | Macrophage erythroblast attacher OS=Homo sapiens<br>GN=MAEA<br>PE=1 SV=1 - [MAEA_HUMAN]                                                                     | 58.26 | 3 | 6  | 26 | 878 | 1.200 | 0.806 | 0.904 | 0.863 | 2412.49 | 58.26 | 45 | 878 | 448  | 49.9  | 5.06 |
| Q7L5Y9 | ELKS/Rab6-interacting/CAS T family member 1 OS=Homo sapiens<br>GN=ERC1<br>PE=1 SV=1 - [RBG12_HUMAN]                                                         | 7.83  | 1 | 4  | 4  | 14  | 1.004 | 0.624 | 0.737 | 0.863 | 48.16   | 7.83  | 6  | 14  | 396  | 45.3  | 8.69 |
| Q8IUD2 | Tether containing UBX domain for GLUT4 OS=Homo sapiens<br>GN=ASPC1<br>PE=1 SV=1 - [ASPC1_HUMAN]                                                             | 39.70 | 1 | 31 | 42 | 167 | 0.965 | 1.198 | 1.020 | 0.863 | 340.44  | 39.70 | 67 | 167 | 1116 | 128.0 | 5.97 |
| Q9BZE9 | Solute carrier family 12 member 2 OS=Homo sapiens<br>GN=SLC12A2<br>PE=1 SV=1 - [S12A2_HUMAN]                                                                | 17.18 | 1 | 8  | 8  | 27  | 0.973 | 0.923 | 1.034 | 0.863 | 60.50   | 17.18 | 13 | 27  | 553  | 60.1  | 6.64 |
| P55011 |                                                                                                                                                             | 8.42  | 1 | 7  | 8  | 25  | 0.742 | 1.108 | 0.842 | 0.863 | 56.62   | 8.42  | 13 | 25  | 1212 | 131.4 | 6.40 |

|        |                                                                                                                                                   |       |   |    |    |     |       |       |       |       |         |       |    |     |      |       |       |
|--------|---------------------------------------------------------------------------------------------------------------------------------------------------|-------|---|----|----|-----|-------|-------|-------|-------|---------|-------|----|-----|------|-------|-------|
| P78332 | RNA-binding<br>protein 6<br>OS=Homo<br>sapiens<br>GN=RBM6<br>PE=1 SV=5 -<br>[RBM6_HUMAN]                                                          | 1.51  | 1 | 1  | 2  | 5   | 1.205 | 1.370 | 1.308 | 0.863 | 10.23   | 1.51  | 3  | 5   | 1123 | 128.6 | 6.32  |
| Q96DA6 | Mitochondrial<br>import inner<br>membrane<br>translocase<br>subunit TIM14<br>OS=Homo<br>sapiens<br>GN=DNAJC19<br>PE=1 SV=3 -<br>[TIM14_HUMAN<br>] | 48.28 | 1 | 7  | 7  | 11  | 1.011 | 0.971 | 0.918 | 0.863 | 25.62   | 48.28 | 10 | 11  | 116  | 12.5  | 10.10 |
| O75822 | Eukaryotic<br>translation<br>initiation factor<br>3 subunit J<br>OS=Homo<br>sapiens<br>GN=EIF3J<br>PE=1 SV=2 -<br>[EIF3J_HUMAN]                   | 31.40 | 1 | 12 | 12 | 41  | 0.842 | 0.984 | 0.912 | 0.863 | 94.28   | 31.40 | 17 | 41  | 258  | 29.0  | 4.83  |
| Q14764 | Major vault<br>protein<br>OS=Homo<br>sapiens<br>GN=MVP PE=1<br>SV=4 -<br>[MVP_HUMAN]                                                              | 57.33 | 1 | 51 | 51 | 560 | 0.938 | 1.133 | 1.248 | 0.864 | 1381.47 | 57.33 | 86 | 560 | 893  | 99.3  | 5.48  |
| Q8WUW1 | Protein BRICK1<br>OS=Homo<br>sapiens<br>GN=BRK1<br>PE=1 SV=1 -<br>[BRK1_HUMAN]                                                                    | 54.67 | 1 | 4  | 5  | 13  | 0.963 | 0.849 | 0.961 | 0.864 | 24.17   | 54.67 | 8  | 13  | 75   | 8.7   | 5.45  |
| Q9NZ08 | Endoplasmic<br>reticulum<br>aminopeptidas<br>e 1 OS=Homo<br>sapiens<br>GN=ERAP1<br>PE=1 SV=3 -<br>[ERAP1_HUMAN<br>]                               | 16.79 | 1 | 17 | 17 | 68  | 1.282 | 0.872 | 0.708 | 0.864 | 189.86  | 16.79 | 27 | 68  | 941  | 107.2 | 6.46  |
| O95273 | Cylin-D1-<br>binding protein<br>1 OS=Homo<br>sapiens<br>GN=CCNDBP1<br>PE=1 SV=2 -<br>[CCDB1_HUMAN<br>]                                            | 8.33  | 1 | 3  | 3  | 17  | 0.932 | 0.709 | 0.979 | 0.864 | 42.51   | 8.33  | 4  | 17  | 360  | 40.2  | 4.82  |
| Q9UNE7 | E3 ubiquitin-<br>protein ligase<br>CHIP<br>OS=Homo<br>sapiens<br>GN=STUB1<br>PE=1 SV=2 -<br>[CHIP_HUMAN]                                          | 51.16 | 1 | 15 | 16 | 50  | 0.975 | 1.011 | 1.286 | 0.864 | 124.87  | 51.16 | 25 | 50  | 303  | 34.8  | 5.87  |
| P14679 | Tyrosinase<br>OS=Homo<br>sapiens<br>GN=TYR PE=1<br>SV=3 -<br>[TYRO_HUMAN]                                                                         | 3.21  | 1 | 2  | 2  | 2   | 0.703 | 0.841 | 0.818 | 0.864 | 2.69    | 3.21  | 2  | 2   | 529  | 60.4  | 6.11  |

|        |                                                                                                                                    |       |   |    |    |    |       |       |       |       |       |       |    |    |     |      |      |
|--------|------------------------------------------------------------------------------------------------------------------------------------|-------|---|----|----|----|-------|-------|-------|-------|-------|-------|----|----|-----|------|------|
| Q5VZB9 | Doublesex- and mab-3-related transcription factor A1<br>OS=Homo sapiens<br>GN=DMRTA1<br>PE=2 SV=1 - [DMRTA_HUMAN]                  | 5.75  | 1 | 1  | 1  | 1  | 0.903 | 0.997 | 0.898 | 0.864 | 2.16  | 5.75  | 1  | 1  | 504 | 53.1 | 8.90 |
| Q8IYB8 | ATP-dependent RNA helicase SUPV3L1, mitochondrial<br>OS=Homo sapiens<br>GN=SUPV3L1<br>PE=1 SV=1 - [SUV3_HUMAN]                     | 7.25  | 1 | 5  | 5  | 8  | 0.778 | 1.204 | 1.086 | 0.864 | 17.62 | 7.25  | 7  | 8  | 786 | 87.9 | 7.99 |
| O00442 | RNA 3'-terminal phosphate cyclase<br>OS=Homo sapiens<br>GN=RTCA<br>PE=1 SV=1 - [RTCA_HUMAN]                                        | 21.31 | 1 | 6  | 6  | 20 | 0.928 | 0.988 | 1.222 | 0.864 | 52.15 | 21.31 | 11 | 20 | 366 | 39.3 | 7.85 |
| P51668 | Ubiquitin-conjugating enzyme E2 D1<br>OS=Homo sapiens<br>GN=UBE2D1<br>PE=1 SV=1 - [UB2D1_HUMAN]                                    | 12.24 | 2 | 2  | 2  | 3  | 0.975 | 0.753 | 0.807 | 0.864 | 4.66  | 12.24 | 3  | 3  | 147 | 16.6 | 7.42 |
| P23743 | Dialcylglycerol kinase alpha<br>OS=Homo sapiens<br>GN=DGKA<br>PE=1 SV=3 - [DGKA_HUMAN]                                             | 23.95 | 1 | 14 | 14 | 33 | 1.054 | 1.033 | 1.422 | 0.864 | 92.89 | 23.95 | 20 | 33 | 735 | 82.6 | 6.73 |
| Q15842 | ATP-sensitive inward rectifier potassium channel 8<br>OS=Homo sapiens<br>GN=KCNJ8<br>PE=1 SV=1 - [KCNJ8_HUMAN]                     | 2.12  | 1 | 1  | 1  | 1  | 1.041 | 0.650 | 0.515 | 0.864 | 2.31  | 2.12  | 1  | 1  | 424 | 47.9 | 9.26 |
| P62699 | Protein yppeelike 5<br>OS=Homo sapiens<br>GN=YPEL5<br>PE=1 SV=1 - [YPEL5_HUMAN]                                                    | 23.97 | 1 | 3  | 3  | 7  | 1.034 | 0.779 | 1.013 | 0.865 | 17.96 | 23.97 | 5  | 7  | 121 | 13.8 | 7.31 |
| Q5TEU4 | NADH dehydrogenase [ubiquinone] 1 alpha subcomplex assembly factor 5<br>OS=Homo sapiens<br>GN=NDUFA5<br>PE=1 SV=1 - [NDUFA5_HUMAN] | 2.61  | 1 | 1  | 1  | 3  | 0.883 | 1.143 | 0.812 | 0.865 | 7.22  | 2.61  | 2  | 3  | 345 | 38.9 | 6.57 |



|        |                                                                                                             |       |   |    |    |     |       |       |       |       |        |       |    |     |      |       |      |
|--------|-------------------------------------------------------------------------------------------------------------|-------|---|----|----|-----|-------|-------|-------|-------|--------|-------|----|-----|------|-------|------|
| O75445 | Usherin<br>OS=Homo sapiens<br>GN=USH2A<br>PE=1 SV=3 - [USH2A_HUMAN]                                         | 0.40  | 1 | 2  | 2  | 4   | 0.962 | 0.727 | 1.166 | 0.865 | 8.02   | 0.40  | 2  | 4   | 5202 | 575.2 | 6.83 |
| Q8TF72 | Protein Shroom3<br>OS=Homo sapiens<br>GN=SHROOM3<br>PE=1 SV=2 - [SHRM3_HUMAN]                               | 8.57  | 1 | 13 | 13 | 45  | 0.575 | 1.155 | 1.618 | 0.865 | 120.05 | 8.57  | 20 | 45  | 1996 | 216.7 | 7.80 |
| Q13303 | Voltage-gated potassium channel subunit beta-2<br>OS=Homo sapiens<br>GN=KCNAB2<br>PE=1 SV=2 - [KCAB2_HUMAN] | 4.36  | 1 | 1  | 2  | 7   | 0.752 | 0.353 | 0.449 | 0.865 | 9.05   | 4.36  | 3  | 7   | 367  | 41.0  | 9.00 |
| P32856 | Syntaxin-2<br>OS=Homo sapiens<br>GN=STX2<br>PE=1 SV=3 - [STX2_HUMAN]                                        | 26.39 | 3 | 5  | 5  | 13  | 1.355 | 0.863 | 0.783 | 0.865 | 47.85  | 26.39 | 6  | 13  | 288  | 33.3  | 6.28 |
| Q5RI15 | Cytochrome c oxidase protein 20 homolog<br>OS=Homo sapiens<br>GN=COX20<br>PE=1 SV=2 - [COX20_HUMAN]         | 28.81 | 1 | 4  | 4  | 16  | 1.257 | 1.138 | 1.152 | 0.865 | 47.14  | 28.81 | 7  | 16  | 118  | 13.3  | 8.76 |
| Q969G6 | Riboflavin kinase<br>OS=Homo sapiens<br>GN=RFK PE=1 SV=2 - [RIFK_HUMAN]                                     | 12.90 | 1 | 3  | 3  | 8   | 0.714 | 0.938 | 0.819 | 0.865 | 18.64  | 12.90 | 5  | 8   | 155  | 17.6  | 8.13 |
| Q15366 | Poly(rC)-binding protein 2<br>OS=Homo sapiens<br>GN=PCBP2<br>PE=1 SV=1 - [PCBP2_HUMAN]                      | 38.90 | 1 | 5  | 11 | 136 | 0.641 | 0.745 | 0.803 | 0.865 | 358.66 | 38.90 | 19 | 136 | 365  | 38.6  | 6.79 |
| Q8IXM7 | Outer dense fiber protein 3-like protein 1<br>OS=Homo sapiens<br>GN=ODF3L1<br>PE=2 SV=1 - [OD3L1_HUMAN]     | 4.38  | 1 | 1  | 1  | 1   | 1.276 | 0.937 | 0.993 | 0.865 | 2.09   | 4.38  | 1  | 1   | 274  | 31.0  | 9.54 |
| P24666 | Low molecular weight phosphotyrosine phosphatase<br>OS=Homo sapiens<br>GN=ACP1<br>PE=1 SV=3 - [PPAC_HUMAN]  | 47.47 | 1 | 7  | 7  | 37  | 0.934 | 0.890 | 1.023 | 0.865 | 110.54 | 47.47 | 10 | 37  | 158  | 18.0  | 6.74 |

|        |                                                                                                                              |       |   |    |    |     |       |       |       |       |        |       |    |     |      |       |      |
|--------|------------------------------------------------------------------------------------------------------------------------------|-------|---|----|----|-----|-------|-------|-------|-------|--------|-------|----|-----|------|-------|------|
| O60493 | Sorting nexin-3<br>OS=Homo<br>sapiens<br>GN=SNX3<br>PE=1 SV=3 -<br>[SNX3_HUMAN]                                              | 46.91 | 1 | 9  | 10 | 85  | 0.915 | 0.913 | 1.045 | 0.865 | 291.57 | 46.91 | 18 | 85  | 162  | 18.8  | 8.66 |
| Q9NUJ3 | T-complex<br>protein 11-like<br>protein 1<br>OS=Homo<br>sapiens<br>GN=TCP11L1<br>PE=1 SV=1 -<br>[T11L1_HUMAN<br>]            | 9.23  | 1 | 4  | 4  | 11  | 0.951 | 1.387 | 1.334 | 0.866 | 25.40  | 9.23  | 7  | 11  | 509  | 57.0  | 5.59 |
| Q9UBK9 | Protein UXT<br>OS=Homo<br>sapiens<br>GN=UXT PE=1<br>SV=1 -<br>[UXT_HUMAN]                                                    | 14.01 | 1 | 2  | 2  | 5   | 0.869 | 0.836 | 0.762 | 0.866 | 11.96  | 14.01 | 4  | 5   | 157  | 18.2  | 7.59 |
| P20929 | Nebulin<br>OS=Homo<br>sapiens<br>GN=NEB PE=1<br>SV=5 -<br>[NEBU_HUMAN]                                                       | 2.11  | 1 | 8  | 11 | 15  | 1.219 | 0.758 | 0.931 | 0.866 | 26.05  | 2.11  | 12 | 15  | 6669 | 772.4 | 9.07 |
| Q16864 | V-type proton<br>ATPase subunit<br>F OS=Homo<br>sapiens<br>GN=ATP6V1F<br>PE=1 SV=2 -<br>[VATF_HUMAN]                         | 77.31 | 1 | 7  | 7  | 21  | 0.912 | 0.788 | 0.823 | 0.866 | 53.55  | 77.31 | 10 | 21  | 119  | 13.4  | 5.52 |
| P42566 | Epidermal<br>growth factor<br>receptor<br>substrate 15<br>OS=Homo<br>sapiens<br>GN=EPS15<br>PE=1 SV=2 -<br>[EPS15_HUMAN<br>] | 21.76 | 1 | 16 | 16 | 55  | 0.831 | 0.825 | 0.797 | 0.866 | 118.07 | 21.76 | 20 | 55  | 896  | 98.6  | 4.64 |
| P63010 | AP-2 complex<br>subunit beta<br>OS=Homo<br>sapiens<br>GN=AP2B1<br>PE=1 SV=1 -<br>[AP2B1_HUMAN<br>]                           | 46.00 | 1 | 24 | 46 | 232 | 0.974 | 0.853 | 0.899 | 0.866 | 533.87 | 46.00 | 72 | 232 | 937  | 104.5 | 5.38 |
| Q9NUQ9 | Protein<br>FAM49B<br>OS=Homo<br>sapiens<br>GN=FAM49B<br>PE=1 SV=1 -<br>[FA49B_HUMAN<br>]                                     | 18.83 | 2 | 6  | 7  | 40  | 0.942 | 1.076 | 1.087 | 0.866 | 100.46 | 18.83 | 12 | 40  | 324  | 36.7  | 6.06 |
| Q9NP95 | Fibroblast<br>growth factor<br>20 OS=Homo<br>sapiens<br>GN=FGF20<br>PE=1 SV=1 -<br>[FGF20_HUMAN<br>]                         | 5.69  | 1 | 1  | 1  | 1   | 1.334 | 0.975 | 0.839 | 0.866 | 0.00   | 5.69  | 1  | 1   | 211  | 23.5  | 8.76 |
| Q8N5M9 | Protein jagunal<br>homolog 1<br>OS=Homo<br>sapiens<br>GN=JAGN1<br>PE=1 SV=1 -<br>[JAGN1_HUMAN<br>]                           | 7.10  | 1 | 1  | 1  | 2   | 0.909 | 0.809 | 0.557 | 0.866 | 6.26   | 7.10  | 1  | 2   | 183  | 21.1  | 9.73 |

|        |                                                                                                                         |       |   |    |    |    |       |       |       |       |        |       |    |    |     |      |       |
|--------|-------------------------------------------------------------------------------------------------------------------------|-------|---|----|----|----|-------|-------|-------|-------|--------|-------|----|----|-----|------|-------|
| P18077 | 60S ribosomal protein L35a<br>OS=Homo sapiens<br>GN=RPL35A<br>PE=1 SV=2 - [RPL35A_HUMAN]                                | 58.18 | 1 | 10 | 10 | 46 | 0.678 | 0.738 | 0.584 | 0.866 | 104.93 | 58.18 | 16 | 46 | 110 | 12.5 | 11.06 |
| Q17RC7 | Exocyst complex component 3-like protein 4<br>OS=Homo sapiens<br>GN=EXOC3L4<br>PE=2 SV=2 - [EX3L4_HUMAN]                | 5.40  | 1 | 2  | 4  | 12 | 0.697 | 0.652 | 1.060 | 0.866 | 23.21  | 5.40  | 5  | 12 | 722 | 79.8 | 6.32  |
| P48556 | 26S proteasome non-ATPase regulatory subunit 8<br>OS=Homo sapiens<br>GN=PSMD8<br>PE=1 SV=2 - [PSMD8_HUMAN]              | 44.29 | 1 | 15 | 15 | 52 | 0.794 | 0.784 | 0.870 | 0.866 | 102.61 | 44.29 | 23 | 52 | 350 | 39.6 | 9.70  |
| Q9P035 | Very-long-chain (3R)-3-hydroxyacyl-CoA dehydratase 3<br>OS=Homo sapiens<br>GN=PTPLAD1<br>PE=1 SV=2 - [HACD3_HUMAN]      | 30.94 | 1 | 9  | 9  | 25 | 0.850 | 0.695 | 0.679 | 0.866 | 74.52  | 30.94 | 12 | 25 | 362 | 43.1 | 8.94  |
| Q86YR5 | G-protein-signaling modulator 1<br>OS=Homo sapiens<br>GN=GPSM1<br>PE=1 SV=2 - [GPSM1_HUMAN]                             | 18.07 | 2 | 12 | 12 | 26 | 0.808 | 0.937 | 1.176 | 0.866 | 73.76  | 18.07 | 17 | 26 | 675 | 74.5 | 6.54  |
| P09913 | Interferon-induced protein with tetratricopeptide repeats 2<br>OS=Homo sapiens<br>GN=IFIT2<br>PE=1 SV=1 - [IFIT2_HUMAN] | 14.62 | 1 | 6  | 7  | 18 | 7.902 | 1.273 | 1.647 | 0.867 | 45.63  | 14.62 | 10 | 18 | 472 | 54.6 | 6.76  |
| Q8N8R7 | ARL14 effector protein<br>OS=Homo sapiens<br>GN=ARL14EP<br>PE=1 SV=1 - [AL14E_HUMAN]                                    | 9.62  | 1 | 2  | 2  | 4  | 0.758 | 1.065 | 1.241 | 0.867 | 5.39   | 9.62  | 3  | 4  | 260 | 29.3 | 8.07  |
| Q15631 | Translin<br>OS=Homo sapiens<br>GN=TSN PE=1 SV=1 - [TSN_HUMAN]                                                           | 45.61 | 1 | 9  | 9  | 32 | 0.899 | 1.071 | 1.045 | 0.867 | 65.66  | 45.61 | 14 | 32 | 228 | 26.2 | 6.44  |

|        |                                                                                                                      |       |   |    |    |     |       |       |       |       |        |       |    |     |      |       |      |
|--------|----------------------------------------------------------------------------------------------------------------------|-------|---|----|----|-----|-------|-------|-------|-------|--------|-------|----|-----|------|-------|------|
| Q16706 | Alpha-mannosidase 2<br>OS=Homo sapiens<br>GN=MAN2A1<br>PE=1 SV=2 - [MA2A1_HUMAN]                                     | 10.58 | 1 | 11 | 11 | 32  | 0.823 | 0.642 | 0.735 | 0.867 | 69.77  | 10.58 | 17 | 32  | 1144 | 131.1 | 7.58 |
| Q9Y487 | V-type proton ATPase 116 kDa subunit a isoform 2<br>OS=Homo sapiens<br>GN=ATP6V0A2<br>PE=1 SV=2 - [VPP2_HUMAN]       | 4.67  | 1 | 5  | 5  | 9   | 0.820 | 0.674 | 0.649 | 0.867 | 21.87  | 4.67  | 6  | 9   | 856  | 98.0  | 6.61 |
| Q96K37 | Solute carrier family 35 member E1<br>OS=Homo sapiens<br>GN=SLC35E1<br>PE=1 SV=2 - [S35E1_HUMAN]                     | 13.41 | 1 | 3  | 3  | 4   | 1.429 | 0.920 | 0.666 | 0.867 | 3.24   | 13.41 | 3  | 4   | 410  | 44.7  | 9.79 |
| Q01968 | Inositol polyphosphate 5-phosphatase OCRL-1<br>OS=Homo sapiens<br>GN=OCRL<br>PE=1 SV=3 - [OCRL_HUMAN]                | 9.77  | 1 | 7  | 8  | 25  | 0.947 | 0.984 | 1.298 | 0.867 | 62.62  | 9.77  | 12 | 25  | 901  | 104.1 | 6.55 |
| O60299 | Leucine zipper putative tumor suppressor 3<br>OS=Homo sapiens<br>GN=LZTS3<br>PE=2 SV=1 - [LZTS3_HUMAN]               | 3.42  | 3 | 2  | 3  | 4   | 0.678 | 1.348 | 1.203 | 0.867 | 10.26  | 3.42  | 3  | 4   | 673  | 71.7  | 7.64 |
| Q9ULZ3 | Apoptosis-associated speck-like protein containing a CARD<br>OS=Homo sapiens<br>GN=PYCARD<br>PE=1 SV=2 - [ASC_HUMAN] | 37.95 | 2 | 7  | 7  | 25  | 1.108 | 1.643 | 0.678 | 0.867 | 64.04  | 37.95 | 12 | 25  | 195  | 21.6  | 6.34 |
| O14974 | Protein phosphatase 1 regulatory subunit 12A<br>OS=Homo sapiens<br>GN=PPP1R12A<br>PE=1 SV=1 - [MYPT1_HUMAN]          | 36.89 | 1 | 41 | 42 | 212 | 0.857 | 1.230 | 1.283 | 0.867 | 534.09 | 36.89 | 66 | 212 | 1030 | 115.2 | 5.40 |
| P22102 | Trifunctional purine biosynthetic protein adenosine-3<br>OS=Homo sapiens<br>GN=GART<br>PE=1 SV=1 - [PUR2_HUMAN]      | 22.67 | 1 | 22 | 22 | 85  | 0.788 | 1.008 | 0.903 | 0.868 | 214.60 | 22.67 | 38 | 85  | 1010 | 107.7 | 6.70 |

|        |                                                                                                                         |       |   |    |    |     |       |       |       |       |        |       |    |     |     |       |       |
|--------|-------------------------------------------------------------------------------------------------------------------------|-------|---|----|----|-----|-------|-------|-------|-------|--------|-------|----|-----|-----|-------|-------|
| P82921 | 28S ribosomal protein S21, mitochondrial<br>OS=Homo sapiens<br>GN=MRPS21<br>PE=1 SV=2 - [RT21_HUMAN]                    | 24.14 | 1 | 2  | 2  | 2   | 0.646 | 1.053 | 0.981 | 0.868 | 6.15   | 24.14 | 2  | 2   | 87  | 10.7  | 10.21 |
| O60645 | Exocyst complex component 3<br>OS=Homo sapiens<br>GN=EXOC3<br>PE=1 SV=2 - [EXOC3_HUMAN]                                 | 30.42 | 1 | 19 | 19 | 47  | 0.910 | 0.833 | 0.931 | 0.868 | 96.85  | 30.42 | 30 | 47  | 756 | 86.8  | 6.11  |
| Q8IXW5 | Putative RNA polymerase II subunit B1 CTD phosphatase RPAP2<br>OS=Homo sapiens<br>GN=RPAP2<br>PE=1 SV=1 - [RPAP2_HUMAN] | 8.33  | 1 | 4  | 4  | 7   | 1.070 | 1.065 | 0.836 | 0.868 | 18.38  | 8.33  | 4  | 7   | 612 | 69.5  | 7.78  |
| Q13614 | Myotubularin-related protein 2<br>OS=Homo sapiens<br>GN=MTMR2<br>PE=1 SV=4 - [MTMR2_HUMAN]                              | 3.73  | 2 | 2  | 4  | 13  | 0.592 | 1.164 | 1.051 | 0.868 | 24.03  | 3.73  | 6  | 13  | 643 | 73.3  | 7.40  |
| O95639 | Cleavage and polyadenylation specificity factor subunit 4<br>OS=Homo sapiens<br>GN=CPSF4<br>PE=1 SV=1 - [CPSF4_HUMAN]   | 7.81  | 1 | 2  | 2  | 5   | 0.953 | 0.902 | 1.403 | 0.868 | 8.56   | 7.81  | 3  | 5   | 269 | 30.2  | 8.31  |
| P50995 | Annexin A11<br>OS=Homo sapiens<br>GN=ANXA11<br>PE=1 SV=1 - [ANXA11_HUMAN]                                               | 44.75 | 1 | 25 | 26 | 228 | 1.016 | 1.332 | 1.323 | 0.868 | 563.09 | 44.75 | 45 | 228 | 505 | 54.4  | 7.65  |
| O60763 | General vesicular transport factor p115<br>OS=Homo sapiens<br>GN=USO1<br>PE=1 SV=2 - [USO1_HUMAN]                       | 45.95 | 1 | 40 | 41 | 226 | 0.861 | 0.953 | 0.927 | 0.868 | 605.52 | 45.95 | 62 | 226 | 962 | 107.8 | 4.91  |
| P63208 | S-phase kinase-associated protein 1<br>OS=Homo sapiens<br>GN=SKP1<br>PE=1 SV=2 - [SKP1_HUMAN]                           | 65.03 | 1 | 11 | 11 | 70  | 1.114 | 0.956 | 0.878 | 0.868 | 180.49 | 65.03 | 20 | 70  | 163 | 18.6  | 4.54  |

|        |                                                                                                                        |       |   |    |    |     |       |       |       |       |        |       |    |     |      |       |      |
|--------|------------------------------------------------------------------------------------------------------------------------|-------|---|----|----|-----|-------|-------|-------|-------|--------|-------|----|-----|------|-------|------|
| Q14146 | Unhealthy ribosome biogenesis protein 2 homolog<br>OS=Homo sapiens<br>GN=URB2<br>PE=2 SV=2 - [URB2_HUMAN]              | 2.17  | 1 | 2  | 2  | 2   | 0.851 | 1.270 | 1.003 | 0.868 | 2.97   | 2.17  | 2  | 2   | 1524 | 170.4 | 7.31 |
| Q9P2L0 | WD repeat-containing protein 35<br>OS=Homo sapiens<br>GN=WDR35<br>PE=1 SV=3 - [WDR35_HUMAN]                            | 2.71  | 1 | 2  | 2  | 11  | 1.119 | 0.755 | 0.892 | 0.869 | 3.44   | 2.71  | 2  | 11  | 1181 | 133.5 | 6.38 |
| Q9BSJ8 | Extended synaptotagmin-1<br>OS=Homo sapiens<br>GN=ESYT1<br>PE=1 SV=1 - [ESYT1_HUMAN]                                   | 37.50 | 1 | 34 | 34 | 156 | 1.392 | 1.455 | 1.204 | 0.869 | 372.64 | 37.50 | 49 | 156 | 1104 | 122.8 | 5.83 |
| Q9NPI6 | mRNA-decapping enzyme 1A<br>OS=Homo sapiens<br>GN=DCP1A<br>PE=1 SV=2 - [DCP1A_HUMAN]                                   | 7.39  | 1 | 3  | 3  | 8   | 1.168 | 1.046 | 0.976 | 0.869 | 15.97  | 7.39  | 6  | 8   | 582  | 63.3  | 6.25 |
| P20340 | Ras-related protein Rab-6A<br>OS=Homo sapiens<br>GN=RAB6A<br>PE=1 SV=3 - [RAB6A_HUMAN]                                 | 38.94 | 3 | 8  | 11 | 74  | 0.963 | 1.003 | 1.021 | 0.869 | 173.26 | 38.94 | 16 | 74  | 208  | 23.6  | 5.54 |
| Q9H4I3 | TraB domain-containing protein<br>OS=Homo sapiens<br>GN=TRABD<br>PE=1 SV=1 - [TRABD_HUMAN]                             | 14.36 | 1 | 4  | 4  | 6   | 0.898 | 0.767 | 0.744 | 0.869 | 23.46  | 14.36 | 5  | 6   | 376  | 42.3  | 8.00 |
| Q07973 | 1,25-dihydroxyvitamin D(3) 24-hydroxylase, mitochondrial<br>OS=Homo sapiens<br>GN=CYP24A1<br>PE=1 SV=2 - [CP24A_HUMAN] | 2.72  | 1 | 1  | 1  | 2   | 1.366 | 0.805 | 0.421 | 0.869 | 4.42   | 2.72  | 1  | 2   | 514  | 58.8  | 8.75 |
| Q7Z7E8 | Ubiquitin-conjugating enzyme E2 Q1<br>OS=Homo sapiens<br>GN=UBE2Q1<br>PE=1 SV=1 - [UB2Q1_HUMAN]                        | 9.24  | 1 | 4  | 4  | 11  | 0.845 | 0.870 | 0.931 | 0.869 | 21.51  | 9.24  | 6  | 11  | 422  | 46.1  | 5.10 |

|        |                                                                                                                    |       |   |    |    |    |       |       |       |       |        |       |    |    |      |       |      |
|--------|--------------------------------------------------------------------------------------------------------------------|-------|---|----|----|----|-------|-------|-------|-------|--------|-------|----|----|------|-------|------|
| Q9UUP5 | Uncharacterized protein<br>KIAA1107<br>OS=Homo sapiens<br>GN=KIAA1107<br>PE=1 SV=2 - [K1107_HUMAN]                 | 1.77  | 1 | 3  | 3  | 3  | 0.783 | 0.553 | 1.182 | 0.869 | 6.97   | 1.77  | 3  | 3  | 1409 | 155.6 | 6.19 |
| P28482 | Mitogen-activated protein kinase 1<br>OS=Homo sapiens<br>GN=MAPK1<br>PE=1 SV=3 - [MKO1_HUMAN]                      | 50.00 | 6 | 10 | 17 | 97 | 0.938 | 1.005 | 1.148 | 0.869 | 233.13 | 50.00 | 30 | 97 | 360  | 41.4  | 6.98 |
| Q6Y146 | Transmembrane protein 64<br>OS=Homo sapiens<br>GN=TMEM64<br>PE=1 SV=2 - [TMM64_HUMAN]                              | 9.74  | 1 | 1  | 1  | 1  | 1.082 | 1.185 | 1.549 | 0.869 | 2.21   | 9.74  | 1  | 1  | 380  | 39.6  | 8.41 |
| Q8TB61 | Adenosine 3'-phospho 5'-phosphosulfate transporter 1<br>OS=Homo sapiens<br>GN=SLC35B2<br>PE=1 SV=1 - [S35B2_HUMAN] | 6.94  | 1 | 4  | 4  | 10 | 1.084 | 0.906 | 0.969 | 0.869 | 19.69  | 6.94  | 7  | 10 | 432  | 47.5  | 9.16 |
| Q5T1M5 | FK506-binding protein 15<br>OS=Homo sapiens<br>GN=FKBP15<br>PE=1 SV=2 - [FKB15_HUMAN]                              | 15.50 | 1 | 18 | 18 | 64 | 0.929 | 1.096 | 0.848 | 0.869 | 172.48 | 15.50 | 28 | 64 | 1219 | 133.5 | 5.20 |
| Q12768 | WASH complex subunit strumpellin<br>OS=Homo sapiens<br>GN=KIAA0196<br>PE=1 SV=1 - [STRUM_HUMAN]                    | 20.71 | 1 | 20 | 20 | 49 | 1.097 | 0.772 | 0.831 | 0.869 | 100.97 | 20.71 | 29 | 49 | 1159 | 134.2 | 6.98 |
| P16083 | Ribosyl-dihydro nicotinamide dehydrogenase [quinone]<br>OS=Homo sapiens<br>GN=NQO2<br>PE=1 SV=5 - [NQO2_HUMAN]     | 40.69 | 1 | 8  | 8  | 28 | 0.866 | 0.569 | 0.467 | 0.869 | 94.86  | 40.69 | 13 | 28 | 231  | 25.9  | 6.29 |
| Q9BPX7 | UPF0415 protein C7orf25<br>OS=Homo sapiens<br>GN=C7orf25<br>PE=1 SV=1 - [CG025_HUMAN]                              | 5.23  | 2 | 3  | 3  | 9  | 0.727 | 0.580 | 0.639 | 0.869 | 18.15  | 5.23  | 3  | 9  | 421  | 46.4  | 6.42 |
| Q9UIW2 | Plexin-A1<br>OS=Homo sapiens<br>GN=PLXNA1<br>PE=1 SV=3 - [PLXA1_HUMAN]                                             | 3.96  | 2 | 3  | 8  | 26 | 1.060 | 0.842 | 1.241 | 0.870 | 50.13  | 3.96  | 13 | 26 | 1896 | 210.9 | 6.92 |

|        |                                                                                                                                                              |       |   |    |    |    |       |       |       |       |        |       |    |    |      |       |      |
|--------|--------------------------------------------------------------------------------------------------------------------------------------------------------------|-------|---|----|----|----|-------|-------|-------|-------|--------|-------|----|----|------|-------|------|
| Q7L5Z3 | Ras-related<br>GTP-binding<br>protein A<br>OS=Homo<br>sapiens<br>GN=RRAGA<br>PE=1 SV=1 -<br>[RRAGA_HUMAN<br>Uncharacterize<br>d protein<br>FLJ45252          | 12.46 | 2 | 3  | 4  | 14 | 0.866 | 0.907 | 1.098 | 0.870 | 31.95  | 12.46 | 7  | 14 | 313  | 36.5  | 7.72 |
| Q6ZSR9 | OS=Homo<br>sapiens PE=1<br>SV=2 -<br>[YJ005_HUMAN<br>]<br>Coiled-coil<br>domain-<br>containing<br>protein 102A                                               | 44.23 | 1 | 10 | 10 | 62 | 1.092 | 1.262 | 1.293 | 0.870 | 147.38 | 44.23 | 13 | 62 | 355  | 38.0  | 5.26 |
| Q96A19 | OS=Homo<br>sapiens<br>GN=CCDC102A<br>PE=1 SV=2 -<br>[C102A_HUMAN<br>]<br>Apolipoprotein<br>L2 OS=Homo<br>sapiens                                             | 7.45  | 1 | 3  | 5  | 11 | 1.059 | 1.635 | 1.264 | 0.870 | 22.25  | 7.45  | 7  | 11 | 550  | 62.6  | 5.58 |
| Q9BQE5 | GN=APO2<br>PE=1 SV=1 -<br>[APO2_HUMAN<br>]<br>Serine/threoni<br>ne-protein<br>phosphatase 6<br>regulatory<br>subunit 2                                       | 28.19 | 1 | 11 | 12 | 74 | 1.245 | 0.941 | 1.165 | 0.870 | 172.05 | 28.19 | 20 | 74 | 337  | 37.1  | 6.74 |
| O75170 | OS=Homo<br>sapiens<br>GN=PPP6R2<br>PE=1 SV=2 -<br>[PP6R2_HUMAN<br>]<br>SUN domain-<br>containing<br>protein 1                                                | 12.22 | 1 | 9  | 9  | 25 | 0.967 | 0.929 | 1.038 | 0.871 | 57.81  | 12.22 | 16 | 25 | 966  | 104.9 | 4.87 |
| O94901 | OS=Homo<br>sapiens<br>GN=SUN1<br>PE=1 SV=3 -<br>[SUN1_HUMAN]                                                                                                 | 27.83 | 1 | 16 | 17 | 41 | 1.309 | 1.000 | 0.989 | 0.871 | 99.77  | 27.83 | 25 | 41 | 812  | 90.0  | 7.08 |
| Q92817 | Envopla $\kappa$<br>OS=Homo<br>sapiens<br>GN=EVPL PE=1<br>SV=3 -<br>[EVPL_HUMAN]                                                                             | 3.84  | 2 | 4  | 9  | 15 | 1.046 | 1.246 | 1.891 | 0.871 | 25.06  | 3.84  | 10 | 15 | 2033 | 231.5 | 6.96 |
| Q9UBS8 | E3 ubiquitin-<br>protein ligase<br>RNF14<br>OS=Homo<br>sapiens<br>GN=RNF14<br>PE=1 SV=1 -<br>[RNF14_HUMAN<br>]<br>Charged<br>multivescular<br>body protein 6 | 6.33  | 1 | 3  | 3  | 10 | 0.980 | 0.749 | 0.836 | 0.871 | 24.26  | 6.33  | 4  | 10 | 474  | 53.8  | 4.75 |
| Q96FZ7 | OS=Homo<br>sapiens<br>GN=CHMP6<br>PE=1 SV=3 -<br>[CHMP6_HUMA<br>N]                                                                                           | 18.91 | 1 | 4  | 4  | 42 | 0.983 | 0.958 | 1.158 | 0.871 | 124.57 | 18.91 | 7  | 42 | 201  | 23.5  | 5.31 |



|        |                                                                                                                             |       |   |    |    |     |       |       |       |       |        |       |    |     |      |       |      |
|--------|-----------------------------------------------------------------------------------------------------------------------------|-------|---|----|----|-----|-------|-------|-------|-------|--------|-------|----|-----|------|-------|------|
| Q9NPD8 | Ubiquitin-conjugating enzyme E2 T<br>OS=Homo sapiens<br>GN=UBE2T<br>PE=1 SV=1 - [UBE2T_HUMAN]                               | 4.06  | 1 | 1  | 1  | 1   | 0.517 | 0.438 | 0.538 | 0.871 | 2.37   | 4.06  | 1  | 1   | 197  | 22.5  | 7.99 |
| O60669 | Monocarboxylate transporter 2<br>OS=Homo sapiens<br>GN=SLC16A7<br>PE=1 SV=2 - [MOT2_HUMAN]                                  | 3.77  | 1 | 2  | 2  | 9   | 1.097 | 1.207 | 1.004 | 0.871 | 21.59  | 3.77  | 3  | 9   | 478  | 52.2  | 9.31 |
| Q6ZS17 | Protein FAM65A<br>OS=Homo sapiens<br>GN=FAM65A<br>PE=1 SV=1 - [FAM65A_HUMAN]                                                | 9.08  | 1 | 10 | 10 | 20  | 0.914 | 0.903 | 0.960 | 0.871 | 45.20  | 9.08  | 16 | 20  | 1223 | 132.2 | 6.28 |
| P78537 | Biogenesis of lysosome-related organelles complex 1 subunit 1<br>OS=Homo sapiens<br>GN=BLOC1S1<br>PE=1 SV=2 - [BL1S1_HUMAN] | 38.56 | 1 | 5  | 6  | 13  | 0.878 | 1.035 | 1.054 | 0.871 | 30.34  | 38.56 | 8  | 13  | 153  | 17.3  | 9.33 |
| Q9HCD6 | Protein TANC2<br>OS=Homo sapiens<br>GN=TANC2<br>PE=1 SV=3 - [TANC2_HUMAN]                                                   | 0.95  | 1 | 2  | 2  | 2   | 0.873 | 1.198 | 1.039 | 0.871 | 0.00   | 0.95  | 2  | 2   | 1990 | 219.5 | 8.07 |
| Q9NY33 | Dipeptidyl peptidase 3<br>OS=Homo sapiens<br>GN=DPP3<br>PE=1 SV=2 - [DPP3_HUMAN]                                            | 39.76 | 1 | 26 | 26 | 101 | 1.015 | 0.869 | 0.885 | 0.871 | 246.32 | 39.76 | 40 | 101 | 737  | 82.5  | 5.10 |
| Q86UB9 | Transmembrane protein 135<br>OS=Homo sapiens<br>GN=TMEM135<br>PE=2 SV=2 - [TM135_HUMAN]                                     | 3.49  | 1 | 2  | 2  | 5   | 1.154 | 0.726 | 0.918 | 0.871 | 5.77   | 3.49  | 4  | 5   | 458  | 52.3  | 9.45 |
| P46734 | Dual specificity mitogen-activated protein kinase 3<br>OS=Homo sapiens<br>GN=MAP2K3<br>PE=1 SV=2 - [MP2K3_HUMAN]            | 39.19 | 2 | 13 | 13 | 32  | 0.540 | 0.786 | 0.953 | 0.872 | 73.13  | 39.19 | 21 | 32  | 347  | 39.3  | 7.43 |
| P25789 | Proteasome subunit alpha type-4<br>OS=Homo sapiens<br>GN=PSMA4<br>PE=1 SV=1 - [PSA4_HUMAN]                                  | 55.17 | 2 | 14 | 14 | 73  | 0.915 | 0.846 | 0.795 | 0.872 | 182.08 | 55.17 | 18 | 73  | 261  | 29.5  | 7.72 |

|        |                                                                                                       |       |   |    |    |    |       |       |       |       |        |       |    |    |      |       |      |
|--------|-------------------------------------------------------------------------------------------------------|-------|---|----|----|----|-------|-------|-------|-------|--------|-------|----|----|------|-------|------|
| Q99598 | Translin-associated protein X<br>OS=Homo sapiens<br>GN=TSNAX<br>PE=1 SV=1 - [TSNAX_HUMAN]             | 30.34 | 1 | 7  | 7  | 18 | 0.797 | 1.172 | 0.952 | 0.872 | 49.91  | 30.34 | 10 | 18 | 290  | 33.1  | 6.55 |
| Q16850 | Lanosterol 14-alpha demethylase<br>OS=Homo sapiens<br>GN=CYP51A1<br>PE=1 SV=3 - [CPS1A_HUMAN]         | 11.13 | 1 | 6  | 6  | 11 | 0.678 | 0.574 | 0.886 | 0.872 | 28.74  | 11.13 | 9  | 11 | 503  | 56.8  | 8.53 |
| Q4G0P3 | Hydrocephalus-inducing protein homolog<br>OS=Homo sapiens<br>GN=HYDIN<br>PE=1 SV=3 - [HYDIN_HUMAN]    | 0.70  | 1 | 4  | 4  | 4  | 1.014 | 0.708 | 0.531 | 0.872 | 5.30   | 0.70  | 4  | 4  | 5121 | 575.5 | 6.06 |
| Q8IU1F | COBW domain-containing protein 2<br>OS=Homo sapiens<br>GN=CBWD2<br>PE=1 SV=1 - [CBWD2_HUMAN]          | 8.35  | 6 | 3  | 3  | 7  | 0.977 | 1.094 | 1.161 | 0.873 | 16.99  | 8.35  | 4  | 7  | 395  | 44.0  | 4.89 |
| P84022 | Mothers against decapentaplegic homolog 3<br>OS=Homo sapiens<br>GN=SMAD3<br>PE=1 SV=1 - [SMAD3_HUMAN] | 12.47 | 2 | 5  | 5  | 18 | 1.060 | 0.972 | 1.153 | 0.873 | 49.92  | 12.47 | 10 | 18 | 425  | 48.0  | 7.15 |
| O43255 | E3 ubiquitin-protein ligase SIAH2<br>OS=Homo sapiens<br>GN=SIAH2<br>PE=1 SV=1 - [SIAH2_HUMAN]         | 2.47  | 1 | 1  | 1  | 1  | 0.725 | 0.835 | 0.993 | 0.873 | 0.00   | 2.47  | 1  | 1  | 324  | 34.6  | 7.12 |
| P21397 | Amine oxidase [flavin-containing] A<br>OS=Homo sapiens<br>GN=MAOA<br>PE=1 SV=1 - [AOFA_HUMAN]         | 42.13 | 1 | 16 | 19 | 69 | 0.682 | 0.981 | 0.521 | 0.873 | 179.82 | 42.13 | 32 | 69 | 527  | 59.6  | 7.85 |
| Q5T6V5 | UPF0553 protein C9orf64<br>OS=Homo sapiens<br>GN=C9orf64<br>PE=1 SV=1 - [C1064_HUMAN]                 | 5.57  | 1 | 2  | 2  | 9  | 0.935 | 0.690 | 0.724 | 0.873 | 18.73  | 5.57  | 4  | 9  | 341  | 39.0  | 5.88 |
| Q8WUP2 | Filamin-binding LIM protein 1<br>OS=Homo sapiens<br>GN=FBLM1<br>PE=1 SV=2 - [FBLI1_HUMAN]             | 12.60 | 1 | 6  | 6  | 28 | 1.053 | 0.925 | 1.560 | 0.873 | 76.24  | 12.60 | 11 | 28 | 373  | 40.6  | 6.02 |

|        |                                                                                                                                                                |       |   |   |   |    |       |       |       |       |       |       |   |    |      |       |      |
|--------|----------------------------------------------------------------------------------------------------------------------------------------------------------------|-------|---|---|---|----|-------|-------|-------|-------|-------|-------|---|----|------|-------|------|
| Q7L592 | NADH dehydrogenase [ubiquinone] complex I, assembly factor<br>7 OS=Homo sapiens<br>GN=NDUFAF7<br>PE=1 SV=1 - [NDUF7_HUMAN]                                     | 12.47 | 1 | 4 | 4 | 8  | 0.940 | 1.130 | 0.871 | 0.873 | 11.08 | 12.47 | 5 | 8  | 441  | 49.2  | 8.34 |
| P51587 | Breast cancer type 2 susceptibility protein<br>OS=Homo sapiens<br>GN=BRCA2<br>PE=1 SV=2 - [BRCA2_HUMAN]                                                        | 0.47  | 1 | 2 | 2 | 2  | 1.666 | 1.396 | 1.376 | 0.873 | 5.44  | 0.47  | 2 | 2  | 3418 | 384.0 | 6.73 |
| A4D0S4 | Laminin subunit beta-4<br>OS=Homo sapiens<br>GN=LAMB4<br>PE=2 SV=1 - [LAMB4_HUMAN]                                                                             | 0.91  | 1 | 1 | 1 | 1  | 2.809 | 1.022 | 0.611 | 0.873 | 2.75  | 0.91  | 1 | 1  | 1761 | 193.4 | 6.35 |
| Q9Y287 | Integral membrane protein 2B<br>OS=Homo sapiens<br>GN=ITM2B<br>PE=1 SV=1 - [ITM2B_HUMAN]                                                                       | 3.76  | 1 | 1 | 1 | 3  | 0.938 | 0.387 | 0.847 | 0.874 | 7.81  | 3.76  | 1 | 3  | 266  | 30.3  | 5.14 |
| Q9NUQ7 | Ufm1-specific protease 2<br>OS=Homo sapiens<br>GN=UFSP2<br>PE=1 SV=3 - [UFSP2_HUMAN]                                                                           | 19.62 | 1 | 5 | 5 | 15 | 1.148 | 1.073 | 0.866 | 0.874 | 29.28 | 19.62 | 8 | 15 | 469  | 53.2  | 7.01 |
| Q9NQH7 | Probable Xaa-Pro aminopeptidase 3<br>OS=Homo sapiens<br>GN=XPNPEP3<br>PE=1 SV=1 - [XPP3_HUMAN]                                                                 | 4.73  | 1 | 2 | 2 | 3  | 1.352 | 0.934 | 1.212 | 0.874 | 5.92  | 4.73  | 3 | 3  | 507  | 57.0  | 6.83 |
| Q15011 | Homocysteine-responsive endoplasmic reticulum-resident ubiquitin-like domain member 1<br>protein<br>OS=Homo sapiens<br>GN=HERPUD1<br>PE=1 SV=1 - [HERP1_HUMAN] | 3.84  | 1 | 1 | 2 | 6  | 0.545 | 0.595 | 0.710 | 0.874 | 6.65  | 3.84  | 3 | 6  | 391  | 43.7  | 5.25 |
| Q9UBX5 | Fibulin-5<br>OS=Homo sapiens<br>GN=FBLN5<br>PE=1 SV=1 - [FBLN5_HUMAN]                                                                                          | 4.69  | 1 | 2 | 2 | 5  | 0.675 | 0.381 | 0.697 | 0.874 | 10.85 | 4.69  | 3 | 5  | 448  | 50.1  | 4.73 |

|        |                                                                                                                      |       |   |    |    |    |       |       |       |       |        |       |    |    |      |       |      |
|--------|----------------------------------------------------------------------------------------------------------------------|-------|---|----|----|----|-------|-------|-------|-------|--------|-------|----|----|------|-------|------|
| Q14689 | Disco-interacting protein 2 homolog A<br>OS=Homo sapiens<br>GN=DIP2A<br>PE=1 SV=2 - [DIP2A_HUMAN]                    | 3.44  | 1 | 3  | 5  | 7  | 0.740 | 0.979 | 0.938 | 0.874 | 17.73  | 3.44  | 7  | 7  | 1571 | 170.3 | 8.03 |
| Q15811 | Intersectin-1<br>OS=Homo sapiens<br>GN=ITSN1<br>PE=1 SV=3 - [ITSN1_HUMAN]                                            | 12.38 | 1 | 15 | 19 | 40 | 1.082 | 0.977 | 1.033 | 0.874 | 92.32  | 12.38 | 27 | 40 | 1721 | 195.3 | 7.77 |
| O15145 | Actin-related protein 2/3 complex subunit 3<br>OS=Homo sapiens<br>GN=ARPC3<br>PE=1 SV=3 - [ARPC3_HUMAN]              | 24.72 | 1 | 5  | 5  | 12 | 0.970 | 0.917 | 0.958 | 0.874 | 30.71  | 24.72 | 8  | 12 | 178  | 20.5  | 8.59 |
| P23588 | Eukaryotic translation initiation factor 4B<br>OS=Homo sapiens<br>GN=EIF4B<br>PE=1 SV=2 - [IF4B_HUMAN]               | 34.37 | 1 | 20 | 20 | 78 | 0.860 | 0.897 | 0.807 | 0.874 | 138.62 | 34.37 | 31 | 78 | 611  | 69.1  | 5.73 |
| P59095 | StAR-related lipid transfer protein 6<br>OS=Homo sapiens<br>GN=STARD6<br>PE=1 SV=1 - [STAR6_HUMAN]                   | 3.64  | 1 | 1  | 1  | 2  | 1.945 | 1.872 | 1.250 | 0.874 | 1.75   | 3.64  | 1  | 2  | 220  | 25.0  | 9.32 |
| Q13526 | Peptidyl-prolyl isomerase NIMA-interacting 1<br>OS=Homo sapiens<br>GN=PINI PE=1 SV=1 - [PIN1_HUMAN]                  | 48.47 | 1 | 6  | 6  | 27 | 1.046 | 1.059 | 1.205 | 0.874 | 52.05  | 48.47 | 8  | 27 | 163  | 18.2  | 8.82 |
| Q3ZAQ7 | Vacuolar ATPase assembly integral membrane protein VMA21<br>OS=Homo sapiens<br>GN=VMA21<br>PE=1 SV=1 - [VMA21_HUMAN] | 11.88 | 1 | 1  | 1  | 7  | 0.870 | 0.760 | 0.851 | 0.875 | 19.22  | 11.88 | 2  | 7  | 101  | 11.3  | 7.24 |
| P60508 | Synctin-2<br>OS=Homo sapiens<br>GN=ERVFRD-1<br>PE=1 SV=1 - [SYCY2_HUMAN]                                             | 1.86  | 1 | 1  | 1  | 1  | 0.597 | 1.186 | 1.232 | 0.875 | 2.19   | 1.86  | 1  | 1  | 538  | 59.5  | 8.85 |

|        |                                                                                                                                                                   |       |   |    |    |     |       |       |       |       |         |       |    |     |      |       |      |
|--------|-------------------------------------------------------------------------------------------------------------------------------------------------------------------|-------|---|----|----|-----|-------|-------|-------|-------|---------|-------|----|-----|------|-------|------|
| Q8WVPS | Tumor necrosis factor alpha-induced protein 8-like protein 1<br>OS=Homo sapiens<br>GN=TNFAIP8L1<br>PE=2 SV=2 - [TP8L1_HUMAN<br>Signal peptidase complex subunit 2 | 4.30  | 2 | 1  | 1  | 2   | 0.445 | 1.589 | 0.820 | 0.875 | 2.78    | 4.30  | 1  | 2   | 186  | 20.8  | 9.50 |
| Q15005 | OS=Homo sapiens<br>GN=SPCS2<br>PE=1 SV=3 - [SPCS2_HUMAN<br>Roquin-2                                                                                               | 48.67 | 1 | 15 | 15 | 52  | 0.863 | 0.757 | 0.769 | 0.875 | 147.08  | 48.67 | 18 | 52  | 226  | 25.0  | 8.47 |
| Q9HBD1 | OS=Homo sapiens<br>GN=RC3H2<br>PE=1 SV=2 - [RC3H2_HUMAN<br>] Axonemal dynein light chain domain-containing protein 1                                              | 4.95  | 1 | 3  | 3  | 4   | 0.729 | 0.564 | 1.268 | 0.875 | 7.21    | 4.95  | 4  | 4   | 1191 | 131.6 | 6.89 |
| Q5T1B0 | OS=Homo sapiens<br>GN=AXDND1<br>PE=2 SV=1 - [AXDND1_HUMAN<br>] 14-3-3 protein epsilon                                                                             | 1.09  | 1 | 1  | 1  | 1   | 1.695 | 0.817 | 0.956 | 0.875 | 1.92    | 1.09  | 1  | 1   | 1012 | 118.0 | 5.68 |
| P62258 | OS=Homo sapiens<br>GN=YWHAE<br>PE=1 SV=1 - [1433E_HUMAN<br>] Uncharacterized protein C1orf101                                                                     | 69.41 | 1 | 21 | 24 | 320 | 1.200 | 1.074 | 0.986 | 0.875 | 1013.79 | 69.41 | 38 | 320 | 255  | 29.2  | 4.74 |
| Q5SY80 | OS=Homo sapiens<br>GN=C1orf101<br>PE=2 SV=1 - [CA101_HUMAN<br>] RUS1 family protein C16orf58                                                                      | 1.89  | 1 | 1  | 1  | 2   | 1.516 | 1.360 | 1.311 | 0.875 | 2.28    | 1.89  | 1  | 2   | 951  | 109.6 | 7.27 |
| Q96GQ5 | OS=Homo sapiens<br>GN=C16orf58<br>PE=1 SV=2 - [RUS1_HUMAN<br>] G-protein coupled receptor 39                                                                      | 27.14 | 1 | 11 | 11 | 41  | 1.008 | 1.007 | 0.844 | 0.875 | 94.72   | 27.14 | 18 | 41  | 468  | 51.0  | 6.93 |
| O43194 | OS=Homo sapiens<br>GN=GPR39<br>PE=1 SV=1 - [GPR39_HUMAN<br>] Focal adhesion kinase 1                                                                              | 1.55  | 1 | 1  | 1  | 3   | 0.586 | 0.731 | 0.927 | 0.875 | 7.30    | 1.55  | 1  | 3   | 453  | 51.3  | 9.29 |
| Q05397 | OS=Homo sapiens<br>GN=PTK2<br>PE=1 SV=2 - [FAK1_HUMAN<br>]                                                                                                        | 15.78 | 1 | 12 | 14 | 39  | 0.943 | 1.207 | 0.964 | 0.875 | 88.93   | 15.78 | 21 | 39  | 1052 | 119.2 | 6.62 |

|        |                                                                                                                                                                                                                                           |       |   |    |    |     |       |       |       |       |         |       |    |     |      |       |      |
|--------|-------------------------------------------------------------------------------------------------------------------------------------------------------------------------------------------------------------------------------------------|-------|---|----|----|-----|-------|-------|-------|-------|---------|-------|----|-----|------|-------|------|
| Q7KZF4 | Staphylococcal<br>nuclease<br>domain-<br>containing<br>protein 1<br>OS=Homo<br>sapiens<br>GN=SND1<br>PE=1 SV=1 -<br>[SND1_HUMAN]<br>Poly(rC)-<br>binding protein<br>3 OS=Homo<br>sapiens<br>GN=PCBP3<br>PE=2 SV=2 -<br>[PCBP3_HUMAN]<br>] | 54.95 | 1 | 51 | 52 | 344 | 0.796 | 0.821 | 0.949 | 0.875 | 897.03  | 54.95 | 84 | 344 | 910  | 101.9 | 7.17 |
| P57721 | Cullin-7<br>OS=Homo<br>sapiens<br>GN=CUL7 PE=1<br>SV=2 -<br>[CUL7_HUMAN]                                                                                                                                                                  | 17.52 | 1 | 1  | 6  | 121 | 0.618 | 0.526 | 0.434 | 0.875 | 326.04  | 17.52 | 12 | 121 | 371  | 39.4  | 8.07 |
| Q14999 | Nitric oxide<br>synthase,<br>endothelial<br>OS=Homo<br>sapiens<br>GN=NOS3<br>PE=1 SV=3 -<br>[NOS3_HUMAN]                                                                                                                                  | 5.59  | 1 | 6  | 7  | 15  | 1.008 | 0.974 | 0.914 | 0.875 | 39.14   | 5.59  | 11 | 15  | 1698 | 191.0 | 5.87 |
| P29474 | Leucine-rich<br>repeat and IQ<br>domain-<br>containing<br>protein 1<br>OS=Homo<br>sapiens<br>GN=LRR1Q1<br>PE=2 SV=3 -<br>[LRR1Q1_HUMAN]<br>]                                                                                              | 1.16  | 1 | 2  | 2  | 5   |       |       |       | 0.875 | 8.13    | 1.16  | 3  | 5   | 1203 | 133.2 | 7.27 |
| Q96JM4 | Protein S100-<br>A6 OS=Homo<br>sapiens<br>GN=S100A6<br>PE=1 SV=1 -<br>[S100A6_HUMAN]<br>]                                                                                                                                                 | 1.34  | 1 | 2  | 3  | 7   | 1.169 | 0.845 |       | 0.876 | 17.95   | 1.34  | 3  | 7   | 1722 | 199.2 | 6.19 |
| P06703 | G protein<br>pathway<br>suppressor 2<br>OS=Homo<br>sapiens<br>GN=GPS2<br>PE=1 SV=3 -<br>[GPS2_HUMAN]                                                                                                                                      | 80.00 | 1 | 12 | 12 | 581 | 1.495 | 0.994 | 0.842 | 0.876 | 1208.76 | 80.00 | 19 | 581 | 90   | 10.2  | 5.48 |
| Q13227 | Flotillin-2<br>OS=Homo<br>sapiens<br>GN=FLOT2<br>PE=1 SV=2 -<br>[FLOT2_HUMAN]<br>]                                                                                                                                                        | 2.45  | 1 | 1  | 1  | 3   | 1.511 | 1.815 | 1.126 | 0.876 | 2.07    | 2.45  | 1  | 3   | 327  | 36.7  | 9.52 |
| Q14254 | Dolichyl-<br>diphosphooligo<br>saccharide--<br>protein<br>glycosyltransfer<br>ase 48 kDa<br>subunit<br>OS=Homo<br>sapiens<br>GN=DDOST<br>PE=1 SV=4 -<br>[OST48_HUMAN]<br>N]                                                               | 40.42 | 1 | 18 | 18 | 61  | 1.076 | 1.249 | 1.135 | 0.876 | 162.86  | 40.42 | 29 | 61  | 428  | 47.0  | 5.25 |
| P39656 |                                                                                                                                                                                                                                           | 37.50 | 1 | 16 | 16 | 42  | 0.748 | 0.800 | 0.661 | 0.876 | 101.22  | 37.50 | 24 | 42  | 456  | 50.8  | 6.55 |

|        |                                                                                                                      |       |   |   |    |      |       |       |       |       |         |       |    |      |     |       |      |
|--------|----------------------------------------------------------------------------------------------------------------------|-------|---|---|----|------|-------|-------|-------|-------|---------|-------|----|------|-----|-------|------|
| A6NH57 | Putative ADP-ribosylation factor-like protein 5C<br>OS=Homo sapiens<br>GN=ARL5C<br>PE=2 SV=4 - [ARL5C_HUMAN]         | 10.06 | 1 | 1 | 1  | 1    | 1.535 | 1.954 | 1.524 | 0.876 | 0.00    | 10.06 | 1  | 1    | 179 | 20.6  | 5.72 |
| P61081 | NEDD8-conjugating enzyme Ubc12<br>OS=Homo sapiens<br>GN=UBE2M<br>PE=1 SV=1 - [UBC12_HUMAN]                           | 36.07 | 1 | 8 | 8  | 38   | 0.934 | 0.999 | 0.879 | 0.876 | 81.20   | 36.07 | 15 | 38   | 183 | 20.9  | 7.69 |
| P57103 | Sodium/calcium exchanger 3<br>OS=Homo sapiens<br>GN=SLC8A3<br>PE=2 SV=2 - [NAC3_HUMAN]                               | 2.80  | 1 | 2 | 2  | 2    | 0.725 | 1.019 | 2.204 | 0.876 | 2.86    | 2.80  | 2  | 2    | 927 | 102.9 | 5.12 |
| Q93015 | N-acetyltransferase 6<br>OS=Homo sapiens<br>GN=NAT6<br>PE=2 SV=2 - [NAT6_HUMAN]                                      | 11.89 | 1 | 3 | 3  | 5    | 1.865 | 1.580 | 1.497 | 0.876 | 7.67    | 11.89 | 5  | 5    | 286 | 31.4  | 7.85 |
| Q6P3X3 | Tetratricopeptide repeat protein 27<br>OS=Homo sapiens<br>GN=TTC27<br>PE=1 SV=1 - [TTC27_HUMAN]                      | 8.90  | 1 | 6 | 6  | 12   | 0.786 | 0.930 | 1.003 | 0.876 | 20.74   | 8.90  | 9  | 12   | 843 | 96.6  | 5.59 |
| Q8TDW5 | Synaptotagmin-like protein 5<br>OS=Homo sapiens<br>GN=SYTL5<br>PE=1 SV=1 - [SYTL5_HUMAN]                             | 2.05  | 1 | 1 | 2  | 3    | 0.923 | 1.113 | 1.379 | 0.877 | 2.00    | 2.05  | 2  | 3    | 730 | 81.5  | 8.78 |
| O43427 | Acidic fibroblast growth factor intracellular-binding protein<br>OS=Homo sapiens<br>GN=FIBP PE=1 SV=3 - [FIBP_HUMAN] | 5.77  | 1 | 2 | 2  | 5    | 1.103 | 0.951 | 0.880 | 0.877 | 7.14    | 5.77  | 3  | 5    | 364 | 41.9  | 6.48 |
| Q4G0N4 | NAD kinase 2, mitochondrial<br>OS=Homo sapiens<br>GN=NADK2<br>PE=1 SV=2 - [NAKD2_HUMAN]                              | 15.16 | 1 | 6 | 6  | 15   | 0.753 | 0.848 | 0.721 | 0.877 | 29.70   | 15.16 | 9  | 15   | 442 | 49.4  | 8.18 |
| Q13748 | Tubulin alpha-3C/D chain<br>OS=Homo sapiens<br>GN=TUBA3C<br>PE=1 SV=3 - [TBA3C_HUMAN]                                | 52.22 | 5 | 1 | 24 | 1068 | 0.829 | 0.743 | 0.687 | 0.877 | 3120.65 | 52.22 | 42 | 1068 | 450 | 49.9  | 5.10 |

|        |                                                                                                                                     |       |   |    |    |     |       |       |       |       |        |       |    |     |      |       |      |
|--------|-------------------------------------------------------------------------------------------------------------------------------------|-------|---|----|----|-----|-------|-------|-------|-------|--------|-------|----|-----|------|-------|------|
| P12081 | Histidine--tRNA<br>ligase,<br>cytoplasmic<br>OS=Homo<br>sapiens<br>GN=HARS<br>PE=1 SV=2 -<br>[SYHC_HUMAN]                           | 48.33 | 2 | 17 | 24 | 101 | 0.916 | 1.092 | 1.154 | 0.877 | 253.57 | 48.33 | 40 | 101 | 509  | 57.4  | 5.88 |
| Q8NFW8 | N-<br>acylneuraminat<br>e<br>cytidyltransfer<br>ase OS=Homo<br>sapiens<br>GN=CMAS<br>PE=1 SV=2 -<br>[NEUA_HUMAN]                    | 21.89 | 1 | 6  | 6  | 17  | 0.794 | 1.337 | 1.100 | 0.877 | 54.53  | 21.89 | 11 | 17  | 434  | 48.3  | 7.93 |
| O14744 | Protein<br>arginine N-<br>methyltransfer<br>ase 5<br>OS=Homo<br>sapiens<br>GN=PRMT5<br>PE=1 SV=4 -<br>[ANM5_HUMAN]                  | 16.01 | 1 | 10 | 10 | 31  | 0.904 | 0.850 | 0.826 | 0.877 | 74.30  | 16.01 | 15 | 31  | 637  | 72.6  | 6.29 |
| P42229 | Signal<br>transducer and<br>activator of<br>transcription<br>5A OS=Homo<br>sapiens<br>GN=STAT5A<br>PE=1 SV=1 -<br>[STA5A_HUMAN<br>] | 14.48 | 2 | 2  | 11 | 29  | 1.240 | 1.275 | 1.309 | 0.877 | 56.15  | 14.48 | 18 | 29  | 794  | 90.6  | 6.39 |
| Q9NYP8 | Uncharacterize<br>d protein<br>C21orf62<br>OS=Homo<br>sapiens<br>GN=C21orf62<br>PE=1 SV=2 -<br>[CU062_HUMAN<br>]                    | 2.74  | 1 | 1  | 1  | 1   | 4.709 | 0.240 | 0.310 | 0.877 | 1.73   | 2.74  | 1  | 1   | 219  | 24.9  | 8.02 |
| B011T2 | Unconventional<br>myosin-Ig<br>OS=Homo<br>sapiens<br>GN=MYO1G<br>PE=1 SV=2 -<br>[MYO1G_HUMA<br>N]                                   | 2.46  | 1 | 1  | 2  | 6   | 2.161 | 1.078 | 1.358 | 0.877 | 12.06  | 2.46  | 3  | 6   | 1018 | 116.4 | 8.73 |
| P32456 | Interferon-<br>induced<br>guanylate-<br>binding protein<br>2 OS=Homo<br>sapiens<br>GN=GBP2<br>PE=1 SV=3 -<br>[GBP2_HUMAN]           | 32.66 | 2 | 21 | 26 | 129 | 1.243 | 1.145 | 1.171 | 0.877 | 293.21 | 32.66 | 40 | 129 | 591  | 67.2  | 5.71 |
| Q6ZUT3 | FERM domain-<br>containing<br>protein 7<br>OS=Homo<br>sapiens<br>GN=FRMD7<br>PE=1 SV=1 -<br>[FRMD7_HUMA<br>N]                       | 0.84  | 1 | 1  | 1  | 1   | 0.813 | 0.927 | 1.081 | 0.877 | 2.23   | 0.84  | 1  | 1   | 714  | 81.6  | 7.90 |



|        |                                                                                                            |       |   |    |    |     |       |       |       |       |        |       |    |     |      |       |      |
|--------|------------------------------------------------------------------------------------------------------------|-------|---|----|----|-----|-------|-------|-------|-------|--------|-------|----|-----|------|-------|------|
| P62330 | ADP-ribosylation factor 6<br>OS=Homo sapiens<br>GN=ARF6<br>PE=1 SV=2 - [ARF6_HUMAN]                        | 43.43 | 3 | 6  | 7  | 20  | 1.244 | 0.593 | 0.614 | 0.877 | 39.25  | 43.43 | 12 | 20  | 175  | 20.1  | 8.95 |
| Q86VS8 | Protein Hook homolog 3<br>OS=Homo sapiens<br>GN=HOOK3<br>PE=1 SV=2 - [HOOK3_HUMAN]                         | 31.48 | 1 | 22 | 23 | 63  | 0.795 | 1.061 | 0.937 | 0.877 | 155.73 | 31.48 | 34 | 63  | 718  | 83.1  | 5.17 |
| Q86X02 | Cerebellar degeneration-related protein 2-like<br>OS=Homo sapiens<br>GN=CDR2L<br>PE=2 SV=2 - [CDR2L_HUMAN] | 6.67  | 1 | 2  | 3  | 5   | 0.984 | 0.679 | 1.154 | 0.877 | 10.22  | 6.67  | 5  | 5   | 465  | 53.0  | 6.01 |
| P30626 | Sordin<br>OS=Homo sapiens<br>GN=SRI PE=1 SV=1 - [SORCN_HUMAN]                                              | 45.96 | 1 | 8  | 8  | 33  | 0.834 | 0.977 | 1.271 | 0.877 | 67.80  | 45.96 | 13 | 33  | 198  | 21.7  | 5.59 |
| O75143 | Autophagy-related protein 13<br>OS=Homo sapiens<br>GN=ATG13<br>PE=1 SV=1 - [ATG13_HUMAN]                   | 6.58  | 1 | 2  | 3  | 6   | 0.758 | 0.920 | 0.930 | 0.877 | 16.02  | 6.58  | 5  | 6   | 517  | 56.5  | 5.12 |
| O43242 | 26S proteasome non-ATPase regulatory subunit 3<br>OS=Homo sapiens<br>GN=PSMD3<br>PE=1 SV=2 - [PSMD3_HUMAN] | 55.81 | 1 | 30 | 30 | 171 | 0.851 | 0.880 | 0.842 | 0.877 | 394.00 | 55.81 | 51 | 171 | 534  | 60.9  | 8.44 |
| Q15021 | Condensin complex subunit 1<br>OS=Homo sapiens<br>GN=NCAPD2<br>PE=1 SV=3 - [CND1_HUMAN]                    | 2.78  | 1 | 3  | 3  | 8   | 0.866 | 0.993 | 0.844 | 0.877 | 16.78  | 2.78  | 4  | 8   | 1401 | 157.1 | 6.61 |
| Q9P2M7 | Cingulin<br>OS=Homo sapiens<br>GN=CGN PE=1 SV=2 - [CING_HUMAN]                                             | 1.17  | 2 | 1  | 4  | 9   | 1.089 | 0.804 | 0.763 | 0.877 | 14.70  | 1.17  | 4  | 9   | 1197 | 136.3 | 5.54 |
| P31150 | Rab GDP dissociation inhibitor alpha<br>OS=Homo sapiens<br>GN=GDI1 PE=1 SV=2 - [GDI1_HUMAN]                | 49.89 | 1 | 14 | 21 | 157 | 1.122 | 0.928 | 1.171 | 0.878 | 374.59 | 49.89 | 33 | 157 | 447  | 50.6  | 5.14 |

|        |                                                                                                                                   |       |   |    |    |     |       |       |       |       |         |       |    |     |      |       |      |
|--------|-----------------------------------------------------------------------------------------------------------------------------------|-------|---|----|----|-----|-------|-------|-------|-------|---------|-------|----|-----|------|-------|------|
| O94929 | Actin-binding<br>LIM protein 3<br>OS=Homo<br>sapiens<br>GN=ABLIM3<br>PE=1 SV=3 -<br>[ABLIM3_HUMAN<br>]                            | 12.01 | 1 | 7  | 8  | 14  | 1.045 | 0.928 | 0.796 | 0.878 | 29.12   | 12.01 | 10 | 14  | 683  | 77.8  | 8.54 |
| Q13765 | Nascent<br>polypeptide-<br>associated<br>complex<br>subunit alpha<br>OS=Homo<br>sapiens<br>GN=NACA<br>PE=1 SV=1 -<br>[NACA_HUMAN] | 33.95 | 3 | 6  | 6  | 37  | 0.729 | 1.050 | 0.849 | 0.878 | 103.38  | 33.95 | 9  | 37  | 215  | 23.4  | 4.56 |
| O75131 | Copine-3<br>OS=Homo<br>sapiens<br>GN=CPNE3<br>PE=1 SV=1 -<br>[CPNE3_HUMAN<br>]                                                    | 35.20 | 4 | 17 | 18 | 68  | 0.878 | 1.089 | 0.980 | 0.878 | 166.66  | 35.20 | 30 | 68  | 537  | 60.1  | 5.85 |
| P04083 | Annexin A1<br>OS=Homo<br>sapiens<br>GN=ANXA1<br>PE=1 SV=2 -<br>[ANXA1_HUMAN<br>]                                                  | 69.94 | 1 | 29 | 29 | 836 | 1.099 | 0.674 | 1.196 | 0.878 | 2043.76 | 69.94 | 53 | 836 | 346  | 38.7  | 7.02 |
| Q2TB90 | Putative<br>hexokinase<br>HKDC1<br>OS=Homo<br>sapiens<br>GN=HKDC1<br>PE=1 SV=3 -<br>[HKDC1_HUMAN<br>]                             | 4.03  | 1 | 2  | 4  | 11  | 1.444 | 0.874 | 1.031 | 0.878 | 13.76   | 4.03  | 5  | 11  | 917  | 102.5 | 7.12 |
| P61158 | Actin-related<br>protein 3<br>OS=Homo<br>sapiens<br>GN=ACTR3<br>PE=1 SV=3 -<br>[ARP3_HUMAN]                                       | 48.56 | 3 | 19 | 19 | 288 | 0.966 | 1.068 | 1.199 | 0.878 | 862.27  | 48.56 | 36 | 288 | 418  | 47.3  | 5.88 |
| Q96AV8 | Transcription<br>factor E2F7<br>OS=Homo<br>sapiens<br>GN=E2F7<br>PE=1 SV=3 -<br>[E2F7_HUMAN]                                      | 2.74  | 2 | 2  | 2  | 2   | 1.257 | 0.128 | 0.426 | 0.878 | 2.96    | 2.74  | 2  | 2   | 911  | 99.8  | 8.16 |
| A6NC98 | Coiled-coil<br>domain-<br>containing<br>protein 88B<br>OS=Homo<br>sapiens<br>GN=CCDC88B<br>PE=1 SV=1 -<br>[CC88B_HUMAN<br>]       | 2.51  | 1 | 2  | 5  | 5   | 0.786 | 0.839 | 1.185 | 0.878 | 9.79    | 2.51  | 5  | 5   | 1476 | 164.7 | 5.11 |
| Q9BYV8 | Centrosomal<br>protein of 41<br>kDa OS=Homo<br>sapiens<br>GN=CEP41<br>PE=1 SV=1 -<br>[CEP41_HUMAN<br>]                            | 9.65  | 1 | 3  | 3  | 7   | 0.862 | 1.096 | 1.116 | 0.878 | 17.97   | 9.65  | 3  | 7   | 373  | 41.3  | 8.32 |

|        |                                                                                                                                                                    |       |   |    |    |     |       |       |       |       |        |       |    |     |      |       |       |
|--------|--------------------------------------------------------------------------------------------------------------------------------------------------------------------|-------|---|----|----|-----|-------|-------|-------|-------|--------|-------|----|-----|------|-------|-------|
| Q9BV81 | ER membrane protein complex subunit 6<br>OS=Homo sapiens<br>GN=EMC6<br>PE=1 SV=1 - [EMC6_HUMAN]<br>Succinyl-CoA:3-ketoacid coenzyme A transferase 1, mitochondrial | 20.00 | 1 | 2  | 2  | 9   | 1.036 | 0.842 | 0.873 | 0.879 | 14.03  | 20.00 | 4  | 9   | 110  | 12.0  | 10.07 |
| P55809 | OS=Homo sapiens<br>GN=OXCT1<br>PE=1 SV=1 - [SCOT1_HUMAN]                                                                                                           | 32.12 | 1 | 15 | 15 | 41  | 0.876 | 1.619 | 0.931 | 0.879 | 121.53 | 32.12 | 24 | 41  | 520  | 56.1  | 7.46  |
| Q99622 | Protein C10<br>OS=Homo sapiens<br>GN=C12orf57<br>PE=1 SV=1 - [C10_HUMAN]                                                                                           | 22.22 | 1 | 2  | 2  | 7   | 0.698 | 1.193 | 0.986 | 0.879 | 28.17  | 22.22 | 3  | 7   | 126  | 13.2  | 5.14  |
| Q9Y608 | Leucine-rich repeat flightless-interacting protein 2<br>OS=Homo sapiens<br>GN=LRRFIP2<br>PE=1 SV=1 - [LRRF2_HUMAN]<br>Golgi phosphoprotein 3<br>OS=Homo sapiens    | 20.11 | 1 | 14 | 18 | 68  | 0.854 | 1.086 | 1.076 | 0.879 | 174.42 | 20.11 | 24 | 68  | 721  | 82.1  | 6.95  |
| Q9H4A6 | GN=GOLPH3<br>PE=1 SV=1 - [GOLP3_HUMAN]                                                                                                                             | 14.43 | 1 | 3  | 4  | 5   | 0.639 | 0.795 | 0.811 | 0.879 | 11.58  | 14.43 | 5  | 5   | 298  | 33.8  | 6.44  |
| Q8NH69 | Olfactory receptor 5W2<br>OS=Homo sapiens<br>GN=ORSW2<br>PE=2 SV=1 - [ORSW2_HUMAN]                                                                                 | 2.58  | 2 | 1  | 1  | 1   | 1.501 | 1.025 | 1.330 | 0.879 | 0.00   | 2.58  | 1  | 1   | 310  | 35.1  | 7.01  |
| Q04637 | Eukaryotic translation initiation factor 4 gamma 1<br>OS=Homo sapiens<br>GN=EIF4G1<br>PE=1 SV=4 - [IF4G1_HUMAN]                                                    | 34.90 | 1 | 41 | 49 | 286 | 0.837 | 0.860 | 0.901 | 0.879 | 604.74 | 34.90 | 79 | 286 | 1599 | 175.4 | 5.33  |
| Q9UL54 | Serine/threonine-protein kinase TAO2<br>OS=Homo sapiens<br>GN=TAOK2<br>PE=1 SV=2 - [TAOK2_HUMAN]                                                                   | 3.89  | 1 | 2  | 5  | 16  | 1.509 | 1.261 | 1.122 | 0.879 | 37.95  | 3.89  | 9  | 16  | 1235 | 138.2 | 7.27  |
| Q9H4M9 | EH domain-containing protein 1<br>OS=Homo sapiens<br>GN=EHD1<br>PE=1 SV=2 - [EHD1_HUMAN]                                                                           | 61.80 | 2 | 29 | 39 | 237 | 1.026 | 1.199 | 1.415 | 0.879 | 573.21 | 61.80 | 57 | 237 | 534  | 60.6  | 6.83  |

|        |                                                                                                              |       |   |    |    |     |       |       |       |       |        |       |    |     |     |       |      |
|--------|--------------------------------------------------------------------------------------------------------------|-------|---|----|----|-----|-------|-------|-------|-------|--------|-------|----|-----|-----|-------|------|
| P07202 | Thyroid peroxidase<br>OS=Homo sapiens<br>GN=TPO PE=1 SV=4 - [PERT_HUMAN]                                     | 5.14  | 1 | 2  | 2  | 13  | 2.018 | 0.279 | 0.693 | 0.879 | 28.78  | 5.14  | 2  | 13  | 933 | 102.9 | 6.76 |
| Q02818 | Nudeobindin-1<br>OS=Homo sapiens<br>GN=NUCB1 PE=1 SV=4 - [NUCB1_HUMAN]                                       | 65.73 | 1 | 26 | 27 | 134 | 0.837 | 0.932 | 1.079 | 0.879 | 363.82 | 65.73 | 43 | 134 | 461 | 53.8  | 5.25 |
| O15305 | Phosphomannomutase 2<br>OS=Homo sapiens<br>GN=PMM2 PE=1 SV=1 - [PMM2_HUMAN]                                  | 46.75 | 1 | 12 | 13 | 36  | 1.003 | 0.941 | 1.058 | 0.879 | 82.28  | 46.75 | 19 | 36  | 246 | 28.1  | 6.77 |
| Q13630 | GDP-L-fucose synthase<br>OS=Homo sapiens<br>GN=TSTA3 PE=1 SV=1 - [FCL_HUMAN]                                 | 34.27 | 1 | 8  | 8  | 20  | 0.869 | 1.072 | 1.109 | 0.879 | 57.79  | 34.27 | 13 | 20  | 321 | 35.9  | 6.60 |
| Q99584 | Protein S100-A13<br>OS=Homo sapiens<br>GN=S100A13 PE=1 SV=1 - [S10AD_HUMAN]                                  | 55.10 | 1 | 8  | 8  | 114 | 0.736 | 1.120 | 0.990 | 0.880 | 248.05 | 55.10 | 15 | 114 | 98  | 11.5  | 6.16 |
| P15622 | Zinc finger protein 250<br>OS=Homo sapiens<br>GN=ZNF250 PE=2 SV=3 - [ZN250_HUMAN]                            | 2.32  | 1 | 1  | 1  | 1   | 0.323 | 1.101 | 0.934 | 0.880 | 2.66   | 2.32  | 1  | 1   | 560 | 63.4  | 8.28 |
| Q14232 | Translation initiation factor eIF-2B subunit alpha<br>OS=Homo sapiens<br>GN=EIF2B1 PE=1 SV=1 - [EI2BA_HUMAN] | 50.82 | 1 | 14 | 14 | 45  | 1.020 | 0.926 | 0.957 | 0.880 | 94.42  | 50.82 | 22 | 45  | 305 | 33.7  | 7.33 |
| Q96J82 | Conserved oligomeric Golgi complex subunit 3<br>OS=Homo sapiens<br>GN=COG3 PE=1 SV=3 - [COG3_HUMAN]          | 11.71 | 1 | 9  | 9  | 28  | 0.844 | 0.890 | 1.003 | 0.880 | 67.04  | 11.71 | 14 | 28  | 828 | 94.0  | 5.57 |
| Q9UJY1 | Heat shock protein beta-8<br>OS=Homo sapiens<br>GN=HSPB8 PE=1 SV=1 - [HSPB8_HUMAN]                           | 32.14 | 1 | 6  | 6  | 12  | 0.772 | 0.929 | 1.208 | 0.880 | 19.67  | 32.14 | 9  | 12  | 196 | 21.6  | 5.12 |

|        |                                                                                                          |       |   |    |    |    |       |       |       |       |        |       |    |    |      |       |       |
|--------|----------------------------------------------------------------------------------------------------------|-------|---|----|----|----|-------|-------|-------|-------|--------|-------|----|----|------|-------|-------|
| Q9H1H9 | Kinesin-like protein KIF13A<br>OS=Homo sapiens<br>GN=KIF13A<br>PE=1 SV=2 - [K113A_HUMAN]                 | 9.75  | 1 | 12 | 16 | 38 | 0.893 | 0.940 | 1.441 | 0.880 | 84.18  | 9.75  | 22 | 38 | 1805 | 202.2 | 5.60  |
| O75526 | RNA-binding motif protein, X-linked-like-2<br>OS=Homo sapiens<br>GN=RBMXL2<br>PE=1 SV=3 - [RMLX2_HUMAN]  | 7.65  | 2 | 1  | 3  | 12 | 1.176 | 0.791 | 0.837 | 0.880 | 32.56  | 7.65  | 5  | 12 | 392  | 42.8  | 10.32 |
| Q8N0Z6 | Tetratricopeptide repeat protein 5<br>OS=Homo sapiens<br>GN=TTCS<br>PE=1 SV=2 - [TTCS_HUMAN]             | 5.91  | 1 | 2  | 2  | 8  | 0.832 | 0.751 | 1.296 | 0.880 | 17.62  | 5.91  | 4  | 8  | 440  | 48.9  | 6.48  |
| Q6NSW5 | Protein FAM45B<br>OS=Homo sapiens<br>GN=FAM45B<br>PE=2 SV=1 - [FA45B_HUMAN]                              | 10.08 | 2 | 3  | 3  | 7  | 1.162 | 0.981 | 0.962 | 0.880 | 13.80  | 10.08 | 5  | 7  | 357  | 40.5  | 6.54  |
| Q12959 | Disk large homolog 1<br>OS=Homo sapiens<br>GN=DLG1 PE=1 SV=2 - [DLG1_HUMAN]                              | 30.53 | 2 | 21 | 23 | 78 | 1.002 | 0.963 | 1.153 | 0.880 | 172.69 | 30.53 | 37 | 78 | 904  | 100.4 | 5.76  |
| Q5T8D3 | Acyl-CoA-binding domain-containing protein 5<br>OS=Homo sapiens<br>GN=ACBD5<br>PE=1 SV=1 - [ACBD5_HUMAN] | 15.36 | 1 | 6  | 6  | 11 | 1.049 | 1.103 | 0.916 | 0.880 | 28.61  | 15.36 | 8  | 11 | 534  | 60.1  | 5.33  |
| Q96CT7 | Coiled-coil domain-containing protein 124<br>OS=Homo sapiens<br>GN=CCDC124<br>PE=1 SV=1 - [CC124_HUMAN]  | 55.61 | 1 | 13 | 13 | 62 | 0.795 | 1.055 | 1.037 | 0.880 | 169.35 | 55.61 | 23 | 62 | 223  | 25.8  | 9.54  |
| O60925 | Prefoldin subunit 1<br>OS=Homo sapiens<br>GN=PFDN1<br>PE=1 SV=2 - [PFD1_HUMAN]                           | 50.00 | 1 | 8  | 8  | 35 | 0.921 | 1.149 | 1.011 | 0.880 | 79.15  | 50.00 | 12 | 35 | 122  | 14.2  | 6.81  |
| Q9UKZ1 | CCR4-NOT transcription complex subunit 11<br>OS=Homo sapiens<br>GN=CNOT11<br>PE=1 SV=1 - [CNO11_HUMAN]   | 5.49  | 1 | 2  | 2  | 4  | 0.852 | 0.982 | 0.843 | 0.880 | 8.38   | 5.49  | 3  | 4  | 510  | 55.2  | 6.40  |

|        |                                                                                                                                                                                                                                                |       |   |    |    |     |       |       |       |       |         |       |    |     |      |       |      |
|--------|------------------------------------------------------------------------------------------------------------------------------------------------------------------------------------------------------------------------------------------------|-------|---|----|----|-----|-------|-------|-------|-------|---------|-------|----|-----|------|-------|------|
| Q15042 | Rab3 GTPase-activating protein catalytic subunit<br>OS=Homo sapiens<br>GN=RAB3GAP1<br>PE=1 SV=3 - [R3GP_HUMAN]<br>Transient receptor potential cation channel subfamily M member 4<br>OS=Homo sapiens<br>GN=TRPM4<br>PE=1 SV=1 - [TRPM4_HUMAN] | 25.28 | 1 | 23 | 23 | 68  | 0.947 | 1.052 | 1.034 | 0.881 | 143.92  | 25.28 | 38 | 68  | 981  | 110.5 | 5.55 |
| Q8TD43 | Actin-related protein 2/3 complex subunit 1A<br>OS=Homo sapiens<br>GN=ARPC1A<br>PE=1 SV=2 - [ARC1A_HUMAN]                                                                                                                                      | 6.18  | 1 | 7  | 7  | 18  | 1.090 | 0.636 | 0.671 | 0.881 | 36.41   | 6.18  | 11 | 18  | 1214 | 134.2 | 8.15 |
| Q92747 | Coiled-coil domain-containing protein 6<br>OS=Homo sapiens<br>GN=CCDC6<br>PE=1 SV=2 - [CCDC6_HUMAN]                                                                                                                                            | 21.35 | 1 | 8  | 8  | 23  | 0.793 | 0.690 | 0.777 | 0.881 | 44.66   | 21.35 | 12 | 23  | 370  | 41.5  | 8.18 |
| Q16204 | Profilin-1<br>OS=Homo sapiens<br>GN=PFN1<br>PE=1 SV=2 - [PROF1_HUMAN]                                                                                                                                                                          | 31.65 | 1 | 14 | 15 | 64  | 0.783 | 1.061 | 1.281 | 0.881 | 143.07  | 31.65 | 25 | 64  | 474  | 53.3  | 7.34 |
| P07737 | Kelch-like protein 29<br>OS=Homo sapiens<br>GN=KLHL29<br>PE=2 SV=3 - [KLH29_HUMAN]                                                                                                                                                             | 75.00 | 1 | 13 | 13 | 852 | 1.164 | 1.047 | 1.165 | 0.881 | 2583.77 | 75.00 | 26 | 852 | 140  | 15.0  | 8.27 |
| Q96CT2 | COMM domain-containing protein 7<br>OS=Homo sapiens<br>GN=COMMD7<br>PE=1 SV=2 - [COMD7_HUMAN]                                                                                                                                                  | 2.40  | 1 | 2  | 2  | 2   | 1.332 | 0.920 | 1.232 | 0.881 | 4.40    | 2.40  | 2  | 2   | 875  | 94.2  | 7.17 |
| Q86VX2 | Alpha-1,3-mannosyl-glycoprotein 4-beta-N-acetylglucosaminyltransferase B<br>OS=Homo sapiens<br>GN=MGAT4B<br>PE=1 SV=1 - [MGT4B_HUMAN]                                                                                                          | 7.50  | 1 | 1  | 1  | 1   | 0.984 | 1.101 | 0.820 | 0.881 | 4.50    | 7.50  | 1  | 1   | 200  | 22.5  | 5.92 |
| Q9UQ53 |                                                                                                                                                                                                                                                | 5.66  | 1 | 3  | 3  | 4   | 1.079 | 0.877 | 0.924 | 0.881 | 9.70    | 5.66  | 4  | 4   | 548  | 63.2  | 7.87 |

|        |                                                                                                                         |       |   |    |    |     |       |       |       |       |        |       |    |     |      |       |      |
|--------|-------------------------------------------------------------------------------------------------------------------------|-------|---|----|----|-----|-------|-------|-------|-------|--------|-------|----|-----|------|-------|------|
| Q14376 | UDP-glucose 4-epimerase<br>OS=Homo sapiens<br>GN=GALE PE=1 SV=2 - [GALE_HUMAN]                                          | 19.54 | 1 | 7  | 7  | 19  | 0.976 | 1.000 | 1.155 | 0.881 | 26.39  | 19.54 | 11 | 19  | 348  | 38.3  | 6.73 |
| O14787 | Transportin-2<br>OS=Homo sapiens<br>GN=TNPO2 PE=1 SV=3 - [TNPO2_HUMAN]                                                  | 9.48  | 1 | 3  | 7  | 14  | 0.867 | 0.677 | 0.857 | 0.881 | 33.39  | 9.48  | 10 | 14  | 897  | 101.3 | 5.01 |
| Q8NI27 | THO complex subunit 2<br>OS=Homo sapiens<br>GN=THOC2 PE=1 SV=2 - [THOC2_HUMAN]                                          | 3.01  | 1 | 5  | 5  | 10  | 0.950 | 0.753 | 0.929 | 0.881 | 27.98  | 3.01  | 5  | 10  | 1593 | 182.7 | 8.44 |
| O43615 | Mitochondrial import inner membrane translocase subunit TIM44<br>OS=Homo sapiens<br>GN=TIMM44 PE=1 SV=2 - [TIM44_HUMAN] | 25.88 | 1 | 13 | 13 | 39  | 0.877 | 1.087 | 0.920 | 0.882 | 103.84 | 25.88 | 23 | 39  | 452  | 51.3  | 8.32 |
| Q9NUI1 | Peroxisomal 2,4-dienoyl-CoA reductase<br>OS=Homo sapiens<br>GN=DECR2 PE=1 SV=1 - [DECR2_HUMAN]                          | 21.92 | 1 | 6  | 6  | 28  | 1.083 | 1.237 | 1.275 | 0.882 | 51.28  | 21.92 | 10 | 28  | 292  | 30.8  | 9.22 |
| Q8NHQ1 | Centrosomal protein of 70 kDa<br>OS=Homo sapiens<br>GN=CEP70 PE=1 SV=2 - [CEP70_HUMAN]                                  | 5.19  | 1 | 2  | 2  | 2   | 1.017 | 0.864 | 0.736 | 0.882 | 4.27   | 5.19  | 2  | 2   | 597  | 69.7  | 5.71 |
| Q9BVM2 | Protein DPCD<br>OS=Homo sapiens<br>GN=DPCD PE=1 SV=2 - [DPCD_HUMAN]                                                     | 8.87  | 1 | 2  | 2  | 4   | 0.932 | 0.713 | 0.846 | 0.882 | 8.16   | 8.87  | 3  | 4   | 203  | 23.2  | 9.03 |
| Q9Y5X1 | Sorting nexin-9<br>OS=Homo sapiens<br>GN=SNX9 PE=1 SV=1 - [SNX9_HUMAN]                                                  | 30.59 | 1 | 18 | 19 | 60  | 1.135 | 0.960 | 0.905 | 0.882 | 140.90 | 30.59 | 26 | 60  | 595  | 66.5  | 5.58 |
| P33527 | Multidrug resistance-associated protein 1<br>OS=Homo sapiens<br>GN=ABCC1 PE=1 SV=3 - [MRP1_HUMAN]                       | 27.63 | 1 | 35 | 36 | 128 | 1.537 | 0.610 | 0.731 | 0.882 | 364.44 | 27.63 | 60 | 128 | 1531 | 171.5 | 7.11 |

|        |                                                                                                                                                                                      |       |   |   |   |    |       |       |       |       |       |       |   |    |      |       |      |
|--------|--------------------------------------------------------------------------------------------------------------------------------------------------------------------------------------|-------|---|---|---|----|-------|-------|-------|-------|-------|-------|---|----|------|-------|------|
| Q6P988 | Protein notum homolog<br>OS=Homo sapiens<br>GN=NOTUM<br>PE=2 SV=2 - [NOTUM_HUMAN]<br>GRAM domain-containing protein 1A<br>OS=Homo sapiens<br>GN=GRAMD1A<br>PE=1 SV=2 - [GRM1A_HUMAN] | 2.42  | 1 | 1 | 1 | 1  | 0.697 | 0.742 | 0.587 | 0.882 | 2.36  | 2.42  | 1 | 1  | 496  | 55.7  | 7.55 |
| Q96CP6 | Nuclear receptor subfamily 1 group D member 2<br>OS=Homo sapiens<br>GN=NR1D2<br>PE=1 SV=3 - [NR1D2_HUMAN]                                                                            | 7.18  | 1 | 3 | 3 | 7  | 0.994 | 0.853 | 1.003 | 0.882 | 17.78 | 7.18  | 4 | 7  | 724  | 80.6  | 6.74 |
| Q14995 | N-acyl-aromatic-L-amino acid amidohydrolase (carboxylate-forming)<br>OS=Homo sapiens<br>GN=ACY3<br>PE=1 SV=1 - [ACY3_HUMAN]                                                          | 2.07  | 1 | 1 | 1 | 1  | 1.127 | 1.106 | 1.059 | 0.882 | 2.57  | 2.07  | 1 | 1  | 579  | 64.6  | 7.84 |
| Q96HD9 | Transmembrane 9 superfamily member 2<br>OS=Homo sapiens<br>GN=TM9SF2<br>PE=1 SV=1 - [TM9S2_HUMAN]                                                                                    | 3.45  | 1 | 1 | 1 | 2  | 1.329 | 0.265 | 0.972 | 0.882 | 1.89  | 3.45  | 1 | 2  | 319  | 35.2  | 5.90 |
| Q99805 | Putative ATP-dependent RNA helicase DHX57<br>OS=Homo sapiens<br>GN=DHX57<br>PE=1 SV=2 - [DHX57_HUMAN]                                                                                | 10.26 | 1 | 5 | 5 | 20 | 0.827 | 0.619 | 0.527 | 0.882 | 66.29 | 10.26 | 8 | 20 | 663  | 75.7  | 7.44 |
| Q6P158 | 6-phosphofructose-2-kinase/fructose-2,6-bisphosphatase 2<br>OS=Homo sapiens<br>GN=PFKFB2<br>PE=1 SV=2 - [F262_HUMAN]                                                                 | 5.27  | 2 | 5 | 6 | 9  | 0.738 | 0.890 | 1.142 | 0.882 | 20.89 | 5.27  | 9 | 9  | 1386 | 155.5 | 7.71 |
| O60825 | Dihydroxyacetone phosphate acyltransferase<br>OS=Homo sapiens<br>GN=GNPAT<br>PE=1 SV=1 - [GNPAT_HUMAN]                                                                               | 5.74  | 2 | 3 | 3 | 4  | 1.274 | 1.121 | 1.355 | 0.882 | 5.56  | 5.74  | 4 | 4  | 505  | 58.4  | 8.38 |
| O15228 |                                                                                                                                                                                      | 4.56  | 1 | 3 | 4 | 8  | 1.268 | 0.979 | 1.045 | 0.883 | 13.08 | 4.56  | 6 | 8  | 680  | 77.1  | 6.57 |



|        |                                                                                                                                      |       |   |   |   |    |       |       |       |       |       |       |    |    |     |      |      |
|--------|--------------------------------------------------------------------------------------------------------------------------------------|-------|---|---|---|----|-------|-------|-------|-------|-------|-------|----|----|-----|------|------|
| Q96EK5 | KIF1-binding protein<br>OS=Homo sapiens<br>GN=KIAA1279<br>PE=1 SV=1 - [KBP_HUMAN]                                                    | 15.94 | 1 | 7 | 7 | 16 | 0.735 | 0.954 | 1.010 | 0.883 | 41.38 | 15.94 | 11 | 16 | 621 | 71.8 | 5.49 |
| P49354 | Protein farnesyltransferase/geranylgeranyltransferase type-1 subunit alpha<br>OS=Homo sapiens<br>GN=FNTA<br>PE=1 SV=1 - [FNTA_HUMAN] | 20.32 | 1 | 7 | 7 | 20 | 0.899 | 1.119 | 1.053 | 0.883 | 55.45 | 20.32 | 12 | 20 | 379 | 44.4 | 5.08 |
| Q9GZY8 | Mitochondrial fission factor<br>OS=Homo sapiens<br>GN=MFF PE=1 SV=1 - [MFF_HUMAN]                                                    | 38.01 | 1 | 8 | 8 | 41 | 0.656 | 0.611 | 0.523 | 0.883 | 68.11 | 38.01 | 15 | 41 | 342 | 38.4 | 8.95 |
| P18065 | Insulin-like growth factor-binding protein 2<br>OS=Homo sapiens<br>GN=IGFBP2<br>PE=1 SV=2 - [IBP2_HUMAN]                             | 8.62  | 1 | 3 | 3 | 4  | 1.236 | 2.533 | 2.615 | 0.883 | 7.86  | 8.62  | 4  | 4  | 325 | 34.8 | 7.50 |
| Q9H2D1 | Mitochondrial folate transporter/carrier<br>OS=Homo sapiens<br>GN=SLC25A32<br>PE=1 SV=2 - [MFTC_HUMAN]                               | 3.81  | 1 | 1 | 1 | 2  | 0.847 | 0.545 | 0.854 | 0.883 | 0.00  | 3.81  | 2  | 2  | 315 | 35.4 | 9.45 |
| P23610 | Factor VIII intron 22 protein<br>OS=Homo sapiens<br>GN=F8A1<br>PE=1 SV=2 - [F8I2_HUMAN]                                              | 7.28  | 1 | 2 | 2 | 9  | 1.551 | 1.168 | 1.205 | 0.883 | 15.33 | 7.28  | 4  | 9  | 371 | 39.1 | 6.84 |
| P04209 | Ig lambda chain V-II region NIG-84<br>OS=Homo sapiens<br>PE=1 SV=1 - [LV211_HUMAN]                                                   | 14.29 | 1 | 1 | 1 | 1  | 1.464 | 1.709 | 2.053 | 0.884 | 0.00  | 14.29 | 1  | 1  | 112 | 11.6 | 7.12 |
| Q53H96 | Pyroline-5-carboxylate reductase 3<br>OS=Homo sapiens<br>GN=PYCRL<br>PE=1 SV=3 - [P5CR3_HUMAN]                                       | 18.61 | 1 | 4 | 4 | 14 | 0.785 | 0.759 | 0.860 | 0.884 | 42.03 | 18.61 | 6  | 14 | 274 | 28.6 | 7.72 |
| Q99946 | Proline-rich transmembrane protein 1<br>OS=Homo sapiens<br>GN=PRRT1<br>PE=2 SV=2 - [PRRT1_HUMAN]                                     | 4.90  | 1 | 1 | 1 | 1  | 1.013 | 1.302 | 1.261 | 0.884 | 2.18  | 4.90  | 1  | 1  | 306 | 31.4 | 7.65 |

|        |                                                                                                      |       |   |    |    |    |       |       |       |       |       |       |    |    |      |       |      |
|--------|------------------------------------------------------------------------------------------------------|-------|---|----|----|----|-------|-------|-------|-------|-------|-------|----|----|------|-------|------|
| Q8IWZ6 | Bardet-Biedl syndrome 7 protein<br>OS=Homo sapiens<br>GN=BBS7<br>PE=1 SV=2 - [BBS7_HUMAN]            | 1.40  | 1 | 1  | 1  | 1  | 0.859 | 0.938 | 1.000 | 0.884 | 1.93  | 1.40  | 1  | 1  | 715  | 80.3  | 6.05 |
| Q14439 | Probable G-protein coupled receptor 176<br>OS=Homo sapiens<br>GN=GPR176<br>PE=2 SV=1 - [GP176_HUMAN] | 4.08  | 1 | 2  | 2  | 14 | 1.208 | 1.070 | 1.078 | 0.884 | 31.08 | 4.08  | 2  | 14 | 515  | 57.0  | 8.51 |
| Q8TDG2 | Actin-related protein T1<br>OS=Homo sapiens<br>GN=ACTRT1<br>PE=2 SV=2 - [ACTT1_HUMAN]                | 2.93  | 1 | 1  | 1  | 1  | 1.098 | 0.909 | 1.046 | 0.884 | 2.75  | 2.93  | 1  | 1  | 376  | 41.7  | 6.79 |
| Q08AF3 | Schlafen family member 5<br>OS=Homo sapiens<br>GN=SLFN5<br>PE=1 SV=1 - [SLFN5_HUMAN]                 | 14.37 | 3 | 13 | 14 | 41 | 1.152 | 0.798 | 0.735 | 0.884 | 87.82 | 14.37 | 20 | 41 | 891  | 101.0 | 8.22 |
| Q969M7 | NEDD8-conjugating enzyme UBE2F<br>OS=Homo sapiens<br>GN=UBE2F<br>PE=1 SV=1 - [UBE2F_HUMAN]           | 11.35 | 1 | 2  | 2  | 3  | 0.789 | 1.152 | 1.567 | 0.884 | 6.10  | 11.35 | 3  | 3  | 185  | 21.1  | 6.79 |
| O15379 | Histone deacetylase 3<br>OS=Homo sapiens<br>GN=HDAC3<br>PE=1 SV=2 - [HDAC3_HUMAN]                    | 5.37  | 1 | 2  | 2  | 3  | 0.842 | 1.382 | 1.400 | 0.884 | 7.37  | 5.37  | 3  | 3  | 428  | 48.8  | 5.16 |
| O14618 | Copper chaperone for superoxide dismutase<br>OS=Homo sapiens<br>GN=CCS PE=1 SV=1 - [CCS_HUMAN]       | 16.79 | 1 | 6  | 6  | 16 | 1.096 | 0.962 | 1.105 | 0.884 | 40.65 | 16.79 | 10 | 16 | 274  | 29.0  | 5.58 |
| Q96MY7 | Protein FAM161B<br>OS=Homo sapiens<br>GN=FAM161B<br>PE=1 SV=2 - [F161B_HUMAN]                        | 2.63  | 1 | 2  | 3  | 6  | 1.113 | 0.764 | 0.571 | 0.884 | 10.18 | 2.63  | 3  | 6  | 647  | 73.6  | 9.41 |
| Q5TZA2 | Rootletin<br>OS=Homo sapiens<br>GN=CROCC<br>PE=1 SV=1 - [CROCC_HUMAN]                                | 6.05  | 2 | 9  | 11 | 44 | 0.891 | 1.018 | 0.858 | 0.885 | 99.02 | 6.05  | 16 | 44 | 2017 | 228.4 | 5.50 |

|        |                                                                                                                  |       |   |     |     |      |       |       |       |       |         |       |     |      |      |       |      |
|--------|------------------------------------------------------------------------------------------------------------------|-------|---|-----|-----|------|-------|-------|-------|-------|---------|-------|-----|------|------|-------|------|
| Q8TF40 | Follistatin-like protein 1<br>OS=Homo sapiens<br>GN=FNIP1<br>PE=1 SV=3 - [FNIP1_HUMAN]                           | 2.06  | 1 | 2   | 2   | 2    | 0.641 | 1.014 | 1.092 | 0.885 | 3.33    | 2.06  | 2   | 2    | 1166 | 130.5 | 5.52 |
| P01033 | Metalloproteinase inhibitor 1<br>OS=Homo sapiens<br>GN=TIMP1<br>PE=1 SV=1 - [TIMP1_HUMAN]                        | 10.14 | 1 | 2   | 2   | 8    | 0.625 | 0.761 | 0.859 | 0.885 | 18.45   | 10.14 | 3   | 8    | 207  | 23.2  | 8.10 |
| O43795 | Unconventional myosin-Ib<br>OS=Homo sapiens<br>GN=MYO1B<br>PE=1 SV=3 - [MYO1B_HUMAN]                             | 41.73 | 2 | 45  | 47  | 244  | 1.507 | 0.643 | 0.678 | 0.885 | 565.24  | 41.73 | 75  | 244  | 1136 | 131.9 | 9.38 |
| Q14204 | Cytoplasmic dynein 1 heavy chain 1<br>OS=Homo sapiens<br>GN=DYNC1H1<br>PE=1 SV=5 - [DYHC1_HUMAN]                 | 46.45 | 1 | 209 | 210 | 1100 | 1.004 | 0.931 | 0.921 | 0.885 | 2755.85 | 46.45 | 349 | 1100 | 4646 | 532.1 | 6.40 |
| O43504 | Regulator complex protein<br>LAMTOR5<br>OS=Homo sapiens<br>GN=LAMTOR5<br>PE=1 SV=1 - [LATORS_HUMAN]              | 32.97 | 1 | 2   | 2   | 10   | 0.859 | 1.046 | 1.027 | 0.885 | 32.44   | 32.97 | 3   | 10   | 91   | 9.6   | 4.87 |
| Q96J77 | Tumor protein D55<br>OS=Homo sapiens<br>GN=TPD52L3<br>PE=1 SV=2 - [TPD55_HUMAN]                                  | 4.29  | 1 | 1   | 1   | 1    | 1.854 | 0.708 | 0.667 | 0.885 | 0.00    | 4.29  | 1   | 1    | 140  | 15.5  | 9.95 |
| Q9H9A6 | Leucine-rich repeat-containing protein 40<br>OS=Homo sapiens<br>GN=LRRC40<br>PE=1 SV=1 - [LRC40_HUMAN]           | 27.57 | 1 | 16  | 16  | 41   | 1.006 | 1.033 | 0.986 | 0.885 | 97.22   | 27.57 | 24  | 41   | 602  | 68.2  | 6.43 |
| Q93008 | Probable ubiquitin carboxyl-terminal hydrolase FAF-X<br>OS=Homo sapiens<br>GN=USP9X<br>PE=1 SV=3 - [USP9X_HUMAN] | 16.42 | 5 | 22  | 38  | 113  | 0.923 | 0.923 | 0.982 | 0.885 | 269.70  | 16.42 | 61  | 113  | 2570 | 292.1 | 5.80 |
| Q13085 | Acetyl-CoA carboxylase 1<br>OS=Homo sapiens<br>GN=ACACA<br>PE=1 SV=2 - [ACACA_HUMAN]                             | 7.63  | 1 | 13  | 15  | 31   | 0.913 | 1.131 | 1.146 | 0.885 | 73.73   | 7.63  | 21  | 31   | 2346 | 265.4 | 6.37 |

|        |                                                                                                                                                                                                                                                                                                                                                                                                                                                                                                                                                                                                                                                                                                                                                                                                                                                                                                                                                                                                                                                                                    |      |    |    |     |       |       |       |       |         |       |      |     |      |       |       |      |
|--------|------------------------------------------------------------------------------------------------------------------------------------------------------------------------------------------------------------------------------------------------------------------------------------------------------------------------------------------------------------------------------------------------------------------------------------------------------------------------------------------------------------------------------------------------------------------------------------------------------------------------------------------------------------------------------------------------------------------------------------------------------------------------------------------------------------------------------------------------------------------------------------------------------------------------------------------------------------------------------------------------------------------------------------------------------------------------------------|------|----|----|-----|-------|-------|-------|-------|---------|-------|------|-----|------|-------|-------|------|
| P57071 | PR domain zinc<br>finger protein<br>15 OS=Homo<br>sapiens<br>GN=PRDM15<br>PE=2 SV=4 -<br>[PRD15_HUMAN<br>]<br>Otoferlin<br>OS=Homo<br>sapiens<br>GN=OTOF<br>PE=1 SV=3 -<br>[OTOF_HUMAN<br>]<br>Probable RNA<br>polymerase II<br>nuclear<br>localization<br>protein<br>SLC7A6OS<br>OS=Homo<br>sapiens<br>GN=SLC7A6OS<br>PE=1 SV=2 -<br>[S7A6O_HUMA<br>N]<br>Transcription<br>elongation<br>factor A<br>protein 1<br>OS=Homo<br>sapiens<br>GN=TCEA1<br>PE=1 SV=2 -<br>[TCEA1_HUMAN<br>E3 ubiquitin-<br>protein ligase<br>PDZRN3<br>OS=Homo<br>sapiens<br>GN=PDZRN3<br>PE=1 SV=2 -<br>[PZRN3_HUMAN<br>]<br>HSPB1-<br>associated<br>protein 1<br>OS=Homo<br>sapiens<br>GN=HSPBAP1<br>PE=1 SV=1 -<br>[HBAP1_HUMAN<br>]<br>Microtubule-<br>associated<br>protein RP/EB<br>family member<br>1 OS=Homo<br>sapiens<br>GN=MAPRE1<br>PE=1 SV=3 -<br>[MARE1_HUMA<br>N]<br>Triosephosphat<br>e isomerase<br>OS=Homo<br>sapiens<br>GN=TPI1 PE=1<br>SV=3 -<br>[TPI1S_HUMAN]<br>Protein<br>tyrosine<br>phosphatase<br>type IVA 2<br>OS=Homo<br>sapiens<br>GN=PTP4A2<br>PE=1 SV=1 -<br>[TP4A2_HUMAN | 0.66 | 1  | 1  | 1   | 1     | 0.787 | 0.790 | 1.305 | 0.885   | 2.29  | 0.66 | 1   | 1    | 1507  | 169.2 | 8.24 |
| Q9HC10 | 0.40                                                                                                                                                                                                                                                                                                                                                                                                                                                                                                                                                                                                                                                                                                                                                                                                                                                                                                                                                                                                                                                                               | 1    | 1  | 1  | 1   | 0.940 | 1.418 | 1.846 | 0.885 | 3.16    | 0.40  | 1    | 1   | 1997 | 226.6 | 5.69  |      |
| Q96CW6 | 3.56                                                                                                                                                                                                                                                                                                                                                                                                                                                                                                                                                                                                                                                                                                                                                                                                                                                                                                                                                                                                                                                                               | 1    | 1  | 1  | 2   | 1.053 | 1.288 | 1.303 | 0.885 | 4.50    | 3.56  | 2    | 2   | 309  | 35.0  | 4.60  |      |
| P23193 | 26.25                                                                                                                                                                                                                                                                                                                                                                                                                                                                                                                                                                                                                                                                                                                                                                                                                                                                                                                                                                                                                                                                              | 2    | 9  | 9  | 21  | 0.754 | 1.302 | 0.945 | 0.886 | 50.51   | 26.25 | 13   | 21  | 301  | 33.9  | 8.38  |      |
| Q9UPQ7 | 5.16                                                                                                                                                                                                                                                                                                                                                                                                                                                                                                                                                                                                                                                                                                                                                                                                                                                                                                                                                                                                                                                                               | 1    | 2  | 4  | 5   | 0.906 | 1.414 | 2.034 | 0.886 | 11.65   | 5.16  | 5    | 5   | 1066 | 119.5 | 6.02  |      |
| Q96EW2 | 2.25                                                                                                                                                                                                                                                                                                                                                                                                                                                                                                                                                                                                                                                                                                                                                                                                                                                                                                                                                                                                                                                                               | 1    | 1  | 1  | 2   | 1.243 | 1.142 | 1.053 | 0.886 | 2.23    | 2.25  | 2    | 2   | 488  | 55.1  | 5.60  |      |
| Q15691 | 55.60                                                                                                                                                                                                                                                                                                                                                                                                                                                                                                                                                                                                                                                                                                                                                                                                                                                                                                                                                                                                                                                                              | 1    | 13 | 17 | 65  | 1.054 | 1.342 | 1.217 | 0.886 | 144.39  | 55.60 | 25   | 65  | 268  | 30.0  | 5.14  |      |
| P60174 | 81.82                                                                                                                                                                                                                                                                                                                                                                                                                                                                                                                                                                                                                                                                                                                                                                                                                                                                                                                                                                                                                                                                              | 1    | 23 | 23 | 896 | 1.117 | 1.158 | 0.995 | 0.886 | 2510.92 | 81.82 | 41   | 896 | 286  | 30.8  | 5.92  |      |
| Q12974 | 46.71                                                                                                                                                                                                                                                                                                                                                                                                                                                                                                                                                                                                                                                                                                                                                                                                                                                                                                                                                                                                                                                                              | 1    | 3  | 6  | 20  | 1.598 | 0.891 | 0.963 | 0.886 | 36.36   | 46.71 | 9    | 20  | 167  | 19.1  | 8.37  |      |

|        |                                                                                                                                                                                                                                                                                                                                                                |       |   |    |    |     |       |       |       |       |        |       |    |     |      |       |      |
|--------|----------------------------------------------------------------------------------------------------------------------------------------------------------------------------------------------------------------------------------------------------------------------------------------------------------------------------------------------------------------|-------|---|----|----|-----|-------|-------|-------|-------|--------|-------|----|-----|------|-------|------|
| P28845 | Corticosteroid<br>11-beta-<br>dehydrogenase<br>isozyme 1<br>OS=Homo<br>sapiens<br>GN=HSD11B1<br>PE=1 SV=3 -<br>[DHI1_HUMAN]                                                                                                                                                                                                                                    | 16.78 | 1 | 6  | 6  | 16  | 0.589 | 0.576 | 0.579 | 0.886 | 24.58  | 16.78 | 11 | 16  | 292  | 32.4  | 8.56 |
| A0FGR8 | Extended<br>synaptotagmin-<br>2 OS=Homo<br>sapiens<br>GN=ESYT2<br>PE=1 SV=1 -<br>[ESYT2_HUMAN<br>]<br>1-<br>phosphatidylo<br>sitol 4,5-<br>biphosphate<br>phosphodiester<br>ase delta-1<br>OS=Homo<br>sapiens<br>GN=PLCD1<br>PE=1 SV=2 -<br>[PLCD1_HUMAN<br>]<br>15 kDa<br>selenoprotein<br>OS=Homo<br>sapiens<br>GN=SEP15<br>PE=1 SV=3 -<br>[SEP15_HUMAN<br>] | 24.54 | 2 | 21 | 21 | 71  | 1.616 | 1.016 | 0.925 | 0.886 | 179.33 | 24.54 | 35 | 71  | 921  | 102.3 | 9.26 |
| P51178 | Mitogen-<br>activated<br>protein kinase<br>kinase kinase 6<br>OS=Homo<br>sapiens<br>GN=MAP3K6<br>PE=1 SV=3 -<br>[M3K6_HUMAN]                                                                                                                                                                                                                                   | 15.87 | 1 | 11 | 11 | 32  | 1.362 | 1.074 | 1.293 | 0.886 | 60.55  | 15.87 | 17 | 32  | 756  | 85.6  | 6.70 |
| O60613 | Angiomotin-like<br>protein 1<br>OS=Homo<br>sapiens<br>GN=AMOTL1<br>PE=1 SV=1 -<br>[AMOL1_HUMA<br>N]<br>Protein<br>transport<br>protein Sec31A<br>OS=Homo<br>sapiens<br>GN=SEC31A<br>PE=1 SV=3 -<br>[SC31A_HUMAN<br>]                                                                                                                                           | 17.90 | 1 | 2  | 2  | 15  | 0.964 | 0.623 | 0.710 | 0.887 | 35.06  | 17.90 | 4  | 15  | 162  | 17.8  | 5.03 |
| O95382 | Tetrapeptide<br>repeat<br>protein 23<br>OS=Homo<br>sapiens<br>GN=TTC23<br>PE=2 SV=1 -<br>[TTC23_HUMAN]                                                                                                                                                                                                                                                         | 1.09  | 1 | 1  | 2  | 8   | 0.867 | 0.848 | 0.683 | 0.887 | 20.26  | 1.09  | 3  | 8   | 1288 | 142.5 | 7.11 |
| Q81Y63 | Coatomer<br>subunit beta<br>OS=Homo<br>sapiens<br>GN=COPB1<br>PE=1 SV=3 -<br>[COPB_HUMAN]                                                                                                                                                                                                                                                                      | 7.53  | 2 | 5  | 8  | 10  | 1.000 | 1.409 | 1.289 | 0.887 | 9.35   | 7.53  | 10 | 10  | 956  | 106.5 | 7.11 |
| O94979 |                                                                                                                                                                                                                                                                                                                                                                | 24.59 | 1 | 30 | 31 | 148 | 0.970 | 0.849 | 0.850 | 0.887 | 310.39 | 24.59 | 48 | 148 | 1220 | 132.9 | 6.89 |
| Q5W5X9 |                                                                                                                                                                                                                                                                                                                                                                | 3.58  | 1 | 1  | 1  | 2   | 1.237 | 0.817 | 0.740 | 0.887 | 0.00   | 3.58  | 1  | 2   | 447  | 50.0  | 8.38 |
| P53618 |                                                                                                                                                                                                                                                                                                                                                                | 38.30 | 1 | 34 | 34 | 152 | 0.873 | 0.728 | 0.766 | 0.887 | 371.29 | 38.30 | 51 | 152 | 953  | 107.1 | 6.05 |

|        |                                                                                                                                       |       |   |    |    |     |       |       |       |       |        |       |    |     |     |      |      |
|--------|---------------------------------------------------------------------------------------------------------------------------------------|-------|---|----|----|-----|-------|-------|-------|-------|--------|-------|----|-----|-----|------|------|
| Q13616 | Cullin-1<br>OS=Homo sapiens<br>GN=CUL1 PE=1<br>SV=2 -<br>[CUL1_HUMAN]                                                                 | 16.88 | 1 | 15 | 16 | 23  | 0.965 | 0.989 | 1.052 | 0.887 | 35.05  | 16.88 | 20 | 23  | 776 | 89.6 | 8.00 |
| Q96EB1 | Elongator complex protein 4<br>OS=Homo sapiens<br>GN=ELP4 PE=1<br>SV=2 -<br>[ELP4_HUMAN]                                              | 4.48  | 1 | 1  | 1  | 2   | 0.858 | 1.548 | 1.237 | 0.887 | 6.22   | 4.48  | 2  | 2   | 424 | 46.6 | 8.51 |
| P04844 | Dolichyl-diphosphooligosaccharide--protein glycosyltransferase subunit 2<br>OS=Homo sapiens<br>GN=RPN2<br>PE=1 SV=3 -<br>[RPN2_HUMAN] | 30.43 | 1 | 17 | 17 | 104 | 0.659 | 0.654 | 0.680 | 0.887 | 258.50 | 30.43 | 28 | 104 | 631 | 69.2 | 5.69 |
| P06744 | Glucose-6-phosphate isomerase<br>OS=Homo sapiens<br>GN=GPI PE=1<br>SV=4 -<br>[G6PI_HUMAN]                                             | 41.94 | 2 | 25 | 26 | 315 | 1.457 | 0.977 | 0.887 | 0.887 | 707.22 | 41.94 | 46 | 315 | 558 | 63.1 | 8.32 |
| P53677 | AP-3 complex subunit mu-2<br>OS=Homo sapiens<br>GN=AP3M2<br>PE=1 SV=1 -<br>[AP3M2_HUMAN]                                              | 11.72 | 1 | 3  | 6  | 12  | 0.951 | 0.776 | 0.743 | 0.887 | 26.98  | 11.72 | 8  | 12  | 418 | 46.9 | 7.56 |
| P06132 | Uroporphyrinogen decarboxylase<br>OS=Homo sapiens<br>GN=UROD<br>PE=1 SV=2 -<br>[DCUP_HUMAN]                                           | 11.44 | 1 | 4  | 4  | 17  | 0.879 | 1.168 | 0.966 | 0.888 | 30.55  | 11.44 | 7  | 17  | 367 | 40.8 | 6.14 |
| Q7LGS6 | Ribonucleoside-diphosphate reductase subunit M2 B<br>OS=Homo sapiens<br>GN=RRM2B<br>PE=1 SV=1 -<br>[RIR2B_HUMAN]                      | 12.25 | 1 | 3  | 5  | 16  | 1.121 | 0.847 | 1.116 | 0.888 | 37.10  | 12.25 | 6  | 16  | 351 | 40.7 | 4.97 |
| Q96AJ9 | Vesicle transport through interaction with t-SNAREs homolog 1A<br>OS=Homo sapiens<br>GN=VTI1A<br>PE=1 SV=2 -<br>[VTI1A_HUMAN]         | 33.64 | 2 | 8  | 8  | 34  | 1.006 | 0.704 | 0.891 | 0.888 | 90.21  | 33.64 | 13 | 34  | 217 | 25.2 | 6.40 |

|        |                                                                                                                         |       |   |    |    |    |       |       |       |       |        |       |    |    |      |       |      |
|--------|-------------------------------------------------------------------------------------------------------------------------|-------|---|----|----|----|-------|-------|-------|-------|--------|-------|----|----|------|-------|------|
| Q95477 | ATP-binding cassette sub-family A member 1<br>OS=Homo sapiens<br>GN=ABCA1<br>PE=1 SV=3 - [ABCA1_HUMAN]                  | 1.68  | 1 | 4  | 5  | 7  | 0.823 | 1.171 | 0.667 | 0.888 | 10.54  | 1.68  | 6  | 7  | 2261 | 254.1 | 6.86 |
| Q49A88 | Coiled-coil domain-containing protein 14<br>OS=Homo sapiens<br>GN=CCDC14<br>PE=1 SV=3 - [CCDC14_HUMAN]                  | 3.57  | 1 | 2  | 3  | 4  | 0.971 | 3.019 | 7.966 | 0.888 | 6.84   | 3.57  | 3  | 4  | 953  | 106.2 | 8.40 |
| Q13488 | V-type proton ATPase 116 kDa subunit a isoform 3<br>OS=Homo sapiens<br>GN=TCIRG1<br>PE=1 SV=3 - [VPP3_HUMAN]            | 15.66 | 2 | 11 | 12 | 33 | 1.035 | 0.760 | 0.722 | 0.888 | 69.98  | 15.66 | 19 | 33 | 830  | 92.9  | 7.12 |
| Q01085 | Nudeolysin TIAR<br>OS=Homo sapiens<br>GN=TIALL1<br>PE=1 SV=1 - [TIAR_HUMAN]                                             | 15.47 | 1 | 3  | 6  | 21 | 0.788 | 0.889 | 0.851 | 0.888 | 55.39  | 15.47 | 9  | 21 | 375  | 41.6  | 7.74 |
| Q96L16 | Heat shock transcription factor, Y-linked<br>OS=Homo sapiens<br>GN=HSFY1<br>PE=1 SV=1 - [HSFY1_HUMAN]                   | 2.00  | 1 | 1  | 1  | 1  | 1.282 | 1.073 | 1.297 | 0.888 | 2.92   | 2.00  | 1  | 1  | 401  | 45.1  | 7.18 |
| Q75935 | Dynactin subunit 3<br>OS=Homo sapiens<br>GN=DCTN3<br>PE=1 SV=1 - [DCTN3_HUMAN]                                          | 50.00 | 3 | 10 | 11 | 55 | 1.274 | 0.951 | 0.993 | 0.889 | 124.95 | 50.00 | 18 | 55 | 186  | 21.1  | 5.47 |
| Q92530 | Proteasome inhibitor PI31 subunit<br>OS=Homo sapiens<br>GN=PSMF1<br>PE=1 SV=2 - [PSMF1_HUMAN]                           | 43.17 | 2 | 7  | 7  | 19 | 0.883 | 1.193 | 0.963 | 0.889 | 42.18  | 43.17 | 10 | 19 | 271  | 29.8  | 5.74 |
| Q9NYJ1 | Cytochrome c oxidase assembly factor 4 homolog, mitochondrial<br>OS=Homo sapiens<br>GN=COA4<br>PE=1 SV=2 - [COA4_HUMAN] | 41.38 | 1 | 3  | 3  | 14 | 0.534 | 0.843 | 1.000 | 0.889 | 24.21  | 41.38 | 5  | 14 | 87   | 10.1  | 6.04 |

|        |                                                                                                              |       |   |    |    |    |       |       |       |       |        |       |    |    |      |       |      |
|--------|--------------------------------------------------------------------------------------------------------------|-------|---|----|----|----|-------|-------|-------|-------|--------|-------|----|----|------|-------|------|
| Q96LD4 | Tripartite motif-containing protein 47<br>OS=Homo sapiens<br>GN=TRIM47<br>PE=1 SV=2 - [TRIM47_HUMAN]         | 5.02  | 1 | 3  | 3  | 12 | 1.360 | 1.877 | 1.671 | 0.889 | 26.56  | 5.02  | 5  | 12 | 638  | 69.5  | 6.44 |
| Q8IYB5 | Stromal membrane-associated protein 1<br>OS=Homo sapiens<br>GN=SMAP1<br>PE=1 SV=2 - [SMAP1_HUMAN]            | 7.07  | 1 | 4  | 4  | 12 | 0.873 | 1.109 | 1.147 | 0.889 | 17.06  | 7.07  | 6  | 12 | 467  | 50.4  | 8.75 |
| P53007 | Tricarboxylate transport protein, mitochondrial<br>OS=Homo sapiens<br>GN=SLC25A1<br>PE=1 SV=2 - [TXTP_HUMAN] | 16.08 | 1 | 5  | 5  | 23 | 0.816 | 0.824 | 0.821 | 0.889 | 63.49  | 16.08 | 8  | 23 | 311  | 34.0  | 9.89 |
| P14317 | Hematopoietic lineage cell-specific protein<br>OS=Homo sapiens<br>GN=HCLS1<br>PE=1 SV=3 - [HCLS1_HUMAN]      | 1.65  | 1 | 1  | 1  | 3  | 0.542 | 0.580 | 0.690 | 0.889 | 7.99   | 1.65  | 1  | 3  | 486  | 54.0  | 4.81 |
| O15498 | Synaptobrevin homolog YKT6<br>OS=Homo sapiens<br>GN=YKT6<br>PE=1 SV=1 - [YKT6_HUMAN]                         | 55.56 | 1 | 11 | 11 | 59 | 0.822 | 0.825 | 0.960 | 0.889 | 165.55 | 55.56 | 20 | 59 | 198  | 22.4  | 6.92 |
| Q9Y485 | DmX-like protein 1<br>OS=Homo sapiens<br>GN=DMXL1<br>PE=1 SV=3 - [DMXL1_HUMAN]                               | 0.96  | 2 | 3  | 3  | 6  | 0.884 | 0.872 | 1.005 | 0.889 | 13.83  | 0.96  | 4  | 6  | 3027 | 337.6 | 6.34 |
| P19623 | Spermidine synthase<br>OS=Homo sapiens<br>GN=SRM PE=1 SV=1 - [SPEE_HUMAN]                                    | 17.55 | 1 | 6  | 6  | 29 | 0.620 | 0.759 | 0.750 | 0.889 | 70.87  | 17.55 | 10 | 29 | 302  | 33.8  | 5.49 |
| P23443 | Ribosomal protein S6 kinase beta-1<br>OS=Homo sapiens<br>GN=RPS6KB1<br>PE=1 SV=2 - [KS6B1_HUMAN]             | 8.76  | 1 | 3  | 4  | 12 | 0.965 | 0.887 | 0.987 | 0.889 | 21.92  | 8.76  | 7  | 12 | 525  | 59.1  | 6.65 |



|        |                                                                                                                                                                                                                                                                           |       |   |    |    |     |       |       |       |       |        |       |    |     |      |       |       |
|--------|---------------------------------------------------------------------------------------------------------------------------------------------------------------------------------------------------------------------------------------------------------------------------|-------|---|----|----|-----|-------|-------|-------|-------|--------|-------|----|-----|------|-------|-------|
| P15735 | Phosphorylase<br>b kinase<br>gamma<br>catalytic chain,<br>liver/testis<br>isoform<br>OS=Homo<br>sapiens<br>GN=PHKG2<br>PE=1 SV=1 -<br>[PHKG2_HUMAN<br>Coiled-coil-helix-<br>coiled-coil-helix<br>domain-<br>containing<br>protein 1                                       | 7.14  | 1 | 3  | 3  | 11  | 0.663 | 1.126 | 1.294 | 0.889 | 25.12  | 7.14  | 5  | 11  | 406  | 46.4  | 6.38  |
| Q96BP2 | OS=Homo<br>sapiens<br>GN=CHCHD1<br>PE=1 SV=1 -<br>[CHCH1_HUMAN<br>]<br>Laminin subunit<br>beta-2<br>OS=Homo<br>sapiens<br>GN=LAMB2<br>PE=1 SV=2 -<br>[LAMB2_HUMAN<br>]<br>Prolyl 3-<br>hydroxylase 1<br>OS=Homo<br>sapiens<br>GN=LEPRE1<br>PE=1 SV=2 -<br>[P3H1_HUMAN]    | 26.27 | 1 | 2  | 2  | 9   | 1.820 | 0.991 | 1.180 | 0.890 | 24.22  | 26.27 | 3  | 9   | 118  | 13.5  | 10.21 |
| P55268 | Flotillin-1<br>OS=Homo<br>sapiens<br>GN=FLOT1<br>PE=1 SV=3 -<br>[FLOT1_HUMAN<br>]<br>Vang-like<br>protein 1<br>OS=Homo<br>sapiens<br>GN=VANGL1<br>PE=1 SV=1 -<br>[VANGL1_HUMAN<br>]<br>Myomegalin<br>OS=Homo<br>sapiens<br>GN=PDE4DIP<br>PE=1 SV=1 -<br>[MYOME_HUMA<br>N] | 19.30 | 1 | 29 | 29 | 103 | 0.687 | 0.807 | 1.187 | 0.890 | 238.99 | 19.30 | 45 | 103 | 1798 | 195.9 | 6.52  |
| Q32P28 | rRNA-<br>processing<br>protein FCF1<br>homolog<br>OS=Homo<br>sapiens<br>GN=FCF1<br>PE=2 SV=1 -<br>[FCF1_HUMAN]                                                                                                                                                            | 34.65 | 1 | 17 | 19 | 110 | 0.614 | 0.639 | 0.689 | 0.890 | 332.35 | 34.65 | 31 | 110 | 736  | 83.3  | 5.14  |
| O75955 | Xylosyltransfera<br>se 1 OS=Homo<br>sapiens<br>GN=XYLT1<br>PE=1 SV=1 -<br>[XYLT1_HUMAN<br>]                                                                                                                                                                               | 49.88 | 1 | 17 | 18 | 65  | 1.071 | 1.370 | 0.949 | 0.890 | 133.07 | 49.88 | 31 | 65  | 427  | 47.3  | 7.49  |
| Q8TAA9 |                                                                                                                                                                                                                                                                           | 12.21 | 1 | 5  | 5  | 9   | 1.064 | 1.075 | 0.816 | 0.890 | 17.68  | 12.21 | 7  | 9   | 524  | 59.9  | 8.81  |
| Q5VU43 |                                                                                                                                                                                                                                                                           | 7.12  | 3 | 14 | 18 | 34  | 0.875 | 0.813 | 0.957 | 0.890 | 74.69  | 7.12  | 23 | 34  | 2346 | 264.9 | 5.44  |
| Q9Y324 |                                                                                                                                                                                                                                                                           | 3.03  | 1 | 1  | 1  | 1   | 0.750 | 0.937 | 0.670 | 0.890 | 2.49   | 3.03  | 1  | 1   | 198  | 23.4  | 9.70  |
| Q86Y38 |                                                                                                                                                                                                                                                                           | 4.38  | 1 | 2  | 3  | 5   | 0.950 | 0.641 | 0.946 | 0.890 | 9.58   | 4.38  | 3  | 5   | 959  | 107.5 | 9.22  |

|        |                                                                                                                          |       |   |    |    |     |       |       |       |       |        |       |    |     |     |      |      |
|--------|--------------------------------------------------------------------------------------------------------------------------|-------|---|----|----|-----|-------|-------|-------|-------|--------|-------|----|-----|-----|------|------|
| Q9BUM1 | Glucose-6-phosphatase 3<br>OS=Homo sapiens<br>GN=G6PC3<br>PE=1 SV=2 - [G6PC3_HUMAN]                                      | 2.31  | 1 | 1  | 1  | 1   | 0.808 | 0.874 | 0.680 | 0.890 | 0.00   | 2.31  | 1  | 1   | 346 | 38.7 | 8.21 |
| Q8WVM8 | Sec1 family domain-containing protein 1<br>OS=Homo sapiens<br>GN=SCFD1<br>PE=1 SV=4 - [SCFD1_HUMAN]                      | 36.45 | 1 | 20 | 20 | 53  | 1.004 | 0.987 | 0.965 | 0.890 | 155.55 | 36.45 | 31 | 53  | 642 | 72.3 | 6.27 |
| O75874 | Isodrate dehydrogenase [NADP]<br>cytoplasmic<br>OS=Homo sapiens<br>GN=IDH1 PE=1 SV=2 - [IDHC_HUMAN]                      | 51.69 | 1 | 24 | 24 | 128 | 1.058 | 0.927 | 1.087 | 0.891 | 361.01 | 51.69 | 35 | 128 | 414 | 46.6 | 7.01 |
| Q9BT40 | Inositol polyphosphate 5-phosphatase K<br>OS=Homo sapiens<br>GN=INPP5K<br>PE=1 SV=3 - [INP5K_HUMAN]                      | 2.23  | 1 | 1  | 1  | 6   | 1.270 | 0.734 | 0.887 | 0.891 | 18.42  | 2.23  | 2  | 6   | 448 | 51.1 | 6.54 |
| Q9NXW9 | Alpha-ketoglutarate-dependent dioxygenase<br>alkB homolog 4<br>OS=Homo sapiens<br>GN=ALKBH4<br>PE=1 SV=1 - [ALKB4_HUMAN] | 2.32  | 1 | 1  | 1  | 1   | 1.431 | 1.103 | 0.891 | 0.891 | 2.74   | 2.32  | 1  | 1   | 302 | 33.8 | 6.67 |
| P05089 | Arginase-1<br>OS=Homo sapiens<br>GN=ARG1<br>PE=1 SV=2 - [ARG1_HUMAN]                                                     | 2.17  | 1 | 2  | 2  | 7   | 1.936 | 1.060 | 0.833 | 0.891 | 17.21  | 2.17  | 3  | 7   | 322 | 34.7 | 7.21 |
| Q9BY44 | Eukaryotic translation initiation factor 2A<br>OS=Homo sapiens<br>GN=EIF2A<br>PE=1 SV=3 - [EIF2A_HUMAN]                  | 35.56 | 1 | 17 | 18 | 68  | 0.948 | 0.918 | 1.003 | 0.891 | 164.40 | 35.56 | 29 | 68  | 585 | 64.9 | 8.87 |
| O60927 | Protein phosphatase 1 regulatory subunit 11<br>OS=Homo sapiens<br>GN=PPP1R11<br>PE=1 SV=1 - [PP1RB_HUMAN]                | 11.90 | 1 | 1  | 1  | 9   | 1.121 | 1.065 | 1.087 | 0.891 | 36.83  | 11.90 | 2  | 9   | 126 | 13.9 | 7.01 |

|        |                                                                                                            |       |   |    |    |    |       |       |       |       |       |       |    |    |      |       |      |
|--------|------------------------------------------------------------------------------------------------------------|-------|---|----|----|----|-------|-------|-------|-------|-------|-------|----|----|------|-------|------|
| Q8TBG4 | Ethanolamine-phosphate phospho-lyase<br>OS=Homo sapiens<br>GN=ETNPPL<br>PE=1 SV=1 - [AT2L1_HUMAN]          | 1.60  | 1 | 1  | 1  | 2  | 0.545 | 0.683 | 0.904 | 0.892 | 0.00  | 1.60  | 1  | 2  | 499  | 55.6  | 8.10 |
| Q9UP95 | Solute carrier family 12 member 4<br>OS=Homo sapiens<br>GN=SLC12A4<br>PE=1 SV=2 - [S12A4_HUMAN]            | 13.73 | 2 | 15 | 15 | 39 | 1.117 | 0.726 | 0.683 | 0.892 | 97.04 | 13.73 | 25 | 39 | 1085 | 120.6 | 6.44 |
| Q9NYM9 | BET1-like protein<br>OS=Homo sapiens<br>GN=BET1L<br>PE=1 SV=1 - [BET1L_HUMAN]                              | 36.04 | 1 | 4  | 4  | 19 | 0.746 | 0.915 | 0.947 | 0.892 | 45.81 | 36.04 | 7  | 19 | 111  | 12.4  | 8.16 |
| O60284 | Suppression of tumorigenicity 18 protein<br>OS=Homo sapiens<br>GN=ST18<br>PE=1 SV=1 - [ST18_HUMAN]         | 2.29  | 1 | 2  | 2  | 4  | 1.429 | 1.942 | 1.391 | 0.892 | 7.91  | 2.29  | 3  | 4  | 1047 | 115.1 | 6.06 |
| O95825 | Quinone oxidoreductase-like protein 1<br>OS=Homo sapiens<br>GN=CRYZL1<br>PE=1 SV=2 - [QORL1_HUMAN]         | 24.93 | 1 | 8  | 8  | 15 | 0.866 | 0.862 | 0.980 | 0.892 | 34.09 | 24.93 | 12 | 15 | 349  | 38.7  | 5.78 |
| P13726 | Tissue factor<br>OS=Homo sapiens<br>GN=TF<br>PE=1 SV=1 - [TF_HUMAN]                                        | 29.83 | 1 | 8  | 8  | 18 | 3.308 | 0.400 | 1.060 | 0.892 | 48.80 | 29.83 | 10 | 18 | 295  | 33.0  | 7.03 |
| Q08722 | Leukocyte surface antigen CD47<br>OS=Homo sapiens<br>GN=CD47<br>PE=1 SV=1 - [CD47_HUMAN]                   | 8.67  | 1 | 3  | 3  | 21 | 1.458 | 1.282 | 0.761 | 0.892 | 41.85 | 8.67  | 6  | 21 | 323  | 35.2  | 7.21 |
| Q4FZB7 | Histone-lysine N-methyltransferase SUV420H1<br>OS=Homo sapiens<br>GN=SUV420H1<br>PE=1 SV=4 - [SV421_HUMAN] | 1.02  | 1 | 1  | 1  | 1  | 1.401 | 1.043 | 0.856 | 0.892 | 2.49  | 1.02  | 1  | 1  | 885  | 99.1  | 8.78 |
| P01112 | GTPase HRas<br>OS=Homo sapiens<br>GN=HRAS<br>PE=1 SV=1 - [RASH_HUMAN]                                      | 52.91 | 1 | 4  | 6  | 20 | 0.989 | 1.061 | 1.113 | 0.892 | 52.16 | 52.91 | 8  | 20 | 189  | 21.3  | 5.31 |

|        |                                                                                                                                                                                                                                                      |       |   |    |    |    |       |       |       |       |        |       |    |    |      |       |       |
|--------|------------------------------------------------------------------------------------------------------------------------------------------------------------------------------------------------------------------------------------------------------|-------|---|----|----|----|-------|-------|-------|-------|--------|-------|----|----|------|-------|-------|
| Q9UM22 | Mammalian<br>ependymin-<br>related protein<br>1 OS=Homo<br>sapiens<br>GN=EPDR1<br>PE=1 SV=2 -<br>[EPDR1_HUMAN<br>]<br>2-hydroxyacyl-<br>CoA lyase 1<br>OS=Homo<br>sapiens<br>GN=HACL1<br>PE=1 SV=2 -<br>[HACL1_HUMAN<br>]                            | 15.63 | 1 | 3  | 3  | 19 | 0.629 | 1.399 | 0.795 | 0.892 | 51.40  | 15.63 | 5  | 19 | 224  | 25.4  | 6.60  |
| Q9UJ83 | GAS2-like<br>protein 1<br>OS=Homo<br>sapiens<br>GN=GAS2L1<br>PE=1 SV=2 -<br>[GAS2L1_HUMAN<br>]                                                                                                                                                       | 2.08  | 1 | 1  | 1  | 3  | 1.250 | 1.528 | 1.832 | 0.893 | 3.39   | 2.08  | 2  | 3  | 578  | 63.7  | 7.36  |
| Q99501 | Hypoxia-<br>inducible factor<br>1-alpha<br>inhibitor<br>OS=Homo<br>sapiens<br>GN=HIF1AN<br>PE=1 SV=2 -<br>[HIF1N_HUMAN<br>]                                                                                                                          | 1.47  | 1 | 1  | 1  | 5  | 0.975 | 0.923 | 0.897 | 0.893 | 13.50  | 1.47  | 2  | 5  | 681  | 72.7  | 10.05 |
| Q9NWT6 | Putative<br>sodium-coupled<br>neutral amino<br>acid<br>transporter 10<br>OS=Homo<br>sapiens<br>GN=SLC38A10<br>PE=1 SV=2 -<br>[S38AA_HUMAN<br>Neurobeachin-<br>like protein 1<br>OS=Homo<br>sapiens<br>GN=NBEAL1<br>PE=2 SV=3 -<br>[NBEAL1_HUMAN<br>] | 17.48 | 1 | 6  | 6  | 22 | 0.837 | 1.200 | 1.264 | 0.894 | 56.20  | 17.48 | 8  | 22 | 349  | 40.3  | 5.57  |
| Q9HBR0 | Peflin<br>OS=Homo<br>sapiens<br>GN=PEF1<br>PE=1 SV=1 -<br>[PEF1_HUMAN]                                                                                                                                                                               | 19.39 | 1 | 16 | 16 | 45 | 0.772 | 0.970 | 0.835 | 0.894 | 117.71 | 19.39 | 26 | 45 | 1119 | 119.7 | 5.73  |
| Q6ZS30 | Malignant T-<br>cell-amplified<br>sequence 1<br>OS=Homo<br>sapiens<br>GN=MCTS1<br>PE=1 SV=1 -<br>[MCTS1_HUMA<br>N]                                                                                                                                   | 1.82  | 1 | 2  | 3  | 5  | 1.009 | 1.256 | 1.468 | 0.894 | 12.73  | 1.82  | 3  | 5  | 2694 | 307.0 | 6.44  |
| Q9UBV8 | Hephaestin<br>OS=Homo<br>sapiens<br>GN=HEPH<br>PE=2 SV=3 -<br>[HEPH_HUMAN]                                                                                                                                                                           | 15.49 | 1 | 5  | 5  | 19 | 0.917 | 0.933 | 1.052 | 0.894 | 37.75  | 15.49 | 8  | 19 | 284  | 30.4  | 6.54  |
| Q9ULC4 |                                                                                                                                                                                                                                                      | 48.62 | 1 | 8  | 8  | 30 | 0.888 | 0.748 | 0.870 | 0.894 | 78.60  | 48.62 | 12 | 30 | 181  | 20.5  | 8.82  |
| Q9BQS7 |                                                                                                                                                                                                                                                      | 0.69  | 1 | 1  | 1  | 1  | 0.231 | 2.873 | 1.577 | 0.894 | 0.00   | 0.69  | 1  | 1  | 1158 | 130.4 | 5.99  |

|        |                                                                                                                                                                                                                                                                                                                                                                                                                                                                                                                                                                                                                                                                                                                                                                                                                                          |       |   |    |    |     |       |       |       |       |        |       |    |     |      |       |       |
|--------|------------------------------------------------------------------------------------------------------------------------------------------------------------------------------------------------------------------------------------------------------------------------------------------------------------------------------------------------------------------------------------------------------------------------------------------------------------------------------------------------------------------------------------------------------------------------------------------------------------------------------------------------------------------------------------------------------------------------------------------------------------------------------------------------------------------------------------------|-------|---|----|----|-----|-------|-------|-------|-------|--------|-------|----|-----|------|-------|-------|
| Q9UH62 | Armadillo repeat-containing X-linked protein<br>3 OS=Homo sapiens<br>GN=ARMCX3<br>PE=1 SV=1 - [ARMX3_HUMA<br>Protein<br>NipSnap homolog 2<br>OS=Homo sapiens<br>GN=GBAS<br>PE=1 SV=1 - [NIPS2_HUMAN ]<br>Tudor domain-containing protein 7<br>OS=Homo sapiens<br>GN=TDRD7<br>PE=1 SV=2 - [TDRD7_HUMAN ]<br>Tyrosine-protein phosphatase non-receptor type 13<br>OS=Homo sapiens<br>GN=PTPN13<br>PE=1 SV=2 - [PTN13_HUMAN ]<br>40S ribosomal protein S2<br>OS=Homo sapiens<br>GN=RPS2<br>PE=1 SV=2 - [RS2_HUMAN]<br>GRIP and coiled-coil domain-containing protein 1<br>OS=Homo sapiens<br>GN=GCC1<br>PE=1 SV=1 - [GCC1_HUMAN]<br>Torsin-1B<br>OS=Homo sapiens<br>GN=TOR1B<br>PE=1 SV=2 - [TOR1B_HUMAN]<br>Transmembrane anterior posterior transformation protein 1 homolog<br>OS=Homo sapiens<br>GN=TAPT1<br>PE=1 SV=1 - [TAPT1_HUMAN ] | 13.46 | 1 | 4  | 4  | 8   | 0.716 | 0.683 | 0.875 | 0.894 | 17.27  | 13.46 | 5  | 8   | 379  | 42.5  | 8.37  |
| O75323 |                                                                                                                                                                                                                                                                                                                                                                                                                                                                                                                                                                                                                                                                                                                                                                                                                                          | 37.41 | 1 | 9  | 12 | 41  | 0.852 | 1.782 | 1.284 | 0.894 | 85.21  | 37.41 | 16 | 41  | 286  | 33.7  | 9.36  |
| Q8NHU6 |                                                                                                                                                                                                                                                                                                                                                                                                                                                                                                                                                                                                                                                                                                                                                                                                                                          | 3.46  | 1 | 3  | 3  | 4   | 1.353 | 1.066 | 1.145 | 0.895 | 5.69   | 3.46  | 3  | 4   | 1098 | 123.5 | 7.21  |
| Q12923 |                                                                                                                                                                                                                                                                                                                                                                                                                                                                                                                                                                                                                                                                                                                                                                                                                                          | 1.45  | 1 | 3  | 3  | 9   | 1.369 | 0.539 | 1.053 | 0.895 | 15.69  | 1.45  | 5  | 9   | 2485 | 276.7 | 6.42  |
| P15880 |                                                                                                                                                                                                                                                                                                                                                                                                                                                                                                                                                                                                                                                                                                                                                                                                                                          | 60.07 | 1 | 19 | 19 | 189 | 0.855 | 0.807 | 0.805 | 0.895 | 429.45 | 60.07 | 31 | 189 | 293  | 31.3  | 10.24 |
| Q96CN9 |                                                                                                                                                                                                                                                                                                                                                                                                                                                                                                                                                                                                                                                                                                                                                                                                                                          | 10.06 | 1 | 6  | 8  | 17  | 0.850 | 1.035 | 1.205 | 0.895 | 36.58  | 10.06 | 10 | 17  | 775  | 87.8  | 5.45  |
| O14657 |                                                                                                                                                                                                                                                                                                                                                                                                                                                                                                                                                                                                                                                                                                                                                                                                                                          | 18.75 | 1 | 6  | 6  | 19  | 1.038 | 0.713 | 1.071 | 0.895 | 50.22  | 18.75 | 10 | 19  | 336  | 38.0  | 8.54  |
| Q6NXT6 |                                                                                                                                                                                                                                                                                                                                                                                                                                                                                                                                                                                                                                                                                                                                                                                                                                          | 3.00  | 1 | 2  | 2  | 5   | 1.233 | 0.196 | 0.264 | 0.895 | 11.57  | 3.00  | 3  | 5   | 567  | 64.2  | 8.28  |

|        |                                                                                                                   |       |   |   |    |    |       |       |       |       |        |       |    |    |      |       |      |
|--------|-------------------------------------------------------------------------------------------------------------------|-------|---|---|----|----|-------|-------|-------|-------|--------|-------|----|----|------|-------|------|
| O14531 | Dihydropyrimidinase-related protein 4<br>OS=Homo sapiens<br>GN=DPYSL4<br>PE=1 SV=2 - [DPYL4_HUMAN]                | 21.33 | 1 | 7 | 7  | 29 | 0.972 | 0.808 | 0.838 | 0.895 | 90.25  | 21.33 | 12 | 29 | 572  | 61.8  | 7.09 |
| Q7L5N1 | COP9 signalosome complex subunit 6<br>OS=Homo sapiens<br>GN=COPS6<br>PE=1 SV=1 - [CSN6_HUMAN]                     | 33.94 | 1 | 9 | 9  | 21 | 0.831 | 0.781 | 0.835 | 0.895 | 47.66  | 33.94 | 12 | 21 | 327  | 36.1  | 5.73 |
| Q96CD0 | F-box/LRR-repeat protein 8<br>OS=Homo sapiens<br>GN=FBXL8<br>PE=1 SV=1 - [FBXL8_HUMAN]                            | 11.50 | 1 | 3 | 3  | 7  | 0.953 | 0.804 | 1.004 | 0.895 | 14.06  | 11.50 | 4  | 7  | 374  | 40.5  | 7.31 |
| Q81VF5 | T-lymphoma invasion and metastasis-inducing protein 2<br>OS=Homo sapiens<br>GN=TIAM2<br>PE=2 SV=4 - [TIAM2_HUMAN] | 0.82  | 1 | 1 | 1  | 1  | 0.973 | 0.874 | 0.823 | 0.895 | 2.96   | 0.82  | 1  | 1  | 1701 | 190.0 | 7.21 |
| P50238 | Cysteine-rich protein 1<br>OS=Homo sapiens<br>GN=CRIP1<br>PE=1 SV=3 - [CRIP1_HUMAN]                               | 18.18 | 1 | 1 | 2  | 2  | 5.338 | 1.381 | 0.855 | 0.895 | 1.68   | 18.18 | 2  | 2  | 77   | 8.5   | 8.75 |
| Q8TEB1 | DDB1- and CUL4-associated factor 11<br>OS=Homo sapiens<br>GN=DCAF11<br>PE=1 SV=1 - [DCAF11_HUMAN]                 | 2.38  | 1 | 1 | 1  | 4  | 0.906 | 1.250 | 0.936 | 0.895 | 6.74   | 2.38  | 2  | 4  | 546  | 61.6  | 6.40 |
| Q0VDG4 | Secernin-3<br>OS=Homo sapiens<br>GN=SCRN3<br>PE=1 SV=1 - [SCRN3_HUMAN]                                            | 10.14 | 1 | 4 | 4  | 15 | 0.532 | 1.031 | 1.081 | 0.895 | 25.87  | 10.14 | 5  | 15 | 424  | 48.5  | 5.55 |
| O00273 | DNA fragmentation factor subunit alpha<br>OS=Homo sapiens<br>GN=DFFA<br>PE=1 SV=1 - [DFFA_HUMAN]                  | 25.08 | 1 | 7 | 7  | 20 | 0.859 | 1.062 | 0.980 | 0.895 | 54.12  | 25.08 | 11 | 20 | 331  | 36.5  | 4.79 |
| Q7L7X3 | Serine/threonine-protein kinase TAO1<br>OS=Homo sapiens<br>GN=TAOK1<br>PE=1 SV=1 - [TAOK1_HUMAN]                  | 12.69 | 1 | 8 | 14 | 46 | 0.975 | 1.031 | 0.927 | 0.895 | 109.78 | 12.69 | 23 | 46 | 1001 | 116.0 | 7.65 |

|        |                                                                                                                              |       |   |   |   |    |       |       |       |       |        |       |    |    |     |      |      |
|--------|------------------------------------------------------------------------------------------------------------------------------|-------|---|---|---|----|-------|-------|-------|-------|--------|-------|----|----|-----|------|------|
| Q9P2X0 | Dolichol-phosphate<br>mannosyltransferase subunit 3<br>OS=Homo sapiens<br>GN=DPM3<br>PE=1 SV=2 - [DPM3_HUMAN]                | 10.87 | 1 | 1 | 1 | 8  | 0.658 | 0.827 | 0.981 | 0.895 | 17.10  | 10.87 | 2  | 8  | 92  | 10.1 | 5.94 |
| Q75608 | Acyl-protein thioesterase 1<br>OS=Homo sapiens<br>GN=LYPLA1<br>PE=1 SV=1 - [LYPLA1_HUMAN]                                    | 24.78 | 1 | 4 | 4 | 23 | 1.076 | 0.986 | 0.938 | 0.895 | 39.57  | 24.78 | 8  | 23 | 230 | 24.7 | 6.77 |
| Q9P000 | COMM domain-containing protein 9<br>OS=Homo sapiens<br>GN=COMMMD9<br>PE=1 SV=2 - [COMMMD9_HUMAN]                             | 40.40 | 1 | 6 | 6 | 12 | 0.919 | 0.959 | 1.077 | 0.895 | 31.55  | 40.40 | 8  | 12 | 198 | 21.8 | 5.88 |
| Q86Y82 | Syntaxin-12<br>OS=Homo sapiens<br>GN=STX12<br>PE=1 SV=1 - [STX12_HUMAN]                                                      | 27.90 | 1 | 7 | 7 | 29 | 0.843 | 0.786 | 0.744 | 0.895 | 58.70  | 27.90 | 11 | 29 | 276 | 31.6 | 5.59 |
| Q5SR19 | Glycoprotein endo-alpha-1,2-mannosidase<br>OS=Homo sapiens<br>GN=MANEA<br>PE=1 SV=1 - [MANEA_HUMAN]                          | 1.95  | 1 | 1 | 1 | 1  | 0.740 | 2.124 | 1.205 | 0.895 | 0.00   | 1.95  | 1  | 1  | 462 | 53.6 | 9.11 |
| Q99645 | Epiphycan<br>OS=Homo sapiens<br>GN=EPYC<br>PE=2 SV=3 - [EPYC_HUMAN]                                                          | 4.35  | 1 | 1 | 1 | 1  | 0.475 | 0.283 | 0.570 | 0.896 | 2.71   | 4.35  | 1  | 1  | 322 | 36.6 | 4.81 |
| Q14318 | Peptidyl-prolyl cis-trans isomerase FKBP8<br>OS=Homo sapiens<br>GN=FKBP8<br>PE=1 SV=2 - [FKBP8_HUMAN]                        | 22.82 | 1 | 7 | 7 | 39 | 0.818 | 1.150 | 1.047 | 0.896 | 116.78 | 22.82 | 12 | 39 | 412 | 44.5 | 4.84 |
| Q9HOR4 | Haloacid dehalogenase-like hydrolase domain-containing protein 2<br>OS=Homo sapiens<br>GN=HDHD2<br>PE=1 SV=1 - [HDHD2_HUMAN] | 10.81 | 1 | 3 | 3 | 4  | 1.379 | 1.084 | 0.712 | 0.896 | 6.07   | 10.81 | 4  | 4  | 259 | 28.5 | 6.24 |
| Q9Y4A8 | Nuclear factor erythroid 2-related factor 3<br>OS=Homo sapiens<br>GN=NFE2L3<br>PE=1 SV=1 - [NFE2L3_HUMAN]                    | 1.87  | 1 | 1 | 1 | 2  | 0.798 | 0.843 | 1.020 | 0.896 | 0.00   | 1.87  | 1  | 2  | 694 | 76.1 | 5.44 |

|        |                                                                                                                                              |       |   |    |    |    |       |       |       |       |        |       |    |    |      |       |       |
|--------|----------------------------------------------------------------------------------------------------------------------------------------------|-------|---|----|----|----|-------|-------|-------|-------|--------|-------|----|----|------|-------|-------|
| Q8N1B4 | Vacuolar protein sorting-associated protein 52 homolog<br>OS=Homo sapiens<br>GN=VPS52<br>PE=1 SV=1 - [VPS52_HUMAN]                           | 13.14 | 1 | 8  | 8  | 25 | 0.954 | 1.054 | 0.967 | 0.896 | 82.82  | 13.14 | 11 | 25 | 723  | 82.2  | 5.99  |
| Q9Y6A9 | Signal peptidase complex subunit 1<br>OS=Homo sapiens<br>GN=SPCS1<br>PE=1 SV=4 - [SPCS1_HUMAN]                                               | 31.37 | 1 | 2  | 2  | 26 | 1.001 | 0.946 | 0.846 | 0.896 | 63.47  | 31.37 | 3  | 26 | 102  | 11.8  | 9.31  |
| Q14738 | Serine/threonine-protein phosphatase 2A 56 kDa regulatory subunit delta isoform<br>OS=Homo sapiens<br>GN=PPP2R5D<br>PE=1 SV=1 - [2A5D_HUMAN] | 24.09 | 1 | 11 | 14 | 61 | 1.105 | 1.061 | 1.082 | 0.896 | 150.38 | 24.09 | 22 | 61 | 602  | 69.9  | 8.13  |
| Q9NVS9 | Pyridoxine-5'-phosphate oxidase<br>OS=Homo sapiens<br>GN=PNPO<br>PE=1 SV=1 - [PNPO_HUMAN]                                                    | 29.50 | 1 | 5  | 5  | 20 | 0.828 | 0.875 | 1.009 | 0.896 | 56.17  | 29.50 | 8  | 20 | 261  | 30.0  | 7.06  |
| Q8N3K9 | Cardiomyopathy-associated protein 5<br>OS=Homo sapiens<br>GN=CMYA5<br>PE=1 SV=3 - [CMYA5_HUMAN]                                              | 0.98  | 1 | 3  | 4  | 13 | 0.600 | 0.875 | 0.777 | 0.896 | 26.58  | 0.98  | 4  | 13 | 4069 | 448.9 | 4.78  |
| O75494 | Serine/arginine-rich splicing factor 10<br>OS=Homo sapiens<br>GN=SRSF10<br>PE=1 SV=1 - [SRS10_HUMAN]                                         | 22.52 | 2 | 7  | 7  | 32 | 0.692 | 1.013 | 0.919 | 0.897 | 76.11  | 22.52 | 11 | 32 | 262  | 31.3  | 11.27 |
| Q8N2G6 | Zinc finger CCHC domain-containing protein 24<br>OS=Homo sapiens<br>GN=ZCCHC24<br>PE=1 SV=1 - [ZCH24_HUMAN]                                  | 21.99 | 1 | 5  | 5  | 6  | 1.436 | 0.983 | 1.024 | 0.897 | 14.96  | 21.99 | 5  | 6  | 241  | 26.9  | 8.70  |
| P55058 | Phospholipid transfer protein<br>OS=Homo sapiens<br>GN=PLTP<br>PE=1 SV=1 - [PLTP_HUMAN]                                                      | 1.83  | 1 | 1  | 1  | 2  | 0.646 | 0.793 | 0.803 | 0.897 | 3.74   | 1.83  | 1  | 2  | 493  | 54.7  | 7.01  |



|        |                                                                                                         |       |   |    |    |     |       |       |       |       |         |       |    |     |      |       |       |
|--------|---------------------------------------------------------------------------------------------------------|-------|---|----|----|-----|-------|-------|-------|-------|---------|-------|----|-----|------|-------|-------|
| Q16513 | Serine/threonine-protein kinase N2<br>OS=Homo sapiens<br>GN=PKN2<br>PE=1 SV=1 - [PKN2_HUMAN]            | 11.79 | 2 | 7  | 10 | 32  | 0.914 | 1.342 | 0.966 | 0.897 | 62.92   | 11.79 | 16 | 32  | 984  | 112.0 | 6.30  |
| P09972 | Fructose-bisphosphate aldolase C<br>OS=Homo sapiens<br>GN=ALDOC<br>PE=1 SV=2 - [ALDOC_HUMAN]            | 58.24 | 2 | 14 | 23 | 435 | 1.549 | 1.205 | 1.048 | 0.897 | 1242.04 | 58.24 | 34 | 435 | 364  | 39.4  | 6.87  |
| Q15293 | Reticulocalbin-1<br>OS=Homo sapiens<br>GN=RCN1<br>PE=1 SV=1 - [RCN1_HUMAN]                              | 58.61 | 1 | 21 | 21 | 398 | 0.851 | 0.724 | 0.709 | 0.897 | 1174.46 | 58.61 | 36 | 398 | 331  | 38.9  | 5.00  |
| Q9NWU2 | Glucose-induced degradation protein 8 homolog<br>OS=Homo sapiens<br>GN=GID8 PE=1 SV=1 - [GID8_HUMAN]    | 17.54 | 1 | 3  | 3  | 14  | 0.700 | 0.870 | 0.968 | 0.897 | 34.34   | 17.54 | 5  | 14  | 228  | 26.7  | 4.97  |
| Q8TCJ0 | F-box only protein 25<br>OS=Homo sapiens<br>GN=FBXO25<br>PE=1 SV=3 - [FBX25_HUMAN]                      | 3.00  | 1 | 1  | 1  | 1   | 0.927 | 1.433 | 1.491 | 0.897 | 1.97    | 3.00  | 1  | 1   | 367  | 43.3  | 8.09  |
| Q9UJ41 | Rab5 GDP/GTP exchange factor<br>OS=Homo sapiens<br>GN=RABGEF1<br>PE=1 SV=2 - [RABX5_HUMAN]              | 20.06 | 1 | 12 | 12 | 40  | 0.835 | 0.832 | 0.906 | 0.897 | 107.57  | 20.06 | 17 | 40  | 708  | 79.3  | 6.81  |
| Q96GR2 | Long-chain-fatty-acid--CoA ligase ACSBG1<br>OS=Homo sapiens<br>GN=ACSBG1<br>PE=1 SV=2 - [ACBG1_HUMAN]   | 3.59  | 1 | 2  | 2  | 2   | 0.504 | 0.166 | 0.266 | 0.897 | 3.34    | 3.59  | 2  | 2   | 724  | 81.2  | 6.02  |
| O60783 | 28S ribosomal protein S14, mitochondrial<br>OS=Homo sapiens<br>GN=MRPS14<br>PE=1 SV=1 - [RT14_HUMAN]    | 28.91 | 1 | 3  | 3  | 17  | 0.686 | 1.173 | 0.941 | 0.897 | 46.73   | 28.91 | 6  | 17  | 128  | 15.1  | 11.41 |
| Q9ULJ6 | Zinc finger MIZ domain-containing protein 1<br>OS=Homo sapiens<br>GN=ZMIZ1<br>PE=1 SV=3 - [ZMIZ1_HUMAN] | 3.00  | 2 | 3  | 3  | 5   | 0.987 | 1.022 | 1.048 | 0.897 | 7.55    | 3.00  | 3  | 5   | 1067 | 115.4 | 7.46  |

|        |                                                                                                                                                                                                 |       |   |    |    |    |       |       |       |       |        |       |    |    |      |       |      |
|--------|-------------------------------------------------------------------------------------------------------------------------------------------------------------------------------------------------|-------|---|----|----|----|-------|-------|-------|-------|--------|-------|----|----|------|-------|------|
| Q8IY18 | Structural maintenance of chromosomes protein 5<br>OS=Homo sapiens<br>GN=SMC5<br>PE=1 SV=2 - [SMC5_HUMAN]<br>B2 bradykinin receptor<br>OS=Homo sapiens<br>GN=BDKRB2<br>PE=1 SV=2 - [BKR2_HUMAN] | 1.36  | 1 | 1  | 2  | 2  | 0.656 | 0.911 | 0.991 | 0.898 | 4.43   | 1.36  | 2  | 2  | 1101 | 128.7 | 8.38 |
| P30411 | Protein sel-1 homolog 1<br>OS=Homo sapiens<br>GN=SEI1L<br>PE=1 SV=3 - [SEI1L_HUMAN]                                                                                                             | 5.63  | 1 | 2  | 2  | 5  | 1.772 | 0.563 | 0.607 | 0.898 | 9.77   | 5.63  | 3  | 5  | 391  | 44.4  | 8.13 |
| Q9UBV2 | Serine/threonine-protein kinase SMG1<br>OS=Homo sapiens<br>GN=SMG1<br>PE=1 SV=3 - [SMG1_HUMAN]                                                                                                  | 10.83 | 1 | 7  | 7  | 20 | 1.041 | 0.797 | 0.654 | 0.898 | 58.21  | 10.83 | 11 | 20 | 794  | 88.7  | 5.39 |
| Q96Q15 | Proteasome subunit alpha type-3<br>OS=Homo sapiens<br>GN=PSMA3<br>PE=1 SV=2 - [PSA3_HUMAN]                                                                                                      | 2.08  | 2 | 5  | 6  | 9  | 0.766 | 1.090 | 1.062 | 0.898 | 15.38  | 2.08  | 8  | 9  | 3661 | 410.2 | 6.46 |
| P25788 | THO complex subunit 6 homolog<br>OS=Homo sapiens<br>GN=THOC6<br>PE=1 SV=1 - [THOC6_HUMAN]                                                                                                       | 37.65 | 1 | 10 | 10 | 40 | 1.101 | 0.821 | 0.847 | 0.898 | 79.52  | 37.65 | 17 | 40 | 255  | 28.4  | 5.33 |
| Q86W42 | Protein SEC13 homolog<br>OS=Homo sapiens<br>GN=SEC13<br>PE=1 SV=3 - [SEC13_HUMAN]                                                                                                               | 4.11  | 1 | 1  | 1  | 3  | 1.117 | 1.190 | 0.678 | 0.898 | 9.04   | 4.11  | 1  | 3  | 341  | 37.5  | 7.43 |
| P55735 | GDP-mannose 4,6 dehydratase<br>OS=Homo sapiens<br>GN=GMDS<br>PE=1 SV=1 - [GMDS_HUMAN]                                                                                                           | 31.99 | 1 | 8  | 8  | 55 | 0.708 | 0.820 | 0.760 | 0.898 | 144.73 | 31.99 | 11 | 55 | 322  | 35.5  | 5.48 |
| O60547 | TBC1 domain family member 22B<br>OS=Homo sapiens<br>GN=TBC1D22B<br>PE=1 SV=3 - [TB22B_HUMAN]                                                                                                    | 36.29 | 1 | 11 | 11 | 32 | 0.689 | 0.982 | 0.792 | 0.898 | 88.07  | 36.29 | 17 | 32 | 372  | 41.9  | 7.31 |
| Q9NU19 |                                                                                                                                                                                                 | 8.91  | 1 | 3  | 4  | 5  | 1.290 | 0.752 | 0.979 | 0.898 | 10.29  | 8.91  | 5  | 5  | 505  | 59.0  | 7.39 |

|        |                                                                                                                                                       |       |   |    |    |     |       |       |       |       |        |       |    |     |      |       |      |
|--------|-------------------------------------------------------------------------------------------------------------------------------------------------------|-------|---|----|----|-----|-------|-------|-------|-------|--------|-------|----|-----|------|-------|------|
| Q00535 | Cylin-<br>dependent-like<br>kinase 5<br>OS=Homo<br>sapiens<br>GN=CDK5<br>PE=1 SV=3 -<br>[CDK5_HUMAN]                                                  | 16.78 | 6 | 3  | 4  | 28  | 1.371 | 1.167 | 1.139 | 0.898 | 71.07  | 16.78 | 8  | 28  | 292  | 33.3  | 7.66 |
| Q8TE68 | Epidermal<br>growth factor<br>receptor kinase<br>substrate 8-like<br>protein 1<br>OS=Homo<br>sapiens<br>GN=EPS8L1<br>PE=1 SV=3 -<br>[ES8L1_HUMAN<br>] | 1.66  | 1 | 1  | 1  | 1   | 0.976 | 1.012 | 1.739 | 0.898 | 2.76   | 1.66  | 1  | 1   | 723  | 80.2  | 6.04 |
| A6NHX0 | GATS-like<br>protein 2<br>OS=Homo<br>sapiens<br>GN=GATSL2<br>PE=2 SV=3 -<br>[GATL2_HUMAN<br>]                                                         | 13.98 | 2 | 2  | 2  | 4   | 0.471 | 2.286 | 1.638 | 0.898 | 2.34   | 13.98 | 2  | 4   | 329  | 36.0  | 5.16 |
| Q92734 | Protein TFG<br>OS=Homo<br>sapiens<br>GN=TFG PE=1<br>SV=2 -<br>[TFG_HUMAN]                                                                             | 35.00 | 2 | 12 | 14 | 84  | 0.834 | 0.767 | 0.942 | 0.899 | 222.12 | 35.00 | 21 | 84  | 400  | 43.4  | 5.10 |
| Q66GS9 | Centrosomal<br>protein of 135<br>kDa OS=Homo<br>sapiens<br>GN=CEP135<br>PE=1 SV=2 -<br>[CP135_HUMAN<br>]                                              | 3.95  | 2 | 2  | 5  | 8   | 0.963 | 1.702 | 1.712 | 0.899 | 10.45  | 3.95  | 5  | 8   | 1140 | 133.4 | 6.21 |
| P62191 | 26S protease<br>regulatory<br>subunit 4<br>OS=Homo<br>sapiens<br>GN=PSMC1<br>PE=1 SV=1 -<br>[PRS4_HUMAN]                                              | 57.27 | 1 | 25 | 27 | 204 | 0.899 | 1.001 | 1.058 | 0.899 | 455.26 | 57.27 | 41 | 204 | 440  | 49.2  | 6.21 |
| Q15819 | Ubiquitin-<br>conjugating<br>enzyme E2<br>variant 2<br>OS=Homo<br>sapiens<br>GN=UBE2V2<br>PE=1 SV=4 -<br>[UB2V2_HUMAN<br>]                            | 57.93 | 1 | 4  | 8  | 133 | 0.970 | 0.952 | 0.955 | 0.899 | 394.82 | 57.93 | 13 | 133 | 145  | 16.4  | 8.09 |
| Q9Y5P4 | Collagen type<br>IV alpha-3-<br>binding protein<br>OS=Homo<br>sapiens<br>GN=COL4A3BP<br>PE=1 SV=1 -<br>[C43BP_HUMAN<br>]                              | 5.77  | 1 | 3  | 3  | 6   | 0.998 | 1.300 | 1.072 | 0.899 | 14.18  | 5.77  | 6  | 6   | 624  | 70.8  | 5.48 |
| O43402 | ER membrane<br>protein<br>complex<br>subunit 8<br>OS=Homo<br>sapiens<br>GN=EMC8<br>PE=1 SV=1 -<br>[EMC8_HUMAN]                                        | 46.67 | 1 | 9  | 9  | 22  | 0.696 | 0.776 | 0.735 | 0.899 | 51.46  | 46.67 | 14 | 22  | 210  | 23.8  | 6.40 |

|        |                                                                                                                                       |       |   |    |    |     |       |       |       |       |        |       |    |     |      |       |       |
|--------|---------------------------------------------------------------------------------------------------------------------------------------|-------|---|----|----|-----|-------|-------|-------|-------|--------|-------|----|-----|------|-------|-------|
| O00203 | AP-3 complex<br>subunit beta-1<br>OS=Homo<br>sapiens<br>GN=AP3B1<br>PE=1 SV=3 -<br>[AP3B1_HUMAN<br>]                                  | 22.85 | 2 | 26 | 28 | 70  | 0.896 | 0.893 | 0.891 | 0.899 | 152.83 | 22.85 | 39 | 70  | 1094 | 121.2 | 6.04  |
| P62910 | 60S ribosomal<br>protein L32<br>OS=Homo<br>sapiens<br>GN=RPL32<br>PE=1 SV=2 -<br>[RL32_HUMAN]                                         | 34.81 | 1 | 6  | 6  | 34  | 0.732 | 0.822 | 0.688 | 0.899 | 88.86  | 34.81 | 10 | 34  | 135  | 15.8  | 11.33 |
| P19784 | Casein kinase<br>II subunit<br>alpha'<br>OS=Homo<br>sapiens<br>GN=CSNK2A2<br>PE=1 SV=1 -<br>[CSK22_HUMAN]                             | 50.57 | 1 | 15 | 17 | 44  | 0.975 | 0.925 | 1.013 | 0.899 | 107.87 | 50.57 | 27 | 44  | 350  | 41.2  | 8.56  |
| P51148 | Ras-related<br>protein Rab-5C<br>OS=Homo<br>sapiens<br>GN=RAB5C<br>PE=1 SV=2 -<br>[RAB5C_HUMAN<br>]                                   | 44.91 | 1 | 5  | 7  | 58  | 0.998 | 0.809 | 0.968 | 0.899 | 178.55 | 44.91 | 12 | 58  | 216  | 23.5  | 8.41  |
| Q06124 | Tyrosine-<br>protein<br>phosphatase<br>non-receptor<br>type 11<br>OS=Homo<br>sapiens<br>GN=PTPN11<br>PE=1 SV=2 -<br>[PTN11_HUMAN<br>] | 39.20 | 1 | 23 | 23 | 90  | 1.030 | 0.908 | 0.964 | 0.899 | 212.42 | 39.20 | 37 | 90  | 597  | 68.4  | 7.30  |
| Q8NFP9 | Neurobeachin<br>OS=Homo<br>sapiens<br>GN=NBEA<br>PE=1 SV=3 -<br>[NBEA_HUMAN]                                                          | 1.05  | 1 | 2  | 3  | 6   | 0.968 | 0.945 | 0.988 | 0.899 | 12.96  | 1.05  | 4  | 6   | 2946 | 327.6 | 6.18  |
| Q9Y2A7 | Nck-associated<br>protein 1<br>OS=Homo<br>sapiens<br>GN=NCKAP1<br>PE=1 SV=1 -<br>[NCKP1_HUMAN<br>]                                    | 18.97 | 2 | 24 | 24 | 101 | 1.111 | 1.058 | 1.037 | 0.900 | 195.98 | 18.97 | 44 | 101 | 1128 | 128.7 | 6.62  |
| O60427 | Fatty acid<br>desaturase 1<br>OS=Homo<br>sapiens<br>GN=FADS1<br>PE=1 SV=3 -<br>[FADS1_HUMAN<br>]                                      | 3.83  | 1 | 2  | 2  | 10  | 0.617 | 0.484 | 0.759 | 0.900 | 12.61  | 3.83  | 4  | 10  | 444  | 51.9  | 8.87  |
| P57058 | Hormonally up-<br>regulated neu-<br>tumor-<br>associated<br>kinase<br>OS=Homo<br>sapiens<br>GN=HUNK<br>PE=1 SV=1 -<br>[HUNK_HUMAN]    | 2.94  | 1 | 1  | 2  | 2   | 1.295 | 0.650 | 0.880 | 0.900 | 1.99   | 2.94  | 2  | 2   | 714  | 79.6  | 9.13  |

|        |                                                                                                                    |       |   |    |    |     |       |       |       |       |        |       |    |     |     |      |      |
|--------|--------------------------------------------------------------------------------------------------------------------|-------|---|----|----|-----|-------|-------|-------|-------|--------|-------|----|-----|-----|------|------|
| Q9UII2 | ATPase inhibitor, mitochondrial<br>OS=Homo sapiens<br>GN=ATPIF1<br>PE=1 SV=1 - [ATIF1_HUMAN]                       | 21.70 | 1 | 3  | 4  | 21  | 0.880 | 1.217 | 1.219 | 0.900 | 41.92  | 21.70 | 6  | 21  | 106 | 12.2 | 9.35 |
| P22061 | Protein-L-isoaspartate(D-aspartate) O-methyltransferase<br>OS=Homo sapiens<br>GN=PCMT1<br>PE=1 SV=4 - [PIMT_HUMAN] | 53.74 | 2 | 15 | 15 | 80  | 1.034 | 1.153 | 1.098 | 0.900 | 183.69 | 53.74 | 24 | 80  | 227 | 24.6 | 7.21 |
| O15258 | Protein RER1<br>OS=Homo sapiens<br>GN=RER1<br>PE=1 SV=1 - [RER1_HUMAN]                                             | 9.18  | 1 | 2  | 2  | 7   | 0.890 | 0.610 | 0.617 | 0.900 | 9.43   | 9.18  | 3  | 7   | 196 | 22.9 | 9.54 |
| O95159 | Zinc finger protein-like 1<br>OS=Homo sapiens<br>GN=ZFPL1<br>PE=1 SV=2 - [ZFPL1_HUMAN]                             | 5.81  | 1 | 1  | 1  | 2   | 0.878 | 0.955 | 1.351 | 0.900 | 4.69   | 5.81  | 2  | 2   | 310 | 34.1 | 8.07 |
| Q96G28 | Cilia- and flagella-associated protein 36<br>OS=Homo sapiens<br>GN=CFAP36<br>PE=1 SV=2 - [CFA36_HUMAN]             | 4.09  | 1 | 1  | 2  | 2   | 0.755 | 1.208 | 1.175 | 0.900 | 4.60   | 4.09  | 2  | 2   | 342 | 39.4 | 4.97 |
| Q9H9Q2 | COP9 signalosome complex subunit 7b<br>OS=Homo sapiens<br>GN=COPS7B<br>PE=1 SV=1 - [CSN7B_HUMAN]                   | 23.48 | 1 | 5  | 5  | 20  | 0.787 | 0.995 | 1.005 | 0.900 | 53.51  | 23.48 | 8  | 20  | 264 | 29.6 | 6.15 |
| P55884 | Eukaryotic translation initiation factor 3 subunit B<br>OS=Homo sapiens<br>GN=EIF3B<br>PE=1 SV=3 - [EIF3B_HUMAN]   | 36.24 | 1 | 27 | 27 | 109 | 0.947 | 0.747 | 0.784 | 0.900 | 294.64 | 36.24 | 45 | 109 | 814 | 92.4 | 5.00 |
| Q9UPT5 | Exocyst complex component 7<br>OS=Homo sapiens<br>GN=EXOC7<br>PE=1 SV=3 - [EXOC7_HUMAN]                            | 39.86 | 1 | 26 | 26 | 94  | 1.153 | 0.984 | 1.149 | 0.900 | 252.70 | 39.86 | 41 | 94  | 735 | 83.3 | 6.79 |
| P25787 | Proteasome subunit alpha type-2<br>OS=Homo sapiens<br>GN=PSMA2<br>PE=1 SV=2 - [PSA2_HUMAN]                         | 51.28 | 1 | 10 | 10 | 55  | 1.049 | 0.991 | 0.953 | 0.900 | 127.55 | 51.28 | 16 | 55  | 234 | 25.9 | 7.43 |

|        |                                                                                                                              |       |   |    |    |     |       |       |       |       |        |       |    |     |      |       |      |
|--------|------------------------------------------------------------------------------------------------------------------------------|-------|---|----|----|-----|-------|-------|-------|-------|--------|-------|----|-----|------|-------|------|
| Q6GQQ9 | OTU domain-containing protein 7B<br>OS=Homo sapiens<br>GN=OTUD7B<br>PE=1 SV=1 - [OTU7B_HUMAN]                                | 3.56  | 2 | 2  | 2  | 6   | 0.913 | 1.244 | 1.067 | 0.900 | 19.70  | 3.56  | 3  | 6   | 843  | 92.5  | 6.71 |
| P21359 | Neurofibromin<br>OS=Homo sapiens<br>GN=NF1 PE=1 SV=2 - [NF1_HUMAN]                                                           | 5.14  | 1 | 16 | 16 | 38  | 0.880 | 0.782 | 0.878 | 0.900 | 84.65  | 5.14  | 22 | 38  | 2839 | 319.2 | 7.39 |
| Q9NSK0 | Kinesin light chain 4<br>OS=Homo sapiens<br>GN=KLC4 PE=1 SV=3 - [KLC4_HUMAN]                                                 | 39.42 | 2 | 17 | 22 | 81  | 0.865 | 1.177 | 1.192 | 0.901 | 196.30 | 39.42 | 35 | 81  | 619  | 68.6  | 6.18 |
| Q15147 | 1-phosphatidylinositol 4,5-bisphosphate phosphodiesterase beta-4<br>OS=Homo sapiens<br>GN=PLCB4<br>PE=1 SV=3 - [PLCB4_HUMAN] | 1.11  | 1 | 1  | 2  | 3   | 1.378 | 0.689 | 0.741 | 0.901 | 6.23   | 1.11  | 2  | 3   | 1175 | 134.4 | 6.90 |
| Q8NF91 | Nesprin-1<br>OS=Homo sapiens<br>GN=SYNE1<br>PE=1 SV=4 - [SYNE1_HUMAN]                                                        | 7.55  | 2 | 52 | 60 | 142 | 0.849 | 1.002 | 1.067 | 0.901 | 297.76 | 7.55  | 84 | 142 | 8797 | ####  | 5.53 |
| Q9NX46 | Poly(ADP-ribose) glycohydrolase ARH3<br>OS=Homo sapiens<br>GN=ADPRHL2<br>PE=1 SV=1 - [ARHL2_HUMAN]                           | 30.30 | 1 | 9  | 9  | 39  | 1.344 | 1.299 | 1.235 | 0.901 | 82.65  | 30.30 | 13 | 39  | 363  | 38.9  | 5.07 |
| Q86YB8 | ERO1-like protein beta<br>OS=Homo sapiens<br>GN=ERO1LB<br>PE=1 SV=2 - [ERO1B_HUMAN]                                          | 8.14  | 1 | 2  | 4  | 8   | 1.006 | 1.015 | 1.400 | 0.901 | 17.05  | 8.14  | 5  | 8   | 467  | 53.5  | 7.99 |
| Q96C01 | Protein FAM136A<br>OS=Homo sapiens<br>GN=FAM136A<br>PE=1 SV=1 - [F136A_HUMAN]                                                | 25.36 | 1 | 4  | 4  | 12  | 0.847 | 1.258 | 0.975 | 0.901 | 26.77  | 25.36 | 7  | 12  | 138  | 15.6  | 7.61 |
| Q9BWD1 | Acetyl-CoA acetyltransferase, cytosolic<br>OS=Homo sapiens<br>GN=ACAT2<br>PE=1 SV=2 - [THIC_HUMAN]                           | 32.49 | 1 | 11 | 12 | 33  | 2.168 | 0.484 | 0.952 | 0.901 | 71.41  | 32.49 | 19 | 33  | 397  | 41.3  | 6.92 |

|        |                                                                                                                                                                                                                                 |       |   |    |    |      |       |       |       |       |         |       |     |      |      |       |       |
|--------|---------------------------------------------------------------------------------------------------------------------------------------------------------------------------------------------------------------------------------|-------|---|----|----|------|-------|-------|-------|-------|---------|-------|-----|------|------|-------|-------|
| P16298 | Serine/threonine-protein phosphatase 2B catalytic subunit beta isoform<br>OS=Homo sapiens<br>GN=PPP3CB<br>PE=1 SV=2 - [PP2BB_HUMAN<br>Heat shock 70 kDa protein 13<br>OS=Homo sapiens<br>GN=HSPA13<br>PE=1 SV=1 - [HSP13_HUMAN] | 19.08 | 1 | 6  | 10 | 40   | 0.790 | 1.584 | 1.456 | 0.901 | 76.19   | 19.08 | 16  | 40   | 524  | 59.0  | 5.91  |
| P48723 | Integrator complex subunit 3<br>OS=Homo sapiens<br>GN=INTS3<br>PE=1 SV=1 - [INT3_HUMAN]                                                                                                                                         | 5.56  | 1 | 4  | 4  | 5    | 0.934 | 0.809 | 0.682 | 0.901 | 11.44   | 5.56  | 4   | 5    | 1043 | 118.0 | 5.80  |
| P18206 | Vinculin<br>OS=Homo sapiens<br>GN=VCL PE=1 SV=4 - [VINC_HUMAN]                                                                                                                                                                  | 71.60 | 1 | 96 | 96 | 1808 | 1.181 | 1.018 | 1.430 | 0.901 | 4384.73 | 71.60 | 165 | 1808 | 1134 | 123.7 | 5.66  |
| P39023 | 60S ribosomal protein L3<br>OS=Homo sapiens<br>GN=RPL3 PE=1 SV=2 - [RL3_HUMAN]                                                                                                                                                  | 36.97 | 1 | 20 | 21 | 154  | 0.797 | 0.784 | 0.688 | 0.901 | 379.09  | 36.97 | 31  | 154  | 403  | 46.1  | 10.18 |
| P09769 | Tyrosine-protein kinase Fgr<br>OS=Homo sapiens<br>GN=FGR PE=1 SV=2 - [FGR_HUMAN]                                                                                                                                                | 4.35  | 6 | 1  | 2  | 12   | 0.646 | 0.766 | 1.148 | 0.902 | 21.80   | 4.35  | 3   | 12   | 529  | 59.4  | 5.59  |
| Q9H3U1 | Protein unc-45 homolog A<br>OS=Homo sapiens<br>GN=UNC45A<br>PE=1 SV=1 - [UN45A_HUMAN]                                                                                                                                           | 38.45 | 1 | 30 | 30 | 87   | 1.032 | 1.153 | 1.141 | 0.902 | 241.64  | 38.45 | 44  | 87   | 944  | 103.0 | 6.07  |
| Q53HC0 | Coiled-coil domain-containing protein 92<br>OS=Homo sapiens<br>GN=CCDC92<br>PE=1 SV=2 - [CCD92_HUMAN]                                                                                                                           | 8.16  | 1 | 2  | 2  | 9    | 1.029 | 1.427 | 1.451 | 0.902 | 12.77   | 8.16  | 4   | 9    | 331  | 36.9  | 8.90  |
| O60499 | Syntaxin-10<br>OS=Homo sapiens<br>GN=STX10<br>PE=1 SV=1 - [STX10_HUMAN]                                                                                                                                                         | 10.84 | 1 | 2  | 2  | 5    | 0.995 | 1.298 | 1.098 | 0.902 | 6.54    | 10.84 | 4   | 5    | 249  | 28.1  | 4.89  |

|        |                                                                                                                                                                                                                                               |       |   |    |    |     |       |       |       |       |        |       |    |     |      |       |       |
|--------|-----------------------------------------------------------------------------------------------------------------------------------------------------------------------------------------------------------------------------------------------|-------|---|----|----|-----|-------|-------|-------|-------|--------|-------|----|-----|------|-------|-------|
| Q9H6Q4 | Cytosolic Fe-S duster assembly factor NARFL<br>OS=Homo sapiens<br>GN=NARFL<br>PE=1 SV=1 - [NARFL_HUMAN<br>Serine/threonine-protein phosphatase 2B catalytic subunit alpha isoform<br>OS=Homo sapiens<br>GN=PPP3CA<br>PE=1 SV=1 - [PP2BA_HUMAN | 1.68  | 1 | 1  | 1  | 1   | 1.299 | 0.867 | 0.973 | 0.902 | 4.06   | 1.68  | 1  | 1   | 476  | 53.0  | 7.23  |
| Q08209 | Nudeolar protein 3<br>OS=Homo sapiens<br>GN=NOL3<br>PE=1 SV=1 - [NOL3_HUMAN                                                                                                                                                                   | 27.26 | 1 | 8  | 12 | 78  | 1.135 | 1.162 | 1.071 | 0.902 | 165.30 | 27.26 | 21 | 78  | 521  | 58.7  | 5.86  |
| O60936 | Zinc finger and SCAN domain-containing protein 25<br>OS=Homo sapiens<br>GN=ZSCAN25<br>PE=2 SV=3 - [ZSCAN25_HUMAN ]<br>NACHT, LRR and PYD domains-containing protein 7<br>OS=Homo sapiens<br>GN=NLRP7<br>PE=1 SV=1 - [NALP7_HUMAN ]            | 26.94 | 1 | 4  | 4  | 7   | 1.146 | 0.890 | 1.382 | 0.902 | 23.27  | 26.94 | 6  | 7   | 219  | 24.3  | 11.33 |
| Q6NSZ9 | Sperm-associated antigen 17<br>OS=Homo sapiens<br>GN=SPAG17<br>PE=1 SV=1 - [SPG17_HUMAN ]                                                                                                                                                     | 2.21  | 1 | 1  | 1  | 2   | 0.635 | 0.594 | 1.119 | 0.902 | 6.21   | 2.21  | 1  | 2   | 544  | 61.4  | 7.72  |
| Q8WX94 | Pyruvate dehydrogenase E1 component subunit alpha, somatic form, mitochondrial<br>OS=Homo sapiens<br>GN=PDHA1<br>PE=1 SV=3 - [ODPA_HUMAN]                                                                                                     | 1.73  | 1 | 1  | 1  | 1   | 0.924 | 1.071 | 0.953 | 0.902 | 0.00   | 1.73  | 1  | 1   | 980  | 111.7 | 6.23  |
| Q6Q759 | Dynactin subunit 1<br>OS=Homo sapiens<br>GN=DCTN1<br>PE=1 SV=3 - [DCTN1_HUMAN ]                                                                                                                                                               | 0.36  | 1 | 1  | 1  | 1   | 0.583 | 0.499 | 0.569 | 0.902 | 2.11   | 0.36  | 1  | 1   | 2223 | 251.6 | 6.24  |
| P08559 |                                                                                                                                                                                                                                               | 50.00 | 2 | 21 | 21 | 87  | 0.972 | 1.006 | 0.972 | 0.902 | 181.13 | 50.00 | 36 | 87  | 390  | 43.3  | 8.06  |
| Q14203 |                                                                                                                                                                                                                                               | 38.97 | 4 | 43 | 46 | 187 | 1.094 | 1.043 | 0.974 | 0.902 | 495.74 | 38.97 | 74 | 187 | 1278 | 141.6 | 5.81  |



|        |                                                                                                                                |       |   |    |    |    |       |       |       |       |        |       |    |    |      |       |      |
|--------|--------------------------------------------------------------------------------------------------------------------------------|-------|---|----|----|----|-------|-------|-------|-------|--------|-------|----|----|------|-------|------|
| Q9NQY0 | Bridging integrator 3<br>OS=Homo sapiens<br>GN=BIN3 PE=1 SV=1 - [BIN3_HUMAN]                                                   | 28.06 | 1 | 7  | 7  | 14 | 0.914 | 1.407 | 1.272 | 0.902 | 24.14  | 28.06 | 9  | 14 | 253  | 29.6  | 7.47 |
| P40763 | Signal transducer and activator of transcription 3<br>OS=Homo sapiens<br>GN=STAT3 PE=1 SV=2 - [STAT3_HUMAN]                    | 33.77 | 1 | 21 | 23 | 75 | 1.377 | 1.216 | 1.086 | 0.902 | 194.47 | 33.77 | 32 | 75 | 770  | 88.0  | 6.30 |
| Q93062 | RNA-binding protein with multiple splicing<br>OS=Homo sapiens<br>GN=RBPMS PE=1 SV=1 - [RBPMS_HUMAN]                            | 41.84 | 2 | 7  | 7  | 32 | 1.176 | 1.729 | 1.274 | 0.902 | 94.98  | 41.84 | 9  | 32 | 196  | 21.8  | 8.07 |
| Q5VUJ6 | Leucine-rich repeat and calponin homology domain-containing protein 2<br>OS=Homo sapiens<br>GN=LRCH2 PE=2 SV=2 - [LRCH2_HUMAN] | 2.09  | 1 | 1  | 1  | 1  | 1.310 | 1.848 | 0.915 | 0.903 | 3.93   | 2.09  | 1  | 1  | 765  | 84.5  | 6.55 |
| Q9Y623 | Myosin-4<br>OS=Homo sapiens<br>GN=MYH4 PE=1 SV=2 - [MYH4_HUMAN]                                                                | 5.52  | 2 | 1  | 12 | 86 | 0.509 | 0.834 | 0.931 | 0.903 | 164.69 | 5.52  | 15 | 86 | 1939 | 222.9 | 5.85 |
| Q8NB37 | Parkinson disease 7 domain-containing protein 1<br>OS=Homo sapiens<br>GN=PDDC1 PE=1 SV=1 - [PDDC1_HUMAN]                       | 22.73 | 1 | 4  | 4  | 8  | 0.964 | 1.522 | 1.001 | 0.903 | 27.58  | 22.73 | 5  | 8  | 220  | 23.3  | 6.61 |
| Q5TID7 | Coiled-coil domain-containing protein 181<br>OS=Homo sapiens<br>GN=CCDC181 PE=2 SV=1 - [CC181_HUMAN]                           | 1.77  | 1 | 1  | 1  | 1  | 0.926 | 0.594 | 0.898 | 0.903 | 0.00   | 1.77  | 1  | 1  | 509  | 60.1  | 5.91 |
| P55036 | 26S proteasome non-ATPase regulatory subunit 4<br>OS=Homo sapiens<br>GN=PSMD4 PE=1 SV=1 - [PSMD4_HUMAN]                        | 28.38 | 1 | 8  | 9  | 78 | 0.862 | 1.087 | 1.011 | 0.903 | 179.56 | 28.38 | 16 | 78 | 377  | 40.7  | 4.79 |

|        |                                                                                                                             |       |   |    |     |     |       |       |       |       |         |       |     |     |      |       |      |
|--------|-----------------------------------------------------------------------------------------------------------------------------|-------|---|----|-----|-----|-------|-------|-------|-------|---------|-------|-----|-----|------|-------|------|
| Q8N3F8 | MICAL-like protein 1<br>OS=Homo sapiens<br>GN=MICALL1<br>PE=1 SV=2 - [MILK1_HUMAN]                                          | 18.31 | 1 | 10 | 10  | 19  | 1.060 | 1.047 | 1.182 | 0.903 | 52.55   | 18.31 | 12  | 19  | 863  | 93.4  | 7.25 |
| P35813 | Protein phosphatase 1A<br>OS=Homo sapiens<br>GN=PPM1A<br>PE=1 SV=1 - [PPM1A_HUMAN]                                          | 32.20 | 1 | 12 | 14  | 57  | 1.014 | 1.052 | 1.426 | 0.903 | 120.19  | 32.20 | 25  | 57  | 382  | 42.4  | 5.36 |
| Q96G23 | Ceramide synthase 2<br>OS=Homo sapiens<br>GN=CERS2<br>PE=1 SV=1 - [CERS2_HUMAN]                                             | 7.11  | 1 | 3  | 3   | 9   | 0.989 | 0.862 | 0.626 | 0.903 | 16.52   | 7.11  | 4   | 9   | 380  | 44.8  | 8.98 |
| Q8N155 | Zinc transporter ZIP11<br>OS=Homo sapiens<br>GN=SLC39A11<br>PE=2 SV=3 - [S39AB_HUMAN]                                       | 7.60  | 1 | 1  | 2   | 3   | 1.243 | 0.702 | 0.796 | 0.903 | 11.01   | 7.60  | 2   | 3   | 342  | 35.4  | 5.60 |
| Q9UI09 | NADH dehydrogenase [ubiquinone] 1 alpha subcomplex subunit 12<br>OS=Homo sapiens<br>GN=NDUFA12<br>PE=1 SV=1 - [NDUAC_HUMAN] | 62.76 | 1 | 7  | 7   | 23  | 0.559 | 0.821 | 0.776 | 0.903 | 55.96   | 62.76 | 12  | 23  | 145  | 17.1  | 9.63 |
| Q6PJG2 | ELM2 and SANT domain-containing protein 1<br>OS=Homo sapiens<br>GN=ELMSAN1<br>PE=1 SV=2 - [EMSA1_HUMAN]                     | 3.44  | 1 | 2  | 2   | 5   | 1.326 | 1.517 | 1.443 | 0.903 | 2.30    | 3.44  | 2   | 5   | 1045 | 114.9 | 9.19 |
| P78559 | Microtubule-associated protein 1A<br>OS=Homo sapiens<br>GN=MAP1A<br>PE=1 SV=6 - [MAP1A_HUMAN]                               | 37.71 | 1 | 99 | 100 | 391 | 0.894 | 0.782 | 1.044 | 0.903 | 1039.79 | 37.71 | 143 | 391 | 2803 | 305.3 | 4.92 |
| O95260 | Arginyl-tRNA--protein transferase 1<br>OS=Homo sapiens<br>GN=ATE1<br>PE=1 SV=2 - [ATE1_HUMAN]                               | 16.02 | 1 | 7  | 7   | 18  | 1.225 | 0.987 | 0.913 | 0.903 | 38.84   | 16.02 | 9   | 18  | 518  | 59.1  | 7.93 |

|        |                                                                                                       |       |   |    |    |     |       |       |       |       |         |       |    |     |     |      |      |
|--------|-------------------------------------------------------------------------------------------------------|-------|---|----|----|-----|-------|-------|-------|-------|---------|-------|----|-----|-----|------|------|
| O00238 | Bone morphogenetic protein receptor type-1B OS=Homo sapiens<br>GN=BMPR1B<br>PE=1 SV=1 - [BMR1B_HUMAN] | 3.78  | 1 | 1  | 1  | 1   | 0.697 | 1.024 | 0.847 | 0.903 | 0.00    | 3.78  | 1  | 1   | 502 | 56.9 | 7.66 |
| P54886 | Delta-1-pyrroline-5-carboxylate synthase OS=Homo sapiens<br>GN=ALDH18A1<br>PE=1 SV=2 - [P5CS_HUMAN]   | 45.53 | 1 | 35 | 35 | 162 | 0.716 | 0.765 | 0.786 | 0.904 | 342.30  | 45.53 | 59 | 162 | 795 | 87.2 | 7.12 |
| P00387 | NADH-cytochrome b5 reductase 3 OS=Homo sapiens<br>GN=CYB5R3<br>PE=1 SV=3 - [NBSR3_HUMAN]              | 53.82 | 1 | 15 | 15 | 102 | 1.144 | 0.960 | 1.119 | 0.904 | 217.27  | 53.82 | 25 | 102 | 301 | 34.2 | 7.59 |
| Q9NWX4 | UPF0587 protein C1orf123 OS=Homo sapiens<br>GN=C1orf123<br>PE=1 SV=1 - [CA123_HUMAN]                  | 58.75 | 1 | 8  | 8  | 52  | 0.969 | 0.951 | 0.871 | 0.904 | 119.74  | 58.75 | 14 | 52  | 160 | 18.0 | 5.01 |
| Q9BXS4 | Transmembrane protein 59 OS=Homo sapiens<br>GN=TMEM59<br>PE=1 SV=1 - [TMM59_HUMAN]                    | 6.19  | 1 | 2  | 2  | 2   | 0.741 | 0.683 | 0.889 | 0.904 | 1.94    | 6.19  | 2  | 2   | 323 | 36.2 | 5.10 |
| Q9Y5K8 | V-type proton ATPase subunit D OS=Homo sapiens<br>GN=ATP6V1D<br>PE=1 SV=1 - [VATD_HUMAN]              | 58.30 | 1 | 12 | 13 | 31  | 0.850 | 0.846 | 0.886 | 0.904 | 90.27   | 58.30 | 18 | 31  | 247 | 28.2 | 9.36 |
| P05388 | 60S acidic ribosomal protein P0 OS=Homo sapiens<br>GN=RPLP0<br>PE=1 SV=1 - [RLA0_HUMAN]               | 41.96 | 2 | 15 | 15 | 190 | 0.906 | 1.061 | 0.974 | 0.904 | 365.40  | 41.96 | 25 | 190 | 317 | 34.3 | 5.97 |
| Q9HAS0 | Protein Njmu-R1 OS=Homo sapiens<br>GN=C17orf75<br>PE=1 SV=2 - [NIMU_HUMAN]                            | 9.09  | 1 | 4  | 4  | 10  | 1.044 | 1.093 | 0.852 | 0.904 | 20.49   | 9.09  | 6  | 10  | 396 | 44.6 | 5.03 |
| P62158 | Calmodulin OS=Homo sapiens<br>GN=CALM1<br>PE=1 SV=2 - [CALM_HUMAN]                                    | 83.22 | 3 | 13 | 13 | 491 | 1.302 | 1.005 | 1.082 | 0.904 | 1322.98 | 83.22 | 24 | 491 | 149 | 16.8 | 4.22 |

|        |                                                                                                                                |       |   |    |    |     |       |       |       |       |        |       |    |     |     |      |      |
|--------|--------------------------------------------------------------------------------------------------------------------------------|-------|---|----|----|-----|-------|-------|-------|-------|--------|-------|----|-----|-----|------|------|
| O43633 | Charged multivesicular body protein 2a OS=Homo sapiens<br>GN=CHMP2A<br>PE=1 SV=1 - [CHM2A_HUMAN]                               | 33.33 | 2 | 10 | 10 | 19  | 1.192 | 1.047 | 1.008 | 0.904 | 43.71  | 33.33 | 16 | 19  | 222 | 25.1 | 5.97 |
| Q9NTK5 | Obg-like ATPase 1 OS=Homo sapiens<br>GN=OLA1<br>PE=1 SV=2 - [OLA1_HUMAN]                                                       | 48.23 | 1 | 17 | 17 | 110 | 0.936 | 1.077 | 0.896 | 0.904 | 268.03 | 48.23 | 30 | 110 | 396 | 44.7 | 7.81 |
| Q2TAA5 | GDP-Man:Man(3)GlcNAc(2)-PP-Dol alpha-1,2-mannosyltransferase OS=Homo sapiens<br>GN=ALG11<br>PE=1 SV=2 - [ALG11_HUMAN]          | 3.25  | 1 | 3  | 3  | 8   | 0.990 | 0.711 | 0.967 | 0.904 | 14.84  | 3.25  | 5  | 8   | 492 | 55.6 | 8.48 |
| Q10469 | Alpha-1,6-mannosylglycoprotein 2-beta-N-acetylglucosaminyltransferase OS=Homo sapiens<br>GN=MGAT2<br>PE=1 SV=1 - [MGAT2_HUMAN] | 11.63 | 1 | 4  | 4  | 9   | 0.931 | 0.892 | 0.726 | 0.904 | 22.04  | 11.63 | 7  | 9   | 447 | 51.5 | 8.76 |
| P20618 | Proteasome subunit beta type-1 OS=Homo sapiens<br>GN=PSMB1<br>PE=1 SV=2 - [PSB1_HUMAN]                                         | 51.04 | 1 | 10 | 10 | 70  | 0.980 | 0.877 | 0.890 | 0.904 | 152.21 | 51.04 | 18 | 70  | 241 | 26.5 | 8.13 |
| Q8IWR1 | Tripartite motif-containing protein 59 OS=Homo sapiens<br>GN=TRIM59<br>PE=2 SV=1 - [TRI59_HUMAN]                               | 9.43  | 1 | 3  | 3  | 7   | 1.735 | 0.997 | 0.905 | 0.904 | 16.72  | 9.43  | 4  | 7   | 403 | 47.1 | 6.81 |
| Q9NP97 | Dynein light chain roadblock type 1 OS=Homo sapiens<br>GN=DYNLRB1<br>PE=1 SV=3 - [DLRB1_HUMAN]                                 | 29.17 | 2 | 2  | 2  | 23  | 0.893 | 0.998 | 0.999 | 0.905 | 42.37  | 29.17 | 4  | 23  | 96  | 10.9 | 7.25 |
| P63165 | Small ubiquitin-related modifier 1 OS=Homo sapiens<br>GN=SUMO1<br>PE=1 SV=1 - [SUMO1_HUMAN]                                    | 40.59 | 1 | 5  | 5  | 22  | 1.403 | 1.190 | 0.936 | 0.905 | 38.89  | 40.59 | 8  | 22  | 101 | 11.5 | 5.52 |

|        |                                                                                                                                                                                                                               |       |   |    |    |     |       |       |       |       |        |       |    |     |      |       |      |
|--------|-------------------------------------------------------------------------------------------------------------------------------------------------------------------------------------------------------------------------------|-------|---|----|----|-----|-------|-------|-------|-------|--------|-------|----|-----|------|-------|------|
| Q8WWH5 | Probable tRNA<br>pseudouridine<br>synthase 1<br>OS=Homo<br>sapiens<br>GN=TRUB1<br>PE=1 SV=1 -<br>[TRUB1_HUMAN<br>]<br>Uridine-cytidine<br>kinase-like 1<br>OS=Homo<br>sapiens<br>GN=UCKL1<br>PE=1 SV=2 -<br>[UCKL1_HUMAN<br>] | 8.02  | 1 | 3  | 3  | 4   | 0.908 | 1.146 | 0.893 | 0.905 | 5.01   | 8.02  | 4  | 4   | 349  | 37.2  | 8.25 |
| Q9NWZ5 | Peroxisome<br>assembly factor 1<br>OS=Homo<br>sapiens<br>GN=UCKL1<br>PE=1 SV=2 -<br>[UCKL1_HUMAN<br>]                                                                                                                         | 7.30  | 1 | 3  | 3  | 3   | 1.148 | 0.869 | 0.928 | 0.905 | 8.60   | 7.30  | 3  | 3   | 548  | 61.1  | 7.36 |
| P30041 | Peroxisome<br>assembly factor 6<br>OS=Homo<br>sapiens<br>GN=PRDX6<br>PE=1 SV=3 -<br>[PRDX6_HUMAN<br>]                                                                                                                         | 63.39 | 1 | 22 | 22 | 373 | 1.159 | 0.677 | 1.129 | 0.905 | 809.29 | 63.39 | 36 | 373 | 224  | 25.0  | 6.38 |
| P60953 | Cell division<br>control protein<br>42 homolog<br>OS=Homo<br>sapiens<br>GN=CDC42<br>PE=1 SV=2 -<br>[CDC42_HUMAN<br>]                                                                                                          | 68.59 | 2 | 8  | 9  | 88  | 0.947 | 1.055 | 0.995 | 0.905 | 277.54 | 68.59 | 14 | 88  | 191  | 21.2  | 6.55 |
| Q96EV8 | Dysbindin<br>OS=Homo<br>sapiens<br>GN=DTBP1<br>PE=1 SV=1 -<br>[DTBP1_HUMAN<br>]                                                                                                                                               | 21.94 | 1 | 7  | 7  | 17  | 0.755 | 1.058 | 0.960 | 0.905 | 36.87  | 21.94 | 13 | 17  | 351  | 39.5  | 4.67 |
| Q9H4G4 | Golgi-<br>associated<br>plant<br>pathogenesis-<br>related protein<br>1 OS=Homo<br>sapiens<br>GN=GLIPR2<br>PE=1 SV=3 -<br>[GAPR1_HUMAN<br>]                                                                                    | 55.84 | 1 | 7  | 7  | 29  | 1.130 | 1.016 | 0.792 | 0.905 | 86.13  | 55.84 | 11 | 29  | 154  | 17.2  | 9.41 |
| A0AVT1 | Ubiquitin-like<br>modifier-<br>activating<br>enzyme 6<br>OS=Homo<br>sapiens<br>GN=UBA6<br>PE=1 SV=1 -<br>[UBA6_HUMAN<br>]                                                                                                     | 26.52 | 2 | 24 | 25 | 84  | 1.017 | 1.187 | 1.111 | 0.905 | 197.36 | 26.52 | 41 | 84  | 1052 | 117.9 | 6.14 |
| Q9NWK9 | Box C/D<br>snoRNA protein<br>1 OS=Homo<br>sapiens<br>GN=ZNHIT6<br>PE=1 SV=1 -<br>[BCD1_HUMAN<br>]                                                                                                                             | 4.26  | 1 | 1  | 1  | 1   | 1.647 | 0.856 | 1.170 | 0.905 | 0.00   | 4.26  | 1  | 1   | 470  | 53.9  | 5.80 |
| Q96AG4 | Leucine-rich<br>repeat-<br>containing<br>protein 59<br>OS=Homo<br>sapiens<br>GN=LRRCS9<br>PE=1 SV=1 -<br>[LRC59_HUMAN<br>]                                                                                                    | 37.79 | 1 | 15 | 15 | 92  | 0.734 | 0.975 | 0.991 | 0.905 | 172.65 | 37.79 | 23 | 92  | 307  | 34.9  | 9.57 |

|        |                                                                                                                                                                                                                           |       |   |    |    |    |       |       |       |       |        |       |    |    |     |      |      |
|--------|---------------------------------------------------------------------------------------------------------------------------------------------------------------------------------------------------------------------------|-------|---|----|----|----|-------|-------|-------|-------|--------|-------|----|----|-----|------|------|
| Q32MZ4 | Leucine-rich repeat flightless-interacting protein 1<br>OS=Homo sapiens<br>GN=LRRFIP1<br>PE=1 SV=2 - [LRRF1_HUMAN<br>E3 ubiquitin-protein ligase<br>TRIM13<br>OS=Homo sapiens<br>GN=TRIM13<br>PE=1 SV=2 - [TRIM13_HUMAN ] | 24.38 | 1 | 15 | 17 | 99 | 0.665 | 0.975 | 0.887 | 0.905 | 302.69 | 24.38 | 25 | 99 | 808 | 89.2 | 4.65 |
| O60858 | 39S ribosomal protein L19, mitochondrial<br>OS=Homo sapiens<br>GN=MRPL19<br>PE=1 SV=2 - [RM19_HUMAN]                                                                                                                      | 1.72  | 1 | 1  | 1  | 3  | 0.659 | 0.753 | 0.817 | 0.905 | 5.41   | 1.72  | 2  | 3  | 407 | 47.0 | 6.01 |
| P49406 | Myosin light chain kinase 3<br>OS=Homo sapiens<br>GN=MYLK3<br>PE=2 SV=3 - [MYLK3_HUMAN ]                                                                                                                                  | 20.21 | 1 | 6  | 6  | 18 | 0.900 | 0.884 | 0.839 | 0.905 | 43.13  | 20.21 | 10 | 18 | 292 | 33.5 | 9.50 |
| Q32MK0 | Dynactin subunit 4<br>OS=Homo sapiens<br>GN=DCTN4<br>PE=1 SV=1 - [DCTN4_HUMAN ]                                                                                                                                           | 6.35  | 3 | 2  | 3  | 5  | 1.124 | 0.753 | 0.759 | 0.906 | 6.59   | 6.35  | 4  | 5  | 819 | 88.3 | 6.11 |
| Q9UJW0 | Transcription factor SOX-11<br>OS=Homo sapiens<br>GN=SOX11<br>PE=1 SV=2 - [SOX11_HUMAN ]                                                                                                                                  | 29.35 | 1 | 10 | 10 | 39 | 1.203 | 1.087 | 1.041 | 0.906 | 95.35  | 29.35 | 16 | 39 | 460 | 52.3 | 7.34 |
| P35716 | Ubiquitin-conjugating enzyme E2 variant 3<br>OS=Homo sapiens<br>GN=UEVLD<br>PE=1 SV=2 - [UEVLD_HUMAN ]                                                                                                                    | 4.08  | 1 | 1  | 1  | 1  | 1.843 | 1.394 | 1.379 | 0.906 | 2.62   | 4.08  | 1  | 1  | 441 | 46.7 | 5.05 |
| Q8IX04 | Myotubularin-related protein 10<br>OS=Homo sapiens<br>GN=MTMR10<br>PE=1 SV=3 - [MTMRA_HUMAN ]                                                                                                                             | 14.44 | 1 | 5  | 5  | 6  | 0.836 | 1.048 | 1.304 | 0.906 | 8.74   | 14.44 | 5  | 6  | 471 | 52.2 | 7.09 |
| Q9NXD2 | Alpha-endosulfine<br>OS=Homo sapiens<br>GN=ENSA<br>PE=1 SV=1 - [ENSA_HUMAN]                                                                                                                                               | 4.76  | 1 | 4  | 4  | 8  | 1.012 | 1.018 | 1.143 | 0.906 | 19.34  | 4.76  | 5  | 8  | 777 | 88.2 | 8.53 |
| O43768 |                                                                                                                                                                                                                           | 60.33 | 1 | 7  | 8  | 33 | 1.224 | 1.506 | 1.009 | 0.906 | 82.53  | 60.33 | 12 | 33 | 121 | 13.4 | 7.24 |

|        |                                                                                                                  |       |   |    |    |     |       |       |       |       |        |       |    |     |      |       |      |
|--------|------------------------------------------------------------------------------------------------------------------|-------|---|----|----|-----|-------|-------|-------|-------|--------|-------|----|-----|------|-------|------|
| Q13574 | Diaclycerol kinase zeta<br>OS=Homo sapiens<br>GN=DGKZ<br>PE=1 SV=3 - [DGKZ_HUMAN]                                | 6.36  | 1 | 4  | 5  | 8   | 0.657 | 1.316 | 1.383 | 0.906 | 15.76  | 6.36  | 5  | 8   | 1117 | 124.1 | 9.04 |
| P61019 | Ras-related protein Rab-2A<br>OS=Homo sapiens<br>GN=RAB2A<br>PE=1 SV=1 - [RAB2A_HUMAN]                           | 53.77 | 1 | 5  | 10 | 59  | 0.825 | 0.976 | 0.801 | 0.906 | 127.96 | 53.77 | 18 | 59  | 212  | 23.5  | 6.54 |
| O15212 | Prefoldin subunit 6<br>OS=Homo sapiens<br>GN=PF6<br>PE=1 SV=1 - [PF6_HUMAN]                                      | 34.88 | 1 | 8  | 8  | 32  | 0.781 | 1.141 | 0.992 | 0.906 | 75.88  | 34.88 | 14 | 32  | 129  | 14.6  | 8.88 |
| P07686 | Beta-hexosaminidase subunit beta<br>OS=Homo sapiens<br>GN=HEXB<br>PE=1 SV=3 - [HEXB_HUMAN]                       | 37.59 | 1 | 20 | 22 | 176 | 0.814 | 1.250 | 1.030 | 0.906 | 532.43 | 37.59 | 36 | 176 | 556  | 63.1  | 6.76 |
| Q63HN1 | Protein FAM205B<br>OS=Homo sapiens<br>GN=FAM205B<br>PE=2 SV=1 - [F205B_HUMAN]                                    | 2.88  | 1 | 1  | 1  | 1   | 1.278 | 0.998 | 1.365 | 0.906 | 0.00   | 2.88  | 1  | 1   | 556  | 61.8  | 7.50 |
| P12235 | ADP/ATP translocase 1<br>OS=Homo sapiens<br>GN=SLC25A4<br>PE=1 SV=4 - [ADT1_HUMAN]                               | 43.29 | 2 | 4  | 15 | 87  | 1.200 | 1.037 | 0.897 | 0.906 | 227.04 | 43.29 | 22 | 87  | 298  | 33.0  | 9.76 |
| P41223 | Protein BUD31 homolog<br>OS=Homo sapiens<br>GN=BUD31<br>PE=1 SV=2 - [BUD31_HUMAN]                                | 13.89 | 1 | 1  | 1  | 2   | 1.408 | 0.977 | 1.406 | 0.907 | 5.09   | 13.89 | 1  | 2   | 144  | 17.0  | 8.82 |
| Q9Y4C1 | Lysine-specific demethylase 3A<br>OS=Homo sapiens<br>GN=KDM3A<br>PE=1 SV=4 - [KDM3A_HUMAN]                       | 0.45  | 1 | 1  | 1  | 2   | 1.138 | 0.808 | 0.777 | 0.907 | 3.45   | 0.45  | 1  | 2   | 1321 | 147.2 | 8.07 |
| Q8N8Z6 | Discoidin, CUB and LCCL domain-containing protein 1<br>OS=Homo sapiens<br>GN=DCBLD1<br>PE=1 SV=2 - [DCBD1_HUMAN] | 5.87  | 1 | 3  | 3  | 3   | 0.969 | 1.239 | 0.837 | 0.907 | 7.63   | 5.87  | 3  | 3   | 715  | 77.9  | 8.05 |

|        |                                                                                                                                                                                                    |       |   |   |    |     |       |       |       |       |        |       |    |     |      |       |      |
|--------|----------------------------------------------------------------------------------------------------------------------------------------------------------------------------------------------------|-------|---|---|----|-----|-------|-------|-------|-------|--------|-------|----|-----|------|-------|------|
| Q8N514 | Dehydrogenase<br>/reductase SDR<br>family member<br>on<br>chromosome X<br>OS=Homo<br>sapiens<br>GN=DHRSX<br>PE=2 SV=2 -<br>[DHRSX_HUMAN<br>]<br>Aldehyde<br>dehydrogenase<br>family 3<br>member B2 | 11.82 | 1 | 3 | 3  | 6   | 0.783 | 0.575 | 0.716 | 0.907 | 8.83   | 11.82 | 5  | 6   | 330  | 36.4  | 9.00 |
| P48448 | OS=Homo<br>sapiens<br>GN=ALDH3B2<br>PE=2 SV=3 -<br>[AL3B2_HUMAN<br>]<br>STAM-binding<br>protein                                                                                                    | 3.12  | 1 | 1 | 1  | 13  | 1.194 | 0.078 | 0.786 | 0.907 | 17.91  | 3.12  | 2  | 13  | 385  | 42.6  | 5.99 |
| O95630 | OS=Homo<br>sapiens<br>GN=STABBP<br>PE=1 SV=1 -<br>[STABP_HUMAN<br>]<br>Ras-related<br>protein Rap-1A                                                                                               | 20.75 | 1 | 7 | 7  | 15  | 1.049 | 0.927 | 0.929 | 0.908 | 38.69  | 20.75 | 10 | 15  | 424  | 48.0  | 6.29 |
| P62834 | OS=Homo<br>sapiens<br>GN=RAP1A<br>PE=1 SV=1 -<br>[RAP1A_HUMAN<br>]<br>28 kDa heat-<br>and acid-stable<br>phosphoprotei<br>n                                                                        | 51.09 | 1 | 1 | 9  | 152 | 0.945 | 1.247 | 1.065 | 0.908 | 392.74 | 51.09 | 14 | 152 | 184  | 21.0  | 6.67 |
| Q13442 | OS=Homo<br>sapiens<br>GN=PDAP1<br>PE=1 SV=1 -<br>[HAP28_HUMAN<br>]<br>Menin                                                                                                                        | 29.28 | 1 | 9 | 9  | 60  | 1.001 | 1.393 | 1.045 | 0.908 | 140.36 | 29.28 | 15 | 60  | 181  | 20.6  | 8.87 |
| O00255 | OS=Homo<br>sapiens<br>GN=MEN1<br>PE=1 SV=4 -<br>[MEN1_HUMAN]                                                                                                                                       | 2.28  | 1 | 1 | 1  | 2   | 0.860 | 1.479 | 1.044 | 0.908 | 3.35   | 2.28  | 2  | 2   | 615  | 68.0  | 6.55 |
| Q9Y216 | Ninein-like<br>protein<br>OS=Homo<br>sapiens<br>GN=NINL PE=1<br>SV=2 -<br>[NINL_HUMAN]                                                                                                             | 1.01  | 1 | 1 | 2  | 4   | 1.000 | 0.941 | 0.618 | 0.908 | 7.89   | 1.01  | 2  | 4   | 1382 | 156.2 | 5.06 |
| Q81WV8 | E3 ubiquitin-<br>protein ligase<br>UBR2<br>OS=Homo<br>sapiens<br>GN=UBR2<br>PE=1 SV=1 -<br>[UBR2_HUMAN]                                                                                            | 4.84  | 1 | 8 | 8  | 25  | 0.862 | 1.045 | 0.780 | 0.908 | 56.50  | 4.84  | 11 | 25  | 1755 | 200.4 | 6.24 |
| Q3ZCM7 | Tubulin beta-8<br>chain<br>OS=Homo<br>sapiens<br>GN=TUBB8<br>PE=1 SV=2 -<br>[TBB8_HUMAN]                                                                                                           | 28.15 | 1 | 1 | 11 | 306 | 0.847 | 6.587 | 2.104 | 0.908 | 514.20 | 28.15 | 18 | 306 | 444  | 49.7  | 4.89 |



|        |                                                                                                                        |       |   |    |    |     |       |       |       |       |        |       |    |     |     |       |       |
|--------|------------------------------------------------------------------------------------------------------------------------|-------|---|----|----|-----|-------|-------|-------|-------|--------|-------|----|-----|-----|-------|-------|
| Q9Y4K0 | Lysyl oxidase<br>homolog 2<br>OS=Homo<br>sapiens<br>GN=LOXL2<br>PE=1 SV=1 -<br>[LOXL2_HUMAN<br>]                       | 11.63 | 1 | 9  | 9  | 27  | 0.627 | 0.647 | 1.327 | 0.908 | 66.03  | 11.63 | 15 | 27  | 774 | 86.7  | 6.38  |
| Q13164 | Mitogen-<br>activated<br>protein kinase<br>7 OS=Homo<br>sapiens<br>GN=MAPK7<br>PE=1 SV=2 -<br>[MK07_HUMAN]             | 8.70  | 2 | 5  | 6  | 16  | 0.953 | 1.057 | 1.072 | 0.908 | 28.29  | 8.70  | 10 | 16  | 816 | 88.3  | 5.88  |
| Q86TU7 | Histone-lysine N-<br>methyltransfer<br>ase setd3<br>OS=Homo<br>sapiens<br>GN=SETD3<br>PE=1 SV=1 -<br>[SETD3_HUMAN<br>] | 18.01 | 1 | 9  | 9  | 22  | 0.751 | 0.873 | 1.092 | 0.908 | 47.89  | 18.01 | 13 | 22  | 594 | 67.2  | 5.96  |
| P0D007 | Protein<br>PET100<br>homolog,<br>mitochondrial<br>OS=Homo<br>sapiens<br>GN=PET100<br>PE=1 SV=1 -<br>[PT100_HUMAN]      | 13.70 | 1 | 1  | 1  | 1   | 1.192 | 1.156 | 0.932 | 0.908 | 3.71   | 13.70 | 1  | 1   | 73  | 9.1   | 6.77  |
| Q96PU8 | Protein<br>quaking<br>OS=Homo<br>sapiens<br>GN=QKI PE=1<br>SV=1 -<br>[QKI_HUMAN]                                       | 25.51 | 1 | 8  | 8  | 19  | 1.145 | 1.099 | 0.787 | 0.908 | 41.36  | 25.51 | 13 | 19  | 341 | 37.6  | 8.56  |
| O43264 | Centromere/kin<br>etochore<br>protein zw10<br>homolog<br>OS=Homo<br>sapiens<br>GN=ZW10<br>PE=1 SV=3 -<br>[ZW10_HUMAN]  | 11.04 | 2 | 7  | 8  | 53  | 0.810 | 0.838 | 0.777 | 0.908 | 115.51 | 11.04 | 11 | 53  | 779 | 88.8  | 6.27  |
| P55786 | Puromycin-<br>sensitive<br>aminopeptidas<br>e OS=Homo<br>sapiens<br>GN=NPEPPS<br>PE=1 SV=2 -<br>[PSA_HUMAN]            | 39.28 | 2 | 38 | 38 | 186 | 1.048 | 1.014 | 0.996 | 0.908 | 394.70 | 39.28 | 63 | 186 | 919 | 103.2 | 5.72  |
| P62841 | 40S ribosomal<br>protein S15<br>OS=Homo<br>sapiens<br>GN=RPS15<br>PE=1 SV=2 -<br>[RS15_HUMAN]                          | 42.07 | 1 | 5  | 5  | 48  | 0.916 | 1.023 | 1.042 | 0.908 | 115.52 | 42.07 | 7  | 48  | 145 | 17.0  | 10.39 |
| Q92930 | Ras-related<br>protein Rab-8B<br>OS=Homo<br>sapiens<br>GN=RAB8B<br>PE=1 SV=2 -<br>[RAB8B_HUMAN<br>]                    | 57.49 | 2 | 5  | 13 | 80  | 1.240 | 1.036 | 0.657 | 0.908 | 170.27 | 57.49 | 20 | 80  | 207 | 23.6  | 9.07  |

|        |                                                                                                                 |       |   |    |    |     |       |       |       |       |        |       |    |     |      |       |       |
|--------|-----------------------------------------------------------------------------------------------------------------|-------|---|----|----|-----|-------|-------|-------|-------|--------|-------|----|-----|------|-------|-------|
| Q9NYU2 | UDP-glucose:glycoprotein glucosyltransferase 1<br>OS=Homo sapiens<br>GN=UGGT1<br>PE=1 SV=3 - [UGGT1_HUMAN]      | 36.85 | 1 | 46 | 48 | 225 | 0.924 | 1.024 | 0.974 | 0.908 | 562.93 | 36.85 | 76 | 225 | 1555 | 177.1 | 5.63  |
| Q9NXE4 | Sphingomyelin phosphodiesterase 4<br>OS=Homo sapiens<br>GN=SMPD4<br>PE=1 SV=2 - [NSMA3_HUMAN]                   | 13.06 | 1 | 9  | 9  | 15  | 1.044 | 1.062 | 0.791 | 0.909 | 22.58  | 13.06 | 14 | 15  | 827  | 93.3  | 7.97  |
| Q14934 | Nuclear factor of activated T-cells, cytoplasmic 4<br>OS=Homo sapiens<br>GN=NFATC4<br>PE=1 SV=2 - [NFAC4_HUMAN] | 2.55  | 1 | 2  | 2  | 4   | 1.073 | 1.101 | 1.048 | 0.909 | 6.83   | 2.55  | 2  | 4   | 902  | 95.4  | 5.38  |
| P10620 | Microsomal glutathione S-transferase 1<br>OS=Homo sapiens<br>GN=MGST1<br>PE=1 SV=1 - [MGST1_HUMAN]              | 12.26 | 1 | 4  | 4  | 56  | 1.116 | 0.649 | 0.748 | 0.909 | 126.85 | 12.26 | 7  | 56  | 155  | 17.6  | 9.39  |
| P63027 | Vesicle-associated membrane protein 2<br>OS=Homo sapiens<br>GN=VAMP2<br>PE=1 SV=3 - [VAMP2_HUMAN]               | 43.10 | 2 | 2  | 6  | 74  | 1.109 | 0.936 | 0.951 | 0.909 | 203.99 | 43.10 | 11 | 74  | 116  | 12.7  | 8.13  |
| P62241 | 40S ribosomal protein S8<br>OS=Homo sapiens<br>GN=RPS8<br>PE=1 SV=2 - [RS8_HUMAN]                               | 39.42 | 1 | 11 | 11 | 122 | 0.809 | 0.987 | 0.971 | 0.909 | 281.84 | 39.42 | 18 | 122 | 208  | 24.2  | 10.32 |
| Q16531 | DNA damage-binding protein 1<br>OS=Homo sapiens<br>GN=DDB1<br>PE=1 SV=1 - [DDB1_HUMAN]                          | 31.32 | 1 | 30 | 30 | 88  | 0.891 | 0.920 | 0.911 | 0.909 | 203.53 | 31.32 | 47 | 88  | 1140 | 126.9 | 5.26  |
| Q9BXT8 | RING finger protein 17<br>OS=Homo sapiens<br>GN=RNF17<br>PE=1 SV=3 - [RNF17_HUMAN]                              | 1.97  | 1 | 2  | 3  | 5   | 0.934 | 1.025 | 1.409 | 0.909 | 6.93   | 1.97  | 3  | 5   | 1623 | 184.5 | 5.40  |
| Q9UI14 | Prenylated Rab acceptor protein 1<br>OS=Homo sapiens<br>GN=RABAC1<br>PE=1 SV=1 - [PRAF1_HUMAN]                  | 14.59 | 1 | 3  | 3  | 17  | 0.535 | 0.643 | 0.745 | 0.909 | 64.04  | 14.59 | 3  | 17  | 185  | 20.6  | 7.34  |

|        |                                                                                                                                                  |       |   |    |    |    |       |       |       |       |       |       |    |    |      |       |       |
|--------|--------------------------------------------------------------------------------------------------------------------------------------------------|-------|---|----|----|----|-------|-------|-------|-------|-------|-------|----|----|------|-------|-------|
| Q9UK99 | F-box only protein 3<br>OS=Homo sapiens<br>GN=FBXO3<br>PE=1 SV=3 - [FBX3_HUMAN]                                                                  | 4.03  | 1 | 1  | 2  | 5  | 1.011 | 1.269 | 1.318 | 0.909 | 10.42 | 4.03  | 3  | 5  | 471  | 54.5  | 5.00  |
| Q8TBE9 | N-acetylneuraminat e-9-phosphatase<br>OS=Homo sapiens<br>GN=NANP<br>PE=1 SV=1 - [NANP_HUMAN]<br>Spermatogene sis-assodated serine-rich protein 2 | 7.26  | 1 | 1  | 1  | 1  | 1.185 | 0.798 | 1.022 | 0.909 | 2.14  | 7.26  | 1  | 1  | 248  | 27.8  | 6.40  |
| Q86XZ4 | OS=Homo sapiens<br>GN=SPATS2<br>PE=1 SV=1 - [SPAS2_HUMAN ]                                                                                       | 10.64 | 1 | 5  | 5  | 17 | 0.696 | 1.011 | 1.215 | 0.909 | 32.71 | 10.64 | 7  | 17 | 545  | 59.5  | 8.90  |
| Q96JH7 | Deubiquitatin g protein VCIIP135<br>OS=Homo sapiens<br>GN=VCIIP1<br>PE=1 SV=2 - [VCIIP1_HUMAN ]                                                  | 18.17 | 1 | 15 | 17 | 38 | 0.893 | 1.174 | 1.079 | 0.909 | 62.10 | 18.17 | 23 | 38 | 1222 | 134.2 | 7.20  |
| Q9H8X2 | Inositol-pentakisphosph ate 2-kinase<br>OS=Homo sapiens<br>GN=IPPK PE=1 SV=1 - [IPPK_HUMAN]                                                      | 2.24  | 1 | 1  | 1  | 1  | 0.803 | 0.661 | 0.811 | 0.909 | 2.18  | 2.24  | 1  | 1  | 491  | 56.0  | 8.37  |
| Q14571 | Inositol 1,4,5-trisphosphate receptor type 2<br>OS=Homo sapiens<br>GN=ITPR2<br>PE=1 SV=2 - [ITPR2_HUMAN ]                                        | 2.96  | 1 | 2  | 10 | 24 | 1.047 | 1.481 | 1.430 | 0.909 | 42.86 | 2.96  | 15 | 24 | 2701 | 307.9 | 6.43  |
| Q96J94 | Piwi-like protein 1<br>OS=Homo sapiens<br>GN=PIWLL1<br>PE=1 SV=1 - [PIWLL1_HUMAN]                                                                | 0.70  | 1 | 1  | 1  | 1  | 0.954 | 1.723 | 1.077 | 0.909 | 2.08  | 0.70  | 1  | 1  | 861  | 98.5  | 9.44  |
| O60231 | Putative pre-mRNA-splicing factor ATP-dependent RNA helicase<br>DHX16<br>OS=Homo sapiens<br>GN=DHX16<br>PE=1 SV=2 - [DHX16_HUMAN]                | 9.03  | 3 | 8  | 9  | 27 | 0.991 | 1.170 | 0.854 | 0.910 | 64.60 | 9.03  | 13 | 27 | 1041 | 119.2 | 6.80  |
| Q9BQ48 | 39S ribosomal protein L34, mitochondrial<br>OS=Homo sapiens<br>GN=MRPL34<br>PE=1 SV=1 - [RM34_HUMAN]                                             | 11.96 | 1 | 2  | 2  | 6  | 1.081 | 0.949 | 1.132 | 0.910 | 10.94 | 11.96 | 4  | 6  | 92   | 10.2  | 12.25 |

|        |                                                                                                                                         |       |   |    |    |    |       |       |       |       |        |       |    |    |     |      |       |
|--------|-----------------------------------------------------------------------------------------------------------------------------------------|-------|---|----|----|----|-------|-------|-------|-------|--------|-------|----|----|-----|------|-------|
| Q8TAE8 | Growth arrest and DNA damage-inducible proteins-interacting protein 1<br>OS=Homo sapiens<br>GN=GADD45GIP<br>1 PE=1 SV=1 - [G45IP_HUMAN] | 14.86 | 1 | 3  | 3  | 4  | 0.759 | 0.966 | 0.951 | 0.910 | 11.66  | 14.86 | 4  | 4  | 222 | 25.4 | 10.02 |
| Q4J6C6 | Prolyl endopeptidase-like<br>OS=Homo sapiens<br>GN=PREPL<br>PE=1 SV=1 - [PPCEL_HUMAN]                                                   | 12.24 | 1 | 7  | 7  | 20 | 0.704 | 0.854 | 1.555 | 0.910 | 49.48  | 12.24 | 10 | 20 | 727 | 83.9 | 6.38  |
| Q86SR1 | Polypeptide N-acetylgalactosaminyltransferase 10<br>OS=Homo sapiens<br>GN=GALNT10<br>PE=1 SV=2 - [GLT10_HUMAN]                          | 12.60 | 1 | 5  | 5  | 9  | 0.649 | 0.847 | 1.097 | 0.910 | 21.99  | 12.60 | 6  | 9  | 603 | 68.9 | 8.59  |
| P48637 | Glutathione synthetase<br>OS=Homo sapiens<br>GN=GSS PE=1 SV=1 - [GSHB_HUMAN]                                                            | 37.13 | 1 | 17 | 17 | 69 | 1.065 | 0.813 | 0.979 | 0.910 | 161.74 | 37.13 | 28 | 69 | 474 | 52.4 | 5.92  |
| P52943 | Cysteine-rich protein 2<br>OS=Homo sapiens<br>GN=CRIP2<br>PE=1 SV=1 - [CRIP2_HUMAN]                                                     | 44.71 | 2 | 7  | 8  | 30 | 2.315 | 4.826 | 3.695 | 0.910 | 79.48  | 44.71 | 11 | 30 | 208 | 22.5 | 8.72  |
| Q5SWX8 | Protein odr-4 homolog<br>OS=Homo sapiens<br>GN=ODR4<br>PE=2 SV=1 - [ODR4_HUMAN]                                                         | 18.72 | 1 | 7  | 8  | 20 | 0.935 | 0.727 | 0.652 | 0.910 | 37.46  | 18.72 | 13 | 20 | 454 | 51.1 | 5.92  |
| Q05066 | Sex-determining region Y protein<br>OS=Homo sapiens<br>GN=SRY PE=1 SV=1 - [SRY_HUMAN]                                                   | 3.43  | 1 | 1  | 1  | 2  | 1.424 | 0.522 | 0.999 | 0.910 | 2.31   | 3.43  | 2  | 2  | 204 | 23.9 | 9.48  |
| Q14657 | EKC/KEOPS complex subunit LAGE3<br>OS=Homo sapiens<br>GN=LAGE3<br>PE=1 SV=2 - [LAGE3_HUMAN]                                             | 16.08 | 1 | 1  | 1  | 5  | 1.229 | 0.999 | 0.838 | 0.910 | 23.87  | 16.08 | 2  | 5  | 143 | 14.8 | 8.63  |

|        |                                                                                                              |       |   |    |    |     |       |       |       |       |        |       |    |     |     |      |       |
|--------|--------------------------------------------------------------------------------------------------------------|-------|---|----|----|-----|-------|-------|-------|-------|--------|-------|----|-----|-----|------|-------|
| Q9BR77 | Coiled-coil domain-containing protein 77<br>OS=Homo sapiens<br>GN=CCDC77<br>PE=2 SV=1 - [CCD77_HUMAN]        | 3.07  | 1 | 1  | 2  | 5   | 0.685 | 0.732 | 0.742 | 0.911 | 12.66  | 3.07  | 2  | 5   | 488 | 57.5 | 8.72  |
| P61916 | Epididymal secretory protein E1<br>OS=Homo sapiens<br>GN=NPC2<br>PE=1 SV=1 - [NPC2_HUMAN]                    | 33.11 | 1 | 8  | 8  | 25  | 0.549 | 1.139 | 0.933 | 0.911 | 42.80  | 33.11 | 13 | 25  | 151 | 16.6 | 7.65  |
| Q9Y3I0 | tRNA-splicing ligase RtcB homolog<br>OS=Homo sapiens<br>GN=RTCB<br>PE=1 SV=1 - [RTCB_HUMAN]                  | 51.49 | 1 | 24 | 24 | 154 | 0.868 | 1.007 | 1.018 | 0.911 | 404.37 | 51.49 | 41 | 154 | 505 | 55.2 | 7.23  |
| P62995 | Transformer-2 protein homolog beta<br>OS=Homo sapiens<br>GN=TRA2B<br>PE=1 SV=1 - [TRA2B_HUMAN]               | 11.46 | 1 | 2  | 4  | 12  | 1.038 | 1.015 | 0.764 | 0.911 | 34.16  | 11.46 | 6  | 12  | 288 | 33.6 | 11.25 |
| Q4G0F5 | Vacuolar protein sorting-associated protein 26B<br>OS=Homo sapiens<br>GN=VPS26B<br>PE=1 SV=2 - [VP26B_HUMAN] | 27.98 | 1 | 7  | 8  | 25  | 0.954 | 0.660 | 0.653 | 0.911 | 59.53  | 27.98 | 12 | 25  | 336 | 39.1 | 7.36  |
| P48444 | Coatomer subunit delta<br>OS=Homo sapiens<br>GN=ARCN1<br>PE=1 SV=1 - [COPD_HUMAN]                            | 40.70 | 1 | 25 | 25 | 138 | 0.955 | 0.802 | 0.816 | 0.911 | 309.53 | 40.70 | 44 | 138 | 511 | 57.2 | 6.21  |
| Q9H832 | Ubiquitin-conjugating enzyme E2 Z<br>OS=Homo sapiens<br>GN=UBE2Z<br>PE=1 SV=2 - [UBE2Z_HUMAN]                | 24.86 | 1 | 8  | 8  | 31  | 0.886 | 0.925 | 1.137 | 0.911 | 68.19  | 24.86 | 14 | 31  | 354 | 38.2 | 5.62  |
| Q9UH92 | Max-like protein X<br>OS=Homo sapiens<br>GN=MLX PE=1 SV=2 - [MLX_HUMAN]                                      | 2.01  | 1 | 1  | 1  | 1   | 0.704 | 1.216 | 1.205 | 0.911 | 0.00   | 2.01  | 1  | 1   | 298 | 33.3 | 8.06  |
| Q3KQZ1 | Solute carrier family 25 member 35<br>OS=Homo sapiens<br>GN=SLC25A35<br>PE=2 SV=1 - [S2535_HUMAN]            | 3.67  | 1 | 1  | 1  | 3   | 0.680 | 0.320 | 0.280 | 0.911 | 2.77   | 3.67  | 1  | 3   | 300 | 32.4 | 9.11  |

|        |                                                                                                                           |       |   |    |    |     |       |       |       |       |         |       |    |     |      |       |      |
|--------|---------------------------------------------------------------------------------------------------------------------------|-------|---|----|----|-----|-------|-------|-------|-------|---------|-------|----|-----|------|-------|------|
| Q13219 | Pappalysin-1<br>OS=Homo sapiens<br>GN=PAPPA<br>PE=1 SV=3 - [PAPP1_HUMAN]                                                  | 0.43  | 1 | 1  | 1  | 1   | 1.428 | 0.841 | 0.789 | 0.911 | 2.02    | 0.43  | 1  | 1   | 1627 | 180.9 | 6.18 |
| Q96K17 | Transcription factor BTF3 homolog 4<br>OS=Homo sapiens<br>GN=BTF3L4<br>PE=1 SV=1 - [BT3L4_HUMAN]                          | 20.25 | 1 | 5  | 5  | 13  | 0.791 | 0.954 | 0.879 | 0.911 | 30.57   | 20.25 | 7  | 13  | 158  | 17.3  | 6.35 |
| P78417 | Glutathione S-transferase omega-1<br>OS=Homo sapiens<br>GN=GSTO1<br>PE=1 SV=2 - [GSTO1_HUMAN]                             | 44.81 | 1 | 17 | 17 | 176 | 0.882 | 1.015 | 1.072 | 0.911 | 384.38  | 44.81 | 28 | 176 | 241  | 27.5  | 6.60 |
| Q9H008 | Phospholysine phosphohistidine inorganic pyrophosphate phosphatase<br>OS=Homo sapiens<br>GN=LHPP PE=1 SV=2 - [LHPP_HUMAN] | 31.11 | 1 | 5  | 5  | 19  | 1.140 | 1.312 | 1.073 | 0.911 | 59.66   | 31.11 | 8  | 19  | 270  | 29.1  | 6.15 |
| O95487 | Protein transport protein Sec24B<br>OS=Homo sapiens<br>GN=SEC24B<br>PE=1 SV=2 - [SC24B_HUMAN]                             | 11.04 | 1 | 11 | 12 | 37  | 1.053 | 0.884 | 0.838 | 0.911 | 111.91  | 11.04 | 20 | 37  | 1268 | 137.3 | 6.67 |
| O95486 | Protein transport protein Sec24A<br>OS=Homo sapiens<br>GN=SEC24A<br>PE=1 SV=2 - [SC24A_HUMAN]                             | 15.55 | 1 | 13 | 14 | 49  | 0.891 | 0.760 | 0.827 | 0.912 | 116.49  | 15.55 | 23 | 49  | 1093 | 119.7 | 7.66 |
| Q9UBP0 | Spastin<br>OS=Homo sapiens<br>GN=SPAST<br>PE=1 SV=1 - [SPAST_HUMAN]                                                       | 6.33  | 1 | 4  | 5  | 6   | 1.054 | 1.054 | 1.104 | 0.912 | 11.42   | 6.33  | 6  | 6   | 616  | 67.2  | 9.64 |
| P63104 | 14-3-3 protein zeta/delta<br>OS=Homo sapiens<br>GN=YWHAZ<br>PE=1 SV=1 - [1433Z_HUMAN]                                     | 74.29 | 1 | 19 | 24 | 374 | 1.115 | 1.139 | 1.162 | 0.912 | 1148.53 | 74.29 | 38 | 374 | 245  | 27.7  | 4.79 |
| Q9UH65 | Switch-associated protein 70<br>OS=Homo sapiens<br>GN=SWAP70<br>PE=1 SV=1 - [SWP70_HUMAN]                                 | 46.67 | 1 | 25 | 25 | 112 | 1.061 | 0.736 | 0.840 | 0.912 | 303.76  | 46.67 | 38 | 112 | 585  | 69.0  | 5.87 |

|        |                                                                                                                                                                                                                                                                         |       |   |    |    |     |       |       |       |       |        |       |    |     |      |       |       |
|--------|-------------------------------------------------------------------------------------------------------------------------------------------------------------------------------------------------------------------------------------------------------------------------|-------|---|----|----|-----|-------|-------|-------|-------|--------|-------|----|-----|------|-------|-------|
| P26640 | Valine--tRNA<br>ligase<br>OS=Homo<br>sapiens<br>GN=VARS<br>PE=1 SV=4 -<br>[SYVC_HUMAN]                                                                                                                                                                                  | 33.31 | 1 | 37 | 37 | 205 | 0.874 | 0.823 | 0.994 | 0.912 | 555.11 | 33.31 | 65 | 205 | 1264 | 140.4 | 7.59  |
| Q9BVK6 | Transmembran<br>e emp24<br>domain-<br>containing<br>protein 9<br>OS=Homo<br>sapiens<br>GN=TMED9<br>PE=1 SV=2 -<br>[TMED9_HUMA<br>Transcription<br>elongation<br>factor A<br>protein-like 3<br>OS=Homo<br>sapiens<br>GN=TCEAL3<br>PE=1 SV=1 -<br>[TCAL3_HUMAN<br>]       | 33.62 | 1 | 11 | 12 | 45  | 0.830 | 0.894 | 0.795 | 0.912 | 108.49 | 33.62 | 17 | 45  | 235  | 27.3  | 8.02  |
| Q969E4 | Abl interactor<br>1 OS=Homo<br>sapiens<br>GN=ABI1 PE=1<br>SV=4 -<br>[ABI1_HUMAN]                                                                                                                                                                                        | 16.50 | 3 | 4  | 4  | 9   | 0.773 | 1.361 | 1.113 | 0.912 | 17.16  | 16.50 | 7  | 9   | 200  | 22.5  | 4.92  |
| Q8IZP0 | HemK<br>methyltransfer<br>ase family<br>member 2<br>OS=Homo<br>sapiens<br>GN=N6AMT1<br>PE=1 SV=3 -<br>[HEMK2_HUMA<br>Putative tRNA<br>(cytidine(32)/g<br>uanosine(34)-<br>2'-O)-<br>methyltransfer<br>ase OS=Homo<br>sapiens<br>GN=FTSJ1<br>PE=1 SV=2 -<br>[TRM7_HUMAN] | 24.02 | 1 | 7  | 10 | 42  | 1.124 | 1.275 | 1.464 | 0.912 | 90.02  | 24.02 | 18 | 42  | 508  | 55.0  | 7.06  |
| Q9Y5N5 | DCN1-like<br>protein 1<br>OS=Homo<br>sapiens<br>GN=DCUNID1<br>PE=1 SV=1 -<br>[DCNL1_HUMAN<br>]                                                                                                                                                                          | 14.49 | 1 | 3  | 3  | 17  | 0.794 | 0.763 | 0.961 | 0.912 | 38.42  | 14.49 | 5  | 17  | 214  | 22.9  | 5.21  |
| Q9UET6 | Protein PTHB1<br>OS=Homo<br>sapiens<br>GN=BBS9<br>PE=1 SV=1 -<br>[PTHB1_HUMAN<br>]                                                                                                                                                                                      | 6.08  | 1 | 2  | 2  | 3   | 0.659 | 1.086 | 1.350 | 0.912 | 10.52  | 6.08  | 2  | 3   | 329  | 36.1  | 5.69  |
| Q96GG9 | Artemin<br>OS=Homo<br>sapiens<br>GN=ARTN<br>PE=1 SV=1 -<br>[ARTN_HUMAN]                                                                                                                                                                                                 | 27.41 | 2 | 7  | 7  | 28  | 1.021 | 1.028 | 1.104 | 0.912 | 40.35  | 27.41 | 10 | 28  | 259  | 30.1  | 5.34  |
| Q3SYG4 |                                                                                                                                                                                                                                                                         | 3.72  | 1 | 2  | 3  | 7   | 0.998 |       | 0.847 | 0.912 | 21.58  | 3.72  | 3  | 7   | 887  | 99.2  | 5.55  |
| Q5T4W7 |                                                                                                                                                                                                                                                                         | 6.36  | 1 | 1  | 1  | 1   | 0.619 | 0.732 | 0.863 | 0.912 | 1.61   | 6.36  | 1  | 1   | 220  | 22.9  | 11.71 |

|        |                                                                                                                             |       |   |    |    |     |       |       |       |       |        |       |    |     |      |       |      |
|--------|-----------------------------------------------------------------------------------------------------------------------------|-------|---|----|----|-----|-------|-------|-------|-------|--------|-------|----|-----|------|-------|------|
| Q14790 | Caspase-8<br>OS=Homo<br>sapiens<br>GN=CASP8<br>PE=1 SV=1 -<br>[CASP8_HUMAN<br>]                                             | 5.64  | 1 | 1  | 3  | 4   | 0.598 | 1.372 | 1.169 | 0.912 | 4.11   | 5.64  | 3  | 4   | 479  | 55.4  | 5.10 |
| Q9UP83 | Conserved<br>oligomeric Golgi<br>complex<br>subunit 5<br>OS=Homo<br>sapiens<br>GN=COG5<br>PE=1 SV=3 -<br>[COG5_HUMAN]       | 8.82  | 1 | 7  | 7  | 15  | 0.769 | 1.056 | 1.068 | 0.912 | 24.22  | 8.82  | 11 | 15  | 839  | 92.7  | 6.60 |
| Q99832 | T-complex<br>protein 1<br>subunit eta<br>OS=Homo<br>sapiens<br>GN=CCT7<br>PE=1 SV=2 -<br>[TCPH_HUMAN]                       | 60.96 | 1 | 33 | 33 | 185 | 0.888 | 0.955 | 0.963 | 0.912 | 492.05 | 60.96 | 52 | 185 | 543  | 59.3  | 7.65 |
| P49916 | DNA ligase 3<br>OS=Homo<br>sapiens<br>GN=LIG3 PE=1<br>SV=2 -<br>[DNL3_HUMAN]                                                | 12.09 | 1 | 11 | 11 | 34  | 0.919 | 1.340 | 1.229 | 0.912 | 61.42  | 12.09 | 19 | 34  | 1009 | 112.8 | 9.01 |
| P84090 | Enhancer of<br>rudimentary<br>homolog<br>OS=Homo<br>sapiens<br>GN=ERH PE=1<br>SV=1 -<br>[ERH_HUMAN]                         | 22.12 | 1 | 4  | 4  | 34  | 0.985 | 1.016 | 0.743 | 0.912 | 80.11  | 22.12 | 7  | 34  | 104  | 12.3  | 5.92 |
| P32754 | 4-<br>hydroxyphenylp<br>yruvate<br>dioxygenase<br>OS=Homo<br>sapiens<br>GN=HPD PE=1<br>SV=2 -<br>[HPPD_HUMAN]               | 3.82  | 1 | 1  | 1  | 1   | 1.918 | 0.486 | 0.737 | 0.912 | 2.39   | 3.82  | 1  | 1   | 393  | 44.9  | 7.01 |
| A6ND36 | Protein<br>FAM83G<br>OS=Homo<br>sapiens<br>GN=FAM83G<br>PE=1 SV=2 -<br>[FAM83G_HUMAN<br>]                                   | 2.19  | 1 | 1  | 2  | 6   | 0.692 | 0.899 | 1.510 | 0.913 | 10.98  | 2.19  | 3  | 6   | 823  | 90.8  | 6.39 |
| P53365 | Arfaptin-2<br>OS=Homo<br>sapiens<br>GN=ARFIP2<br>PE=1 SV=1 -<br>[ARFP2_HUMAN<br>]                                           | 15.84 | 1 | 4  | 5  | 13  | 1.118 | 0.941 | 1.136 | 0.913 | 36.93  | 15.84 | 8  | 13  | 341  | 37.8  | 6.04 |
| Q96BJ3 | Axin interactor,<br>dorsalization-<br>associated<br>protein<br>OS=Homo<br>sapiens<br>GN=AIDA PE=1<br>SV=1 -<br>[AIDA_HUMAN] | 34.97 | 1 | 9  | 9  | 33  | 1.267 | 1.120 | 1.029 | 0.913 | 85.78  | 34.97 | 16 | 33  | 306  | 35.0  | 6.55 |



|        |                                                                                                               |       |   |    |    |    |       |       |       |       |        |       |    |    |      |       |      |
|--------|---------------------------------------------------------------------------------------------------------------|-------|---|----|----|----|-------|-------|-------|-------|--------|-------|----|----|------|-------|------|
| Q92597 | Protein NDRG1<br>OS=Homo sapiens<br>GN=NDRG1<br>PE=1 SV=1 - [NDRG1_HUMAN]                                     | 32.74 | 1 | 8  | 8  | 77 | 2.858 | 0.781 | 0.789 | 0.913 | 206.82 | 32.74 | 14 | 77 | 394  | 42.8  | 5.82 |
| Q13454 | Tumor suppressor candidate 3<br>OS=Homo sapiens<br>GN=TUSC3<br>PE=1 SV=1 - [TUSC3_HUMAN]                      | 10.34 | 1 | 3  | 4  | 7  | 0.583 | 1.110 | 0.918 | 0.913 | 15.00  | 10.34 | 7  | 7  | 348  | 39.7  | 9.91 |
| P51812 | Ribosomal protein S6 kinase alpha-3<br>OS=Homo sapiens<br>GN=RPS6KA3<br>PE=1 SV=1 - [KS6A3_HUMAN]             | 27.84 | 4 | 18 | 18 | 57 | 1.010 | 0.924 | 0.902 | 0.913 | 126.02 | 27.84 | 31 | 57 | 740  | 83.7  | 6.89 |
| Q9NX36 | DnaJ homolog subfamily C member 28<br>OS=Homo sapiens<br>GN=DNAJC28<br>PE=1 SV=2 - [DJC28_HUMAN]              | 1.80  | 1 | 1  | 1  | 10 | 0.827 | 1.100 | 0.948 | 0.913 | 23.72  | 1.80  | 1  | 10 | 388  | 45.8  | 9.55 |
| Q8WXF7 | Atlastin-1<br>OS=Homo sapiens<br>GN=ATL1 PE=1 SV=1 - [ATLA1_HUMAN]                                            | 24.55 | 1 | 11 | 12 | 33 | 1.126 | 1.029 | 1.194 | 0.913 | 57.91  | 24.55 | 19 | 33 | 558  | 63.5  | 6.18 |
| O43572 | A-kinase anchor protein 10, mitochondrial<br>OS=Homo sapiens<br>GN=AKAP10<br>PE=1 SV=2 - [AKA10_HUMAN]        | 7.85  | 1 | 3  | 3  | 4  | 1.148 | 1.076 | 0.823 | 0.913 | 11.27  | 7.85  | 3  | 4  | 662  | 73.8  | 6.39 |
| O94885 | SAM and SH3 domain-containing protein 1<br>OS=Homo sapiens<br>GN=SASH1<br>PE=1 SV=3 - [SASH1_HUMAN]           | 7.86  | 2 | 8  | 8  | 13 | 0.669 | 0.864 | 1.006 | 0.913 | 32.48  | 7.86  | 10 | 13 | 1247 | 136.6 | 6.09 |
| Q9BTD8 | RNA-binding protein 42<br>OS=Homo sapiens<br>GN=RBM42<br>PE=1 SV=1 - [RBM42_HUMAN]                            | 9.17  | 1 | 4  | 4  | 8  | 1.079 | 0.933 | 0.852 | 0.914 | 12.96  | 9.17  | 6  | 8  | 480  | 50.4  | 9.63 |
| Q15257 | Serine/threonine-protein phosphatase 2A activator<br>OS=Homo sapiens<br>GN=PPP2R4<br>PE=1 SV=3 - [PTPA_HUMAN] | 25.14 | 1 | 8  | 8  | 56 | 0.955 | 0.987 | 0.966 | 0.914 | 114.40 | 25.14 | 12 | 56 | 358  | 40.6  | 5.94 |

|        |                                                                                                                                   |       |   |   |   |    |       |       |       |       |       |       |   |    |     |       |      |
|--------|-----------------------------------------------------------------------------------------------------------------------------------|-------|---|---|---|----|-------|-------|-------|-------|-------|-------|---|----|-----|-------|------|
| Q9Y2L9 | Leucine-rich repeat and calponin homology domain-containing protein 1<br>OS=Homo sapiens<br>GN=LRCH1<br>PE=1 SV=3 - [LRCH1_HUMAN] | 4.53  | 1 | 2 | 3 | 7  | 1.271 | 0.786 | 0.757 | 0.914 | 15.81 | 4.53  | 5 | 7  | 728 | 80.8  | 5.94 |
| Q81VF6 | Ankyrin repeat domain-containing protein 18A<br>OS=Homo sapiens<br>GN=ANKRD18A<br>PE=2 SV=3 - [AN18A_HUMAN]                       | 3.33  | 2 | 3 | 4 | 7  | 0.777 | 0.678 | 0.626 | 0.914 | 7.34  | 3.33  | 5 | 7  | 992 | 115.5 | 7.83 |
| O14978 | Zinc finger protein 263<br>OS=Homo sapiens<br>GN=ZNF263<br>PE=2 SV=2 - [ZNF263_HUMAN]                                             | 2.05  | 1 | 1 | 1 | 1  | 1.147 | 1.306 | 1.059 | 0.914 | 3.12  | 2.05  | 1 | 1  | 683 | 77.2  | 6.99 |
| Q5BJF6 | Outer dense fiber protein 2<br>OS=Homo sapiens<br>GN=ODF2<br>PE=1 SV=1 - [ODFP2_HUMAN]                                            | 2.90  | 1 | 2 | 3 | 3  | 2.268 | 1.224 | 1.496 | 0.914 | 4.03  | 2.90  | 3 | 3  | 829 | 95.3  | 7.62 |
| Q14156 | Protein EFR3 homolog A<br>OS=Homo sapiens<br>GN=EFR3A<br>PE=1 SV=2 - [EFR3A_HUMAN]                                                | 6.58  | 1 | 4 | 4 | 11 | 0.988 | 1.023 | 0.897 | 0.914 | 22.96 | 6.58  | 5 | 11 | 821 | 92.9  | 6.70 |
| Q86VR2 | Protein FAM134C<br>OS=Homo sapiens<br>GN=FAM134C<br>PE=1 SV=1 - [F134C_HUMAN]                                                     | 11.59 | 1 | 4 | 4 | 15 | 0.638 | 1.040 | 1.068 | 0.914 | 42.40 | 11.59 | 7 | 15 | 466 | 51.4  | 4.97 |
| Q9GZP4 | PITH domain-containing protein 1<br>OS=Homo sapiens<br>GN=PITHD1<br>PE=1 SV=1 - [PITH1_HUMAN]                                     | 13.27 | 1 | 3 | 3 | 8  | 0.816 | 0.779 | 1.031 | 0.914 | 17.70 | 13.27 | 5 | 8  | 211 | 24.2  | 5.74 |
| Q81V38 | Ankyrin repeat and MYND domain-containing protein 2<br>OS=Homo sapiens<br>GN=ANKMY2<br>PE=1 SV=1 - [ANKY2_HUMAN]                  | 1.59  | 1 | 1 | 1 | 4  | 0.893 | 1.569 | 0.990 | 0.914 | 9.06  | 1.59  | 2 | 4  | 441 | 49.3  | 6.25 |

|        |                                                                                                           |       |   |    |    |     |       |       |       |       |        |       |    |     |      |       |      |
|--------|-----------------------------------------------------------------------------------------------------------|-------|---|----|----|-----|-------|-------|-------|-------|--------|-------|----|-----|------|-------|------|
| P28749 | Retinoblastoma-like protein 1<br>OS=Homo sapiens<br>GN=RBL1 PE=1 SV=3 - [RBL1_HUMAN]                      | 3.00  | 1 | 3  | 3  | 9   | 0.737 | 1.047 | 0.722 | 0.914 | 19.13  | 3.00  | 3  | 9   | 1068 | 120.8 | 7.50 |
| O00231 | 26S proteasome non-ATPase regulatory subunit 11<br>OS=Homo sapiens<br>GN=PSMD11 PE=1 SV=3 - [PSD11_HUMAN] | 66.59 | 1 | 25 | 25 | 116 | 0.931 | 0.918 | 0.960 | 0.914 | 273.24 | 66.59 | 42 | 116 | 422  | 47.4  | 6.48 |
| Q3YEC7 | Rab-like protein 6<br>OS=Homo sapiens<br>GN=RABL6 PE=1 SV=2 - [RABL6_HUMAN]                               | 8.23  | 1 | 6  | 6  | 14  | 0.746 | 0.779 | 0.759 | 0.914 | 27.07  | 8.23  | 10 | 14  | 729  | 79.5  | 5.22 |
| O75063 | Glycosaminoglycan xylosylkinase<br>OS=Homo sapiens<br>GN=FAM20B PE=1 SV=1 - [XYLK_HUMAN]                  | 8.07  | 1 | 2  | 2  | 5   | 0.701 | 1.029 | 1.167 | 0.914 | 10.49  | 8.07  | 4  | 5   | 409  | 46.4  | 6.87 |
| Q13158 | FAS-associated death domain protein<br>OS=Homo sapiens<br>GN=FADD PE=1 SV=1 - [FADD_HUMAN]                | 28.85 | 1 | 6  | 6  | 35  | 0.816 | 0.836 | 1.117 | 0.915 | 92.95  | 28.85 | 12 | 35  | 208  | 23.3  | 5.69 |
| Q8WZ49 | Immunity-related GTPase family Q protein<br>OS=Homo sapiens<br>GN=IRGQ PE=1 SV=1 - [IRGQ_HUMAN]           | 19.10 | 1 | 11 | 11 | 25  | 1.190 | 0.854 | 1.171 | 0.915 | 55.74  | 19.10 | 16 | 25  | 623  | 62.7  | 4.88 |
| Q06323 | Proteasome activator complex subunit 1<br>OS=Homo sapiens<br>GN=PSME1 PE=1 SV=1 - [PSME1_HUMAN]           | 53.01 | 1 | 16 | 16 | 196 | 1.474 | 0.939 | 0.893 | 0.915 | 419.45 | 53.01 | 24 | 196 | 249  | 28.7  | 6.02 |
| O00244 | Copper transport protein ATOX1<br>OS=Homo sapiens<br>GN=ATOX1 PE=1 SV=1 - [ATOX1_HUMAN]                   | 38.24 | 1 | 3  | 3  | 19  | 0.818 | 0.830 | 0.777 | 0.915 | 32.73  | 38.24 | 6  | 19  | 68   | 7.4   | 7.24 |
| Q9H246 | Uncharacterized protein C1orf21<br>OS=Homo sapiens<br>GN=C1orf21 PE=1 SV=1 - [CA021_HUMAN]                | 8.26  | 1 | 1  | 1  | 4   | 1.103 | 1.331 | 1.214 | 0.915 | 13.26  | 8.26  | 2  | 4   | 121  | 13.9  | 5.22 |

|        |                                                                                                                              |       |   |    |    |     |       |       |       |       |        |       |    |     |      |       |      |
|--------|------------------------------------------------------------------------------------------------------------------------------|-------|---|----|----|-----|-------|-------|-------|-------|--------|-------|----|-----|------|-------|------|
| Q92973 | Transportin-1<br>OS=Homo sapiens<br>GN=TNPO1<br>PE=1 SV=2 - [TNPO1_HUMAN]                                                    | 18.49 | 1 | 10 | 14 | 72  | 0.922 | 0.773 | 0.962 | 0.915 | 187.41 | 18.49 | 22 | 72  | 898  | 102.3 | 4.98 |
| Q9UBQ0 | Vacuolar protein sorting-associated protein 29<br>OS=Homo sapiens<br>GN=VPS29<br>PE=1 SV=1 - [VPS29_HUMAN]                   | 24.18 | 1 | 5  | 5  | 22  | 1.067 | 0.981 | 0.894 | 0.915 | 65.01  | 24.18 | 7  | 22  | 182  | 20.5  | 6.79 |
| Q9NQ66 | 1-phosphatidylinositol 4,5-bisphosphate phosphodiesterase beta-1<br>OS=Homo sapiens<br>GN=PLCB1<br>PE=1 SV=1 - [PLCB1_HUMAN] | 8.80  | 2 | 10 | 11 | 33  | 1.118 | 1.486 | 1.303 | 0.915 | 49.52  | 8.80  | 17 | 33  | 1216 | 138.5 | 6.23 |
| P37840 | Alpha-synuclein<br>OS=Homo sapiens<br>GN=SNCA<br>PE=1 SV=1 - [SYUA_HUMAN]                                                    | 22.14 | 1 | 2  | 3  | 10  | 0.864 | 0.566 | 0.900 | 0.915 | 20.03  | 22.14 | 5  | 10  | 140  | 14.5  | 4.70 |
| Q9BV40 | Vesicle-associated membrane protein 8<br>OS=Homo sapiens<br>GN=VAMP8<br>PE=1 SV=1 - [VAMP8_HUMAN]                            | 9.00  | 1 | 1  | 1  | 3   | 0.394 | 1.060 | 0.316 | 0.915 | 7.89   | 9.00  | 2  | 3   | 100  | 11.4  | 7.34 |
| Q9H2D6 | TRIO and F-actin-binding protein<br>OS=Homo sapiens<br>GN=TRIOBP<br>PE=1 SV=3 - [TARA_HUMAN]                                 | 16.28 | 1 | 37 | 41 | 193 | 0.910 | 1.104 | 1.311 | 0.915 | 443.88 | 16.28 | 72 | 193 | 2365 | 261.2 | 8.48 |
| Q9H8M2 | Bromodomain-containing protein 9<br>OS=Homo sapiens<br>GN=BRD9<br>PE=1 SV=2 - [BRD9_HUMAN]                                   | 9.55  | 1 | 4  | 4  | 6   | 1.163 | 1.358 | 2.468 | 0.915 | 5.81   | 9.55  | 4  | 6   | 597  | 67.0  | 6.19 |
| Q14141 | Septin-6<br>OS=Homo sapiens<br>GN=SEPT6<br>PE=1 SV=4 - [SEPT6_HUMAN]                                                         | 30.88 | 1 | 2  | 14 | 66  | 1.325 | 2.204 | 2.689 | 0.915 | 140.12 | 30.88 | 21 | 66  | 434  | 49.7  | 6.67 |

|        |                                                                                                                         |       |   |    |    |     |       |       |       |       |        |       |    |     |      |       |      |
|--------|-------------------------------------------------------------------------------------------------------------------------|-------|---|----|----|-----|-------|-------|-------|-------|--------|-------|----|-----|------|-------|------|
| Q8N2S1 | Latent-transforming growth factor beta-binding protein 4<br>OS=Homo sapiens<br>GN=LTBP4<br>PE=1 SV=2 - [LTBP4_HUMAN]    | 1.35  | 1 | 2  | 2  | 4   | 1.902 | 1.856 | 1.234 | 0.915 | 12.64  | 1.35  | 2  | 4   | 1624 | 173.3 | 5.43 |
| Q14457 | Bedin-1<br>OS=Homo sapiens<br>GN=BECN1<br>PE=1 SV=2 - [BECN1_HUMAN]                                                     | 8.22  | 1 | 4  | 4  | 10  | 0.789 | 0.898 | 0.990 | 0.915 | 19.12  | 8.22  | 5  | 10  | 450  | 51.9  | 4.89 |
| P00736 | Complement C1r subcomponent<br>OS=Homo sapiens<br>GN=C1R PE=1 SV=2 - [C1R_HUMAN]                                        | 1.84  | 1 | 2  | 2  | 3   | 1.077 | 1.503 | 0.969 | 0.915 | 5.78   | 1.84  | 3  | 3   | 705  | 80.1  | 6.21 |
| Q13325 | Interferon-induced protein with tetratricopeptide repeats 5<br>OS=Homo sapiens<br>GN=IFIT5<br>PE=1 SV=1 - [IFIT5_HUMAN] | 11.41 | 2 | 4  | 6  | 15  | 1.288 | 0.740 | 1.021 | 0.915 | 41.05  | 11.41 | 10 | 15  | 482  | 55.8  | 7.40 |
| P52179 | Myomesin-1<br>OS=Homo sapiens<br>GN=MYOM1<br>PE=1 SV=2 - [MYOM1_HUMAN]                                                  | 2.61  | 1 | 3  | 4  | 4   | 0.530 | 0.538 | 0.720 | 0.916 | 6.93   | 2.61  | 4  | 4   | 1685 | 187.5 | 6.93 |
| Q8NHP6 | Motile sperm domain-containing protein 2<br>OS=Homo sapiens<br>GN=MOSPD2<br>PE=1 SV=1 - [MSPD2_HUMAN]                   | 13.32 | 1 | 9  | 9  | 19  | 1.091 | 0.427 | 0.785 | 0.916 | 33.04  | 13.32 | 14 | 19  | 518  | 59.7  | 5.96 |
| P23526 | Adenosylhomocysteinase<br>OS=Homo sapiens<br>GN=AHCY<br>PE=1 SV=4 - [SAHH_HUMAN]                                        | 46.99 | 1 | 19 | 21 | 166 | 0.913 | 0.857 | 0.923 | 0.916 | 421.34 | 46.99 | 36 | 166 | 432  | 47.7  | 6.34 |
| Q6ZWJ8 | Kielin/chordin-like protein<br>OS=Homo sapiens<br>GN=KCP PE=2 SV=2 - [KCP_HUMAN]                                        | 0.93  | 1 | 1  | 1  | 1   | 0.832 | 1.016 | 0.914 | 0.916 | 0.00   | 0.93  | 1  | 1   | 1503 | 159.8 | 5.74 |
| Q8IXQ6 | Poly [ADP-ribose] polymerase 9<br>OS=Homo sapiens<br>GN=PARP9<br>PE=1 SV=2 - [PARP9_HUMAN]                              | 8.20  | 1 | 7  | 7  | 18  | 1.919 | 1.128 | 0.984 | 0.916 | 28.07  | 8.20  | 10 | 18  | 854  | 96.3  | 7.91 |

|        |                                                                                                                            |       |   |    |    |    |       |       |       |       |        |       |    |    |      |       |      |
|--------|----------------------------------------------------------------------------------------------------------------------------|-------|---|----|----|----|-------|-------|-------|-------|--------|-------|----|----|------|-------|------|
| Q8WYA1 | Aryl hydrocarbon receptor nuclear translocator-like protein 2<br>OS=Homo sapiens<br>GN=ARNTL2<br>PE=1 SV=2 - [BMAL2_HUMAN] | 8.33  | 1 | 3  | 3  | 4  | 1.075 | 1.423 | 1.075 | 0.916 | 5.59   | 8.33  | 3  | 4  | 636  | 70.8  | 7.37 |
| P52746 | Zinc finger protein 142<br>OS=Homo sapiens<br>GN=ZNF142<br>PE=2 SV=4 - [ZNF142_HUMAN]                                      | 0.36  | 1 | 1  | 1  | 2  | 0.523 | 1.043 | 0.926 | 0.916 | 1.83   | 0.36  | 1  | 2  | 1687 | 187.8 | 7.91 |
| Q96B23 | Uncharacterized protein C18orf25<br>OS=Homo sapiens<br>GN=C18orf25<br>PE=1 SV=2 - [C18orf25_HUMAN]                         | 5.46  | 1 | 1  | 1  | 2  | 0.866 | 1.068 | 0.883 | 0.916 | 11.82  | 5.46  | 1  | 2  | 403  | 43.3  | 4.88 |
| Q6ZM10 | Protein phosphatase 1 regulatory subunit 21<br>OS=Homo sapiens<br>GN=PPP1R21<br>PE=1 SV=1 - [PPP1R21_HUMAN]                | 25.13 | 2 | 19 | 19 | 66 | 0.955 | 1.026 | 1.252 | 0.916 | 158.67 | 25.13 | 30 | 66 | 780  | 88.3  | 6.84 |
| O00142 | Thymidine kinase 2, mitochondrial<br>OS=Homo sapiens<br>GN=TK2 PE=1 SV=4 - [TK2_HUMAN]                                     | 3.40  | 1 | 1  | 1  | 2  | 0.899 | 0.917 | 0.995 | 0.916 | 2.46   | 3.40  | 2  | 2  | 265  | 31.0  | 8.46 |
| Q8TBY9 | WD repeat-containing protein 66<br>OS=Homo sapiens<br>GN=WDR66<br>PE=2 SV=2 - [WDR66_HUMAN]                                | 0.61  | 1 | 1  | 1  | 2  | 0.684 | 0.506 | 0.877 | 0.916 | 3.97   | 0.61  | 1  | 2  | 1149 | 129.9 | 5.08 |
| Q01814 | Plasma membrane calcium-transporting ATPase 2<br>OS=Homo sapiens<br>GN=ATP2B2<br>PE=1 SV=2 - [AT2B2_HUMAN]                 | 13.11 | 1 | 1  | 17 | 75 | 2.750 | 0.583 | 0.402 | 0.917 | 172.62 | 13.11 | 27 | 75 | 1243 | 136.8 | 5.91 |
| Q9NWZ3 | Interleukin-1 receptor-associated kinase 4<br>OS=Homo sapiens<br>GN=IRAK4<br>PE=1 SV=1 - [IRAK4_HUMAN]                     | 14.13 | 1 | 6  | 6  | 15 | 0.860 | 0.685 | 1.139 | 0.917 | 36.71  | 14.13 | 9  | 15 | 460  | 51.5  | 5.41 |

|        |                                                                                                                               |       |   |    |    |     |       |       |       |       |        |       |    |     |     |      |      |
|--------|-------------------------------------------------------------------------------------------------------------------------------|-------|---|----|----|-----|-------|-------|-------|-------|--------|-------|----|-----|-----|------|------|
| Q8M4Q1 | Mitochondrial intermembrane space import and assembly protein 40<br>OS=Homo sapiens<br>GN=CHCHD4<br>PE=1 SV=1 - [MIA40_HUMAN] | 11.97 | 1 | 2  | 2  | 4   | 1.029 | 0.902 | 0.791 | 0.917 | 7.25   | 11.97 | 3  | 4   | 142 | 16.0 | 4.31 |
| Q8IXB1 | DnaJ homolog subfamily C member 10<br>OS=Homo sapiens<br>GN=DNAJC10<br>PE=1 SV=2 - [DJC10_HUMAN]                              | 11.10 | 1 | 9  | 9  | 42  | 0.831 | 1.089 | 1.098 | 0.917 | 70.82  | 11.10 | 16 | 42  | 793 | 91.0 | 7.18 |
| O96011 | Peroxisomal membrane protein 11B<br>OS=Homo sapiens<br>GN=PEX11B<br>PE=1 SV=1 - [PX11B_HUMAN]                                 | 12.74 | 1 | 3  | 3  | 5   | 1.006 | 0.495 | 0.763 | 0.917 | 17.16  | 12.74 | 4  | 5   | 259 | 28.4 | 9.85 |
| P61204 | ADP-ribosylation factor 3<br>OS=Homo sapiens<br>GN=ARF3<br>PE=1 SV=2 - [ARF3_HUMAN]                                           | 55.25 | 4 | 5  | 11 | 217 | 1.113 | 0.835 | 0.905 | 0.917 | 435.01 | 55.25 | 19 | 217 | 181 | 20.6 | 7.43 |
| Q6PIU2 | Neutral cholesterol ester hydrolase 1<br>OS=Homo sapiens<br>GN=NCEH1<br>PE=1 SV=3 - [NCEH1_HUMAN]                             | 28.92 | 1 | 11 | 11 | 42  | 1.540 | 1.356 | 1.100 | 0.917 | 82.41  | 28.92 | 19 | 42  | 408 | 45.8 | 7.23 |
| Q96MG7 | Melanoma-associated antigen G1<br>OS=Homo sapiens<br>GN=NDNL2<br>PE=1 SV=1 - [MAGG1_HUMAN]                                    | 6.58  | 1 | 2  | 2  | 2   | 0.627 | 0.790 | 1.303 | 0.917 | 3.25   | 6.58  | 2  | 2   | 304 | 34.3 | 9.28 |
| P48729 | Casein kinase I isoform alpha<br>OS=Homo sapiens<br>GN=CSNK1A1<br>PE=1 SV=2 - [KC1A_HUMAN]                                    | 28.78 | 2 | 8  | 8  | 21  | 0.842 | 0.857 | 0.843 | 0.917 | 56.67  | 28.78 | 11 | 21  | 337 | 38.9 | 9.57 |
| Q9BVI4 | Nucleolar complex protein 4 homolog<br>OS=Homo sapiens<br>GN=NOC4L<br>PE=1 SV=1 - [NOC4L_HUMAN]                               | 7.95  | 1 | 3  | 3  | 4   | 0.832 | 0.502 | 0.942 | 0.917 | 15.07  | 7.95  | 3  | 4   | 516 | 58.4 | 7.49 |
| Q15046 | Lysine--tRNA ligase<br>OS=Homo sapiens<br>GN=KARS<br>PE=1 SV=3 - [SYK_HUMAN]                                                  | 41.37 | 1 | 27 | 27 | 164 | 0.907 | 0.890 | 0.804 | 0.917 | 409.34 | 41.37 | 48 | 164 | 597 | 68.0 | 6.35 |

|        |                                                                                                              |       |   |    |    |    |       |       |       |       |       |       |    |    |     |      |       |
|--------|--------------------------------------------------------------------------------------------------------------|-------|---|----|----|----|-------|-------|-------|-------|-------|-------|----|----|-----|------|-------|
| Q9H3P7 | Golgi resident protein GCP60<br>OS=Homo sapiens<br>GN=ACBD3<br>PE=1 SV=4 - [GCP60_HUMAN]                     | 29.73 | 1 | 11 | 11 | 44 | 0.885 | 0.915 | 0.990 | 0.917 | 92.77 | 29.73 | 16 | 44 | 528 | 60.6 | 5.06  |
| P56545 | C-terminal-binding protein 2<br>OS=Homo sapiens<br>GN=CTBP2<br>PE=1 SV=1 - [CTBP2_HUMAN]                     | 18.65 | 1 | 4  | 7  | 21 | 0.952 | 1.080 | 0.984 | 0.918 | 58.85 | 18.65 | 12 | 21 | 445 | 48.9 | 6.95  |
| Q9UDY4 | DnaJ homolog subfamily B member 4<br>OS=Homo sapiens<br>GN=DNAJB4<br>PE=1 SV=1 - [DNAJB4_HUMAN]              | 35.91 | 1 | 8  | 9  | 30 | 0.442 | 1.196 | 1.527 | 0.918 | 71.52 | 35.91 | 13 | 30 | 337 | 37.8 | 8.50  |
| Q9HD34 | LYR motif-containing protein 4<br>OS=Homo sapiens<br>GN=LYRM4<br>PE=1 SV=1 - [LYRM4_HUMAN]                   | 37.36 | 1 | 3  | 3  | 5  | 1.038 | 0.981 | 1.030 | 0.918 | 6.86  | 37.36 | 5  | 5  | 91  | 10.8 | 10.73 |
| Q96P44 | Collagen alpha-1(XI) chain<br>OS=Homo sapiens<br>GN=COL21A1<br>PE=2 SV=1 - [COLA1_HUMAN]                     | 5.12  | 1 | 2  | 3  | 4  | 0.634 | 0.839 | 1.244 | 0.918 | 6.16  | 5.12  | 3  | 4  | 957 | 99.3 | 8.32  |
| P25686 | DnaJ homolog subfamily B member 2<br>OS=Homo sapiens<br>GN=DNAJB2<br>PE=1 SV=3 - [DNAJB2_HUMAN]              | 8.95  | 2 | 2  | 3  | 12 | 0.929 | 1.164 | 0.757 | 0.918 | 30.60 | 8.95  | 4  | 12 | 324 | 35.6 | 5.95  |
| Q96GX1 | Tectonic-2<br>OS=Homo sapiens<br>GN=TCTN2<br>PE=2 SV=1 - [TECT2_HUMAN]                                       | 3.59  | 1 | 2  | 2  | 2  | 0.961 | 0.919 | 0.730 | 0.918 | 2.04  | 3.59  | 2  | 2  | 697 | 76.8 | 5.24  |
| Q8WWC4 | Uncharacterized protein C2orf47, mitochondrial<br>OS=Homo sapiens<br>GN=C2orf47<br>PE=1 SV=1 - [CB047_HUMAN] | 5.84  | 1 | 2  | 2  | 4  | 0.863 | 0.770 | 0.950 | 0.918 | 7.97  | 5.84  | 3  | 4  | 291 | 32.5 | 9.17  |
| O60861 | Growth arrest-specific protein 7<br>OS=Homo sapiens<br>GN=GAS7<br>PE=1 SV=3 - [GAS7_HUMAN]                   | 1.47  | 1 | 1  | 1  | 2  | 1.750 | 0.634 | 1.050 | 0.918 | 2.02  | 1.47  | 2  | 2  | 476 | 54.3 | 7.34  |



|        |                                                                                                                             |       |   |    |    |     |       |       |       |       |        |       |    |     |     |      |      |
|--------|-----------------------------------------------------------------------------------------------------------------------------|-------|---|----|----|-----|-------|-------|-------|-------|--------|-------|----|-----|-----|------|------|
| Q9NVH1 | DnaJ homolog subfamily C member 11<br>OS=Homo sapiens<br>GN=DNAJC11<br>PE=1 SV=2 - [DJC11_HUMAN]                            | 12.88 | 1 | 6  | 6  | 12  | 0.922 | 0.944 | 0.939 | 0.918 | 27.81  | 12.88 | 9  | 12  | 559 | 63.2 | 8.40 |
| Q9BZV1 | UBX domain-containing protein 6<br>OS=Homo sapiens<br>GN=UBXN6<br>PE=1 SV=1 - [UBXN6_HUMAN]                                 | 16.55 | 1 | 5  | 5  | 16  | 1.108 | 1.249 | 1.268 | 0.918 | 40.23  | 16.55 | 8  | 16  | 441 | 49.7 | 6.89 |
| Q13627 | Dual specificity tyrosine-phosphorylation-regulated kinase 1A<br>OS=Homo sapiens<br>GN=DYRK1A<br>PE=1 SV=2 - [DYRK1A_HUMAN] | 2.10  | 1 | 1  | 1  | 4   | 1.130 | 1.390 | 1.023 | 0.919 | 11.04  | 2.10  | 2  | 4   | 763 | 85.5 | 8.75 |
| Q13561 | Dynactin subunit 2<br>OS=Homo sapiens<br>GN=DCTN2<br>PE=1 SV=4 - [DCTN2_HUMAN]                                              | 54.86 | 2 | 21 | 22 | 154 | 1.094 | 1.093 | 1.099 | 0.919 | 394.61 | 54.86 | 35 | 154 | 401 | 44.2 | 5.21 |
| Q93034 | Cullin-5<br>OS=Homo sapiens<br>GN=CUL5 PE=1 SV=4 - [CUL5_HUMAN]                                                             | 23.85 | 1 | 19 | 19 | 59  | 1.172 | 0.800 | 0.875 | 0.919 | 135.08 | 23.85 | 28 | 59  | 780 | 90.9 | 7.94 |
| Q96MW1 | Coiled-coil domain-containing protein 43<br>OS=Homo sapiens<br>GN=CCDC43<br>PE=1 SV=2 - [CCDC43_HUMAN]                      | 16.07 | 1 | 3  | 3  | 12  | 0.952 | 0.819 | 0.945 | 0.919 | 26.57  | 16.07 | 5  | 12  | 224 | 25.2 | 4.92 |
| Q8NBK3 | Sulfatase-modifying factor 1<br>OS=Homo sapiens<br>GN=SUMF1<br>PE=1 SV=3 - [SUMF1_HUMAN]                                    | 7.22  | 1 | 2  | 2  | 7   | 1.120 | 0.984 | 1.248 | 0.919 | 19.73  | 7.22  | 4  | 7   | 374 | 40.5 | 6.65 |
| Q8TB22 | Spermatogenesis-associated protein 20<br>OS=Homo sapiens<br>GN=SPATA20<br>PE=2 SV=3 - [SPT20_HUMAN]                         | 17.68 | 1 | 12 | 12 | 30  | 1.285 | 1.198 | 1.204 | 0.919 | 69.79  | 17.68 | 19 | 30  | 786 | 87.8 | 7.43 |
| P41214 | Eukaryotic translation initiation factor 2D<br>OS=Homo sapiens<br>GN=EIF2D<br>PE=1 SV=3 - [EIF2D_HUMAN]                     | 11.47 | 1 | 5  | 6  | 20  | 1.112 | 1.151 | 1.179 | 0.919 | 28.67  | 11.47 | 8  | 20  | 584 | 64.7 | 7.65 |

|         |                                                                                                                          |       |   |    |    |    |       |       |       |       |        |       |    |    |     |      |      |
|---------|--------------------------------------------------------------------------------------------------------------------------|-------|---|----|----|----|-------|-------|-------|-------|--------|-------|----|----|-----|------|------|
| Q9NPNY3 | Complement component C1q receptor OS=Homo sapiens GN=CD93 PE=1 SV=3 - [C1QR1_HUMAN]                                      | 4.75  | 1 | 3  | 3  | 4  | 0.991 | 0.953 | 1.137 | 0.919 | 6.40   | 4.75  | 3  | 4  | 652 | 68.5 | 5.44 |
| O75348  | V-type proton ATPase subunit G 1 OS=Homo sapiens GN=ATP6V1G1 PE=1 SV=3 - [VATG1_HUMAN]                                   | 32.20 | 1 | 4  | 4  | 35 | 1.086 | 1.074 | 0.807 | 0.919 | 80.73  | 32.20 | 7  | 35 | 118 | 13.7 | 8.79 |
| Q96I18  | Leucine-rich repeat and calponin homology domain-containing protein 3 OS=Homo sapiens GN=LRCH3 PE=1 SV=2 - [LRCH3_HUMAN] | 10.04 | 1 | 5  | 6  | 17 | 0.978 | 1.191 | 0.878 | 0.919 | 32.32  | 10.04 | 11 | 17 | 777 | 86.0 | 6.71 |
| P54803  | Galactocerebroside OS=Homo sapiens GN=GALC PE=1 SV=2 - [GALC_HUMAN]                                                      | 11.53 | 1 | 5  | 5  | 10 | 1.472 | 0.962 | 0.889 | 0.919 | 16.95  | 11.53 | 9  | 10 | 685 | 77.0 | 6.64 |
| Q5VZ18  | SH2 domain-containing adapter protein E OS=Homo sapiens GN=SHE PE=1 SV=1 - [SHE_HUMAN]                                   | 1.82  | 1 | 1  | 1  | 1  | 0.777 | 0.435 | 0.502 | 0.919 | 2.43   | 1.82  | 1  | 1  | 495 | 53.9 | 9.16 |
| P61011  | Signal recognition particle 54 kDa protein OS=Homo sapiens GN=SRP54 PE=1 SV=1 - [SRP54_HUMAN]                            | 39.88 | 1 | 20 | 20 | 80 | 0.811 | 0.892 | 0.865 | 0.919 | 192.98 | 39.88 | 30 | 80 | 504 | 55.7 | 8.75 |
| O15530  | 3-phosphoinositide-dependent protein kinase 1 OS=Homo sapiens GN=PDPK1 PE=1 SV=1 - [PDPK1_HUMAN]                         | 17.63 | 2 | 7  | 7  | 9  | 0.837 | 0.815 | 0.981 | 0.920 | 19.34  | 17.63 | 9  | 9  | 556 | 63.1 | 7.36 |
| Q9NPJ3  | Acyl-coenzyme A thioesterase 13 OS=Homo sapiens GN=ACOT13 PE=1 SV=1 - [ACO13_HUMAN]                                      | 26.43 | 1 | 3  | 3  | 6  | 0.966 | 0.563 | 0.428 | 0.920 | 17.28  | 26.43 | 4  | 6  | 140 | 15.0 | 9.14 |

|        |                                                                                                                            |       |   |    |    |     |       |       |       |       |        |       |    |     |      |       |       |
|--------|----------------------------------------------------------------------------------------------------------------------------|-------|---|----|----|-----|-------|-------|-------|-------|--------|-------|----|-----|------|-------|-------|
| Q8NGI4 | Olfactory receptor 4D11<br>OS=Homo sapiens<br>GN=OR4D11<br>PE=2 SV=1 - [OR4DB_HUMAN]                                       | 3.22  | 1 | 1  | 1  | 2   | 1.379 | 0.696 | 0.953 | 0.920 | 5.33   | 3.22  | 1  | 2   | 311  | 34.9  | 8.75  |
| Q99653 | Caldineurin B homologous protein 1<br>OS=Homo sapiens<br>GN=CHP1<br>PE=1 SV=3 - [CHP1_HUMAN]                               | 77.44 | 1 | 13 | 13 | 32  | 0.985 | 1.027 | 1.071 | 0.920 | 82.35  | 77.44 | 19 | 32  | 195  | 22.4  | 5.10  |
| P13533 | Myosin-6<br>OS=Homo sapiens<br>GN=MYH6<br>PE=1 SV=5 - [MYH6_HUMAN]                                                         | 6.24  | 1 | 2  | 12 | 81  | 0.623 | 0.810 | 0.775 | 0.920 | 151.23 | 6.24  | 15 | 81  | 1939 | 223.6 | 5.73  |
| Q66PJ3 | ADP-ribosylation factor-like protein 6-interacting protein 4<br>OS=Homo sapiens<br>GN=ARL6IP4<br>PE=1 SV=2 - [AR6P4_HUMAN] | 4.51  | 1 | 1  | 1  | 1   | 0.947 | 1.272 | 1.695 | 0.920 | 4.59   | 4.51  | 1  | 1   | 421  | 44.9  | 10.93 |
| O00469 | Procollagen-lysine,2-oxoglutarate 5-dioxygenase 2<br>OS=Homo sapiens<br>GN=PLOD2<br>PE=1 SV=2 - [PLOD2_HUMAN]              | 34.60 | 1 | 26 | 26 | 150 | 0.814 | 0.705 | 0.866 | 0.920 | 346.87 | 34.60 | 45 | 150 | 737  | 84.6  | 6.71  |
| Q8NBN3 | Transmembrane protein 87A<br>OS=Homo sapiens<br>GN=TMEM87A<br>PE=1 SV=3 - [TM87A_HUMAN]                                    | 12.25 | 1 | 8  | 8  | 17  | 0.875 | 0.793 | 0.861 | 0.920 | 44.89  | 12.25 | 10 | 17  | 555  | 63.4  | 6.74  |
| Q8N6G6 | ADAMTS-like protein 1<br>OS=Homo sapiens<br>GN=ADAMTSL1<br>PE=1 SV=4 - [ATL1_HUMAN]                                        | 0.91  | 1 | 1  | 1  | 1   | 2.998 | 0.815 | 1.068 | 0.920 | 0.00   | 0.91  | 1  | 1   | 1762 | 193.3 | 7.80  |
| P42677 | 40S ribosomal protein S27<br>OS=Homo sapiens<br>GN=RPS27<br>PE=1 SV=3 - [RS27_HUMAN]                                       | 40.48 | 1 | 2  | 5  | 39  | 1.265 | 0.865 | 0.883 | 0.920 | 103.49 | 40.48 | 10 | 39  | 84   | 9.5   | 9.45  |
| Q9BYG8 | Gasdermin-C<br>OS=Homo sapiens<br>GN=GSDMC<br>PE=2 SV=3 - [GSDMC_HUMAN]                                                    | 3.94  | 1 | 2  | 2  | 3   | 0.838 | 0.621 | 0.797 | 0.920 | 2.00   | 3.94  | 2  | 3   | 508  | 57.7  | 5.78  |

|        |                                                                                                                                                |       |   |    |    |     |       |       |       |       |        |       |    |     |     |      |      |
|--------|------------------------------------------------------------------------------------------------------------------------------------------------|-------|---|----|----|-----|-------|-------|-------|-------|--------|-------|----|-----|-----|------|------|
| Q9HAV7 | GrpE protein homolog 1, mitochondrial<br>OS=Homo sapiens<br>GN=GRPEL1<br>PE=1 SV=2 - [GRPE1_HUMAN]                                             | 41.47 | 1 | 9  | 10 | 52  | 0.957 | 0.902 | 1.002 | 0.920 | 115.95 | 41.47 | 15 | 52  | 217 | 24.3 | 8.12 |
| Q00537 | Cylin-dependent kinase 17<br>OS=Homo sapiens<br>GN=CDK17<br>PE=1 SV=2 - [CDK17_HUMAN]                                                          | 6.50  | 6 | 2  | 4  | 17  | 1.061 | 1.143 | 1.104 | 0.920 | 28.91  | 6.50  | 5  | 17  | 523 | 59.5 | 9.03 |
| O96007 | Molybdopterinsynthase catalytic subunit<br>OS=Homo sapiens<br>GN=MOCS2<br>PE=1 SV=1 - [MOCS2_HUMAN]                                            | 21.28 | 1 | 5  | 5  | 11  | 1.075 | 1.108 | 1.156 | 0.920 | 14.79  | 21.28 | 9  | 11  | 188 | 20.9 | 5.44 |
| Q9GZM5 | Protein YIPF3<br>OS=Homo sapiens<br>GN=YIPF3<br>PE=1 SV=1 - [YIPF3_HUMAN]                                                                      | 18.29 | 1 | 5  | 5  | 14  | 0.803 | 0.693 | 0.811 | 0.920 | 36.37  | 18.29 | 8  | 14  | 350 | 38.2 | 5.76 |
| Q16537 | Serine/threonine-protein phosphatase 2A 56 kDa regulatory subunit epsilon isoform<br>OS=Homo sapiens<br>GN=PPP2R5E<br>PE=1 SV=1 - [2A5E_HUMAN] | 30.19 | 1 | 8  | 11 | 35  | 1.129 | 0.970 | 0.862 | 0.920 | 93.53  | 30.19 | 16 | 35  | 467 | 54.7 | 6.95 |
| P43686 | 26S protease regulatory subunit 6B<br>OS=Homo sapiens<br>GN=PSMC4<br>PE=1 SV=2 - [PRS6B_HUMAN]                                                 | 59.33 | 1 | 20 | 21 | 131 | 0.856 | 1.029 | 0.982 | 0.921 | 342.92 | 59.33 | 36 | 131 | 418 | 47.3 | 5.21 |
| Q15629 | Translocating chain-associated membrane protein 1<br>OS=Homo sapiens<br>GN=TRAM1<br>PE=1 SV=3 - [TRAM1_HUMAN]                                  | 13.64 | 1 | 5  | 5  | 7   | 1.109 | 0.664 | 0.613 | 0.921 | 17.00  | 13.64 | 6  | 7   | 374 | 43.0 | 9.63 |
| P49903 | Selenide, water dikinase 1<br>OS=Homo sapiens<br>GN=SEPHS1<br>PE=1 SV=2 - [SPS1_HUMAN]                                                         | 16.33 | 2 | 5  | 5  | 7   | 1.097 | 1.079 | 1.087 | 0.921 | 24.74  | 16.33 | 6  | 7   | 392 | 42.9 | 5.97 |

|        |                                                                                                                  |       |   |    |    |     |       |       |       |       |        |       |    |     |      |       |       |
|--------|------------------------------------------------------------------------------------------------------------------|-------|---|----|----|-----|-------|-------|-------|-------|--------|-------|----|-----|------|-------|-------|
| Q96K21 | Abscission/NoCut checkpoint regulator<br>OS=Homo sapiens<br>GN=ZFYVE19<br>PE=1 SV=3 - [ANCHR_HUMAN]              | 8.92  | 1 | 3  | 5  | 20  | 1.104 | 1.019 | 0.789 | 0.921 | 37.29  | 8.92  | 6  | 20  | 471  | 51.5  | 5.73  |
| Q8IZU2 | WD repeat-containing protein 17<br>OS=Homo sapiens<br>GN=WDR17<br>PE=2 SV=2 - [WDR17_HUMAN]                      | 1.29  | 1 | 2  | 2  | 2   | 1.168 | 0.749 | 0.480 | 0.921 | 4.21   | 1.29  | 2  | 2   | 1322 | 147.6 | 6.46  |
| Q7Z624 | Calmodulin-lysine N-methyltransferase<br>OS=Homo sapiens<br>GN=CAMKMT<br>PE=1 SV=2 - [CMKMT_HUMAN]               | 5.88  | 1 | 1  | 2  | 3   | 1.152 | 0.796 | 2.101 | 0.921 | 4.42   | 5.88  | 3  | 3   | 323  | 36.1  | 6.83  |
| Q69YQ0 | Cytospin-A<br>OS=Homo sapiens<br>GN=SPECC1L<br>PE=1 SV=2 - [CYTSA_HUMAN]                                         | 31.78 | 5 | 30 | 32 | 127 | 1.000 | 1.206 | 1.158 | 0.921 | 328.05 | 31.78 | 53 | 127 | 1117 | 124.5 | 5.72  |
| Q6ZS94 | Putative uncharacterized protein C1orf229<br>OS=Homo sapiens<br>GN=C1orf229<br>PE=2 SV=1 - [CA229_HUMAN]         | 8.44  | 1 | 1  | 1  | 1   | 0.744 | 1.173 |       | 0.921 | 2.35   | 8.44  | 1  | 1   | 237  | 24.3  | 11.59 |
| Q9UI95 | Mitotic spindle assembly checkpoint protein MAD2B<br>OS=Homo sapiens<br>GN=MAD2L2<br>PE=1 SV=2 - [MD2L2_HUMAN]   | 3.79  | 1 | 1  | 1  | 1   | 0.585 | 0.683 | 0.699 | 0.921 | 0.00   | 3.79  | 1  | 1   | 211  | 24.3  | 6.52  |
| P20020 | Plasma membrane calcium-transporting ATPase 1<br>OS=Homo sapiens<br>GN=ATP2B1<br>PE=1 SV=3 - [AT2B1_HUMAN]       | 29.17 | 1 | 13 | 36 | 154 | 0.833 | 0.737 | 0.875 | 0.921 | 365.61 | 29.17 | 60 | 154 | 1258 | 138.7 | 6.04  |
| P05496 | ATP synthase F(0) complex subunit C1, mitochondrial<br>OS=Homo sapiens<br>GN=ATP5G1<br>PE=2 SV=2 - [AT5G1_HUMAN] | 5.15  | 3 | 1  | 1  | 5   | 0.803 | 0.843 | 1.047 | 0.921 | 8.53   | 5.15  | 1  | 5   | 136  | 14.3  | 9.74  |

|        |                                                                                                       |       |   |    |    |     |       |       |       |       |        |       |    |     |      |       |      |
|--------|-------------------------------------------------------------------------------------------------------|-------|---|----|----|-----|-------|-------|-------|-------|--------|-------|----|-----|------|-------|------|
| Q9GZNI | Actin-related protein 6<br>OS=Homo sapiens<br>GN=ACTR6<br>PE=1 SV=1 - [ARP6_HUMAN]                    | 3.79  | 1 | 1  | 1  | 1   | 1.102 | 0.646 | 1.177 | 0.922 | 2.34   | 3.79  | 1  | 1   | 396  | 45.8  | 5.03 |
| Q53H12 | Acylglycerol kinase, mitochondrial<br>OS=Homo sapiens<br>GN=AGK PE=1 SV=2 - [AGK_HUMAN]               | 14.69 | 1 | 5  | 5  | 9   | 0.916 | 0.790 | 0.791 | 0.922 | 21.16  | 14.69 | 5  | 9   | 422  | 47.1  | 8.09 |
| Q96EC8 | Protein YIPF6<br>OS=Homo sapiens<br>GN=YIPF6<br>PE=1 SV=2 - [YIPF6_HUMAN]                             | 5.08  | 1 | 1  | 1  | 7   | 1.081 | 0.827 | 0.973 | 0.922 | 12.03  | 5.08  | 2  | 7   | 236  | 26.2  | 5.64 |
| Q96C74 | Ropporin-1-like protein<br>OS=Homo sapiens<br>GN=ROPN1L<br>PE=1 SV=2 - [ROP1L_HUMAN]                  | 3.91  | 1 | 1  | 1  | 2   | 1.117 | 0.910 | 0.692 | 0.922 | 4.38   | 3.91  | 1  | 2   | 230  | 26.1  | 7.72 |
| P47224 | Guanine nucleotide exchange factor MSS4<br>OS=Homo sapiens<br>GN=RABIF<br>PE=1 SV=2 - [MSS4_HUMAN]    | 12.20 | 1 | 2  | 2  | 2   | 0.923 | 0.943 | 1.185 | 0.922 | 4.25   | 12.20 | 2  | 2   | 123  | 13.8  | 5.52 |
| P06748 | Nudeophosmin<br>OS=Homo sapiens<br>GN=NPM1<br>PE=1 SV=2 - [NPM_HUMAN]                                 | 45.24 | 1 | 17 | 18 | 379 | 0.730 | 0.886 | 0.776 | 0.922 | 932.24 | 45.24 | 25 | 379 | 294  | 32.6  | 4.78 |
| Q13003 | Glutamate receptor ionotropic, kainate 3<br>OS=Homo sapiens<br>GN=GRIK3<br>PE=2 SV=3 - [GRIK3_HUMAN]  | 1.63  | 1 | 1  | 1  | 1   | 0.818 | 1.111 | 1.336 | 0.922 | 2.64   | 1.63  | 1  | 1   | 919  | 104.0 | 7.52 |
| P12544 | Granzyme A<br>OS=Homo sapiens<br>GN=GZMA<br>PE=1 SV=2 - [GRAA_HUMAN]                                  | 12.21 | 1 | 2  | 2  | 3   | 1.163 | 0.761 | 0.750 | 0.922 | 2.73   | 12.21 | 2  | 3   | 262  | 29.0  | 8.91 |
| Q96PZ7 | CUB and sushi domain-containing protein 1<br>OS=Homo sapiens<br>GN=CSMD1<br>PE=1 SV=2 - [CSMD1_HUMAN] | 0.39  | 1 | 1  | 1  | 1   | 0.971 | 0.748 | 1.245 | 0.922 | 2.93   | 0.39  | 1  | 1   | 3565 | 388.6 | 6.07 |

|        |                                                                                                    |       |   |    |    |     |       |       |       |       |        |       |    |     |      |       |      |
|--------|----------------------------------------------------------------------------------------------------|-------|---|----|----|-----|-------|-------|-------|-------|--------|-------|----|-----|------|-------|------|
| Q66K14 | TBC1 domain family member 9B OS=Homo sapiens<br>GN=TBC1D9B<br>PE=1 SV=3 - [TBC9B_HUMAN]            | 13.68 | 1 | 14 | 14 | 39  | 1.120 | 1.163 | 1.175 | 0.922 | 112.94 | 13.68 | 21 | 39  | 1250 | 140.4 | 5.25 |
| Q9HZK8 | Serine/threonine-protein kinase TAO3 OS=Homo sapiens<br>GN=TAOK3<br>PE=1 SV=2 - [TAOK3_HUMAN]      | 15.48 | 1 | 10 | 13 | 35  | 0.843 | 1.018 | 0.908 | 0.923 | 80.19  | 15.48 | 17 | 35  | 898  | 105.3 | 7.30 |
| Q07352 | Zinc finger protein 36, C3H1 type-like 1 OS=Homo sapiens<br>GN=ZFP36L1<br>PE=1 SV=1 - [TISB_HUMAN] | 12.72 | 1 | 5  | 5  | 14  | 1.132 | 0.896 | 1.340 | 0.923 | 29.95  | 12.72 | 9  | 14  | 338  | 36.3  | 7.96 |
| Q86W56 | Poly(ADP-ribose) glycohydrolase OS=Homo sapiens<br>GN=PARG<br>PE=1 SV=1 - [PARG_HUMAN]             | 1.54  | 1 | 2  | 2  | 2   | 0.842 | 0.954 | 1.134 | 0.923 | 2.88   | 1.54  | 2  | 2   | 976  | 111.0 | 6.43 |
| Q15836 | Vesicle-associated membrane protein 3 OS=Homo sapiens<br>GN=VAMP3<br>PE=1 SV=3 - [VAMP3_HUMAN]     | 50.00 | 2 | 2  | 6  | 125 | 0.775 | 0.932 | 0.930 | 0.923 | 352.69 | 50.00 | 11 | 125 | 100  | 11.3  | 8.79 |
| O43708 | Methylacetate isomerase OS=Homo sapiens<br>GN=GSTZ1<br>PE=1 SV=3 - [MAAI_HUMAN]                    | 25.46 | 1 | 6  | 7  | 11  | 1.129 | 1.060 | 0.667 | 0.923 | 17.78  | 25.46 | 9  | 11  | 216  | 24.2  | 8.54 |
| Q68CZ2 | Tensin-3 OS=Homo sapiens<br>GN=TNS3<br>PE=1 SV=2 - [TENS3_HUMAN]                                   | 20.00 | 1 | 18 | 21 | 77  | 1.554 | 0.795 | 0.980 | 0.923 | 196.35 | 20.00 | 31 | 77  | 1445 | 155.2 | 6.81 |
| Q9NX55 | Huntingtin-interacting protein K OS=Homo sapiens<br>GN=HYPK<br>PE=1 SV=2 - [HYPK_HUMAN]            | 42.64 | 1 | 4  | 4  | 22  | 0.987 | 0.891 | 0.793 | 0.923 | 74.78  | 42.64 | 7  | 22  | 129  | 14.7  | 4.93 |
| Q9H6U6 | Breast carcinoma-amplified sequence 3 OS=Homo sapiens<br>GN=BCAS3<br>PE=1 SV=3 - [BCAS3_HUMAN]     | 5.60  | 1 | 4  | 4  | 5   | 0.847 | 1.207 | 1.013 | 0.923 | 7.53   | 5.60  | 4  | 5   | 928  | 101.2 | 6.70 |

|        |                                                                                                                                                                                                                              |       |   |    |    |     |       |       |       |       |        |       |    |     |      |       |      |
|--------|------------------------------------------------------------------------------------------------------------------------------------------------------------------------------------------------------------------------------|-------|---|----|----|-----|-------|-------|-------|-------|--------|-------|----|-----|------|-------|------|
| Q9BSD7 | Cancer-related<br>nucleoside-<br>triphosphatase<br>OS=Homo<br>sapiens<br>GN=NTPCR<br>PE=1 SV=1 -<br>[NTPCR_HUMAN<br>]<br>Cytochrome c-<br>type heme<br>lyase<br>OS=Homo<br>sapiens<br>GN=HCCS<br>PE=1 SV=1 -<br>[CCHL_HUMAN] | 36.32 | 1 | 6  | 7  | 46  | 1.052 | 1.041 | 0.879 | 0.924 | 115.18 | 36.32 | 11 | 46  | 190  | 20.7  | 9.54 |
| P53701 | CAD protein<br>OS=Homo<br>sapiens<br>GN=CAD<br>PE=1<br>SV=3 -<br>[PYR1_HUMAN]                                                                                                                                                | 21.27 | 1 | 7  | 7  | 19  | 0.806 | 0.779 | 0.883 | 0.924 | 38.68  | 21.27 | 13 | 19  | 268  | 30.6  | 6.68 |
| P27708 | Mitotic-spindle<br>organizing<br>protein 1<br>OS=Homo<br>sapiens<br>GN=MZT1<br>PE=1 SV=2 -<br>[MZT1_HUMAN]                                                                                                                   | 19.64 | 1 | 33 | 36 | 109 | 0.860 | 0.927 | 0.750 | 0.924 | 286.42 | 19.64 | 55 | 109 | 2225 | 242.8 | 6.46 |
| Q08AG7 | Carboxypeptida<br>se D OS=Homo<br>sapiens<br>GN=CPD<br>PE=1<br>SV=2 -<br>[CBPD_HUMAN]                                                                                                                                        | 21.95 | 1 | 2  | 2  | 2   | 1.267 | 0.866 | 0.877 | 0.924 | 5.25   | 21.95 | 2  | 2   | 82   | 8.5   | 4.78 |
| O75976 | U6 snRNA-<br>associated Sm-<br>like protein<br>LSm7<br>OS=Homo<br>sapiens<br>GN=LSM7<br>PE=1 SV=1 -<br>[LSM7_HUMAN]                                                                                                          | 20.22 | 2 | 26 | 26 | 73  | 0.714 | 1.083 | 1.146 | 0.924 | 185.96 | 20.22 | 37 | 73  | 1380 | 152.8 | 6.05 |
| Q9UK45 | COP9<br>signalosome<br>complex<br>subunit 2<br>OS=Homo<br>sapiens<br>GN=COPS2<br>PE=1 SV=1 -<br>[CSN2_HUMAN]                                                                                                                 | 40.78 | 1 | 3  | 4  | 10  | 0.942 | 0.976 | 1.060 | 0.924 | 29.75  | 40.78 | 5  | 10  | 103  | 11.6  | 5.27 |
| P61201 | Nuclear<br>receptor-<br>binding factor<br>2 OS=Homo<br>sapiens<br>GN=NRBF2<br>PE=1 SV=1 -<br>[NRBF2_HUMAN]                                                                                                                   | 32.73 | 1 | 13 | 13 | 50  | 0.948 | 0.957 | 0.945 | 0.924 | 132.77 | 32.73 | 21 | 50  | 443  | 51.6  | 5.53 |
| Q96F24 | Epidermal<br>growth factor<br>receptor<br>substrate 15-<br>like 1<br>OS=Homo<br>sapiens<br>GN=EPS15L1<br>PE=1 SV=1 -<br>[EP15R_HUMAN]                                                                                        | 26.13 | 1 | 5  | 6  | 14  | 0.710 | 0.861 | 1.218 | 0.924 | 36.15  | 26.13 | 9  | 14  | 287  | 32.4  | 5.87 |
| Q9UBC2 |                                                                                                                                                                                                                              | 26.62 | 1 | 18 | 18 | 63  | 1.108 | 1.025 | 0.854 | 0.924 | 158.46 | 26.62 | 27 | 63  | 864  | 94.2  | 5.11 |



|        |                                                                                                                |       |   |    |    |     |       |       |       |       |         |       |     |     |      |       |      |
|--------|----------------------------------------------------------------------------------------------------------------|-------|---|----|----|-----|-------|-------|-------|-------|---------|-------|-----|-----|------|-------|------|
| Q9H4A5 | Golgi phosphoprotein 3-like<br>OS=Homo sapiens<br>GN=GOLPH3L<br>PE=1 SV=1 - [GLP3L_HUMAN]                      | 31.93 | 1 | 8  | 9  | 21  | 1.065 | 0.998 | 1.290 | 0.924 | 58.75   | 31.93 | 12  | 21  | 285  | 32.7  | 5.83 |
| Q2M329 | Coiled-coil domain-containing protein 96<br>OS=Homo sapiens<br>GN=CCDC96<br>PE=2 SV=2 - [CCD96_HUMAN]          | 1.26  | 1 | 1  | 1  | 2   | 0.775 | 0.544 | 0.611 | 0.924 | 4.23    | 1.26  | 1   | 2   | 555  | 62.7  | 4.94 |
| Q6ZRK6 | Coiled-coil domain-containing protein 73<br>OS=Homo sapiens<br>GN=CCDC73<br>PE=2 SV=2 - [CCD73_HUMAN]          | 2.87  | 1 | 3  | 3  | 5   | 0.527 | 0.630 | 0.598 | 0.924 | 12.38   | 2.87  | 3   | 5   | 1079 | 124.1 | 5.58 |
| Q99973 | Telomerase protein component 1<br>OS=Homo sapiens<br>GN=TEP1<br>PE=1 SV=2 - [TEP1_HUMAN]                       | 3.65  | 1 | 8  | 8  | 13  | 0.890 | 1.092 | 0.832 | 0.924 | 27.71   | 3.65  | 10  | 13  | 2627 | 290.3 | 7.97 |
| Q9NP56 | cAMP-specific 3',5'-cyclic phosphodiesterase 7B<br>OS=Homo sapiens<br>GN=PDE7B<br>PE=1 SV=1 - [PDE7B_HUMAN]    | 6.00  | 1 | 1  | 2  | 3   | 0.616 | 0.754 | 0.760 | 0.925 | 6.68    | 6.00  | 2   | 3   | 450  | 51.8  | 7.03 |
| O00116 | Alkyldihydroxyacetonephosphate synthase, peroxisomal<br>OS=Homo sapiens<br>GN=AGPS<br>PE=1 SV=1 - [ADAS_HUMAN] | 23.71 | 1 | 13 | 13 | 61  | 0.965 | 0.860 | 1.108 | 0.925 | 174.38  | 23.71 | 22  | 61  | 658  | 72.9  | 7.34 |
| P26038 | Moesin<br>OS=Homo sapiens<br>GN=MSN PE=1 SV=3 - [MOES_HUMAN]                                                   | 71.06 | 1 | 50 | 64 | 941 | 1.002 | 1.135 | 1.216 | 0.925 | 2381.77 | 71.06 | 104 | 941 | 577  | 67.8  | 6.40 |
| Q13432 | Protein unc-119 homolog A<br>OS=Homo sapiens<br>GN=UNC119<br>PE=1 SV=1 - [U119A_HUMAN]                         | 8.33  | 1 | 2  | 2  | 2   | 1.026 | 0.742 | 1.112 | 0.925 | 2.25    | 8.33  | 2   | 2   | 240  | 26.9  | 6.42 |

|        |                                                                                                                    |       |   |    |    |    |       |       |       |       |        |       |    |    |     |       |       |
|--------|--------------------------------------------------------------------------------------------------------------------|-------|---|----|----|----|-------|-------|-------|-------|--------|-------|----|----|-----|-------|-------|
| Q9BY50 | Signal<br>peptidase<br>complex<br>catalytic<br>subunit<br>SEC11C<br>OS=Homo<br>sapiens<br>GN=SEC11C<br>PE=1 SV=3 - | 7.81  | 1 | 2  | 2  | 9  | 0.991 | 0.853 | 1.144 | 0.925 | 22.50  | 7.81  | 3  | 9  | 192 | 21.5  | 9.20  |
| Q9Y3U8 | 60S ribosomal<br>protein L36<br>OS=Homo<br>sapiens<br>GN=RPL36<br>PE=1 SV=3 -<br>[RL36_HUMAN]                      | 45.71 | 1 | 7  | 8  | 88 | 0.700 | 0.912 | 0.947 | 0.925 | 154.58 | 45.71 | 14 | 88 | 105 | 12.2  | 11.59 |
| P00973 | 2'-5'-<br>oligoadenylate<br>synthase 1<br>OS=Homo<br>sapiens<br>GN=OAS1<br>PE=1 SV=4 -<br>[OAS1_HUMAN]             | 5.00  | 1 | 2  | 2  | 3  | 2.822 | 0.705 | 0.986 | 0.925 | 6.32   | 5.00  | 3  | 3  | 400 | 46.0  | 8.22  |
| Q9BRX2 | Protein pelota<br>homolog<br>OS=Homo<br>sapiens<br>GN=PELO<br>PE=1 SV=2 -<br>[PELO_HUMAN]                          | 31.95 | 2 | 10 | 11 | 31 | 0.868 | 0.918 | 1.218 | 0.925 | 63.26  | 31.95 | 17 | 31 | 385 | 43.3  | 6.34  |
| P49682 | C-X-C<br>chemokine<br>receptor type<br>3 OS=Homo<br>sapiens<br>GN=CXCR3<br>PE=1 SV=2 -<br>[CXCR3_HUMAN<br>]        | 3.26  | 1 | 1  | 1  | 1  | 0.754 | 0.468 | 0.449 | 0.925 | 1.99   | 3.26  | 1  | 1  | 368 | 40.6  | 7.74  |
| Q86U42 | Polyadenylate-<br>binding protein<br>2 OS=Homo<br>sapiens<br>GN=PABPN1<br>PE=1 SV=3 -<br>[PABP2_HUMAN<br>]         | 16.99 | 2 | 8  | 8  | 27 | 0.865 | 1.088 | 0.724 | 0.926 | 50.42  | 16.99 | 13 | 27 | 306 | 32.7  | 5.06  |
| Q9BUK6 | Protein misato<br>homolog 1<br>OS=Homo<br>sapiens<br>GN=MSTO1<br>PE=1 SV=1 -<br>[MSTO1_HUMA<br>N]                  | 8.42  | 1 | 3  | 3  | 9  | 0.934 | 1.229 | 1.135 | 0.926 | 18.61  | 8.42  | 5  | 9  | 570 | 61.8  | 6.11  |
| O94967 | WD repeat-<br>containing<br>protein 47<br>OS=Homo<br>sapiens<br>GN=WDR47<br>PE=1 SV=1 -<br>[WDR47_HUMA<br>N]       | 5.55  | 1 | 5  | 5  | 16 | 1.378 | 0.769 | 1.245 | 0.926 | 41.43  | 5.55  | 8  | 16 | 919 | 101.9 | 5.94  |
| Q8IZ13 | Protein ZBED8<br>OS=Homo<br>sapiens<br>GN=ZBED8<br>PE=2 SV=1 -<br>[ZBED8_HUMAN<br>]                                | 3.70  | 1 | 1  | 1  | 1  | 1.311 | 0.819 | 0.926 | 0.926 | 0.00   | 3.70  | 1  | 1  | 594 | 68.3  | 6.42  |

|        |                                                                                               |       |   |    |    |     |       |       |       |       |         |       |    |     |      |       |       |
|--------|-----------------------------------------------------------------------------------------------|-------|---|----|----|-----|-------|-------|-------|-------|---------|-------|----|-----|------|-------|-------|
| P36405 | ADP-ribosylation factor-like protein 3<br>OS=Homo sapiens<br>GN=ARL3 PE=1 SV=2 - [ARL3_HUMAN] | 58.24 | 1 | 9  | 9  | 25  | 0.971 | 1.137 | 1.083 | 0.926 | 69.49   | 58.24 | 13 | 25  | 182  | 20.4  | 7.24  |
| P78509 | Reelin<br>OS=Homo sapiens<br>GN=RELN PE=1 SV=3 - [RELN_HUMAN]                                 | 0.35  | 1 | 1  | 1  | 1   | 1.351 | 1.056 | 0.986 | 0.926 | 0.00    | 0.35  | 1  | 1   | 3460 | 388.1 | 5.88  |
| P21266 | Glutathione S-transferase Mu 3<br>OS=Homo sapiens<br>GN=GSTM3 PE=1 SV=3 - [GSTM3_HUMAN]       | 81.78 | 1 | 23 | 24 | 356 | 1.444 | 0.547 | 0.713 | 0.926 | 950.83  | 81.78 | 44 | 356 | 225  | 26.5  | 5.54  |
| Q92499 | ATP-dependent RNA helicase DDX1<br>OS=Homo sapiens<br>GN=DDX1 PE=1 SV=2 - [DDX1_HUMAN]        | 47.30 | 1 | 33 | 33 | 113 | 0.947 | 1.040 | 1.139 | 0.926 | 256.91  | 47.30 | 50 | 113 | 740  | 82.4  | 7.23  |
| P62244 | 40S ribosomal protein S15a<br>OS=Homo sapiens<br>GN=RPS15A PE=1 SV=2 - [RPS15A_HUMAN]         | 59.23 | 1 | 8  | 8  | 83  | 0.883 | 1.029 | 0.922 | 0.926 | 148.68  | 59.23 | 15 | 83  | 130  | 14.8  | 10.13 |
| P30043 | Flavin reductase (NADPH)<br>OS=Homo sapiens<br>GN=BLVRB PE=1 SV=3 - [BLVRB_HUMAN]             | 59.71 | 1 | 8  | 8  | 61  | 1.232 | 1.018 | 1.161 | 0.926 | 186.84  | 59.71 | 15 | 61  | 206  | 22.1  | 7.65  |
| Q9NZM4 | EH domain-containing protein 2<br>OS=Homo sapiens<br>GN=EHD2 PE=1 SV=2 - [EHD2_HUMAN]         | 68.14 | 1 | 30 | 36 | 397 | 2.035 | 1.079 | 1.337 | 0.926 | 1084.61 | 68.14 | 59 | 397 | 543  | 61.1  | 6.46  |
| Q81Y16 | Exocyst complex component 8<br>OS=Homo sapiens<br>GN=EXOC8 PE=1 SV=2 - [EXOC8_HUMAN]          | 13.52 | 1 | 11 | 11 | 21  | 1.000 | 1.107 | 0.915 | 0.926 | 36.67   | 13.52 | 17 | 21  | 725  | 81.7  | 5.49  |
| Q16760 | Diaclycerol kinase delta<br>OS=Homo sapiens<br>GN=DGKD PE=1 SV=4 - [DGKD_HUMAN]               | 2.22  | 2 | 2  | 3  | 3   | 1.386 | 1.616 | 1.200 | 0.927 | 2.38    | 2.22  | 3  | 3   | 1214 | 134.4 | 7.56  |

|        |                                                                                                         |       |   |    |    |    |       |       |       |       |        |       |    |    |      |       |      |
|--------|---------------------------------------------------------------------------------------------------------|-------|---|----|----|----|-------|-------|-------|-------|--------|-------|----|----|------|-------|------|
| P42025 | Beta-centractin<br>OS=Homo sapiens<br>GN=ACTR1B<br>PE=1 SV=1 - [ACTY_HUMAN]                             | 26.06 | 2 | 3  | 8  | 59 | 1.239 | 0.970 | 0.952 | 0.927 | 131.64 | 26.06 | 14 | 59 | 376  | 42.3  | 6.40 |
| Q9H759 | Zinc finger protein 703<br>OS=Homo sapiens<br>GN=ZNF703<br>PE=1 SV=1 - [ZNF703_HUMAN]                   | 4.24  | 2 | 2  | 2  | 8  | 1.511 | 1.207 | 1.013 | 0.927 | 20.74  | 4.24  | 4  | 8  | 590  | 58.2  | 8.79 |
| P51648 | Fatty aldehyde dehydrogenase<br>OS=Homo sapiens<br>GN=ALDH3A2<br>PE=1 SV=1 - [AL3A2_HUMAN]              | 15.88 | 1 | 7  | 7  | 37 | 1.116 | 1.028 | 0.758 | 0.927 | 87.18  | 15.88 | 11 | 37 | 485  | 54.8  | 7.88 |
| Q8N4J0 | UPF0586 protein C9orf41<br>OS=Homo sapiens<br>GN=C9orf41<br>PE=1 SV=1 - [C1041_HUMAN]                   | 1.71  | 1 | 1  | 1  | 2  | 0.532 | 0.420 | 0.606 | 0.927 | 4.57   | 1.71  | 1  | 2  | 409  | 47.2  | 6.32 |
| Q969S9 | Ribosome-releasing factor 2, mitochondrial<br>OS=Homo sapiens<br>GN=GFM2<br>PE=1 SV=1 - [RRF2M_HUMA]    | 7.57  | 1 | 6  | 6  | 13 | 0.976 | 0.869 | 0.839 | 0.927 | 26.27  | 7.57  | 10 | 13 | 779  | 86.5  | 6.51 |
| Q6BDS2 | UHRF1-binding protein 1<br>OS=Homo sapiens<br>GN=UHRF1BP1<br>PE=1 SV=1 - [URFB1_HUMAN]                  | 5.56  | 1 | 5  | 8  | 12 | 1.208 | 0.704 | 1.055 | 0.927 | 15.10  | 5.56  | 10 | 12 | 1440 | 159.4 | 6.14 |
| P05186 | Alkaline phosphatase, tissue-nonspecific isozyme<br>OS=Homo sapiens<br>GN=ALPL PE=1 SV=4 - [PPBT_HUMAN] | 33.40 | 1 | 14 | 14 | 56 | 0.631 | 0.609 | 0.268 | 0.927 | 143.28 | 33.40 | 23 | 56 | 524  | 57.3  | 6.67 |
| Q9NZJ7 | Mitochondrial carrier homolog 1<br>OS=Homo sapiens<br>GN=MTCH1<br>PE=1 SV=1 - [MTCH1_HUMA]              | 15.94 | 1 | 4  | 4  | 13 | 1.050 | 0.552 | 0.600 | 0.927 | 31.06  | 15.94 | 6  | 13 | 389  | 41.5  | 9.32 |
| Q9NRS6 | Sorting nexin-15<br>OS=Homo sapiens<br>GN=SNX15<br>PE=1 SV=1 - [SNX15_HUMAN]                            | 14.33 | 1 | 4  | 4  | 14 | 1.385 | 1.378 | 1.765 | 0.927 | 36.54  | 14.33 | 6  | 14 | 342  | 38.3  | 5.19 |

|        |                                                                                                                                    |       |   |    |    |     |       |       |       |       |        |       |    |     |      |       |      |
|--------|------------------------------------------------------------------------------------------------------------------------------------|-------|---|----|----|-----|-------|-------|-------|-------|--------|-------|----|-----|------|-------|------|
| Q14511 | Enhancer of filamentation 1<br>OS=Homo sapiens<br>GN=NEDD9<br>PE=1 SV=1 - [CASL_HUMAN]                                             | 0.72  | 1 | 1  | 1  | 1   | 1.033 | 0.857 | 0.861 | 0.927 | 2.28   | 0.72  | 1  | 1   | 834  | 92.8  | 6.70 |
| P61599 | N-alpha-acetyltransferase 20<br>OS=Homo sapiens<br>GN=NAA20<br>PE=1 SV=1 - [NAA20_HUMAN]                                           | 14.61 | 1 | 2  | 2  | 6   | 0.774 | 0.802 | 0.938 | 0.927 | 10.75  | 14.61 | 4  | 6   | 178  | 20.4  | 5.03 |
| P48147 | Prolyl endopeptidase<br>OS=Homo sapiens<br>GN=PREP<br>PE=1 SV=2 - [PPCE_HUMAN]                                                     | 30.00 | 1 | 21 | 21 | 87  | 1.188 | 0.788 | 0.944 | 0.928 | 209.80 | 30.00 | 35 | 87  | 710  | 80.6  | 5.86 |
| P28161 | Glutathione S-transferase Mu 2<br>OS=Homo sapiens<br>GN=GSTM2<br>PE=1 SV=2 - [GSTM2_HUMAN]                                         | 66.97 | 1 | 6  | 16 | 164 | 0.844 | 0.730 | 0.988 | 0.928 | 421.62 | 66.97 | 26 | 164 | 218  | 25.7  | 6.37 |
| P01891 | HLA class I histocompatibility antigen, A-68 alpha chain<br>OS=Homo sapiens<br>GN=HLA-A<br>PE=1 SV=4 - [1A68_HUMAN]                | 51.78 | 2 | 5  | 21 | 143 | 0.951 | 1.071 | 0.948 | 0.928 | 350.48 | 51.78 | 31 | 143 | 365  | 40.9  | 6.70 |
| Q14324 | Myosin-binding protein C, fast-type<br>OS=Homo sapiens<br>GN=MYBPC2<br>PE=1 SV=2 - [MYPC2_HUMAN]                                   | 0.70  | 1 | 1  | 1  | 18  | 1.384 | 0.815 | 0.911 | 0.928 | 42.20  | 0.70  | 1  | 18  | 1141 | 128.0 | 7.52 |
| Q9P206 | Uncharacterized protein KIAA1522<br>OS=Homo sapiens<br>GN=KIAA1522<br>PE=1 SV=2 - [K1522_HUMAN]                                    | 5.70  | 1 | 5  | 5  | 13  | 1.048 | 1.957 | 1.608 | 0.928 | 36.07  | 5.70  | 8  | 13  | 1035 | 107.0 | 9.73 |
| Q8N4C8 | Mishapen-like kinase 1<br>OS=Homo sapiens<br>GN=MINK1<br>PE=1 SV=2 - [MINK1_HUMAN]                                                 | 11.49 | 1 | 8  | 14 | 29  | 1.212 | 1.032 | 1.109 | 0.928 | 71.25  | 11.49 | 23 | 29  | 1332 | 149.7 | 7.85 |
| Q8TDY4 | Arf-GAP with SH3 domain, ANK repeat and PH domain-containing protein 3<br>OS=Homo sapiens<br>GN=ASAP3<br>PE=1 SV=1 - [ASAP3_HUMAN] | 6.09  | 1 | 4  | 4  | 7   | 0.957 | 1.195 | 0.910 | 0.928 | 22.14  | 6.09  | 6  | 7   | 903  | 99.1  | 6.40 |

|        |                                                                                                                        |       |   |    |    |     |       |       |       |       |        |       |    |     |     |       |      |
|--------|------------------------------------------------------------------------------------------------------------------------|-------|---|----|----|-----|-------|-------|-------|-------|--------|-------|----|-----|-----|-------|------|
| Q13409 | Cytoplasmic dynein 1 intermediate chain 2<br>OS=Homo sapiens<br>GN=DYNC112<br>PE=1 SV=3 - [DC112_HUMAN]                | 25.71 | 2 | 15 | 15 | 123 | 1.102 | 1.092 | 1.032 | 0.928 | 283.41 | 25.71 | 27 | 123 | 638 | 71.4  | 5.20 |
| P13929 | Beta-enolase<br>OS=Homo sapiens<br>GN=ENO3<br>PE=1 SV=5 - [ENOB_HUMAN]                                                 | 25.35 | 1 | 2  | 10 | 302 | 0.991 | 0.861 | 0.932 | 0.928 | 641.99 | 25.35 | 13 | 302 | 434 | 47.0  | 7.71 |
| Q32P41 | tRNA (guanine(37)-N1)-methyltransferase<br>OS=Homo sapiens<br>GN=TRMT5<br>PE=1 SV=2 - [TRM5_HUMAN]                     | 3.93  | 1 | 2  | 2  | 4   | 0.855 | 1.337 | 0.896 | 0.928 | 8.48   | 3.93  | 2  | 4   | 509 | 58.2  | 8.62 |
| Q9BSJ2 | Gamma-tubulin complex component 2<br>OS=Homo sapiens<br>GN=TUBGCP2<br>PE=1 SV=2 - [GCP2_HUMAN]                         | 10.09 | 1 | 8  | 8  | 14  | 0.950 | 0.867 | 0.868 | 0.928 | 38.44  | 10.09 | 12 | 14  | 902 | 102.5 | 6.84 |
| P42892 | Endothelin-converting enzyme 1<br>OS=Homo sapiens<br>GN=ECE1<br>PE=1 SV=2 - [ECE1_HUMAN]                               | 22.73 | 1 | 20 | 20 | 79  | 1.361 | 0.782 | 0.828 | 0.928 | 199.70 | 22.73 | 31 | 79  | 770 | 87.1  | 5.88 |
| P40227 | T-complex protein 1 subunit zeta<br>OS=Homo sapiens<br>GN=CCT6A<br>PE=1 SV=3 - [TCPZ_HUMAN]                            | 54.43 | 2 | 32 | 32 | 173 | 0.951 | 0.949 | 0.912 | 0.928 | 362.09 | 54.43 | 48 | 173 | 531 | 58.0  | 6.68 |
| Q13131 | 5'-AMP-activated protein kinase catalytic subunit alpha-1<br>OS=Homo sapiens<br>GN=PRKAA1<br>PE=1 SV=4 - [AAPK1_HUMAN] | 19.50 | 2 | 10 | 10 | 28  | 1.032 | 0.943 | 1.084 | 0.928 | 77.06  | 19.50 | 13 | 28  | 559 | 64.0  | 8.12 |
| P35606 | Coatmer subunit beta'<br>OS=Homo sapiens<br>GN=COPB2<br>PE=1 SV=2 - [COPB2_HUMAN]                                      | 39.51 | 1 | 34 | 34 | 242 | 0.930 | 0.916 | 0.950 | 0.929 | 592.02 | 39.51 | 57 | 242 | 906 | 102.4 | 5.27 |
| P14649 | Myosin light chain 6B<br>OS=Homo sapiens<br>GN=MYL6B<br>PE=1 SV=1 - [MYL6B_HUMAN]                                      | 38.94 | 1 | 5  | 9  | 262 | 1.048 | 1.092 | 1.148 | 0.929 | 606.14 | 38.94 | 14 | 262 | 208 | 22.7  | 5.73 |

|        |                                                                                                                        |       |   |    |    |     |       |       |       |       |        |       |    |     |      |       |      |
|--------|------------------------------------------------------------------------------------------------------------------------|-------|---|----|----|-----|-------|-------|-------|-------|--------|-------|----|-----|------|-------|------|
| Q92990 | Glomulin<br>OS=Homo sapiens<br>GN=GLMN<br>PE=1 SV=2 - [GLMN_HUMAN]                                                     | 4.38  | 1 | 3  | 3  | 9   | 0.695 | 0.796 | 0.897 | 0.929 | 13.99  | 4.38  | 5  | 9   | 594  | 68.2  | 5.33 |
| Q9Y3X0 | Coiled-coil domain-containing protein 9<br>OS=Homo sapiens<br>GN=CCDC9<br>PE=1 SV=1 - [CCDC9_HUMAN]                    | 11.68 | 1 | 5  | 5  | 22  | 1.342 | 1.125 | 1.202 | 0.929 | 42.62  | 11.68 | 7  | 22  | 531  | 59.7  | 5.40 |
| Q9NYH9 | U3 small nucleolar RNA-associated protein 6 homolog<br>OS=Homo sapiens<br>GN=UTP6<br>PE=1 SV=2 - [UTP6_HUMAN]          | 9.05  | 1 | 5  | 5  | 11  | 0.684 | 0.774 | 0.810 | 0.929 | 22.00  | 9.05  | 7  | 11  | 597  | 70.1  | 7.28 |
| O95163 | Elongator complex protein 1<br>OS=Homo sapiens<br>GN=IKBKAP<br>PE=1 SV=3 - [ELP1_HUMAN]                                | 8.78  | 1 | 8  | 8  | 12  | 0.788 | 0.795 | 0.795 | 0.929 | 22.56  | 8.78  | 11 | 12  | 1332 | 150.2 | 5.94 |
| P62195 | 26S protease regulatory subunit 8<br>OS=Homo sapiens<br>GN=PSMC5<br>PE=1 SV=1 - [PRS8_HUMAN]                           | 65.76 | 1 | 25 | 27 | 110 | 1.002 | 0.997 | 1.017 | 0.929 | 257.13 | 65.76 | 42 | 110 | 406  | 45.6  | 7.55 |
| P42704 | Leucine-rich PPR motif-containing protein, mitochondrial<br>OS=Homo sapiens<br>GN=LRPPRC<br>PE=1 SV=3 - [LRPPRC_HUMAN] | 35.22 | 1 | 48 | 48 | 147 | 0.774 | 1.029 | 0.966 | 0.929 | 364.82 | 35.22 | 75 | 147 | 1394 | 157.8 | 6.13 |
| Q9Y4F5 | Centrosomal protein of 170 kDa protein B<br>OS=Homo sapiens<br>GN=CEP170B<br>PE=1 SV=4 - [C170B_HUMAN]                 | 9.31  | 1 | 10 | 12 | 26  | 1.089 | 1.271 | 1.320 | 0.929 | 64.38  | 9.31  | 17 | 26  | 1589 | 171.6 | 6.84 |
| Q9BRK0 | Receptor expression-enhancing protein 2<br>OS=Homo sapiens<br>GN=REEP2<br>PE=1 SV=2 - [REEP2_HUMAN]                    | 13.10 | 1 | 2  | 2  | 2   | 2.806 | 1.194 | 2.489 | 0.929 | 7.57   | 13.10 | 2  | 2   | 252  | 28.2  | 9.54 |

|        |                                                                                                                 |       |   |    |    |     |       |       |       |       |         |       |    |     |      |       |      |
|--------|-----------------------------------------------------------------------------------------------------------------|-------|---|----|----|-----|-------|-------|-------|-------|---------|-------|----|-----|------|-------|------|
| Q9BXB4 | Oxysterol-binding protein-related protein 11 OS=Homo sapiens<br>GN=OSBP11<br>PE=1 SV=2 - [OSB11_HUMAN]          | 6.16  | 1 | 3  | 4  | 7   | 0.855 | 0.840 | 0.986 | 0.930 | 14.12   | 6.16  | 6  | 7   | 747  | 83.6  | 7.06 |
| O00232 | 26S proteasome non-ATPase regulatory subunit 12 OS=Homo sapiens<br>GN=PSMD12<br>PE=1 SV=3 - [PSD12_HUMAN]       | 50.00 | 1 | 21 | 22 | 79  | 0.910 | 0.861 | 0.922 | 0.930 | 211.85  | 50.00 | 35 | 79  | 456  | 52.9  | 7.65 |
| Q9UFG5 | UPF0449 protein C19orf25 OS=Homo sapiens<br>GN=C19orf25<br>PE=1 SV=2 - [CS025_HUMAN]                            | 38.98 | 1 | 3  | 3  | 12  | 0.798 | 1.181 | 1.014 | 0.930 | 33.38   | 38.98 | 6  | 12  | 118  | 12.9  | 5.07 |
| Q96AY4 | Tetratricopeptide repeat protein 28 OS=Homo sapiens<br>GN=TTC28<br>PE=1 SV=4 - [TTC28_HUMAN]                    | 8.18  | 1 | 16 | 17 | 42  | 1.284 | 0.906 | 0.862 | 0.930 | 89.14   | 8.18  | 24 | 42  | 2481 | 270.7 | 6.89 |
| Q9Y4A5 | Transformation/transcription domain-associated protein OS=Homo sapiens<br>GN=TRRAP<br>PE=1 SV=3 - [TRRAP_HUMAN] | 1.79  | 1 | 4  | 5  | 7   | 1.254 | 1.372 | 1.421 | 0.930 | 15.31   | 1.79  | 6  | 7   | 3859 | 437.3 | 8.19 |
| P27797 | Calreticulin OS=Homo sapiens<br>GN=CALR PE=1 SV=1 - [CALR_HUMAN]                                                | 75.78 | 1 | 28 | 28 | 678 | 0.732 | 1.013 | 0.920 | 0.930 | 1734.33 | 75.78 | 44 | 678 | 417  | 48.1  | 4.44 |
| Q9C0B1 | Alpha-ketoglutarate-dependent dioxygenase FTO OS=Homo sapiens<br>GN=FTO PE=1 SV=3 - [FTO_HUMAN]                 | 22.38 | 1 | 10 | 10 | 19  | 0.860 | 1.008 | 0.972 | 0.930 | 40.59   | 22.38 | 15 | 19  | 505  | 58.2  | 5.22 |
| Q2NKX8 | DNA excision repair protein ERCC-6-like OS=Homo sapiens<br>GN=ERCC6L<br>PE=1 SV=1 - [ERC6L_HUMAN]               | 2.88  | 1 | 4  | 4  | 7   | 1.200 | 0.893 | 0.726 | 0.930 | 8.30    | 2.88  | 5  | 7   | 1250 | 141.0 | 5.31 |



|        |                                                                                                                     |       |   |    |    |     |       |       |       |       |        |       |    |     |      |       |      |
|--------|---------------------------------------------------------------------------------------------------------------------|-------|---|----|----|-----|-------|-------|-------|-------|--------|-------|----|-----|------|-------|------|
| Q53GQ0 | Estradiol 17-beta-dehydrogenase 12 OS=Homo sapiens<br>GN=HSD17B12<br>PE=1 SV=2 - [DHBI2_HUMAN]                      | 23.08 | 1 | 6  | 6  | 21  | 0.834 | 0.518 | 0.641 | 0.930 | 54.40  | 23.08 | 11 | 21  | 312  | 34.3  | 9.32 |
| O75223 | Gamma-glutamyltransferase OS=Homo sapiens<br>GN=GGCT<br>PE=1 SV=1 - [GGCT_HUMAN]                                    | 21.81 | 1 | 4  | 4  | 27  | 0.716 | 0.922 | 0.653 | 0.930 | 62.08  | 21.81 | 6  | 27  | 188  | 21.0  | 5.14 |
| Q8N653 | Leucine-zipper-like transcriptional regulator 1 OS=Homo sapiens<br>GN=LZTR1<br>PE=1 SV=2 - [LZTR1_HUMAN]            | 1.79  | 1 | 2  | 2  | 2   | 1.182 | 0.698 | 1.103 | 0.930 | 5.07   | 1.79  | 2  | 2   | 840  | 94.7  | 6.57 |
| O60706 | ATP-binding cassette sub-family C member 9 OS=Homo sapiens<br>GN=ABCC9<br>PE=1 SV=2 - [ABCC9_HUMAN]                 | 1.87  | 2 | 2  | 4  | 15  | 3.565 | 1.179 | 1.083 | 0.930 | 28.84  | 1.87  | 5  | 15  | 1549 | 174.1 | 7.37 |
| O15320 | cTAGE family member 5 OS=Homo sapiens<br>GN=CTAGE5<br>PE=1 SV=4 - [CTGES_HUMAN]                                     | 10.95 | 2 | 5  | 9  | 30  | 0.727 | 0.960 | 0.647 | 0.931 | 63.20  | 10.95 | 11 | 30  | 804  | 90.9  | 5.22 |
| Q14165 | Malectin OS=Homo sapiens<br>GN=MLEC<br>PE=1 SV=1 - [MLEC_HUMAN]                                                     | 31.51 | 1 | 9  | 9  | 44  | 0.690 | 0.803 | 0.650 | 0.931 | 105.56 | 31.51 | 16 | 44  | 292  | 32.2  | 5.41 |
| Q9HBM7 | Thioredoxin-interacting protein OS=Homo sapiens<br>GN=TXNIP<br>PE=1 SV=1 - [TXNIP_HUMAN]                            | 7.42  | 1 | 2  | 2  | 5   | 2.785 | 1.088 | 0.873 | 0.931 | 14.59  | 7.42  | 4  | 5   | 391  | 43.6  | 7.50 |
| Q0ZGT2 | Nexilin OS=Homo sapiens<br>GN=NEXN<br>PE=1 SV=1 - [NEXN_HUMAN]                                                      | 49.48 | 2 | 47 | 48 | 299 | 0.942 | 1.073 | 1.153 | 0.931 | 729.19 | 49.48 | 70 | 299 | 675  | 80.6  | 5.33 |
| P78324 | Tyrosine-protein phosphatase non-receptor type substrate 1 OS=Homo sapiens<br>GN=SIRPA<br>PE=1 SV=2 - [SHPS1_HUMAN] | 23.21 | 4 | 9  | 9  | 34  | 1.569 | 0.533 | 0.571 | 0.931 | 89.59  | 23.21 | 16 | 34  | 504  | 54.9  | 6.98 |

|        |                                                                                                              |       |   |    |    |     |       |       |       |       |         |       |    |     |      |       |       |
|--------|--------------------------------------------------------------------------------------------------------------|-------|---|----|----|-----|-------|-------|-------|-------|---------|-------|----|-----|------|-------|-------|
| Q8N7U6 | EF-hand domain-containing family member<br>B OS=Homo sapiens<br>GN=EFHB<br>PE=2 SV=4 - [EFHB_HUMAN]          | 1.80  | 1 | 1  | 1  | 2   | 3.826 | 1.243 | 1.404 | 0.931 | 0.00    | 1.80  | 1  | 2   | 833  | 93.7  | 7.58  |
| Q5ZPR3 | CD276 antigen<br>OS=Homo sapiens<br>GN=CD276<br>PE=1 SV=1 - [CD276_HUMAN]                                    | 17.98 | 1 | 4  | 4  | 24  | 0.863 | 0.792 | 0.863 | 0.931 | 50.54   | 17.98 | 7  | 24  | 534  | 57.2  | 4.91  |
| Q9BU02 | Thiamine-triphosphatase<br>OS=Homo sapiens<br>GN=THTPA<br>PE=1 SV=3 - [THTPA_HUMAN]                          | 29.13 | 1 | 5  | 5  | 9   | 0.976 | 1.396 | 1.769 | 0.931 | 23.47   | 29.13 | 8  | 9   | 230  | 25.6  | 4.82  |
| P20648 | Potassium-transporting ATPase alpha chain 1<br>OS=Homo sapiens<br>GN=ATP4A<br>PE=2 SV=5 - [ATP4A_HUMAN]      | 6.18  | 1 | 2  | 6  | 60  | 1.057 | 0.699 | 1.109 | 0.931 | 187.00  | 6.18  | 9  | 60  | 1035 | 114.0 | 5.81  |
| P50990 | T-complex protein 1 subunit theta<br>OS=Homo sapiens<br>GN=CCT8<br>PE=1 SV=4 - [TCPQ_HUMAN]                  | 66.06 | 1 | 36 | 36 | 311 | 0.872 | 0.956 | 0.897 | 0.931 | 738.14  | 66.06 | 62 | 311 | 548  | 59.6  | 5.60  |
| P46778 | 60S ribosomal protein L21<br>OS=Homo sapiens<br>GN=RPL21<br>PE=1 SV=2 - [RL21_HUMAN]                         | 38.13 | 1 | 8  | 8  | 34  | 0.835 | 0.953 | 0.817 | 0.931 | 52.07   | 38.13 | 12 | 34  | 160  | 18.6  | 10.49 |
| P62937 | Peptidyl-prolyl isomerase A<br>OS=Homo sapiens<br>GN=PPIA PE=1 SV=2 - [PPIA_HUMAN]                           | 83.64 | 4 | 15 | 16 | 953 | 1.055 | 1.030 | 1.047 | 0.932 | 2355.85 | 83.64 | 26 | 953 | 165  | 18.0  | 7.81  |
| P30520 | Adenylosuccinate synthetase isozyme 2<br>OS=Homo sapiens<br>GN=ADSS<br>PE=1 SV=3 - [PURA2_HUMAN]             | 42.54 | 1 | 18 | 19 | 113 | 1.070 | 0.730 | 1.010 | 0.932 | 286.62  | 42.54 | 28 | 113 | 456  | 50.1  | 6.55  |
| P43034 | Platelet-activating factor acetylhydrolase IB subunit alpha<br>OS=Homo sapiens<br>GN=PAFAH1B1<br>PE=1 SV=2 - | 33.66 | 1 | 14 | 15 | 70  | 1.277 | 0.986 | 1.124 | 0.932 | 172.09  | 33.66 | 25 | 70  | 410  | 46.6  | 7.37  |

|        |                                                                                                                                        |       |   |   |   |    |       |       |       |       |       |       |    |    |      |       |      |  |
|--------|----------------------------------------------------------------------------------------------------------------------------------------|-------|---|---|---|----|-------|-------|-------|-------|-------|-------|----|----|------|-------|------|--|
|        | Cytosolic Fe-S<br>cluster<br>assembly factor<br>NUBP2                                                                                  |       |   |   |   |    |       |       |       |       |       |       |    |    |      |       |      |  |
| Q9Y5Y2 | OS=Homo<br>sapiens<br>GN=NUBP2<br>PE=1 SV=1 -<br>[NUBP2_HUMAN<br>Dehydrodolichyl<br>diphosphate<br>syntase<br>complex<br>subunit DHDDS | 8.86  | 1 | 2 | 2 | 3  | 0.921 | 0.728 | 0.927 | 0.932 | 6.94  | 8.86  | 3  | 3  | 271  | 28.8  | 5.83 |  |
| Q86SQ9 | OS=Homo<br>sapiens<br>GN=DHDDS<br>PE=1 SV=3 -<br>[DHDDS_HUMAN<br>)<br>Tensin-like C1<br>domain-<br>containing<br>phosphatase           | 5.41  | 1 | 1 | 2 | 3  | 1.062 | 0.669 | 1.279 | 0.932 | 6.13  | 5.41  | 2  | 3  | 333  | 38.6  | 8.28 |  |
| Q63HR2 | OS=Homo<br>sapiens<br>GN=TENC1<br>PE=1 SV=2 -<br>[TENC1_HUMAN<br>)<br>Sphingosine-1-<br>phosphate<br>lyase 1                           | 6.32  | 1 | 5 | 7 | 26 | 1.030 | 1.231 | 0.971 | 0.932 | 54.81 | 6.32  | 11 | 26 | 1409 | 152.5 | 8.35 |  |
| O95470 | OS=Homo<br>sapiens<br>GN=SGPL1<br>PE=1 SV=3 -<br>[SGPL1_HUMAN<br>)<br>Conserved<br>oligomeric Golgi<br>complex<br>subunit 7            | 13.73 | 1 | 7 | 7 | 28 | 0.893 | 1.149 | 1.012 | 0.932 | 79.20 | 13.73 | 11 | 28 | 568  | 63.5  | 9.16 |  |
| P83436 | OS=Homo<br>sapiens<br>GN=COG7<br>PE=1 SV=1 -<br>[COG7_HUMAN<br>)<br>NudC domain-<br>containing<br>protein 1                            | 10.65 | 1 | 7 | 7 | 14 | 0.966 | 0.988 | 1.059 | 0.932 | 36.26 | 10.65 | 10 | 14 | 770  | 86.3  | 5.47 |  |
| Q96RS6 | OS=Homo<br>sapiens<br>GN=NUDCD1<br>PE=1 SV=2 -<br>[NUDC1_HUMAN<br>)<br>Dual<br>serine/threonin<br>e and tyrosine<br>protein kinase     | 8.92  | 1 | 4 | 6 | 16 | 0.988 | 0.717 | 0.775 | 0.932 | 37.20 | 8.92  | 9  | 16 | 583  | 66.7  | 5.11 |  |
| Q6XUX3 | OS=Homo<br>sapiens<br>GN=DSTYK<br>PE=1 SV=2 -<br>[DUSTY_HUMAN<br>)<br>Type I inositol<br>3,4-<br>bisphosphate 4-<br>phosphatase        | 1.51  | 1 | 1 | 2 | 5  | 0.714 | 0.309 | 0.653 | 0.932 | 5.94  | 1.51  | 3  | 5  | 929  | 105.1 | 6.74 |  |
| Q96PE3 | OS=Homo<br>sapiens<br>GN=INPP4A<br>PE=1 SV=1 -<br>[INP4A_HUMAN<br>)                                                                    | 4.81  | 1 | 4 | 4 | 17 | 1.095 | 1.293 | 1.806 | 0.932 | 35.44 | 4.81  | 5  | 17 | 977  | 109.9 | 6.96 |  |

|        |                                                                                                                     |       |   |    |    |     |       |       |       |       |        |       |    |     |      |       |      |
|--------|---------------------------------------------------------------------------------------------------------------------|-------|---|----|----|-----|-------|-------|-------|-------|--------|-------|----|-----|------|-------|------|
| P41208 | Centrin-2<br>OS=Homo sapiens<br>GN=CETN2<br>PE=1 SV=1 - [CETN2_HUMAN]                                               | 16.28 | 2 | 3  | 3  | 8   | 1.059 | 1.400 | 1.215 | 0.933 | 19.57  | 16.28 | 5  | 8   | 172  | 19.7  | 5.00 |
| Q27BE0 | CWF19-like protein 2<br>OS=Homo sapiens<br>GN=CWF19L2<br>PE=1 SV=4 - [C19L2_HUMAN]                                  | 2.80  | 1 | 2  | 3  | 3   | 0.757 | 1.020 | 0.755 | 0.933 | 5.56   | 2.80  | 3  | 3   | 894  | 103.7 | 8.65 |
| P37173 | TGF-beta receptor type-2<br>OS=Homo sapiens<br>GN=TGFR2<br>PE=1 SV=2 - [TGFR2_HUMAN]                                | 8.64  | 1 | 3  | 3  | 3   | 1.104 | 1.463 | 0.726 | 0.933 | 11.63  | 8.64  | 3  | 3   | 567  | 64.5  | 5.90 |
| Q86X83 | COMM domain-containing protein 2<br>OS=Homo sapiens<br>GN=COMMMD2<br>PE=1 SV=2 - [COMD2_HUMAN]                      | 12.56 | 1 | 3  | 3  | 12  | 0.925 | 0.955 | 1.009 | 0.933 | 15.27  | 12.56 | 6  | 12  | 199  | 22.7  | 6.73 |
| Q9NZC3 | Glycerophosphodiester phosphodiesterase 1<br>OS=Homo sapiens<br>GN=GDE1<br>PE=1 SV=1 - [GDE1_HUMAN]                 | 9.67  | 1 | 3  | 3  | 5   | 1.282 | 0.788 | 1.031 | 0.933 | 7.87   | 9.67  | 4  | 5   | 331  | 37.7  | 6.71 |
| Q9HZ99 | SH3 domain-binding glutamic acid-rich-like protein 3<br>OS=Homo sapiens<br>GN=SH3BGRL3<br>PE=1 SV=1 - [SH3L3_HUMAN] | 92.47 | 2 | 10 | 10 | 239 | 0.818 | 0.918 | 1.365 | 0.933 | 426.57 | 92.47 | 16 | 239 | 93   | 10.4  | 4.93 |
| Q7L099 | Protein RUFY3<br>OS=Homo sapiens<br>GN=RUFY3<br>PE=1 SV=1 - [RUFY3_HUMAN]                                           | 15.78 | 1 | 7  | 7  | 15  | 1.079 | 0.916 | 1.236 | 0.933 | 22.82  | 15.78 | 10 | 15  | 469  | 52.9  | 5.49 |
| P08842 | Steryl-sulfatase<br>OS=Homo sapiens<br>GN=STS PE=1 SV=2 - [STS_HUMAN]                                               | 6.86  | 1 | 4  | 4  | 6   | 1.619 | 1.000 | 0.598 | 0.933 | 16.00  | 6.86  | 6  | 6   | 583  | 65.5  | 7.66 |
| Q9HCM7 | Fibrosin-1-like protein<br>OS=Homo sapiens<br>GN=FBRS1<br>PE=1 SV=4 - [FBSL_HUMAN]                                  | 0.57  | 1 | 1  | 1  | 2   | 0.668 | 0.749 | 0.775 | 0.933 | 4.27   | 0.57  | 1  | 2   | 1045 | 110.8 | 9.67 |

|        |                                                                                                                                                                                                                                                 |       |   |    |    |     |       |       |       |       |        |       |    |     |      |       |      |
|--------|-------------------------------------------------------------------------------------------------------------------------------------------------------------------------------------------------------------------------------------------------|-------|---|----|----|-----|-------|-------|-------|-------|--------|-------|----|-----|------|-------|------|
| Q96GK7 | Fumarylacetoacetate<br>hydrolase<br>domain-<br>containing<br>protein 2A<br>OS=Homo<br>sapiens<br>GN=FAHD2A<br>PE=1 SV=1 -<br>[FAH2A_HUMAN<br>Gem-associated<br>protein 5<br>OS=Homo<br>sapiens<br>GN=GEMIN5<br>PE=1 SV=3 -<br>[GEMIS_HUMAN<br>] | 38.85 | 2 | 8  | 8  | 22  | 0.828 | 0.992 | 0.864 | 0.933 | 67.67  | 38.85 | 12 | 22  | 314  | 34.6  | 8.24 |
| Q8TEQ6 | Contactin-<br>associated<br>protein 1<br>OS=Homo<br>sapiens<br>GN=CNTNAP1<br>PE=1 SV=1 -<br>[CNTP1_HUMAN<br>]                                                                                                                                   | 5.84  | 1 | 8  | 8  | 15  | 0.806 | 0.605 | 0.606 | 0.933 | 34.32  | 5.84  | 11 | 15  | 1508 | 168.5 | 6.62 |
| P78357 | A disintegrin<br>and<br>metalloprotein<br>ase with<br>thrombospondin<br>motifs 17<br>OS=Homo<br>sapiens<br>GN=ADAMTS17<br>PE=2 SV=2 -<br>[ATS17_HUMAN<br>]                                                                                      | 11.63 | 1 | 15 | 15 | 50  | 1.243 | 1.862 | 1.263 | 0.933 | 113.63 | 11.63 | 25 | 50  | 1384 | 156.2 | 7.05 |
| Q8TE56 | ATP-<br>dependent<br>DNA helicase<br>Q1 OS=Homo<br>sapiens<br>GN=RECQL<br>PE=1 SV=3 -<br>[RECQ1_HUMA<br>]                                                                                                                                       | 2.56  | 1 | 2  | 2  | 2   | 1.321 | 1.090 | 1.016 | 0.933 | 4.89   | 2.56  | 2  | 2   | 1095 | 121.0 | 8.06 |
| P46063 | Rab GDP<br>dissodation<br>inhibitor beta<br>OS=Homo<br>sapiens<br>GN=GDI2 PE=1<br>SV=2 -<br>[GDI2_HUMAN<br>]                                                                                                                                    | 28.81 | 1 | 17 | 18 | 64  | 1.049 | 1.050 | 0.949 | 0.933 | 149.61 | 28.81 | 26 | 64  | 649  | 73.4  | 7.88 |
| P50395 | Renin receptor<br>OS=Homo<br>sapiens<br>GN=ATP6AP2<br>PE=1 SV=2 -<br>[REN2_HUMAN<br>]                                                                                                                                                           | 64.94 | 2 | 24 | 31 | 253 | 1.007 | 0.976 | 0.982 | 0.933 | 579.16 | 64.94 | 49 | 253 | 445  | 50.6  | 6.47 |
| O75787 | Lymphocyte<br>activation gene<br>3 protein<br>OS=Homo<br>sapiens<br>GN=LAG3 PE=1<br>SV=5 -<br>[LAG3_HUMAN<br>]                                                                                                                                  | 16.00 | 1 | 5  | 5  | 11  | 0.831 | 0.771 | 0.940 | 0.934 | 25.56  | 16.00 | 7  | 11  | 350  | 39.0  | 6.10 |
| P18627 | Membrane<br>cofactor<br>protein<br>OS=Homo<br>sapiens<br>GN=CD46<br>PE=1 SV=3 -<br>[MCP_HUMAN<br>]                                                                                                                                              | 3.24  | 1 | 1  | 1  | 1   | 0.938 | 0.974 | 1.331 | 0.934 | 2.38   | 3.24  | 1  | 1   | 525  | 57.4  | 7.97 |
| P15529 |                                                                                                                                                                                                                                                 | 6.63  | 1 | 4  | 4  | 15  | 1.108 | 0.755 | 1.053 | 0.934 | 24.50  | 6.63  | 6  | 15  | 392  | 43.7  | 6.74 |

|        |                                                                                                       |       |   |    |    |     |       |       |       |       |        |       |    |     |      |       |      |
|--------|-------------------------------------------------------------------------------------------------------|-------|---|----|----|-----|-------|-------|-------|-------|--------|-------|----|-----|------|-------|------|
| P49840 | Glycogen synthase kinase-3 alpha<br>OS=Homo sapiens<br>GN=GSK3A<br>PE=1 SV=2 - [GSK3A_HUMAN]          | 23.19 | 1 | 4  | 8  | 31  | 0.986 | 0.980 | 0.744 | 0.934 | 62.09  | 23.19 | 13 | 31  | 483  | 50.9  | 8.75 |
| Q93075 | Putative deoxyribonuclease TATDN2<br>OS=Homo sapiens<br>GN=TATDN2<br>PE=2 SV=2 - [TATDN2_HUMAN]       | 1.31  | 1 | 1  | 1  | 2   | 0.794 | 0.610 | 1.447 | 0.934 | 4.93   | 1.31  | 1  | 2   | 761  | 85.0  | 7.39 |
| P35052 | Glypican-1<br>OS=Homo sapiens<br>GN=GPC1<br>PE=1 SV=2 - [GPC1_HUMAN]                                  | 6.09  | 1 | 4  | 4  | 10  | 0.518 | 0.455 | 0.909 | 0.934 | 24.39  | 6.09  | 6  | 10  | 558  | 61.6  | 7.30 |
| Q02218 | 2-oxoglutarate dehydrogenase, mitochondrial<br>OS=Homo sapiens<br>GN=OGDH<br>PE=1 SV=3 - [ODO1_HUMAN] | 25.12 | 2 | 23 | 23 | 88  | 1.164 | 1.288 | 1.303 | 0.934 | 215.80 | 25.12 | 38 | 88  | 1023 | 115.9 | 6.86 |
| O43896 | Kinesin-like protein KIF1C<br>OS=Homo sapiens<br>GN=KIF1C<br>PE=1 SV=3 - [KIF1C_HUMAN]                | 20.94 | 3 | 12 | 19 | 49  | 1.031 | 1.175 | 1.118 | 0.934 | 119.62 | 20.94 | 27 | 49  | 1103 | 122.9 | 6.90 |
| Q9Y4L1 | Hypoxia up-regulated protein 1<br>OS=Homo sapiens<br>GN=HYOU1<br>PE=1 SV=1 - [HYOU1_HUMAN]            | 43.14 | 1 | 43 | 44 | 234 | 0.841 | 1.012 | 0.861 | 0.934 | 600.66 | 43.14 | 73 | 234 | 999  | 111.3 | 5.22 |
| Q9UNS1 | Protein timeless homolog<br>OS=Homo sapiens<br>GN=TIMELESS<br>PE=1 SV=2 - [TIM_HUMAN]                 | 1.16  | 1 | 1  | 1  | 1   | 1.180 | 1.323 | 1.013 | 0.934 | 2.73   | 1.16  | 1  | 1   | 1208 | 138.6 | 5.40 |
| O75347 | Tubulin-specific chaperone A<br>OS=Homo sapiens<br>GN=TBCA<br>PE=1 SV=3 - [TBCA_HUMAN]                | 66.67 | 1 | 11 | 11 | 103 | 0.853 | 1.000 | 1.052 | 0.934 | 248.46 | 66.67 | 21 | 103 | 108  | 12.8  | 5.29 |
| Q9Y5K6 | CD2-associated protein<br>OS=Homo sapiens<br>GN=CD2AP<br>PE=1 SV=1 - [CD2AP_HUMAN]                    | 37.25 | 1 | 22 | 23 | 58  | 0.950 | 1.002 | 1.307 | 0.934 | 146.21 | 37.25 | 34 | 58  | 639  | 71.4  | 6.40 |

|        |                                                                                                                           |       |   |    |    |    |       |       |       |       |        |       |    |    |      |       |      |
|--------|---------------------------------------------------------------------------------------------------------------------------|-------|---|----|----|----|-------|-------|-------|-------|--------|-------|----|----|------|-------|------|
| P40197 | Platelet glycoprotein V<br>OS=Homo sapiens<br>GN=GP5 PE=1<br>SV=1 - [GPV_HUMAN]                                           | 2.50  | 1 | 2  | 2  | 2  | 0.937 | 1.762 | 0.932 | 0.934 | 3.85   | 2.50  | 2  | 2  | 560  | 60.9  | 9.63 |
| Q68EM7 | Rho GTPase-activating protein 17<br>OS=Homo sapiens<br>GN=ARHGAP17<br>PE=1 SV=1 - [RHG17_HUMAN]                           | 36.55 | 1 | 21 | 21 | 58 | 1.037 | 0.693 | 1.105 | 0.935 | 163.30 | 36.55 | 31 | 58 | 881  | 95.4  | 7.62 |
| Q9H977 | WD repeat-containing protein 54<br>OS=Homo sapiens<br>GN=WDR54<br>PE=1 SV=1 - [WDR54_HUMAN]                               | 2.99  | 1 | 1  | 1  | 4  | 1.155 | 0.858 | 1.048 | 0.935 | 7.27   | 2.99  | 2  | 4  | 334  | 35.9  | 6.20 |
| Q7Z2Z2 | Elongation factor Tu GTP-binding domain-containing protein 1<br>OS=Homo sapiens<br>GN=EFTUD1<br>PE=1 SV=2 - [ETUD1_HUMAN] | 10.71 | 1 | 12 | 12 | 34 | 1.047 | 1.315 | 1.280 | 0.935 | 59.66  | 10.71 | 20 | 34 | 1120 | 125.3 | 5.91 |
| Q0PNE2 | Elongator complex protein 6<br>OS=Homo sapiens<br>GN=ELP6 PE=1<br>SV=1 - [ELP6_HUMAN]                                     | 5.64  | 1 | 1  | 1  | 2  | 0.768 | 1.014 | 0.762 | 0.935 | 5.53   | 5.64  | 2  | 2  | 266  | 29.8  | 6.84 |
| Q8IZF3 | Probable G-protein coupled receptor 115<br>OS=Homo sapiens<br>GN=GPR115<br>PE=2 SV=3 - [GP115_HUMAN]                      | 2.30  | 1 | 1  | 1  | 1  | 2.679 | 1.968 | 1.777 | 0.935 | 2.89   | 2.30  | 1  | 1  | 695  | 77.7  | 9.01 |
| O60762 | Dolichol-phosphate mannosyltransferase subunit 1<br>OS=Homo sapiens<br>GN=DPM1<br>PE=1 SV=1 - [DPM1_HUMAN]                | 21.92 | 1 | 5  | 5  | 13 | 0.816 | 0.890 | 0.725 | 0.935 | 36.57  | 21.92 | 6  | 13 | 260  | 29.6  | 9.57 |
| Q9BZH6 | WD repeat-containing protein 11<br>OS=Homo sapiens<br>GN=WDR11<br>PE=1 SV=1 - [WDR11_HUMAN]                               | 8.33  | 1 | 10 | 10 | 32 | 0.809 | 0.833 | 0.875 | 0.935 | 56.99  | 8.33  | 16 | 32 | 1224 | 136.6 | 6.92 |

|        |                                                                                                                     |       |   |    |    |    |       |       |       |       |        |       |    |    |      |       |      |
|--------|---------------------------------------------------------------------------------------------------------------------|-------|---|----|----|----|-------|-------|-------|-------|--------|-------|----|----|------|-------|------|
| Q969N4 | Trace amine-associated receptor 8<br>OS=Homo sapiens<br>GN=TAAR8<br>PE=2 SV=1 - [TAAR8_HUMAN]                       | 3.80  | 1 | 1  | 1  | 2  | 0.821 | 0.869 | 0.530 | 0.935 | 4.70   | 3.80  | 1  | 2  | 342  | 38.0  | 6.81 |
| Q9NX05 | Constitutive coactivator of PPAR-gamma-like protein 2<br>OS=Homo sapiens<br>GN=FAM120C<br>PE=2 SV=3 - [F120C_HUMAN] | 6.48  | 1 | 4  | 6  | 14 | 1.075 | 0.737 | 0.675 | 0.935 | 28.01  | 6.48  | 9  | 14 | 1096 | 120.5 | 9.03 |
| Q9NPQ8 | Synembryon-A<br>OS=Homo sapiens<br>GN=RIC8A<br>PE=1 SV=3 - [RIC8A_HUMAN]                                            | 23.54 | 1 | 10 | 11 | 61 | 1.058 | 0.847 | 1.083 | 0.935 | 154.64 | 23.54 | 19 | 61 | 531  | 59.7  | 5.33 |
| Q15835 | Rhodopsin kinase<br>OS=Homo sapiens<br>GN=GRK1<br>PE=1 SV=1 - [RK_HUMAN]                                            | 1.07  | 1 | 1  | 1  | 1  | 0.905 | 0.808 | 1.201 | 0.935 | 2.31   | 1.07  | 1  | 1  | 563  | 63.5  | 5.87 |
| Q96A54 | Adiponectin receptor protein 1<br>OS=Homo sapiens<br>GN=ADIPOR1<br>PE=1 SV=1 - [ADR1_HUMAN]                         | 4.00  | 1 | 1  | 1  | 7  | 0.851 | 0.777 | 0.813 | 0.935 | 7.98   | 4.00  | 2  | 7  | 375  | 42.6  | 7.02 |
| O94842 | TOX high mobility group box family member 4<br>OS=Homo sapiens<br>GN=TOX4<br>PE=1 SV=1 - [TOX4_HUMAN]               | 5.48  | 2 | 2  | 3  | 4  | 1.026 | 1.260 | 1.187 | 0.935 | 11.33  | 5.48  | 4  | 4  | 621  | 66.2  | 5.06 |
| P0C875 | Protein FAM228B<br>OS=Homo sapiens<br>GN=FAM228B<br>PE=2 SV=1 - [F228B_HUMAN]                                       | 3.43  | 1 | 1  | 1  | 1  |       | 1.296 | 2.509 | 0.935 | 2.46   | 3.43  | 1  | 1  | 321  | 37.4  | 9.29 |
| P40616 | ADP-ribosylation factor-like protein 1<br>OS=Homo sapiens<br>GN=ARL1 PE=1 SV=1 - [ARL1_HUMAN]                       | 16.57 | 1 | 2  | 2  | 16 | 0.915 | 0.597 | 0.727 | 0.935 | 53.00  | 16.57 | 3  | 16 | 181  | 20.4  | 5.72 |
| Q8N6T3 | ADP-ribosylation factor GTPase-activating protein 1<br>OS=Homo sapiens<br>GN=ARFGAP1<br>PE=1 SV=2 - [ARFG1_HUMAN]   | 39.41 | 1 | 15 | 15 | 68 | 0.827 | 0.894 | 0.998 | 0.935 | 144.70 | 39.41 | 25 | 68 | 406  | 44.6  | 5.66 |



|        |                                                                                                                   |       |   |    |    |      |       |       |       |       |         |       |    |      |      |       |       |
|--------|-------------------------------------------------------------------------------------------------------------------|-------|---|----|----|------|-------|-------|-------|-------|---------|-------|----|------|------|-------|-------|
| Q8TEH3 | DENN domain-containing protein 1A<br>OS=Homo sapiens<br>GN=DENND1A<br>PE=1 SV=2 - [DENND1A_HUMAN]                 | 3.17  | 1 | 2  | 2  | 4    | 0.573 | 1.158 | 0.961 | 0.935 | 9.63    | 3.17  | 2  | 4    | 1009 | 110.5 | 6.96  |
| Q9NRG9 | Aladin<br>OS=Homo sapiens<br>GN=AAAS<br>PE=1 SV=1 - [AAAS_HUMAN]                                                  | 3.48  | 1 | 2  | 2  | 2    | 1.078 | 1.767 | 1.266 | 0.935 | 3.96    | 3.48  | 2  | 2    | 546  | 59.5  | 7.50  |
| P48739 | Phosphatidylinositol transfer protein beta isoform<br>OS=Homo sapiens<br>GN=PITPNB<br>PE=1 SV=2 - [PITPNB_HUMAN]  | 51.29 | 1 | 13 | 14 | 41   | 0.837 | 0.948 | 0.912 | 0.935 | 106.68  | 51.29 | 20 | 41   | 271  | 31.5  | 6.87  |
| P47914 | 60S ribosomal protein L29<br>OS=Homo sapiens<br>GN=RPL29<br>PE=1 SV=2 - [RPL29_HUMAN]                             | 22.64 | 1 | 4  | 4  | 41   | 0.823 | 1.111 | 1.344 | 0.935 | 80.81   | 22.64 | 6  | 41   | 159  | 17.7  | 11.66 |
| Q99996 | A-kinase anchor protein 9<br>OS=Homo sapiens<br>GN=AKAP9<br>PE=1 SV=3 - [AKAP9_HUMAN]                             | 9.26  | 6 | 31 | 39 | 72   | 0.854 | 0.886 | 0.956 | 0.935 | 118.19  | 9.26  | 50 | 72   | 3911 | 453.4 | 4.98  |
| P14735 | Insulin-degrading enzyme<br>OS=Homo sapiens<br>GN=IDE PE=1 SV=4 - [IDE_HUMAN]                                     | 24.53 | 1 | 23 | 23 | 54   | 0.890 | 0.729 | 0.897 | 0.936 | 98.79   | 24.53 | 35 | 54   | 1019 | 117.9 | 6.61  |
| P08133 | Annexin A6<br>OS=Homo sapiens<br>GN=ANXA6<br>PE=1 SV=3 - [ANXA6_HUMAN]                                            | 72.96 | 1 | 56 | 56 | 1130 | 1.236 | 1.051 | 1.324 | 0.936 | 2983.49 | 72.96 | 99 | 1130 | 673  | 75.8  | 5.60  |
| A5D8V6 | Vacuolar protein sorting-associated protein 37C<br>OS=Homo sapiens<br>GN=VPS37C<br>PE=1 SV=2 - [VPS37C_HUMAN]     | 10.99 | 1 | 3  | 3  | 8    | 0.956 | 1.186 | 1.388 | 0.936 | 19.15   | 10.99 | 6  | 8    | 355  | 38.6  | 5.21  |
| Q02779 | Mitogen-activated protein kinase kinase kinase 10<br>OS=Homo sapiens<br>GN=MAP3K10<br>PE=1 SV=3 - [MAP3K10_HUMAN] | 5.03  | 3 | 2  | 3  | 9    | 1.230 | 0.653 | 0.549 | 0.936 | 14.76   | 5.03  | 4  | 9    | 954  | 103.6 | 7.01  |

|        |                                                                                                              |       |   |   |    |    |       |       |       |       |        |       |    |    |      |       |      |
|--------|--------------------------------------------------------------------------------------------------------------|-------|---|---|----|----|-------|-------|-------|-------|--------|-------|----|----|------|-------|------|
| P42356 | Phosphatidylinositol 4-kinase alpha<br>OS=Homo sapiens<br>GN=PI4KA<br>PE=1 SV=3 - [PI4KA_HUMAN]              | 4.31  | 5 | 9 | 9  | 11 | 1.205 | 1.004 | 0.884 | 0.936 | 18.60  | 4.31  | 11 | 11 | 2044 | 231.2 | 6.87 |
| Q9NX62 | Inositol monophosphatase 3<br>OS=Homo sapiens<br>GN=IMPAD1<br>PE=1 SV=1 - [IMPA3_HUMAN]                      | 10.03 | 1 | 4 | 4  | 15 | 0.764 | 0.865 | 1.002 | 0.936 | 34.49  | 10.03 | 7  | 15 | 359  | 38.7  | 6.86 |
| P61026 | Ras-related protein Rab-10<br>OS=Homo sapiens<br>GN=RAB10<br>PE=1 SV=1 - [RAB10_HUMAN]                       | 55.00 | 2 | 7 | 11 | 77 | 1.393 | 0.854 | 0.873 | 0.936 | 166.56 | 55.00 | 17 | 77 | 200  | 22.5  | 8.38 |
| P36543 | V-type proton ATPase subunit E 1<br>OS=Homo sapiens<br>GN=ATP6V1E1<br>PE=1 SV=1 - [VATE1_HUMAN]              | 40.71 | 1 | 5 | 10 | 49 | 1.114 | 1.010 | 0.786 | 0.936 | 97.25  | 40.71 | 17 | 49 | 226  | 26.1  | 8.00 |
| Q9UJY4 | ADP-ribosylation factor-binding protein GGA2<br>OS=Homo sapiens<br>GN=GGA2<br>PE=1 SV=3 - [GGA2_HUMAN]       | 16.48 | 1 | 7 | 7  | 8  | 1.046 | 1.282 | 0.987 | 0.936 | 15.49  | 16.48 | 8  | 8  | 613  | 67.1  | 6.55 |
| Q9NQ89 | Uncharacterized protein C12orf4<br>OS=Homo sapiens<br>GN=C12orf4<br>PE=2 SV=1 - [CL004_HUMAN]                | 2.72  | 1 | 1 | 2  | 2  | 0.789 | 0.815 | 0.972 | 0.936 | 5.91   | 2.72  | 2  | 2  | 552  | 63.8  | 6.37 |
| Q86Y56 | Dynein assembly factor 5, axonemal<br>OS=Homo sapiens<br>GN=HEATR2<br>PE=1 SV=4 - [DAAFS_HUMAN]              | 5.61  | 1 | 5 | 5  | 12 | 0.788 | 1.252 | 0.821 | 0.936 | 31.50  | 5.61  | 7  | 12 | 855  | 93.5  | 6.42 |
| Q7Z7G8 | Vacuolar protein sorting-associated protein 13B<br>OS=Homo sapiens<br>GN=VPS13B<br>PE=1 SV=2 - [VP13B_HUMAN] | 0.85  | 1 | 2 | 3  | 4  | 0.570 | 1.965 | 1.943 | 0.937 | 4.09   | 0.85  | 3  | 4  | 4022 | 448.4 | 6.46 |
| O75844 | CAAX prenyl protease 1 homolog<br>OS=Homo sapiens<br>GN=ZMPSTE24<br>PE=1 SV=2 - [FACE1_HUMAN]                | 15.79 | 1 | 6 | 6  | 13 | 0.828 | 0.915 | 0.879 | 0.937 | 42.06  | 15.79 | 7  | 13 | 475  | 54.8  | 7.49 |

|        |                                                                                                                  |       |   |    |    |     |       |       |       |       |        |       |    |     |      |       |       |
|--------|------------------------------------------------------------------------------------------------------------------|-------|---|----|----|-----|-------|-------|-------|-------|--------|-------|----|-----|------|-------|-------|
| P55145 | Mesencephalic astrocyte-derived neurotrophic factor<br>OS=Homo sapiens<br>GN=MANF<br>PE=1 SV=3 - [MANF_HUMAN]    | 51.65 | 1 | 15 | 15 | 58  | 0.870 | 1.029 | 0.850 | 0.937 | 116.95 | 51.65 | 21 | 58  | 182  | 20.7  | 8.69  |
| Q9H5N1 | Rab GTPase-binding effector protein 2<br>OS=Homo sapiens<br>GN=RABEP2<br>PE=1 SV=2 - [RABE2_HUMAN]               | 23.37 | 3 | 11 | 12 | 57  | 1.069 | 1.016 | 1.020 | 0.937 | 145.02 | 23.37 | 23 | 57  | 569  | 63.5  | 4.78  |
| O95218 | Zinc finger Ran-binding domain-containing protein 2<br>OS=Homo sapiens<br>GN=ZRANB2<br>PE=1 SV=2 - [ZRAB2_HUMAN] | 16.36 | 1 | 4  | 5  | 17  | 0.810 | 0.830 | 0.667 | 0.937 | 36.81  | 16.36 | 7  | 17  | 330  | 37.4  | 10.01 |
| Q15643 | Thyroid receptor-interacting protein 11<br>OS=Homo sapiens<br>GN=TRIP11<br>PE=1 SV=3 - [TRIPB_HUMAN]             | 11.07 | 2 | 21 | 23 | 45  | 0.824 | 0.710 | 0.812 | 0.937 | 97.93  | 11.07 | 32 | 45  | 1979 | 227.4 | 5.26  |
| P61923 | Coatomer subunit zeta-1<br>OS=Homo sapiens<br>GN=COPZ1<br>PE=1 SV=1 - [COPZ1_HUMAN]                              | 45.76 | 1 | 6  | 6  | 58  | 0.971 | 0.889 | 0.718 | 0.937 | 165.02 | 45.76 | 9  | 58  | 177  | 20.2  | 4.81  |
| P22307 | Non-specific lipid-transfer protein<br>OS=Homo sapiens<br>GN=SCP2<br>PE=1 SV=2 - [NLTP_HUMAN]                    | 38.94 | 1 | 24 | 24 | 166 | 1.158 | 0.895 | 0.998 | 0.937 | 373.26 | 38.94 | 38 | 166 | 547  | 59.0  | 6.89  |
| Q96MW5 | Conserved oligomeric Golgi complex subunit 8<br>OS=Homo sapiens<br>GN=COG8<br>PE=1 SV=2 - [COG8_HUMAN]           | 17.81 | 1 | 7  | 7  | 12  | 0.768 | 1.058 | 1.222 | 0.937 | 28.93  | 17.81 | 9  | 12  | 612  | 68.4  | 5.20  |
| P55263 | Adenosine kinase<br>OS=Homo sapiens<br>GN=ADK PE=1 SV=2 - [ADK_HUMAN]                                            | 24.86 | 1 | 11 | 11 | 24  | 0.684 | 0.994 | 0.931 | 0.937 | 60.36  | 24.86 | 15 | 24  | 362  | 40.5  | 6.70  |

|        |                                                                                                             |       |   |    |    |     |       |       |       |       |         |       |    |     |      |       |      |
|--------|-------------------------------------------------------------------------------------------------------------|-------|---|----|----|-----|-------|-------|-------|-------|---------|-------|----|-----|------|-------|------|
| Q9Y2Z0 | Suppressor of G2 allele of SKP1 homolog<br>OS=Homo sapiens<br>GN=SUGT1<br>PE=1 SV=3 - [SUGT1_HUMAN]         | 53.15 | 1 | 17 | 17 | 76  | 0.781 | 0.959 | 1.035 | 0.937 | 191.84  | 53.15 | 27 | 76  | 365  | 41.0  | 5.16 |
| P31946 | 14-3-3 protein beta/alpha<br>OS=Homo sapiens<br>GN=YWHAB<br>PE=1 SV=3 - [1433B_HUMAN]                       | 76.42 | 2 | 12 | 21 | 390 | 1.048 | 0.939 | 0.945 | 0.937 | 1115.16 | 76.42 | 29 | 390 | 246  | 28.1  | 4.83 |
| Q9NRN5 | Olfactomedin-like protein 3<br>OS=Homo sapiens<br>GN=OLFL3<br>PE=2 SV=1 - [OLFL3_HUMAN]                     | 4.43  | 1 | 2  | 2  | 3   | 0.694 | 1.416 | 0.590 | 0.937 | 5.90    | 4.43  | 2  | 3   | 406  | 46.0  | 6.57 |
| P05386 | 60S acidic ribosomal protein P1<br>OS=Homo sapiens<br>GN=RPLP1<br>PE=1 SV=1 - [RLA1_HUMAN]                  | 34.21 | 1 | 2  | 3  | 36  | 0.828 | 0.780 | 0.737 | 0.937 | 144.70  | 34.21 | 4  | 36  | 114  | 11.5  | 4.32 |
| Q9Y6G5 | COMM domain-containing protein 10<br>OS=Homo sapiens<br>GN=COMMD10<br>PE=1 SV=1 - [COMDA_HUMAN]             | 18.81 | 1 | 3  | 3  | 5   | 0.969 | 1.012 | 0.848 | 0.937 | 12.36   | 18.81 | 4  | 5   | 202  | 23.0  | 6.54 |
| Q7RTW8 | Otoancorin<br>OS=Homo sapiens<br>GN=OTOA<br>PE=1 SV=1 - [OTOAN_HUMAN]                                       | 1.30  | 1 | 1  | 1  | 1   | 2.013 | 1.063 | 0.998 | 0.937 | 2.41    | 1.30  | 1  | 1   | 1153 | 128.5 | 5.82 |
| Q14676 | Mediator of DNA damage checkpoint protein 1<br>OS=Homo sapiens<br>GN=MDC1<br>PE=1 SV=3 - [MDC1_HUMAN]       | 1.24  | 1 | 2  | 2  | 3   | 0.888 | 1.817 | 1.008 | 0.937 | 7.80    | 1.24  | 3  | 3   | 2089 | 226.5 | 5.47 |
| Q96GY0 | Zinc finger C2HC domain-containing protein 1A<br>OS=Homo sapiens<br>GN=ZC2HC1A<br>PE=1 SV=2 - [ZC21A_HUMAN] | 27.38 | 1 | 10 | 10 | 25  | 1.115 | 1.693 | 1.647 | 0.937 | 51.47   | 27.38 | 17 | 25  | 325  | 35.1  | 9.82 |
| Q7Z4H3 | HD domain-containing protein 2<br>OS=Homo sapiens<br>GN=HDDC2<br>PE=1 SV=1 - [HDDC2_HUMAN]                  | 17.65 | 1 | 3  | 3  | 9   | 1.026 | 1.185 | 1.376 | 0.937 | 21.26   | 17.65 | 4  | 9   | 204  | 23.4  | 5.49 |

|        |                                                                                                              |       |   |    |    |     |       |       |       |       |        |       |    |     |      |       |      |
|--------|--------------------------------------------------------------------------------------------------------------|-------|---|----|----|-----|-------|-------|-------|-------|--------|-------|----|-----|------|-------|------|
| O94788 | Retinal dehydrogenase 2 OS=Homo sapiens<br>GN=ALDH1A2<br>PE=1 SV=3 - [AL1A2_HUMAN]                           | 6.95  | 1 | 3  | 5  | 11  | 0.670 | 2.771 | 3.635 | 0.937 | 25.39  | 6.95  | 7  | 11  | 518  | 56.7  | 6.05 |
| P28827 | Receptor-type tyrosine-protein phosphatase mu OS=Homo sapiens<br>GN=PTPRM<br>PE=1 SV=2 - [PTPRM_HUMAN]       | 4.68  | 1 | 5  | 6  | 17  | 2.308 | 0.623 | 1.015 | 0.938 | 29.66  | 4.68  | 10 | 17  | 1452 | 163.6 | 6.65 |
| Q15363 | Transmembrane domain-containing protein 2 OS=Homo sapiens<br>GN=TMED2<br>PE=1 SV=1 - [TMED2_HUMAN]           | 29.85 | 1 | 6  | 6  | 37  | 0.800 | 0.930 | 0.791 | 0.938 | 86.85  | 29.85 | 9  | 37  | 201  | 22.7  | 5.17 |
| Q9BVG9 | Phosphatidyserine synthase 2 OS=Homo sapiens<br>GN=PTDSS2<br>PE=1 SV=1 - [PTSS2_HUMAN]                       | 7.60  | 1 | 2  | 2  | 3   | 1.409 | 0.949 | 0.840 | 0.938 | 10.69  | 7.60  | 2  | 3   | 487  | 56.2  | 6.25 |
| O43432 | Eukaryotic translation initiation factor 4 gamma 3 OS=Homo sapiens<br>GN=EIF4G3<br>PE=1 SV=2 - [IF4G3_HUMAN] | 26.18 | 1 | 31 | 40 | 161 | 1.035 | 0.795 | 0.842 | 0.938 | 342.51 | 26.18 | 62 | 161 | 1585 | 176.5 | 5.38 |
| P55289 | Cadherin-12 OS=Homo sapiens<br>GN=CDH12<br>PE=2 SV=2 - [CAD12_HUMAN]                                         | 1.26  | 1 | 1  | 1  | 1   | 0.882 | 0.990 | 1.195 | 0.938 | 3.27   | 1.26  | 1  | 1   | 794  | 88.3  | 4.81 |
| Q7RTS9 | Dymedin OS=Homo sapiens<br>GN=DYM PE=1 SV=1 - [DYM_HUMAN]                                                    | 1.49  | 1 | 1  | 1  | 6   | 0.800 | 0.746 | 0.791 | 0.938 | 10.35  | 1.49  | 2  | 6   | 669  | 75.9  | 5.86 |
| Q00587 | Cdc42 effector protein 1 OS=Homo sapiens<br>GN=CDC42EP1<br>PE=1 SV=1 - [BORG5_HUMAN]                         | 23.02 | 1 | 7  | 7  | 25  | 0.981 | 0.416 | 0.642 | 0.938 | 64.98  | 23.02 | 12 | 25  | 391  | 40.3  | 7.15 |
| Q6ZMP0 | Thrombospondin type-1 domain-containing protein 4 OS=Homo sapiens<br>GN=THSD4<br>PE=2 SV=2 - [THSD4_HUMAN]   | 1.47  | 1 | 1  | 1  | 2   | 0.727 | 0.567 | 1.119 | 0.938 | 8.26   | 1.47  | 1  | 2   | 1018 | 112.4 | 7.65 |

|        |                                                                                                                             |       |   |    |    |    |       |       |       |       |        |       |    |    |      |       |      |
|--------|-----------------------------------------------------------------------------------------------------------------------------|-------|---|----|----|----|-------|-------|-------|-------|--------|-------|----|----|------|-------|------|
| P56524 | Histone deacetylase 4<br>OS=Homo sapiens<br>GN=HDAC4<br>PE=1 SV=3 - [HDAC4_HUMAN]                                           | 6.37  | 1 | 5  | 5  | 16 | 0.959 | 1.588 | 0.969 | 0.938 | 46.64  | 6.37  | 8  | 16 | 1084 | 119.0 | 6.96 |
| Q7Z739 | YTH domain-containing family protein 3<br>OS=Homo sapiens<br>GN=YTHDF3<br>PE=1 SV=1 - [YTHD3_HUMAN]                         | 15.73 | 1 | 7  | 8  | 35 | 1.030 | 0.896 | 0.927 | 0.938 | 65.50  | 15.73 | 13 | 35 | 585  | 63.8  | 9.04 |
| Q8TF05 | Serine/threonine-protein phosphatase 4 regulatory subunit 1<br>OS=Homo sapiens<br>GN=PPP4R1<br>PE=1 SV=1 - [PP4R1_HUMAN]    | 8.21  | 1 | 7  | 7  | 22 | 1.025 | 1.005 | 1.222 | 0.938 | 52.81  | 8.21  | 11 | 22 | 950  | 106.9 | 4.77 |
| Q99471 | Prefoldin subunit 5<br>OS=Homo sapiens<br>GN=PFDN5<br>PE=1 SV=2 - [PFD5_HUMAN]                                              | 74.68 | 1 | 9  | 9  | 24 | 0.882 | 1.048 | 0.998 | 0.938 | 67.12  | 74.68 | 13 | 24 | 154  | 17.3  | 6.33 |
| Q8TDH9 | Biogenesis of lysosome-related organelles complex 1 subunit 5<br>OS=Homo sapiens<br>GN=BLOC1S5<br>PE=1 SV=1 - [BL1S5_HUMAN] | 26.20 | 1 | 4  | 5  | 12 | 0.867 | 0.955 | 1.021 | 0.938 | 22.34  | 26.20 | 7  | 12 | 187  | 21.6  | 7.59 |
| Q99504 | Eyes absent homolog 3<br>OS=Homo sapiens<br>GN=EYA3<br>PE=1 SV=3 - [EYA3_HUMAN]                                             | 2.44  | 1 | 1  | 1  | 1  | 1.226 | 1.181 | 1.028 | 0.938 | 3.97   | 2.44  | 1  | 1  | 573  | 62.6  | 5.21 |
| O14964 | Hepatocyte growth factor-regulated tyrosine kinase substrate<br>OS=Homo sapiens<br>GN=HGS PE=1 SV=1 - [HGS_HUMAN]           | 21.36 | 1 | 19 | 19 | 74 | 1.033 | 0.965 | 0.914 | 0.938 | 157.15 | 21.36 | 32 | 74 | 777  | 86.1  | 6.16 |
| Q5HYC2 | Uncharacterized protein KIAA2026<br>OS=Homo sapiens<br>GN=KIAA2026<br>PE=2 SV=2 - [K2026_HUMAN]                             | 2.19  | 1 | 2  | 3  | 9  | 1.062 | 0.595 | 1.201 | 0.938 | 20.93  | 2.19  | 3  | 9  | 2103 | 227.9 | 9.04 |

|        |                                                                                                                                     |       |   |    |    |     |       |       |       |       |         |       |    |     |      |       |      |
|--------|-------------------------------------------------------------------------------------------------------------------------------------|-------|---|----|----|-----|-------|-------|-------|-------|---------|-------|----|-----|------|-------|------|
| Q96FJ0 | AMSH-like<br>protease<br>OS=Homo<br>sapiens<br>GN=STAMBPL1<br>PE=1 SV=2 -<br>[STALP_HUMAN<br>]                                      | 21.56 | 1 | 9  | 9  | 22  | 0.817 | 0.951 | 0.569 | 0.939 | 62.68   | 21.56 | 13 | 22  | 436  | 49.8  | 7.23 |
| Q9HB71 | Calcydin-<br>binding protein<br>OS=Homo<br>sapiens<br>GN=CACYBP<br>PE=1 SV=2 -<br>[CYBP_HUMAN]                                      | 47.81 | 1 | 13 | 14 | 49  | 1.193 | 1.151 | 1.088 | 0.939 | 129.78  | 47.81 | 19 | 49  | 228  | 26.2  | 8.25 |
| O94919 | Endonuclease<br>domain-<br>containing 1<br>protein<br>OS=Homo<br>sapiens<br>GN=ENDOD1<br>PE=1 SV=2 -<br>[ENDD1_HUMAN<br>]           | 11.20 | 1 | 4  | 4  | 46  | 0.422 | 0.744 | 1.032 | 0.939 | 107.01  | 11.20 | 7  | 46  | 500  | 55.0  | 5.71 |
| P25445 | Tumor necrosis<br>factor receptor<br>superfamily<br>member 6<br>OS=Homo<br>sapiens<br>GN=FAS PE=1<br>SV=1 -<br>[TNR6_HUMAN]         | 25.67 | 1 | 10 | 10 | 35  | 0.905 | 0.900 | 0.609 | 0.939 | 83.12   | 25.67 | 17 | 35  | 335  | 37.7  | 7.94 |
| Q9BQS8 | FYVE and<br>coiled-coil<br>domain-<br>containing<br>protein 1<br>OS=Homo<br>sapiens<br>GN=FYCO1<br>PE=1 SV=3 -<br>[FYCO1_HUMA<br>N] | 31.53 | 2 | 39 | 40 | 140 | 1.023 | 1.134 | 1.035 | 0.939 | 392.85  | 31.53 | 66 | 140 | 1478 | 166.9 | 4.92 |
| Q14697 | Neutral alpha-<br>glucosidase AB<br>OS=Homo<br>sapiens<br>GN=GANAB<br>PE=1 SV=3 -<br>[GANAB_HUMAN<br>]                              | 36.65 | 1 | 33 | 33 | 356 | 0.881 | 0.923 | 0.798 | 0.939 | 1058.94 | 36.65 | 56 | 356 | 944  | 106.8 | 6.14 |
| O43815 | Striatin<br>OS=Homo<br>sapiens<br>GN=STRN<br>PE=1 SV=4 -<br>[STRN_HUMAN]                                                            | 22.69 | 1 | 11 | 13 | 46  | 0.891 | 0.974 | 0.864 | 0.939 | 109.69  | 22.69 | 21 | 46  | 780  | 86.1  | 5.27 |
| P22059 | Oxysterol-<br>binding protein<br>1 OS=Homo<br>sapiens<br>GN=OSBP<br>PE=1 SV=1 -<br>[OSBP1_HUMA<br>N]                                | 21.69 | 1 | 15 | 16 | 52  | 1.003 | 0.934 | 1.062 | 0.939 | 125.43  | 21.69 | 24 | 52  | 807  | 89.4  | 7.30 |
| P22681 | E3 ubiquitin-<br>protein ligase<br>CBL OS=Homo<br>sapiens<br>GN=CBL PE=1<br>SV=2 -<br>[CBL_HUMAN]                                   | 12.69 | 1 | 8  | 8  | 18  | 0.899 | 1.229 | 1.184 | 0.939 | 37.65   | 12.69 | 12 | 18  | 906  | 99.6  | 6.54 |

|        |                                                                                                                 |       |   |    |    |     |       |       |       |       |        |       |    |     |      |       |       |
|--------|-----------------------------------------------------------------------------------------------------------------|-------|---|----|----|-----|-------|-------|-------|-------|--------|-------|----|-----|------|-------|-------|
| Q13613 | Myotubularin-related protein<br>1 OS=Homo sapiens<br>GN=MTMR1<br>PE=1 SV=4 - [MTMR1_HUMAN]                      | 4.51  | 1 | 3  | 3  | 17  | 1.004 | 0.941 | 1.091 | 0.939 | 29.24  | 4.51  | 6  | 17  | 665  | 74.6  | 7.14  |
| Q9NS87 | Kinesin-like protein KIF15<br>OS=Homo sapiens<br>GN=KIF15<br>PE=1 SV=1 - [KIF15_HUMAN]                          | 2.59  | 1 | 2  | 4  | 15  | 0.795 | 1.013 | 1.193 | 0.939 | 31.95  | 2.59  | 4  | 15  | 1388 | 160.1 | 6.00  |
| Q96SL4 | Glutathione peroxidase 7<br>OS=Homo sapiens<br>GN=GPX7<br>PE=1 SV=1 - [GPX7_HUMAN]                              | 27.27 | 1 | 4  | 4  | 13  | 0.699 | 0.757 | 0.591 | 0.939 | 31.72  | 27.27 | 8  | 13  | 187  | 21.0  | 8.27  |
| P48163 | NADP-dependent malic enzyme<br>OS=Homo sapiens<br>GN=ME1 PE=1 SV=1 - [MAOX_HUMAN]                               | 34.27 | 1 | 18 | 18 | 51  | 0.850 | 0.489 | 1.071 | 0.939 | 116.81 | 34.27 | 27 | 51  | 572  | 64.1  | 6.13  |
| P62333 | 26S protease regulatory subunit 10B<br>OS=Homo sapiens<br>GN=PSMC6<br>PE=1 SV=1 - [PRS10_HUMAN]                 | 70.44 | 1 | 26 | 26 | 119 | 0.902 | 1.013 | 1.098 | 0.939 | 304.63 | 70.44 | 43 | 119 | 389  | 44.1  | 7.49  |
| P24310 | Cytochrome c oxidase subunit 7A1, mitochondrial<br>OS=Homo sapiens<br>GN=COX7A1<br>PE=1 SV=2 - [CX7A1_HUMAN]    | 16.46 | 1 | 1  | 1  | 1   | 0.463 | 0.422 | 0.851 | 0.939 | 3.42   | 16.46 | 1  | 1   | 79   | 9.1   | 10.11 |
| Q9Y5P6 | Mannose-1-phosphate guanyltransferase beta<br>OS=Homo sapiens<br>GN=GMPPB<br>PE=1 SV=2 - [GMPPB_HUMAN]          | 20.00 | 1 | 6  | 6  | 28  | 1.122 | 1.173 | 0.968 | 0.939 | 62.81  | 20.00 | 12 | 28  | 360  | 39.8  | 6.61  |
| Q9H074 | Polyadenylate-binding protein-interacting protein 1<br>OS=Homo sapiens<br>GN=PAIP1<br>PE=1 SV=1 - [PAIP1_HUMAN] | 13.99 | 1 | 9  | 9  | 32  | 0.874 | 0.639 | 0.762 | 0.940 | 72.19  | 13.99 | 15 | 32  | 479  | 53.5  | 4.81  |
| Q86SK9 | Stearoyl-CoA desaturase 5<br>OS=Homo sapiens<br>GN=SCD5<br>PE=1 SV=2 - [SCD5_HUMAN]                             | 9.70  | 1 | 2  | 2  | 10  | 1.416 | 1.370 | 0.904 | 0.940 | 18.63  | 9.70  | 3  | 10  | 330  | 37.6  | 9.61  |



|        |                                                                                                                  |       |   |    |    |     |       |       |       |       |        |       |    |     |      |       |      |
|--------|------------------------------------------------------------------------------------------------------------------|-------|---|----|----|-----|-------|-------|-------|-------|--------|-------|----|-----|------|-------|------|
| Q9H082 | Ras-related protein Rab-33B OS=Homo sapiens<br>GN=RAB33B<br>PE=1 SV=1 - [RB33B_HUMAN]                            | 13.97 | 2 | 1  | 3  | 25  | 0.764 | 0.925 | 1.104 | 0.940 | 54.92  | 13.97 | 5  | 25  | 229  | 25.7  | 7.18 |
| O00459 | Phosphatidylinositol 3-kinase regulatory subunit beta OS=Homo sapiens<br>GN=PIK3R2<br>PE=1 SV=2 - [P85B_HUMAN]   | 16.48 | 1 | 8  | 11 | 29  | 0.930 | 0.892 | 1.083 | 0.940 | 69.48  | 16.48 | 15 | 29  | 728  | 81.5  | 6.43 |
| Q9H2M9 | Rab3 GTPase-activating protein non-catalytic subunit OS=Homo sapiens<br>GN=RAB3GAP2<br>PE=1 SV=1 - [RBGPR_HUMAN] | 18.59 | 1 | 19 | 20 | 63  | 0.840 | 0.868 | 0.942 | 0.940 | 144.91 | 18.59 | 32 | 63  | 1393 | 155.9 | 5.62 |
| Q9ULV5 | Heat shock factor protein 4 OS=Homo sapiens<br>GN=HSF4<br>PE=1 SV=2 - [HSF4_HUMAN]                               | 3.66  | 1 | 1  | 1  | 2   | 1.297 | 0.569 | 0.851 | 0.940 | 0.00   | 3.66  | 1  | 2   | 492  | 53.0  | 5.40 |
| O14841 | 5-oxoprolinase OS=Homo sapiens<br>GN=OPLAH<br>PE=1 SV=3 - [OPLA_HUMAN]                                           | 4.74  | 1 | 5  | 5  | 12  | 0.975 | 1.123 | 0.959 | 0.940 | 31.25  | 4.74  | 8  | 12  | 1288 | 137.4 | 6.58 |
| Q5JRX3 | Presequence protease, mitochondrial OS=Homo sapiens<br>GN=PITRM1<br>PE=1 SV=3 - [PREP_HUMAN]                     | 44.55 | 1 | 38 | 38 | 140 | 0.737 | 1.381 | 1.216 | 0.940 | 348.42 | 44.55 | 58 | 140 | 1037 | 117.3 | 6.92 |
| P42694 | Probable helicase with zinc finger domain OS=Homo sapiens<br>GN=HELZ PE=1 SV=2 - [HELZ_HUMAN]                    | 1.85  | 1 | 3  | 3  | 7   | 0.932 | 0.912 | 1.035 | 0.940 | 14.09  | 1.85  | 4  | 7   | 1942 | 218.8 | 7.42 |
| Q00169 | Phosphatidylinositol transfer protein alpha isoform OS=Homo sapiens<br>GN=PITPNA<br>PE=1 SV=2 - [PIPNA_HUMAN]    | 39.26 | 1 | 10 | 11 | 43  | 1.176 | 0.868 | 0.990 | 0.940 | 95.69  | 39.26 | 16 | 43  | 270  | 31.8  | 6.55 |
| Q9BUN8 | Derlin-1 OS=Homo sapiens<br>GN=DERL1<br>PE=1 SV=1 - [DERL1_HUMAN]                                                | 5.58  | 1 | 1  | 1  | 6   | 0.823 | 0.827 | 0.716 | 0.940 | 13.19  | 5.58  | 2  | 6   | 251  | 28.8  | 9.51 |

|        |                                                                                                                                                  |       |   |    |    |    |       |       |       |       |        |       |    |    |      |       |       |
|--------|--------------------------------------------------------------------------------------------------------------------------------------------------|-------|---|----|----|----|-------|-------|-------|-------|--------|-------|----|----|------|-------|-------|
| Q75683 | Surfeit locus<br>protein 6<br>OS=Homo<br>sapiens<br>GN=SURF6<br>PE=1 SV=3 -<br>[SURF6_HUMAN<br>]                                                 | 21.61 | 1 | 8  | 8  | 24 | 0.927 | 0.978 | 0.804 | 0.940 | 55.77  | 21.61 | 11 | 24 | 361  | 41.4  | 10.64 |
| Q43847 | Nardilysin<br>OS=Homo<br>sapiens<br>GN=NRD1<br>PE=1 SV=2 -<br>[NRDC_HUMAN]                                                                       | 13.74 | 1 | 13 | 14 | 47 | 0.768 | 0.776 | 0.839 | 0.941 | 126.00 | 13.74 | 20 | 47 | 1150 | 131.5 | 5.00  |
| Q43854 | EGF-like repeat<br>and discoidin I-<br>like domain-<br>containing<br>protein 3<br>OS=Homo<br>sapiens<br>GN=EDIL3<br>PE=1 SV=1 -<br>[EDIL3_HUMAN] | 4.17  | 1 | 2  | 2  | 2  | 1.165 | 1.234 | 1.780 | 0.941 | 4.36   | 4.17  | 2  | 2  | 480  | 53.7  | 7.28  |
| Q9NZ09 | Ubiquitin-<br>assodated<br>protein 1<br>OS=Homo<br>sapiens<br>GN=UBAP1<br>PE=1 SV=1 -<br>[UBAP1_HUMAN<br>]                                       | 5.38  | 1 | 3  | 3  | 3  | 1.276 | 0.932 | 1.124 | 0.941 | 6.34   | 5.38  | 3  | 3  | 502  | 55.0  | 5.11  |
| Q15102 | Platelet-<br>activating<br>factor<br>acetylhydrolase<br>IB subunit<br>gamma<br>OS=Homo<br>sapiens<br>GN=PFAH1B3<br>PE=1 SV=1 -<br>[PA1B3_HUMAN]  | 16.88 | 1 | 3  | 3  | 25 | 1.212 | 1.865 | 1.243 | 0.941 | 41.39  | 16.88 | 6  | 25 | 231  | 25.7  | 6.84  |
| Q9Y263 | Phospholipase<br>A-2-activating<br>protein<br>OS=Homo<br>sapiens<br>GN=PLAA PE=1<br>SV=2 -<br>[PLAP_HUMAN]                                       | 25.53 | 1 | 17 | 17 | 81 | 0.941 | 0.971 | 1.116 | 0.941 | 205.64 | 25.53 | 29 | 81 | 795  | 87.1  | 6.37  |
| Q13641 | Trophoblast<br>glycoprotein<br>OS=Homo<br>sapiens<br>GN=TPBG<br>PE=1 SV=1 -<br>[TPBG_HUMAN]                                                      | 12.62 | 2 | 5  | 6  | 20 | 0.823 | 1.303 | 0.984 | 0.941 | 43.55  | 12.62 | 9  | 20 | 420  | 46.0  | 6.83  |
| Q12965 | Unconventional<br>myosin-Ie<br>OS=Homo<br>sapiens<br>GN=MYO1E<br>PE=1 SV=2 -<br>[MYO1E_HUMA<br>N]                                                | 9.84  | 1 | 8  | 9  | 30 | 0.959 | 1.016 | 1.401 | 0.941 | 57.39  | 9.84  | 15 | 30 | 1108 | 127.0 | 8.92  |

|        |                                                                                                                    |       |   |    |    |     |       |       |       |       |        |       |    |     |      |       |      |
|--------|--------------------------------------------------------------------------------------------------------------------|-------|---|----|----|-----|-------|-------|-------|-------|--------|-------|----|-----|------|-------|------|
| Q9UMS0 | NFU1 iron-sulfur cluster scaffold homolog, mitochondrial<br>OS=Homo sapiens<br>GN=NFU1<br>PE=1 SV=2 - [NFU1_HUMAN] | 10.24 | 1 | 2  | 2  | 6   | 1.135 | 1.268 | 1.199 | 0.941 | 17.18  | 10.24 | 3  | 6   | 254  | 28.4  | 5.07 |
| P08397 | Porphobilinogen deaminase<br>OS=Homo sapiens<br>GN=HMBS<br>PE=1 SV=2 - [HEM3_HUMAN]                                | 24.38 | 1 | 9  | 9  | 28  | 0.794 | 1.133 | 1.078 | 0.941 | 69.41  | 24.38 | 15 | 28  | 361  | 39.3  | 7.18 |
| O75688 | Protein phosphatase 1B<br>OS=Homo sapiens<br>GN=PPM1B<br>PE=1 SV=1 - [PPM1B_HUMAN]                                 | 25.47 | 1 | 10 | 13 | 58  | 0.953 | 0.845 | 1.276 | 0.941 | 129.80 | 25.47 | 18 | 58  | 479  | 52.6  | 5.05 |
| Q96DT5 | Dynein heavy chain 11, axonemal<br>OS=Homo sapiens<br>GN=DNAH11<br>PE=1 SV=3 - [DYH11_HUMAN]                       | 1.50  | 2 | 5  | 6  | 7   | 1.093 | 0.843 | 0.901 | 0.941 | 1.76   | 1.50  | 6  | 7   | 4523 | 520.7 | 6.44 |
| P50502 | Hsc70-interacting protein<br>OS=Homo sapiens<br>GN=ST13<br>PE=1 SV=2 - [F10A1_HUMAN]                               | 33.60 | 3 | 12 | 12 | 117 | 0.922 | 1.148 | 1.148 | 0.941 | 260.76 | 33.60 | 20 | 117 | 369  | 41.3  | 5.27 |
| P23470 | Receptor-type tyrosine-protein phosphatase gamma<br>OS=Homo sapiens<br>GN=PTPRG<br>PE=1 SV=4 - [PTPRG_HUMAN]       | 1.45  | 1 | 2  | 2  | 6   | 1.490 | 0.998 | 0.587 | 0.941 | 14.23  | 1.45  | 4  | 6   | 1445 | 161.9 | 6.42 |
| Q5THU4 | Vacuolar protein sorting-associated protein 13D<br>OS=Homo sapiens<br>GN=VPS13D<br>PE=1 SV=2 - [VP13D_HUMAN]       | 2.21  | 1 | 6  | 7  | 11  | 0.977 | 1.009 | 1.315 | 0.942 | 13.54  | 2.21  | 8  | 11  | 4388 | 491.6 | 6.58 |
| Q8TED1 | Probable glutathione peroxidase 8<br>OS=Homo sapiens<br>GN=GPX8<br>PE=1 SV=2 - [GPX8_HUMAN]                        | 29.19 | 1 | 5  | 6  | 21  | 0.880 | 0.768 | 0.746 | 0.942 | 54.26  | 29.19 | 9  | 21  | 209  | 23.9  | 9.35 |

|        |                                                                                                                                               |       |   |    |    |      |       |       |       |       |         |       |    |      |      |       |       |
|--------|-----------------------------------------------------------------------------------------------------------------------------------------------|-------|---|----|----|------|-------|-------|-------|-------|---------|-------|----|------|------|-------|-------|
| Q9Y6W5 | Wiskott-Aldrich syndrome protein family member 2<br>OS=Homo sapiens<br>GN=WASF2<br>PE=1 SV=3 - [WASF2_HUMAN]                                  | 22.69 | 1 | 11 | 11 | 50   | 1.294 | 1.202 | 1.316 | 0.942 | 116.12  | 22.69 | 19 | 50   | 498  | 54.3  | 5.53  |
| Q9UJF2 | Ras GTPase-activating protein nGAP<br>OS=Homo sapiens<br>GN=RASAL2<br>PE=1 SV=2 - [NGAP_HUMAN]                                                | 3.86  | 2 | 2  | 5  | 11   | 0.856 | 0.502 | 1.558 | 0.942 | 16.14   | 3.86  | 8  | 11   | 1139 | 128.5 | 8.24  |
| Q9Y305 | Acyl-coenzyme A thioesterase 9, mitochondrial<br>OS=Homo sapiens<br>GN=ACOT9<br>PE=1 SV=2 - [ACOT9_HUMAN]                                     | 31.44 | 1 | 12 | 12 | 44   | 0.932 | 1.103 | 1.156 | 0.942 | 114.97  | 31.44 | 18 | 44   | 439  | 49.9  | 8.60  |
| Q9BZQ6 | degradation-enhancing alpha-mannosidase-like protein 3<br>OS=Homo sapiens<br>GN=EDEM3<br>PE=1 SV=2 - Ubiquitin carboxyl-terminal hydrolase 19 | 5.26  | 1 | 4  | 4  | 22   | 0.943 | 0.819 | 0.850 | 0.942 | 33.91   | 5.26  | 8  | 22   | 932  | 104.6 | 4.93  |
| O94966 | OS=Homo sapiens<br>GN=USP19<br>PE=1 SV=2 - [UBP19_HUMAN]                                                                                      | 2.73  | 1 | 2  | 2  | 6    | 0.707 | 0.455 | 0.440 | 0.942 | 13.05   | 2.73  | 3  | 6    | 1318 | 145.6 | 6.28  |
| P35998 | 26S protease regulatory subunit 7<br>OS=Homo sapiens<br>GN=PSMC2<br>PE=1 SV=3 - [PRS7_HUMAN]                                                  | 65.13 | 1 | 30 | 30 | 167  | 0.853 | 0.943 | 0.939 | 0.942 | 429.62  | 65.13 | 48 | 167  | 433  | 48.6  | 5.95  |
| Q07065 | Cytoskeleton-associated protein 4<br>OS=Homo sapiens<br>GN=CKAP4<br>PE=1 SV=2 - [CKAP4_HUMAN]                                                 | 67.11 | 3 | 47 | 50 | 1328 | 0.781 | 0.784 | 0.925 | 0.942 | 3457.59 | 67.11 | 87 | 1328 | 602  | 66.0  | 5.92  |
| P61313 | 60S ribosomal protein L15<br>OS=Homo sapiens<br>GN=RPL15<br>PE=1 SV=2 - [RL15_HUMAN]                                                          | 38.73 | 1 | 8  | 8  | 142  | 0.883 | 0.924 | 0.892 | 0.942 | 359.13  | 38.73 | 16 | 142  | 204  | 24.1  | 11.62 |

|        |                                                                                                                |       |   |    |    |     |       |       |       |       |        |       |    |     |      |       |      |
|--------|----------------------------------------------------------------------------------------------------------------|-------|---|----|----|-----|-------|-------|-------|-------|--------|-------|----|-----|------|-------|------|
| Q9H267 | Vacuolar protein sorting-associated protein 33B<br>OS=Homo sapiens<br>GN=VPS33B<br>PE=1 SV=2 - [VP33B_HUMAN]   | 19.12 | 1 | 10 | 10 | 32  | 1.095 | 0.829 | 0.959 | 0.942 | 85.64  | 19.12 | 16 | 32  | 617  | 70.5  | 6.71 |
| Q9NY91 | Low affinity sodium-glucose cotransporter<br>OS=Homo sapiens<br>GN=SLC5A4<br>PE=2 SV=1 - [SCSA4_HUMAN]         | 1.52  | 1 | 1  | 1  | 1   | 0.902 | 1.101 | 1.453 | 0.943 | 0.00   | 1.52  | 1  | 1   | 659  | 72.4  | 6.15 |
| Q9Y2J4 | Angiotensin-like protein 2<br>OS=Homo sapiens<br>GN=AMOTL2<br>PE=1 SV=3 - [AMOL2_HUMAN]                        | 5.78  | 1 | 4  | 5  | 11  | 0.525 | 0.905 | 0.890 | 0.943 | 17.52  | 5.78  | 6  | 11  | 779  | 85.7  | 7.30 |
| Q8WVT3 | Trafficking protein particle complex subunit 12<br>OS=Homo sapiens<br>GN=TRAPPC12<br>PE=1 SV=3 - [TPC12_HUMAN] | 15.51 | 1 | 8  | 8  | 21  | 1.157 | 1.186 | 0.997 | 0.943 | 32.88  | 15.51 | 13 | 21  | 735  | 79.3  | 4.91 |
| P60900 | Proteasome subunit alpha type-6<br>OS=Homo sapiens<br>GN=PSMA6<br>PE=1 SV=1 - [PSA6_HUMAN]                     | 53.66 | 1 | 13 | 13 | 72  | 0.984 | 0.830 | 0.880 | 0.943 | 202.87 | 53.66 | 21 | 72  | 246  | 27.4  | 6.76 |
| P05387 | 60S acidic ribosomal protein P2<br>OS=Homo sapiens<br>GN=RPLP2<br>PE=1 SV=1 - [RLA2_HUMAN]                     | 75.65 | 1 | 8  | 9  | 265 | 0.782 | 0.874 | 0.794 | 0.943 | 707.95 | 75.65 | 15 | 265 | 115  | 11.7  | 4.54 |
| Q8TCU4 | Alstrom syndrome protein 1<br>OS=Homo sapiens<br>GN=ALMS1<br>PE=1 SV=3 - [ALMS1_HUMAN]                         | 0.77  | 1 | 3  | 3  | 3   | 1.023 | 0.221 | 1.009 | 0.943 | 8.81   | 0.77  | 3  | 3   | 4167 | 460.7 | 6.28 |
| Q16854 | Deoxyguanosine kinase, mitochondrial<br>OS=Homo sapiens<br>GN=DGUOK<br>PE=1 SV=2 - [DGUOK_HUMAN]               | 2.53  | 1 | 1  | 1  | 1   | 0.891 | 0.966 | 0.732 | 0.943 | 2.82   | 2.53  | 1  | 1   | 277  | 32.0  | 8.66 |
| O14737 | Programmed cell death protein 5<br>OS=Homo sapiens<br>GN=PDCC5<br>PE=1 SV=3 - [PDCC5_HUMAN]                    | 48.00 | 1 | 6  | 6  | 34  | 0.989 | 1.162 | 1.015 | 0.943 | 75.19  | 48.00 | 10 | 34  | 125  | 14.3  | 6.04 |

|        |                                                                                                                                   |       |   |    |    |      |       |       |       |       |         |       |     |      |      |       |      |
|--------|-----------------------------------------------------------------------------------------------------------------------------------|-------|---|----|----|------|-------|-------|-------|-------|---------|-------|-----|------|------|-------|------|
| Q9C091 | GREB1-like protein<br>OS=Homo sapiens<br>GN=GREB1L<br>PE=2 SV=2 - [GRB1L_HUMAN]<br>26S proteasome non-ATPase regulatory subunit 1 | 1.98  | 1 | 2  | 3  | 4    | 0.988 | 0.779 | 0.934 | 0.943 | 0.00    | 1.98  | 3   | 4    | 1923 | 214.2 | 6.62 |
| Q99460 | OS=Homo sapiens<br>GN=PSMD1<br>PE=1 SV=2 - [PSMD1_HUMAN]<br>ProSAAS                                                               | 35.36 | 1 | 30 | 30 | 153  | 0.890 | 0.904 | 0.932 | 0.943 | 380.50  | 35.36 | 48  | 153  | 953  | 105.8 | 5.39 |
| Q9UHG2 | OS=Homo sapiens<br>GN=PCSK1N<br>PE=1 SV=1 - [PCSK1_HUMAN]                                                                         | 3.85  | 1 | 1  | 1  | 1    | 0.746 | 1.149 | 1.007 | 0.943 | 2.91    | 3.85  | 1   | 1    | 260  | 27.4  | 6.62 |
| P49006 | MARCKS-related protein<br>OS=Homo sapiens<br>GN=MARCKSL1<br>PE=1 SV=2 - [MRP_HUMAN]                                               | 24.10 | 1 | 5  | 5  | 41   | 1.121 | 1.052 | 0.953 | 0.943 | 109.60  | 24.10 | 9   | 41   | 195  | 19.5  | 4.67 |
| Q9UL46 | Proteasome activator complex subunit 2<br>OS=Homo sapiens<br>GN=PSME2<br>PE=1 SV=4 - [PSME2_HUMAN]                                | 48.95 | 1 | 10 | 10 | 46   | 1.229 | 0.906 | 0.854 | 0.943 | 105.12  | 48.95 | 15  | 46   | 239  | 27.4  | 5.73 |
| Q5T447 | E3 ubiquitin-protein ligase HECTD3<br>OS=Homo sapiens<br>GN=HECTD3<br>PE=1 SV=1 - [HECD3_HUMAN]                                   | 7.90  | 1 | 6  | 6  | 12   | 1.106 | 1.094 | 1.080 | 0.943 | 26.25   | 7.90  | 9   | 12   | 861  | 97.1  | 5.64 |
| P11021 | 78 kDa glucose-regulated protein<br>OS=Homo sapiens<br>GN=HSPA5<br>PE=1 SV=2 - [GRP78_HUMAN]                                      | 68.96 | 2 | 57 | 60 | 2133 | 0.691 | 1.072 | 0.931 | 0.943 | 5306.99 | 68.96 | 108 | 2133 | 654  | 72.3  | 5.16 |
| Q9GZT8 | Putative GTP cyclohydrolase 1 type 2 NIF3L1<br>OS=Homo sapiens<br>GN=NIF3L1<br>PE=1 SV=2 - [GTPC1_HUMAN]                          | 13.26 | 1 | 4  | 4  | 14   | 1.064 | 0.949 | 0.861 | 0.943 | 34.00   | 13.26 | 7   | 14   | 377  | 41.9  | 6.65 |
| Q9Y4P3 | Transducin beta-like protein 2<br>OS=Homo sapiens<br>GN=TBL2 PE=1 SV=1 - [TBL2_HUMAN]                                             | 37.81 | 1 | 18 | 18 | 69   | 0.909 | 0.862 | 0.835 | 0.944 | 175.29  | 37.81 | 28  | 69   | 447  | 49.8  | 9.44 |

|        |                                                                                                                     |       |   |   |    |     |       |       |       |        |       |       |     |     |      |       |      |
|--------|---------------------------------------------------------------------------------------------------------------------|-------|---|---|----|-----|-------|-------|-------|--------|-------|-------|-----|-----|------|-------|------|
| P30501 | HLA class I histocompatibility antigen, Cw-2 alpha chain<br>OS=Homo sapiens<br>GN=HLA-C<br>PE=1 SV=1 - [1C02_HUMAN] | 42.90 | 2 | 1 | 13 | 103 | 1.703 | 1.078 | 0.944 | 258.18 | 42.90 | 21    | 103 | 366 | 41.1 | 6.11  |      |
| Q96NE9 | FERM domain-containing protein 6<br>OS=Homo sapiens<br>GN=FRMD6<br>PE=1 SV=1 - [FRMD6_HUMAN]                        | 4.50  | 1 | 2 | 2  | 10  | 0.765 | 0.986 | 1.081 | 0.944  | 30.73 | 4.50  | 4   | 10  | 622  | 72.0  | 7.46 |
| Q32M45 | Anoctamin-4<br>OS=Homo sapiens<br>GN=ANO4<br>PE=2 SV=1 - [ANO4_HUMAN]                                               | 2.30  | 1 | 1 | 2  | 2   | 1.060 | 1.797 | 2.392 | 0.944  | 4.49  | 2.30  | 2   | 2   | 955  | 111.4 | 8.18 |
| Q9Y6V0 | Protein piccolo<br>OS=Homo sapiens<br>GN=PCLO<br>PE=1 SV=4 - [PCLO_HUMAN]                                           | 0.53  | 1 | 1 | 3  | 3   | 0.601 | 0.658 | 0.653 | 0.944  | 5.56  | 0.53  | 3   | 3   | 5065 | 552.9 | 6.51 |
| Q14114 | Low-density lipoprotein receptor-related protein 8<br>OS=Homo sapiens<br>GN=LRP8 PE=1 SV=4 - [LRP8_HUMAN]           | 2.70  | 1 | 1 | 3  | 6   | 1.216 | 0.915 | 1.438 | 0.944  | 9.83  | 2.70  | 4   | 6   | 963  | 105.6 | 5.05 |
| Q6PI26 | Protein SHQ1 homolog<br>OS=Homo sapiens<br>GN=SHQ1<br>PE=1 SV=2 - [SHQ1_HUMAN]                                      | 3.29  | 1 | 2 | 2  | 4   | 0.976 | 0.871 | 0.704 | 0.944  | 8.57  | 3.29  | 2   | 4   | 577  | 65.1  | 4.79 |
| Q6ZNL6 | FYVE, RhoGEF and PH domain-containing protein 5<br>OS=Homo sapiens<br>GN=FGD5<br>PE=1 SV=3 - [FGD5_HUMAN]           | 0.68  | 1 | 1 | 1  | 1   | 0.621 | 0.838 | 1.482 | 0.944  | 2.88  | 0.68  | 1   | 1   | 1462 | 159.8 | 5.01 |
| Q8NDH3 | Probable aminopeptidase NPEPL1<br>OS=Homo sapiens<br>GN=NPEPL1<br>PE=1 SV=3 - [PEPL1_HUMAN]                         | 17.78 | 1 | 7 | 7  | 43  | 1.325 | 1.114 | 1.189 | 0.944  | 93.43 | 17.78 | 10  | 43  | 523  | 55.8  | 6.87 |
| Q8NI19 | Matrix metalloproteinase-21<br>OS=Homo sapiens<br>GN=MMP21<br>PE=2 SV=2 - [MMP21_HUMAN]                             | 2.81  | 1 | 1 | 1  | 2   | 2.108 | 0.837 | 1.161 | 0.944  | 4.76  | 2.81  | 1   | 2   | 569  | 65.0  | 9.11 |

|        |                                                                                                                                                                                                                                                                                                                                                                                                                                                                                                                                                                                                                                                                                                                                                                                                                                                                                                                                                                                                                                                                               |       |   |    |    |     |       |       |       |       |        |       |    |     |      |       |      |
|--------|-------------------------------------------------------------------------------------------------------------------------------------------------------------------------------------------------------------------------------------------------------------------------------------------------------------------------------------------------------------------------------------------------------------------------------------------------------------------------------------------------------------------------------------------------------------------------------------------------------------------------------------------------------------------------------------------------------------------------------------------------------------------------------------------------------------------------------------------------------------------------------------------------------------------------------------------------------------------------------------------------------------------------------------------------------------------------------|-------|---|----|----|-----|-------|-------|-------|-------|--------|-------|----|-----|------|-------|------|
| Q9Y3A6 | Transmembrane<br>emp24<br>domain-<br>containing<br>protein 5<br>OS=Homo<br>sapiens<br>GN=TMED5<br>PE=1 SV=1 -<br>[TMED5_HUMA<br>Plekstrin<br>homology<br>domain-<br>containing<br>family M<br>member 2<br>OS=Homo<br>sapiens<br>GN=PLEKHM2<br>PE=1 SV=2 -<br>[PKHM2_HUMA<br>N]<br>Spectrin beta<br>chain, non-<br>erythrocytic 2<br>OS=Homo<br>sapiens<br>GN=SPTBN2<br>PE=1 SV=3 -<br>[SPTN2_HUMAN<br>]<br>Vesicle<br>transport<br>protein SEC20<br>OS=Homo<br>sapiens<br>GN=BNIP1<br>PE=1 SV=3 -<br>[SEC20_HUMAN<br>SEC23-<br>interacting<br>protein<br>OS=Homo<br>sapiens<br>GN=SEC23IP<br>PE=1 SV=1 -<br>[S23IP_HUMAN<br>]<br>Aspartyl<br>aminopeptidas<br>e OS=Homo<br>sapiens<br>GN=DNPEP<br>PE=1 SV=1 -<br>[DNPEP_HUMAN<br>]<br>Serine/threoni<br>ne-protein<br>kinase B-raf<br>OS=Homo<br>sapiens<br>GN=BRAF<br>PE=1 SV=4 -<br>[BRAF_HUMAN]<br>TBC1 domain<br>family member<br>5 OS=Homo<br>sapiens<br>GN=TBC1D5<br>PE=1 SV=1 -<br>[TBCD5_HUMAN<br>]<br>ELMO domain-<br>containing<br>protein 2<br>OS=Homo<br>sapiens<br>GN=ELMOD2<br>PE=1 SV=1 -<br>[ELMD2_HUMAN<br>] | 17.47 | 1 | 5  | 5  | 20  | 0.861 | 0.751 | 0.842 | 0.944 | 44.26  | 17.47 | 9  | 20  | 229  | 26.0  | 4.84 |
| Q8IWES | OS=Homo<br>sapiens<br>GN=PLEKHM2<br>PE=1 SV=2 -<br>[PKHM2_HUMA<br>N]<br>Spectrin beta<br>chain, non-<br>erythrocytic 2<br>OS=Homo<br>sapiens<br>GN=SPTBN2<br>PE=1 SV=3 -<br>[SPTN2_HUMAN<br>]<br>Vesicle<br>transport<br>protein SEC20<br>OS=Homo<br>sapiens<br>GN=BNIP1<br>PE=1 SV=3 -<br>[SEC20_HUMAN<br>SEC23-<br>interacting<br>protein<br>OS=Homo<br>sapiens<br>GN=SEC23IP<br>PE=1 SV=1 -<br>[S23IP_HUMAN<br>]<br>Aspartyl<br>aminopeptidas<br>e OS=Homo<br>sapiens<br>GN=DNPEP<br>PE=1 SV=1 -<br>[DNPEP_HUMAN<br>]<br>Serine/threoni<br>ne-protein<br>kinase B-raf<br>OS=Homo<br>sapiens<br>GN=BRAF<br>PE=1 SV=4 -<br>[BRAF_HUMAN]<br>TBC1 domain<br>family member<br>5 OS=Homo<br>sapiens<br>GN=TBC1D5<br>PE=1 SV=1 -<br>[TBCD5_HUMAN<br>]<br>ELMO domain-<br>containing<br>protein 2<br>OS=Homo<br>sapiens<br>GN=ELMOD2<br>PE=1 SV=1 -<br>[ELMD2_HUMAN<br>]                                                                                                                                                                                                           | 6.58  | 1 | 5  | 5  | 14  | 0.853 | 0.886 | 0.995 | 0.945 | 36.82  | 6.58  | 8  | 14  | 1019 | 112.7 | 4.93 |
| O15020 | OS=Homo<br>sapiens<br>GN=SPTBN2<br>PE=1 SV=3 -<br>[SPTN2_HUMAN<br>]<br>Vesicle<br>transport<br>protein SEC20<br>OS=Homo<br>sapiens<br>GN=BNIP1<br>PE=1 SV=3 -<br>[SEC20_HUMAN<br>SEC23-<br>interacting<br>protein<br>OS=Homo<br>sapiens<br>GN=SEC23IP<br>PE=1 SV=1 -<br>[S23IP_HUMAN<br>]<br>Aspartyl<br>aminopeptidas<br>e OS=Homo<br>sapiens<br>GN=DNPEP<br>PE=1 SV=1 -<br>[DNPEP_HUMAN<br>]<br>Serine/threoni<br>ne-protein<br>kinase B-raf<br>OS=Homo<br>sapiens<br>GN=BRAF<br>PE=1 SV=4 -<br>[BRAF_HUMAN]<br>TBC1 domain<br>family member<br>5 OS=Homo<br>sapiens<br>GN=TBC1D5<br>PE=1 SV=1 -<br>[TBCD5_HUMAN<br>]<br>ELMO domain-<br>containing<br>protein 2<br>OS=Homo<br>sapiens<br>GN=ELMOD2<br>PE=1 SV=1 -<br>[ELMD2_HUMAN<br>]                                                                                                                                                                                                                                                                                                                                     | 7.70  | 1 | 5  | 20 | 73  | 0.654 | 4.352 | 3.662 | 0.945 | 147.63 | 7.70  | 30 | 73  | 2390 | 271.2 | 6.11 |
| Q12981 | OS=Homo<br>sapiens<br>GN=BNIP1<br>PE=1 SV=3 -<br>[SEC20_HUMAN<br>SEC23-<br>interacting<br>protein<br>OS=Homo<br>sapiens<br>GN=SEC23IP<br>PE=1 SV=1 -<br>[S23IP_HUMAN<br>]<br>Aspartyl<br>aminopeptidas<br>e OS=Homo<br>sapiens<br>GN=DNPEP<br>PE=1 SV=1 -<br>[DNPEP_HUMAN<br>]<br>Serine/threoni<br>ne-protein<br>kinase B-raf<br>OS=Homo<br>sapiens<br>GN=BRAF<br>PE=1 SV=4 -<br>[BRAF_HUMAN]<br>TBC1 domain<br>family member<br>5 OS=Homo<br>sapiens<br>GN=TBC1D5<br>PE=1 SV=1 -<br>[TBCD5_HUMAN<br>]<br>ELMO domain-<br>containing<br>protein 2<br>OS=Homo<br>sapiens<br>GN=ELMOD2<br>PE=1 SV=1 -<br>[ELMD2_HUMAN<br>]                                                                                                                                                                                                                                                                                                                                                                                                                                                     | 25.88 | 1 | 6  | 6  | 9   | 1.020 | 1.003 | 0.928 | 0.945 | 16.41  | 25.88 | 7  | 9   | 228  | 26.1  | 8.95 |
| Q9Y6Y8 | OS=Homo<br>sapiens<br>GN=SEC23IP<br>PE=1 SV=1 -<br>[S23IP_HUMAN<br>]<br>Aspartyl<br>aminopeptidas<br>e OS=Homo<br>sapiens<br>GN=DNPEP<br>PE=1 SV=1 -<br>[DNPEP_HUMAN<br>]<br>Serine/threoni<br>ne-protein<br>kinase B-raf<br>OS=Homo<br>sapiens<br>GN=BRAF<br>PE=1 SV=4 -<br>[BRAF_HUMAN]<br>TBC1 domain<br>family member<br>5 OS=Homo<br>sapiens<br>GN=TBC1D5<br>PE=1 SV=1 -<br>[TBCD5_HUMAN<br>]<br>ELMO domain-<br>containing<br>protein 2<br>OS=Homo<br>sapiens<br>GN=ELMOD2<br>PE=1 SV=1 -<br>[ELMD2_HUMAN<br>]                                                                                                                                                                                                                                                                                                                                                                                                                                                                                                                                                          | 29.40 | 1 | 26 | 27 | 139 | 0.833 | 1.013 | 0.913 | 0.945 | 340.09 | 29.40 | 47 | 139 | 1000 | 111.0 | 5.54 |
| Q9UUA0 | OS=Homo<br>sapiens<br>GN=DNPEP<br>PE=1 SV=1 -<br>[DNPEP_HUMAN<br>]<br>Serine/threoni<br>ne-protein<br>kinase B-raf<br>OS=Homo<br>sapiens<br>GN=BRAF<br>PE=1 SV=4 -<br>[BRAF_HUMAN]<br>TBC1 domain<br>family member<br>5 OS=Homo<br>sapiens<br>GN=TBC1D5<br>PE=1 SV=1 -<br>[TBCD5_HUMAN<br>]<br>ELMO domain-<br>containing<br>protein 2<br>OS=Homo<br>sapiens<br>GN=ELMOD2<br>PE=1 SV=1 -<br>[ELMD2_HUMAN<br>]                                                                                                                                                                                                                                                                                                                                                                                                                                                                                                                                                                                                                                                                 | 34.74 | 1 | 13 | 13 | 46  | 1.027 | 0.935 | 0.789 | 0.945 | 115.51 | 34.74 | 21 | 46  | 475  | 52.4  | 7.42 |
| P15056 | OS=Homo<br>sapiens<br>GN=BRAF<br>PE=1 SV=4 -<br>[BRAF_HUMAN]<br>TBC1 domain<br>family member<br>5 OS=Homo<br>sapiens<br>GN=TBC1D5<br>PE=1 SV=1 -<br>[TBCD5_HUMAN<br>]<br>ELMO domain-<br>containing<br>protein 2<br>OS=Homo<br>sapiens<br>GN=ELMOD2<br>PE=1 SV=1 -<br>[ELMD2_HUMAN<br>]                                                                                                                                                                                                                                                                                                                                                                                                                                                                                                                                                                                                                                                                                                                                                                                       | 2.61  | 1 | 1  | 2  | 5   | 1.232 | 0.665 | 0.765 | 0.945 | 12.56  | 2.61  | 4  | 5   | 766  | 84.4  | 7.53 |
| Q92609 | OS=Homo<br>sapiens<br>GN=TBC1D5<br>PE=1 SV=1 -<br>[TBCD5_HUMAN<br>]<br>ELMO domain-<br>containing<br>protein 2<br>OS=Homo<br>sapiens<br>GN=ELMOD2<br>PE=1 SV=1 -<br>[ELMD2_HUMAN<br>]                                                                                                                                                                                                                                                                                                                                                                                                                                                                                                                                                                                                                                                                                                                                                                                                                                                                                         | 13.96 | 1 | 8  | 8  | 24  | 0.810 | 1.065 | 1.009 | 0.945 | 70.18  | 13.96 | 10 | 24  | 795  | 88.9  | 6.54 |
| Q8IZ81 | OS=Homo<br>sapiens<br>GN=ELMOD2<br>PE=1 SV=1 -<br>[ELMD2_HUMAN<br>]                                                                                                                                                                                                                                                                                                                                                                                                                                                                                                                                                                                                                                                                                                                                                                                                                                                                                                                                                                                                           | 17.06 | 1 | 5  | 5  | 13  | 1.025 | 0.799 | 0.833 | 0.945 | 28.23  | 17.06 | 7  | 13  | 293  | 34.9  | 8.05 |



|        |                                                                                                              |       |   |    |    |     |       |       |       |       |        |       |    |     |      |       |      |
|--------|--------------------------------------------------------------------------------------------------------------|-------|---|----|----|-----|-------|-------|-------|-------|--------|-------|----|-----|------|-------|------|
| P28288 | ATP-binding cassette sub-family D member 3<br>OS=Homo sapiens<br>GN=ABCD3<br>PE=1 SV=1 - [ABCD3_HUMAN]       | 28.22 | 4 | 20 | 22 | 88  | 1.088 | 0.723 | 0.954 | 0.945 | 213.19 | 28.22 | 34 | 88  | 659  | 75.4  | 9.36 |
| Q9BR76 | Coronin-1B<br>OS=Homo sapiens<br>GN=CORO1B<br>PE=1 SV=1 - [CORO1B_HUMAN]                                     | 37.01 | 2 | 15 | 15 | 83  | 1.005 | 0.941 | 1.054 | 0.945 | 197.31 | 37.01 | 26 | 83  | 489  | 54.2  | 5.88 |
| Q9NQP4 | Prefoldin subunit 4<br>OS=Homo sapiens<br>GN=PFDN4<br>PE=1 SV=1 - [PFD4_HUMAN]                               | 47.01 | 1 | 7  | 7  | 85  | 0.807 | 1.114 | 1.049 | 0.945 | 244.28 | 47.01 | 10 | 85  | 134  | 15.3  | 4.53 |
| Q5S007 | Leucine-rich repeat serine/threonine kinase 2<br>OS=Homo sapiens<br>GN=LRRK2<br>PE=1 SV=2 - [LRRK2_HUMAN]    | 2.22  | 1 | 6  | 7  | 12  | 0.862 | 0.341 | 0.500 | 0.946 | 17.63  | 2.22  | 8  | 12  | 2527 | 285.9 | 6.80 |
| P21281 | V-type proton ATPase subunit B, brain isoform<br>OS=Homo sapiens<br>GN=ATP6V1B2<br>PE=1 SV=3 - [VATB2_HUMAN] | 42.86 | 2 | 17 | 17 | 60  | 0.979 | 0.998 | 0.871 | 0.946 | 153.78 | 42.86 | 30 | 60  | 511  | 56.5  | 5.81 |
| Q9UN86 | Ras GTPase-activating protein-binding protein 2<br>OS=Homo sapiens<br>GN=G3BP2<br>PE=1 SV=2 - [G3BP2_HUMAN]  | 24.27 | 1 | 11 | 13 | 58  | 0.952 | 0.953 | 0.985 | 0.946 | 118.60 | 24.27 | 20 | 58  | 482  | 54.1  | 5.55 |
| Q8WXH2 | Junctophilin-3<br>OS=Homo sapiens<br>GN=JPH3 PE=1 SV=2 - [JPH3_HUMAN]                                        | 0.80  | 1 | 1  | 1  | 2   | 0.880 | 0.717 | 0.718 | 0.946 | 4.33   | 0.80  | 1  | 2   | 748  | 81.4  | 9.39 |
| P20337 | Ras-related protein Rab-3B<br>OS=Homo sapiens<br>GN=RAB3B<br>PE=1 SV=2 - [RAB3B_HUMAN]                       | 48.86 | 5 | 5  | 10 | 126 | 0.838 | 0.744 | 0.820 | 0.946 | 302.70 | 48.86 | 18 | 126 | 219  | 24.7  | 5.02 |
| Q8IWI9 | Codanin-1<br>OS=Homo sapiens<br>GN=CDAN1<br>PE=1 SV=4 - [CDAN1_HUMAN]                                        | 1.79  | 1 | 2  | 2  | 9   | 0.849 | 0.801 | 1.028 | 0.946 | 0.00   | 1.79  | 2  | 9   | 1227 | 134.0 | 6.77 |

|        |                                                                                                                       |       |   |    |    |    |       |       |       |       |        |       |    |    |      |       |      |
|--------|-----------------------------------------------------------------------------------------------------------------------|-------|---|----|----|----|-------|-------|-------|-------|--------|-------|----|----|------|-------|------|
| Q9HCP6 | Protein-cysteine N-palmitoyltransferase HHAT-like protein<br>OS=Homo sapiens<br>GN=HHATL<br>PE=2 SV=1 - [HHATL_HUMAN] | 7.14  | 1 | 2  | 2  | 5  | 1.197 | 0.169 | 0.240 | 0.946 | 6.58   | 7.14  | 2  | 5  | 504  | 56.7  | 7.12 |
| Q9H694 | Protein bicaudal C homolog 1<br>OS=Homo sapiens<br>GN=BICC1<br>PE=1 SV=2 - [BICC1_HUMAN]                              | 6.67  | 1 | 5  | 5  | 12 | 0.649 | 0.859 | 0.765 | 0.946 | 34.23  | 6.67  | 8  | 12 | 974  | 104.8 | 8.54 |
| P63000 | Ras-related C3 botulinum toxin substrate 1<br>OS=Homo sapiens<br>GN=RAC1<br>PE=1 SV=1 - [RAC1_HUMAN]                  | 44.79 | 3 | 6  | 11 | 95 | 1.477 | 1.015 | 1.028 | 0.946 | 244.71 | 44.79 | 20 | 95 | 192  | 21.4  | 8.50 |
| Q9Y5S9 | RNA-binding protein 8A<br>OS=Homo sapiens<br>GN=RBM8A<br>PE=1 SV=1 - [RBM8A_HUMAN]                                    | 16.09 | 1 | 4  | 4  | 14 | 0.893 | 0.784 | 0.636 | 0.946 | 35.57  | 16.09 | 7  | 14 | 174  | 19.9  | 5.72 |
| Q5VW36 | Focadhesin<br>OS=Homo sapiens<br>GN=FOCAD<br>PE=1 SV=1 - [FOCAD_HUMAN]                                                | 7.94  | 1 | 13 | 14 | 25 | 0.920 | 0.915 | 1.046 | 0.947 | 58.12  | 7.94  | 19 | 25 | 1801 | 199.9 | 6.62 |
| O75030 | Microphthalmia-associated transcription factor<br>OS=Homo sapiens<br>GN=MITF<br>PE=1 SV=2 - [MITF_HUMAN]              | 11.03 | 3 | 3  | 5  | 8  | 0.689 | 1.634 | 1.081 | 0.947 | 12.76  | 11.03 | 7  | 8  | 526  | 58.8  | 6.33 |
| Q8N543 | Prolyl 3-hydroxylase<br>OGFOD1<br>OS=Homo sapiens<br>GN=OGFOD1<br>PE=1 SV=1 - [OGFD1_HUMAN]                           | 3.32  | 1 | 1  | 1  | 1  | 1.064 | 0.960 | 1.326 | 0.947 | 4.46   | 3.32  | 1  | 1  | 542  | 63.2  | 5.11 |
| Q7L3B6 | Hsp90 co-chaperone Cdc37-like 1<br>OS=Homo sapiens<br>GN=CDC37L1<br>PE=1 SV=1 - [CD37L_HUMAN]                         | 14.24 | 1 | 4  | 4  | 5  | 0.719 | 0.979 | 1.149 | 0.947 | 9.13   | 14.24 | 5  | 5  | 337  | 38.8  | 5.34 |
| O75864 | Protein phosphatase 1 regulatory subunit 37<br>OS=Homo sapiens<br>GN=PPP1R37<br>PE=1 SV=4 - [PPR37_HUMAN]             | 2.17  | 1 | 2  | 2  | 2  | 1.008 | 1.092 | 1.274 | 0.947 | 2.41   | 2.17  | 2  | 2  | 691  | 74.7  | 5.06 |

|        |                                                                                                                                                                                                                     |       |   |   |    |    |       |       |       |       |       |       |    |    |      |       |      |
|--------|---------------------------------------------------------------------------------------------------------------------------------------------------------------------------------------------------------------------|-------|---|---|----|----|-------|-------|-------|-------|-------|-------|----|----|------|-------|------|
| Q5W0Z9 | Probable<br>palmitoyltransf<br>erase ZDHHC20<br>OS=Homo<br>sapiens<br>GN=ZDHHC20<br>PE=1 SV=1 -<br>[ZDH20_HUMAN<br>]<br>ATP-binding<br>cassette sub-<br>family A<br>member 7                                        | 3.01  | 1 | 1 | 1  | 3  | 1.140 | 0.664 | 0.598 | 0.947 | 8.87  | 3.01  | 2  | 3  | 365  | 42.2  | 7.71 |
| Q8IZY2 | OS=Homo<br>sapiens<br>GN=ABCA7<br>PE=1 SV=3 -<br>[ABCA7_HUMAN<br>]                                                                                                                                                  | 2.00  | 1 | 2 | 2  | 2  | 0.649 | 0.963 | 1.123 | 0.947 | 2.74  | 2.00  | 2  | 2  | 2146 | 234.2 | 7.24 |
| Q9Y2K2 | Serine/threoni<br>ne-protein<br>kinase SIK3<br>OS=Homo<br>sapiens<br>GN=SIK3 PE=1<br>SV=3 -<br>[SIK3_HUMAN]                                                                                                         | 0.55  | 1 | 1 | 1  | 2  | 0.374 | 0.983 | 0.927 | 0.947 | 4.11  | 0.55  | 1  | 2  | 1263 | 139.9 | 6.70 |
| Q9H4L7 | SWI/SNF-<br>related matrix-<br>associated<br>actin-<br>dependent<br>regulator of<br>chromatin<br>subfamily A<br>containing<br>DEAD/H box 1<br>OS=Homo<br>sapiens<br>GN=SMARCAD1<br>PE=1 SV=2 -<br>[SMRCD_HUMA<br>N] | 0.78  | 1 | 1 | 1  | 1  | 1.696 | 0.881 | 1.434 | 0.947 | 2.09  | 0.78  | 1  | 1  | 1026 | 117.3 | 5.55 |
| Q9NY59 | Sphingomyelin<br>phosphodiester<br>ase 3<br>OS=Homo<br>sapiens<br>GN=SMPD3<br>PE=1 SV=1 -<br>[NSMA2_HUMA<br>N]                                                                                                      | 3.66  | 1 | 2 | 2  | 2  | 0.865 | 0.716 | 0.850 | 0.947 | 2.45  | 3.66  | 2  | 2  | 655  | 71.0  | 5.78 |
| Q8NBJ4 | Golgi<br>membrane<br>protein 1<br>OS=Homo<br>sapiens<br>GN=GOLM1<br>PE=1 SV=1 -<br>[GOLM1_HUMA<br>N]                                                                                                                | 23.44 | 2 | 9 | 10 | 27 | 0.618 | 1.195 | 0.837 | 0.948 | 55.00 | 23.44 | 15 | 27 | 401  | 45.3  | 4.97 |
| Q9H3F6 | BTB/POZ<br>domain-<br>containing<br>adapter for<br>CUL3-mediated<br>RhoA<br>degradation<br>protein 3<br>OS=Homo<br>sapiens<br>GN=KCTD10<br>PE=1 SV=1 -<br>[BACD3_HUMAN<br>]                                         | 14.70 | 3 | 4 | 4  | 9  | 0.978 | 0.638 | 0.729 | 0.948 | 18.27 | 14.70 | 6  | 9  | 313  | 35.4  | 6.34 |

|        |                                                                                                                        |       |   |    |    |    |       |       |       |       |        |       |    |    |     |      |      |
|--------|------------------------------------------------------------------------------------------------------------------------|-------|---|----|----|----|-------|-------|-------|-------|--------|-------|----|----|-----|------|------|
| Q8TAT6 | Nuclear protein localization protein 4 homolog<br>OS=Homo sapiens<br>GN=NPLOC4<br>PE=1 SV=3 - [NPLOC4_HUMAN]           | 28.78 | 1 | 16 | 17 | 47 | 1.241 | 0.899 | 1.461 | 0.948 | 129.77 | 28.78 | 27 | 47 | 608 | 68.1 | 6.38 |
| Q8N4A0 | Polypeptide N-acetylgalactosamine 4 O-sialyltransferase<br>OS=Homo sapiens<br>GN=GALNT4<br>PE=1 SV=2 - [GALNT4_HUMAN]  | 10.21 | 1 | 4  | 6  | 15 | 0.945 | 0.849 | 1.281 | 0.948 | 34.96  | 10.21 | 8  | 15 | 578 | 66.6 | 7.61 |
| P01130 | Low-density lipoprotein receptor<br>OS=Homo sapiens<br>GN=LDLR PE=1 SV=1 - [LDLR_HUMAN]                                | 10.35 | 1 | 7  | 8  | 21 | 0.766 | 0.643 | 1.941 | 0.948 | 40.38  | 10.35 | 13 | 21 | 860 | 95.3 | 5.05 |
| Q9UBU8 | Mortality factor 4-like protein 1<br>OS=Homo sapiens<br>GN=MORF4L1<br>PE=1 SV=2 - [MORF4L1_HUMAN]                      | 4.97  | 1 | 2  | 2  | 3  | 0.849 | 0.996 | 0.990 | 0.948 | 8.52   | 4.97  | 2  | 3  | 362 | 41.4 | 9.28 |
| Q9H492 | Microtubule-associated proteins 1A/1B light chain 3A<br>OS=Homo sapiens<br>GN=MAP1LC3A<br>PE=1 SV=2 - [MAP1LC3A_HUMAN] | 24.79 | 1 | 1  | 4  | 10 | 0.573 | 0.896 | 1.334 | 0.948 | 6.32   | 24.79 | 7  | 10 | 121 | 14.3 | 8.68 |
| Q86TB9 | Protein PAT1 homolog 1<br>OS=Homo sapiens<br>GN=PATL1<br>PE=1 SV=2 - [PATL1_HUMAN]                                     | 6.36  | 1 | 4  | 4  | 8  | 1.647 | 1.299 | 1.187 | 0.948 | 13.37  | 6.36  | 6  | 8  | 770 | 86.8 | 6.67 |
| A6NDG6 | Phosphoglycolate phosphatase<br>OS=Homo sapiens<br>GN=PGP PE=1 SV=1 - [PGP_HUMAN]                                      | 27.10 | 1 | 8  | 8  | 18 | 1.178 | 1.186 | 1.057 | 0.948 | 39.90  | 27.10 | 14 | 18 | 321 | 34.0 | 6.14 |
| Q9NR31 | GTP-binding protein SAR1a<br>OS=Homo sapiens<br>GN=SAR1A<br>PE=1 SV=1 - [SAR1A_HUMAN]                                  | 35.86 | 1 | 4  | 7  | 37 | 1.227 | 0.698 | 1.076 | 0.948 | 102.70 | 35.86 | 12 | 37 | 198 | 22.4 | 6.68 |
| Q8NC54 | Keratinocyte-associated transmembrane protein 2<br>OS=Homo sapiens<br>GN=KCT2<br>PE=2 SV=2 - [KCT2_HUMAN]              | 3.77  | 1 | 1  | 1  | 3  | 1.046 | 0.628 | 0.485 | 0.948 | 7.44   | 3.77  | 2  | 3  | 265 | 29.2 | 5.08 |

|        |                                                                                                                |       |   |    |    |     |       |       |       |       |         |       |    |     |      |       |      |
|--------|----------------------------------------------------------------------------------------------------------------|-------|---|----|----|-----|-------|-------|-------|-------|---------|-------|----|-----|------|-------|------|
| Q15654 | Thyroid receptor-interacting protein 6<br>OS=Homo sapiens<br>GN=TRIP6<br>PE=1 SV=3 - [TRIP6_HUMAN]             | 23.95 | 1 | 7  | 7  | 38  | 1.136 | 1.047 | 1.102 | 0.948 | 147.17  | 23.95 | 13 | 38  | 476  | 50.3  | 7.37 |
| Q9H098 | Protein FAM107B<br>OS=Homo sapiens<br>GN=FAM107B<br>PE=1 SV=1 - [F107B_HUMAN]                                  | 24.43 | 1 | 3  | 3  | 9   | 1.672 | 0.504 | 1.217 | 0.948 | 16.92   | 24.43 | 5  | 9   | 131  | 15.5  | 8.29 |
| Q9H1E5 | Thioredoxin-related transmembrane protein 4<br>OS=Homo sapiens<br>GN=TMX4<br>PE=1 SV=1 - [TMX4_HUMAN]          | 3.44  | 1 | 1  | 1  | 4   | 1.300 | 1.248 | 1.217 | 0.948 | 8.41    | 3.44  | 2  | 4   | 349  | 38.9  | 4.37 |
| P22314 | Ubiquitin-like modifier-activating enzyme 1<br>OS=Homo sapiens<br>GN=UBA1<br>PE=1 SV=3 - [UBA1_HUMAN]          | 48.58 | 1 | 42 | 43 | 539 | 1.017 | 1.046 | 1.096 | 0.949 | 1329.76 | 48.58 | 74 | 539 | 1058 | 117.8 | 5.76 |
| Q96QR8 | Transcriptional activator protein Pur-beta<br>OS=Homo sapiens<br>GN=PURB<br>PE=1 SV=3 - [PURB_HUMAN]           | 25.00 | 2 | 6  | 9  | 27  | 1.140 | 0.886 | 0.842 | 0.949 | 74.69   | 25.00 | 13 | 27  | 312  | 33.2  | 5.43 |
| Q7Z3C6 | Autophagy-related protein 9A<br>OS=Homo sapiens<br>GN=ATG9A<br>PE=1 SV=3 - [ATG9A_HUMAN]                       | 5.72  | 1 | 5  | 5  | 7   | 1.110 | 0.842 | 0.870 | 0.949 | 13.74   | 5.72  | 6  | 7   | 839  | 94.4  | 6.67 |
| Q9H910 | Hematological and neurological expressed 1-like protein<br>OS=Homo sapiens<br>GN=HN1L PE=1 SV=1 - [HN1L_HUMAN] | 52.63 | 1 | 7  | 7  | 33  | 0.967 | 1.276 | 1.171 | 0.949 | 91.88   | 52.63 | 13 | 33  | 190  | 20.1  | 9.26 |
| Q8WTT2 | Nucleolar complex protein 3 homolog<br>OS=Homo sapiens<br>GN=NOC3L<br>PE=1 SV=1 - [NOC3L_HUMAN]                | 11.88 | 1 | 10 | 10 | 24  | 0.714 | 0.953 | 0.798 | 0.949 | 62.60   | 11.88 | 16 | 24  | 800  | 92.5  | 9.17 |

|        |                                                                                                                                                           |       |   |    |    |     |       |       |       |       |        |       |    |     |      |       |      |
|--------|-----------------------------------------------------------------------------------------------------------------------------------------------------------|-------|---|----|----|-----|-------|-------|-------|-------|--------|-------|----|-----|------|-------|------|
| P27037 | Activin receptor<br>type-2A<br>OS=Homo<br>sapiens<br>GN=ACVR2A<br>PE=1 SV=1 -<br>[AVR2A_HUMAN<br>]                                                        | 3.12  | 1 | 1  | 1  | 1   | 0.691 | 1.338 | 1.884 | 0.949 | 0.00   | 3.12  | 1  | 1   | 513  | 57.8  | 5.92 |
| O95373 | Importin-7<br>OS=Homo<br>sapiens<br>GN=IPO7<br>PE=1 SV=1 -<br>[IPO7_HUMAN]                                                                                | 13.49 | 1 | 12 | 12 | 57  | 0.809 | 0.742 | 0.884 | 0.949 | 115.54 | 13.49 | 22 | 57  | 1038 | 119.4 | 4.82 |
| Q9NWS0 | PIH1 domain-<br>containing<br>protein 1<br>OS=Homo<br>sapiens<br>GN=PIHD1<br>PE=1 SV=1 -<br>[PIHD1_HUMAN<br>]                                             | 21.03 | 1 | 4  | 4  | 15  | 0.835 | 1.183 | 1.109 | 0.949 | 40.39  | 21.03 | 7  | 15  | 290  | 32.3  | 5.14 |
| P50991 | T-complex<br>protein 1<br>subunit delta<br>OS=Homo<br>sapiens<br>GN=CCT4<br>PE=1 SV=4 -<br>[TCPD_HUMAN]                                                   | 61.78 | 1 | 30 | 31 | 224 | 0.911 | 0.879 | 1.011 | 0.949 | 544.06 | 61.78 | 52 | 224 | 539  | 57.9  | 7.83 |
| Q16134 | Electron<br>transfer<br>flavoprotein-<br>ubiquinone<br>oxidoreductase<br>, mitochondrial<br>OS=Homo<br>sapiens<br>GN=ETFDH<br>PE=1 SV=2 -<br>[ETFD_HUMAN] | 23.18 | 1 | 13 | 13 | 52  | 0.737 | 0.985 | 0.989 | 0.949 | 134.40 | 23.18 | 22 | 52  | 617  | 68.5  | 7.55 |
| Q9Y239 | Nucleotide-<br>binding<br>oligomerization<br>domain-<br>containing<br>protein 1<br>OS=Homo<br>sapiens<br>GN=NOD1<br>PE=1 SV=1 -<br>[NOD1_HUMAN]           | 0.73  | 1 | 1  | 1  | 1   | 1.667 | 1.707 | 1.182 | 0.949 | 0.00   | 0.73  | 1  | 1   | 953  | 107.6 | 7.11 |
| P10606 | Cytochrome c<br>oxidase subunit<br>5B,<br>mitochondrial<br>OS=Homo<br>sapiens<br>GN=COX5B<br>PE=1 SV=2 -<br>[COX5B_HUMA<br>N]                             | 51.16 | 1 | 9  | 9  | 56  | 0.930 | 1.105 | 0.920 | 0.949 | 129.11 | 51.16 | 16 | 56  | 129  | 13.7  | 8.81 |
| O60739 | Eukaryotic<br>translation<br>initiation factor<br>1b OS=Homo<br>sapiens<br>GN=EIF1B<br>PE=1 SV=2 -<br>[EIF1B_HUMAN<br>]                                   | 51.33 | 2 | 6  | 6  | 35  | 0.843 | 0.911 | 1.175 | 0.949 | 130.40 | 51.33 | 7  | 35  | 113  | 12.8  | 7.37 |

|        |                                                                                                  |       |   |    |    |    |       |       |       |       |        |       |    |    |      |       |      |
|--------|--------------------------------------------------------------------------------------------------|-------|---|----|----|----|-------|-------|-------|-------|--------|-------|----|----|------|-------|------|
| Q9BXT5 | Testis-expressed sequence 15 protein<br>OS=Homo sapiens<br>GN=TEX15<br>PE=2 SV=2 - [TEX15_HUMAN] | 3.41  | 2 | 3  | 6  | 14 | 1.306 | 0.491 | 1.784 | 0.949 | 21.80  | 3.41  | 7  | 14 | 2789 | 315.1 | 6.19 |
| Q13617 | Cullin-2<br>OS=Homo sapiens<br>GN=CUL2 PE=1<br>SV=2 - [CUL2_HUMAN]                               | 18.52 | 1 | 14 | 15 | 34 | 1.058 | 0.943 | 1.034 | 0.949 | 71.35  | 18.52 | 20 | 34 | 745  | 86.9  | 6.92 |
| P32929 | Cystathionine gamma-lyase<br>OS=Homo sapiens<br>GN=CTH PE=1<br>SV=3 - [CGL_HUMAN]                | 2.22  | 1 | 1  | 1  | 1  | 0.831 | 1.783 | 2.132 | 0.950 | 2.26   | 2.22  | 1  | 1  | 405  | 44.5  | 6.70 |
| P50402 | Emerin<br>OS=Homo sapiens<br>GN=EMD PE=1<br>SV=1 - [EMD_HUMAN]                                   | 42.52 | 1 | 10 | 10 | 61 | 0.933 | 1.279 | 1.283 | 0.950 | 146.75 | 42.52 | 18 | 61 | 254  | 29.0  | 5.50 |
| Q9NVR0 | Kelch-like protein 11<br>OS=Homo sapiens<br>GN=KLHL11<br>PE=1 SV=1 - [KLHL1_HUMAN]               | 1.13  | 1 | 1  | 1  | 1  | 0.736 | 1.037 | 0.900 | 0.950 | 1.88   | 1.13  | 1  | 1  | 708  | 80.1  | 6.16 |
| Q8NFK1 | Gap junction gamma-3 protein<br>OS=Homo sapiens<br>GN=GJC3 PE=2<br>SV=1 - [CXG3_HUMAN]           | 6.09  | 1 | 1  | 2  | 2  | 0.488 | 0.563 | 1.050 | 0.950 | 3.82   | 6.09  | 2  | 2  | 279  | 31.3  | 9.17 |
| Q4G148 | Glucoside xylosyltransferase 1<br>OS=Homo sapiens<br>GN=GXYLT1<br>PE=1 SV=2 - [GXLT1_HUMAN]      | 7.95  | 1 | 3  | 3  | 10 | 0.708 | 0.877 | 0.662 | 0.950 | 16.78  | 7.95  | 6  | 10 | 440  | 50.5  | 8.65 |
| Q9NRM1 | Enamelin<br>OS=Homo sapiens<br>GN=ENAM<br>PE=2 SV=3 - [ENAM_HUMAN]                               | 0.96  | 1 | 1  | 1  | 2  | 0.531 | 3.093 | 5.997 | 0.950 | 5.98   | 0.96  | 1  | 2  | 1142 | 128.7 | 6.83 |
| Q8NGP4 | Olfactory receptor 5M3<br>OS=Homo sapiens<br>GN=OR5M3<br>PE=2 SV=2 - [OR5M3_HUMAN]               | 2.93  | 1 | 1  | 1  | 1  | 1.222 | 1.384 | 0.950 | 0.950 | 2.26   | 2.93  | 1  | 1  | 307  | 35.1  | 9.03 |
| Q8WUB8 | PHD finger protein 10<br>OS=Homo sapiens<br>GN=PHF10<br>PE=1 SV=3 - [PHF10_HUMAN]                | 4.62  | 1 | 2  | 2  | 5  | 1.156 | 1.043 | 0.478 | 0.950 | 16.76  | 4.62  | 3  | 5  | 498  | 56.0  | 6.62 |

|        |                                                                                                                                                                                         |       |   |    |    |     |       |       |       |       |        |       |    |     |      |       |      |
|--------|-----------------------------------------------------------------------------------------------------------------------------------------------------------------------------------------|-------|---|----|----|-----|-------|-------|-------|-------|--------|-------|----|-----|------|-------|------|
| Q8TCDS | 5'(3')-<br>deoxyribonucle<br>otidase,<br>cytosolic type<br>OS=Homo<br>sapiens<br>GN=NT5C<br>PE=1 SV=2 -<br>[NT5C_HUMAN]<br>Carnitine O-<br>palmitoyltransf<br>erase 1, liver<br>isoform | 50.75 | 1 | 8  | 8  | 20  | 1.477 | 0.912 | 1.064 | 0.950 | 51.82  | 50.75 | 13 | 20  | 201  | 23.4  | 6.64 |
| P50416 | OS=Homo<br>sapiens<br>GN=CPT1A<br>PE=1 SV=2 -<br>[CPT1A_HUMAN]<br>Acyl-CoA<br>synthetase<br>short-chain<br>family member<br>3,                                                          | 24.45 | 1 | 17 | 17 | 88  | 1.021 | 1.017 | 0.923 | 0.950 | 231.66 | 24.45 | 24 | 88  | 773  | 88.3  | 8.65 |
| Q9H6R3 | mitochondrial<br>OS=Homo<br>sapiens<br>GN=ACSS3<br>PE=1 SV=1 -<br>[ACSS3_HUMAN]<br>Malate<br>dehydrogenase<br>, cytoplasmic                                                             | 12.97 | 1 | 8  | 8  | 16  | 0.657 | 0.828 | 0.564 | 0.950 | 40.71  | 12.97 | 13 | 16  | 686  | 74.7  | 8.63 |
| P40925 | OS=Homo<br>sapiens<br>GN=MDH1<br>PE=1 SV=4 -<br>[MDHC_HUMAN]<br>Uncharacterize<br>d protein<br>KIAA2013                                                                                 | 56.29 | 1 | 22 | 23 | 262 | 1.100 | 1.175 | 0.971 | 0.950 | 558.19 | 56.29 | 37 | 262 | 334  | 36.4  | 7.36 |
| Q8IYS2 | OS=Homo<br>sapiens<br>GN=KIAA2013<br>PE=2 SV=1 -<br>[K2013_HUMAN]<br>Sperm protein<br>associated with<br>the nucleus on<br>the X<br>chromosome                                          | 14.04 | 1 | 6  | 6  | 12  | 0.830 | 0.949 | 0.913 | 0.951 | 37.07  | 14.04 | 10 | 12  | 634  | 69.1  | 8.19 |
| Q5MJ10 | N2 OS=Homo<br>sapiens<br>GN=SPANXN2<br>PE=2 SV=1 -<br>[SPXN2_HUMAN]<br>Formin-binding<br>protein 1                                                                                      | 4.44  | 1 | 1  | 1  | 2   | 0.414 | 0.656 | 0.810 | 0.951 | 1.63   | 4.44  | 1  | 2   | 180  | 19.9  | 3.98 |
| Q96RU3 | OS=Homo<br>sapiens<br>GN=FNBP1<br>PE=1 SV=2 -<br>[FNBP1_HUMAN]<br>Protein<br>FAM83H                                                                                                     | 20.58 | 1 | 14 | 14 | 43  | 1.188 | 1.171 | 1.179 | 0.951 | 95.92  | 20.58 | 20 | 43  | 617  | 71.3  | 5.72 |
| Q6ZRV2 | OS=Homo<br>sapiens<br>GN=FAM83H<br>PE=1 SV=3 -<br>[FA83H_HUMAN]<br>]                                                                                                                    | 3.39  | 1 | 2  | 3  | 3   | 1.145 | 0.927 | 1.439 | 0.951 | 5.09   | 3.39  | 3  | 3   | 1179 | 127.0 | 6.98 |



|        |                                                                                                                                                                                                                               |       |   |    |    |     |       |       |       |       |        |       |    |     |      |       |      |
|--------|-------------------------------------------------------------------------------------------------------------------------------------------------------------------------------------------------------------------------------|-------|---|----|----|-----|-------|-------|-------|-------|--------|-------|----|-----|------|-------|------|
| Q8TBH0 | Arrestin domain-containing protein 2<br>OS=Homo sapiens<br>GN=ARRDC2<br>PE=2 SV=2 - [ARRD2_HUMAN<br>Metallo-beta-lactamase domain-containing protein 2                                                                        | 11.55 | 1 | 2  | 2  | 2   | 3.101 | 1.861 | 1.502 | 0.951 | 5.25   | 11.55 | 2  | 2   | 407  | 44.4  | 9.20 |
| Q68D91 | OS=Homo sapiens<br>GN=MBLAC2<br>PE=1 SV=3 - [MBLC2_HUMAN<br>] cTAGE family member 15<br>OS=Homo sapiens<br>GN=CTAGE15<br>PE=2 SV=1 - [CTGEF_HUMAN<br>] Regulatory-associated protein of mTOR                                  | 27.24 | 1 | 6  | 6  | 17  | 0.856 | 0.751 | 0.918 | 0.951 | 43.25  | 27.24 | 9  | 17  | 279  | 31.4  | 6.92 |
| A4D2H0 | OS=Homo sapiens<br>GN=CTAGE15<br>PE=2 SV=1 - [CTGEF_HUMAN<br>] Regulatory-associated protein of mTOR                                                                                                                          | 2.45  | 5 | 1  | 2  | 9   | 0.676 | 0.525 | 0.848 | 0.952 | 15.12  | 2.45  | 2  | 9   | 777  | 87.8  | 5.24 |
| Q8N122 | OS=Homo sapiens<br>GN=RPTOR<br>PE=1 SV=1 - [RPTOR_HUMAN<br>] Clathrin light chain A<br>OS=Homo sapiens<br>GN=CLTA PE=1 SV=1 - [CLCA_HUMAN]                                                                                    | 7.79  | 1 | 9  | 9  | 19  | 0.886 | 1.027 | 1.017 | 0.952 | 39.52  | 7.79  | 13 | 19  | 1335 | 148.9 | 6.89 |
| P09496 | OS=Homo sapiens<br>GN=CLTA PE=1 SV=1 - [CLCA_HUMAN]                                                                                                                                                                           | 27.42 | 1 | 11 | 12 | 133 | 0.983 | 0.971 | 0.948 | 0.952 | 276.20 | 27.42 | 18 | 133 | 248  | 27.1  | 4.51 |
| Q53GT1 | Kelch-like protein 22<br>OS=Homo sapiens<br>GN=KLHL22<br>PE=1 SV=2 - [KLH22_HUMAN<br>] NADH dehydrogenase [ubiquinone] 1 alpha subcomplex assembly factor 3<br>OS=Homo sapiens<br>GN=NDUFAF3<br>PE=1 SV=1 - [NDUF3_HUMAN<br>] | 2.37  | 1 | 1  | 1  | 2   | 0.688 | 0.936 | 0.990 | 0.952 | 5.68   | 2.37  | 1  | 2   | 634  | 71.6  | 5.49 |
| Q9BU61 | OS=Homo sapiens<br>GN=NDUFAF3<br>PE=1 SV=1 - [NDUF3_HUMAN<br>]                                                                                                                                                                | 18.48 | 1 | 3  | 3  | 20  | 1.052 | 0.798 | 1.054 | 0.952 | 49.82  | 18.48 | 5  | 20  | 184  | 20.3  | 8.22 |
| P63220 | 40S ribosomal protein S21<br>OS=Homo sapiens<br>GN=RPS21<br>PE=1 SV=1 - [RS21_HUMAN]                                                                                                                                          | 50.60 | 1 | 6  | 6  | 77  | 0.799 | 0.969 | 0.900 | 0.952 | 164.68 | 50.60 | 9  | 77  | 83   | 9.1   | 8.50 |

|        |                                                                                                                                                        |       |   |    |    |    |       |       |       |       |       |       |    |    |      |       |      |
|--------|--------------------------------------------------------------------------------------------------------------------------------------------------------|-------|---|----|----|----|-------|-------|-------|-------|-------|-------|----|----|------|-------|------|
| Q9NQC7 | Ubiquitin<br>carboxyl-<br>terminal<br>hydrolase CYLD<br>OS=Homo<br>sapiens<br>GN=CYLD PE=1<br>SV=1 -<br>[CYLD_HUMAN]                                   | 1.15  | 1 | 1  | 1  | 2  | 0.831 | 1.021 | 1.661 | 0.952 | 2.54  | 1.15  | 2  | 2  | 956  | 107.2 | 5.59 |
| O75179 | Ankyrin repeat<br>domain-<br>containing<br>protein 17<br>OS=Homo<br>sapiens<br>GN=ANKRD17<br>PE=1 SV=3 -<br>[ANR17_HUMAN<br>]                          | 5.95  | 1 | 8  | 12 | 23 | 0.607 | 0.977 | 1.121 | 0.952 | 48.92 | 5.95  | 17 | 23 | 2603 | 274.1 | 6.52 |
| Q9HD42 | Charged<br>multivesicular<br>body protein<br>1a OS=Homo<br>sapiens<br>GN=CHMP1A<br>PE=1 SV=1 -<br>[CHM1A_HUMA<br>N]                                    | 23.47 | 1 | 6  | 6  | 22 | 0.884 | 0.927 | 1.144 | 0.952 | 45.90 | 23.47 | 11 | 22 | 196  | 21.7  | 8.06 |
| O60507 | Protein-<br>tyrosine<br>sulfotransferas<br>e 1 OS=Homo<br>sapiens<br>GN=TPST1<br>PE=2 SV=1 -<br>[TPST1_HUMAN]                                          | 7.03  | 1 | 2  | 2  | 6  | 1.424 | 0.920 | 0.644 | 0.953 | 5.87  | 7.03  | 4  | 6  | 370  | 42.2  | 9.09 |
| P19525 | Interferon-<br>induced,<br>double-<br>stranded RNA-<br>activated<br>protein kinase<br>OS=Homo<br>sapiens<br>GN=EIF2AK2<br>PE=1 SV=2 -<br>[E2AK2_HUMAN] | 20.69 | 1 | 11 | 11 | 32 | 1.942 | 1.019 | 0.989 | 0.953 | 75.30 | 20.69 | 18 | 32 | 551  | 62.1  | 8.40 |
| Q96BA8 | Cyclic AMP-<br>responsive<br>element-<br>binding protein<br>3-like protein 1<br>OS=Homo<br>sapiens<br>GN=CREB3L1<br>PE=1 SV=1 -<br>[CR3L1_HUMAN<br>]   | 3.08  | 1 | 2  | 2  | 5  | 0.496 | 0.533 | 0.615 | 0.953 | 5.76  | 3.08  | 4  | 5  | 519  | 57.0  | 5.17 |
| Q02763 | Angiotensin-1<br>receptor<br>OS=Homo<br>sapiens<br>GN=TEK PE=1<br>SV=2 -<br>[TIE2_HUMAN]                                                               | 2.22  | 1 | 3  | 3  | 3  | 3.219 | 0.200 | 0.528 | 0.953 | 3.79  | 2.22  | 3  | 3  | 1124 | 125.7 | 6.89 |
| Q53FT3 | Protein Hikeshi<br>OS=Homo<br>sapiens<br>GN=C11orf73<br>PE=1 SV=2 -<br>[HIKES_HUMAN<br>]                                                               | 8.12  | 1 | 1  | 1  | 4  | 1.339 | 1.337 | 1.170 | 0.953 | 8.17  | 8.12  | 2  | 4  | 197  | 21.6  | 5.45 |

|        |                                                                                                                        |       |   |    |    |     |       |       |       |       |         |       |    |     |      |       |       |
|--------|------------------------------------------------------------------------------------------------------------------------|-------|---|----|----|-----|-------|-------|-------|-------|---------|-------|----|-----|------|-------|-------|
| O15021 | Microtubule-associated serine/threonine-protein kinase 4<br>OS=Homo sapiens<br>GN=MAST4<br>PE=1 SV=3 - [MAST4_HUMAN]   | 1.75  | 1 | 3  | 3  | 4   | 0.950 | 2.311 | 1.551 | 0.953 | 2.65    | 1.75  | 4  | 4   | 2626 | 284.2 | 8.62  |
| P40222 | Alpha-taxilin<br>OS=Homo sapiens<br>GN=TXLNA<br>PE=1 SV=3 - [TXLNA_HUMAN]                                              | 50.73 | 2 | 22 | 23 | 87  | 0.918 | 1.091 | 0.999 | 0.953 | 225.28  | 50.73 | 38 | 87  | 546  | 61.9  | 6.52  |
| P84101 | Small EDRK-rich factor 2<br>OS=Homo sapiens<br>GN=SERF2<br>PE=1 SV=1 - [SERF2_HUMAN]                                   | 13.56 | 1 | 1  | 1  | 15  | 0.723 | 1.098 | 0.904 | 0.953 | 41.01   | 13.56 | 2  | 15  | 59   | 6.9   | 10.45 |
| Q6RFH5 | WD repeat-containing protein 74<br>OS=Homo sapiens<br>GN=WDR74<br>PE=1 SV=1 - [WDR74_HUMAN]                            | 7.01  | 1 | 2  | 2  | 2   | 1.006 | 0.767 | 0.699 | 0.953 | 6.19    | 7.01  | 2  | 2   | 385  | 42.4  | 8.32  |
| P68104 | Elongation factor 1-alpha<br>OS=Homo sapiens<br>GN=EEF1A1<br>PE=1 SV=1 - [EF1A1_HUMAN]                                 | 71.65 | 2 | 18 | 33 | 807 | 0.838 | 0.840 | 0.908 | 0.953 | 2053.72 | 71.65 | 51 | 807 | 462  | 50.1  | 9.01  |
| P16152 | Carbonyl reductase [NADPH] 1<br>OS=Homo sapiens<br>GN=CBR1<br>PE=1 SV=3 - [CBR1_HUMAN]                                 | 62.45 | 1 | 11 | 14 | 206 | 1.139 | 0.974 | 0.990 | 0.953 | 666.49  | 62.45 | 24 | 206 | 277  | 30.4  | 8.32  |
| Q9P260 | LisH domain and HEAT repeat-containing protein KIAA1468<br>OS=Homo sapiens<br>GN=KIAA1468<br>PE=1 SV=2 - [K1468_HUMAN] | 9.46  | 1 | 12 | 12 | 22  | 1.042 | 1.000 | 0.992 | 0.953 | 48.66   | 9.46  | 17 | 22  | 1216 | 134.5 | 5.45  |
| Q7Z2Y8 | Interferon-induced very large GTPase 1<br>OS=Homo sapiens<br>GN=GVINP1<br>PE=2 SV=2 - [GVINI_HUMAN]                    | 2.27  | 1 | 4  | 4  | 4   | 0.619 | 1.126 | 1.124 | 0.953 | 2.27    | 2.27  | 4  | 4   | 2422 | 278.9 | 6.55  |
| Q8WXD0 | Relaxin receptor 2<br>OS=Homo sapiens<br>GN=RXFP2<br>PE=1 SV=1 - [RXFP2_HUMAN]                                         | 1.99  | 1 | 1  | 1  | 1   | 0.857 | 2.370 | 3.885 | 0.953 | 0.00    | 1.99  | 1  | 1   | 754  | 86.4  | 8.76  |

|        |                                                                                                                        |       |   |    |    |     |       |       |       |       |        |       |    |     |      |       |      |
|--------|------------------------------------------------------------------------------------------------------------------------|-------|---|----|----|-----|-------|-------|-------|-------|--------|-------|----|-----|------|-------|------|
| P09497 | Clathrin light chain B<br>OS=Homo sapiens<br>GN=CLTB PE=1 SV=1 - [CLCB_HUMAN]                                          | 25.76 | 1 | 10 | 10 | 103 | 1.266 | 0.913 | 1.126 | 0.953 | 221.26 | 25.76 | 19 | 103 | 229  | 25.2  | 4.64 |
| Q6ZMG9 | Ceramide synthase 6<br>OS=Homo sapiens<br>GN=CERS6 PE=1 SV=1 - [CERS6_HUMAN]                                           | 4.95  | 2 | 2  | 2  | 3   | 1.070 | 1.182 | 0.966 | 0.953 | 5.39   | 4.95  | 3  | 3   | 384  | 44.9  | 7.65 |
| Q709C8 | Vacuolar protein sorting-associated protein 13C<br>OS=Homo sapiens<br>GN=VPS13C PE=1 SV=1 - [VP13C_HUMAN]              | 6.58  | 2 | 22 | 22 | 40  | 1.201 | 0.889 | 0.965 | 0.953 | 80.51  | 6.58  | 29 | 40  | 3753 | 422.1 | 6.83 |
| O00506 | Serine/threonine-protein kinase 25<br>OS=Homo sapiens<br>GN=STK25 PE=1 SV=1 - [STK25_HUMAN]                            | 22.77 | 1 | 6  | 9  | 30  | 1.278 | 0.971 | 1.035 | 0.954 | 88.55  | 22.77 | 13 | 30  | 426  | 48.1  | 6.74 |
| Q9NR19 | Acetyl-coenzyme A synthetase, cytoplasmic<br>OS=Homo sapiens<br>GN=ACSS2 PE=1 SV=1 - [ACSA_HUMAN]                      | 16.26 | 1 | 10 | 10 | 28  | 1.350 | 0.808 | 1.058 | 0.954 | 58.90  | 16.26 | 15 | 28  | 701  | 78.5  | 6.46 |
| O95167 | NADH dehydrogenase [ubiquinone] 1 alpha subcomplex subunit 3<br>OS=Homo sapiens<br>GN=NDUFA3 PE=1 SV=1 - [NDUA3_HUMAN] | 57.14 | 1 | 4  | 4  | 10  | 0.639 | 0.902 | 0.680 | 0.954 | 23.66  | 57.14 | 6  | 10  | 84   | 9.3   | 8.46 |
| Q96JA1 | Leucine-rich repeats and immunoglobulin-like domains protein 1<br>OS=Homo sapiens<br>GN=LRI1 PE=1 SV=2 - [LRI1_HUMAN]  | 1.92  | 3 | 2  | 2  | 4   | 0.473 | 1.477 | 1.445 | 0.954 | 7.31   | 1.92  | 3  | 4   | 1093 | 119.0 | 7.09 |
| Q9UBB4 | Ataxin-10<br>OS=Homo sapiens<br>GN=ATXN10 PE=1 SV=1 - [ATX10_HUMAN]                                                    | 32.21 | 1 | 16 | 16 | 61  | 0.793 | 0.903 | 1.195 | 0.954 | 134.02 | 32.21 | 26 | 61  | 475  | 53.5  | 5.25 |

|        |                                                                                                                                                                          |       |   |    |    |     |       |       |       |       |        |       |    |     |      |       |      |
|--------|--------------------------------------------------------------------------------------------------------------------------------------------------------------------------|-------|---|----|----|-----|-------|-------|-------|-------|--------|-------|----|-----|------|-------|------|
| Q14534 | Squalene<br>monooxygenase<br>OS=Homo<br>sapiens<br>GN=SQLE<br>PE=1 SV=3 -<br>[ERGI_HUMAN]                                                                                | 4.01  | 1 | 2  | 2  | 3   | 0.989 | 0.560 | 1.126 | 0.954 | 8.32   | 4.01  | 2  | 3   | 574  | 63.9  | 8.63 |
| Q96RT1 | Protein LAP2<br>OS=Homo<br>sapiens<br>GN=ERBB2IP<br>PE=1 SV=2 -<br>[LAP2_HUMAN]                                                                                          | 12.68 | 2 | 15 | 16 | 41  | 0.880 | 1.064 | 1.081 | 0.954 | 79.90  | 12.68 | 25 | 41  | 1412 | 158.2 | 5.50 |
| O95861 | 3'(2'),5'-<br>bisphosphate<br>nucleotidase 1<br>OS=Homo<br>sapiens<br>GN=BPNT1<br>PE=1 SV=1 -<br>[BPNT1_HUMAN<br>]                                                       | 33.12 | 1 | 10 | 10 | 27  | 1.061 | 0.958 | 0.965 | 0.954 | 68.81  | 33.12 | 17 | 27  | 308  | 33.4  | 5.69 |
| A2RRP1 | Neuroblastoma-<br>amplified<br>sequence<br>OS=Homo<br>sapiens<br>GN=NBAS<br>PE=1 SV=2 -<br>[NBAS_HUMAN]                                                                  | 7.76  | 1 | 17 | 17 | 40  | 0.836 | 0.796 | 0.950 | 0.954 | 93.33  | 7.76  | 25 | 40  | 2371 | 268.4 | 5.96 |
| Q9Y316 | Protein<br>MEMO1<br>OS=Homo<br>sapiens<br>GN=MEMO1<br>PE=1 SV=1 -<br>[MEMO1_HUMA<br>]                                                                                    | 19.19 | 1 | 4  | 4  | 17  | 0.902 | 1.007 | 0.843 | 0.954 | 45.02  | 19.19 | 7  | 17  | 297  | 33.7  | 7.14 |
| Q96T68 | Histone-lysine N-<br>methyltransferase<br>SETDB2<br>OS=Homo<br>sapiens<br>GN=SETDB2<br>PE=1 SV=2 -<br>[SETB2_HUMAN<br>]                                                  | 0.97  | 1 | 1  | 1  | 1   | 1.013 | 1.299 | 0.505 | 0.954 | 1.95   | 0.97  | 1  | 1   | 719  | 81.8  | 7.50 |
| O15357 | Phosphatidylino-<br>sitol 3,4,5-<br>trisphosphate<br>5-phosphatase<br>2 OS=Homo<br>sapiens<br>GN=INPPL1<br>PE=1 SV=2 -<br>[SHIP2_HUMAN<br>]                              | 16.69 | 1 | 17 | 17 | 37  | 1.071 | 0.898 | 1.053 | 0.954 | 69.66  | 16.69 | 25 | 37  | 1258 | 138.5 | 6.54 |
| P11234 | Ras-related<br>protein Ral-B<br>OS=Homo<br>sapiens<br>GN=RALB PE=1<br>SV=1 -<br>[RALB_HUMAN]                                                                             | 48.54 | 1 | 4  | 7  | 22  | 1.705 | 1.547 | 1.113 | 0.954 | 51.27  | 48.54 | 10 | 22  | 206  | 23.4  | 6.62 |
| P30153 | Serine/threoni-<br>ne-protein<br>phosphatase<br>2A 65 kDa<br>regulatory<br>subunit A<br>alpha isoform<br>OS=Homo<br>sapiens<br>GN=PPP2R1A<br>PE=1 SV=4 -<br>[2AAA_HUMAN] | 48.05 | 1 | 20 | 25 | 198 | 1.045 | 1.072 | 1.099 | 0.954 | 439.22 | 48.05 | 42 | 198 | 589  | 65.3  | 5.11 |

|        |                                                                                                                                  |       |   |    |    |      |       |       |       |       |         |       |    |      |     |       |      |
|--------|----------------------------------------------------------------------------------------------------------------------------------|-------|---|----|----|------|-------|-------|-------|-------|---------|-------|----|------|-----|-------|------|
| Q9Y2G8 | DnaJ homolog subfamily C member 16<br>OS=Homo sapiens<br>GN=DNAJC16<br>PE=2 SV=3 - [DJC16_HUMAN]                                 | 4.48  | 2 | 4  | 4  | 9    | 1.144 | 0.992 | 1.081 | 0.954 | 17.46   | 4.48  | 6  | 9    | 782 | 90.5  | 7.12 |
| P45954 | Short/branched chain specific acyl-CoA dehydrogenase, mitochondrial<br>OS=Homo sapiens<br>GN=ACADSB<br>PE=1 SV=1 - [ACDSB_HUMAN] | 25.69 | 1 | 8  | 8  | 28   | 1.063 | 1.427 | 0.995 | 0.954 | 54.58   | 25.69 | 14 | 28   | 432 | 47.5  | 6.99 |
| P28066 | Proteasome subunit alpha type-5<br>OS=Homo sapiens<br>GN=PSMA5<br>PE=1 SV=3 - [PSA5_HUMAN]                                       | 54.77 | 1 | 10 | 10 | 139  | 1.072 | 1.001 | 1.014 | 0.954 | 381.18  | 54.77 | 16 | 139  | 241 | 26.4  | 4.79 |
| Q9ULV3 | Cip1-interacting zinc finger protein<br>OS=Homo sapiens<br>GN=CIZ1 PE=1 SV=2 - [CIZ1_HUMAN]                                      | 5.01  | 1 | 3  | 3  | 4    | 0.876 | 0.865 | 0.905 | 0.954 | 6.38    | 5.01  | 4  | 4    | 898 | 100.0 | 6.11 |
| Q05823 | 2-5A-dependent ribonuclease<br>OS=Homo sapiens<br>GN=RNASEL<br>PE=1 SV=2 - [RNSA_HUMAN]                                          | 7.96  | 5 | 6  | 7  | 12   | 1.146 | 0.826 | 1.005 | 0.955 | 30.65   | 7.96  | 9  | 12   | 741 | 83.5  | 6.65 |
| P07237 | Protein disulfide-isomerase<br>OS=Homo sapiens<br>GN=P4HB<br>PE=1 SV=3 - [PDI1_HUMAN]                                            | 73.23 | 1 | 47 | 48 | 1521 | 0.870 | 0.945 | 1.056 | 0.955 | 3999.59 | 73.23 | 82 | 1521 | 508 | 57.1  | 4.87 |
| Q15813 | Tubulin-specific chaperone E<br>OS=Homo sapiens<br>GN=TBCE<br>PE=1 SV=1 - [TBCE_HUMAN]                                           | 23.53 | 1 | 10 | 13 | 39   | 0.891 | 1.254 | 1.196 | 0.955 | 71.02   | 23.53 | 20 | 39   | 527 | 59.3  | 6.76 |
| Q96559 | Ran-binding protein 9<br>OS=Homo sapiens<br>GN=RANBP9<br>PE=1 SV=1 - [RANB9_HUMAN]                                               | 9.05  | 1 | 5  | 6  | 19   | 0.726 | 0.784 | 1.201 | 0.955 | 41.54   | 9.05  | 11 | 19   | 729 | 77.8  | 6.79 |
| Q6P1N9 | Putative deoxyribonuclease TATDN1<br>OS=Homo sapiens<br>GN=TATDN1<br>PE=1 SV=2 - [TATD1_HUMAN]                                   | 26.94 | 1 | 8  | 9  | 26   | 0.803 | 0.993 | 1.108 | 0.955 | 58.60   | 26.94 | 16 | 26   | 297 | 33.6  | 6.96 |

|        |                                                                                                                                                                                                                                                                                                                                                                                                                                                                                                                                                                                                                                                                                              |       |   |    |    |      |       |       |       |       |         |       |     |      |      |       |       |
|--------|----------------------------------------------------------------------------------------------------------------------------------------------------------------------------------------------------------------------------------------------------------------------------------------------------------------------------------------------------------------------------------------------------------------------------------------------------------------------------------------------------------------------------------------------------------------------------------------------------------------------------------------------------------------------------------------------|-------|---|----|----|------|-------|-------|-------|-------|---------|-------|-----|------|------|-------|-------|
| Q96K76 | Ubiquitin<br>carboxyl-<br>terminal<br>hydrolase 47<br>OS=Homo<br>sapiens<br>GN=USP47<br>PE=1 SV=3 -<br>[UBP47_HUMAN<br>]<br>Insulin-like<br>growth factor<br>1 receptor<br>OS=Homo<br>sapiens<br>GN=IGF1R<br>PE=1 SV=1 -<br>[IGF1R_HUMAN<br>]<br>Cysteine<br>protease<br>ATG4B<br>OS=Homo<br>sapiens<br>GN=ATG4B<br>PE=1 SV=2 -<br>[ATG4B_HUMAN<br>]<br>PRA1 family<br>protein 3<br>OS=Homo<br>sapiens<br>GN=ARL6IP5<br>PE=1 SV=1 -<br>[PRAF3_HUMAN<br>]<br>Cell division<br>cycle protein<br>23 homolog<br>OS=Homo<br>sapiens<br>GN=CDC23<br>PE=1 SV=3 -<br>[CDC23_HUMAN<br>]<br>40S ribosomal<br>protein S4, X<br>isoform<br>OS=Homo<br>sapiens<br>GN=RPS4X<br>PE=1 SV=2 -<br>[RS4X_HUMAN] | 12.80 | 1 | 15 | 16 | 44   | 1.015 | 0.996 | 0.884 | 0.955 | 116.40  | 12.80 | 24  | 44   | 1375 | 157.2 | 5.08  |
| P08069 | OS=Homo<br>sapiens<br>GN=IGF1R<br>PE=1 SV=1 -<br>[IGF1R_HUMAN<br>]<br>Cysteine<br>protease<br>ATG4B<br>OS=Homo<br>sapiens<br>GN=ATG4B<br>PE=1 SV=2 -<br>[ATG4B_HUMAN<br>]<br>PRA1 family<br>protein 3<br>OS=Homo<br>sapiens<br>GN=ARL6IP5<br>PE=1 SV=1 -<br>[PRAF3_HUMAN<br>]<br>Cell division<br>cycle protein<br>23 homolog<br>OS=Homo<br>sapiens<br>GN=CDC23<br>PE=1 SV=3 -<br>[CDC23_HUMAN<br>]<br>40S ribosomal<br>protein S4, X<br>isoform<br>OS=Homo<br>sapiens<br>GN=RPS4X<br>PE=1 SV=2 -<br>[RS4X_HUMAN]                                                                                                                                                                            | 3.29  | 1 | 4  | 4  | 6    | 0.992 | 0.861 | 0.948 | 0.955 | 13.78   | 3.29  | 5   | 6    | 1367 | 154.7 | 5.80  |
| Q9Y4P1 | OS=Homo<br>sapiens<br>GN=ATG4B<br>PE=1 SV=2 -<br>[ATG4B_HUMAN<br>]<br>PRA1 family<br>protein 3<br>OS=Homo<br>sapiens<br>GN=ARL6IP5<br>PE=1 SV=1 -<br>[PRAF3_HUMAN<br>]<br>Cell division<br>cycle protein<br>23 homolog<br>OS=Homo<br>sapiens<br>GN=CDC23<br>PE=1 SV=3 -<br>[CDC23_HUMAN<br>]<br>40S ribosomal<br>protein S4, X<br>isoform<br>OS=Homo<br>sapiens<br>GN=RPS4X<br>PE=1 SV=2 -<br>[RS4X_HUMAN]                                                                                                                                                                                                                                                                                   | 12.21 | 1 | 3  | 3  | 5    | 0.513 | 0.886 | 0.837 | 0.955 | 15.17   | 12.21 | 4   | 5    | 393  | 44.3  | 5.07  |
| O75915 | OS=Homo<br>sapiens<br>GN=ARL6IP5<br>PE=1 SV=1 -<br>[PRAF3_HUMAN<br>]<br>Cell division<br>cycle protein<br>23 homolog<br>OS=Homo<br>sapiens<br>GN=CDC23<br>PE=1 SV=3 -<br>[CDC23_HUMAN<br>]<br>40S ribosomal<br>protein S4, X<br>isoform<br>OS=Homo<br>sapiens<br>GN=RPS4X<br>PE=1 SV=2 -<br>[RS4X_HUMAN]                                                                                                                                                                                                                                                                                                                                                                                     | 28.72 | 1 | 7  | 7  | 65   | 0.963 | 1.330 | 1.177 | 0.955 | 215.63  | 28.72 | 11  | 65   | 188  | 21.6  | 9.77  |
| Q9UJX2 | OS=Homo<br>sapiens<br>GN=CDC23<br>PE=1 SV=3 -<br>[CDC23_HUMAN<br>]<br>40S ribosomal<br>protein S4, X<br>isoform<br>OS=Homo<br>sapiens<br>GN=RPS4X<br>PE=1 SV=2 -<br>[RS4X_HUMAN]                                                                                                                                                                                                                                                                                                                                                                                                                                                                                                             | 1.51  | 1 | 1  | 1  | 3    | 0.404 | 1.275 | 2.514 | 0.956 | 0.00    | 1.51  | 2   | 3    | 597  | 68.8  | 7.02  |
| P62701 | OS=Homo<br>sapiens<br>GN=RPS4X<br>PE=1 SV=2 -<br>[RS4X_HUMAN]                                                                                                                                                                                                                                                                                                                                                                                                                                                                                                                                                                                                                                | 56.27 | 1 | 13 | 20 | 98   | 0.888 | 0.961 | 0.879 | 0.956 | 235.51  | 56.27 | 32  | 98   | 263  | 29.6  | 10.15 |
| Q00610 | Clathrin heavy<br>chain 1<br>OS=Homo<br>sapiens<br>GN=CLTC PE=1<br>SV=5 -<br>[CLH1_HUMAN]                                                                                                                                                                                                                                                                                                                                                                                                                                                                                                                                                                                                    | 50.75 | 1 | 58 | 77 | 1230 | 1.066 | 0.911 | 1.038 | 0.956 | 3081.85 | 50.75 | 132 | 1230 | 1675 | 191.5 | 5.69  |
| Q81VD9 | NudC domain-<br>containing<br>protein 3<br>OS=Homo<br>sapiens<br>GN=NUDC3<br>PE=1 SV=3 -<br>[NUDC3_HUMAN<br>]<br>Probable<br>palmitoyltransf<br>erase ZDHHC24<br>OS=Homo<br>sapiens<br>GN=ZDHHC24<br>PE=2 SV=1 -<br>[ZDH24_HUMAN<br>]                                                                                                                                                                                                                                                                                                                                                                                                                                                        | 14.13 | 1 | 6  | 7  | 15   | 0.882 | 1.195 | 1.073 | 0.956 | 28.27   | 14.13 | 9   | 15   | 361  | 40.8  | 5.25  |
| Q6LUX8 | Probable<br>palmitoyltransf<br>erase ZDHHC24<br>OS=Homo<br>sapiens<br>GN=ZDHHC24<br>PE=2 SV=1 -<br>[ZDH24_HUMAN<br>]                                                                                                                                                                                                                                                                                                                                                                                                                                                                                                                                                                         | 2.46  | 1 | 1  | 1  | 1    | 0.845 | 0.615 | 0.547 | 0.956 | 1.83    | 2.46  | 1   | 1    | 284  | 30.2  | 8.59  |

|        |                                                                                                                                      |       |   |    |    |     |       |       |       |       |        |       |    |     |      |       |      |
|--------|--------------------------------------------------------------------------------------------------------------------------------------|-------|---|----|----|-----|-------|-------|-------|-------|--------|-------|----|-----|------|-------|------|
| Q8NBJS | Procollagen galactosyltransferase 1<br>OS=Homo sapiens<br>GN=COLGALT1<br>PE=1 SV=1 - [GT251_HUMAN]                                   | 33.76 | 1 | 21 | 22 | 95  | 0.706 | 0.848 | 1.019 | 0.956 | 220.11 | 33.76 | 38 | 95  | 622  | 71.6  | 7.31 |
| Q9Y5K5 | Ubiquitin carboxyl-terminal hydrolase isozyme L5<br>OS=Homo sapiens<br>GN=UCHL5<br>PE=1 SV=3 - [UCHL5_HUMAN]                         | 30.70 | 2 | 8  | 9  | 31  | 0.797 | 0.997 | 0.836 | 0.956 | 70.67  | 30.70 | 14 | 31  | 329  | 37.6  | 5.33 |
| Q53GG5 | PDZ and LIM domain protein 3<br>OS=Homo sapiens<br>GN=PDLIM3<br>PE=1 SV=1 - [PDLI3_HUMAN]                                            | 18.13 | 1 | 5  | 5  | 23  | 1.128 | 3.527 | 5.195 | 0.956 | 68.58  | 18.13 | 8  | 23  | 364  | 39.2  | 6.89 |
| P67775 | Serine/threonine-protein phosphatase 2A catalytic subunit alpha isoform<br>OS=Homo sapiens<br>GN=PPP2CA<br>PE=1 SV=1 - [PP2AA_HUMAN] | 45.31 | 2 | 12 | 12 | 77  | 1.010 | 1.094 | 1.041 | 0.956 | 173.57 | 45.31 | 19 | 77  | 309  | 35.6  | 5.54 |
| Q9H444 | Charged multivesicular body protein 4b<br>OS=Homo sapiens<br>GN=CHMP4B<br>PE=1 SV=1 - [CHM4B_HUMAN]                                  | 40.18 | 3 | 10 | 10 | 52  | 0.884 | 1.247 | 1.117 | 0.956 | 97.80  | 40.18 | 16 | 52  | 224  | 24.9  | 4.82 |
| Q9Y2H9 | Microtubule-associated serine/threonine-protein kinase 1<br>OS=Homo sapiens<br>GN=MAST1<br>PE=1 SV=2 - [MAST1_HUMAN]                 | 4.20  | 2 | 3  | 4  | 6   | 1.679 | 1.648 | 1.290 | 0.956 | 3.39   | 4.20  | 4  | 6   | 1570 | 170.6 | 8.44 |
| P53367 | Arfaptin-1<br>OS=Homo sapiens<br>GN=ARFIP1<br>PE=1 SV=2 - [ARFP1_HUMAN]                                                              | 49.60 | 1 | 14 | 16 | 43  | 1.030 | 0.955 | 1.097 | 0.956 | 113.18 | 49.60 | 24 | 43  | 373  | 41.7  | 6.70 |
| Q9Y6C9 | Mitochondrial carrier homolog 2<br>OS=Homo sapiens<br>GN=MTCH2<br>PE=1 SV=1 - [MTCH2_HUMAN]                                          | 12.87 | 1 | 3  | 3  | 8   | 1.236 | 1.025 | 0.823 | 0.956 | 12.79  | 12.87 | 5  | 8   | 303  | 33.3  | 7.97 |
| P00441 | Superoxide dismutase [Cu-Zn]<br>OS=Homo sapiens<br>GN=SOD1<br>PE=1 SV=2 - [SODC_HUMAN]                                               | 86.36 | 1 | 12 | 12 | 104 | 1.132 | 1.049 | 1.043 | 0.956 | 297.49 | 86.36 | 16 | 104 | 154  | 15.9  | 6.13 |



|        |                                                                                                                          |       |   |    |    |     |       |       |       |       |         |       |    |     |      |       |       |
|--------|--------------------------------------------------------------------------------------------------------------------------|-------|---|----|----|-----|-------|-------|-------|-------|---------|-------|----|-----|------|-------|-------|
| Q8WWM7 | Ataxin-2-like protein<br>OS=Homo sapiens<br>GN=ATXN2L<br>PE=1 SV=2 - [ATX2L_HUMAN]                                       | 25.49 | 1 | 23 | 25 | 115 | 0.857 | 0.962 | 0.995 | 0.956 | 244.14  | 25.49 | 41 | 115 | 1075 | 113.3 | 8.59  |
| P62249 | 40S ribosomal protein S16<br>OS=Homo sapiens<br>GN=RPS16<br>PE=1 SV=2 - [RS16_HUMAN]                                     | 64.38 | 1 | 16 | 16 | 109 | 0.906 | 0.882 | 0.810 | 0.956 | 203.91  | 64.38 | 23 | 109 | 146  | 16.4  | 10.21 |
| Q9P2R3 | Rabankyrin-5<br>OS=Homo sapiens<br>GN=ANKFY1<br>PE=1 SV=2 - [ANFY1_HUMAN]                                                | 17.37 | 2 | 16 | 17 | 47  | 1.106 | 0.847 | 0.858 | 0.956 | 117.99  | 17.37 | 26 | 47  | 1169 | 128.3 | 6.10  |
| Q96BW1 | Uracil phosphoribosyl transferase homolog<br>OS=Homo sapiens<br>GN=UPRT<br>PE=2 SV=1 - [UPP_HUMAN]                       | 3.56  | 1 | 1  | 1  | 4   | 1.052 | 0.712 | 0.655 | 0.956 | 5.96    | 3.56  | 2  | 4   | 309  | 33.8  | 6.04  |
| Q8NBT2 | Kinetochore protein Spc24<br>OS=Homo sapiens<br>GN=SPC24<br>PE=1 SV=2 - [SPC24_HUMAN]                                    | 20.81 | 3 | 3  | 4  | 20  | 1.164 | 1.910 | 0.525 | 0.956 | 45.78   | 20.81 | 7  | 20  | 197  | 22.5  | 4.70  |
| O00429 | Dynammin-1-like protein<br>OS=Homo sapiens<br>GN=DNM1L<br>PE=1 SV=2 - [DNM1L_HUMAN]                                      | 40.35 | 1 | 29 | 29 | 98  | 1.100 | 1.102 | 0.948 | 0.956 | 270.60  | 40.35 | 48 | 98  | 736  | 81.8  | 6.81  |
| Q6NUP7 | Serine/threonine-protein phosphatase 4 regulatory subunit 4<br>OS=Homo sapiens<br>GN=PPP4R4<br>PE=1 SV=1 - [PP4R4_HUMAN] | 2.18  | 1 | 2  | 2  | 5   | 1.971 | 0.361 | 0.494 | 0.956 | 3.79    | 2.18  | 2  | 5   | 873  | 99.4  | 7.80  |
| Q6UVY6 | DBH-like monooxygenase protein 1<br>OS=Homo sapiens<br>GN=MOXD1<br>PE=2 SV=1 - [MOXD1_HUMAN]                             | 12.07 | 1 | 6  | 6  | 10  | 0.811 | 2.542 | 0.905 | 0.956 | 18.93   | 12.07 | 7  | 10  | 613  | 69.6  | 6.43  |
| P13639 | Elongation factor 2<br>OS=Homo sapiens<br>GN=EEF2<br>PE=1 SV=4 - [EF2_HUMAN]                                             | 55.59 | 1 | 53 | 56 | 932 | 0.764 | 0.796 | 0.873 | 0.957 | 2515.65 | 55.59 | 92 | 932 | 858  | 95.3  | 6.83  |

|        |                                                                                                                |       |   |    |    |    |       |       |       |       |       |       |    |    |      |       |      |
|--------|----------------------------------------------------------------------------------------------------------------|-------|---|----|----|----|-------|-------|-------|-------|-------|-------|----|----|------|-------|------|
| Q04323 | UBX domain-containing protein 1<br>OS=Homo sapiens<br>GN=UBXN1<br>PE=1 SV=2 - [UBXN1_HUMAN]                    | 51.18 | 1 | 9  | 9  | 20 | 0.850 | 1.035 | 0.990 | 0.957 | 64.71 | 51.18 | 12 | 20 | 297  | 33.3  | 5.25 |
| P67870 | Casein kinase II subunit beta<br>OS=Homo sapiens<br>GN=CSNK2B<br>PE=1 SV=1 - [CSK2B_HUMAN]                     | 26.05 | 1 | 6  | 6  | 19 | 0.763 | 0.908 | 0.917 | 0.957 | 51.62 | 26.05 | 10 | 19 | 215  | 24.9  | 5.55 |
| O76054 | SEC14-like protein 2<br>OS=Homo sapiens<br>GN=SEC14L2<br>PE=1 SV=1 - [S14L2_HUMAN]                             | 11.91 | 1 | 5  | 5  | 15 | 0.711 | 1.307 | 1.438 | 0.957 | 34.84 | 11.91 | 8  | 15 | 403  | 46.1  | 7.84 |
| Q07108 | Early activation antigen CD69<br>OS=Homo sapiens<br>GN=CD69<br>PE=1 SV=1 - [CD69_HUMAN]                        | 6.53  | 1 | 1  | 1  | 1  | 1.216 | 0.533 | 0.807 | 0.957 | 2.51  | 6.53  | 1  | 1  | 199  | 22.5  | 6.61 |
| P56377 | AP-1 complex subunit sigma-2<br>OS=Homo sapiens<br>GN=AP1S2<br>PE=1 SV=1 - [AP1S2_HUMAN]                       | 15.92 | 1 | 2  | 2  | 8  | 0.817 | 1.279 | 1.704 | 0.957 | 19.24 | 15.92 | 4  | 8  | 157  | 18.6  | 5.47 |
| Q63HK3 | Zinc finger protein with KRAB and SCAN domains 2<br>OS=Homo sapiens<br>GN=ZKSCAN2<br>PE=1 SV=2 - [ZKSC2_HUMAN] | 2.69  | 1 | 1  | 2  | 3  | 1.362 | 1.454 | 1.780 | 0.957 | 8.47  | 2.69  | 2  | 3  | 967  | 110.9 | 8.35 |
| P52888 | Thimet oligopeptidase<br>OS=Homo sapiens<br>GN=THOP1<br>PE=1 SV=2 - [THOP1_HUMAN]                              | 23.80 | 1 | 15 | 15 | 41 | 1.017 | 0.937 | 1.001 | 0.957 | 95.03 | 23.80 | 22 | 41 | 689  | 78.8  | 6.05 |
| P98196 | Probable phospholipid-transporting ATPase IH<br>OS=Homo sapiens<br>GN=ATP11A<br>PE=1 SV=3 - [AT11A_HUMAN]      | 2.20  | 1 | 3  | 3  | 3  | 1.167 | 0.647 | 0.627 | 0.957 | 5.72  | 2.20  | 3  | 3  | 1134 | 129.7 | 6.60 |
| Q9Y3D9 | 28S ribosomal protein S23, mitochondrial<br>OS=Homo sapiens<br>GN=MRPS23<br>PE=1 SV=2 - [RT23_HUMAN]           | 31.05 | 1 | 6  | 6  | 10 | 0.654 | 0.923 | 1.020 | 0.957 | 27.18 | 31.05 | 9  | 10 | 190  | 21.8  | 8.90 |

|        |                                                                                                                                                                                                                                                                                                                                                                                  |       |   |    |    |    |       |       |       |       |       |       |    |    |      |       |      |
|--------|----------------------------------------------------------------------------------------------------------------------------------------------------------------------------------------------------------------------------------------------------------------------------------------------------------------------------------------------------------------------------------|-------|---|----|----|----|-------|-------|-------|-------|-------|-------|----|----|------|-------|------|
| P27987 | Inositol-<br>trisphosphate<br>3-kinase B<br>OS=Homo<br>sapiens<br>GN=ITPKB<br>PE=1 SV=5 -<br>[IP3KB_HUMAN<br>]<br>Alpha-1,3-<br>mannosyl-<br>glycoprotein 2-<br>beta-N-<br>acetylglucosami<br>nyltransferase<br>OS=Homo<br>sapiens<br>GN=MGAT1<br>PE=2 SV=2 -<br>[MGAT1_HUMA<br>N]<br>Protein<br>CLEC16A<br>OS=Homo<br>sapiens<br>GN=CLEC16A<br>PE=2 SV=2 -<br>[CL16A_HUMAN<br>] | 7.29  | 1 | 5  | 5  | 11 | 0.692 | 1.628 | 1.027 | 0.958 | 22.37 | 7.29  | 6  | 11 | 946  | 102.3 | 8.43 |
| P26572 | Protein<br>CLEC16A<br>OS=Homo<br>sapiens<br>GN=CLEC16A<br>PE=2 SV=2 -<br>[CL16A_HUMAN<br>]                                                                                                                                                                                                                                                                                       | 24.94 | 1 | 10 | 10 | 19 | 1.256 | 0.788 | 0.790 | 0.958 | 39.12 | 24.94 | 15 | 19 | 445  | 50.8  | 9.16 |
| Q2KHT3 | Ferrochelatase<br>, mitochondrial<br>OS=Homo<br>sapiens<br>GN=FECH<br>PE=1 SV=2 -<br>[HEMH_HUMAN]                                                                                                                                                                                                                                                                                | 0.76  | 1 | 1  | 1  | 1  | 0.878 | 0.862 | 0.726 | 0.958 | 1.79  | 0.76  | 1  | 1  | 1053 | 117.6 | 5.86 |
| P22830 | Piezo-type<br>mechanosensiti<br>ve ion channel<br>component 1<br>OS=Homo<br>sapiens<br>GN=PIEZO1<br>PE=1 SV=4 -<br>[PIEZ1_HUMAN<br>]                                                                                                                                                                                                                                             | 23.64 | 1 | 10 | 10 | 37 | 0.671 | 0.865 | 1.017 | 0.958 | 89.62 | 23.64 | 16 | 37 | 423  | 47.8  | 8.73 |
| Q92508 | Epidermal<br>growth factor-<br>like protein 6<br>OS=Homo<br>sapiens<br>GN=EGFL6<br>PE=2 SV=1 -<br>[EGFL6_HUMAN<br>]                                                                                                                                                                                                                                                              | 4.56  | 1 | 9  | 10 | 41 | 1.288 | 0.635 | 0.754 | 0.958 | 96.03 | 4.56  | 16 | 41 | 2521 | 286.6 | 7.47 |
| Q81UX8 | Mannose-6-<br>phosphate<br>isomerase<br>OS=Homo<br>sapiens<br>GN=MPI PE=1<br>SV=2 -<br>[MPI_HUMAN]                                                                                                                                                                                                                                                                               | 1.27  | 1 | 1  | 1  | 5  | 0.718 | 1.100 | 0.828 | 0.958 | 14.65 | 1.27  | 1  | 5  | 553  | 61.3  | 8.06 |
| P34949 | Collagen alpha-<br>2(IV) chain<br>OS=Homo<br>sapiens<br>GN=COL4A2<br>PE=1 SV=4 -<br>[CO4A2_HUMA<br>N]<br>Tuberin<br>OS=Homo<br>sapiens<br>GN=TSC2<br>PE=1 SV=2 -<br>[TSC2_HUMAN]                                                                                                                                                                                                 | 23.17 | 1 | 8  | 8  | 18 | 0.824 | 1.033 | 0.760 | 0.958 | 47.33 | 23.17 | 10 | 18 | 423  | 46.6  | 5.95 |
| P08572 | Collagen alpha-<br>2(IV) chain<br>OS=Homo<br>sapiens<br>GN=COL4A2<br>PE=1 SV=4 -<br>[CO4A2_HUMA<br>N]<br>Tuberin<br>OS=Homo<br>sapiens<br>GN=TSC2<br>PE=1 SV=2 -<br>[TSC2_HUMAN]                                                                                                                                                                                                 | 5.14  | 1 | 6  | 6  | 16 | 0.827 | 1.014 | 1.700 | 0.958 | 43.37 | 5.14  | 9  | 16 | 1712 | 167.4 | 8.66 |
| P49815 | Tuberin<br>OS=Homo<br>sapiens<br>GN=TSC2<br>PE=1 SV=2 -<br>[TSC2_HUMAN]                                                                                                                                                                                                                                                                                                          | 5.26  | 1 | 8  | 8  | 22 | 0.884 | 1.062 | 1.078 | 0.958 | 49.96 | 5.26  | 13 | 22 | 1807 | 200.5 | 7.31 |

|        |                                                                                                                  |       |   |    |    |     |       |       |       |       |        |       |    |     |      |       |      |
|--------|------------------------------------------------------------------------------------------------------------------|-------|---|----|----|-----|-------|-------|-------|-------|--------|-------|----|-----|------|-------|------|
| P29144 | Tripeptidyl-peptidase 2<br>OS=Homo sapiens<br>GN=TPP2<br>PE=1 SV=4 - [TPP2_HUMAN]                                | 33.55 | 1 | 36 | 36 | 134 | 0.945 | 0.950 | 0.880 | 0.958 | 317.68 | 33.55 | 55 | 134 | 1249 | 138.3 | 6.32 |
| Q9UNK0 | Syntaxin-8<br>OS=Homo sapiens<br>GN=STX8<br>PE=1 SV=2 - [STX8_HUMAN]                                             | 29.66 | 1 | 6  | 6  | 28  | 0.809 | 0.811 | 0.867 | 0.958 | 69.56  | 29.66 | 10 | 28  | 236  | 26.9  | 4.98 |
| Q5T955 | Coiled-coil domain-containing protein 18<br>OS=Homo sapiens<br>GN=CCDC18<br>PE=2 SV=1 - [CCDC18_HUMAN]           | 2.27  | 1 | 2  | 4  | 12  | 1.257 | 1.043 | 0.872 | 0.958 | 26.73  | 2.27  | 4  | 12  | 1454 | 168.9 | 5.66 |
| O14617 | AP-3 complex subunit delta-1<br>OS=Homo sapiens<br>GN=AP3D1<br>PE=1 SV=1 - [AP3D1_HUMAN]                         | 14.40 | 1 | 15 | 15 | 47  | 0.981 | 0.970 | 1.143 | 0.959 | 97.96  | 14.40 | 22 | 47  | 1153 | 130.1 | 8.48 |
| Q13177 | Serine/threonine-protein kinase PAK 2<br>OS=Homo sapiens<br>GN=PAK2<br>PE=1 SV=3 - [PAK2_HUMAN]                  | 42.56 | 1 | 16 | 20 | 101 | 1.031 | 1.010 | 0.912 | 0.959 | 257.43 | 42.56 | 32 | 101 | 524  | 58.0  | 5.96 |
| Q8TBA6 | Golgin subfamily A member 5<br>OS=Homo sapiens<br>GN=GOLGA5<br>PE=1 SV=3 - [GOLGA5_HUMAN]                        | 33.11 | 1 | 21 | 21 | 70  | 0.798 | 0.975 | 0.946 | 0.959 | 167.53 | 33.11 | 32 | 70  | 731  | 83.0  | 5.83 |
| Q8WZA0 | Protein LZIC<br>OS=Homo sapiens<br>GN=LZIC PE=1 SV=1 - [LZIC_HUMAN]                                              | 32.63 | 1 | 7  | 7  | 24  | 1.032 | 1.172 | 1.043 | 0.959 | 47.50  | 32.63 | 12 | 24  | 190  | 21.5  | 4.94 |
| Q99943 | 1-acyl-sn-glycerol-3-phosphate acyltransferase alpha<br>OS=Homo sapiens<br>GN=AGPAT1<br>PE=1 SV=2 - [PLCA_HUMAN] | 10.60 | 1 | 2  | 2  | 4   | 3.550 | 1.786 | 2.661 | 0.959 | 8.30   | 10.60 | 3  | 4   | 283  | 31.7  | 9.38 |
| Q9BQ51 | Programmed cell death 1 ligand 2<br>OS=Homo sapiens<br>GN=PDCD1LG2<br>PE=1 SV=2 - [PD1L2_HUMAN]                  | 9.16  | 1 | 2  | 2  | 3   | 2.730 | 0.450 | 0.698 | 0.959 | 9.51   | 9.16  | 2  | 3   | 273  | 30.9  | 8.03 |

|        |                                                                                                                |       |     |    |    |     |       |       |       |       |        |       |    |     |      |       |      |
|--------|----------------------------------------------------------------------------------------------------------------|-------|-----|----|----|-----|-------|-------|-------|-------|--------|-------|----|-----|------|-------|------|
| Q9BZF1 | Oxysterol-binding protein-related protein 8 OS=Homo sapiens<br>GN=OSBP18<br>PE=1 SV=3 - [OSBP18_HUMAN]         | 17.77 | 1   | 12 | 13 | 40  | 0.772 | 1.056 | 0.889 | 0.959 | 99.53  | 17.77 | 20 | 40  | 889  | 101.1 | 6.96 |
| Q7Z7L7 | Protein zer-1 homolog OS=Homo sapiens<br>GN=ZER1<br>PE=1 SV=1 - [ZER1_HUMAN]                                   | 1.04  | 1   | 1  | 1  | 2   | 1.141 | 0.916 | 1.158 | 0.959 | 0.00   | 1.04  | 1  | 2   | 766  | 88.1  | 5.62 |
| Q9UQ80 | Proliferation-associated protein 2G4 OS=Homo sapiens<br>GN=PA2G4<br>PE=1 SV=3 - [PA2G4_HUMAN]                  | 41.37 | 2   | 16 | 17 | 141 | 0.814 | 0.936 | 0.741 | 0.959 | 340.19 | 41.37 | 27 | 141 | 394  | 43.8  | 6.55 |
| O95433 | Activator of 90 kDa heat shock protein ATPase homolog 1 OS=Homo sapiens<br>GN=AHS1<br>PE=1 SV=1 - [AHS1_HUMAN] | 52.66 | 1   | 16 | 16 | 113 | 0.867 | 0.800 | 0.955 | 0.959 | 364.95 | 52.66 | 27 | 113 | 338  | 38.3  | 5.53 |
| P28715 | DNA repair protein complementing XP-G cells OS=Homo sapiens<br>GN=ERCC5<br>PE=1 SV=3 - [ERCC5_HUMAN]           | 0.84  | 1   | 1  | 1  | 1   | 1.277 | 1.130 | 1.280 | 0.959 | 2.56   | 0.84  | 1  | 1   | 1186 | 133.0 | 5.22 |
| Q96SU4 | Oxysterol-binding protein-related protein 9 OS=Homo sapiens<br>GN=OSBP19<br>PE=1 SV=2 - [OSBP19_HUMAN]         | 13.59 | 1   | 6  | 7  | 10  | 0.784 | 0.955 | 0.819 | 0.959 | 25.92  | 13.59 | 9  | 10  | 736  | 83.1  | 6.18 |
| Q9Y6B6 | GTP-binding protein SAR1b OS=Homo sapiens<br>GN=SAR1B<br>PE=1 SV=1 - [SAR1B_HUMAN]                             | 32.83 | 1   | 3  | 5  | 25  | 1.264 | 0.793 | 0.987 | 0.959 | 69.20  | 32.83 | 9  | 25  | 198  | 22.4  | 6.11 |
| Q8TE02 | Elongator complex protein 5 OS=Homo sapiens<br>GN=ELP5 PE=1 SV=2 - [ELP5_HUMAN]                                | 4.43  | 1   | 1  | 1  | 4   | 0.746 | 0.944 | 1.117 | 0.959 | 12.76  | 4.43  | 2  | 4   | 316  | 34.8  | 4.97 |
| Q14590 | Zinc finger protein 235 OS=Homo sapiens<br>GN=ZNF235<br>PE=2 SV=3 - [ZNF235_HUMAN]                             | 11.11 | 120 | 2  | 4  | 7   | 0.748 | 1.206 | 0.901 | 0.959 | 2.55   | 11.11 | 5  | 7   | 738  | 83.9  | 8.56 |

|        |                                                                                                                |       |   |    |    |     |       |       |       |       |        |       |    |     |      |       |       |
|--------|----------------------------------------------------------------------------------------------------------------|-------|---|----|----|-----|-------|-------|-------|-------|--------|-------|----|-----|------|-------|-------|
| P51809 | Vesicle-associated membrane protein 7<br>OS=Homo sapiens<br>GN=VAMP7<br>PE=1 SV=3 - [VAMP7_HUMAN]              | 16.82 | 1 | 3  | 4  | 7   | 0.918 | 0.820 | 0.944 | 0.959 | 12.00  | 16.82 | 6  | 7   | 220  | 24.9  | 8.60  |
| Q6T4R5 | Nance-Horan syndrome protein<br>OS=Homo sapiens<br>GN=NHS PE=1 SV=2 - [NHS_HUMAN]                              | 2.42  | 1 | 3  | 3  | 5   | 1.077 | 1.036 | 1.104 | 0.959 | 11.44  | 2.42  | 4  | 5   | 1651 | 179.0 | 6.86  |
| O43516 | WAS/WASL-interacting protein family member 1<br>OS=Homo sapiens<br>GN=WIPF1<br>PE=1 SV=3 - [WIPF1_HUMAN]       | 15.51 | 1 | 5  | 5  | 16  | 1.089 | 1.662 | 1.433 | 0.960 | 25.04  | 15.51 | 8  | 16  | 503  | 51.2  | 11.47 |
| Q9H5V9 | UPF0428 protein<br>CXorf56<br>OS=Homo sapiens<br>GN=CXorf56<br>PE=1 SV=1 - [CX056_HUMAN]                       | 3.15  | 1 | 1  | 1  | 1   | 1.701 | 0.920 | 1.076 | 0.960 | 2.56   | 3.15  | 1  | 1   | 222  | 25.6  | 8.73  |
| Q4V328 | GRIP1-associated protein 1<br>OS=Homo sapiens<br>GN=GRIPAP1<br>PE=1 SV=1 - [GRAP1_HUMAN]                       | 32.94 | 2 | 24 | 24 | 74  | 1.127 | 1.239 | 1.231 | 0.960 | 167.76 | 32.94 | 36 | 74  | 841  | 95.9  | 5.11  |
| Q9UHB6 | LIM domain and actin-binding protein 1<br>OS=Homo sapiens<br>GN=LIMA1<br>PE=1 SV=1 - [LIMA1_HUMAN]             | 44.01 | 1 | 33 | 33 | 184 | 0.994 | 0.872 | 0.650 | 0.960 | 507.22 | 44.01 | 48 | 184 | 759  | 85.2  | 6.84  |
| Q9UBP9 | PTB domain-containing engulfment adapter protein 1<br>OS=Homo sapiens<br>GN=GULP1<br>PE=1 SV=1 - [GULP1_HUMAN] | 25.33 | 1 | 9  | 9  | 26  | 0.786 | 1.222 | 0.978 | 0.960 | 49.64  | 25.33 | 15 | 26  | 304  | 34.5  | 7.90  |
| Q9Y2K6 | Ubiquitin carboxyl-terminal hydrolase 20<br>OS=Homo sapiens<br>GN=USP20<br>PE=1 SV=2 - [UBP20_HUMAN]           | 2.08  | 1 | 1  | 1  | 2   | 0.767 | 1.240 | 1.291 | 0.960 | 4.14   | 2.08  | 1  | 2   | 914  | 101.9 | 6.11  |

|        |                                                                                                            |       |   |    |    |     |       |       |       |       |        |       |    |     |      |       |       |
|--------|------------------------------------------------------------------------------------------------------------|-------|---|----|----|-----|-------|-------|-------|-------|--------|-------|----|-----|------|-------|-------|
| Q9HBM0 | Vezatin<br>OS=Homo sapiens<br>GN=VEZT<br>PE=1 SV=3 - [VEZA_HUMAN]                                          | 8.60  | 1 | 6  | 7  | 13  | 1.067 | 1.394 | 1.198 | 0.960 | 29.68  | 8.60  | 9  | 13  | 779  | 88.6  | 5.20  |
| Q14CM0 | FERM and PDZ domain-containing protein 4<br>OS=Homo sapiens<br>GN=FRMPD4<br>PE=1 SV=1 - [FRPD4_HUMAN]      | 1.74  | 1 | 1  | 2  | 2   | 0.372 | 0.699 | 1.226 | 0.960 | 2.24   | 1.74  | 2  | 2   | 1322 | 144.3 | 5.25  |
| Q9HCJ1 | Progressive ankylosis protein homolog<br>OS=Homo sapiens<br>GN=ANKH<br>PE=1 SV=2 - [ANKH_HUMAN]            | 4.07  | 1 | 1  | 2  | 5   | 2.087 | 0.300 | 0.384 | 0.960 | 4.62   | 4.07  | 3  | 5   | 492  | 54.2  | 7.88  |
| P55196 | Afadin<br>OS=Homo sapiens<br>GN=MLT4<br>PE=1 SV=3 - [AFAD_HUMAN]                                           | 5.76  | 1 | 10 | 10 | 17  | 1.039 | 1.778 | 1.374 | 0.960 | 31.33  | 5.76  | 15 | 17  | 1824 | 206.7 | 6.47  |
| P18621 | 60S ribosomal protein L17<br>OS=Homo sapiens<br>GN=RPL17<br>PE=1 SV=3 - [RL17_HUMAN]                       | 44.02 | 1 | 10 | 11 | 188 | 0.826 | 0.951 | 0.823 | 0.961 | 448.26 | 44.02 | 20 | 188 | 184  | 21.4  | 10.17 |
| P28070 | Proteasome subunit beta type-4<br>OS=Homo sapiens<br>GN=PSMB4<br>PE=1 SV=4 - [PSB4_HUMAN]                  | 38.26 | 1 | 7  | 7  | 38  | 0.977 | 0.983 | 1.030 | 0.961 | 114.32 | 38.26 | 13 | 38  | 264  | 29.2  | 5.97  |
| Q9Y5V3 | Melanoma-associated antigen D1<br>OS=Homo sapiens<br>GN=MAGED1<br>PE=1 SV=3 - [MAGD1_HUMAN]                | 18.77 | 2 | 9  | 10 | 37  | 0.725 | 0.805 | 0.861 | 0.961 | 82.17  | 18.77 | 15 | 37  | 778  | 86.1  | 5.83  |
| Q96HN2 | Putative adenosylhomocysteinase 3<br>OS=Homo sapiens<br>GN=AHCYL2<br>PE=1 SV=1 - [SAHH3_HUMAN]             | 22.91 | 1 | 2  | 17 | 51  | 1.102 | 1.106 | 1.092 | 0.961 | 86.92  | 22.91 | 28 | 51  | 611  | 66.7  | 7.36  |
| Q96QK1 | Vacuolar protein sorting-associated protein 35<br>OS=Homo sapiens<br>GN=VPS35<br>PE=1 SV=2 - [VPS35_HUMAN] | 30.28 | 1 | 22 | 23 | 101 | 1.030 | 0.995 | 0.978 | 0.961 | 248.52 | 30.28 | 37 | 101 | 796  | 91.6  | 5.49  |

|        |                                                                                                                         |       |   |    |    |     |       |       |       |       |         |       |    |     |      |       |      |
|--------|-------------------------------------------------------------------------------------------------------------------------|-------|---|----|----|-----|-------|-------|-------|-------|---------|-------|----|-----|------|-------|------|
| Q9C0B0 | RING finger protein unkept homolog<br>OS=Homo sapiens<br>GN=UNK PE=1<br>SV=2 - [UNK_HUMAN]                              | 2.59  | 1 | 2  | 2  | 3   | 1.482 | 1.080 | 1.056 | 0.961 | 7.30    | 2.59  | 3  | 3   | 810  | 88.0  | 6.86 |
| P09382 | Galectin-1<br>OS=Homo sapiens<br>GN=LGALS1<br>PE=1 SV=2 - [LEG1_HUMAN]                                                  | 82.22 | 1 | 14 | 14 | 703 | 1.185 | 1.012 | 1.105 | 0.961 | 1983.67 | 82.22 | 24 | 703 | 135  | 14.7  | 5.50 |
| Q8IWR0 | Zinc finger CCCH domain-containing protein 7A<br>OS=Homo sapiens<br>GN=ZC3H7A<br>PE=1 SV=1 - [Z3H7A_HUMAN]              | 7.31  | 1 | 6  | 7  | 14  | 0.980 | 0.921 | 1.008 | 0.961 | 21.96   | 7.31  | 10 | 14  | 971  | 110.5 | 7.30 |
| O75094 | Slit homolog 3 protein<br>OS=Homo sapiens<br>GN=SLIT3<br>PE=2 SV=3 - [SLIT3_HUMAN]                                      | 1.77  | 1 | 2  | 2  | 5   | 0.446 | 1.054 | 1.002 | 0.961 | 10.19   | 1.77  | 3  | 5   | 1523 | 167.6 | 7.65 |
| Q7L1Q6 | Basic leucine zipper and W2 domain-containing protein 1<br>OS=Homo sapiens<br>GN=BZW1<br>PE=1 SV=1 - [BZW1_HUMAN]       | 34.61 | 1 | 16 | 17 | 93  | 0.913 | 1.014 | 0.901 | 0.961 | 176.17  | 34.61 | 27 | 93  | 419  | 48.0  | 5.92 |
| Q9BX68 | Histidine triad nucleotide-binding protein 2, mitochondrial<br>OS=Homo sapiens<br>GN=HINT2<br>PE=1 SV=1 - [HINT2_HUMAN] | 51.53 | 1 | 6  | 6  | 39  | 1.264 | 1.339 | 1.117 | 0.961 | 87.37   | 51.53 | 10 | 39  | 163  | 17.2  | 9.16 |
| Q9BTD3 | Transmembrane protein 121<br>OS=Homo sapiens<br>GN=TMEM121<br>PE=2 SV=1 - [TM121_HUMAN]                                 | 2.82  | 1 | 1  | 1  | 3   | 1.057 | 1.041 | 0.811 | 0.961 | 1.77    | 2.82  | 1  | 3   | 319  | 35.8  | 9.26 |
| Q9Y217 | Myotubularin-related protein 6<br>OS=Homo sapiens<br>GN=MTMR6<br>PE=1 SV=3 - [MTMR6_HUMAN]                              | 15.30 | 2 | 8  | 9  | 22  | 0.846 | 0.925 | 1.065 | 0.961 | 51.11   | 15.30 | 15 | 22  | 621  | 71.9  | 7.66 |



|        |                                                                                                                                                                                                                                                                                                                |       |   |    |    |    |       |       |       |       |        |       |    |    |      |       |      |
|--------|----------------------------------------------------------------------------------------------------------------------------------------------------------------------------------------------------------------------------------------------------------------------------------------------------------------|-------|---|----|----|----|-------|-------|-------|-------|--------|-------|----|----|------|-------|------|
| Q9P275 | Ubiquitin<br>carboxyl-<br>terminal<br>hydrolase 36<br>OS=Homo<br>sapiens<br>GN=USP36<br>PE=1 SV=3 -<br>[UBP36_HUMAN<br>]<br>Rho GTPase-<br>activating<br>protein 22<br>OS=Homo<br>sapiens<br>GN=ARHGAP22<br>PE=1 SV=1 -<br>[RHG22_HUMAN<br>]<br>tRNA<br>(guanine(10)-<br>N2)-<br>methyltransfer<br>ase homolog | 2.23  | 1 | 2  | 2  | 2  | 0.950 | 0.244 | 0.613 | 0.961 | 2.71   | 2.23  | 2  | 2  | 1121 | 122.6 | 9.67 |
| Q7Z5H3 | OS=Homo<br>sapiens<br>GN=ARHGAP22<br>PE=1 SV=1 -<br>[RHG22_HUMAN<br>]<br>tRNA<br>(guanine(10)-<br>N2)-<br>methyltransfer<br>ase homolog                                                                                                                                                                        | 2.15  | 1 | 1  | 1  | 6  | 0.731 | 1.329 | 1.337 | 0.961 | 12.34  | 2.15  | 2  | 6  | 698  | 76.7  | 8.15 |
| Q7Z4G4 | OS=Homo<br>sapiens<br>GN=TRMT11<br>PE=1 SV=1 -<br>[TRM11_HUMA<br>N]                                                                                                                                                                                                                                            | 1.30  | 1 | 1  | 1  | 1  | 0.974 | 1.114 | 0.825 | 0.961 | 1.65   | 1.30  | 1  | 1  | 463  | 53.4  | 7.78 |
| Q9P2B4 | CTTNBP2 N-<br>terminal-like<br>protein<br>OS=Homo<br>sapiens<br>GN=CTTNBP2NL<br>PE=1 SV=2 -<br>[CT2NL_HUMAN<br>]                                                                                                                                                                                               | 44.91 | 1 | 26 | 27 | 69 | 1.070 | 1.101 | 1.038 | 0.962 | 156.89 | 44.91 | 40 | 69 | 639  | 70.1  | 8.06 |
| P14406 | Cytochrome c<br>oxidase subunit<br>7A2,<br>mitochondrial<br>OS=Homo<br>sapiens<br>GN=COX7A2<br>PE=1 SV=1 -<br>[CX7A2_HUMAN<br>]                                                                                                                                                                                | 27.71 | 1 | 2  | 2  | 20 | 1.080 | 0.598 | 0.607 | 0.962 | 51.60  | 27.71 | 4  | 20 | 83   | 9.4   | 9.76 |
| Q13615 | Myotubularin-<br>related protein<br>3 OS=Homo<br>sapiens<br>GN=MTMR3<br>PE=1 SV=3 -<br>[MTMR3_HUMA<br>N]                                                                                                                                                                                                       | 2.17  | 1 | 2  | 2  | 4  | 0.904 | 0.787 | 0.823 | 0.962 | 11.53  | 2.17  | 2  | 4  | 1198 | 133.5 | 5.80 |
| Q14677 | Clathrin<br>interactor 1<br>OS=Homo<br>sapiens<br>GN=CLINT1<br>PE=1 SV=1 -<br>[EPN4_HUMAN]                                                                                                                                                                                                                     | 27.36 | 1 | 15 | 15 | 63 | 1.078 | 1.082 | 0.950 | 0.962 | 176.75 | 27.36 | 24 | 63 | 625  | 68.2  | 6.42 |
| Q13126 | S-methyl-5'-<br>thioadenosine<br>phosphorylase<br>OS=Homo<br>sapiens<br>GN=MTAP<br>PE=1 SV=2 -<br>[MTAP_HUMAN]                                                                                                                                                                                                 | 35.69 | 1 | 8  | 8  | 25 | 0.873 | 0.701 | 0.768 | 0.962 | 61.70  | 35.69 | 11 | 25 | 283  | 31.2  | 7.18 |

|        |                                                                                                                 |       |   |    |    |     |       |       |       |       |        |       |    |     |      |       |       |
|--------|-----------------------------------------------------------------------------------------------------------------|-------|---|----|----|-----|-------|-------|-------|-------|--------|-------|----|-----|------|-------|-------|
| P18124 | 60S ribosomal protein L7<br>OS=Homo sapiens<br>GN=RPL7 PE=1 SV=1 - [RL7_HUMAN]                                  | 56.05 | 1 | 20 | 20 | 240 | 0.872 | 1.068 | 0.917 | 0.962 | 471.67 | 56.05 | 33 | 240 | 248  | 29.2  | 10.65 |
| Q92576 | PHD finger protein 3<br>OS=Homo sapiens<br>GN=PHF3 PE=1 SV=3 - [PHF3_HUMAN]                                     | 1.47  | 1 | 3  | 3  | 4   | 0.875 | 0.749 | 0.412 | 0.962 | 11.97  | 1.47  | 3  | 4   | 2039 | 229.3 | 6.96  |
| P31949 | Protein S100-A11 OS=Homo sapiens<br>GN=S100A11 PE=1 SV=2 - [S10AB_HUMAN]                                        | 45.71 | 1 | 6  | 6  | 244 | 1.114 | 0.865 | 1.038 | 0.962 | 753.90 | 45.71 | 11 | 244 | 105  | 11.7  | 7.12  |
| P05114 | Non-histone chromosomal protein HMG-14 OS=Homo sapiens<br>GN=HMGN1 PE=1 SV=3 - [HMGN1_HUMAN]                    | 43.00 | 1 | 6  | 6  | 29  | 1.295 | 1.254 | 1.201 | 0.962 | 69.65  | 43.00 | 9  | 29  | 100  | 10.7  | 9.60  |
| Q9BRJ6 | Uncharacterized protein C7orf50 OS=Homo sapiens<br>GN=C7orf50 PE=1 SV=1 - [CG050_HUMAN]                         | 17.01 | 1 | 2  | 2  | 7   | 0.790 | 1.287 | 0.936 | 0.963 | 22.04  | 17.01 | 4  | 7   | 194  | 22.1  | 9.64  |
| Q9NP85 | Podocin OS=Homo sapiens<br>GN=NPHS2 PE=1 SV=1 - [PODO_HUMAN]                                                    | 2.09  | 1 | 1  | 1  | 3   | 0.879 | 1.061 | 0.955 | 0.963 | 6.40   | 2.09  | 1  | 3   | 383  | 42.2  | 8.75  |
| Q9H6T3 | RNA polymerase II-associated protein 3 OS=Homo sapiens<br>GN=RPAP3 PE=1 SV=2 - [RPAP3_HUMAN]                    | 18.80 | 1 | 11 | 11 | 28  | 0.787 | 1.176 | 1.093 | 0.963 | 59.81  | 18.80 | 16 | 28  | 665  | 75.7  | 6.84  |
| Q9HIP3 | Oxysterol-binding protein-related protein 2 OS=Homo sapiens<br>GN=OSBPL2 PE=1 SV=1 - [OSBL2_HUMAN]              | 10.63 | 1 | 4  | 4  | 15  | 1.139 | 1.078 | 0.923 | 0.963 | 32.00  | 10.63 | 6  | 15  | 480  | 55.2  | 6.35  |
| Q9Y5B0 | RNA polymerase II subunit A C-terminal domain phosphatase OS=Homo sapiens<br>GN=CTDP1 PE=1 SV=3 - [CTDP1_HUMAN] | 12.70 | 1 | 8  | 8  | 16  | 1.088 | 1.041 | 1.012 | 0.963 | 35.68  | 12.70 | 12 | 16  | 961  | 104.3 | 5.27  |

|        |                                                                                                                      |       |   |    |    |     |       |       |       |       |        |       |    |     |      |       |       |
|--------|----------------------------------------------------------------------------------------------------------------------|-------|---|----|----|-----|-------|-------|-------|-------|--------|-------|----|-----|------|-------|-------|
| Q9H4A3 | Serine/threonine-protein kinase WNK1<br>OS=Homo sapiens<br>GN=WNK1<br>PE=1 SV=2 - [WNK1_HUMAN]                       | 10.29 | 1 | 20 | 25 | 71  | 1.123 | 1.092 | 0.976 | 0.963 | 156.57 | 10.29 | 42 | 71  | 2382 | 250.6 | 6.34  |
| Q9HD33 | 39S ribosomal protein L47, mitochondrial<br>OS=Homo sapiens<br>GN=MRPL47<br>PE=1 SV=2 - [RM47_HUMAN]                 | 20.80 | 1 | 7  | 7  | 16  | 0.831 | 1.051 | 0.886 | 0.963 | 27.71  | 20.80 | 11 | 16  | 250  | 29.4  | 10.37 |
| P40429 | 60S ribosomal protein L13a<br>OS=Homo sapiens<br>GN=RPL13A<br>PE=1 SV=2 - [RL13A_HUMAN]                              | 36.45 | 2 | 11 | 11 | 94  | 0.969 | 0.993 | 0.908 | 0.963 | 166.73 | 36.45 | 17 | 94  | 203  | 23.6  | 10.93 |
| O95336 | 6-phosphogluconolactonase<br>OS=Homo sapiens<br>GN=PGLS PE=1 SV=2 - [6PGL_HUMAN]                                     | 52.71 | 1 | 11 | 11 | 55  | 0.978 | 0.977 | 0.917 | 0.963 | 115.40 | 52.71 | 18 | 55  | 258  | 27.5  | 6.05  |
| Q8WW15 | Choline transporter-like protein 1<br>OS=Homo sapiens<br>GN=SLC44A1<br>PE=1 SV=1 - [CTL1_HUMAN]                      | 1.83  | 1 | 1  | 1  | 1   | 1.393 | 1.346 | 0.668 | 0.963 | 0.00   | 1.83  | 1  | 1   | 657  | 73.3  | 8.60  |
| O43292 | Glycosylphosphatidylinositol anchor attachment 1 protein<br>OS=Homo sapiens<br>GN=GPAA1<br>PE=1 SV=3 - [GPAA1_HUMAN] | 2.09  | 1 | 1  | 1  | 6   | 0.858 | 0.755 | 0.704 | 0.963 | 15.96  | 2.09  | 2  | 6   | 621  | 67.6  | 8.06  |
| Q96DL1 | NXPE family member 2<br>OS=Homo sapiens<br>GN=NXPE2<br>PE=2 SV=2 - [NXPE2_HUMAN]                                     | 1.25  | 1 | 1  | 1  | 1   | 1.770 | 0.406 | 1.737 | 0.963 | 0.00   | 1.25  | 1  | 1   | 559  | 64.9  | 8.60  |
| Q96BZ9 | TBC1 domain family member 20<br>OS=Homo sapiens<br>GN=TBC1D20<br>PE=1 SV=1 - [TBC20_HUMAN]                           | 12.90 | 1 | 6  | 6  | 10  | 0.920 | 0.775 | 1.052 | 0.963 | 19.01  | 12.90 | 10 | 10  | 403  | 45.8  | 6.86  |
| P60842 | Eukaryotic initiation factor 4A-1<br>OS=Homo sapiens<br>GN=EIF4A1<br>PE=1 SV=1 - [IF4A1_HUMAN]                       | 56.40 | 1 | 11 | 24 | 361 | 0.890 | 0.829 | 0.824 | 0.963 | 912.69 | 56.40 | 42 | 361 | 406  | 46.1  | 5.48  |

|        |                                                                                                                          |       |   |    |    |    |       |       |       |       |        |       |    |     |      |       |      |
|--------|--------------------------------------------------------------------------------------------------------------------------|-------|---|----|----|----|-------|-------|-------|-------|--------|-------|----|-----|------|-------|------|
| O15111 | Inhibitor of nuclear factor kappa-B kinase subunit alpha<br>OS=Homo sapiens<br>GN=CHUK<br>PE=1 SV=2 - [IKKA_HUMAN]       | 6.31  | 1 | 4  | 4  | 6  | 0.850 | 0.733 | 1.042 | 0.963 | 11.20  | 6.31  | 6  | 6   | 745  | 84.6  | 6.73 |
| P54819 | Adenylate kinase 2, mitochondrial<br>OS=Homo sapiens<br>GN=AK2 PE=1 SV=2 - [KAD2_HUMAN]                                  | 41.42 | 1 | 10 | 10 | 62 | 0.829 | 1.075 | 0.808 | 0.964 | 194.38 | 41.42 | 18 | 62  | 239  | 26.5  | 7.81 |
| Q7Z4N8 | Prolyl 4-hydroxylase subunit alpha-3<br>OS=Homo sapiens<br>GN=P4HA3<br>PE=1 SV=1 - [P4HA3_HUMAN]                         | 13.24 | 1 | 6  | 6  | 9  | 0.964 | 1.300 | 0.495 | 0.964 | 25.70  | 13.24 | 8  | 9   | 544  | 61.1  | 6.49 |
| Q96ER3 | Protein SAAL1<br>OS=Homo sapiens<br>GN=SAAL1<br>PE=1 SV=2 - [SAAL1_HUMAN]                                                | 4.64  | 1 | 2  | 2  | 2  |       | 2.862 | 0.964 | 5.73  | 4.64   | 2     | 2  | 474 | 53.5 | 4.50  |      |
| Q16827 | Receptor-type tyrosine-protein phosphatase O<br>OS=Homo sapiens<br>GN=PTPRO<br>PE=1 SV=2 - [PTPRO_HUMAN]                 | 0.49  | 1 | 1  | 1  | 2  | 0.704 | 0.809 | 0.672 | 0.964 | 3.73   | 0.49  | 1  | 2   | 1216 | 138.3 | 6.01 |
| Q8IY31 | Intraflagellar transport protein 20 homolog<br>OS=Homo sapiens<br>GN=IFT20<br>PE=1 SV=1 - [IFT20_HUMAN]                  | 10.61 | 1 | 1  | 1  | 2  | 0.675 | 0.708 | 1.183 | 0.964 | 4.72   | 10.61 | 2  | 2   | 132  | 15.3  | 5.12 |
| Q6ZMW3 | Echinoderm microtubule-associated protein-like 6<br>OS=Homo sapiens<br>GN=EML6<br>PE=2 SV=2 - [EMAL6_HUMAN]              | 1.94  | 1 | 3  | 4  | 5  | 0.766 | 1.119 | 1.063 | 0.964 | 7.76   | 1.94  | 4  | 5   | 1958 | 217.8 | 7.44 |
| Q9Y6M9 | NADH dehydrogenase [ubiquinone] 1 beta subcomplex subunit 9<br>OS=Homo sapiens<br>GN=NDUFB9<br>PE=1 SV=3 - [NDUB9_HUMAN] | 40.22 | 1 | 7  | 7  | 26 | 0.668 | 0.966 | 0.767 | 0.964 | 70.85  | 40.22 | 12 | 26  | 179  | 21.8  | 8.38 |

|        |                                                                                                                                 |       |   |    |    |     |       |       |       |       |        |       |    |     |       |       |       |
|--------|---------------------------------------------------------------------------------------------------------------------------------|-------|---|----|----|-----|-------|-------|-------|-------|--------|-------|----|-----|-------|-------|-------|
| Q5VZ89 | DENN domain-<br>containing<br>protein 4C<br>OS=Homo<br>sapiens<br>GN=DENND4C<br>PE=1 SV=2 -<br>[DEN4C_HUMAN<br>]                | 3.59  | 1 | 5  | 5  | 9   | 1.039 | 1.170 | 1.084 | 0.964 | 15.88  | 3.59  | 7  | 9   | 1673  | 186.7 | 6.86  |
| Q96C11 | FGGY<br>carbohydrate<br>kinase domain-<br>containing<br>protein<br>OS=Homo<br>sapiens<br>GN=FGGY<br>PE=1 SV=2 -<br>[FGGY_HUMAN] | 4.54  | 1 | 2  | 2  | 3   | 0.825 | 0.853 | 0.857 | 0.964 | 5.14   | 4.54  | 3  | 3   | 551   | 60.0  | 6.35  |
| Q8NEY1 | Neuron<br>navigator 1<br>OS=Homo<br>sapiens<br>GN=NAV1<br>PE=1 SV=2 -<br>[NAV1_HUMAN]                                           | 10.44 | 1 | 16 | 16 | 34  | 1.206 | 0.855 | 1.199 | 0.964 | 86.68  | 10.44 | 25 | 34  | 1877  | 202.3 | 8.07  |
| Q8IXM3 | 39S ribosomal<br>protein L41,<br>mitochondrial<br>OS=Homo<br>sapiens<br>GN=MRPL41<br>PE=1 SV=1 -<br>[RM41_HUMAN]                | 15.33 | 1 | 2  | 2  | 8   | 0.681 | 1.052 | 0.943 | 0.964 | 13.54  | 15.33 | 4  | 8   | 137   | 15.4  | 9.57  |
| P49427 | Ubiquitin-<br>conjugating<br>enzyme E2 R1<br>OS=Homo<br>sapiens<br>GN=CDC34<br>PE=1 SV=2 -<br>[UB2R1_HUMAN<br>]                 | 11.02 | 1 | 2  | 3  | 11  | 0.822 | 1.291 | 1.195 | 0.964 | 18.37  | 11.02 | 5  | 11  | 236   | 26.7  | 4.54  |
| Q96A65 | Exocyst complex<br>component 4<br>OS=Homo<br>sapiens<br>GN=EXOC4<br>PE=1 SV=1 -<br>[EXOC4_HUMA<br>N]                            | 23.10 | 3 | 20 | 21 | 56  | 1.098 | 0.964 | 0.956 | 0.964 | 147.18 | 23.10 | 29 | 56  | 974   | 110.4 | 6.49  |
| Q13042 | Cell division<br>cycle protein<br>16 homolog<br>OS=Homo<br>sapiens<br>GN=CDC16<br>PE=1 SV=2 -<br>[CDC16_HUMAN<br>]              | 6.61  | 1 | 4  | 4  | 9   | 0.829 | 0.762 | 0.812 | 0.964 | 23.86  | 6.61  | 5  | 9   | 620   | 71.6  | 5.85  |
| Q8WZ42 | Titin OS=Homo<br>sapiens<br>GN=TTN PE=1<br>SV=4 -<br>[TITIN_HUMAN]                                                              | 1.11  | 3 | 24 | 30 | 36  | 1.032 | 0.864 | 0.781 | 0.964 | 60.30  | 1.11  | 30 | 36  | 34350 | ####  | 6.35  |
| P27635 | 60S ribosomal<br>protein L10<br>OS=Homo<br>sapiens<br>GN=RPL10<br>PE=1 SV=4 -<br>[RL10_HUMAN]                                   | 46.73 | 2 | 13 | 13 | 121 | 0.932 | 0.837 | 0.791 | 0.964 | 380.24 | 46.73 | 19 | 121 | 214   | 24.6  | 10.08 |

|        |                                                                                                                              |       |   |    |    |     |       |       |       |       |        |       |    |     |      |       |       |
|--------|------------------------------------------------------------------------------------------------------------------------------|-------|---|----|----|-----|-------|-------|-------|-------|--------|-------|----|-----|------|-------|-------|
| P50914 | 60S ribosomal protein L14<br>OS=Homo sapiens<br>GN=RPL14<br>PE=1 SV=4 - [RPL14_HUMAN]                                        | 50.70 | 2 | 14 | 14 | 143 | 0.835 | 1.051 | 1.014 | 0.964 | 288.19 | 50.70 | 18 | 143 | 215  | 23.4  | 10.93 |
| Q6LXX5 | Inter-alpha-trypsin inhibitor heavy chain H6<br>OS=Homo sapiens<br>GN=ITIH6<br>PE=2 SV=1 - [ITIH6_HUMAN]                     | 0.46  | 1 | 1  | 1  | 1   | 0.636 | 0.412 | 0.574 | 0.965 | 0.00   | 0.46  | 1  | 1   | 1313 | 143.1 | 9.01  |
| O60469 | Down syndrome cell adhesion molecule<br>OS=Homo sapiens<br>GN=DSCAM<br>PE=1 SV=2 - [DSCAM_HUMAN]                             | 3.23  | 1 | 3  | 5  | 6   | 0.966 | 0.701 | 0.792 | 0.965 | 10.75  | 3.23  | 5  | 6   | 2012 | 222.1 | 7.68  |
| Q9NRW7 | Vacuolar protein sorting-associated protein 45<br>OS=Homo sapiens<br>GN=VPS45<br>PE=1 SV=1 - [VPS45_HUMAN]                   | 16.14 | 1 | 9  | 9  | 23  | 0.999 | 0.663 | 0.645 | 0.965 | 61.95  | 16.14 | 15 | 23  | 570  | 65.0  | 8.24  |
| P46782 | 40S ribosomal protein S5<br>OS=Homo sapiens<br>GN=RPS5<br>PE=1 SV=4 - [RPS5_HUMAN]                                           | 36.76 | 1 | 10 | 10 | 96  | 0.857 | 1.000 | 0.951 | 0.965 | 251.15 | 36.76 | 19 | 96  | 204  | 22.9  | 9.72  |
| Q96KH6 | Uncharacterized protein C18orf12<br>OS=Homo sapiens<br>GN=C18orf12<br>PE=2 SV=1 - [C18orf12_HUMAN]                           | 9.55  | 1 | 1  | 1  | 1   | 2.424 | 1.169 | 1.855 | 0.965 | 0.00   | 9.55  | 1  | 1   | 178  | 19.7  | 6.61  |
| Q9P266 | Junctional protein associated with coronary artery disease<br>OS=Homo sapiens<br>GN=KIAA1462<br>PE=1 SV=3 - [KIAA1462_HUMAN] | 10.23 | 1 | 10 | 10 | 24  | 1.158 | 0.628 | 1.593 | 0.965 | 50.95  | 10.23 | 17 | 24  | 1359 | 148.3 | 7.09  |
| O60884 | DnaJ homolog subfamily A member 2<br>OS=Homo sapiens<br>GN=DNAJ2<br>PE=1 SV=1 - [DNAJ2_HUMAN]                                | 37.38 | 1 | 11 | 11 | 52  | 0.906 | 1.025 | 0.960 | 0.965 | 137.32 | 37.38 | 18 | 52  | 412  | 45.7  | 6.48  |

|        |                                                                                                                                                  |       |   |    |    |     |       |       |       |       |        |       |    |     |     |      |      |
|--------|--------------------------------------------------------------------------------------------------------------------------------------------------|-------|---|----|----|-----|-------|-------|-------|-------|--------|-------|----|-----|-----|------|------|
| Q8WV92 | MIT domain-containing protein 1<br>OS=Homo sapiens<br>GN=MITD1<br>PE=1 SV=1 - [MITD1_HUMAN]                                                      | 4.02  | 1 | 1  | 1  | 4   | 0.833 | 1.369 | 0.983 | 0.965 | 6.08   | 4.02  | 2  | 4   | 249 | 29.3 | 8.00 |
| Q15008 | 26S proteasome non-ATPase regulatory subunit 6<br>OS=Homo sapiens<br>GN=PSMD6<br>PE=1 SV=1 - [PSMD6_HUMAN]<br>Peptidyl-prolyl isomerase<br>FKBP3 | 40.36 | 1 | 20 | 20 | 81  | 0.947 | 1.046 | 0.958 | 0.965 | 203.24 | 40.36 | 33 | 81  | 389 | 45.5 | 5.62 |
| Q00688 | OS=Homo sapiens<br>GN=FKBP3<br>PE=1 SV=1 - [FKBP3_HUMAN]                                                                                         | 71.43 | 1 | 19 | 19 | 78  | 1.306 | 1.560 | 1.098 | 0.965 | 216.39 | 71.43 | 28 | 78  | 224 | 25.2 | 9.28 |
| Q9NQ88 | Fructose-2,6-bisphosphatase<br>TIGAR<br>OS=Homo sapiens<br>GN=TIGAR<br>PE=1 SV=1 - [TIGAR_HUMAN]                                                 | 40.00 | 1 | 7  | 8  | 20  | 1.090 | 1.179 | 0.848 | 0.965 | 55.73  | 40.00 | 12 | 20  | 270 | 30.0 | 7.69 |
| Q8IWA4 | Mitofusin-1<br>OS=Homo sapiens<br>GN=MFN1<br>PE=1 SV=2 - [MFN1_HUMAN]                                                                            | 10.80 | 1 | 5  | 5  | 7   | 1.222 | 0.809 | 0.746 | 0.965 | 15.36  | 10.80 | 6  | 7   | 741 | 84.0 | 6.25 |
| P08865 | 40S ribosomal protein SA<br>OS=Homo sapiens<br>GN=RPSA<br>PE=1 SV=4 - [RPSA_HUMAN]                                                               | 51.19 | 2 | 14 | 14 | 133 | 0.819 | 0.963 | 0.938 | 0.965 | 380.70 | 51.19 | 22 | 133 | 295 | 32.8 | 4.87 |
| Q9NZV5 | Selenoprotein N<br>OS=Homo sapiens<br>GN=SEPN1<br>PE=1 SV=5 - [SELN_HUMAN]                                                                       | 7.63  | 1 | 5  | 5  | 9   | 0.993 | 0.714 | 0.904 | 0.965 | 11.96  | 7.63  | 6  | 9   | 590 | 65.8 | 5.48 |
| O75461 | Transcription factor E2F6<br>OS=Homo sapiens<br>GN=E2F6<br>PE=1 SV=1 - [E2F6_HUMAN]                                                              | 3.91  | 1 | 1  | 1  | 1   | 0.657 | 0.771 | 1.240 | 0.965 | 0.00   | 3.91  | 1  | 1   | 281 | 31.8 | 5.50 |
| O95999 | B-cell lymphoma/leukemia 10<br>OS=Homo sapiens<br>GN=BCL10<br>PE=1 SV=1 - [BCL10_HUMAN]                                                          | 14.59 | 1 | 3  | 4  | 11  | 1.097 | 0.962 | 0.981 | 0.965 | 19.22  | 14.59 | 6  | 11  | 233 | 26.2 | 5.74 |

|        |                                                                                                                            |       |   |    |    |    |       |       |       |       |        |       |    |    |      |       |      |
|--------|----------------------------------------------------------------------------------------------------------------------------|-------|---|----|----|----|-------|-------|-------|-------|--------|-------|----|----|------|-------|------|
| Q8N0V3 | Putative ribosome-binding factor A, mitochondrial<br>OS=Homo sapiens<br>GN=RBFA<br>PE=1 SV=3 - [RBFA_HUMAN]                | 5.83  | 1 | 1  | 1  | 2  | 0.658 | 0.498 | 0.405 | 0.965 | 7.68   | 5.83  | 2  | 2  | 343  | 38.3  | 7.85 |
| O75821 | Eukaryotic translation initiation factor 3 subunit G<br>OS=Homo sapiens<br>GN=EIF3G<br>PE=1 SV=2 - [EIF3G_HUMAN]           | 42.50 | 1 | 15 | 15 | 53 | 0.889 | 0.784 | 0.701 | 0.965 | 129.94 | 42.50 | 21 | 53 | 320  | 35.6  | 6.13 |
| Q8TEX9 | Importin-4<br>OS=Homo sapiens<br>GN=IPO4<br>PE=1 SV=2 - [IPO4_HUMAN]                                                       | 7.31  | 1 | 7  | 7  | 25 | 0.806 | 0.801 | 0.946 | 0.965 | 42.54  | 7.31  | 10 | 25 | 1081 | 118.6 | 4.96 |
| Q04695 | Keratin, type I cytoskeletal 17<br>OS=Homo sapiens<br>GN=KRT17<br>PE=1 SV=2 - [K1C17_HUMAN]                                | 16.67 | 6 | 1  | 10 | 26 | 0.771 | 0.095 | 1.527 | 0.965 | 47.23  | 16.67 | 13 | 26 | 432  | 48.1  | 5.02 |
| P60520 | Gamma-aminobutyric acid receptor-associated protein-like 2<br>OS=Homo sapiens<br>GN=GABARAPL2<br>PE=1 SV=1 - [GBRL2_HUMAN] | 39.32 | 1 | 4  | 5  | 9  | 0.833 | 0.637 | 0.694 | 0.966 | 17.41  | 39.32 | 6  | 9  | 117  | 13.7  | 8.10 |
| P10768 | S-formylglutathione hydrolase<br>OS=Homo sapiens<br>GN=ESD PE=1 SV=2 - [ESTD_HUMAN]                                        | 37.94 | 1 | 9  | 9  | 58 | 1.103 | 0.704 | 0.843 | 0.966 | 152.59 | 37.94 | 16 | 58 | 282  | 31.4  | 7.02 |
| Q9P219 | Protein Daple<br>OS=Homo sapiens<br>GN=CCDC88C<br>PE=1 SV=3 - [DAPLE_HUMAN]                                                | 1.58  | 3 | 1  | 5  | 19 | 0.712 | 0.762 | 0.708 | 0.966 | 41.78  | 1.58  | 6  | 19 | 2028 | 228.1 | 6.23 |
| Q14692 | Ribosome biogenesis protein BMS1 homolog<br>OS=Homo sapiens<br>GN=BMS1<br>PE=1 SV=1 - [BMS1_HUMAN]                         | 2.18  | 1 | 3  | 4  | 6  | 0.912 | 1.248 | 0.844 | 0.966 | 10.06  | 2.18  | 6  | 6  | 1282 | 145.7 | 6.44 |



|        |                                                                                                           |       |   |    |    |     |       |       |       |       |         |       |    |     |      |       |       |
|--------|-----------------------------------------------------------------------------------------------------------|-------|---|----|----|-----|-------|-------|-------|-------|---------|-------|----|-----|------|-------|-------|
| O14818 | Proteasome subunit alpha type-7<br>OS=Homo sapiens<br>GN=PSMA7<br>PE=1 SV=1 - [PSA7_HUMAN]                | 47.58 | 1 | 8  | 12 | 58  | 1.042 | 1.096 | 1.049 | 0.966 | 147.74  | 47.58 | 19 | 58  | 248  | 27.9  | 8.46  |
| Q9H7Z7 | Prostaglandin E synthase 2<br>OS=Homo sapiens<br>GN=PTGES2<br>PE=1 SV=1 - [PGES2_HUMAN]                   | 29.18 | 1 | 10 | 10 | 31  | 1.120 | 1.163 | 1.096 | 0.966 | 75.90   | 29.18 | 14 | 31  | 377  | 41.9  | 9.16  |
| O15457 | MutS protein homolog 4<br>OS=Homo sapiens<br>GN=MSH4<br>PE=1 SV=2 - [MSH4_HUMAN]                          | 1.50  | 1 | 1  | 2  | 3   | 0.915 | 0.866 | 0.957 | 0.966 | 3.60    | 1.50  | 2  | 3   | 936  | 104.7 | 7.37  |
| P20594 | Atrial natriuretic peptide receptor 2<br>OS=Homo sapiens<br>GN=NPR2<br>PE=1 SV=1 -                        | 3.53  | 1 | 3  | 3  | 4   | 1.289 | 0.551 | 0.812 | 0.966 | 7.60    | 3.53  | 4  | 4   | 1047 | 116.9 | 6.87  |
| Q5SQI0 | Alpha-tubulin N-acetyltransferase 1<br>OS=Homo sapiens<br>GN=ATAT1<br>PE=1 SV=1 - [ATAT_HUMAN]            | 6.18  | 1 | 2  | 2  | 3   | 1.273 | 1.114 | 1.290 | 0.966 | 2.78    | 6.18  | 3  | 3   | 421  | 46.8  | 9.95  |
| Q86SX6 | Glutaredoxin-related protein 5, mitochondrial<br>OS=Homo sapiens<br>GN=GLRX5<br>PE=1 SV=2 - [GLRX5_HUMAN] | 21.02 | 1 | 4  | 4  | 10  | 0.806 | 1.162 | 0.686 | 0.966 | 19.44   | 21.02 | 6  | 10  | 157  | 16.6  | 6.79  |
| P36578 | 60S ribosomal protein L4<br>OS=Homo sapiens<br>GN=RPL4 PE=1 SV=5 - [RL4_HUMAN]                            | 46.84 | 1 | 29 | 30 | 244 | 0.816 | 1.046 | 0.977 | 0.966 | 487.35  | 46.84 | 47 | 244 | 427  | 47.7  | 11.06 |
| P23284 | Peptidyl-prolyl cis-trans isomerase B<br>OS=Homo sapiens<br>GN=PPIB PE=1 SV=2 - [PPIB_HUMAN]              | 68.98 | 1 | 21 | 22 | 671 | 0.801 | 0.933 | 0.858 | 0.966 | 1512.01 | 68.98 | 37 | 671 | 216  | 23.7  | 9.41  |
| Q9BV44 | THUMP domain-containing protein 3<br>OS=Homo sapiens<br>GN=THUMPD3<br>PE=1 SV=1 - [THUM3_HUMAN]           | 9.66  | 1 | 5  | 5  | 8   | 0.832 | 0.954 | 1.139 | 0.966 | 16.45   | 9.66  | 6  | 8   | 507  | 57.0  | 6.37  |

|        |                                                                                                                                    |       |   |    |    |    |       |       |       |       |        |       |    |    |      |       |      |
|--------|------------------------------------------------------------------------------------------------------------------------------------|-------|---|----|----|----|-------|-------|-------|-------|--------|-------|----|----|------|-------|------|
| Q96H79 | Zinc finger<br>CCH+type<br>antiviral<br>protein 1-like<br>OS=Homo<br>sapiens<br>GN=ZC3HAV1L<br>PE=1 SV=2 -<br>[ZCCHL_HUMAN<br>]    | 18.33 | 1 | 4  | 4  | 5  | 1.765 | 0.785 | 0.704 | 0.966 | 12.37  | 18.33 | 5  | 5  | 300  | 32.9  | 8.13 |
| P30050 | 60S ribosomal<br>protein L12<br>OS=Homo<br>sapiens<br>GN=RPL12<br>PE=1 SV=1 -<br>[RL12_HUMAN]                                      | 67.27 | 1 | 10 | 10 | 98 | 0.802 | 0.816 | 0.830 | 0.966 | 275.04 | 67.27 | 16 | 98 | 165  | 17.8  | 9.42 |
| Q14155 | Rho guanine<br>nucleotide<br>exchange<br>factor 7<br>OS=Homo<br>sapiens<br>GN=ARHGEF7<br>PE=1 SV=2 -<br>[ARHG7_HUMAN]              | 17.31 | 1 | 12 | 13 | 44 | 1.252 | 1.191 | 1.062 | 0.966 | 108.61 | 17.31 | 19 | 44 | 803  | 90.0  | 7.09 |
| P98194 | Calcium-<br>transporting<br>ATPase type<br>2C member 1<br>OS=Homo<br>sapiens<br>GN=ATP2C1<br>PE=1 SV=3 -<br>[AT2C1_HUMAN<br>]      | 11.86 | 1 | 8  | 8  | 23 | 1.276 | 0.759 | 0.871 | 0.967 | 52.28  | 11.86 | 14 | 23 | 919  | 100.5 | 6.74 |
| Q7Z410 | Transmembran<br>e protease<br>serine 9<br>OS=Homo<br>sapiens<br>GN=TMPRSS9<br>PE=1 SV=2 -<br>[TMPS9_HUMA<br>]                      | 1.04  | 1 | 1  | 1  | 1  | 1.286 | 0.632 | 0.454 | 0.967 | 2.18   | 1.04  | 1  | 1  | 1059 | 113.9 | 8.07 |
| Q09019 | Dystrophia<br>myotonica WD<br>repeat-<br>containing<br>protein<br>OS=Homo<br>sapiens<br>GN=DMWD<br>PE=1 SV=3 -<br>[DMWD_HUMAN<br>] | 8.31  | 1 | 3  | 3  | 9  | 1.571 | 0.675 | 1.147 | 0.967 | 20.64  | 8.31  | 4  | 9  | 674  | 70.4  | 7.24 |
| Q9H0X4 | Protein ITFG3<br>OS=Homo<br>sapiens<br>GN=ITFG3<br>PE=1 SV=1 -<br>[ITFG3_HUMAN<br>]                                                | 5.98  | 1 | 4  | 4  | 19 | 1.252 | 0.731 | 0.799 | 0.967 | 34.77  | 5.98  | 7  | 19 | 552  | 59.6  | 6.28 |
| O95376 | E3 ubiquitin-<br>protein ligase<br>ARIH2<br>OS=Homo<br>sapiens<br>GN=ARIH2<br>PE=1 SV=1 -<br>[ARI2_HUMAN]                          | 7.91  | 1 | 3  | 3  | 6  | 1.115 | 1.159 | 1.115 | 0.967 | 19.85  | 7.91  | 5  | 6  | 493  | 57.8  | 5.63 |

|        |                                                                                                                              |       |   |    |    |    |       |       |       |       |        |       |    |    |      |       |       |
|--------|------------------------------------------------------------------------------------------------------------------------------|-------|---|----|----|----|-------|-------|-------|-------|--------|-------|----|----|------|-------|-------|
| Q9H2U2 | Inorganic pyrophosphatase 2, mitochondrial<br>OS=Homo sapiens<br>GN=PPA2<br>PE=1 SV=2 - [IPYR2_HUMAN]                        | 52.40 | 1 | 16 | 18 | 68 | 1.111 | 1.432 | 1.073 | 0.967 | 165.79 | 52.40 | 29 | 68 | 334  | 37.9  | 7.39  |
| Q9GZV5 | WW domain-containing transcription regulator protein 1<br>OS=Homo sapiens<br>GN=WWTR1<br>PE=1 SV=1 - [WWTR1_HUMAN]           | 3.75  | 1 | 2  | 2  | 4  | 0.977 | 0.944 | 1.230 | 0.967 | 8.50   | 3.75  | 3  | 4  | 400  | 44.1  | 5.82  |
| Q5JU85 | IQ motif and SEC7 domain-containing protein 2<br>OS=Homo sapiens<br>GN=IQSEC2<br>PE=1 SV=1 - [IQEC2_HUMAN]                   | 2.71  | 1 | 2  | 4  | 4  | 1.253 | 0.635 | 0.881 | 0.967 | 5.00   | 2.71  | 4  | 4  | 1478 | 161.6 | 8.56  |
| P12931 | Proto-oncogene tyrosine-protein kinase Src<br>OS=Homo sapiens<br>GN=SRC PE=1 SV=3 - [SRC_HUMAN]                              | 20.15 | 3 | 4  | 10 | 37 | 0.778 | 0.911 | 0.801 | 0.967 | 85.54  | 20.15 | 16 | 37 | 536  | 59.8  | 7.42  |
| P18827 | Syndecan-1<br>OS=Homo sapiens<br>GN=SDC1<br>PE=1 SV=3 - [SDC1_HUMAN]                                                         | 3.87  | 1 | 1  | 1  | 2  | 1.629 | 0.683 | 0.523 | 0.967 | 2.77   | 3.87  | 2  | 2  | 310  | 32.4  | 4.63  |
| Q8WUH2 | Transforming growth factor-beta receptor-associated protein 1<br>OS=Homo sapiens<br>GN=TGFBRAP1<br>PE=1 SV=1 - [TGFA1_HUMAN] | 0.81  | 1 | 1  | 1  | 1  | 1.529 | 0.893 | 0.937 | 0.967 | 2.18   | 0.81  | 1  | 1  | 860  | 97.1  | 6.55  |
| Q6P1Q0 | LETM1 domain-containing protein 1<br>OS=Homo sapiens<br>GN=LETMD1<br>PE=1 SV=1 - [LTMD1_HUMAN]                               | 3.06  | 1 | 1  | 1  | 2  | 0.881 | 1.266 | 0.869 | 0.967 | 2.31   | 3.06  | 2  | 2  | 360  | 41.8  | 10.32 |
| Q9H9A5 | CCR4-NOT transcription complex subunit 10<br>OS=Homo sapiens<br>GN=CNOT10<br>PE=1 SV=1 - [CNO10_HUMAN]                       | 4.30  | 2 | 3  | 3  | 3  | 1.216 | 0.904 | 0.863 | 0.967 | 4.81   | 4.30  | 3  | 3  | 744  | 82.3  | 7.78  |

|        |                                                                                                                            |       |   |    |    |     |       |       |       |       |        |       |    |     |      |       |      |
|--------|----------------------------------------------------------------------------------------------------------------------------|-------|---|----|----|-----|-------|-------|-------|-------|--------|-------|----|-----|------|-------|------|
| Q96FH0 | Protein<br>MEF2BNB<br>OS=Homo<br>sapiens<br>GN=MEF2BNB<br>PE=1 SV=1 -<br>[MF2NB_HUMAN]                                     | 15.97 | 1 | 2  | 2  | 5   | 0.988 | 1.003 | 1.175 | 0.967 | 13.58  | 15.97 | 3  | 5   | 119  | 13.4  | 5.80 |
| Q08426 | Peroxisomal<br>bifunctional<br>enzyme<br>OS=Homo<br>sapiens<br>GN=EHHADH<br>PE=1 SV=3 -<br>[EHP_HUMAN]                     | 5.95  | 1 | 4  | 4  | 11  | 0.995 | 1.827 | 1.286 | 0.967 | 17.87  | 5.95  | 6  | 11  | 723  | 79.4  | 9.14 |
| Q96JP5 | E3 ubiquitin-<br>protein ligase<br>ZFP91<br>OS=Homo<br>sapiens<br>GN=ZFP91<br>PE=1 SV=1 -<br>[ZFP91_HUMAN]                 | 5.96  | 1 | 2  | 2  | 5   | 0.910 | 0.923 | 0.671 | 0.968 | 5.24   | 5.96  | 4  | 5   | 570  | 63.4  | 7.36 |
| Q8TC41 | Probable E3<br>ubiquitin-<br>protein ligase<br>RNF217<br>OS=Homo<br>sapiens<br>GN=RNF217<br>PE=2 SV=4 -<br>[RN217_HUMAN]   | 4.98  | 1 | 2  | 2  | 3   | 1.309 | 1.304 | 1.133 | 0.968 | 4.09   | 4.98  | 2  | 3   | 542  | 59.3  | 7.52 |
| Q9H6X4 | Transmembran<br>e protein 134<br>OS=Homo<br>sapiens<br>GN=TMEM134<br>PE=2 SV=1 -<br>[TM134_HUMAN]                          | 4.10  | 1 | 1  | 1  | 2   | 0.965 | 0.757 | 0.901 | 0.968 | 6.73   | 4.10  | 2  | 2   | 195  | 21.6  | 6.54 |
| O95248 | Myotubularin-<br>related protein<br>5 OS=Homo<br>sapiens<br>GN=SBF1<br>PE=1 SV=3 -<br>[MTMR5_HUMAN]                        | 9.96  | 1 | 17 | 17 | 55  | 1.171 | 0.996 | 0.926 | 0.968 | 111.03 | 9.96  | 29 | 55  | 1867 | 208.2 | 6.90 |
| Q9NUG4 | Cerebral<br>cavernous<br>malformations<br>2 protein-like<br>OS=Homo<br>sapiens<br>GN=CCM2L<br>PE=2 SV=3 -<br>[CCM2L_HUMAN] | 2.98  | 1 | 1  | 1  | 1   | 0.556 | 0.904 | 1.175 | 0.968 | 2.51   | 2.98  | 1  | 1   | 571  | 62.1  | 5.95 |
| P14543 | Nidogen-1<br>OS=Homo<br>sapiens<br>GN=NID1 PE=1<br>SV=3 -<br>[NID1_HUMAN]                                                  | 4.33  | 1 | 4  | 5  | 7   | 0.895 | 1.060 | 0.841 | 0.968 | 14.33  | 4.33  | 7  | 7   | 1247 | 136.3 | 5.29 |
| Q96TA1 | Niban-like<br>protein 1<br>OS=Homo<br>sapiens<br>GN=FAM129B<br>PE=1 SV=3 -<br>[NIBL1_HUMAN]                                | 44.10 | 1 | 29 | 30 | 209 | 1.280 | 0.971 | 1.215 | 0.968 | 497.29 | 44.10 | 47 | 209 | 746  | 84.1  | 6.19 |

|        |                                                                                                                                                                                                         |       |   |    |    |    |       |       |       |       |        |       |    |    |      |       |      |
|--------|---------------------------------------------------------------------------------------------------------------------------------------------------------------------------------------------------------|-------|---|----|----|----|-------|-------|-------|-------|--------|-------|----|----|------|-------|------|
| Q9Y3E7 | Charged multivesicular body protein 3<br>OS=Homo sapiens<br>GN=CHMP3<br>PE=1 SV=3 - [CHMP3_HUMAN]<br>Rab11 family-interacting protein 1<br>OS=Homo sapiens<br>GN=RAB11FIP1<br>PE=1 SV=3 - [RFIP1_HUMAN] | 6.31  | 1 | 2  | 2  | 9  | 0.884 | 1.027 | 1.004 | 0.968 | 15.93  | 6.31  | 3  | 9  | 222  | 25.1  | 5.12 |
| Q6WKZ4 | CCA tRNA nucleotidyltransferase 1, mitochondrial<br>OS=Homo sapiens<br>GN=TRNT1<br>PE=1 SV=2 - [TRNT1_HUMAN]                                                                                            | 13.25 | 2 | 10 | 10 | 28 | 1.039 | 1.158 | 0.833 | 0.968 | 54.99  | 13.25 | 16 | 28 | 1283 | 137.1 | 5.43 |
| Q96Q11 | NAD(P)H-hydrate epimerase<br>OS=Homo sapiens<br>GN=TRNT1<br>PE=1 SV=2 - [TRNT1_HUMAN]                                                                                                                   | 33.87 | 1 | 14 | 14 | 32 | 0.929 | 1.128 | 0.916 | 0.968 | 60.44  | 33.87 | 21 | 32 | 434  | 50.1  | 8.10 |
| Q8NCW5 | F-box/LRR-repeat protein 18<br>OS=Homo sapiens<br>GN=APOA1BP<br>PE=1 SV=2 - [NNRE_HUMAN]                                                                                                                | 22.92 | 1 | 5  | 5  | 26 | 1.162 | 1.035 | 1.153 | 0.968 | 43.41  | 22.92 | 7  | 26 | 288  | 31.7  | 7.66 |
| Q96ME1 | Twinfilin-1<br>OS=Homo sapiens<br>GN=FBXL18<br>PE=1 SV=2 - [FXL18_HUMAN]                                                                                                                                | 5.22  | 1 | 4  | 4  | 12 | 0.788 | 0.745 | 1.078 | 0.968 | 24.29  | 5.22  | 6  | 12 | 805  | 88.3  | 8.32 |
| Q12792 | Rab11 family-interacting protein 5<br>OS=Homo sapiens<br>GN=TWF1<br>PE=1 SV=3 - [TWF1_HUMAN]                                                                                                            | 32.86 | 1 | 10 | 11 | 58 | 1.075 | 1.114 | 1.014 | 0.968 | 136.39 | 32.86 | 19 | 58 | 350  | 40.3  | 6.96 |
| Q9BXF6 | Histidine triad nucleotide-binding protein 1<br>OS=Homo sapiens<br>GN=RAB11FIP5<br>PE=1 SV=1 - [RFIP5_HUMAN]                                                                                            | 23.28 | 1 | 10 | 10 | 39 | 0.928 | 0.982 | 1.290 | 0.968 | 102.99 | 23.28 | 16 | 39 | 653  | 70.4  | 9.23 |
| P49773 | Ubiquitin-conjugating enzyme E2 R2<br>OS=Homo sapiens<br>GN=HINT1<br>PE=1 SV=2 - [HINT1_HUMAN]                                                                                                          | 68.25 | 1 | 6  | 6  | 77 | 1.179 | 0.794 | 1.158 | 0.968 | 189.01 | 68.25 | 11 | 77 | 126  | 13.8  | 6.95 |
| Q712K3 | Ubiquitin-conjugating enzyme E2 R2<br>OS=Homo sapiens<br>GN=UBE2R2<br>PE=1 SV=1 - [UB2R2_HUMAN]                                                                                                         | 29.41 | 1 | 6  | 7  | 28 | 0.961 | 1.047 | 0.935 | 0.969 | 63.32  | 29.41 | 10 | 28 | 238  | 27.1  | 4.42 |

|        |                                                                                                                                                                                                                  |       |   |    |    |     |       |       |       |       |        |       |    |     |      |       |       |
|--------|------------------------------------------------------------------------------------------------------------------------------------------------------------------------------------------------------------------|-------|---|----|----|-----|-------|-------|-------|-------|--------|-------|----|-----|------|-------|-------|
| P25208 | Nuclear transcription factor Y subunit beta<br>OS=Homo sapiens<br>GN=NFYB<br>PE=1 SV=2 - [NFYB_HUMAN]<br>Dehydrogenase/reductase SDR family member 4<br>OS=Homo sapiens<br>GN=DHRS4<br>PE=1 SV=3 - [DHRS4_HUMAN] | 6.28  | 1 | 1  | 1  | 7   | 0.673 | 1.358 | 0.700 | 0.969 | 18.88  | 6.28  | 2  | 7   | 207  | 22.8  | 4.59  |
| Q9BTZ2 | Prolyl 3-hydroxylase 3<br>OS=Homo sapiens<br>GN=LEPREL2<br>PE=1 SV=1 - [P3HB_HUMAN]                                                                                                                              | 16.19 | 3 | 6  | 6  | 17  | 1.060 | 0.947 | 1.082 | 0.969 | 44.64  | 16.19 | 10 | 17  | 278  | 29.5  | 8.56  |
| Q8IVL6 | OTU domain-containing protein 6B<br>OS=Homo sapiens<br>GN=OTUD6B<br>PE=1 SV=1 - [OTU6B_HUMAN]                                                                                                                    | 16.98 | 1 | 10 | 10 | 33  | 0.738 | 1.109 | 1.093 | 0.969 | 92.46  | 16.98 | 16 | 33  | 736  | 81.8  | 6.32  |
| Q8N6M0 | Acyl-CoA synthetase family member 3, mitochondrial<br>OS=Homo sapiens<br>GN=ACSF3<br>PE=1 SV=3 - [ACSF3_HUMAN]                                                                                                   | 8.87  | 2 | 1  | 3  | 5   | 0.882 | 1.418 | 1.308 | 0.969 | 11.36  | 8.87  | 4  | 5   | 293  | 33.8  | 6.05  |
| Q4G176 | Guanine nucleotide-binding protein G(z) subunit alpha<br>OS=Homo sapiens<br>GN=GNAZ<br>PE=2 SV=3 - [GNAZ_HUMAN]                                                                                                  | 8.33  | 1 | 5  | 5  | 15  | 0.855 | 0.890 | 0.889 | 0.969 | 40.40  | 8.33  | 9  | 15  | 576  | 64.1  | 8.37  |
| P19086 | Heat shock 70 kDa protein 4<br>OS=Homo sapiens<br>GN=HSPA4<br>PE=1 SV=4 - [HSP74_HUMAN]                                                                                                                          | 4.23  | 1 | 1  | 2  | 6   | 1.014 | 0.479 | 0.565 | 0.969 | 9.47   | 4.23  | 3  | 6   | 355  | 40.9  | 7.61  |
| P34932 | 60S ribosomal protein L18a<br>OS=Homo sapiens<br>GN=RPL18A<br>PE=1 SV=2 - [RPL18A_HUMAN]                                                                                                                         | 59.17 | 1 | 42 | 46 | 280 | 0.913 | 0.986 | 1.000 | 0.969 | 752.33 | 59.17 | 74 | 280 | 840  | 94.3  | 5.19  |
| Q02543 | Ankyrin-3<br>OS=Homo sapiens<br>GN=ANK3<br>PE=1 SV=3 - [ANK3_HUMAN]                                                                                                                                              | 31.82 | 1 | 6  | 6  | 51  | 0.811 | 0.892 | 0.856 | 0.969 | 147.10 | 31.82 | 12 | 51  | 176  | 20.7  | 10.71 |
| Q12955 |                                                                                                                                                                                                                  | 0.94  | 1 | 3  | 4  | 6   | 1.202 | 1.068 | 1.190 | 0.969 | 12.44  | 0.94  | 5  | 6   | 4377 | 480.1 | 6.49  |

|        |                                                                                                           |       |   |    |    |    |       |       |       |       |        |       |    |    |      |       |      |
|--------|-----------------------------------------------------------------------------------------------------------|-------|---|----|----|----|-------|-------|-------|-------|--------|-------|----|----|------|-------|------|
| O14966 | Ras-related protein Rab-7L1 OS=Homo sapiens<br>GN=RAB29<br>PE=1 SV=1 - [RAB7L_HUMAN]                      | 12.32 | 1 | 2  | 2  | 2  | 1.101 | 0.846 | 0.902 | 0.969 | 5.90   | 12.32 | 2  | 2  | 203  | 23.1  | 7.18 |
| Q9NSY1 | BMP-2-inducible protein kinase OS=Homo sapiens<br>GN=BMP2K<br>PE=1 SV=2 - [BMP2K_HUMAN]                   | 6.98  | 1 | 7  | 8  | 26 | 0.849 | 1.295 | 1.142 | 0.969 | 49.19  | 6.98  | 15 | 26 | 1161 | 129.1 | 6.51 |
| O15126 | Secretory carrier-associated membrane protein 1 OS=Homo sapiens<br>GN=SCAMP1<br>PE=1 SV=2 - [SCAM1_HUMAN] | 31.07 | 1 | 7  | 7  | 21 | 0.875 | 0.981 | 0.776 | 0.969 | 51.43  | 31.07 | 10 | 21 | 338  | 37.9  | 7.42 |
| Q8NH09 | Atlastin-2 OS=Homo sapiens<br>GN=ATL2 PE=1 SV=2 - [ATLA2_HUMAN]                                           | 12.52 | 1 | 4  | 6  | 15 | 1.107 | 1.270 | 0.780 | 0.969 | 27.42  | 12.52 | 10 | 15 | 583  | 66.2  | 5.48 |
| P61221 | ATP-binding cassette sub-family E member 1 OS=Homo sapiens<br>GN=ABCE1<br>PE=1 SV=1 - [ABCE1_HUMAN]       | 36.73 | 1 | 20 | 20 | 99 | 0.681 | 0.930 | 0.817 | 0.969 | 222.53 | 36.73 | 32 | 99 | 599  | 67.3  | 8.34 |
| Q6YHK3 | CD109 antigen OS=Homo sapiens<br>GN=CD109<br>PE=1 SV=2 - [CD109_HUMAN]                                    | 3.67  | 1 | 5  | 5  | 8  | 0.993 | 1.218 | 1.168 | 0.969 | 16.43  | 3.67  | 5  | 8  | 1445 | 161.6 | 5.85 |
| O43174 | Cytochrome P450 26A1 OS=Homo sapiens<br>GN=CYP26A1<br>PE=1 SV=2 - [CP26A_HUMAN]                           | 2.82  | 1 | 1  | 1  | 2  | 0.812 | 1.054 | 0.774 | 0.969 | 0.00   | 2.82  | 1  | 2  | 497  | 56.2  | 8.69 |
| Q5VYM1 | Uncharacterized protein C9orf131 OS=Homo sapiens<br>GN=C9orf131<br>PE=2 SV=3 - [C1131_HUMAN]              | 1.58  | 1 | 1  | 1  | 1  | 0.954 | 0.854 | 0.975 | 0.969 | 1.87   | 1.58  | 1  | 1  | 1079 | 117.6 | 7.36 |
| Q9C040 | Tripartite motif-containing protein 2 OS=Homo sapiens<br>GN=TRIM2<br>PE=1 SV=1 - [TRIM2_HUMAN]            | 3.09  | 1 | 3  | 3  | 15 | 0.468 | 1.553 | 0.996 | 0.969 | 30.19  | 3.09  | 6  | 15 | 744  | 81.5  | 6.96 |

|        |                                                                                                                                                 |       |   |    |    |     |       |       |       |       |        |       |    |     |      |       |      |
|--------|-------------------------------------------------------------------------------------------------------------------------------------------------|-------|---|----|----|-----|-------|-------|-------|-------|--------|-------|----|-----|------|-------|------|
| Q9H2S1 | Small conductance calcium-activated potassium channel protein 2<br>OS=Homo sapiens<br>GN=KCNN2<br>PE=1 SV=2 - Synergin gamma<br>OS=Homo sapiens | 4.84  | 1 | 2  | 2  | 3   | 1.718 | 0.623 | 1.020 | 0.969 | 5.84   | 4.84  | 2  | 3   | 579  | 63.7  | 9.52 |
| Q9UMZ2 | Glutamyl-peptide cyclotransferase-like protein<br>OS=Homo sapiens<br>GN=SYNRG<br>PE=1 SV=2 - [SYNRG_HUMAN]                                      | 3.73  | 1 | 4  | 5  | 14  | 1.076 | 0.986 | 1.274 | 0.969 | 25.25  | 3.73  | 6  | 14  | 1314 | 140.6 | 5.03 |
| Q9NXS2 | 2-oxoglutarate and iron-dependent oxygenase domain-containing protein 3<br>OS=Homo sapiens<br>GN=QPCTL<br>PE=1 SV=2 - [QPCTL_HUMAN]             | 10.21 | 1 | 5  | 5  | 13  | 0.778 | 0.718 | 0.767 | 0.969 | 20.69  | 10.21 | 9  | 13  | 382  | 42.9  | 9.82 |
| Q96IJ6 | Mannose-1-phosphate guanytransferase alpha<br>OS=Homo sapiens<br>GN=GMPPA<br>PE=1 SV=1 - [GMPPA_HUMAN]                                          | 22.86 | 1 | 8  | 8  | 25  | 1.157 | 1.137 | 0.998 | 0.970 | 66.97  | 22.86 | 13 | 25  | 420  | 46.3  | 7.21 |
| Q6PK18 | 2-oxoglutarate and iron-dependent oxygenase domain-containing protein 3<br>OS=Homo sapiens<br>GN=OGFOD3<br>PE=1 SV=2 - [OGFOD3_HUMAN]           | 4.39  | 1 | 1  | 1  | 8   | 0.935 | 0.938 | 0.931 | 0.970 | 19.15  | 4.39  | 2  | 8   | 319  | 35.6  | 8.18 |
| P38935 | DNA-binding protein SMUBP-2<br>OS=Homo sapiens<br>GN=IGHMBP2<br>PE=1 SV=3 - [SMBP2_HUMAN]                                                       | 3.63  | 1 | 2  | 4  | 4   | 0.837 | 1.130 | 1.040 | 0.970 | 7.16   | 3.63  | 4  | 4   | 993  | 109.1 | 8.97 |
| P80303 | Nudeobindin-2<br>OS=Homo sapiens<br>GN=NUCB2<br>PE=1 SV=2 - [NUCB2_HUMAN]                                                                       | 51.67 | 1 | 18 | 19 | 113 | 0.933 | 0.976 | 0.852 | 0.970 | 248.12 | 51.67 | 28 | 113 | 420  | 50.2  | 5.12 |
| P01008 | Antithrombin-III<br>OS=Homo sapiens<br>GN=SERPINC1<br>PE=1 SV=1 - [ANT3_HUMAN]                                                                  | 2.80  | 1 | 1  | 1  | 1   | 1.066 | 0.975 | 0.851 | 0.970 | 0.00   | 2.80  | 1  | 1   | 464  | 52.6  | 6.71 |



|        |                                                                                                                                |       |   |    |    |     |       |       |       |       |        |       |    |     |      |      |      |
|--------|--------------------------------------------------------------------------------------------------------------------------------|-------|---|----|----|-----|-------|-------|-------|-------|--------|-------|----|-----|------|------|------|
| Q9UPQ3 | Arf-GAP with GTPase, ANK repeat and PH domain-containing protein 1<br>OS=Homo sapiens<br>GN=AGAP1<br>PE=1 SV=4 - [AGAP1_HUMAN] | 3.85  | 2 | 1  | 3  | 3   | 0.219 | 0.709 | 0.970 | 2.65  | 3.85   | 3     | 3  | 857 | 94.4 | 7.94 |      |
| P09543 | 2',3'-cyclic-nucleotide 3'-phosphodiesterase<br>OS=Homo sapiens<br>GN=CNP PE=1 SV=2 - [CNP7_HUMAN]                             | 48.46 | 2 | 23 | 24 | 114 | 1.481 | 1.229 | 1.029 | 0.970 | 303.27 | 48.46 | 39 | 114 | 421  | 47.5 | 9.07 |
| Q6UW02 | Cytochrome P450 20A1<br>OS=Homo sapiens<br>GN=CYP20A1<br>PE=2 SV=1 - [CP20A_HUMAN]                                             | 4.76  | 1 | 2  | 2  | 4   | 1.252 | 0.700 | 0.594 | 0.970 | 7.62   | 4.76  | 4  | 4   | 462  | 52.4 | 6.21 |
| Q13564 | NEDD8-activating enzyme E1 regulatory subunit<br>OS=Homo sapiens<br>GN=NAE1<br>PE=1 SV=1 - [ULA1_HUMAN]                        | 15.17 | 1 | 9  | 9  | 31  | 0.951 | 1.029 | 0.924 | 0.970 | 67.57  | 15.17 | 13 | 31  | 534  | 60.2 | 5.40 |
| P17980 | 26S protease regulatory subunit 6A<br>OS=Homo sapiens<br>GN=PSMC3<br>PE=1 SV=3 - [PRSG6_HUMAN]                                 | 57.63 | 1 | 22 | 22 | 168 | 0.952 | 1.068 | 1.032 | 0.970 | 433.70 | 57.63 | 35 | 168 | 439  | 49.2 | 5.24 |
| P62820 | Ras-related protein Rab-1A<br>OS=Homo sapiens<br>GN=RAB1A<br>PE=1 SV=3 - [RAB1A_HUMAN]                                         | 80.98 | 2 | 7  | 17 | 128 | 1.088 | 0.879 | 0.938 | 0.970 | 307.38 | 80.98 | 28 | 128 | 205  | 22.7 | 6.21 |
| P04843 | Dolichyl-diphosphooligoglycosyltransferase subunit 1<br>OS=Homo sapiens<br>GN=RPNI<br>PE=1 SV=1 - [RPNI_HUMAN]                 | 45.80 | 1 | 29 | 29 | 412 | 0.814 | 0.871 | 0.808 | 0.971 | 993.78 | 45.80 | 50 | 412 | 607  | 68.5 | 6.38 |
| Q969V6 | MKL/myocardin-like protein 1<br>OS=Homo sapiens<br>GN=MKL1<br>PE=1 SV=1 - [MKL1_HUMAN]                                         | 4.73  | 2 | 2  | 4  | 15  | 1.165 | 1.377 | 1.585 | 0.971 | 39.15  | 4.73  | 6  | 15  | 931  | 98.9 | 5.86 |

|        |                                                                                                                       |       |   |    |    |      |       |       |       |       |         |       |     |      |      |       |      |
|--------|-----------------------------------------------------------------------------------------------------------------------|-------|---|----|----|------|-------|-------|-------|-------|---------|-------|-----|------|------|-------|------|
| Q8NB9J | SID1<br>transmembrane family member 2<br>OS=Homo sapiens<br>GN=SIDT2<br>PE=1 SV=2 - [SIDT2_HUMAN]                     | 6.61  | 1 | 4  | 4  | 7    | 0.816 | 0.851 | 0.975 | 0.971 | 19.43   | 6.61  | 5   | 7    | 832  | 94.4  | 6.96 |
| Q9UBN7 | Histone deacetylase 6<br>OS=Homo sapiens<br>GN=HDAC6<br>PE=1 SV=2 - [HDAC6_HUMAN]                                     | 1.40  | 1 | 2  | 2  | 5    | 1.247 | 0.718 | 0.667 | 0.971 | 13.11   | 1.40  | 3   | 5    | 1215 | 131.3 | 5.30 |
| Q9HCE5 | N6-adenosine-methyltransferase subunit<br>METTL14<br>OS=Homo sapiens<br>GN=METTL14<br>PE=1 SV=2 - [MET14_HUMAN]       | 5.92  | 1 | 3  | 3  | 7    | 1.209 | 0.969 | 0.743 | 0.971 | 14.41   | 5.92  | 5   | 7    | 456  | 52.1  | 6.21 |
| P62942 | Peptidyl-prolyl isomerase<br>FKBP1A<br>OS=Homo sapiens<br>GN=FKBP1A<br>PE=1 SV=2 - [FKB1A_HUMAN]                      | 59.26 | 1 | 4  | 4  | 117  | 1.099 | 1.292 | 1.430 | 0.971 | 340.89  | 59.26 | 6   | 117  | 108  | 11.9  | 8.16 |
| Q9UI12 | V-type proton ATPase subunit H<br>OS=Homo sapiens<br>GN=ATP6V1H<br>PE=1 SV=1 - [VATH_HUMAN]                           | 26.29 | 1 | 10 | 10 | 35   | 0.983 | 0.996 | 1.014 | 0.971 | 97.27   | 26.29 | 17  | 35   | 483  | 55.8  | 6.48 |
| Q9UKZ4 | Teneurin-1<br>OS=Homo sapiens<br>GN=TENM1<br>PE=1 SV=2 - [TEN1_HUMAN]                                                 | 0.88  | 1 | 1  | 2  | 2    | 1.384 | 1.381 | 1.762 | 0.971 | 1.74    | 0.88  | 2   | 2    | 2725 | 304.8 | 6.42 |
| O00300 | Tumor necrosis factor receptor superfamily member 11B<br>OS=Homo sapiens<br>GN=TNFRSF11B<br>PE=1 SV=3 - [TR11B_HUMAN] | 17.71 | 2 | 8  | 8  | 24   | 0.694 | 0.466 | 0.440 | 0.971 | 50.55   | 17.71 | 11  | 24   | 401  | 46.0  | 8.29 |
| Q9H497 | Torsin-3A<br>OS=Homo sapiens<br>GN=TOR3A<br>PE=1 SV=1 - [TOR3A_HUMAN]                                                 | 4.53  | 1 | 2  | 2  | 4    | 0.757 | 0.820 | 0.929 | 0.971 | 2.54    | 4.53  | 2   | 4    | 397  | 46.2  | 6.01 |
| Q9P2E9 | Ribosome-binding protein 1<br>OS=Homo sapiens<br>GN=RRBP1<br>PE=1 SV=4 - [RRBP1_HUMAN]                                | 67.94 | 3 | 82 | 84 | 1043 | 0.873 | 0.892 | 0.861 | 0.971 | 2436.23 | 67.94 | 139 | 1043 | 1410 | 152.4 | 8.60 |

|        |                                                                                                                 |       |   |    |    |     |       |       |       |       |        |       |    |     |      |       |       |
|--------|-----------------------------------------------------------------------------------------------------------------|-------|---|----|----|-----|-------|-------|-------|-------|--------|-------|----|-----|------|-------|-------|
| P23396 | 40S ribosomal protein S3<br>OS=Homo sapiens<br>GN=RPS3<br>PE=1 SV=2 - [RPS3_HUMAN]                              | 76.13 | 1 | 22 | 22 | 135 | 0.878 | 0.893 | 0.875 | 0.971 | 299.04 | 76.13 | 36 | 135 | 243  | 26.7  | 9.66  |
| Q9BYT8 | Neurolysin, mitochondrial<br>OS=Homo sapiens<br>GN=NLN PE=1 SV=1 - [NEUL_HUMAN]                                 | 24.72 | 1 | 16 | 16 | 54  | 1.015 | 1.103 | 0.988 | 0.972 | 145.61 | 24.72 | 22 | 54  | 704  | 80.6  | 6.64  |
| Q0VDF9 | Heat shock 70 kDa protein 14<br>OS=Homo sapiens<br>GN=HSPA14<br>PE=1 SV=1 - [HSP7E_HUMAN]                       | 13.56 | 1 | 6  | 6  | 12  | 0.782 | 0.757 | 0.813 | 0.972 | 34.25  | 13.56 | 8  | 12  | 509  | 54.8  | 5.59  |
| Q8IZT6 | Abnormal spindle-like microcephaly-associated protein<br>OS=Homo sapiens<br>GN=ASPM<br>PE=1 SV=2 - [ASPM_HUMAN] | 1.64  | 1 | 5  | 6  | 6   | 1.257 | 0.909 | 0.811 | 0.972 | 7.92   | 1.64  | 6  | 6   | 3477 | 409.5 | 10.45 |
| Q5W111 | SPRY domain-containing protein 7<br>OS=Homo sapiens<br>GN=SPRYD7<br>PE=1 SV=2 - [SPRY7_HUMAN]                   | 19.39 | 1 | 3  | 3  | 9   | 0.670 | 0.611 | 0.652 | 0.972 | 18.56  | 19.39 | 5  | 9   | 196  | 21.7  | 6.70  |
| P61962 | DDB1- and CUL4-associated factor 7<br>OS=Homo sapiens<br>GN=DCAF7<br>PE=1 SV=1 - [DCAF7_HUMAN]                  | 20.18 | 1 | 6  | 6  | 13  | 1.191 | 1.245 | 1.381 | 0.972 | 25.25  | 20.18 | 10 | 13  | 342  | 38.9  | 5.52  |
| Q9GZP9 | Derlin-2<br>OS=Homo sapiens<br>GN=DERL2<br>PE=1 SV=1 - [DERL2_HUMAN]                                            | 4.60  | 1 | 1  | 1  | 1   | 0.726 | 0.596 | 0.550 | 0.972 | 3.63   | 4.60  | 1  | 1   | 239  | 27.5  | 7.28  |
| P09417 | Dihydropteridine reductase<br>OS=Homo sapiens<br>GN=QDPR<br>PE=1 SV=2 - [DHPR_HUMAN]                            | 20.90 | 1 | 4  | 4  | 16  | 1.042 | 0.921 | 0.927 | 0.972 | 39.63  | 20.90 | 6  | 16  | 244  | 25.8  | 7.37  |
| Q76FK4 | Nucleolar protein 8<br>OS=Homo sapiens<br>GN=NOL8<br>PE=1 SV=1 - [NOL8_HUMAN]                                   | 3.94  | 2 | 2  | 3  | 4   | 0.842 | 1.042 | 1.233 | 0.972 | 3.54   | 3.94  | 3  | 4   | 1167 | 131.5 | 7.09  |

|        |                                                                                                         |       |   |    |    |     |       |       |       |       |        |       |    |     |      |       |      |
|--------|---------------------------------------------------------------------------------------------------------|-------|---|----|----|-----|-------|-------|-------|-------|--------|-------|----|-----|------|-------|------|
| Q96LZ7 | Regulator of microtubule dynamics protein 2<br>OS=Homo sapiens<br>GN=RMDN2<br>PE=1 SV=2 - [RMD2_HUMAN]  | 7.56  | 1 | 3  | 3  | 8   | 1.274 | 0.626 | 0.916 | 0.972 | 12.31  | 7.56  | 5  | 8   | 410  | 47.4  | 6.54 |
| Q8IUZ5 | 5-phosphohydroxy-L-lysine phospho-lyase<br>OS=Homo sapiens<br>GN=PHYKPL<br>PE=1 SV=1 - [AT2L2_HUMAN]    | 19.33 | 1 | 7  | 7  | 20  | 1.123 | 0.982 | 1.052 | 0.972 | 52.58  | 19.33 | 12 | 20  | 450  | 49.7  | 6.76 |
| P08621 | U1 small nuclear ribonucleoprotein 70 kDa<br>OS=Homo sapiens<br>GN=SNRNP70<br>PE=1 SV=2 - [RU17_HUMAN]  | 31.12 | 1 | 15 | 15 | 110 | 1.011 | 1.307 | 1.045 | 0.972 | 256.63 | 31.12 | 25 | 110 | 437  | 51.5  | 9.94 |
| P0CW22 | 40S ribosomal protein S17-like<br>OS=Homo sapiens<br>GN=RPS17L<br>PE=1 SV=1 - [RS17L_HUMAN]             | 60.00 | 1 | 11 | 11 | 42  | 0.994 | 1.222 | 0.978 | 0.972 | 108.89 | 60.00 | 16 | 42  | 135  | 15.5  | 9.85 |
| P78396 | Cyclin-A1<br>OS=Homo sapiens<br>GN=CCNA1<br>PE=1 SV=1 - [CCNA1_HUMAN]                                   | 2.58  | 1 | 1  | 1  | 1   | 0.674 | 0.817 | 0.796 | 0.972 | 3.62   | 2.58  | 1  | 1   | 465  | 52.3  | 5.10 |
| Q8WUF8 | Protein FAM172A<br>OS=Homo sapiens<br>GN=FAM172A<br>PE=2 SV=1 - [F172A_HUMAN]                           | 8.65  | 1 | 3  | 3  | 5   | 0.650 | 1.007 | 1.017 | 0.972 | 7.63   | 8.65  | 4  | 5   | 416  | 47.9  | 6.09 |
| Q9NYK5 | 39S ribosomal protein L39, mitochondrial<br>OS=Homo sapiens<br>GN=MRPL39<br>PE=1 SV=3 - [RM39_HUMAN]    | 17.46 | 1 | 6  | 6  | 9   | 1.032 | 0.985 | 0.783 | 0.972 | 19.60  | 17.46 | 8  | 9   | 338  | 38.7  | 7.65 |
| Q9P218 | Collagen alpha-1(XX) chain<br>OS=Homo sapiens<br>GN=COL20A1<br>PE=1 SV=4 - [COKA1_HUMAN]                | 1.40  | 1 | 1  | 1  | 1   | 0.926 | 0.845 | 1.010 | 0.972 | 0.00   | 1.40  | 1  | 1   | 1284 | 135.7 | 8.06 |
| O60506 | Heterogeneous nuclear ribonucleoprotein Q<br>OS=Homo sapiens<br>GN=SYNCRIP<br>PE=1 SV=2 - [HNRPQ_HUMAN] | 42.38 | 1 | 21 | 29 | 238 | 0.913 | 1.122 | 0.838 | 0.972 | 648.47 | 42.38 | 50 | 238 | 623  | 69.6  | 8.59 |

|        |                                                                                                                   |       |   |    |    |    |       |       |       |       |        |       |    |    |      |       |      |
|--------|-------------------------------------------------------------------------------------------------------------------|-------|---|----|----|----|-------|-------|-------|-------|--------|-------|----|----|------|-------|------|
| Q9Y6E2 | Basic leucine zipper and W2 domain-containing protein 2<br>OS=Homo sapiens<br>GN=BZW2<br>PE=1 SV=1 - [BZW2_HUMAN] | 21.96 | 1 | 10 | 11 | 30 | 0.669 | 1.012 | 0.826 | 0.973 | 63.03  | 21.96 | 14 | 30 | 419  | 48.1  | 6.68 |
| Q9P2K5 | Myelin expression factor 2<br>OS=Homo sapiens<br>GN=MYEF2<br>PE=1 SV=3 - [MYEF2_HUMAN]                            | 8.17  | 1 | 5  | 5  | 6  | 1.387 | 1.425 | 2.166 | 0.973 | 14.16  | 8.17  | 6  | 6  | 600  | 64.1  | 8.75 |
| O60934 | Nibrin<br>OS=Homo sapiens<br>GN=NBN PE=1 SV=1 - [NBN_HUMAN]                                                       | 14.19 | 1 | 8  | 9  | 20 | 0.841 | 0.980 | 0.863 | 0.973 | 39.30  | 14.19 | 10 | 20 | 754  | 84.9  | 6.90 |
| O15541 | RING finger protein 113A<br>OS=Homo sapiens<br>GN=RNF113A<br>PE=1 SV=1 - [R113A_HUMAN]                            | 16.03 | 1 | 5  | 6  | 8  | 0.848 | 1.004 | 0.769 | 0.973 | 9.63   | 16.03 | 6  | 8  | 343  | 38.8  | 5.69 |
| O75122 | CLIP-associated protein 2<br>OS=Homo sapiens<br>GN=CLASP2<br>PE=1 SV=2 - [CLAP2_HUMAN]                            | 7.57  | 1 | 9  | 9  | 18 | 0.788 | 1.014 | 1.150 | 0.973 | 44.94  | 7.57  | 12 | 18 | 1294 | 141.0 | 8.47 |
| Q81Y47 | Kelch repeat and BTB domain-containing protein 2<br>OS=Homo sapiens<br>GN=KBTBD2<br>PE=1 SV=2 - [KBTB2_HUMAN]     | 0.96  | 1 | 1  | 1  | 1  | 1.357 | 0.964 | 0.908 | 0.973 | 2.21   | 0.96  | 1  | 1  | 623  | 71.3  | 5.62 |
| Q6ZT12 | E3 ubiquitin-protein ligase UBR3<br>OS=Homo sapiens<br>GN=UBR3<br>PE=2 SV=2 - [UBR3_HUMAN]                        | 1.06  | 1 | 2  | 2  | 8  | 0.709 | 1.065 | 0.949 | 0.973 | 17.82  | 1.06  | 3  | 8  | 1888 | 212.3 | 6.10 |
| Q12913 | Receptor-type tyrosine-protein phosphatase eta<br>OS=Homo sapiens<br>GN=PTPRJ<br>PE=1 SV=3 - [PTPRJ_HUMAN]        | 0.90  | 1 | 1  | 1  | 4  | 1.578 | 0.480 | 0.985 | 0.973 | 9.70   | 0.90  | 2  | 4  | 1337 | 145.9 | 5.58 |
| Q99447 | Ethanolamine-phosphate cytidyltransferase<br>OS=Homo sapiens<br>GN=PCYT2<br>PE=1 SV=1 - [PCYT2_HUMAN]             | 28.28 | 1 | 10 | 10 | 49 | 1.118 | 0.935 | 1.322 | 0.973 | 109.21 | 28.28 | 17 | 49 | 389  | 43.8  | 6.92 |

|        |                                                                                                           |       |   |   |    |     |       |       |       |       |        |       |    |     |      |       |      |
|--------|-----------------------------------------------------------------------------------------------------------|-------|---|---|----|-----|-------|-------|-------|-------|--------|-------|----|-----|------|-------|------|
| Q9BPX6 | Calcium uptake protein 1, mitochondrial<br>OS=Homo sapiens<br>GN=MICU1<br>PE=1 SV=1 - [MICU1_HUMAN]       | 15.34 | 1 | 8 | 8  | 21  | 0.764 | 0.715 | 0.915 | 0.973 | 48.29  | 15.34 | 13 | 21  | 476  | 54.3  | 8.41 |
| P43307 | Translocon-associated protein subunit alpha<br>OS=Homo sapiens<br>GN=SSR1<br>PE=1 SV=3 - [SSRA_HUMAN]     | 11.89 | 1 | 3 | 3  | 123 | 0.809 | 0.935 | 0.818 | 0.973 | 278.50 | 11.89 | 6  | 123 | 286  | 32.2  | 4.49 |
| O95841 | Angiotensin-related protein 1<br>OS=Homo sapiens<br>GN=ANGPTL1<br>PE=2 SV=1 - [ANGL1_HUMAN]               | 1.43  | 1 | 1 | 1  | 1   | 1.359 | 1.012 | 1.227 | 0.973 | 2.11   | 1.43  | 1  | 1   | 491  | 56.7  | 8.21 |
| Q9H2H8 | Peptidyl-prolyl cis-trans isomerase-like 3<br>OS=Homo sapiens<br>GN=PPIL3<br>PE=1 SV=1 - [PPIL3_HUMAN]    | 47.83 | 1 | 8 | 8  | 23  | 1.172 | 0.866 | 0.768 | 0.973 | 45.56  | 47.83 | 13 | 23  | 161  | 18.1  | 6.79 |
| Q9BYJ9 | YTH domain-containing family protein 1<br>OS=Homo sapiens<br>GN=YTHDF1<br>PE=1 SV=1 - [YTHD1_HUMAN]       | 4.11  | 1 | 1 | 2  | 13  | 0.952 | 0.765 | 0.798 | 0.974 | 22.41  | 4.11  | 4  | 13  | 559  | 60.8  | 8.79 |
| Q9Y6K5 | 2'-5'-oligoadenylate synthase 3<br>OS=Homo sapiens<br>GN=OAS3<br>PE=1 SV=3 - [OAS3_HUMAN]                 | 4.78  | 1 | 5 | 5  | 13  | 7.193 | 1.554 | 1.029 | 0.974 | 31.50  | 4.78  | 8  | 13  | 1087 | 121.1 | 8.40 |
| P02689 | Myelin P2 protein<br>OS=Homo sapiens<br>GN=PMP2<br>PE=1 SV=3 - [MYP2_HUMAN]                               | 28.79 | 2 | 3 | 4  | 7   | 1.215 | 1.155 | 1.186 | 0.974 | 8.47   | 28.79 | 5  | 7   | 132  | 14.9  | 9.83 |
| Q15155 | Nodal modulator 1<br>OS=Homo sapiens<br>GN=NOMO1<br>PE=1 SV=5 - [NOMO1_HUMAN]                             | 20.13 | 1 | 3 | 21 | 98  | 0.874 | 0.958 | 0.993 | 0.974 | 272.36 | 20.13 | 33 | 98  | 1222 | 134.2 | 5.81 |
| Q8N5K1 | CDGSH iron-sulfur domain-containing protein 2<br>OS=Homo sapiens<br>GN=CISD2<br>PE=1 SV=1 - [CISD2_HUMAN] | 40.00 | 1 | 5 | 5  | 19  | 0.888 | 0.875 | 0.977 | 0.974 | 34.90  | 40.00 | 8  | 19  | 135  | 15.3  | 9.61 |

|        |                                                                                                         |       |   |    |    |     |       |       |       |       |        |       |    |     |      |       |       |
|--------|---------------------------------------------------------------------------------------------------------|-------|---|----|----|-----|-------|-------|-------|-------|--------|-------|----|-----|------|-------|-------|
| Q9Y4I1 | Unconventional myosin-Va<br>OS=Homo sapiens<br>GN=MYOSA<br>PE=1 SV=2 - [MYOSA_HUMAN]                    | 10.03 | 1 | 17 | 21 | 42  | 1.133 | 1.089 | 1.140 | 0.974 | 92.28  | 10.03 | 28 | 42  | 1855 | 215.3 | 8.48  |
| P51659 | Peroxisomal multifunctional enzyme type 2<br>OS=Homo sapiens<br>GN=HSD17B4<br>PE=1 SV=3 - [DHB4_HUMAN]  | 41.44 | 2 | 28 | 28 | 162 | 1.070 | 1.015 | 1.247 | 0.974 | 390.69 | 41.44 | 45 | 162 | 736  | 79.6  | 8.84  |
| Q8NB90 | Spermatogenesis-associated protein 5<br>OS=Homo sapiens<br>GN=SPATA5<br>PE=1 SV=3 - [SPATA5_HUMAN]      | 16.69 | 1 | 10 | 12 | 34  | 1.059 | 0.987 | 0.825 | 0.974 | 60.72  | 16.69 | 18 | 34  | 893  | 97.8  | 5.66  |
| P07948 | Tyrosine-protein kinase Lyn<br>OS=Homo sapiens<br>GN=LYN PE=1 SV=3 - [LYN_HUMAN]                        | 14.06 | 7 | 4  | 7  | 25  | 0.806 | 1.341 | 1.096 | 0.974 | 50.33  | 14.06 | 11 | 25  | 512  | 58.5  | 7.11  |
| O94822 | E3 ubiquitin-protein ligase listerin<br>OS=Homo sapiens<br>GN=LTN1 PE=1 SV=6 - [LTN1_HUMAN]             | 2.77  | 1 | 6  | 6  | 9   | 0.789 | 0.833 | 0.839 | 0.974 | 16.19  | 2.77  | 7  | 9   | 1766 | 200.4 | 6.25  |
| Q147X3 | N-alpha-acetyltransferase 30<br>OS=Homo sapiens<br>GN=NAA30<br>PE=1 SV=1 - [NAA30_HUMAN]                | 17.40 | 1 | 4  | 4  | 6   | 0.982 | 0.901 | 1.129 | 0.975 | 22.26  | 17.40 | 5  | 6   | 362  | 39.3  | 5.52  |
| Q9NQR7 | Coiled-coil domain-containing protein 177<br>OS=Homo sapiens<br>GN=CCDC177<br>PE=2 SV=3 - [CC177_HUMAN] | 4.10  | 1 | 1  | 2  | 3   | 1.961 | 1.362 | 1.139 | 0.975 | 2.75   | 4.10  | 2  | 3   | 707  | 79.7  | 10.74 |
| Q9Y678 | Coatamer subunit gamma-1<br>OS=Homo sapiens<br>GN=COPG1<br>PE=1 SV=1 - [COPG1_HUMAN]                    | 51.72 | 1 | 36 | 38 | 180 | 0.969 | 0.872 | 0.892 | 0.975 | 465.50 | 51.72 | 59 | 180 | 874  | 97.7  | 5.47  |
| Q9Y6I9 | Testis-expressed sequence 264 protein<br>OS=Homo sapiens<br>GN=TEX264<br>PE=1 SV=1 - [TX264_HUMAN]      | 11.18 | 1 | 3  | 3  | 9   | 1.026 | 0.803 | 0.985 | 0.975 | 11.20  | 11.18 | 6  | 9   | 313  | 34.2  | 4.86  |

|        |                                                                                                                                       |       |   |    |    |    |       |       |       |       |        |       |    |    |      |       |      |
|--------|---------------------------------------------------------------------------------------------------------------------------------------|-------|---|----|----|----|-------|-------|-------|-------|--------|-------|----|----|------|-------|------|
| P08034 | Gap junction<br>beta-1 protein<br>OS=Homo<br>sapiens<br>GN=GJB1 PE=1<br>SV=1 -<br>[CXB1_HUMAN]                                        | 6.01  | 1 | 1  | 1  | 1  | 1.459 | 1.988 | 0.361 | 0.975 | 2.87   | 6.01  | 1  | 1  | 283  | 32.0  | 8.94 |
| P11055 | Myosin-3<br>OS=Homo<br>sapiens<br>GN=MYH3<br>PE=1 SV=3 -<br>[MYH3_HUMAN]                                                              | 4.02  | 1 | 1  | 8  | 75 | 0.772 | 0.627 | 0.770 | 0.975 | 132.79 | 4.02  | 11 | 75 | 1940 | 223.8 | 5.81 |
| O95714 | E3 ubiquitin-<br>protein ligase<br>HERC2<br>OS=Homo<br>sapiens<br>GN=HERC2<br>PE=1 SV=2 -<br>[HERC2_HUMAN<br>]                        | 2.19  | 1 | 8  | 8  | 19 | 0.757 | 0.836 | 0.820 | 0.975 | 29.64  | 2.19  | 9  | 19 | 4834 | 526.9 | 6.28 |
| Q5QJ74 | Tubulin-specific<br>chaperone<br>cofactor E-like<br>protein<br>OS=Homo<br>sapiens<br>GN=TBCEL<br>PE=2 SV=2 -<br>[TBCEL_HUMAN<br>]     | 22.64 | 1 | 6  | 7  | 13 | 0.991 | 1.392 | 1.186 | 0.976 | 36.84  | 22.64 | 8  | 13 | 424  | 48.2  | 5.38 |
| Q9H2G2 | STE20-like<br>serine/threonin<br>e-protein<br>kinase<br>OS=Homo<br>sapiens<br>GN=SLK PE=1<br>SV=1 -<br>[SLK_HUMAN]                    | 26.07 | 3 | 32 | 34 | 95 | 1.018 | 1.227 | 1.090 | 0.976 | 196.54 | 26.07 | 48 | 95 | 1235 | 142.6 | 5.15 |
| Q9H3S7 | Tyrosine-<br>protein<br>phosphatase<br>non-receptor<br>type 23<br>OS=Homo<br>sapiens<br>GN=PTPN23<br>PE=1 SV=1 -<br>[PTN23_HUMAN<br>] | 18.28 | 1 | 25 | 25 | 61 | 1.199 | 0.918 | 1.024 | 0.976 | 130.06 | 18.28 | 40 | 61 | 1636 | 178.9 | 6.92 |
| Q9UNL2 | Translocon-<br>associated<br>protein subunit<br>gamma<br>OS=Homo<br>sapiens<br>GN=SSR3<br>PE=1 SV=1 -<br>[SSRG_HUMAN]                 | 18.38 | 1 | 4  | 4  | 66 | 0.849 | 0.898 | 0.839 | 0.976 | 253.25 | 18.38 | 5  | 66 | 185  | 21.1  | 9.61 |
| Q68DH5 | LMBR1 domain-<br>containing<br>protein 2<br>OS=Homo<br>sapiens<br>GN=LMBRD2<br>PE=1 SV=1 -<br>[LMBD2_HUMAN<br>]                       | 1.58  | 1 | 1  | 1  | 2  | 0.942 |       |       | 0.976 | 5.31   | 1.58  | 1  | 2  | 695  | 81.1  | 7.50 |



|        |                                                                                                                               |       |   |    |    |     |       |       |       |       |        |       |    |     |      |       |      |
|--------|-------------------------------------------------------------------------------------------------------------------------------|-------|---|----|----|-----|-------|-------|-------|-------|--------|-------|----|-----|------|-------|------|
| P15170 | Eukaryotic peptide chain release factor GTP-binding subunit ERF3A<br>OS=Homo sapiens<br>GN=GSPT1<br>PE=1 SV=1 - [ERF3A_HUMAN] | 40.48 | 1 | 8  | 26 | 94  | 1.165 | 0.955 | 0.984 | 0.976 | 216.00 | 40.48 | 40 | 94  | 499  | 55.7  | 5.62 |
| P61018 | Ras-related protein Rab-4B<br>OS=Homo sapiens<br>GN=RAB4B<br>PE=1 SV=1 - [RAB4B_HUMAN]                                        | 23.47 | 2 | 3  | 5  | 29  | 0.910 | 0.860 | 0.926 | 0.976 | 64.43  | 23.47 | 9  | 29  | 213  | 23.6  | 6.06 |
| O00178 | GTP-binding protein 1<br>OS=Homo sapiens<br>GN=GTPBP1<br>PE=1 SV=3 - [GTPBP1_HUMAN]                                           | 23.17 | 1 | 11 | 11 | 27  | 1.045 | 1.063 | 0.949 | 0.976 | 81.78  | 23.17 | 19 | 27  | 669  | 72.4  | 8.34 |
| Q7L8J4 | SH3 domain-binding protein 5-like<br>OS=Homo sapiens<br>GN=SH3BP5L<br>PE=1 SV=1 - [3BP5L_HUMAN]                               | 5.85  | 1 | 2  | 2  | 5   | 0.873 | 1.048 | 1.216 | 0.976 | 19.88  | 5.85  | 4  | 5   | 393  | 43.5  | 5.77 |
| Q8WUD1 | Ras-related protein Rab-2B<br>OS=Homo sapiens<br>GN=RAB2B<br>PE=1 SV=1 - [RAB2B_HUMAN]                                        | 38.43 | 1 | 1  | 6  | 26  | 1.188 | 1.103 | 1.421 | 0.976 | 75.94  | 38.43 | 12 | 26  | 216  | 24.2  | 7.83 |
| O75165 | DnaJ homolog subfamily C member 13<br>OS=Homo sapiens<br>GN=DNAJC13<br>PE=1 SV=5 - [DJC13_HUMAN]                              | 23.85 | 1 | 46 | 46 | 118 | 1.024 | 0.960 | 0.906 | 0.976 | 301.73 | 23.85 | 64 | 118 | 2243 | 254.3 | 6.74 |
| Q2Y0W8 | Electroneutral sodium bicarbonate exchanger 1<br>OS=Homo sapiens<br>GN=SLC4A8<br>PE=1 SV=1 - [S4A8_HUMAN]                     | 1.56  | 2 | 1  | 2  | 2   | 1.138 | 1.112 | 1.208 | 0.976 | 4.72   | 1.56  | 2  | 2   | 1093 | 122.9 | 6.68 |
| Q9UID3 | Vacuolar protein sorting-associated protein 51 homolog<br>OS=Homo sapiens<br>GN=VPS51<br>PE=1 SV=2 - [VPS51_HUMAN]            | 9.08  | 1 | 6  | 6  | 11  | 0.729 | 1.202 | 1.227 | 0.976 | 23.41  | 9.08  | 9  | 11  | 782  | 86.0  | 6.47 |

|        |                                                                                                        |       |   |    |    |     |       |       |       |       |         |       |    |     |     |      |       |
|--------|--------------------------------------------------------------------------------------------------------|-------|---|----|----|-----|-------|-------|-------|-------|---------|-------|----|-----|-----|------|-------|
| P40926 | Malate dehydrogenase, mitochondrial<br>OS=Homo sapiens<br>GN=MDH2<br>PE=1 SV=3 - [MDHM_HUMAN]          | 52.66 | 2 | 15 | 15 | 347 | 1.077 | 1.223 | 1.025 | 0.977 | 786.27  | 52.66 | 27 | 347 | 338 | 35.5 | 8.68  |
| P62829 | 60S ribosomal protein L23<br>OS=Homo sapiens<br>GN=RPL23<br>PE=1 SV=1 - [RL23_HUMAN]                   | 50.00 | 1 | 6  | 6  | 67  | 0.887 | 0.907 | 0.810 | 0.977 | 147.18  | 50.00 | 11 | 67  | 140 | 14.9 | 10.51 |
| Q9Y3C8 | Ubiquitin-fold modifier-conjugating enzyme 1<br>OS=Homo sapiens<br>GN=UFC1<br>PE=1 SV=3 - [UFC1_HUMAN] | 14.97 | 1 | 4  | 4  | 10  | 0.870 | 1.149 | 0.715 | 0.977 | 21.59   | 14.97 | 4  | 10  | 167 | 19.4 | 7.40  |
| P78318 | Immunoglobulin-binding protein 1<br>OS=Homo sapiens<br>GN=IGBP1<br>PE=1 SV=1 - [IGBP1_HUMAN]           | 19.76 | 1 | 7  | 7  | 15  | 1.244 | 1.069 | 1.161 | 0.977 | 38.61   | 19.76 | 11 | 15  | 339 | 39.2 | 5.38  |
| P00505 | Aspartate aminotransferase, mitochondrial<br>OS=Homo sapiens<br>GN=GOT2<br>PE=1 SV=3 - [AATM_HUMAN]    | 46.28 | 1 | 23 | 23 | 111 | 1.095 | 1.422 | 1.168 | 0.977 | 252.87  | 46.28 | 34 | 111 | 430 | 47.5 | 9.01  |
| Q9HAB8 | Phosphopantothenate--cysteine ligase<br>OS=Homo sapiens<br>GN=PPCS<br>PE=1 SV=2 - [PPCS_HUMAN]         | 32.48 | 1 | 11 | 11 | 38  | 0.923 | 0.941 | 0.801 | 0.977 | 92.02   | 32.48 | 19 | 38  | 311 | 34.0 | 6.71  |
| P30566 | Adenylosuccinate lyase<br>OS=Homo sapiens<br>GN=ADSL PE=1 SV=2 - [PUR8_HUMAN]                          | 17.36 | 1 | 8  | 8  | 17  | 0.805 | 1.317 | 1.023 | 0.977 | 44.81   | 17.36 | 11 | 17  | 484 | 54.9 | 7.11  |
| O15240 | Neurosecretory protein VGF<br>OS=Homo sapiens<br>GN=VGF PE=1 SV=2 - [VGF_HUMAN]                        | 2.28  | 1 | 1  | 1  | 1   | 1.523 | 0.939 | 1.366 | 0.977 | 0.00    | 2.28  | 1  | 1   | 615 | 67.2 | 4.78  |
| P18669 | Phosphoglycerate mutase 1<br>OS=Homo sapiens<br>GN=PGAM1<br>PE=1 SV=2 - [PGAM1_HUMAN]                  | 76.77 | 1 | 11 | 21 | 758 | 1.226 | 0.836 | 1.000 | 0.977 | 2255.41 | 76.77 | 37 | 758 | 254 | 28.8 | 7.18  |

|        |                                                                                                                                  |       |   |    |    |     |       |       |       |       |        |       |    |     |      |       |      |
|--------|----------------------------------------------------------------------------------------------------------------------------------|-------|---|----|----|-----|-------|-------|-------|-------|--------|-------|----|-----|------|-------|------|
| P51451 | Tyrosine-<br>protein kinase<br>Blk OS=Homo<br>sapiens<br>GN=BLK PE=1<br>SV=3 -<br>[BLK_HUMAN]                                    | 7.52  | 6 | 2  | 3  | 15  | 0.793 | 1.128 | 1.026 | 0.977 | 24.44  | 7.52  | 4  | 15  | 505  | 57.7  | 7.87 |
| Q9Y4E1 | WASH complex<br>subunit<br>FAM21C<br>OS=Homo<br>sapiens<br>GN=FAM21C<br>PE=1 SV=3 -<br>[FAM21C_HUMAN<br>]                        | 22.15 | 2 | 3  | 22 | 76  | 1.409 | 1.211 | 0.898 | 0.977 | 185.99 | 22.15 | 36 | 76  | 1318 | 144.6 | 4.79 |
| Q9BQB6 | Vitamin K<br>epoxide<br>reductase<br>complex<br>subunit 1<br>OS=Homo<br>sapiens<br>GN=VKORC1<br>PE=1 SV=1 -<br>[VKOR1_HUMA<br>N] | 4.91  | 1 | 2  | 2  | 11  | 0.929 | 1.004 | 0.753 | 0.977 | 16.05  | 4.91  | 2  | 11  | 163  | 18.2  | 9.36 |
| Q6ZMN8 | Cydin-12<br>OS=Homo<br>sapiens<br>GN=CCNI2<br>PE=2 SV=1 -<br>[CCNI2_HUMAN<br>]                                                   | 8.13  | 1 | 2  | 2  | 3   | 1.067 | 0.676 | 0.927 | 0.977 | 0.00   | 8.13  | 2  | 3   | 369  | 40.6  | 7.90 |
| Q96F86 | Enhancer of<br>mRNA-<br>decapping<br>protein 3<br>OS=Homo<br>sapiens<br>GN=EDC3<br>PE=1 SV=1 -<br>[EDC3_HUMAN]                   | 14.17 | 1 | 6  | 7  | 19  | 1.051 | 0.901 | 1.127 | 0.978 | 45.03  | 14.17 | 11 | 19  | 508  | 56.0  | 7.11 |
| Q9BTV6 | Diphthamide<br>biosynthesis<br>protein 7<br>OS=Homo<br>sapiens<br>GN=DPH7<br>PE=1 SV=2 -<br>[DPH7_HUMAN]                         | 5.75  | 1 | 2  | 2  | 3   | 0.979 | 1.146 | 1.046 | 0.978 | 4.21   | 5.75  | 2  | 3   | 452  | 50.5  | 6.60 |
| Q9BUT9 | Protein<br>FAM195A<br>OS=Homo<br>sapiens<br>GN=FAM195A<br>PE=1 SV=2 -<br>[F195A_HUMAN<br>]                                       | 3.75  | 1 | 1  | 1  | 2   | 0.987 | 1.201 | 0.682 | 0.978 | 2.16   | 3.75  | 1  | 2   | 160  | 17.8  | 9.41 |
| O00299 | Chloride<br>intracellular<br>channel<br>protein 1<br>OS=Homo<br>sapiens<br>GN=CLIC1<br>PE=1 SV=4 -<br>[CLIC1_HUMAN]              | 72.61 | 2 | 13 | 14 | 125 | 1.086 | 0.953 | 0.996 | 0.978 | 305.23 | 72.61 | 21 | 125 | 241  | 26.9  | 5.17 |
| P49757 | Protein numb<br>homolog<br>OS=Homo<br>sapiens<br>GN=NUMB<br>PE=1 SV=2 -<br>[NUMB_HUMAN]                                          | 23.96 | 1 | 13 | 16 | 51  | 1.204 | 1.020 | 1.262 | 0.978 | 104.32 | 23.96 | 27 | 51  | 651  | 70.8  | 8.51 |

|        |                                                                                                                                                                              |       |   |    |    |     |       |       |       |       |        |       |    |     |      |       |      |
|--------|------------------------------------------------------------------------------------------------------------------------------------------------------------------------------|-------|---|----|----|-----|-------|-------|-------|-------|--------|-------|----|-----|------|-------|------|
| Q6NUK4 | Receptor<br>expression-<br>enhancing<br>protein 3<br>OS=Homo<br>sapiens<br>GN=REEP3<br>PE=1 SV=1 -<br>[REEP3_HUMAN<br>]<br>Protein<br>arginine N-<br>methyltransfer<br>ase 1 | 8.63  | 1 | 2  | 2  | 4   | 1.278 | 1.157 | 2.639 | 0.978 | 9.38   | 8.63  | 3  | 4   | 255  | 29.2  | 9.57 |
| Q99873 | OS=Homo<br>sapiens<br>GN=PRMT1<br>PE=1 SV=2 -<br>[ANM1_HUMAN]<br>CLIP-<br>associating<br>protein 1                                                                           | 45.15 | 2 | 15 | 15 | 63  | 1.064 | 0.827 | 0.751 | 0.978 | 150.36 | 45.15 | 26 | 63  | 361  | 41.5  | 5.43 |
| Q7Z460 | OS=Homo<br>sapiens<br>GN=CLASP1<br>PE=1 SV=1 -<br>[CLAP1_HUMAN<br>]<br>39S ribosomal<br>protein L37,<br>mitochondrial                                                        | 11.96 | 1 | 19 | 19 | 58  | 0.946 | 0.915 | 0.992 | 0.978 | 127.45 | 11.96 | 26 | 58  | 1538 | 169.3 | 9.03 |
| Q9BZE1 | OS=Homo<br>sapiens<br>GN=MRPL37<br>PE=1 SV=2 -<br>[RM37_HUMAN]                                                                                                               | 29.31 | 1 | 11 | 12 | 22  | 1.113 | 0.941 | 0.892 | 0.978 | 54.16  | 29.31 | 16 | 22  | 423  | 48.1  | 8.59 |
| P23497 | Nuclear<br>autoantigen<br>Sp-100<br>OS=Homo<br>sapiens<br>GN=SP100<br>PE=1 SV=3 -<br>[SP100_HUMAN]                                                                           | 13.88 | 2 | 11 | 14 | 49  | 1.411 | 1.274 | 1.404 | 0.978 | 101.88 | 13.88 | 22 | 49  | 879  | 100.4 | 8.22 |
| Q15173 | Serine/threoni<br>ne-protein<br>phosphatase<br>2A 56 kDa<br>regulatory<br>subunit beta<br>isoform<br>OS=Homo<br>sapiens<br>GN=PPP2R5B<br>PE=1 SV=1 -<br>[ZAS5B_HUMAN]        | 12.27 | 1 | 4  | 5  | 14  | 2.136 | 1.022 | 1.218 | 0.978 | 37.23  | 12.27 | 9  | 14  | 497  | 57.4  | 6.71 |
| P20645 | Cation-<br>dependent<br>mannose-6-<br>phosphate<br>receptor<br>OS=Homo<br>sapiens<br>GN=M6PR<br>PE=1 SV=1 -<br>[MPRD_HUMAN]                                                  | 21.66 | 1 | 4  | 5  | 28  | 0.834 | 0.823 | 0.943 | 0.978 | 74.72  | 21.66 | 7  | 28  | 277  | 31.0  | 5.83 |
| P61981 | 14-3-3 protein<br>gamma<br>OS=Homo<br>sapiens<br>GN=YWHAG<br>PE=1 SV=2 -<br>[1433G_HUMAN<br>]                                                                                | 73.28 | 2 | 11 | 17 | 310 | 1.276 | 0.987 | 1.082 | 0.979 | 837.60 | 73.28 | 27 | 310 | 247  | 28.3  | 4.89 |

|        |                                                                                                                     |       |   |    |    |     |       |       |       |       |        |       |    |     |     |      |      |
|--------|---------------------------------------------------------------------------------------------------------------------|-------|---|----|----|-----|-------|-------|-------|-------|--------|-------|----|-----|-----|------|------|
| Q8N1G4 | Leucine-rich repeat-containing protein 47<br>OS=Homo sapiens<br>GN=LRRC47<br>PE=1 SV=1 - [LRC47_HUMAN]              | 24.87 | 1 | 14 | 14 | 69  | 0.918 | 0.987 | 1.123 | 0.979 | 166.51 | 24.87 | 26 | 69  | 583 | 63.4 | 8.28 |
| Q9UNI6 | Dual specificity protein phosphatase 12<br>OS=Homo sapiens<br>GN=DUSP12<br>PE=1 SV=1 - [DUS12_HUMAN]                | 6.18  | 1 | 2  | 2  | 3   | 0.914 | 1.076 | 1.206 | 0.979 | 2.12   | 6.18  | 2  | 3   | 340 | 37.7 | 6.84 |
| P30048 | Thioredoxin-dependent peroxide reductase, mitochondrial<br>OS=Homo sapiens<br>GN=PRDX3<br>PE=1 SV=3 - [PRDX3_HUMAN] | 32.03 | 1 | 11 | 11 | 124 | 1.038 | 1.155 | 0.858 | 0.979 | 288.35 | 32.03 | 20 | 124 | 256 | 27.7 | 7.78 |
| P16591 | Tyrosine-protein kinase Fer<br>OS=Homo sapiens<br>GN=FER PE=1 SV=2 - [FER_HUMAN]                                    | 5.84  | 1 | 4  | 5  | 6   | 1.102 | 0.917 | 1.220 | 0.979 | 13.40  | 5.84  | 6  | 6   | 822 | 94.6 | 7.14 |
| Q04760 | Lactoylglutathione lyase<br>OS=Homo sapiens<br>GN=GLO1<br>PE=1 SV=4 - [LGUL_HUMAN]                                  | 37.50 | 1 | 7  | 7  | 28  | 1.148 | 0.946 | 0.910 | 0.979 | 80.04  | 37.50 | 11 | 28  | 184 | 20.8 | 5.31 |
| Q8NCA5 | Protein FAM98A<br>OS=Homo sapiens<br>GN=FAM98A<br>PE=1 SV=1 - [FA98A_HUMAN]                                         | 26.40 | 1 | 10 | 13 | 50  | 0.867 | 1.002 | 1.059 | 0.979 | 146.69 | 26.40 | 22 | 50  | 519 | 55.4 | 9.03 |
| Q6UUV9 | CREB-regulated transcription coactivator 1<br>OS=Homo sapiens<br>GN=CRTC1<br>PE=1 SV=2 - [CRTC1_HUMAN]              | 1.58  | 1 | 1  | 1  | 3   | 0.864 | 1.459 | 1.315 | 0.979 | 8.01   | 1.58  | 2  | 3   | 634 | 67.3 | 6.05 |
| P62906 | 60S ribosomal protein L10a<br>OS=Homo sapiens<br>GN=RPL10A<br>PE=1 SV=2 - [RL10A_HUMAN]                             | 45.62 | 1 | 13 | 13 | 203 | 0.768 | 1.019 | 0.894 | 0.979 | 426.86 | 45.62 | 21 | 203 | 217 | 24.8 | 9.94 |
| P56589 | Peroxisomal biogenesis factor 3<br>OS=Homo sapiens<br>GN=PEX3<br>PE=1 SV=1 - [PEX3_HUMAN]                           | 2.68  | 1 | 1  | 1  | 4   | 1.228 | 0.753 | 0.933 | 0.979 | 8.62   | 2.68  | 2  | 4   | 373 | 42.1 | 8.15 |

|        |                                                                                                                 |       |   |    |    |     |       |       |       |       |        |       |    |     |      |       |       |
|--------|-----------------------------------------------------------------------------------------------------------------|-------|---|----|----|-----|-------|-------|-------|-------|--------|-------|----|-----|------|-------|-------|
| Q86VN1 | Vacuolar protein-sorting-associated protein 36<br>OS=Homo sapiens<br>GN=VPS36<br>PE=1 SV=1 - [VPS36_HUMAN]      | 12.18 | 1 | 4  | 5  | 11  | 1.057 | 0.835 | 0.913 | 0.979 | 25.64  | 12.18 | 8  | 11  | 386  | 43.8  | 7.20  |
| Q8WXA9 | Splicing regulatory glutamine/lysine-rich protein 1<br>OS=Homo sapiens<br>GN=SREK1<br>PE=1 SV=1 - [SREK1_HUMAN] | 8.27  | 1 | 3  | 3  | 8   | 1.059 | 1.102 | 1.094 | 0.979 | 20.85  | 8.27  | 4  | 8   | 508  | 59.3  | 10.39 |
| P19474 | E3 ubiquitin-protein ligase TRIM21<br>OS=Homo sapiens<br>GN=TRIM21<br>PE=1 SV=1 - [ROS2_HUMAN]                  | 22.95 | 1 | 11 | 11 | 42  | 1.669 | 1.079 | 1.348 | 0.980 | 98.11  | 22.95 | 19 | 42  | 475  | 54.1  | 6.38  |
| P31948 | Stress-induced-phosphoprotein 1<br>OS=Homo sapiens<br>GN=STIP1<br>PE=1 SV=1 - [STIP1_HUMAN]                     | 68.88 | 1 | 52 | 52 | 294 | 0.923 | 1.100 | 1.019 | 0.980 | 663.48 | 68.88 | 76 | 294 | 543  | 62.6  | 6.80  |
| Q96NW7 | Leucine-rich repeat-containing protein 7<br>OS=Homo sapiens<br>GN=LRRC7<br>PE=1 SV=1 - [LRRC7_HUMAN]            | 2.02  | 1 | 1  | 3  | 8   | 0.823 | 0.812 | 0.838 | 0.980 | 9.88   | 2.02  | 4  | 8   | 1537 | 172.5 | 6.81  |
| O60268 | Uncharacterized protein KIAA0513<br>OS=Homo sapiens<br>GN=KIAA0513<br>PE=2 SV=1 - [K0513_HUMAN]                 | 5.60  | 1 | 2  | 2  | 3   | 1.098 | 0.977 | 1.532 | 0.980 | 9.75   | 5.60  | 2  | 3   | 411  | 46.6  | 5.06  |
| O95210 | Starch-binding domain-containing protein 1<br>OS=Homo sapiens<br>GN=STBD1<br>PE=1 SV=1 - [STBD1_HUMAN]          | 20.11 | 1 | 6  | 6  | 21  | 1.054 | 0.767 | 0.847 | 0.980 | 60.93  | 20.11 | 10 | 21  | 358  | 39.0  | 5.73  |
| P49368 | T-complex protein 1 subunit gamma<br>OS=Homo sapiens<br>GN=CCT3<br>PE=1 SV=4 - [TCPG_HUMAN]                     | 62.39 | 1 | 36 | 37 | 266 | 1.017 | 1.066 | 0.995 | 0.980 | 564.85 | 62.39 | 61 | 266 | 545  | 60.5  | 6.49  |

|        |                                                                                                             |       |   |    |    |     |       |       |       |       |        |       |    |     |      |       |      |
|--------|-------------------------------------------------------------------------------------------------------------|-------|---|----|----|-----|-------|-------|-------|-------|--------|-------|----|-----|------|-------|------|
| Q9H871 | Protein RMD5 homolog A<br>OS=Homo sapiens<br>GN=RMND5A<br>PE=1 SV=1 - [RMND5A_HUMAN]                        | 6.39  | 2 | 2  | 2  | 2   | 1.542 | 1.026 | 0.836 | 0.980 | 3.00   | 6.39  | 2  | 2   | 391  | 44.0  | 6.06 |
| Q6B0B8 | Tigger transposable element-derived protein<br>3 OS=Homo sapiens<br>GN=TIIGD3<br>PE=1 SV=1 - [TIIGD3_HUMAN] | 1.70  | 1 | 1  | 1  | 1   | 0.923 | 0.757 | 0.743 | 0.980 | 2.30   | 1.70  | 1  | 1   | 471  | 52.0  | 7.40 |
| O95208 | Epsin-2<br>OS=Homo sapiens<br>GN=EPN2<br>PE=1 SV=3 - [EPN2_HUMAN]                                           | 13.10 | 1 | 7  | 7  | 16  | 1.134 | 0.851 | 0.780 | 0.980 | 35.69  | 13.10 | 9  | 16  | 641  | 68.4  | 7.52 |
| Q9HCK1 | DBF4-type zinc finger-containing protein 2<br>OS=Homo sapiens<br>GN=ZDBF2<br>PE=1 SV=3 - [ZDBF2_HUMAN]      | 1.15  | 1 | 2  | 3  | 5   | 1.044 | 0.975 | 1.609 | 0.980 | 4.98   | 1.15  | 3  | 5   | 2354 | 265.5 | 6.16 |
| P27824 | Calnexin<br>OS=Homo sapiens<br>GN=CANX<br>PE=1 SV=2 - [CALX_HUMAN]                                          | 35.64 | 1 | 23 | 25 | 304 | 0.993 | 0.819 | 0.865 | 0.980 | 864.98 | 35.64 | 38 | 304 | 592  | 67.5  | 4.60 |
| Q81UA7 | ATP-binding cassette sub-family A member 9<br>OS=Homo sapiens<br>GN=ABCA9<br>PE=1 SV=1 - [ABCA9_HUMAN]      | 2.77  | 1 | 2  | 2  | 2   | 1.829 | 1.200 | 1.254 | 0.980 | 2.46   | 2.77  | 2  | 2   | 1624 | 184.2 | 6.93 |
| O43865 | Putative adenosylhomocysteinase 2<br>OS=Homo sapiens<br>GN=AHCYL1<br>PE=1 SV=2 - [SAHH2_HUMAN]              | 32.08 | 1 | 7  | 21 | 84  | 1.074 | 0.868 | 0.861 | 0.980 | 189.40 | 32.08 | 37 | 84  | 530  | 58.9  | 6.89 |
| Q81WJ2 | GRIP and coiled-coil domain-containing protein 2<br>OS=Homo sapiens<br>GN=GCC2<br>PE=1 SV=4 - [GCC2_HUMAN]  | 15.20 | 4 | 22 | 28 | 114 | 0.713 | 0.926 | 0.958 | 0.980 | 260.18 | 15.20 | 43 | 114 | 1684 | 195.8 | 5.14 |
| P51149 | Ras-related protein Rab-7a<br>OS=Homo sapiens<br>GN=RAB7A<br>PE=1 SV=1 - [RAB7A_HUMAN]                      | 76.81 | 1 | 16 | 16 | 126 | 1.021 | 0.815 | 0.921 | 0.980 | 245.68 | 76.81 | 26 | 126 | 207  | 23.5  | 6.70 |

|        |                                                                                                                                                               |       |   |    |    |    |       |       |       |       |        |       |    |    |     |      |      |
|--------|---------------------------------------------------------------------------------------------------------------------------------------------------------------|-------|---|----|----|----|-------|-------|-------|-------|--------|-------|----|----|-----|------|------|
| Q9H3Y8 | Pancreatic progenitor cell differentiation and proliferation factor<br>OS=Homo sapiens<br>GN=PPDPF<br>PE=2 SV=1 - [PPDPF_HUMAN]<br>UPF0488 protein<br>C8orf33 | 14.04 | 1 | 1  | 1  | 4  | 0.968 | 3.197 | 1.527 | 0.980 | 5.56   | 14.04 | 2  | 4  | 114 | 11.8 | 7.42 |
| Q9H7E9 | OS=Homo sapiens<br>GN=C8orf33<br>PE=1 SV=1 - [CH033_HUMAN]<br>ATP-sensitive inward rectifier potassium channel 1                                              | 18.34 | 1 | 4  | 4  | 9  | 1.189 | 1.026 | 1.281 | 0.980 | 15.63  | 18.34 | 6  | 9  | 229 | 25.0 | 9.95 |
| P48048 | OS=Homo sapiens<br>GN=KCNJ1<br>PE=1 SV=1 - [KCNJ1_HUMAN]<br>Pantothenate kinase 4                                                                             | 1.53  | 1 | 1  | 1  | 1  | 1.405 | 0.803 | 0.598 | 0.981 | 1.96   | 1.53  | 1  | 1  | 391 | 44.8 | 8.82 |
| Q9NVE7 | OS=Homo sapiens<br>GN=PANK4<br>PE=1 SV=1 - [PANK4_HUMAN]<br>NADH dehydrogenase [ubiquinone] flavoprotein 1, mitochondrial                                     | 21.22 | 1 | 14 | 14 | 38 | 1.128 | 0.904 | 1.066 | 0.981 | 73.87  | 21.22 | 22 | 38 | 773 | 85.9 | 6.28 |
| P49821 | OS=Homo sapiens<br>GN=NDUFV1<br>PE=1 SV=4 - [NDUV1_HUMAN]<br>Lymphocyte function-associated antigen 3                                                         | 27.80 | 1 | 12 | 12 | 43 | 0.660 | 0.985 | 0.701 | 0.981 | 102.10 | 27.80 | 21 | 43 | 464 | 50.8 | 8.21 |
| P19256 | OS=Homo sapiens<br>GN=CD58<br>PE=1 SV=1 - [LFA3_HUMAN]<br>8-oxo-dGDP phosphatase<br>NUDT18                                                                    | 4.00  | 1 | 1  | 1  | 3  | 0.796 | 0.966 | 1.019 | 0.981 | 5.57   | 4.00  | 2  | 3  | 250 | 28.1 | 6.76 |
| Q6ZVK8 | OS=Homo sapiens<br>GN=NUDT18<br>PE=1 SV=3 - [NUD18_HUMAN]<br>14 kDa phosphohistidine phosphatase                                                              | 9.91  | 1 | 3  | 3  | 5  | 0.610 | 0.927 | 0.834 | 0.981 | 13.65  | 9.91  | 4  | 5  | 323 | 35.5 | 6.23 |
| Q9NRX4 | OS=Homo sapiens<br>GN=PHPT1<br>PE=1 SV=1 - [PHP14_HUMAN]<br>]                                                                                                 | 52.80 | 1 | 6  | 6  | 30 | 1.219 | 1.276 | 1.113 | 0.981 | 100.51 | 52.80 | 8  | 30 | 125 | 13.8 | 6.07 |



|        |                                                                                                                                                                  |       |   |    |    |    |       |       |       |       |        |       |    |    |      |       |      |
|--------|------------------------------------------------------------------------------------------------------------------------------------------------------------------|-------|---|----|----|----|-------|-------|-------|-------|--------|-------|----|----|------|-------|------|
| Q14624 | Inter-alpha-trypsin inhibitor heavy chain H4<br>OS=Homo sapiens<br>GN=ITIH4<br>PE=1 SV=4 - [ITIH4_HUMAN]                                                         | 1.94  | 1 | 2  | 2  | 5  | 0.494 | 0.975 | 0.656 | 0.982 | 8.18   | 1.94  | 4  | 5  | 930  | 103.3 | 6.98 |
| P21964 | Catechol O-methyltransferase<br>OS=Homo sapiens<br>GN=COMT<br>PE=1 SV=2 - [COMT_HUMAN]                                                                           | 45.39 | 1 | 12 | 12 | 98 | 1.298 | 0.814 | 0.776 | 0.982 | 315.43 | 45.39 | 18 | 98 | 271  | 30.0  | 5.47 |
| Q15139 | Serine/threonine-protein kinase D1<br>OS=Homo sapiens<br>GN=PRKD1<br>PE=1 SV=2 - [KPCD1_HUMAN]                                                                   | 8.88  | 2 | 5  | 7  | 15 | 0.900 | 0.728 | 0.966 | 0.982 | 22.52  | 8.88  | 10 | 15 | 912  | 101.6 | 6.62 |
| P11182 | Lipoamide acyltransferase component of branched-chain alpha-keto acid dehydrogenase complex, mitochondrial<br>OS=Homo sapiens<br>GN=DBT PE=1 SV=3 - [ODB2_HUMAN] | 13.90 | 1 | 7  | 7  | 21 | 1.054 | 1.156 | 1.020 | 0.982 | 31.66  | 13.90 | 10 | 21 | 482  | 53.5  | 8.51 |
| Q7Z2E3 | Aprataxin<br>OS=Homo sapiens<br>GN=APTX<br>PE=1 SV=2 - [APTX_HUMAN]                                                                                              | 2.25  | 1 | 1  | 1  | 2  | 1.892 | 1.441 | 1.081 | 0.982 | 0.00   | 2.25  | 1  | 2  | 356  | 40.7  | 9.17 |
| Q15645 | Pachytene checkpoint protein 2 homolog<br>OS=Homo sapiens<br>GN=TRIP13<br>PE=1 SV=2 - [PCH2_HUMAN]                                                               | 2.08  | 1 | 1  | 1  | 2  | 1.559 | 1.566 | 0.907 | 0.982 | 1.76   | 2.08  | 2  | 2  | 432  | 48.5  | 6.09 |
| Q9NWT9 | Armadillo repeat-containing protein 1<br>OS=Homo sapiens<br>GN=ARMC1<br>PE=1 SV=1 - [ARMC1_HUMAN]                                                                | 5.67  | 1 | 3  | 3  | 7  | 0.951 | 1.330 | 1.307 | 0.982 | 16.85  | 5.67  | 5  | 7  | 282  | 31.3  | 5.74 |
| P42345 | Serine/threonine-protein kinase mTOR<br>OS=Homo sapiens<br>GN=MTOR<br>PE=1 SV=1 - [MTOR_HUMAN]                                                                   | 7.89  | 1 | 18 | 19 | 36 | 1.046 | 0.929 | 0.862 | 0.983 | 76.03  | 7.89  | 27 | 36 | 2549 | 288.7 | 7.17 |

|        |                                                                                                          |       |    |    |    |     |       |       |       |       |        |       |     |     |      |       |       |
|--------|----------------------------------------------------------------------------------------------------------|-------|----|----|----|-----|-------|-------|-------|-------|--------|-------|-----|-----|------|-------|-------|
| P61247 | 40S ribosomal protein S3a<br>OS=Homo sapiens<br>GN=RPS3A<br>PE=1 SV=2 - [RS3A_HUMAN]                     | 53.03 | 1  | 22 | 22 | 263 | 0.865 | 0.948 | 0.906 | 0.983 | 625.45 | 53.03 | 35  | 263 | 264  | 29.9  | 9.73  |
| Q15935 | Zinc finger protein 77<br>OS=Homo sapiens<br>GN=ZNF77<br>PE=2 SV=2 - [ZNF77_HUMAN]                       | 6.79  | 28 | 1  | 2  | 4   | 1.771 | 1.143 | 1.282 | 0.983 | 2.82   | 6.79  | 2   | 4   | 545  | 61.9  | 8.69  |
| Q9P0M9 | 39S ribosomal protein L27, mitochondrial<br>OS=Homo sapiens<br>GN=MRPL27<br>PE=1 SV=1 - [RM27_HUMAN]     | 31.08 | 1  | 4  | 4  | 17  | 1.043 | 0.745 | 0.875 | 0.983 | 37.18  | 31.08 | 7   | 17  | 148  | 16.1  | 10.42 |
| Q03001 | Dystonin<br>OS=Homo sapiens<br>GN=DST PE=1 SV=4 - [DYST_HUMAN]                                           | 13.22 | 1  | 86 | 91 | 222 | 0.876 | 0.949 | 0.963 | 0.983 | 502.91 | 13.22 | 133 | 222 | 7570 | 860.1 | 5.25  |
| Q9Y376 | Calcium-binding protein 39<br>OS=Homo sapiens<br>GN=CAB39<br>PE=1 SV=1 - [CAB39_HUMAN]                   | 32.55 | 1  | 10 | 11 | 42  | 1.049 | 0.791 | 0.800 | 0.983 | 96.97  | 32.55 | 17  | 42  | 341  | 39.8  | 6.89  |
| Q96PE2 | Rho guanine nucleotide exchange factor 17<br>OS=Homo sapiens<br>GN=ARHGEF17<br>PE=1 SV=1 - [ARHGH_HUMAN] | 8.82  | 1  | 14 | 16 | 26  | 1.099 | 1.293 | 1.295 | 0.983 | 59.34  | 8.82  | 20  | 26  | 2063 | 221.5 | 6.29  |
| Q15018 | BRISC complex subunit Abro1<br>OS=Homo sapiens<br>GN=FAM175B<br>PE=1 SV=2 - [F175B_HUMAN]                | 23.37 | 1  | 8  | 8  | 17  | 1.055 | 0.927 | 0.885 | 0.983 | 38.07  | 23.37 | 10  | 17  | 415  | 46.9  | 6.21  |
| P04181 | Ornithine aminotransferase, mitochondrial<br>OS=Homo sapiens<br>GN=OAT PE=1 SV=1 - [OAT_HUMAN]           | 47.61 | 1  | 17 | 19 | 64  | 0.904 | 0.990 | 1.054 | 0.983 | 164.87 | 47.61 | 28  | 64  | 439  | 48.5  | 7.03  |
| Q7Z401 | C-myc promoter-binding protein<br>OS=Homo sapiens<br>GN=DENND4A<br>PE=1 SV=2 - [MYCPP_HUMAN]             | 3.06  | 1  | 5  | 5  | 7   | 1.210 | 0.890 | 0.861 | 0.983 | 11.55  | 3.06  | 6   | 7   | 1863 | 209.1 | 7.31  |

|        |                                                                                                                  |       |   |    |    |    |       |       |       |       |        |       |    |    |     |      |       |
|--------|------------------------------------------------------------------------------------------------------------------|-------|---|----|----|----|-------|-------|-------|-------|--------|-------|----|----|-----|------|-------|
| Q16543 | Hsp90 co-chaperone<br>Cdc37<br>OS=Homo sapiens<br>GN=CDC37<br>PE=1 SV=1 - [CDC37_HUMAN]                          | 44.71 | 1 | 18 | 18 | 98 | 0.851 | 1.109 | 1.285 | 0.984 | 221.24 | 44.71 | 30 | 98 | 378 | 44.4 | 5.25  |
| Q5VZE5 | N-alpha-acetyltransferase 35, NatC auxiliary subunit<br>OS=Homo sapiens<br>GN=NAA35<br>PE=1 SV=1 - [NAA35_HUMAN] | 16.97 | 1 | 11 | 11 | 25 | 0.746 | 0.963 | 1.055 | 0.984 | 61.64  | 16.97 | 18 | 25 | 725 | 83.6 | 7.05  |
| Q9NVM4 | Protein arginine N-methyltransferase 7<br>OS=Homo sapiens<br>GN=PRMT7<br>PE=1 SV=1 - [ANM7_HUMAN]                | 2.75  | 1 | 1  | 2  | 2  | 0.961 | 0.997 | 0.732 | 0.984 | 4.95   | 2.75  | 2  | 2  | 692 | 78.4 | 5.57  |
| Q9C0I1 | Myotubularin-related protein 12<br>OS=Homo sapiens<br>GN=MTMR12<br>PE=1 SV=2 - [MTMRC_HUMAN]                     | 8.43  | 1 | 5  | 5  | 7  | 1.087 | 1.188 | 1.201 | 0.984 | 10.82  | 8.43  | 5  | 7  | 747 | 86.1 | 6.62  |
| Q8NGR3 | Olfactory receptor 1K1<br>OS=Homo sapiens<br>GN=OR1K1<br>PE=1 SV=1 - [OR1K1_HUMAN]                               | 2.22  | 1 | 1  | 1  | 1  | 1.151 | 0.882 | 0.914 | 0.984 | 1.93   | 2.22  | 1  | 1  | 316 | 34.2 | 7.93  |
| Q9NUY8 | TBC1 domain family member 23<br>OS=Homo sapiens<br>GN=TBC1D23<br>PE=1 SV=3 - [TBC23_HUMAN]                       | 5.72  | 1 | 4  | 4  | 12 | 0.816 | 0.720 | 0.858 | 0.984 | 23.66  | 5.72  | 6  | 12 | 699 | 78.3 | 5.41  |
| P83731 | 60S ribosomal protein L24<br>OS=Homo sapiens<br>GN=RPL24<br>PE=1 SV=1 - [RL24_HUMAN]                             | 49.68 | 1 | 11 | 11 | 85 | 0.801 | 0.803 | 0.860 | 0.984 | 204.87 | 49.68 | 16 | 85 | 157 | 17.8 | 11.25 |
| P53667 | LIM domain kinase 1<br>OS=Homo sapiens<br>GN=LIMK1<br>PE=1 SV=3 - [LIMK1_HUMAN]                                  | 4.79  | 1 | 3  | 3  | 7  | 0.863 | 0.889 | 0.960 | 0.984 | 11.41  | 4.79  | 5  | 7  | 647 | 72.5 | 6.98  |
| O95970 | Leucine-rich glioma-inactivated protein 1<br>OS=Homo sapiens<br>GN=LGI1<br>PE=1 SV=1 - [LGI1_HUMAN]              | 1.62  | 1 | 1  | 1  | 1  | 1.373 | 0.909 | 1.137 | 0.984 | 1.85   | 1.62  | 1  | 1  | 557 | 63.8 | 8.24  |

|        |                                                         |                                                                |       |   |    |    |     |       |       |       |       |        |       |    |     |      |       |      |
|--------|---------------------------------------------------------|----------------------------------------------------------------|-------|---|----|----|-----|-------|-------|-------|-------|--------|-------|----|-----|------|-------|------|
| O60313 | Dynamin-like<br>120 kDa<br>protein,<br>mitochondrial    | OS=Homo sapiens<br>GN=OPA1<br>PE=1 SV=3 -<br>[OPA1_HUMAN]      | 37.71 | 1 | 29 | 29 | 113 | 1.002 | 1.141 | 0.949 | 0.984 | 288.72 | 37.71 | 46 | 113 | 960  | 111.6 | 7.87 |
| Q96F07 | Cytoplasmic<br>FMR1-<br>interacting<br>protein 2        | OS=Homo sapiens<br>GN=CYFIP2<br>PE=1 SV=2 -<br>[CYFP2_HUMAN]   | 10.09 | 1 | 1  | 13 | 43  | 0.792 | 1.109 | 0.826 | 0.984 | 99.11  | 10.09 | 20 | 43  | 1278 | 148.3 | 7.31 |
| Q9UBQ7 | Glyoxylate<br>reductase/hydr<br>oxypruvate<br>reductase | OS=Homo sapiens<br>GN=GRHPR<br>PE=1 SV=1 -<br>[GRHPR_HUMAN]    | 32.32 | 1 | 8  | 8  | 47  | 1.216 | 0.834 | 0.944 | 0.984 | 117.80 | 32.32 | 14 | 47  | 328  | 35.6  | 7.39 |
| Q8IZ52 | Chondroitin<br>sulfate<br>synthase 2                    | OS=Homo sapiens<br>GN=CHPF<br>PE=1 SV=2 -<br>[CHSS2_HUMAN]     | 4.90  | 1 | 3  | 3  | 10  | 0.651 | 0.621 | 1.029 | 0.985 | 28.19  | 4.90  | 6  | 10  | 775  | 85.4  | 6.93 |
| O75431 | Metaxin-2                                               | OS=Homo sapiens<br>GN=MTX2<br>PE=1 SV=1 -<br>[MTX2_HUMAN]      | 26.24 | 1 | 5  | 5  | 17  | 1.027 | 0.675 | 0.739 | 0.985 | 50.75  | 26.24 | 8  | 17  | 263  | 29.7  | 6.29 |
| Q9NRY4 | Rho GTPase-<br>activating<br>protein 35                 | OS=Homo sapiens<br>GN=ARHGAP35<br>PE=1 SV=3 -<br>[RHG35_HUMAN] | 8.61  | 1 | 11 | 12 | 25  | 0.993 | 0.817 | 0.995 | 0.985 | 47.08  | 8.61  | 20 | 25  | 1499 | 170.4 | 6.64 |
| Q9H1Z4 | WD repeat-<br>containing<br>protein 13                  | OS=Homo sapiens<br>GN=WDR13<br>PE=1 SV=2 -<br>[WDR13_HUMAN]    | 17.53 | 1 | 7  | 7  | 23  | 0.956 | 1.073 | 1.163 | 0.985 | 58.12  | 17.53 | 10 | 23  | 485  | 53.7  | 9.14 |
| Q13107 | Ubiquitin<br>carboxyl-<br>terminal<br>hydrolase 4       | OS=Homo sapiens<br>GN=USP4<br>PE=1 SV=3 -<br>[UBP4_HUMAN]      | 11.84 | 1 | 7  | 8  | 24  | 1.076 | 1.104 | 1.059 | 0.985 | 71.18  | 11.84 | 12 | 24  | 963  | 108.5 | 5.71 |

|        |                                                                                                                                                                                                                                 |       |   |    |    |     |       |       |       |       |        |       |    |     |      |       |      |
|--------|---------------------------------------------------------------------------------------------------------------------------------------------------------------------------------------------------------------------------------|-------|---|----|----|-----|-------|-------|-------|-------|--------|-------|----|-----|------|-------|------|
| Q9NRP2 | COX assembly<br>mitochondrial<br>protein 2<br>homolog<br>OS=Homo<br>sapiens<br>GN=CMC2<br>PE=1 SV=1 -<br>[COXM2_HUMAN]<br>Cell cycle<br>control protein<br>50A OS=Homo<br>sapiens<br>GN=TMEM30A<br>PE=1 SV=1 -<br>[CCS0A_HUMAN] | 12.66 | 1 | 1  | 1  | 2   | 1.112 | 1.235 | 0.989 | 0.985 | 4.90   | 12.66 | 1  | 2   | 79   | 9.5   | 7.87 |
| Q9NW96 | NADH<br>dehydrogenase<br>[ubiquinone] 1<br>alpha<br>subcomplex<br>subunit 2<br>OS=Homo<br>sapiens<br>GN=NDUFA2<br>PE=1 SV=3 -<br>[NDUA2_HUMAN]                                                                                  | 16.90 | 1 | 7  | 7  | 20  | 1.198 | 0.798 | 0.922 | 0.985 | 44.99  | 16.90 | 11 | 20  | 361  | 40.7  | 8.59 |
| O43678 | E3 ubiquitin-<br>protein ligase<br>Praj-2<br>OS=Homo<br>sapiens<br>GN=PJAZ PE=1<br>SV=4 -<br>[PJAZ_HUMAN]                                                                                                                       | 49.49 | 1 | 5  | 5  | 19  | 0.517 | 0.916 | 0.789 | 0.985 | 36.66  | 49.49 | 9  | 19  | 99   | 10.9  | 9.57 |
| O43164 | Peroxioredoxin-2<br>OS=Homo<br>sapiens<br>GN=PRDX2<br>PE=1 SV=5 -<br>[PRDX2_HUMAN]                                                                                                                                              | 5.79  | 1 | 3  | 3  | 10  | 0.847 | 1.010 | 1.343 | 0.985 | 20.63  | 5.79  | 6  | 10  | 708  | 78.2  | 4.39 |
| P32119 | Probable<br>phospholipid-<br>transporting<br>ATPase VA<br>OS=Homo<br>sapiens<br>GN=ATP10A<br>PE=2 SV=2 -<br>[AT10A_HUMAN]                                                                                                       | 45.96 | 1 | 12 | 13 | 218 | 0.992 | 1.156 | 1.026 | 0.985 | 412.25 | 45.96 | 23 | 218 | 198  | 21.9  | 5.97 |
| O60312 | Transmembran<br>e emp24<br>domain-<br>containing<br>protein 10<br>OS=Homo<br>sapiens<br>GN=TMED10<br>PE=1 SV=2 -<br>[TMEDA_HUMAN]                                                                                               | 1.47  | 1 | 1  | 2  | 3   | 0.997 | 1.395 | 0.913 | 0.986 | 2.56   | 1.47  | 2  | 3   | 1499 | 167.6 | 8.37 |
| P49755 | T-complex<br>protein 1<br>subunit epsilon<br>OS=Homo<br>sapiens<br>GN=CCT5<br>PE=1 SV=1 -<br>[TCPE_HUMAN]                                                                                                                       | 49.32 | 1 | 12 | 12 | 149 | 0.967 | 1.123 | 1.018 | 0.986 | 363.74 | 49.32 | 20 | 149 | 219  | 25.0  | 7.44 |
| P48643 |                                                                                                                                                                                                                                 | 55.27 | 1 | 32 | 33 | 181 | 0.896 | 1.064 | 1.002 | 0.986 | 420.38 | 55.27 | 55 | 181 | 541  | 59.6  | 5.66 |

|        |                                                                                                                |       |   |    |    |     |       |       |       |       |        |       |     |     |      |       |      |
|--------|----------------------------------------------------------------------------------------------------------------|-------|---|----|----|-----|-------|-------|-------|-------|--------|-------|-----|-----|------|-------|------|
| Q15545 | Transcription initiation factor TFIID subunit 7 OS=Homo sapiens GN=TAF7 PE=1 SV=1 - [TAF7_HUMAN]               | 5.44  | 1 | 2  | 2  | 3   | 0.754 | 0.755 | 1.139 | 0.986 | 5.37   | 5.44  | 3   | 3   | 349  | 40.2  | 5.20 |
| Q8N2K1 | Ubiquitin-conjugating enzyme E2 J2 OS=Homo sapiens GN=UBE2J2 PE=1 SV=3 - [UB2J2_HUMAN]                         | 5.79  | 1 | 1  | 1  | 4   | 0.899 | 0.570 | 0.701 | 0.986 | 14.13  | 5.79  | 2   | 4   | 259  | 28.9  | 8.40 |
| Q6ZQQ6 | WD repeat-containing protein 87 OS=Homo sapiens GN=WDR87 PE=1 SV=3 - [WDR87_HUMAN]                             | 1.67  | 1 | 4  | 4  | 4   | 1.062 | 1.005 | 1.289 | 0.986 | 6.94   | 1.67  | 4   | 4   | 2873 | 333.0 | 7.28 |
| Q9P0K7 | Ankyrin OS=Homo sapiens GN=RAI14 PE=1 SV=2 - [RAI14_HUMAN]                                                     | 63.47 | 1 | 66 | 70 | 356 | 1.082 | 0.836 | 1.134 | 0.986 | 870.60 | 63.47 | 112 | 356 | 980  | 110.0 | 6.21 |
| P35251 | Replication factor C subunit 1 OS=Homo sapiens GN=RFC1 PE=1 SV=4 - [RFC1_HUMAN]                                | 1.92  | 1 | 3  | 3  | 8   | 0.975 | 1.294 | 1.074 | 0.986 | 17.42  | 1.92  | 4   | 8   | 1148 | 128.2 | 9.36 |
| Q5J8M3 | ER membrane protein complex subunit 4 OS=Homo sapiens GN=EMC4 PE=1 SV=2 - [EMC4_HUMAN]                         | 22.40 | 1 | 3  | 3  | 10  | 0.965 | 0.909 | 0.873 | 0.986 | 19.72  | 22.40 | 6   | 10  | 183  | 20.1  | 8.62 |
| Q9BV29 | Uncharacterized protein C15orf57 OS=Homo sapiens GN=C15orf57 PE=1 SV=2 - [CO057_HUMAN]                         | 4.86  | 1 | 1  | 1  | 2   | 0.923 | 0.399 | 0.610 | 0.986 | 2.79   | 4.86  | 2   | 2   | 185  | 20.6  | 4.53 |
| P50479 | PDZ and LIM domain protein 4 OS=Homo sapiens GN=PDLIM4 PE=1 SV=2 - [PDLI4_HUMAN]                               | 61.82 | 1 | 15 | 15 | 158 | 0.883 | 1.029 | 1.377 | 0.986 | 317.77 | 61.82 | 28  | 158 | 330  | 35.4  | 7.91 |
| Q96RQ3 | Methylcrotonoyl-CoA carboxylase subunit alpha, mitochondrial OS=Homo sapiens GN=MCCC1 PE=1 SV=3 - [MCCA_HUMAN] | 15.72 | 1 | 8  | 8  | 17  | 0.898 | 1.368 | 1.086 | 0.986 | 52.32  | 15.72 | 11  | 17  | 725  | 80.4  | 7.78 |

|        |                                                                                                                      |       |   |    |    |     |       |       |       |       |        |       |    |     |     |       |      |
|--------|----------------------------------------------------------------------------------------------------------------------|-------|---|----|----|-----|-------|-------|-------|-------|--------|-------|----|-----|-----|-------|------|
| Q13242 | Serine/arginine-rich splicing factor 9<br>OS=Homo sapiens<br>GN=SRSF9<br>PE=1 SV=1 - [SRSF9_HUMAN]                   | 34.84 | 1 | 7  | 7  | 45  | 0.888 | 1.075 | 0.807 | 0.986 | 101.22 | 34.84 | 13 | 45  | 221 | 25.5  | 8.65 |
| P31939 | Bifunctional purine biosynthesis protein PURH<br>OS=Homo sapiens<br>GN=ATIC PE=1 SV=3 - [PUR9_HUMAN]                 | 74.32 | 1 | 32 | 33 | 186 | 1.020 | 0.923 | 0.903 | 0.986 | 517.99 | 74.32 | 54 | 186 | 592 | 64.6  | 6.71 |
| P17987 | T-complex protein 1 subunit alpha<br>OS=Homo sapiens<br>GN=TCP1<br>PE=1 SV=1 - [TCPA_HUMAN]                          | 53.96 | 1 | 27 | 28 | 248 | 0.904 | 0.878 | 0.941 | 0.986 | 601.78 | 53.96 | 47 | 248 | 556 | 60.3  | 6.11 |
| O94985 | Calsyntenin-1<br>OS=Homo sapiens<br>GN=CLSTN1<br>PE=1 SV=1 - [CSTN1_HUMAN]                                           | 1.02  | 1 | 1  | 1  | 2   | 0.850 | 0.880 | 0.970 | 0.987 | 6.33   | 1.02  | 1  | 2   | 981 | 109.7 | 4.91 |
| Q9H0E2 | Toll-interacting protein<br>OS=Homo sapiens<br>GN=TOLLIP<br>PE=1 SV=1 - [TOLLIP_HUMAN]                               | 22.99 | 1 | 6  | 6  | 20  | 1.168 | 1.033 | 0.984 | 0.987 | 38.49  | 22.99 | 10 | 20  | 274 | 30.3  | 5.97 |
| A0PJK1 | Sodium/glucose cotransporter 5<br>OS=Homo sapiens<br>GN=SLC5A10<br>PE=1 SV=2 - [SCSAA_HUMAN]                         | 2.35  | 1 | 1  | 1  | 2   | 0.377 | 0.413 | 0.562 | 0.987 | 0.00   | 2.35  | 1  | 2   | 596 | 64.3  | 7.61 |
| O00186 | Syntaxin-binding protein 3<br>OS=Homo sapiens<br>GN=STXB3<br>PE=1 SV=2 - [STXB3_HUMAN]                               | 33.78 | 1 | 16 | 16 | 65  | 1.285 | 1.044 | 1.051 | 0.987 | 197.22 | 33.78 | 24 | 65  | 592 | 67.7  | 7.80 |
| Q9H1X3 | DnaJ homolog subfamily C member 25<br>OS=Homo sapiens<br>GN=DNAJC25<br>PE=2 SV=1 - [DJC25_HUMAN]                     | 8.61  | 1 | 3  | 3  | 4   | 0.924 | 0.946 | 0.978 | 0.987 | 9.96   | 8.61  | 3  | 4   | 360 | 42.4  | 9.13 |
| Q15434 | RNA-binding motif, single-stranded-interacting protein 2<br>OS=Homo sapiens<br>GN=RBMS2<br>PE=1 SV=1 - [RBMS2_HUMAN] | 18.92 | 1 | 5  | 7  | 26  | 1.622 | 0.995 | 1.133 | 0.987 | 64.34  | 18.92 | 12 | 26  | 407 | 43.9  | 9.07 |

|        |                                                                                                 |       |   |    |    |      |       |       |       |       |         |       |     |      |      |       |      |
|--------|-------------------------------------------------------------------------------------------------|-------|---|----|----|------|-------|-------|-------|-------|---------|-------|-----|------|------|-------|------|
| P29353 | SHC-transforming protein 1<br>OS=Homo sapiens<br>GN=SHC1<br>PE=1 SV=4 - [SHC1_HUMAN]            | 24.01 | 2 | 11 | 11 | 26   | 0.906 | 0.895 | 0.993 | 0.987 | 63.62   | 24.01 | 13  | 26   | 583  | 62.8  | 6.44 |
| Q03154 | Aminoacylase-1<br>OS=Homo sapiens<br>GN=ACY1<br>PE=1 SV=1 - [ACY1_HUMAN]                        | 27.70 | 1 | 10 | 10 | 24   | 0.940 | 0.844 | 0.750 | 0.987 | 73.25   | 27.70 | 16  | 24   | 408  | 45.9  | 6.18 |
| Q14671 | Pumilio homolog 1<br>OS=Homo sapiens<br>GN=PUM1<br>PE=1 SV=3 - [PUM1_HUMAN]                     | 15.85 | 2 | 12 | 16 | 41   | 0.963 | 0.934 | 1.033 | 0.987 | 134.34  | 15.85 | 22  | 41   | 1186 | 126.4 | 6.84 |
| P14625 | Endoplasmin<br>OS=Homo sapiens<br>GN=HSP90B1<br>PE=1 SV=1 - [ENPL_HUMAN]                        | 63.51 | 2 | 63 | 65 | 1360 | 0.814 | 1.030 | 0.939 | 0.987 | 3518.18 | 63.51 | 109 | 1360 | 803  | 92.4  | 4.84 |
| Q96552 | GPI transamidase component PIG-S<br>OS=Homo sapiens<br>GN=PIGS PE=1 SV=3 - [PIGS_HUMAN]         | 17.48 | 1 | 8  | 8  | 26   | 0.894 | 1.003 | 0.913 | 0.987 | 60.30   | 17.48 | 13  | 26   | 555  | 61.6  | 6.49 |
| Q8TCY9 | Up-regulator of cell proliferation<br>OS=Homo sapiens<br>GN=URGCP<br>PE=1 SV=2 - [URGCP_HUMAN]  | 0.97  | 1 | 1  | 1  | 1    | 1.126 | 0.819 | 0.995 | 0.987 | 0.00    | 0.97  | 1   | 1    | 931  | 104.9 | 6.42 |
| Q13049 | E3 ubiquitin-protein ligase TRIM32<br>OS=Homo sapiens<br>GN=TRIM32<br>PE=1 SV=2 - [TRI32_HUMAN] | 13.17 | 1 | 7  | 7  | 21   | 1.047 | 0.780 | 0.963 | 0.987 | 55.21   | 13.17 | 9   | 21   | 653  | 71.9  | 6.98 |
| P49257 | Protein ERGIC-53<br>OS=Homo sapiens<br>GN=LMAN1<br>PE=1 SV=2 - [LMAN1_HUMAN]                    | 44.12 | 1 | 21 | 22 | 158  | 0.897 | 0.879 | 0.791 | 0.988 | 398.24  | 44.12 | 38  | 158  | 510  | 57.5  | 6.77 |
| Q96H20 | Vacuolar-sorting protein SNF8<br>OS=Homo sapiens<br>GN=SNF8<br>PE=1 SV=1 - [SNF8_HUMAN]         | 8.91  | 1 | 2  | 2  | 4    | 1.092 | 1.108 | 0.848 | 0.988 | 15.39   | 8.91  | 3   | 4    | 258  | 28.8  | 6.65 |
| P24534 | Elongation factor 1-beta<br>OS=Homo sapiens<br>GN=EEF1B2<br>PE=1 SV=3 - [EF1B_HUMAN]            | 58.22 | 1 | 11 | 15 | 273  | 0.895 | 0.901 | 0.893 | 0.988 | 886.90  | 58.22 | 23  | 273  | 225  | 24.7  | 4.67 |



|        |                                                                                                      |       |   |    |    |     |       |       |       |       |        |       |    |     |      |       |       |
|--------|------------------------------------------------------------------------------------------------------|-------|---|----|----|-----|-------|-------|-------|-------|--------|-------|----|-----|------|-------|-------|
| P53680 | AP-2 complex subunit sigma<br>OS=Homo sapiens<br>GN=AP2S1<br>PE=1 SV=2 - [AP2S1_HUMAN]               | 27.46 | 1 | 3  | 3  | 13  | 1.536 | 0.828 | 0.697 | 0.988 | 36.03  | 27.46 | 4  | 13  | 142  | 17.0  | 6.18  |
| Q14919 | Dr1-associated corepressor<br>OS=Homo sapiens<br>GN=DRAP1<br>PE=1 SV=3 - [NC2A_HUMAN]                | 20.98 | 1 | 4  | 4  | 10  | 0.733 | 0.728 | 0.795 | 0.988 | 21.53  | 20.98 | 8  | 10  | 205  | 22.3  | 5.17  |
| Q9BZL1 | Ubiquitin-like protein 5<br>OS=Homo sapiens<br>GN=UBL5 PE=1 SV=1 - [UBL5_HUMAN]                      | 27.40 | 1 | 2  | 2  | 13  | 0.871 | 0.892 | 1.258 | 0.988 | 29.36  | 27.40 | 4  | 13  | 73   | 8.5   | 8.44  |
| O43822 | Protein C21orf2<br>OS=Homo sapiens<br>GN=C21orf2<br>PE=1 SV=1 - [CU002_HUMAN]                        | 2.73  | 1 | 1  | 1  | 3   | 0.985 | 1.052 | 1.268 | 0.988 | 3.98   | 2.73  | 2  | 3   | 256  | 28.3  | 7.34  |
| O75157 | TSC22 domain family protein 2<br>OS=Homo sapiens<br>GN=TSC22D2<br>PE=1 SV=3 - [T22D2_HUMAN]          | 6.15  | 1 | 3  | 6  | 21  | 0.911 | 0.847 | 1.097 | 0.988 | 46.63  | 6.15  | 9  | 21  | 780  | 79.2  | 5.02  |
| Q9NR46 | Endophilin-B2<br>OS=Homo sapiens<br>GN=SH3GLB2<br>PE=1 SV=1 - [SHLB2_HUMAN]                          | 29.11 | 1 | 11 | 12 | 37  | 1.137 | 1.344 | 1.471 | 0.988 | 86.14  | 29.11 | 19 | 37  | 395  | 43.9  | 5.99  |
| O15235 | 28S ribosomal protein S12, mitochondrial<br>OS=Homo sapiens<br>GN=MRPS12<br>PE=1 SV=1 - [RT12_HUMAN] | 8.70  | 1 | 2  | 2  | 3   | 1.120 | 1.517 | 0.944 | 0.988 | 2.03   | 8.70  | 2  | 3   | 138  | 15.2  | 10.29 |
| Q9BPW8 | Protein NipSnap homolog 1<br>OS=Homo sapiens<br>GN=NIPSNAP1<br>PE=1 SV=1 - [NIPS1_HUMAN]             | 39.08 | 1 | 9  | 12 | 39  | 1.109 | 1.459 | 1.216 | 0.989 | 64.52  | 39.08 | 17 | 39  | 284  | 33.3  | 9.31  |
| P27348 | 14-3-3 protein theta<br>OS=Homo sapiens<br>GN=YWHAQ<br>PE=1 SV=1 - [1433T_HUMAN]                     | 77.96 | 2 | 17 | 23 | 247 | 1.256 | 1.312 | 1.092 | 0.989 | 777.24 | 77.96 | 36 | 247 | 245  | 27.7  | 4.78  |
| Q5T011 | Protein SZT2<br>OS=Homo sapiens<br>GN=SZT2<br>PE=2 SV=3 - [SZT2_HUMAN]                               | 1.25  | 1 | 3  | 4  | 6   | 1.090 | 1.231 | 1.237 | 0.989 | 15.71  | 1.25  | 4  | 6   | 3432 | 377.8 | 6.27  |

|        |                                                                                                      |       |   |     |     |     |       |       |       |       |         |       |     |     |      |       |      |
|--------|------------------------------------------------------------------------------------------------------|-------|---|-----|-----|-----|-------|-------|-------|-------|---------|-------|-----|-----|------|-------|------|
| Q9NZM1 | Myoferlin<br>OS=Homo sapiens<br>GN=MYOF<br>PE=1 SV=1 - [MYOF_HUMAN]                                  | 56.43 | 1 | 111 | 113 | 997 | 0.852 | 0.933 | 0.994 | 0.989 | 2618.52 | 56.43 | 189 | 997 | 2061 | 234.6 | 6.18 |
| Q14831 | Metabotropic glutamate receptor 7<br>OS=Homo sapiens<br>GN=GRM7<br>PE=1 SV=1 - [GRM7_HUMAN]          | 7.21  | 1 | 3   | 3   | 5   | 0.892 | 0.904 | 0.967 | 0.989 | 1.74    | 7.21  | 3   | 5   | 915  | 102.2 | 7.88 |
| P78368 | Casein kinase I isoform gamma-2<br>OS=Homo sapiens<br>GN=CSNK1G2<br>PE=1 SV=1 - [KC1G2_HUMAN]        | 4.34  | 3 | 2   | 2   | 6   | 1.159 | 0.747 | 0.791 | 0.989 | 9.52    | 4.34  | 4   | 6   | 415  | 47.4  | 9.06 |
| Q9NQ03 | Transcriptional repressor scratch 2<br>OS=Homo sapiens<br>GN=SCRT2<br>PE=2 SV=3 - [SCRT2_HUMAN]      | 10.42 | 1 | 1   | 1   | 1   | 1.196 | 1.989 | 2.370 | 0.989 | 3.53    | 10.42 | 1   | 1   | 307  | 32.6  | 9.22 |
| Q96PU4 | E3 ubiquitin-protein ligase UHRF2<br>OS=Homo sapiens<br>GN=UHRF2<br>PE=1 SV=1 - [UHRF2_HUMAN]        | 4.99  | 1 | 3   | 3   | 8   | 0.958 | 1.155 | 1.054 | 0.989 | 17.63   | 4.99  | 5   | 8   | 802  | 89.9  | 8.21 |
| Q14011 | Cold-inducible RNA-binding protein<br>OS=Homo sapiens<br>GN=CIRBP<br>PE=1 SV=1 - [CIRBP_HUMAN]       | 39.53 | 1 | 7   | 7   | 20  | 1.089 | 1.068 | 1.058 | 0.989 | 54.05   | 39.53 | 11  | 20  | 172  | 18.6  | 9.51 |
| Q9NR48 | Histone-lysine N-methyltransferase ASH1L<br>OS=Homo sapiens<br>GN=ASH1L<br>PE=1 SV=2 - [ASH1L_HUMAN] | 1.01  | 1 | 3   | 4   | 4   | 0.560 | 0.568 | 0.569 | 0.989 | 7.31    | 1.01  | 4   | 4   | 2969 | 332.6 | 9.39 |
| Q9UNN5 | FAS-associated factor 1<br>OS=Homo sapiens<br>GN=FAF1<br>PE=1 SV=2 - [FAF1_HUMAN]                    | 13.08 | 1 | 9   | 9   | 22  | 0.965 | 1.157 | 1.052 | 0.990 | 55.35   | 13.08 | 11  | 22  | 650  | 73.9  | 4.88 |
| Q9Y3B4 | Splicing factor 3B subunit 6<br>OS=Homo sapiens<br>GN=SF3B6<br>PE=1 SV=1 - [SF3B6_HUMAN]             | 28.00 | 1 | 3   | 3   | 7   | 1.031 | 1.593 | 0.963 | 0.990 | 21.99   | 28.00 | 5   | 7   | 125  | 14.6  | 9.38 |

|        |                                                                                                                       |       |   |    |    |     |       |       |       |       |        |       |    |     |      |       |      |
|--------|-----------------------------------------------------------------------------------------------------------------------|-------|---|----|----|-----|-------|-------|-------|-------|--------|-------|----|-----|------|-------|------|
| Q9H4A4 | Aminopeptidase B OS=Homo sapiens<br>GN=RNPEP<br>PE=1 SV=2 - [AMPB_HUMAN]                                              | 43.08 | 1 | 23 | 23 | 166 | 1.061 | 0.891 | 0.926 | 0.990 | 394.91 | 43.08 | 42 | 166 | 650  | 72.5  | 5.74 |
| P62826 | GTP-binding nuclear protein Ran OS=Homo sapiens<br>GN=RAN PE=1 SV=3 - [RAN_HUMAN]                                     | 25.00 | 1 | 9  | 9  | 59  | 1.000 | 1.219 | 0.821 | 0.990 | 156.68 | 25.00 | 14 | 59  | 216  | 24.4  | 7.49 |
| Q9C0B7 | Transport and Golgi organization protein 6 homolog OS=Homo sapiens<br>GN=TANGO6<br>PE=1 SV=2 - [TNG6_HUMAN]           | 4.39  | 1 | 3  | 3  | 3   | 0.912 | 0.516 | 0.837 | 0.990 | 2.20   | 4.39  | 3  | 3   | 1094 | 120.7 | 6.11 |
| P17568 | NADH dehydrogenase [ubiquinone] 1 beta subcomplex subunit 7 OS=Homo sapiens<br>GN=NDUFB7<br>PE=1 SV=4 - [NDUB7_HUMAN] | 62.77 | 1 | 7  | 7  | 26  | 0.692 | 1.022 | 0.723 | 0.990 | 57.52  | 62.77 | 10 | 26  | 137  | 16.4  | 8.92 |
| P06730 | Eukaryotic translation initiation factor 4E OS=Homo sapiens<br>GN=EIF4E<br>PE=1 SV=2 - [IF4E_HUMAN]                   | 23.50 | 1 | 5  | 6  | 20  | 1.106 | 0.987 | 1.000 | 0.990 | 46.59  | 23.50 | 8  | 20  | 217  | 25.1  | 6.15 |
| Q96AH8 | Ras-related protein Rab-7b OS=Homo sapiens<br>GN=RAB7B<br>PE=2 SV=1 - [RAB7B_HUMAN]                                   | 13.57 | 1 | 2  | 2  | 5   | 1.241 | 0.583 | 0.789 | 0.990 | 11.48  | 13.57 | 3  | 5   | 199  | 22.5  | 6.77 |
| Q9H6U8 | Alpha-1,2-mannosyltransferase ALG9 OS=Homo sapiens<br>GN=ALG9 PE=1 SV=2 - [ALG9_HUMAN]                                | 9.17  | 1 | 4  | 4  | 13  | 0.906 | 1.057 | 0.728 | 0.990 | 37.22  | 9.17  | 7  | 13  | 611  | 69.8  | 8.68 |
| Q96JY0 | Protein maelstrom homolog OS=Homo sapiens<br>GN=MAEL<br>PE=1 SV=1 - [MAEL_HUMAN]                                      | 3.23  | 1 | 1  | 1  | 4   | 0.950 | 0.937 | 1.007 | 0.990 | 5.97   | 3.23  | 1  | 4   | 434  | 49.2  | 8.69 |

|        |                                                                                                               |       |   |    |    |     |        |       |       |       |        |       |    |     |     |       |      |
|--------|---------------------------------------------------------------------------------------------------------------|-------|---|----|----|-----|--------|-------|-------|-------|--------|-------|----|-----|-----|-------|------|
| P20591 | Interferon-induced GTP-binding protein Mx1<br>OS=Homo sapiens<br>GN=MX1 PE=1 SV=4 - [MX1_HUMAN]               | 42.90 | 1 | 22 | 25 | 103 | 11.859 | 0.941 | 2.417 | 0.990 | 243.66 | 42.90 | 41 | 103 | 662 | 75.5  | 5.83 |
| Q96AA3 | Protein RFT1 homolog<br>OS=Homo sapiens<br>GN=RFT1 PE=1 SV=1 - [RFT1_HUMAN]                                   | 3.14  | 1 | 2  | 2  | 4   | 0.801  | 0.696 | 0.681 | 0.990 | 2.15   | 3.14  | 4  | 4   | 541 | 60.3  | 8.85 |
| Q9BXJ9 | N-alpha-acetyltransferase 15, NatA auxiliary subunit<br>OS=Homo sapiens<br>GN=NAA15 PE=1 SV=1 - [NAA15_HUMAN] | 30.60 | 1 | 25 | 30 | 102 | 0.885  | 0.842 | 0.902 | 0.990 | 238.41 | 30.60 | 49 | 102 | 866 | 101.2 | 7.42 |
| Q8N4P6 | Leucine-rich repeat-containing protein 71<br>OS=Homo sapiens<br>GN=LRRC71 PE=2 SV=1 - [LRC71_HUMAN]           | 6.26  | 1 | 2  | 3  | 3   | 1.087  | 0.820 | 1.389 | 0.991 | 4.87   | 6.26  | 3  | 3   | 559 | 61.8  | 9.22 |
| P46952 | 3-hydroxyanthranilate 3,4-dioxygenase<br>OS=Homo sapiens<br>GN=HAAO PE=1 SV=2 - [3HAO_HUMAN]                  | 15.03 | 1 | 4  | 5  | 10  | 1.498  | 0.839 | 0.719 | 0.991 | 23.30  | 15.03 | 8  | 10  | 286 | 32.5  | 5.88 |
| Q9Y4Z0 | U6 snRNA-associated Sm-like protein LSM4<br>OS=Homo sapiens<br>GN=LSM4 PE=1 SV=1 - [LSM4_HUMAN]               | 25.18 | 1 | 5  | 5  | 13  | 0.894  | 1.097 | 0.877 | 0.991 | 32.60  | 25.18 | 7  | 13  | 139 | 15.3  | 9.99 |
| Q6ICG6 | Uncharacterized protein KIAA0930<br>OS=Homo sapiens<br>GN=KIAA0930 PE=1 SV=1 - [K0930_HUMAN]                  | 2.97  | 1 | 1  | 1  | 4   | 0.999  | 1.166 | 1.380 | 0.991 | 11.21  | 2.97  | 2  | 4   | 404 | 45.8  | 7.94 |
| Q96C19 | EF-hand domain-containing protein D2<br>OS=Homo sapiens<br>GN=EFHD2 PE=1 SV=1 - [EFHD2_HUMAN]                 | 54.17 | 1 | 16 | 16 | 62  | 0.962  | 1.426 | 1.233 | 0.991 | 153.06 | 54.17 | 28 | 62  | 240 | 26.7  | 5.20 |

|        |                                                                                                                        |       |   |   |   |    |       |       |       |       |       |       |    |    |     |       |      |
|--------|------------------------------------------------------------------------------------------------------------------------|-------|---|---|---|----|-------|-------|-------|-------|-------|-------|----|----|-----|-------|------|
| Q6PCD5 | E3 ubiquitin-protein ligase<br>RFWD3<br>OS=Homo sapiens<br>GN=RFWD3<br>PE=1 SV=3 - [RFWD3_HUMAN]                       | 0.90  | 1 | 1 | 1 | 1  | 1.139 | 0.818 | 1.078 | 0.991 | 3.27  | 0.90  | 1  | 1  | 774 | 85.0  | 6.46 |
| Q4KMQ2 | Anoctamin-6<br>OS=Homo sapiens<br>GN=ANO6<br>PE=1 SV=2 - [ANO6_HUMAN]                                                  | 10.88 | 1 | 9 | 9 | 31 | 0.982 | 0.921 | 1.100 | 0.991 | 69.90 | 10.88 | 15 | 31 | 910 | 106.1 | 7.77 |
| Q9UGV2 | Protein NDRG3<br>OS=Homo sapiens<br>GN=NDRG3<br>PE=1 SV=2 - [NDRG3_HUMAN]                                              | 15.20 | 1 | 4 | 4 | 15 | 1.065 | 1.076 | 1.255 | 0.991 | 44.15 | 15.20 | 7  | 15 | 375 | 41.4  | 5.31 |
| P60983 | Glia maturation factor beta<br>OS=Homo sapiens<br>GN=GMFB<br>PE=1 SV=2 - [GMFB_HUMAN]                                  | 42.96 | 1 | 5 | 6 | 32 | 1.016 | 0.975 | 0.997 | 0.991 | 64.10 | 42.96 | 12 | 32 | 142 | 16.7  | 5.29 |
| Q9H892 | Tetratricopeptide repeat protein 12<br>OS=Homo sapiens<br>GN=TTC12<br>PE=2 SV=2 - [TTC12_HUMAN]                        | 0.99  | 1 | 1 | 1 | 3  | 0.866 | 0.954 | 0.980 | 0.991 | 4.01  | 0.99  | 2  | 3  | 705 | 78.7  | 5.66 |
| Q96ER9 | Coiled-coil domain-containing protein 51<br>OS=Homo sapiens<br>GN=CCDC51<br>PE=1 SV=2 - [CCDC51_HUMAN]                 | 18.98 | 1 | 7 | 7 | 19 | 0.859 | 0.911 | 1.271 | 0.991 | 50.74 | 18.98 | 10 | 19 | 411 | 45.8  | 8.19 |
| O43716 | Glutamyl-tRNA(Gln) amidotransferase subunit C, mitochondrial<br>OS=Homo sapiens<br>GN=GATC<br>PE=2 SV=1 - [GATC_HUMAN] | 8.09  | 1 | 1 | 1 | 2  | 1.647 | 0.885 | 0.602 | 0.992 | 5.54  | 8.09  | 2  | 2  | 136 | 15.1  | 5.05 |
| O00193 | Small adducin protein<br>OS=Homo sapiens<br>GN=SMAP<br>PE=1 SV=1 - [SMAP_HUMAN]                                        | 19.67 | 1 | 5 | 5 | 24 | 1.043 | 1.453 | 0.957 | 0.992 | 83.32 | 19.67 | 7  | 24 | 183 | 20.3  | 4.72 |
| A8MYZ6 | Forkhead box protein O6<br>OS=Homo sapiens<br>GN=FOXO6<br>PE=1 SV=1 - [FOXO6_HUMAN]                                    | 2.44  | 4 | 1 | 1 | 1  | 0.895 | 1.640 | 1.505 | 0.992 | 2.06  | 2.44  | 1  | 1  | 492 | 50.6  | 5.45 |

|        |                                                                                                                               |       |   |    |    |    |       |       |       |       |       |       |    |    |     |      |       |
|--------|-------------------------------------------------------------------------------------------------------------------------------|-------|---|----|----|----|-------|-------|-------|-------|-------|-------|----|----|-----|------|-------|
| Q8N9M1 | Uncharacterized protein<br>C19orf47<br>OS=Homo sapiens<br>GN=C19orf47<br>PE=1 SV=1 - [CS047_HUMAN]                            | 3.32  | 1 | 1  | 1  | 2  | 0.859 | 0.831 | 1.260 | 0.992 | 2.17  | 3.32  | 2  | 2  | 422 | 44.7 | 10.11 |
| Q99595 | Mitochondrial import inner membrane translocase subunit Tim17-A<br>OS=Homo sapiens<br>GN=TIMM17A<br>PE=1 SV=1 - [TI17A_HUMAN] | 4.09  | 1 | 1  | 1  | 2  | 1.081 | 0.772 | 0.756 | 0.992 | 2.04  | 4.09  | 2  | 2  | 171 | 18.0 | 7.87  |
| Q8ND56 | Protein LSM14 homolog A<br>OS=Homo sapiens<br>GN=LSM14A<br>PE=1 SV=3 - [LS14A_HUMAN]                                          | 13.82 | 1 | 5  | 7  | 21 | 1.266 | 0.917 | 0.772 | 0.992 | 33.16 | 13.82 | 8  | 21 | 463 | 50.5 | 9.52  |
| Q7L311 | Armadillo repeat-containing X-linked protein<br>2 OS=Homo sapiens<br>GN=ARMCX2<br>PE=2 SV=1 - [ARMX2_HUMA]                    | 5.38  | 1 | 4  | 4  | 16 | 1.218 | 0.919 | 1.171 | 0.992 | 38.18 | 5.38  | 8  | 16 | 632 | 65.6 | 8.53  |
| P15104 | Glutamine synthetase<br>OS=Homo sapiens<br>GN=GLUL PE=1 SV=4 - [GLNA_HUMAN]                                                   | 13.94 | 1 | 5  | 5  | 16 | 1.614 | 1.081 | 2.387 | 0.992 | 28.46 | 13.94 | 9  | 16 | 373 | 42.0 | 6.89  |
| O96033 | Molybdopterinsynthase sulfur carrier subunit<br>OS=Homo sapiens<br>GN=MOCS2<br>PE=1 SV=1 - [MOC2A_HUMAN]                      | 21.59 | 1 | 2  | 2  | 7  | 1.156 | 0.788 | 1.005 | 0.992 | 13.56 | 21.59 | 3  | 7  | 88  | 9.7  | 4.72  |
| Q8TE77 | Protein phosphatase Slingshot homolog 3<br>OS=Homo sapiens<br>GN=SSH3<br>PE=1 SV=2 - [SSH3_HUMAN]                             | 21.85 | 1 | 10 | 11 | 35 | 1.320 | 1.037 | 1.234 | 0.992 | 83.59 | 21.85 | 17 | 35 | 659 | 73.0 | 5.30  |
| Q6P1X6 | UPF0598 protein C8orf82<br>OS=Homo sapiens<br>GN=C8orf82<br>PE=1 SV=2 - [CH082_HUMAN]                                         | 19.91 | 1 | 3  | 4  | 12 | 1.351 | 1.079 | 0.878 | 0.992 | 23.05 | 19.91 | 6  | 12 | 216 | 23.9 | 9.14  |

|        |                                                                                                                                                  |       |   |    |    |    |       |       |       |       |        |       |    |    |      |       |      |
|--------|--------------------------------------------------------------------------------------------------------------------------------------------------|-------|---|----|----|----|-------|-------|-------|-------|--------|-------|----|----|------|-------|------|
| O43447 | Peptidyl-prolyl<br>cis-trans<br>isomerase H<br>OS=Homo<br>sapiens<br>GN=PPIH PE=1<br>SV=1 -<br>[PPIH_HUMAN]                                      | 37.29 | 1 | 6  | 7  | 72 | 1.034 | 1.170 | 0.852 | 0.992 | 158.41 | 37.29 | 10 | 72 | 177  | 19.2  | 8.07 |
| P46937 | Transcriptional<br>coactivator<br>YAP1<br>OS=Homo<br>sapiens<br>GN=YAP1<br>PE=1 SV=2 -<br>[YAP1_HUMAN]                                           | 29.17 | 1 | 11 | 11 | 62 | 0.925 | 1.298 | 1.262 | 0.992 | 162.51 | 29.17 | 18 | 62 | 504  | 54.4  | 5.17 |
| P98174 | FYVE, RhoGEF<br>and PH domain-<br>containing<br>protein 1<br>OS=Homo<br>sapiens<br>GN=FGD1<br>PE=1 SV=2 -<br>[FGD1_HUMAN]                        | 0.94  | 1 | 1  | 1  | 1  | 1.260 | 0.983 | 0.565 | 0.992 | 1.80   | 0.94  | 1  | 1  | 961  | 106.5 | 6.58 |
| Q68DQ2 | Very large A-<br>kinase anchor<br>protein<br>OS=Homo<br>sapiens<br>GN=CRYBG3<br>PE=1 SV=3 -<br>[CRYBG3_HUMAN<br>]                                | 3.80  | 2 | 9  | 10 | 19 | 1.048 | 0.845 | 0.917 | 0.992 | 30.25  | 3.80  | 11 | 19 | 2970 | 330.4 | 5.20 |
| O00258 | Tail-anchored<br>protein<br>insertion<br>receptor WRB<br>OS=Homo<br>sapiens<br>GN=WRB PE=1<br>SV=2 -<br>[WRB_HUMAN]                              | 4.02  | 1 | 1  | 1  | 2  | 1.097 | 1.129 | 1.251 | 0.992 | 3.90   | 4.02  | 2  | 2  | 174  | 19.8  | 9.67 |
| Q9H2B2 | Synaptotagmin-<br>4 OS=Homo<br>sapiens<br>GN=SYT4<br>PE=1 SV=1 -<br>[SYT4_HUMAN]                                                                 | 2.12  | 1 | 1  | 1  | 1  | 0.875 | 1.094 | 1.087 | 0.992 | 2.88   | 2.12  | 1  | 1  | 425  | 47.9  | 8.53 |
| P61966 | AP-1 complex<br>subunit sigma-<br>1A OS=Homo<br>sapiens<br>GN=AP1S1<br>PE=1 SV=1 -<br>[AP1S1_HUMAN<br>]                                          | 15.82 | 1 | 2  | 2  | 74 | 1.268 | 0.695 | 0.788 | 0.993 | 258.36 | 15.82 | 4  | 74 | 158  | 18.7  | 5.73 |
| Q13438 | Protein OS-9<br>OS=Homo<br>sapiens<br>GN=OS9 PE=1<br>SV=1 -<br>[OS9_HUMAN]                                                                       | 10.94 | 1 | 7  | 7  | 24 | 0.983 | 0.814 | 0.789 | 0.993 | 51.60  | 10.94 | 10 | 24 | 667  | 75.5  | 4.87 |
| Q3ZCQ8 | Mitochondrial<br>import inner<br>membrane<br>translocase<br>subunit TIM50<br>OS=Homo<br>sapiens<br>GN=TIMM50<br>PE=1 SV=2 -<br>[TIM50_HUMAN<br>] | 24.65 | 1 | 8  | 8  | 22 | 1.104 | 0.974 | 1.007 | 0.993 | 44.49  | 24.65 | 12 | 22 | 353  | 39.6  | 8.37 |

|        |                                                                                                                             |       |   |   |   |    |       |       |       |       |        |       |    |    |     |       |       |
|--------|-----------------------------------------------------------------------------------------------------------------------------|-------|---|---|---|----|-------|-------|-------|-------|--------|-------|----|----|-----|-------|-------|
| Q9P0K1 | Disintegrin and metalloproteinase domain-containing protein 22<br>OS=Homo sapiens<br>GN=ADAM22<br>PE=1 SV=1 - [ADA22_HUMAN] | 1.21  | 1 | 1 | 1 | 1  | 0.746 | 0.987 | 0.949 | 0.993 | 2.05   | 1.21  | 1  | 1  | 906 | 100.4 | 7.20  |
| Q13427 | Peptidyl-prolyl cis-trans isomerase G<br>OS=Homo sapiens<br>GN=PPIG PE=1 SV=2 - [PPIG_HUMAN]                                | 11.27 | 1 | 7 | 7 | 16 | 0.982 | 0.953 | 0.689 | 0.993 | 52.93  | 11.27 | 10 | 16 | 754 | 88.6  | 10.29 |
| Q6PIW4 | Fidgetin-like protein 1<br>OS=Homo sapiens<br>GN=FIGL1<br>PE=1 SV=2 - [FIGL1_HUMAN]                                         | 2.08  | 1 | 2 | 2 | 4  | 1.027 | 0.968 | 1.260 | 0.993 | 11.17  | 2.08  | 2  | 4  | 674 | 74.0  | 7.85  |
| Q9GZ1  | N-alpha-acetyltransferase 50<br>OS=Homo sapiens<br>GN=NAA50<br>PE=1 SV=1 - [NAA50_HUMAN]                                    | 38.46 | 1 | 6 | 6 | 26 | 0.941 | 0.759 | 0.744 | 0.993 | 52.34  | 38.46 | 10 | 26 | 169 | 19.4  | 8.81  |
| P51571 | Translocin-associated protein subunit delta<br>OS=Homo sapiens<br>GN=SSR4<br>PE=1 SV=1 - [SSRD_HUMAN]                       | 34.10 | 1 | 5 | 5 | 70 | 0.805 | 0.763 | 0.765 | 0.993 | 165.79 | 34.10 | 9  | 70 | 173 | 19.0  | 6.15  |
| O60220 | Mitochondrial import inner membrane translocase subunit Tim8 A<br>OS=Homo sapiens<br>GN=TIMM8A<br>PE=1 SV=1 - [TIM8A_HUMAN] | 19.59 | 1 | 2 | 2 | 4  | 1.068 | 1.092 | 1.068 | 0.993 | 7.40   | 19.59 | 2  | 4  | 97  | 11.0  | 5.16  |
| Q96E09 | Protein FAM122A<br>OS=Homo sapiens<br>GN=FAM122A<br>PE=1 SV=1 - [F122A_HUMAN]                                               | 3.48  | 1 | 1 | 1 | 1  | 0.977 | 1.439 | 1.046 | 0.993 | 2.73   | 3.48  | 1  | 1  | 287 | 30.5  | 6.79  |
| Q8N5N7 | 39S ribosomal protein L50, mitochondrial<br>OS=Homo sapiens<br>GN=MRPL50<br>PE=1 SV=2 - [RMS0_HUMAN]                        | 31.65 | 1 | 5 | 5 | 12 | 0.852 | 1.199 | 1.167 | 0.993 | 28.52  | 31.65 | 8  | 12 | 158 | 18.3  | 7.88  |



|        |                                                                                                        |       |   |    |    |     |       |       |       |       |        |       |    |     |      |       |      |
|--------|--------------------------------------------------------------------------------------------------------|-------|---|----|----|-----|-------|-------|-------|-------|--------|-------|----|-----|------|-------|------|
| 095810 | Serum deprivation-response protein<br>OS=Homo sapiens<br>GN=SDPR<br>PE=1 SV=3 - [SDPR_HUMAN]           | 31.76 | 1 | 11 | 11 | 114 | 3.415 | 2.279 | 1.743 | 0.993 | 294.65 | 31.76 | 20 | 114 | 425  | 47.1  | 5.21 |
| Q5JVF3 | PCI domain-containing protein 2<br>OS=Homo sapiens<br>GN=PCID2<br>PE=1 SV=2 - [PCID2_HUMAN]            | 5.76  | 1 | 2  | 2  | 9   | 0.918 | 1.193 | 1.143 | 0.994 | 14.65  | 5.76  | 4  | 9   | 399  | 46.0  | 8.53 |
| Q567U6 | Coiled-coil domain-containing protein 93<br>OS=Homo sapiens<br>GN=CCDC93<br>PE=1 SV=2 - [CCDC93_HUMAN] | 20.44 | 1 | 14 | 15 | 34  | 1.066 | 1.021 | 1.078 | 0.994 | 77.07  | 20.44 | 21 | 34  | 631  | 73.2  | 8.15 |
| O00165 | HCLS1-associated protein X-1<br>OS=Homo sapiens<br>GN=HAX1<br>PE=1 SV=2 - [HAX1_HUMAN]                 | 23.30 | 1 | 4  | 4  | 9   | 0.936 | 1.081 | 0.948 | 0.994 | 18.03  | 23.30 | 6  | 9   | 279  | 31.6  | 4.92 |
| O75116 | Rho-associated protein kinase 2<br>OS=Homo sapiens<br>GN=ROCK2<br>PE=1 SV=4 - [ROCK2_HUMAN]            | 35.73 | 1 | 45 | 51 | 169 | 1.005 | 1.049 | 1.176 | 0.994 | 397.00 | 35.73 | 77 | 169 | 1388 | 160.8 | 6.02 |
| Q6N021 | Methylcytosine dioxygenase TET2<br>OS=Homo sapiens<br>GN=TET2<br>PE=1 SV=3 - [TET2_HUMAN]              | 0.65  | 1 | 1  | 1  | 1   | 0.964 | 0.731 | 0.962 | 0.994 | 0.00   | 0.65  | 1  | 1   | 2002 | 223.7 | 7.99 |
| Q15742 | NGF1-A-binding protein 2<br>OS=Homo sapiens<br>GN=NAB2<br>PE=1 SV=1 - [NAB2_HUMAN]                     | 2.48  | 1 | 1  | 1  | 3   | 0.792 | 0.980 | 1.122 | 0.994 | 6.12   | 2.48  | 2  | 3   | 525  | 56.6  | 6.96 |
| O15264 | Mitogen-activated protein kinase 13<br>OS=Homo sapiens<br>GN=MAPK13<br>PE=1 SV=1 - [MK13_HUMAN]        | 10.14 | 3 | 3  | 4  | 8   | 0.489 | 0.612 | 0.991 | 0.994 | 15.72  | 10.14 | 6  | 8   | 365  | 42.1  | 8.38 |
| Q9BTX1 | Nudeoporin NDC1<br>OS=Homo sapiens<br>GN=NDC1<br>PE=1 SV=2 - [NDC1_HUMAN]                              | 5.49  | 1 | 3  | 3  | 9   | 1.335 | 1.247 | 0.913 | 0.994 | 13.47  | 5.49  | 6  | 9   | 674  | 76.3  | 9.09 |

|        |                                                                                                                                 |       |   |    |    |     |       |       |       |       |        |       |    |     |     |      |      |
|--------|---------------------------------------------------------------------------------------------------------------------------------|-------|---|----|----|-----|-------|-------|-------|-------|--------|-------|----|-----|-----|------|------|
| Q9NTJ5 | Phosphatidylinositolide phosphatase SAC1<br>OS=Homo sapiens<br>GN=SACM1L<br>PE=1 SV=2 - [SAC1_HUMAN]                            | 16.35 | 1 | 10 | 10 | 48  | 1.012 | 0.871 | 0.751 | 0.994 | 107.11 | 16.35 | 18 | 48  | 587 | 66.9 | 7.12 |
| O15226 | NF-kappa-B-repressing factor<br>OS=Homo sapiens<br>GN=NKRF<br>PE=1 SV=2 - [NKRF_HUMAN]                                          | 6.23  | 1 | 5  | 5  | 20  | 1.061 | 1.087 | 0.997 | 0.995 | 36.36  | 6.23  | 8  | 20  | 690 | 77.6 | 8.79 |
| O60568 | Procollagen-lysine,2-oxoglutarate 5-dioxygenase 3<br>OS=Homo sapiens<br>GN=PLOD3<br>PE=1 SV=1 - [PLOD3_HUMAN]                   | 33.06 | 1 | 18 | 20 | 132 | 0.752 | 0.870 | 1.048 | 0.995 | 333.86 | 33.06 | 37 | 132 | 738 | 84.7 | 6.05 |
| P49848 | Transcription initiation factor TFIID subunit 6<br>OS=Homo sapiens<br>GN=TAF6<br>PE=1 SV=1 - [TAF6_HUMAN]                       | 9.16  | 1 | 4  | 5  | 8   | 0.883 | 1.431 | 1.356 | 0.995 | 15.39  | 9.16  | 6  | 8   | 677 | 72.6 | 8.60 |
| Q9Y3D6 | Mitochondrial fission 1 protein<br>OS=Homo sapiens<br>GN=FIS1 PE=1 SV=2 - [FIS1_HUMAN]                                          | 25.66 | 1 | 4  | 4  | 25  | 0.976 | 1.215 | 1.062 | 0.995 | 31.38  | 25.66 | 6  | 25  | 152 | 16.9 | 8.79 |
| P46108 | Adapter molecule crk<br>OS=Homo sapiens<br>GN=CRK PE=1 SV=2 - [CRK_HUMAN]                                                       | 49.67 | 1 | 13 | 13 | 57  | 1.129 | 1.034 | 1.175 | 0.995 | 148.59 | 49.67 | 24 | 57  | 304 | 33.8 | 5.55 |
| P49593 | Protein phosphatase 1F<br>OS=Homo sapiens<br>GN=PPM1F<br>PE=1 SV=3 - [PPM1F_HUMAN]                                              | 27.53 | 1 | 9  | 9  | 24  | 1.162 | 1.071 | 1.151 | 0.995 | 59.03  | 27.53 | 15 | 24  | 454 | 49.8 | 5.10 |
| P09326 | CD48 antigen<br>OS=Homo sapiens<br>GN=CD48<br>PE=1 SV=2 - [CD48_HUMAN]                                                          | 2.88  | 1 | 1  | 1  | 1   | 2.975 | 0.635 | 1.107 | 0.995 | 0.00   | 2.88  | 1  | 1   | 243 | 27.7 | 8.07 |
| Q7L5L3 | Glycerophosphodiester phosphodiesterase domain-containing protein 3<br>OS=Homo sapiens<br>GN=GDPD3<br>PE=2 SV=3 - [GDPD3_HUMAN] | 2.20  | 1 | 1  | 1  | 33  | 0.771 | 0.804 | 0.754 | 0.995 | 88.94  | 2.20  | 2  | 33  | 318 | 36.6 | 7.97 |

|        |                                                                                                                          |       |   |   |    |    |       |       |       |       |       |       |    |    |      |       |      |
|--------|--------------------------------------------------------------------------------------------------------------------------|-------|---|---|----|----|-------|-------|-------|-------|-------|-------|----|----|------|-------|------|
| O95219 | Sorting nexin-4<br>OS=Homo sapiens<br>GN=SNX4<br>PE=1 SV=1 - [SNX4_HUMAN]                                                | 23.33 | 1 | 8 | 8  | 17 | 1.187 | 0.939 | 1.204 | 0.995 | 33.06 | 23.33 | 11 | 17 | 450  | 51.9  | 5.99 |
| P11908 | Ribose-phosphate pyrophosphokinase 2<br>OS=Homo sapiens<br>GN=PRPS2<br>PE=1 SV=2 - [PRPS2_HUMAN]                         | 21.70 | 1 | 4 | 10 | 43 | 1.025 | 0.839 | 0.773 | 0.995 | 93.73 | 21.70 | 16 | 43 | 318  | 34.7  | 6.61 |
| Q8NFF5 | FAD synthase<br>OS=Homo sapiens<br>GN=FLAD1<br>PE=1 SV=1 - [FAD1_HUMAN]                                                  | 8.35  | 1 | 4 | 4  | 7  | 1.140 | 0.847 | 0.935 | 0.995 | 17.30 | 8.35  | 6  | 7  | 587  | 65.2  | 6.93 |
| O00584 | Ribonuclease T2<br>OS=Homo sapiens<br>GN=RNASET2<br>PE=1 SV=2 - [RNT2_HUMAN]                                             | 29.69 | 1 | 6 | 6  | 13 | 0.894 | 1.342 | 1.011 | 0.995 | 33.89 | 29.69 | 9  | 13 | 256  | 29.5  | 7.08 |
| Q9UPN7 | Serine/threonine-protein phosphatase 6 regulatory subunit 1<br>OS=Homo sapiens<br>GN=PPP6R1<br>PE=1 SV=5 - [PP6R1_HUMAN] | 9.76  | 1 | 4 | 4  | 11 | 0.647 | 0.871 | 0.948 | 0.995 | 26.28 | 9.76  | 5  | 11 | 881  | 96.7  | 4.55 |
| Q9Y496 | Kinesin-like protein KIF3A<br>OS=Homo sapiens<br>GN=KIF3A<br>PE=1 SV=4 - [KIF3A_HUMAN]                                   | 8.44  | 3 | 5 | 6  | 23 | 1.215 | 1.066 | 1.264 | 0.996 | 53.16 | 8.44  | 9  | 23 | 699  | 80.0  | 6.54 |
| Q8IYX0 | Zinc finger protein 679<br>OS=Homo sapiens<br>GN=ZNF679<br>PE=2 SV=2 - [ZNF679_HUMAN]                                    | 2.92  | 1 | 1 | 1  | 1  | 0.651 | 1.050 | 0.672 | 0.996 | 0.00  | 2.92  | 1  | 1  | 411  | 47.1  | 8.91 |
| Q9H2U1 | ATP-dependent RNA helicase DHX36<br>OS=Homo sapiens<br>GN=DHX36<br>PE=1 SV=2 - [DHX36_HUMAN]                             | 12.90 | 1 | 9 | 11 | 20 | 0.915 | 0.820 | 0.857 | 0.996 | 49.01 | 12.90 | 16 | 20 | 1008 | 114.7 | 7.68 |
| O15069 | NAC-alpha domain-containing protein 1<br>OS=Homo sapiens<br>GN=NACAD<br>PE=1 SV=3 - [NACAD_HUMAN]                        | 2.37  | 1 | 3 | 3  | 8  | 1.404 | 1.758 | 1.699 | 0.996 | 13.11 | 2.37  | 5  | 8  | 1562 | 161.0 | 4.23 |

|        |                                                                                                                           |       |   |    |    |     |       |       |       |       |         |       |    |     |     |       |      |
|--------|---------------------------------------------------------------------------------------------------------------------------|-------|---|----|----|-----|-------|-------|-------|-------|---------|-------|----|-----|-----|-------|------|
| Q9P032 | NADH dehydrogenase [ubiquinone] 1 alpha subcomplex assembly factor 4 OS=Homo sapiens GN=NDUFAF4 PE=1 SV=1 - [NDUF4_HUMAN] | 35.43 | 1 | 7  | 7  | 21  | 0.639 | 0.688 | 0.840 | 0.996 | 51.41   | 35.43 | 9  | 21  | 175 | 20.3  | 8.82 |
| P14550 | Alcohol dehydrogenase [NADP(+)] OS=Homo sapiens GN=AKR1A1 PE=1 SV=3 - [AK1A1_HUMAN]                                       | 40.31 | 1 | 12 | 13 | 68  | 1.165 | 1.087 | 1.081 | 0.996 | 158.25  | 40.31 | 21 | 68  | 325 | 36.5  | 6.79 |
| O95292 | Vesicle-associated membrane protein-associated protein B/C OS=Homo sapiens GN=VAPB PE=1 SV=3 - [VAPB_HUMAN]               | 49.38 | 1 | 12 | 13 | 53  | 1.233 | 1.059 | 0.927 | 0.996 | 99.71   | 49.38 | 20 | 53  | 243 | 27.2  | 7.30 |
| P48200 | Iron-responsive element-binding protein 2 OS=Homo sapiens GN=IREB2 PE=1 SV=3 - [IREB2_HUMAN]                              | 4.26  | 1 | 4  | 4  | 6   | 1.823 | 1.208 | 1.541 | 0.996 | 9.95    | 4.26  | 6  | 6   | 963 | 105.0 | 7.05 |
| Q2NL82 | Pre-rRNA-processing protein TSR1 homolog OS=Homo sapiens GN=TSR1 PE=1 SV=1 - [TSR1_HUMAN]                                 | 8.58  | 1 | 5  | 5  | 12  | 1.078 | 1.083 | 1.583 | 0.996 | 33.18   | 8.58  | 8  | 12  | 804 | 91.8  | 7.42 |
| P30101 | Protein disulfide-isomerase A3 OS=Homo sapiens GN=PDIA3 PE=1 SV=4 - [PDIA3_HUMAN]                                         | 72.28 | 2 | 44 | 44 | 822 | 0.849 | 0.990 | 0.990 | 0.996 | 2218.08 | 72.28 | 74 | 822 | 505 | 56.7  | 6.35 |
| Q14693 | Phosphatidate phosphatase LPIN1 OS=Homo sapiens GN=LPIN1 PE=1 SV=2 - [LPIN1_HUMAN]                                        | 5.28  | 1 | 2  | 4  | 9   | 1.005 | 1.030 | 1.027 | 0.997 | 27.21   | 5.28  | 5  | 9   | 890 | 98.6  | 6.58 |
| Q9H9E3 | Conserved oligomeric Golgi complex subunit 4 OS=Homo sapiens GN=COG4 PE=1 SV=3 - [COG4_HUMAN]                             | 10.70 | 1 | 7  | 9  | 25  | 0.795 | 0.927 | 1.234 | 0.997 | 47.32   | 10.70 | 14 | 25  | 785 | 89.0  | 5.19 |

|        |                                                                                                                                                        |       |   |    |    |     |       |       |       |       |        |       |    |     |     |       |      |
|--------|--------------------------------------------------------------------------------------------------------------------------------------------------------|-------|---|----|----|-----|-------|-------|-------|-------|--------|-------|----|-----|-----|-------|------|
| P27105 | Erythrocyte<br>band 7<br>integral<br>membrane<br>protein<br>OS=Homo<br>sapiens<br>GN=STOM<br>PE=1 SV=3 -<br>[STOM_HUMAN]                               | 54.86 | 2 | 16 | 16 | 152 | 2.200 | 0.622 | 0.738 | 0.997 | 352.26 | 54.86 | 28 | 152 | 288 | 31.7  | 7.88 |
| Q14161 | ARF GTPase-<br>activating<br>protein GIT2<br>OS=Homo<br>sapiens<br>GN=GIT2 PE=1<br>SV=2 -<br>[GIT2_HUMAN]                                              | 21.61 | 1 | 14 | 16 | 51  | 1.126 | 1.024 | 1.091 | 0.997 | 96.93  | 21.61 | 23 | 51  | 759 | 84.5  | 7.23 |
| P25398 | 40S ribosomal<br>protein S12<br>OS=Homo<br>sapiens<br>GN=RPS12<br>PE=1 SV=3 -<br>[RS12_HUMAN]                                                          | 45.45 | 1 | 5  | 5  | 145 | 0.814 | 0.836 | 0.898 | 0.997 | 396.16 | 45.45 | 9  | 145 | 132 | 14.5  | 7.21 |
| Q9UKS6 | Protein kinase<br>C and casein<br>kinase<br>substrate in<br>neurons<br>protein 3<br>OS=Homo<br>sapiens<br>GN=PACSIN3<br>PE=1 SV=2 -<br>[PACSIN3_HUMAN] | 20.99 | 1 | 9  | 9  | 31  | 1.413 | 2.311 | 1.696 | 0.997 | 65.01  | 20.99 | 16 | 31  | 424 | 48.5  | 6.18 |
| P04156 | Major prion<br>protein<br>OS=Homo<br>sapiens<br>GN=PRNP<br>PE=1 SV=1 -<br>[PRIO_HUMAN]                                                                 | 8.70  | 1 | 2  | 2  | 5   | 1.307 | 0.358 | 0.734 | 0.997 | 17.62  | 8.70  | 2  | 5   | 253 | 27.6  | 9.00 |
| O60888 | Protein CutA<br>OS=Homo<br>sapiens<br>GN=CUTA<br>PE=1 SV=2 -<br>[CUTA_HUMAN]                                                                           | 15.64 | 1 | 2  | 2  | 42  | 1.249 | 0.886 | 0.855 | 0.997 | 115.38 | 15.64 | 4  | 42  | 179 | 19.1  | 5.50 |
| O94804 | Serine/threoni<br>ne-protein<br>kinase 10<br>OS=Homo<br>sapiens<br>GN=STK10<br>PE=1 SV=1 -<br>[STK10_HUMAN]                                            | 19.83 | 1 | 17 | 18 | 50  | 1.112 | 0.924 | 1.242 | 0.997 | 112.33 | 19.83 | 24 | 50  | 968 | 112.1 | 6.95 |
| Q9UIL4 | Kinesin-like<br>protein KIF25<br>OS=Homo<br>sapiens<br>GN=KIF25<br>PE=2 SV=2 -<br>[KIF25_HUMAN<br>]                                                    | 4.17  | 1 | 1  | 1  | 1   | 1.665 | 0.956 | 1.174 | 0.997 | 0.00   | 4.17  | 1  | 1   | 384 | 40.7  | 8.31 |
| O60749 | Sorting nexin-2<br>OS=Homo<br>sapiens<br>GN=SNX2<br>PE=1 SV=2 -<br>[SNX2_HUMAN]                                                                        | 49.90 | 1 | 22 | 25 | 76  | 1.115 | 1.018 | 1.038 | 0.997 | 177.90 | 49.90 | 40 | 76  | 519 | 58.4  | 5.12 |

|        |                                                                                                              |       |   |    |    |    |       |       |       |       |        |       |    |    |     |       |      |
|--------|--------------------------------------------------------------------------------------------------------------|-------|---|----|----|----|-------|-------|-------|-------|--------|-------|----|----|-----|-------|------|
| Q6DN90 | IQ motif and SEC7 domain-containing protein 1<br>OS=Homo sapiens<br>GN=IQSEC1<br>PE=1 SV=1 - [IQEC1_HUMAN]   | 6.75  | 1 | 5  | 7  | 13 | 1.012 | 1.066 | 1.106 | 0.997 | 24.49  | 6.75  | 9  | 13 | 963 | 108.2 | 6.93 |
| Q6P1N0 | Coiled-coil and C2 domain-containing protein 1A<br>OS=Homo sapiens<br>GN=CC2D1A<br>PE=1 SV=1 - [C2D1A_HUMAN] | 25.45 | 1 | 22 | 22 | 58 | 0.927 | 1.146 | 1.258 | 0.997 | 115.12 | 25.45 | 34 | 58 | 951 | 104.0 | 8.09 |
| Q9NQR4 | Omega-amidase NIT2<br>OS=Homo sapiens<br>GN=NIT2 PE=1 SV=1 - [NIT2_HUMAN]                                    | 39.86 | 1 | 11 | 11 | 57 | 1.088 | 0.949 | 1.115 | 0.997 | 132.71 | 39.86 | 18 | 57 | 276 | 30.6  | 7.21 |
| P54840 | Glycogen [starch] synthase, liver<br>OS=Homo sapiens<br>GN=GYS2<br>PE=1 SV=2 - [GYS2_HUMAN]                  | 5.97  | 1 | 2  | 4  | 8  | 0.985 | 1.143 | 1.105 | 0.997 | 21.79  | 5.97  | 5  | 8  | 703 | 80.9  | 6.83 |
| Q9BVP2 | Guanine nucleotide-binding protein-like 3<br>OS=Homo sapiens<br>GN=GNL3 PE=1 SV=2 - [GNL3_HUMAN]             | 23.50 | 1 | 10 | 10 | 32 | 0.687 | 0.727 | 0.650 | 0.997 | 77.05  | 23.50 | 14 | 32 | 549 | 62.0  | 9.16 |
| Q13586 | Stromal interaction molecule 1<br>OS=Homo sapiens<br>GN=STIM1<br>PE=1 SV=3 - [STIM1_HUMAN]                   | 28.03 | 1 | 18 | 18 | 57 | 1.080 | 1.004 | 0.929 | 0.997 | 146.04 | 28.03 | 26 | 57 | 685 | 77.4  | 6.67 |
| Q96AG3 | Solute carrier family 25 member 46<br>OS=Homo sapiens<br>GN=SLC25A46<br>PE=1 SV=1 - [S2546_HUMAN]            | 9.57  | 1 | 4  | 4  | 7  | 0.951 | 0.999 | 1.244 | 0.997 | 9.72   | 9.57  | 7  | 7  | 418 | 46.1  | 7.43 |
| Q9UL25 | Ras-related protein Rab-21<br>OS=Homo sapiens<br>GN=RAB21<br>PE=1 SV=3 - [RAB21_HUMAN]                       | 34.22 | 2 | 7  | 7  | 50 | 1.106 | 0.950 | 0.900 | 0.997 | 125.49 | 34.22 | 12 | 50 | 225 | 24.3  | 7.94 |

|        |                                                                                                      |       |   |    |    |    |       |       |       |       |        |       |    |    |     |      |      |
|--------|------------------------------------------------------------------------------------------------------|-------|---|----|----|----|-------|-------|-------|-------|--------|-------|----|----|-----|------|------|
| Q96EL2 | 28S ribosomal protein S24, mitochondrial<br>OS=Homo sapiens<br>GN=MRPS24<br>PE=1 SV=1 - [RT24_HUMAN] | 21.56 | 1 | 3  | 3  | 7  | 0.739 | 1.029 | 0.721 | 0.998 | 10.78  | 21.56 | 5  | 7  | 167 | 19.0 | 9.38 |
| P15927 | Replication protein A 32 kDa subunit<br>OS=Homo sapiens<br>GN=RPA2<br>PE=1 SV=1 - [RFA2_HUMAN]       | 15.56 | 1 | 4  | 4  | 17 | 1.182 | 1.206 | 1.079 | 0.998 | 42.34  | 15.56 | 7  | 17 | 270 | 29.2 | 6.15 |
| Q7Z5G4 | Golgin subfamily A member 7<br>OS=Homo sapiens<br>GN=GOLGA7<br>PE=1 SV=2 - [GOGA7_HUMAN]             | 32.12 | 1 | 4  | 4  | 15 | 1.325 | 0.988 | 0.893 | 0.998 | 36.54  | 32.12 | 7  | 15 | 137 | 15.8 | 7.05 |
| Q98TY7 | Protein HGH1 homolog<br>OS=Homo sapiens<br>GN=HGH1<br>PE=1 SV=1 - [HGH1_HUMAN]                       | 14.10 | 1 | 6  | 6  | 19 | 0.763 | 1.318 | 1.321 | 0.998 | 32.67  | 14.10 | 9  | 19 | 390 | 42.1 | 4.81 |
| Q8WXI9 | Transcriptional repressor p66-beta<br>OS=Homo sapiens<br>GN=GATAD2B<br>PE=1 SV=1 - [P66B_HUMAN]      | 10.12 | 1 | 4  | 5  | 30 | 1.193 | 1.386 | 1.059 | 0.998 | 59.51  | 10.12 | 9  | 30 | 593 | 65.2 | 9.70 |
| Q9Y6F6 | Protein MRV1<br>OS=Homo sapiens<br>GN=MRV1<br>PE=1 SV=2 - [MRV1_HUMAN]                               | 30.62 | 1 | 24 | 25 | 98 | 0.887 | 1.482 | 1.959 | 0.998 | 231.58 | 30.62 | 40 | 98 | 885 | 96.1 | 5.58 |
| P04062 | Glucosylceramidase<br>OS=Homo sapiens<br>GN=GBA PE=1 SV=3 - [GLCM_HUMAN]                             | 19.22 | 1 | 8  | 9  | 40 | 0.958 | 1.172 | 1.003 | 0.998 | 90.81  | 19.22 | 15 | 40 | 536 | 59.7 | 7.61 |
| Q8IV48 | 3'-5' exoribonuclease 1<br>OS=Homo sapiens<br>GN=ERI1 PE=1 SV=3 - [ERI1_HUMAN]                       | 12.32 | 1 | 4  | 4  | 9  | 0.654 | 1.116 | 0.917 | 0.998 | 20.92  | 12.32 | 7  | 9  | 349 | 40.0 | 6.70 |
| Q96FW1 | Ubiquitin thioesterase OTUB1<br>OS=Homo sapiens<br>GN=OTUB1<br>PE=1 SV=2 - [OTUB1_HUMAN]             | 36.90 | 1 | 11 | 11 | 39 | 1.127 | 1.105 | 0.973 | 0.998 | 105.07 | 36.90 | 16 | 39 | 271 | 31.3 | 4.94 |

|        |                                                                                                       |       |    |    |    |     |       |       |       |       |        |       |    |     |      |       |       |
|--------|-------------------------------------------------------------------------------------------------------|-------|----|----|----|-----|-------|-------|-------|-------|--------|-------|----|-----|------|-------|-------|
| Q14108 | Lysosome membrane protein 2<br>OS=Homo sapiens<br>GN=SCARB2<br>PE=1 SV=2 - [SCRB2_HUMAN]              | 27.20 | 1  | 11 | 11 | 101 | 0.914 | 0.705 | 0.556 | 0.998 | 240.32 | 27.20 | 19 | 101 | 478  | 54.3  | 5.14  |
| P38606 | V-type proton ATPase catalytic subunit A<br>OS=Homo sapiens<br>GN=ATP6V1A<br>PE=1 SV=2 - [VATA_HUMAN] | 39.22 | 1  | 24 | 24 | 99  | 1.024 | 0.898 | 1.046 | 0.998 | 245.50 | 39.22 | 36 | 99  | 617  | 68.3  | 5.52  |
| Q15126 | Phosphomevalonate kinase<br>OS=Homo sapiens<br>GN=PMVK<br>PE=1 SV=3 - [PMVK_HUMAN]                    | 51.04 | 1  | 9  | 9  | 21  | 1.192 | 1.393 | 1.510 | 0.999 | 30.45  | 51.04 | 14 | 21  | 192  | 22.0  | 5.73  |
| Q12802 | A-kinase anchor protein 13<br>OS=Homo sapiens<br>GN=AKAP13<br>PE=1 SV=2 - [AKP13_HUMAN]               | 3.48  | 1  | 6  | 9  | 17  | 0.782 | 1.213 | 0.946 | 0.999 | 31.08  | 3.48  | 11 | 17  | 2813 | 307.4 | 5.24  |
| Q5XKK7 | Protein FAM219B<br>OS=Homo sapiens<br>GN=FAM219B<br>PE=1 SV=1 - [F219B_HUMAN]                         | 8.59  | 1  | 1  | 1  | 8   | 1.049 | 0.748 | 1.147 | 0.999 | 20.45  | 8.59  | 2  | 8   | 198  | 21.1  | 8.25  |
| Q9LUJ3 | Zinc finger protein 112<br>OS=Homo sapiens<br>GN=ZNF112<br>PE=2 SV=2 - [ZNF112_HUMAN]                 | 9.97  | 11 | 2  | 4  | 6   | 0.636 | 1.849 | 0.991 | 0.999 | 2.55   | 9.97  | 6  | 6   | 913  | 105.8 | 8.27  |
| Q6P9G9 | Zinc finger protein 449<br>OS=Homo sapiens<br>GN=ZNF449<br>PE=2 SV=3 - [ZNF449_HUMAN]                 | 4.63  | 94 | 1  | 2  | 3   | 0.887 | 0.873 | 1.358 | 0.999 | 2.24   | 4.63  | 2  | 3   | 518  | 59.9  | 7.31  |
| Q9UKG1 | DCC-interacting protein 13-alpha<br>OS=Homo sapiens<br>GN=APPL1<br>PE=1 SV=1 - [DP13A_HUMAN]          | 23.98 | 1  | 17 | 18 | 57  | 0.836 | 1.089 | 1.029 | 0.999 | 134.22 | 23.98 | 28 | 57  | 709  | 79.6  | 5.41  |
| P46781 | 40S ribosomal protein S9<br>OS=Homo sapiens<br>GN=RPS9<br>PE=1 SV=3 - [RS9_HUMAN]                     | 39.18 | 2  | 12 | 13 | 148 | 0.780 | 0.887 | 0.720 | 0.999 | 332.94 | 39.18 | 23 | 148 | 194  | 22.6  | 10.65 |



|        |                                                                                                                                                                                                                                                              |       |   |    |    |     |       |       |       |       |        |       |    |     |     |      |      |
|--------|--------------------------------------------------------------------------------------------------------------------------------------------------------------------------------------------------------------------------------------------------------------|-------|---|----|----|-----|-------|-------|-------|-------|--------|-------|----|-----|-----|------|------|
| Q9Y5U2 | Protein TSSC4<br>OS=Homo<br>sapiens<br>GN=TSSC4<br>PE=1 SV=3 -<br>[TSSC4_HUMAN<br>]<br>CUE domain-<br>containing<br>protein 1<br>OS=Homo<br>sapiens<br>GN=CUEDC1<br>PE=1 SV=1 -<br>[CUED1_HUMAN<br>]<br>Mitochondrial<br>import<br>receptor<br>subunit TOM70 | 10.03 | 1 | 3  | 3  | 8   | 0.940 | 0.956 | 0.841 | 0.999 | 22.46  | 10.03 | 4  | 8   | 329 | 34.3 | 5.19 |
| Q9NWM3 | OS=Homo<br>sapiens<br>GN=CUEDC1<br>PE=1 SV=1 -<br>[CUED1_HUMAN<br>]<br>Mitochondrial<br>import<br>receptor<br>subunit TOM70                                                                                                                                  | 5.18  | 1 | 2  | 2  | 6   | 0.791 | 1.021 | 0.958 | 0.999 | 15.03  | 5.18  | 3  | 6   | 386 | 42.2 | 5.68 |
| O94826 | OS=Homo<br>sapiens<br>GN=TOMM70A<br>PE=1 SV=1 -<br>[TOM70_HUMA<br>]<br>Eukaryotic<br>translation<br>initiation factor<br>3 subunit F                                                                                                                         | 48.36 | 1 | 27 | 27 | 135 | 0.891 | 0.962 | 0.827 | 0.999 | 321.20 | 48.36 | 39 | 135 | 608 | 67.4 | 7.12 |
| O00303 | OS=Homo<br>sapiens<br>GN=EIF3F<br>PE=1 SV=1 -<br>[EIF3F_HUMAN<br>]<br>Trafficking<br>protein particle<br>complex<br>subunit 6B                                                                                                                               | 23.81 | 1 | 8  | 8  | 32  | 0.963 | 1.000 | 1.005 | 0.999 | 76.58  | 23.81 | 13 | 32  | 357 | 37.5 | 5.45 |
| Q86SZ2 | OS=Homo<br>sapiens<br>GN=TRAPPC6B<br>PE=1 SV=1 -<br>[TPC6B_HUMAN<br>]<br>Mitochondrial<br>carnitine/acylca<br>rnitine carrier<br>protein                                                                                                                     | 39.24 | 1 | 8  | 8  | 18  | 1.154 | 1.023 | 0.909 | 0.999 | 43.29  | 39.24 | 11 | 18  | 158 | 18.0 | 8.68 |
| O43772 | OS=Homo<br>sapiens<br>GN=SLC25A20<br>PE=1 SV=1 -<br>[MCAT_HUMAN]                                                                                                                                                                                             | 26.91 | 1 | 9  | 9  | 34  | 1.143 | 0.763 | 0.789 | 0.999 | 64.54  | 26.91 | 17 | 34  | 301 | 32.9 | 9.41 |
| Q9BWT3 | Poly(A)<br>polymerase<br>gamma<br>OS=Homo<br>sapiens<br>GN=PAPOLG<br>PE=1 SV=2 -<br>[PAPOG_HUMA<br>N]<br>Butyrophilin<br>subfamily 2<br>member A1                                                                                                            | 2.99  | 2 | 2  | 3  | 4   | 1.197 | 1.129 | 1.466 | 0.999 | 8.04   | 2.99  | 3  | 4   | 736 | 82.8 | 9.14 |
| Q7KYR7 | OS=Homo<br>sapiens<br>GN=BTN2A1<br>PE=1 SV=3 -<br>[BT2A1_HUMAN<br>]                                                                                                                                                                                          | 10.25 | 1 | 5  | 6  | 10  | 1.279 | 0.756 | 0.976 | 0.999 | 23.98  | 10.25 | 8  | 10  | 527 | 59.6 | 6.48 |

|        |                                                                                                                                                         |       |   |    |    |      |       |       |       |       |         |       |    |      |      |       |      |
|--------|---------------------------------------------------------------------------------------------------------------------------------------------------------|-------|---|----|----|------|-------|-------|-------|-------|---------|-------|----|------|------|-------|------|
| Q5JPH6 | Probable<br>glutamate--<br>tRNA ligase,<br>mitochondrial<br>OS=Homo<br>sapiens<br>GN=EARS2<br>PE=1 SV=2 -<br>[SYEM_HUMAN]                               | 10.71 | 1 | 7  | 7  | 16   | 0.942 | 1.054 | 0.820 | 0.999 | 26.12   | 10.71 | 11 | 16   | 523  | 58.7  | 8.76 |
| P33240 | Cleavage<br>stimulation<br>factor subunit<br>2 OS=Homo<br>sapiens<br>GN=CSTF2<br>PE=1 SV=1 -<br>[CSTF2_HUMAN<br>]                                       | 22.88 | 1 | 4  | 9  | 25   | 1.078 | 1.040 | 1.267 | 1.000 | 46.80   | 22.88 | 13 | 25   | 577  | 60.9  | 6.83 |
| Q92833 | Protein Jumonji<br>OS=Homo<br>sapiens<br>GN=JARID2<br>PE=1 SV=2 -<br>[JARID2_HUMAN<br>]                                                                 | 0.80  | 1 | 1  | 1  | 1    | 2.068 | 0.820 | 1.711 | 1.000 | 1.77    | 0.80  | 1  | 1    | 1246 | 138.6 | 9.38 |
| Q92542 | Nicastrin<br>OS=Homo<br>sapiens<br>GN=NCSTN<br>PE=1 SV=2 -<br>[NICA_HUMAN]                                                                              | 12.27 | 1 | 8  | 8  | 20   | 1.360 | 0.854 | 0.857 | 1.000 | 44.79   | 12.27 | 12 | 20   | 709  | 78.4  | 5.99 |
| P31040 | Succinate<br>dehydrogenase<br>[ubiquinone]<br>flavoprotein<br>subunit,<br>mitochondrial<br>OS=Homo<br>sapiens<br>GN=SDHA<br>PE=1 SV=2 -<br>[SDHA_HUMAN] | 43.37 | 1 | 22 | 22 | 80   | 0.757 | 1.116 | 0.987 | 1.000 | 220.83  | 43.37 | 33 | 80   | 664  | 72.6  | 7.39 |
| P20749 | B-cell<br>lymphoma 3<br>protein<br>OS=Homo<br>sapiens<br>GN=BCL3 PE=1<br>SV=2 -<br>[BCL3_HUMAN]                                                         | 5.51  | 1 | 2  | 2  | 2    | 1.028 | 1.068 | 0.937 | 1.000 | 4.31    | 5.51  | 2  | 2    | 454  | 47.6  | 8.41 |
| P14618 | Pyruvate kinase<br>PKM OS=Homo<br>sapiens<br>GN=PKM PE=1<br>SV=4 -<br>[KPYM_HUMAN]                                                                      | 75.52 | 3 | 45 | 47 | 1875 | 1.298 | 1.175 | 1.060 | 1.000 | 5351.87 | 75.52 | 78 | 1875 | 531  | 57.9  | 7.84 |
| Q96AT9 | Ribulose-<br>phosphate 3-<br>epimerase<br>OS=Homo<br>sapiens<br>GN=RPE PE=1<br>SV=1 -<br>[RPE_HUMAN]                                                    | 25.00 | 2 | 4  | 4  | 12   | 0.913 | 1.038 | 0.974 | 1.000 | 33.11   | 25.00 | 6  | 12   | 228  | 24.9  | 5.58 |
| Q6UWP7 | Lysocardiolipin<br>acyltransferase<br>1 OS=Homo<br>sapiens<br>GN=LCLAT1<br>PE=1 SV=1 -<br>[LCLT1_HUMAN]                                                 | 17.87 | 1 | 7  | 7  | 26   | 0.968 | 0.877 | 0.837 | 1.000 | 65.16   | 17.87 | 12 | 26   | 414  | 48.9  | 8.62 |

|        |                                                                                                                                      |       |   |    |    |     |       |       |       |       |        |       |    |     |     |       |       |
|--------|--------------------------------------------------------------------------------------------------------------------------------------|-------|---|----|----|-----|-------|-------|-------|-------|--------|-------|----|-----|-----|-------|-------|
| Q6N063 | 2-oxoglutarate and iron-dependent oxygenase domain-containing protein 2<br>OS=Homo sapiens<br>GN=OGFOD2<br>PE=2 SV=2 - [OGFD2_HUMAN] | 6.57  | 1 | 2  | 2  | 3   | 1.017 | 1.058 | 0.851 | 1.000 | 11.04  | 6.57  | 2  | 3   | 350 | 39.0  | 5.68  |
| Q15750 | TGF-beta-activated kinase 1 and MAP3K7-binding protein 1<br>OS=Homo sapiens<br>GN=TAB1<br>PE=1 SV=1 - [TAB1_HUMAN]                   | 20.63 | 1 | 7  | 7  | 24  | 0.914 | 1.016 | 1.084 | 1.000 | 64.58  | 20.63 | 11 | 24  | 504 | 54.6  | 5.52  |
| P17812 | CTP synthase 1<br>OS=Homo sapiens<br>GN=CTPS1<br>PE=1 SV=2 - [PYRGL_HUMAN]                                                           | 27.41 | 1 | 16 | 18 | 71  | 0.758 | 0.766 | 0.777 | 1.000 | 177.20 | 27.41 | 29 | 71  | 591 | 66.6  | 6.46  |
| Q96QC0 | Serine/threonine-protein phosphatase 1 regulatory subunit 10<br>OS=Homo sapiens<br>GN=PPP1R10<br>PE=1 SV=1 - [PP1RA_HUMAN]           | 1.81  | 1 | 2  | 2  | 3   | 1.155 | 1.899 | 1.273 | 1.000 | 6.68   | 1.81  | 2  | 3   | 940 | 99.0  | 9.17  |
| P40189 | Interleukin-6 receptor subunit beta<br>OS=Homo sapiens<br>GN=IL6ST<br>PE=1 SV=2 - [IL6RB_HUMAN]                                      | 13.29 | 1 | 10 | 10 | 27  | 0.775 | 0.710 | 0.881 | 1.000 | 73.05  | 13.29 | 17 | 27  | 918 | 103.5 | 5.95  |
| P17900 | Ganglioside GM2 activator<br>OS=Homo sapiens<br>GN=GM2A<br>PE=1 SV=4 - [SAP3_HUMAN]                                                  | 22.80 | 2 | 5  | 5  | 9   | 0.844 | 1.048 | 1.360 | 1.000 | 20.44  | 22.80 | 7  | 9   | 193 | 20.8  | 5.31  |
| P46779 | 60S ribosomal protein L28<br>OS=Homo sapiens<br>GN=RPL28<br>PE=1 SV=3 - [RL28_HUMAN]                                                 | 51.09 | 1 | 10 | 10 | 152 | 0.771 | 0.973 | 0.857 | 1.000 | 299.82 | 51.09 | 19 | 152 | 137 | 15.7  | 12.02 |
| Q9BT78 | COP9 signalosome complex subunit 4<br>OS=Homo sapiens<br>GN=COPS4<br>PE=1 SV=1 - [CSN4_HUMAN]                                        | 63.79 | 1 | 20 | 21 | 68  | 1.011 | 1.112 | 1.071 | 1.000 | 172.41 | 63.79 | 35 | 68  | 406 | 46.2  | 5.83  |

|        |                                                                                                                           |       |   |    |    |     |       |       |       |       |        |       |    |     |      |       |      |
|--------|---------------------------------------------------------------------------------------------------------------------------|-------|---|----|----|-----|-------|-------|-------|-------|--------|-------|----|-----|------|-------|------|
| Q9H5K3 | Protein O-mannose kinase<br>OS=Homo sapiens<br>GN=POMK<br>PE=1 SV=1 - [SG196_HUMAN]                                       | 8.29  | 1 | 2  | 2  | 6   | 1.389 | 0.925 | 1.011 | 1.000 | 20.72  | 8.29  | 3  | 6   | 350  | 40.0  | 6.10 |
| P45880 | Voltage-dependent anion-selective channel protein 2<br>OS=Homo sapiens<br>GN=VDAC2<br>PE=1 SV=2 - [VDAC2_HUMAN]           | 46.60 | 1 | 12 | 13 | 140 | 0.965 | 0.909 | 0.759 | 1.001 | 324.39 | 46.60 | 19 | 140 | 294  | 31.5  | 7.56 |
| Q13443 | Disintegrin and metalloproteinase domain-containing protein 9<br>OS=Homo sapiens<br>GN=ADAM9<br>PE=1 SV=1 - [ADAM9_HUMAN] | 10.74 | 1 | 7  | 7  | 18  | 0.910 | 0.934 | 1.030 | 1.001 | 34.62  | 10.74 | 11 | 18  | 819  | 90.5  | 7.52 |
| C4AMC7 | Putative WAS protein family homolog 3<br>OS=Homo sapiens<br>GN=WASH3P<br>PE=2 SV=2 - [WASH3_HUMAN]                        | 24.62 | 5 | 9  | 9  | 30  | 0.872 | 0.903 | 1.036 | 1.001 | 63.84  | 24.62 | 12 | 30  | 463  | 50.0  | 5.49 |
| Q8TCF1 | AN1-type zinc finger protein 1<br>OS=Homo sapiens<br>GN=ZFAND1<br>PE=1 SV=1 - [ZFAND1_HUMAN]                              | 8.96  | 1 | 2  | 2  | 5   | 1.014 | 0.967 | 1.654 | 1.001 | 14.49  | 8.96  | 3  | 5   | 268  | 30.8  | 7.39 |
| P48553 | Trafficking protein particle complex subunit 10<br>OS=Homo sapiens<br>GN=TRAPPC10<br>PE=1 SV=2 - [TPC10_HUMAN]            | 0.87  | 1 | 1  | 1  | 1   | 0.978 | 0.860 | 1.156 | 1.001 | 0.00   | 0.87  | 1  | 1   | 1259 | 142.1 | 6.04 |
| O00401 | Neural Wiskott-Aldrich syndrome protein<br>OS=Homo sapiens<br>GN=WASL<br>PE=1 SV=2 - [WASL_HUMAN]                         | 11.09 | 1 | 4  | 4  | 18  | 1.091 | 1.161 | 1.157 | 1.001 | 39.02  | 11.09 | 7  | 18  | 505  | 54.8  | 7.93 |
| Q969K3 | E3 ubiquitin-protein ligase RNF34<br>OS=Homo sapiens<br>GN=RNF34<br>PE=1 SV=1 - [RNF34_HUMAN]                             | 4.03  | 1 | 1  | 2  | 2   | 0.814 | 0.850 | 1.561 | 1.001 | 1.72   | 4.03  | 2  | 2   | 372  | 41.6  | 4.96 |

|        |                                                                                                               |       |   |    |    |    |       |       |       |       |        |       |    |    |     |      |       |
|--------|---------------------------------------------------------------------------------------------------------------|-------|---|----|----|----|-------|-------|-------|-------|--------|-------|----|----|-----|------|-------|
| O75356 | Ectonucleoside triphosphate diphosphohydrolase 5<br>OS=Homo sapiens<br>GN=ENTPD5<br>PE=1 SV=1 - [ENTP5_HUMAN] | 5.61  | 1 | 2  | 2  | 3  | 1.048 | 0.939 | 1.015 | 1.002 | 6.14   | 5.61  | 2  | 3  | 428 | 47.5 | 6.33  |
| P61513 | 60S ribosomal protein L37a<br>OS=Homo sapiens<br>GN=RPL37A<br>PE=1 SV=2 - [RL37A_HUMAN]                       | 36.96 | 1 | 5  | 5  | 18 | 1.071 | 0.792 | 0.895 | 1.002 | 40.76  | 36.96 | 7  | 18 | 92  | 10.3 | 10.43 |
| O00461 | Golgi integral membrane protein 4<br>OS=Homo sapiens<br>GN=GOLIM4<br>PE=1 SV=1 - [GOLI4_HUMAN]                | 20.11 | 1 | 13 | 13 | 62 | 0.768 | 0.930 | 0.938 | 1.002 | 168.03 | 20.11 | 25 | 62 | 696 | 81.8 | 4.77  |
| Q6IA69 | Glutamine-dependent NAD(+) synthetase<br>OS=Homo sapiens<br>GN=NADSYN1<br>PE=1 SV=3 - [NADE_HUMAN]            | 7.22  | 1 | 4  | 4  | 16 | 0.994 | 0.797 | 1.126 | 1.002 | 28.23  | 7.22  | 7  | 16 | 706 | 79.2 | 6.44  |
| Q96I76 | G patch domain-containing protein 3<br>OS=Homo sapiens<br>GN=GPATCH3<br>PE=2 SV=1 - [GPTC3_HUMAN]             | 3.62  | 1 | 1  | 2  | 2  | 1.960 | 1.050 | 2.009 | 1.002 | 4.75   | 3.62  | 2  | 2  | 525 | 59.3 | 5.01  |
| Q9H173 | Nucleotide exchange factor SIL1<br>OS=Homo sapiens<br>GN=SIL1 PE=1 SV=1 - [SIL1_HUMAN]                        | 18.44 | 1 | 8  | 8  | 23 | 0.584 | 0.792 | 0.722 | 1.002 | 59.46  | 18.44 | 13 | 23 | 461 | 52.1 | 5.36  |
| Q9NZ43 | Vesicle transport protein USE1<br>OS=Homo sapiens<br>GN=USE1<br>PE=1 SV=2 - [USE1_HUMAN]                      | 14.67 | 1 | 6  | 6  | 13 | 0.831 | 1.031 | 0.958 | 1.002 | 30.52  | 14.67 | 8  | 13 | 259 | 29.4 | 9.07  |
| Q2T9F4 | Integrator complex subunit 4-like protein 2<br>OS=Homo sapiens<br>GN=INTS4L2<br>PE=2 SV=1 - [IN4L2_HUMAN]     | 2.73  | 3 | 1  | 1  | 2  | 0.934 | 0.942 | 0.807 | 1.002 | 6.87   | 2.73  | 1  | 2  | 439 | 48.9 | 6.21  |

|        |                                                                                                            |       |   |    |    |     |       |       |       |       |        |       |    |     |      |       |      |
|--------|------------------------------------------------------------------------------------------------------------|-------|---|----|----|-----|-------|-------|-------|-------|--------|-------|----|-----|------|-------|------|
| Q7Z6J0 | E3 ubiquitin-protein ligase<br>SH3RF1<br>OS=Homo sapiens<br>GN=SH3RF1<br>PE=1 SV=2 - [SH3R1_HUMAN]         | 8.00  | 1 | 2  | 5  | 6   | 2.008 | 2.064 | 2.993 | 1.002 | 10.52  | 8.00  | 6  | 6   | 888  | 93.1  | 8.54 |
| A8K714 | Calcium-activated chloride channel regulator 1<br>OS=Homo sapiens<br>GN=CLCA1<br>PE=1 SV=3 - [CLCA1_HUMAN] | 1.75  | 1 | 1  | 1  | 1   | 1.071 | 1.085 | 1.102 | 1.002 | 0.00   | 1.75  | 1  | 1   | 914  | 100.2 | 6.37 |
| P25786 | Proteasome subunit alpha type-1<br>OS=Homo sapiens<br>GN=PSMA1<br>PE=1 SV=1 - [PSA1_HUMAN]                 | 57.79 | 1 | 13 | 13 | 121 | 1.006 | 1.022 | 0.956 | 1.002 | 332.07 | 57.79 | 23 | 121 | 263  | 29.5  | 6.61 |
| O60831 | PRA1 family protein 2<br>OS=Homo sapiens<br>GN=PRAF2<br>PE=1 SV=1 - [PRAF2_HUMAN]                          | 26.97 | 1 | 5  | 5  | 13  | 0.857 | 0.811 | 0.964 | 1.002 | 26.84  | 26.97 | 9  | 13  | 178  | 19.2  | 9.19 |
| A5YKK6 | CCR4-NOT transcription complex subunit 1<br>OS=Homo sapiens<br>GN=CNOT1<br>PE=1 SV=2 - [CNOT1_HUMAN]       | 9.64  | 1 | 20 | 20 | 59  | 0.933 | 0.975 | 0.775 | 1.002 | 132.13 | 9.64  | 33 | 59  | 2376 | 266.8 | 7.11 |
| Q96PU5 | E3 ubiquitin-protein ligase<br>NEDD4-like<br>OS=Homo sapiens<br>GN=NEDD4L<br>PE=1 SV=2 - [NED4L_HUMAN]     | 4.51  | 1 | 3  | 3  | 23  | 1.157 | 2.131 | 1.235 | 1.002 | 44.76  | 4.51  | 5  | 23  | 975  | 111.9 | 5.82 |
| O75521 | Enoyl-CoA delta isomerase 2, mitochondrial<br>OS=Homo sapiens<br>GN=ECI2 PE=1 SV=4 - [ECI2_HUMAN]          | 40.61 | 1 | 12 | 12 | 34  | 0.721 | 1.052 | 1.117 | 1.002 | 95.88  | 40.61 | 18 | 34  | 394  | 43.6  | 9.00 |
| O75439 | Mitochondrial-processing peptidase subunit beta<br>OS=Homo sapiens<br>GN=PMPCB<br>PE=1 SV=2 - [MPPB_HUMAN] | 38.65 | 1 | 15 | 16 | 57  | 0.899 | 1.228 | 1.054 | 1.002 | 131.27 | 38.65 | 26 | 57  | 489  | 54.3  | 6.83 |

|        |                                                                                                                                          |       |   |    |    |      |       |       |       |       |         |       |     |      |     |       |      |
|--------|------------------------------------------------------------------------------------------------------------------------------------------|-------|---|----|----|------|-------|-------|-------|-------|---------|-------|-----|------|-----|-------|------|
| Q9GZU7 | Carboxy-terminal domain RNA polymerase II polypeptide A small phosphatase 1<br>OS=Homo sapiens<br>GN=CTDSP1<br>PE=1 SV=1 - [CTDS1_HUMAN] | 20.69 | 2 | 4  | 4  | 7    | 1.064 | 0.886 | 2.054 | 1.002 | 25.37   | 20.69 | 4   | 7    | 261 | 29.2  | 6.00 |
| P02545 | Prelamin-A/C<br>OS=Homo sapiens<br>GN=LMNA<br>PE=1 SV=1 - [LMNA_HUMAN]                                                                   | 72.89 | 1 | 66 | 69 | 1963 | 1.081 | 1.488 | 1.400 | 1.003 | 4666.32 | 72.89 | 125 | 1963 | 664 | 74.1  | 7.02 |
| P30740 | Leukocyte elastase inhibitor<br>OS=Homo sapiens<br>GN=SERPINB1<br>PE=1 SV=1 - [ILEU_HUMAN]                                               | 44.59 | 1 | 16 | 16 | 62   | 2.027 | 0.761 | 0.885 | 1.003 | 151.60  | 44.59 | 28  | 62   | 379 | 42.7  | 6.28 |
| P67936 | Tropomyosin alpha-4 chain<br>OS=Homo sapiens<br>GN=TPM4<br>PE=1 SV=3 - [TPM4_HUMAN]                                                      | 83.87 | 2 | 21 | 42 | 1796 | 1.135 | 0.946 | 1.243 | 1.003 | 4443.01 | 83.87 | 70  | 1796 | 248 | 28.5  | 4.69 |
| Q6ZXV5 | Transmembrane and TPR repeat-containing protein 3<br>OS=Homo sapiens<br>GN=TMTC3<br>PE=1 SV=2 - [TMTC3_HUMAN]                            | 21.31 | 1 | 19 | 20 | 64   | 0.909 | 0.839 | 0.903 | 1.003 | 169.38  | 21.31 | 32  | 64   | 915 | 103.9 | 8.87 |
| Q9H0N5 | Pterin-4-alpha-carbinolamine dehydratase 2<br>OS=Homo sapiens<br>GN=PCBD2<br>PE=1 SV=4 - [PHS2_HUMAN]                                    | 24.62 | 1 | 2  | 3  | 16   | 1.215 | 0.676 | 0.868 | 1.003 | 33.29   | 24.62 | 5   | 16   | 130 | 14.4  | 9.11 |
| O76074 | cGMP-specific 3',5'-cyclic phosphodiesterase<br>OS=Homo sapiens<br>GN=PDE5A<br>PE=1 SV=2 - [PDE5A_HUMAN]                                 | 38.51 | 1 | 35 | 35 | 199  | 0.947 | 1.534 | 1.588 | 1.003 | 470.10  | 38.51 | 61  | 199  | 875 | 99.9  | 6.09 |
| Q9HCS7 | Pre-mRNA-splicing factor SYF1<br>OS=Homo sapiens<br>GN=XAB2<br>PE=1 SV=2 - [SYF1_HUMAN]                                                  | 5.03  | 1 | 5  | 5  | 10   | 1.173 | 0.722 | 0.702 | 1.003 | 20.95   | 5.03  | 6   | 10   | 855 | 99.9  | 6.23 |
| P16333 | Cytoplasmic protein NCK1<br>OS=Homo sapiens<br>GN=NCK1<br>PE=1 SV=1 - [NCK1_HUMAN]                                                       | 32.63 | 2 | 12 | 12 | 32   | 1.441 | 0.801 | 1.014 | 1.003 | 84.17   | 32.63 | 18  | 32   | 377 | 42.8  | 6.47 |

|        |                                                                                                                      |       |   |    |    |    |       |       |       |       |        |       |    |    |      |       |      |
|--------|----------------------------------------------------------------------------------------------------------------------|-------|---|----|----|----|-------|-------|-------|-------|--------|-------|----|----|------|-------|------|
| Q8N1F7 | Nuclear pore complex protein Nup93<br>OS=Homo sapiens<br>GN=NUP93<br>PE=1 SV=2 - [NUP93_HUMAN]                       | 37.48 | 1 | 28 | 28 | 96 | 0.974 | 0.906 | 0.831 | 1.003 | 230.61 | 37.48 | 40 | 96 | 819  | 93.4  | 5.72 |
| Q99445 | Glycosyl-phosphatidylinositol-anchored molecule-like protein<br>OS=Homo sapiens<br>GN=GML PE=2<br>SV=1 - [GML_HUMAN] | 6.33  | 1 | 1  | 1  | 1  | 1.025 | 0.533 | 0.932 | 1.003 | 2.29   | 6.33  | 1  | 1  | 158  | 17.7  | 6.48 |
| Q6PGP7 | Tetratricopeptide repeat protein 37<br>OS=Homo sapiens<br>GN=TTC37<br>PE=1 SV=1 - [TTC37_HUMAN]                      | 20.72 | 1 | 28 | 29 | 68 | 0.828 | 0.908 | 1.057 | 1.003 | 167.77 | 20.72 | 46 | 68 | 1564 | 175.4 | 7.53 |
| Q9UMY4 | Sorting nexin-12<br>OS=Homo sapiens<br>GN=SNX12<br>PE=1 SV=3 - [SNX12_HUMAN]                                         | 48.84 | 1 | 10 | 11 | 41 | 1.120 | 0.827 | 1.220 | 1.004 | 113.34 | 48.84 | 17 | 41 | 172  | 19.7  | 7.87 |
| Q9Y3D2 | Methionine-R-sulfoxide reductase B2, mitochondrial<br>OS=Homo sapiens<br>GN=MSRB2<br>PE=2 SV=2 - [MSRB2_HUMAN]       | 57.14 | 1 | 7  | 7  | 33 | 0.940 | 1.360 | 1.225 | 1.004 | 83.96  | 57.14 | 11 | 33 | 182  | 19.5  | 8.63 |
| Q9UGM6 | Tryptophan--tRNA ligase, mitochondrial<br>OS=Homo sapiens<br>GN=WARS2<br>PE=1 SV=1 - [SYWM_HUMAN]                    | 24.44 | 1 | 6  | 6  | 13 | 0.946 | 1.648 | 1.091 | 1.004 | 37.19  | 24.44 | 11 | 13 | 360  | 40.1  | 9.28 |
| Q86TG7 | Retrotransposon-derived protein PEG10<br>OS=Homo sapiens<br>GN=PEG10<br>PE=1 SV=2 - [PEG10_HUMAN]                    | 3.25  | 1 | 1  | 1  | 1  | 1.738 | 3.751 | 1.004 | 2.43  | 3.25   | 3.25  | 1  | 1  | 708  | 80.1  | 6.39 |
| P49768 | Presenilin-1<br>OS=Homo sapiens<br>GN=PSEN1<br>PE=1 SV=1 - [PSNI_HUMAN]                                              | 13.06 | 2 | 3  | 3  | 8  | 1.328 | 0.483 | 0.626 | 1.004 | 24.67  | 13.06 | 5  | 8  | 467  | 52.6  | 5.31 |
| Q9UQN3 | Charged multivesicular body protein 2b<br>OS=Homo sapiens<br>GN=CHMP2B<br>PE=1 SV=1 - [CHM2B_HUMAN]                  | 19.72 | 1 | 5  | 5  | 21 | 0.942 | 0.883 | 1.170 | 1.004 | 47.03  | 19.72 | 8  | 21 | 213  | 23.9  | 8.76 |



|        |                                                                                                         |       |   |    |    |     |       |       |       |       |        |       |    |     |      |       |      |
|--------|---------------------------------------------------------------------------------------------------------|-------|---|----|----|-----|-------|-------|-------|-------|--------|-------|----|-----|------|-------|------|
| Q9Y2Q3 | Glutathione S-transferase kappa 1<br>OS=Homo sapiens<br>GN=GSTK1<br>PE=1 SV=3 - [GSTK1_HUMAN]           | 44.25 | 1 | 9  | 9  | 52  | 1.024 | 1.334 | 1.339 | 1.004 | 133.06 | 44.25 | 15 | 52  | 226  | 25.5  | 8.41 |
| P67809 | Nudease-sensitive element-binding protein 1<br>OS=Homo sapiens<br>GN=YBX1<br>PE=1 SV=3 - [YBOX1_HUMAN]  | 33.95 | 2 | 3  | 9  | 44  | 0.808 | 1.719 | 1.497 | 1.004 | 132.62 | 33.95 | 13 | 44  | 324  | 35.9  | 9.88 |
| Q9UBS4 | DnaJ homolog subfamily B member 11<br>OS=Homo sapiens<br>GN=DNAJB11<br>PE=1 SV=1 - [DJB11_HUMAN]        | 38.27 | 1 | 15 | 15 | 79  | 0.837 | 0.870 | 0.837 | 1.004 | 204.76 | 38.27 | 26 | 79  | 358  | 40.5  | 6.18 |
| O00571 | ATP-dependent RNA helicase DDX3X<br>OS=Homo sapiens<br>GN=DDX3X<br>PE=1 SV=3 - [DDX3X_HUMAN]            | 42.75 | 1 | 7  | 29 | 164 | 1.067 | 1.108 | 0.892 | 1.004 | 407.84 | 42.75 | 46 | 164 | 662  | 73.2  | 7.18 |
| Q86UV5 | Ubiquitin carboxyl-terminal hydrolase 48<br>OS=Homo sapiens<br>GN=USP48<br>PE=1 SV=1 - [UBP48_HUMAN]    | 1.06  | 1 | 1  | 1  | 3   | 1.032 | 1.239 | 1.079 | 1.004 | 9.55   | 1.06  | 2  | 3   | 1035 | 119.0 | 6.05 |
| Q5VYK3 | Proteasome-associated protein ECM29 homolog<br>OS=Homo sapiens<br>GN=ECM29<br>PE=1 SV=2 - [ECM29_HUMAN] | 16.69 | 1 | 24 | 24 | 53  | 0.872 | 0.965 | 1.035 | 1.004 | 117.78 | 16.69 | 32 | 53  | 1845 | 204.2 | 7.12 |
| Q5M9Q1 | NKAP-like protein<br>OS=Homo sapiens<br>GN=NKAPL<br>PE=2 SV=3 - [NKAPL_HUMAN]                           | 2.49  | 2 | 1  | 1  | 2   | 1.021 | 1.199 | 1.262 | 1.004 | 2.25   | 2.49  | 2  | 2   | 402  | 46.3  | 9.72 |
| Q3KRBB | Rho GTPase-activating protein 11B<br>OS=Homo sapiens<br>GN=ARHGAP11B<br>PE=1 SV=1 - [RHGBB_HUMAN]       | 4.49  | 2 | 1  | 2  | 8   | 0.612 | 0.790 | 0.541 | 1.005 | 17.06  | 4.49  | 2  | 8   | 267  | 30.2  | 9.14 |

|        |                                                                                                                           |       |   |    |    |    |       |       |       |       |        |       |    |    |      |       |      |
|--------|---------------------------------------------------------------------------------------------------------------------------|-------|---|----|----|----|-------|-------|-------|-------|--------|-------|----|----|------|-------|------|
| Q9Y3D7 | Mitochondrial import inner membrane translocase subunit TIM16<br>OS=Homo sapiens<br>GN=PAM16<br>PE=1 SV=2 - [TIM16_HUMAN] | 33.60 | 1 | 4  | 5  | 15 | 0.964 | 1.060 | 0.919 | 1.005 | 35.20  | 33.60 | 7  | 15 | 125  | 13.8  | 9.70 |
| Q9NVG8 | TBC1 domain family member 13 OS=Homo sapiens<br>GN=TBC1D13<br>PE=1 SV=3 - [TBC13_HUMAN]                                   | 32.00 | 1 | 10 | 10 | 38 | 0.982 | 0.834 | 1.013 | 1.005 | 104.53 | 32.00 | 16 | 38 | 400  | 46.5  | 5.24 |
| P0DJD0 | RANBP2-like and GRIP domain-containing protein 1<br>OS=Homo sapiens<br>GN=RGPD1<br>PE=2 SV=1 - [RGPD1_HUMAN]              | 16.08 | 6 | 1  | 29 | 74 | 1.077 | 0.992 | 1.165 | 1.005 | 161.88 | 16.08 | 38 | 74 | 1748 | 196.5 | 6.14 |
| O95571 | Persulfide dioxygenase ETHE1, mitochondrial<br>OS=Homo sapiens<br>GN=ETHE1<br>PE=1 SV=2 - [ETHE1_HUMAN]                   | 38.98 | 1 | 7  | 7  | 29 | 1.452 | 1.424 | 1.204 | 1.005 | 78.42  | 38.98 | 11 | 29 | 254  | 27.9  | 6.83 |
| Q8NB66 | Protein unc-13 homolog C<br>OS=Homo sapiens<br>GN=UNC13C<br>PE=2 SV=3 - [UN13C_HUMAN]                                     | 1.36  | 1 | 2  | 3  | 7  | 0.784 | 0.888 | 1.288 | 1.005 | 10.20  | 1.36  | 3  | 7  | 2214 | 250.8 | 5.92 |
| P20936 | Ras GTPase-activating protein 1<br>OS=Homo sapiens<br>GN=RASA1<br>PE=1 SV=1 - [RASA1_HUMAN]                               | 12.03 | 1 | 10 | 10 | 26 | 0.925 | 1.005 | 1.079 | 1.005 | 71.51  | 12.03 | 16 | 26 | 1047 | 116.3 | 6.54 |
| Q13761 | Runt-related transcription factor 3<br>OS=Homo sapiens<br>GN=RUNK3<br>PE=1 SV=2 - [RUNK3_HUMAN]                           | 3.86  | 1 | 1  | 1  | 1  | 0.914 | 1.627 | 1.657 | 1.005 | 3.29   | 3.86  | 1  | 1  | 415  | 44.3  | 9.47 |
| P61812 | Transforming growth factor beta-2<br>OS=Homo sapiens<br>GN=TGFB2<br>PE=1 SV=1 - [TGFB2_HUMAN]                             | 5.31  | 2 | 2  | 3  | 5  | 2.231 | 0.588 | 0.742 | 1.005 | 4.19   | 5.31  | 4  | 5  | 414  | 47.7  | 8.53 |

|        |                                                                                                                          |       |   |    |    |     |       |       |       |       |        |       |    |     |     |       |      |
|--------|--------------------------------------------------------------------------------------------------------------------------|-------|---|----|----|-----|-------|-------|-------|-------|--------|-------|----|-----|-----|-------|------|
| Q9Y6I3 | Epsin-1<br>OS=Homo sapiens<br>GN=EPN1<br>PE=1 SV=2 - [EPN1_HUMAN]                                                        | 23.09 | 1 | 11 | 11 | 26  | 0.993 | 1.302 | 1.164 | 1.005 | 67.97  | 23.09 | 16 | 26  | 576 | 60.3  | 4.83 |
| P04439 | HLA class I histocompatibility antigen, A-3 alpha chain<br>OS=Homo sapiens<br>GN=HLA-A<br>PE=1 SV=2 - [1A03_HUMAN]       | 52.60 | 6 | 4  | 20 | 173 | 2.512 | 0.809 | 1.259 | 1.005 | 417.39 | 52.60 | 33 | 173 | 365 | 40.8  | 6.00 |
| P22234 | Multifunctional protein ADE2<br>OS=Homo sapiens<br>GN=PAICS<br>PE=1 SV=3 - [PUR6_HUMAN]                                  | 29.65 | 1 | 16 | 16 | 56  | 0.784 | 0.981 | 0.690 | 1.005 | 125.10 | 29.65 | 23 | 56  | 425 | 47.0  | 7.23 |
| Q8NBQ5 | Estradiol 17-beta-dehydrogenase 11<br>OS=Homo sapiens<br>GN=HSD17B11<br>PE=1 SV=3 - [DHB11_HUMAN]                        | 18.00 | 1 | 4  | 4  | 9   | 0.995 | 1.014 | 0.811 | 1.005 | 23.10  | 18.00 | 7  | 9   | 300 | 32.9  | 9.07 |
| P17813 | Endoglin<br>OS=Homo sapiens<br>GN=ENG PE=1 SV=2 - [EGLN_HUMAN]                                                           | 22.34 | 1 | 11 | 11 | 22  | 0.728 | 0.383 | 0.514 | 1.005 | 37.52  | 22.34 | 16 | 22  | 658 | 70.5  | 6.61 |
| Q9H855 | Cylin N-terminal domain-containing protein 2<br>OS=Homo sapiens<br>GN=CNTD2<br>PE=2 SV=2 - [CNTD2_HUMAN]                 | 4.89  | 1 | 1  | 1  | 2   | 0.730 | 0.990 | 1.097 | 1.005 | 6.70   | 4.89  | 1  | 2   | 307 | 33.6  | 8.60 |
| Q96RF0 | Sorting nexin-18<br>OS=Homo sapiens<br>GN=SNX18<br>PE=1 SV=2 - [SNX18_HUMAN]                                             | 27.87 | 1 | 15 | 16 | 97  | 0.437 | 0.743 | 0.868 | 1.005 | 258.36 | 27.87 | 25 | 97  | 628 | 68.9  | 5.68 |
| Q8N766 | ER membrane protein complex subunit 1<br>OS=Homo sapiens<br>GN=EMC1<br>PE=1 SV=1 - [EMC1_HUMAN]                          | 20.75 | 1 | 17 | 17 | 59  | 1.021 | 0.765 | 0.907 | 1.005 | 157.08 | 20.75 | 28 | 59  | 993 | 111.7 | 7.66 |
| O95202 | LETM1 and EF-hand domain-containing protein 1, mitochondrial<br>OS=Homo sapiens<br>GN=LETM1<br>PE=1 SV=1 - [LETM1_HUMAN] | 35.18 | 1 | 24 | 24 | 167 | 0.904 | 0.981 | 0.862 | 1.005 | 467.36 | 35.18 | 38 | 167 | 739 | 83.3  | 6.70 |

|        |                                                                                                                                                                                                            |       |   |    |    |     |       |       |       |       |         |       |    |     |      |       |      |
|--------|------------------------------------------------------------------------------------------------------------------------------------------------------------------------------------------------------------|-------|---|----|----|-----|-------|-------|-------|-------|---------|-------|----|-----|------|-------|------|
| Q658Y4 | Protein<br>FAM91A1<br>OS=Homo<br>sapiens<br>GN=FAM91A1<br>PE=1 SV=3 -<br>[F91A1_HUMAN<br>]<br>UBX domain-<br>containing<br>protein 7<br>OS=Homo<br>sapiens<br>GN=UBXN7<br>PE=1 SV=2 -<br>[UBXN7_HUMAN<br>] | 6.09  | 4 | 4  | 5  | 21  | 1.055 | 0.975 | 0.849 | 1.005 | 44.74   | 6.09  | 8  | 21  | 838  | 93.8  | 6.39 |
| Q94888 | Copine-1<br>OS=Homo<br>sapiens<br>GN=CPNE1<br>PE=1 SV=1 -<br>[CPNE1_HUMAN<br>]                                                                                                                             | 9.20  | 1 | 5  | 5  | 13  | 0.963 | 0.997 | 0.723 | 1.006 | 28.91   | 9.20  | 8  | 13  | 489  | 54.8  | 5.16 |
| Q99829 | Stress-70<br>protein,<br>mitochondrial<br>OS=Homo<br>sapiens<br>GN=HSPA9<br>PE=1 SV=2 -<br>[GRP75_HUMAN<br>]                                                                                               | 29.24 | 1 | 15 | 15 | 58  | 0.992 | 1.083 | 1.232 | 1.006 | 125.27  | 29.24 | 23 | 58  | 537  | 59.0  | 5.83 |
| P38646 | CTP synthase 2<br>OS=Homo<br>sapiens<br>GN=CTPS2<br>PE=1 SV=1 -<br>[PYRG2_HUMAN<br>]                                                                                                                       | 61.86 | 1 | 46 | 47 | 639 | 0.812 | 1.131 | 0.957 | 1.006 | 1536.79 | 61.86 | 79 | 639 | 679  | 73.6  | 6.16 |
| Q9NRF8 | LIM domain-<br>containing<br>protein 1<br>OS=Homo<br>sapiens<br>GN=LIMD1<br>PE=1 SV=1 -<br>[LIMD1_HUMAN<br>]                                                                                               | 14.68 | 1 | 5  | 7  | 19  | 1.060 | 1.005 | 1.065 | 1.006 | 41.24   | 14.68 | 10 | 19  | 586  | 65.6  | 6.90 |
| Q9UGP4 | cAMP-<br>dependent<br>protein kinase<br>catalytic<br>subunit beta<br>OS=Homo<br>sapiens<br>GN=PRKACB<br>PE=1 SV=2 -<br>[KAPCB_HUMAN<br>]                                                                   | 17.16 | 1 | 9  | 9  | 35  | 0.936 | 1.328 | 1.695 | 1.006 | 75.15   | 17.16 | 15 | 35  | 676  | 72.1  | 6.65 |
| P22694 | DNA cross-link<br>repair 1A<br>protein<br>OS=Homo<br>sapiens<br>GN=DCLRE1A<br>PE=1 SV=3 -<br>[DCR1A_HUMAN<br>]                                                                                             | 29.63 | 2 | 4  | 14 | 33  | 0.692 | 0.758 | 0.803 | 1.006 | 73.98   | 29.63 | 19 | 33  | 351  | 40.6  | 8.78 |
| Q6PJP8 | Ig mu heavy<br>chain disease<br>protein<br>OS=Homo<br>sapiens PE=1<br>SV=1 -<br>[MUCB_HUMAN]                                                                                                               | 3.75  | 1 | 2  | 3  | 6   | 0.599 | 0.839 | 1.007 | 1.006 | 12.93   | 3.75  | 4  | 6   | 1040 | 116.3 | 7.97 |
| P04220 |                                                                                                                                                                                                            | 3.84  | 2 | 1  | 1  | 1   | 1.126 | 1.294 | 1.411 | 1.006 | 0.00    | 3.84  | 1  | 1   | 391  | 43.0  | 5.24 |

|        |                                                                                                                                                |       |   |    |    |    |       |       |       |       |       |       |    |    |      |       |       |
|--------|------------------------------------------------------------------------------------------------------------------------------------------------|-------|---|----|----|----|-------|-------|-------|-------|-------|-------|----|----|------|-------|-------|
| Q14202 | Zinc finger<br>MYM-type<br>protein 3<br>OS=Homo<br>sapiens<br>GN=ZMYM3<br>PE=1 SV=2 -<br>[ZMYM3_HUMAN]                                         | 1.17  | 1 | 1  | 1  | 5  | 1.004 | 1.793 | 1.590 | 1.006 | 17.56 | 1.17  | 2  | 5  | 1370 | 152.3 | 6.35  |
| Q49B96 | Cytochrome c<br>oxidase<br>assembly<br>protein COX19<br>OS=Homo<br>sapiens<br>GN=COX19<br>PE=1 SV=1 -<br>[COX19_HUMAN]                         | 21.11 | 1 | 2  | 2  | 3  | 1.101 | 1.438 | 1.413 | 1.006 | 4.52  | 21.11 | 3  | 3  | 90   | 10.4  | 8.72  |
| Q9Y3A2 | Probable U3<br>small nucleolar<br>RNA-associated<br>protein 11<br>OS=Homo<br>sapiens<br>GN=UTP11L<br>PE=1 SV=2 -<br>[UTP11_HUMAN]              | 4.74  | 1 | 1  | 1  | 2  | 1.143 | 1.512 | 1.014 | 1.006 | 5.57  | 4.74  | 1  | 2  | 253  | 30.4  | 10.15 |
| Q9Y666 | Solute carrier<br>family 12<br>member 7<br>OS=Homo<br>sapiens<br>GN=SLC12A7<br>PE=1 SV=3 -<br>[S12A7_HUMAN]                                    | 7.29  | 1 | 7  | 7  | 17 | 1.104 | 0.754 | 0.902 | 1.007 | 48.50 | 7.29  | 9  | 17 | 1083 | 119.0 | 6.71  |
| P13284 | Gamma-<br>interferon-<br>inducible<br>lysosomal thiol<br>reductase<br>OS=Homo<br>sapiens<br>GN=IFI30<br>PE=1 SV=3 -<br>[GILT_HUMAN]            | 4.40  | 1 | 1  | 1  | 2  | 0.924 | 1.950 | 0.788 | 1.007 | 4.26  | 4.40  | 1  | 2  | 250  | 27.9  | 4.88  |
| Q13151 | Heterogeneous<br>nuclear<br>ribonucleoprotein<br>A0<br>OS=Homo<br>sapiens<br>GN=HNRNPA0<br>PE=1 SV=1 -<br>[ROA0_HUMAN]                         | 41.64 | 1 | 8  | 10 | 36 | 0.944 | 0.919 | 0.885 | 1.007 | 97.60 | 41.64 | 15 | 36 | 305  | 30.8  | 9.29  |
| P25685 | DnaJ homolog<br>subfamily B<br>member 1<br>OS=Homo<br>sapiens<br>GN=DNAJB1<br>PE=1 SV=4 -<br>[DNJB1_HUMAN]                                     | 29.12 | 1 | 11 | 11 | 24 | 1.016 | 1.026 | 0.872 | 1.007 | 49.49 | 29.12 | 16 | 24 | 340  | 38.0  | 8.63  |
| P48059 | LIM and<br>senescent cell<br>antigen-like-<br>containing<br>domain protein<br>1 OS=Homo<br>sapiens<br>GN=LIMS1<br>PE=1 SV=4 -<br>[LIMS1_HUMAN] | 22.15 | 1 | 5  | 8  | 31 | 1.195 | 1.300 | 0.914 | 1.007 | 78.64 | 22.15 | 14 | 31 | 325  | 37.2  | 8.05  |

|        |                                                                                                                          |       |   |    |    |     |       |       |       |       |        |       |     |     |      |       |      |
|--------|--------------------------------------------------------------------------------------------------------------------------|-------|---|----|----|-----|-------|-------|-------|-------|--------|-------|-----|-----|------|-------|------|
| A8MPX8 | Protein phosphatase 2C-like domain-containing protein 1<br>OS=Homo sapiens<br>GN=PP2D1<br>PE=2 SV=2 - [PP2D1_HUMAN]      | 2.86  | 1 | 1  | 1  | 2   | 1.522 | 0.273 | 0.494 | 1.007 | 0.00   | 2.86  | 1   | 2   | 630  | 71.6  | 8.72 |
| Q9NZB2 | Constitutive coactivator of PPAR-gamma-like protein 1<br>OS=Homo sapiens<br>GN=FAM120A<br>PE=1 SV=2 - [F120A_HUMAN]      | 25.76 | 2 | 19 | 21 | 111 | 1.076 | 1.009 | 0.956 | 1.007 | 307.99 | 25.76 | 34  | 111 | 1118 | 121.8 | 8.88 |
| O94992 | Protein HEXIM1<br>OS=Homo sapiens<br>GN=HEXIM1<br>PE=1 SV=1 - [HEX1_HUMAN]                                               | 14.48 | 1 | 5  | 5  | 14  | 1.227 | 1.284 | 0.920 | 1.007 | 43.49  | 14.48 | 8   | 14  | 359  | 40.6  | 4.89 |
| Q15814 | Tubulin-specific chaperone C<br>OS=Homo sapiens<br>GN=TBCC<br>PE=1 SV=2 - [TBCC_HUMAN]                                   | 25.72 | 1 | 7  | 8  | 31  | 1.013 | 1.000 | 1.074 | 1.007 | 82.10  | 25.72 | 13  | 31  | 346  | 39.2  | 5.71 |
| Q8N9V6 | Ankyrin repeat domain-containing protein 53<br>OS=Homo sapiens<br>GN=ANKRD53<br>PE=2 SV=3 - [ANR53_HUMAN]                | 3.96  | 1 | 1  | 1  | 1   | 0.826 | 0.595 | 0.834 | 1.007 | 2.48   | 3.96  | 1   | 1   | 530  | 59.5  | 9.52 |
| P49327 | Fatty acid synthase<br>OS=Homo sapiens<br>GN=FASN<br>PE=1 SV=3 - [FAS_HUMAN]                                             | 35.88 | 1 | 68 | 70 | 288 | 0.883 | 0.681 | 1.046 | 1.007 | 607.58 | 35.88 | 117 | 288 | 2511 | 273.3 | 6.44 |
| Q14746 | Conserved oligomeric Golgi complex subunit 2<br>OS=Homo sapiens<br>GN=COG2<br>PE=1 SV=1 - [COG2_HUMAN]                   | 4.34  | 1 | 4  | 4  | 7   | 1.018 | 0.819 | 1.048 | 1.007 | 12.27  | 4.34  | 5   | 7   | 738  | 83.2  | 6.62 |
| Q96P16 | Regulation of nuclear pre-mRNA domain-containing protein 1A<br>OS=Homo sapiens<br>GN=RPRD1A<br>PE=1 SV=1 - [RPR1A_HUMAN] | 11.86 | 1 | 2  | 4  | 5   | 0.741 | 1.063 | 1.089 | 1.008 | 9.22   | 11.86 | 4   | 5   | 312  | 35.7  | 7.55 |

|        |                                                                                                                               |       |   |    |    |    |       |       |       |       |        |       |    |    |      |       |      |
|--------|-------------------------------------------------------------------------------------------------------------------------------|-------|---|----|----|----|-------|-------|-------|-------|--------|-------|----|----|------|-------|------|
| P40938 | Replication factor C subunit 3<br>OS=Homo sapiens<br>GN=RFC3<br>PE=1 SV=2 - [RFC3_HUMAN]<br>Kelch domain-containing protein 4 | 3.37  | 1 | 1  | 1  | 4  | 1.181 | 1.221 | 1.476 | 1.008 | 13.27  | 3.37  | 2  | 4  | 356  | 40.5  | 8.34 |
| Q8TB85 | OS=Homo sapiens<br>GN=KLHDC4<br>PE=1 SV=1 - [KLDC4_HUMAN]<br>Ubiquitin carboxyl-terminal hydrolase 25                         | 4.62  | 1 | 2  | 2  | 3  | 0.782 | 1.088 | 1.535 | 1.008 | 5.57   | 4.62  | 3  | 3  | 520  | 57.9  | 5.72 |
| Q9UHP3 | OS=Homo sapiens<br>GN=USP25<br>PE=1 SV=4 - [UBP25_HUMAN]<br>Platelet-derived growth factor receptor alpha                     | 4.83  | 2 | 4  | 6  | 14 | 0.850 | 1.086 | 1.016 | 1.008 | 21.11  | 4.83  | 8  | 14 | 1055 | 122.1 | 5.34 |
| P16234 | OS=Homo sapiens<br>GN=PDGFRA<br>PE=1 SV=1 - [PGFRA_HUMAN]<br>LisH domain-containing protein ARMC9                             | 17.81 | 6 | 16 | 18 | 49 | 2.569 | 0.990 | 0.661 | 1.008 | 117.67 | 17.81 | 28 | 49 | 1089 | 122.6 | 5.17 |
| Q7Z3E5 | OS=Homo sapiens<br>GN=ARMC9<br>PE=1 SV=2 - [ARMC9_HUMAN]<br>RAD50-interacting protein 1                                       | 9.42  | 1 | 7  | 8  | 23 | 1.593 | 0.700 | 1.495 | 1.008 | 57.48  | 9.42  | 13 | 23 | 817  | 91.7  | 6.20 |
| Q6NUQ1 | OS=Homo sapiens<br>GN=RINT1<br>PE=1 SV=1 - [RINT1_HUMAN]<br>Acyl-CoA-binding domain-containing protein 6                      | 4.17  | 1 | 3  | 4  | 5  | 0.746 | 0.794 | 0.701 | 1.008 | 7.96   | 4.17  | 4  | 5  | 792  | 90.6  | 5.45 |
| Q9BR61 | OS=Homo sapiens<br>GN=ACBD6<br>PE=1 SV=1 - [ACBD6_HUMAN]<br>MICOS complex subunit MIC27                                       | 13.12 | 1 | 4  | 4  | 21 | 1.166 | 1.032 | 0.955 | 1.008 | 23.72  | 13.12 | 6  | 21 | 282  | 31.1  | 5.11 |
| Q6UXV4 | OS=Homo sapiens<br>GN=APOOL<br>PE=1 SV=1 - [MIC27_HUMAN]                                                                      | 29.85 | 1 | 5  | 5  | 15 | 0.942 | 0.849 | 1.329 | 1.008 | 50.95  | 29.85 | 6  | 15 | 268  | 29.1  | 9.52 |

|        |                                                                                                                  |       |   |    |    |     |       |       |       |       |        |       |    |     |      |       |      |
|--------|------------------------------------------------------------------------------------------------------------------|-------|---|----|----|-----|-------|-------|-------|-------|--------|-------|----|-----|------|-------|------|
| Q13347 | Eukaryotic translation initiation factor 3 subunit I<br>OS=Homo sapiens<br>GN=EIF3I<br>PE=1 SV=1 - [EIF3I_HUMAN] | 45.23 | 1 | 13 | 14 | 69  | 0.995 | 0.969 | 1.037 | 1.008 | 169.16 | 45.23 | 22 | 69  | 325  | 36.5  | 5.64 |
| Q9NSD9 | Phenylalanine--tRNA ligase beta subunit<br>OS=Homo sapiens<br>GN=FARSB<br>PE=1 SV=3 - [SYFB_HUMAN]               | 39.56 | 2 | 24 | 24 | 77  | 0.888 | 0.994 | 0.977 | 1.008 | 206.20 | 39.56 | 36 | 77  | 589  | 66.1  | 6.84 |
| Q5VTT5 | Myomesin-3<br>OS=Homo sapiens<br>GN=MYOM3<br>PE=2 SV=1 - [MYOM3_HUMAN]                                           | 0.84  | 1 | 1  | 1  | 1   | 0.626 | 0.973 | 0.538 | 1.008 | 2.71   | 0.84  | 1  | 1   | 1437 | 162.1 | 6.23 |
| Q96FV2 | Secernin-2<br>OS=Homo sapiens<br>GN=SCRN2<br>PE=1 SV=3 - [SCRN2_HUMAN]                                           | 14.35 | 1 | 4  | 4  | 17  | 1.322 | 0.815 | 1.003 | 1.008 | 48.85  | 14.35 | 7  | 17  | 425  | 46.6  | 5.67 |
| Q9P2X3 | Protein IMPACT<br>OS=Homo sapiens<br>GN=IMPACT<br>PE=1 SV=2 - [IMPACT_HUMAN]                                     | 19.06 | 1 | 5  | 5  | 18  | 1.134 | 1.019 | 0.954 | 1.008 | 48.98  | 19.06 | 8  | 18  | 320  | 36.5  | 4.97 |
| Q0GE19 | Sodium/bile acid cotransporter 7<br>OS=Homo sapiens<br>GN=SLC10A7<br>PE=2 SV=1 - [NTPC7_HUMAN]                   | 1.68  | 1 | 1  | 1  | 1   | 0.397 |       | 0.103 | 1.009 | 1.98   | 1.68  | 1  | 1   | 358  | 39.5  | 9.50 |
| Q08AM6 | Protein VAC14 homolog<br>OS=Homo sapiens<br>GN=VAC14<br>PE=1 SV=1 - [VAC14_HUMAN]                                | 9.59  | 1 | 7  | 7  | 15  | 1.040 | 0.994 | 1.184 | 1.009 | 39.16  | 9.59  | 11 | 15  | 782  | 87.9  | 6.13 |
| Q5T0F9 | Coiled-coil and C2 domain-containing protein 1B<br>OS=Homo sapiens<br>GN=CC2D1B<br>PE=1 SV=1 - [C2D1B_HUMAN]     | 8.51  | 1 | 7  | 8  | 21  | 1.031 | 1.124 | 1.238 | 1.009 | 41.27  | 8.51  | 12 | 21  | 858  | 94.2  | 5.26 |
| Q14008 | Cytoskeleton-associated protein 5<br>OS=Homo sapiens<br>GN=CKAP5<br>PE=1 SV=3 - [CKAP5_HUMAN]                    | 27.36 | 1 | 54 | 55 | 167 | 0.864 | 0.991 | 0.910 | 1.009 | 344.78 | 27.36 | 88 | 167 | 2032 | 225.4 | 7.80 |



|        |                                                                                                                               |       |   |    |    |    |       |       |       |       |        |       |    |    |     |      |      |
|--------|-------------------------------------------------------------------------------------------------------------------------------|-------|---|----|----|----|-------|-------|-------|-------|--------|-------|----|----|-----|------|------|
| Q8NE01 | Metal transporter<br>CNNM3<br>OS=Homo sapiens<br>GN=CNNM3<br>PE=1 SV=1 - [CNNM3_HUMA]                                         | 6.36  | 1 | 3  | 4  | 8  | 1.208 | 1.044 | 1.075 | 1.009 | 12.48  | 6.36  | 6  | 8  | 707 | 76.1 | 6.09 |
| Q00577 | Transcriptional activator protein Pur-alpha<br>OS=Homo sapiens<br>GN=PURA<br>PE=1 SV=2 - [PURA_HUMAN]                         | 23.91 | 3 | 5  | 8  | 25 | 1.448 | 0.955 | 1.013 | 1.009 | 52.79  | 23.91 | 10 | 25 | 322 | 34.9 | 6.44 |
| P16383 | GC-rich sequence DNA-binding factor 2<br>OS=Homo sapiens<br>GN=GFCF2<br>PE=1 SV=2 - [GFCF2_HUMAN]                             | 5.12  | 1 | 4  | 4  | 20 | 1.225 | 0.816 | 0.954 | 1.009 | 58.69  | 5.12  | 6  | 20 | 781 | 89.3 | 5.99 |
| Q4VC31 | Coiled-coil domain-containing protein 58<br>OS=Homo sapiens<br>GN=CCDC58<br>PE=1 SV=1 - [CCDC58_HUMAN]                        | 23.61 | 1 | 3  | 3  | 9  | 0.918 | 1.021 | 0.891 | 1.009 | 14.11  | 23.61 | 4  | 9  | 144 | 16.6 | 7.81 |
| Q8IYD1 | Eukaryotic peptide chain release factor GTP-binding subunit ERF3B<br>OS=Homo sapiens<br>GN=GSPT2<br>PE=1 SV=2 - [ERF3B_HUMAN] | 28.18 | 1 | 4  | 22 | 79 | 1.046 | 1.085 | 1.129 | 1.009 | 177.64 | 28.18 | 34 | 79 | 628 | 68.8 | 5.43 |
| Q8NFQ8 | Torsin-1A-interacting protein 2<br>OS=Homo sapiens<br>GN=TOR1AIP2<br>PE=1 SV=1 - [TOIP2_HUMAN]                                | 35.53 | 1 | 12 | 13 | 34 | 1.213 | 1.115 | 1.018 | 1.009 | 92.61  | 35.53 | 19 | 34 | 470 | 51.2 | 4.96 |
| Q16563 | Synaptophysin-like protein 1<br>OS=Homo sapiens<br>GN=SYPL1<br>PE=1 SV=1 - [SYPL1_HUMAN]                                      | 2.32  | 1 | 1  | 1  | 2  | 1.279 | 1.051 | 0.924 | 1.009 | 2.09   | 2.32  | 1  | 2  | 259 | 28.5 | 8.43 |
| Q6PCE3 | Glucose 1,6-bisphosphate synthase<br>OS=Homo sapiens<br>GN=PGM2L1<br>PE=1 SV=3 - [PGM2L_HUMAN]                                | 13.34 | 1 | 10 | 10 | 30 | 1.190 | 1.220 | 0.859 | 1.009 | 57.13  | 13.34 | 15 | 30 | 622 | 70.4 | 7.15 |
| P52758 | Ribonuclease UK114<br>OS=Homo sapiens<br>GN=HRSP12<br>PE=1 SV=1 - [UK114_HUMAN]                                               | 38.69 | 1 | 5  | 5  | 11 | 0.582 | 1.037 | 0.578 | 1.009 | 24.03  | 38.69 | 6  | 11 | 137 | 14.5 | 8.68 |

|        |                                                                                                                                                   |       |   |    |    |    |       |       |       |       |        |       |    |    |      |       |      |
|--------|---------------------------------------------------------------------------------------------------------------------------------------------------|-------|---|----|----|----|-------|-------|-------|-------|--------|-------|----|----|------|-------|------|
| Q9UNS2 | COP9<br>signalosome<br>complex<br>subunit 3<br>OS=Homo<br>sapiens<br>GN=COPS3<br>PE=1 SV=3 -<br>[CSNB_HUMAN]                                      | 30.02 | 1 | 11 | 11 | 35 | 0.888 | 1.030 | 0.840 | 1.009 | 92.48  | 30.02 | 18 | 35 | 423  | 47.8  | 6.65 |
| Q8WVY7 | Ubiquitin-like<br>domain-<br>containing CTD<br>phosphatase 1<br>OS=Homo<br>sapiens<br>GN=UBLCP1<br>PE=1 SV=2 -<br>[UBCP1_HUMAN<br>]               | 28.93 | 1 | 12 | 12 | 52 | 0.939 | 0.916 | 1.052 | 1.009 | 105.82 | 28.93 | 18 | 52 | 318  | 36.8  | 6.46 |
| O75074 | Low-density<br>lipoprotein<br>receptor-<br>related protein<br>3 OS=Homo<br>sapiens<br>GN=LRP3 PE=2<br>SV=2 -<br>[LRP3_HUMAN]                      | 2.34  | 1 | 1  | 1  | 3  | 1.143 | 1.049 | 1.183 | 1.009 | 0.00   | 2.34  | 1  | 3  | 770  | 82.8  | 6.21 |
| Q15283 | Ras GTPase-<br>activating<br>protein 2<br>OS=Homo<br>sapiens<br>GN=RASA2<br>PE=1 SV=3 -<br>[RASA2_HUMAN<br>]                                      | 5.88  | 1 | 4  | 6  | 13 | 0.977 | 0.868 | 0.848 | 1.009 | 26.29  | 5.88  | 9  | 13 | 850  | 96.6  | 7.20 |
| Q9P2R7 | Succinyl-CoA<br>ligase [ADP-<br>forming]<br>subunit beta,<br>mitochondrial<br>OS=Homo<br>sapiens<br>GN=SUCLA2<br>PE=1 SV=3 -<br>[SUCB1_HUMAN<br>] | 23.33 | 1 | 11 | 11 | 43 | 1.036 | 1.108 | 1.022 | 1.009 | 87.55  | 23.33 | 18 | 43 | 463  | 50.3  | 7.42 |
| P04626 | Receptor<br>tyrosine-<br>protein kinase<br>erbB-2<br>OS=Homo<br>sapiens<br>GN=ERBB2<br>PE=1 SV=1 -<br>[ERBB2_HUMAN]                               | 4.94  | 4 | 3  | 6  | 17 | 1.355 | 0.811 | 0.884 | 1.009 | 29.00  | 4.94  | 10 | 17 | 1255 | 137.8 | 5.91 |
| Q9C0B5 | Palmitoyltransf<br>erase ZDHHC5<br>OS=Homo<br>sapiens<br>GN=ZDHHC5<br>PE=1 SV=2 -<br>[ZDHCS_HUMAN<br>]                                            | 18.88 | 1 | 11 | 11 | 26 | 1.428 | 0.889 | 0.985 | 1.010 | 63.86  | 18.88 | 15 | 26 | 715  | 77.5  | 9.01 |
| Q9BSR8 | Protein YIPF4<br>OS=Homo<br>sapiens<br>GN=YIPF4<br>PE=1 SV=1 -<br>[YIPF4_HUMAN<br>]                                                               | 7.38  | 1 | 2  | 2  | 9  | 0.923 | 0.917 | 0.947 | 1.010 | 16.61  | 7.38  | 4  | 9  | 244  | 27.1  | 4.65 |

|        |                                                                                                                        |       |   |    |    |     |       |       |       |       |        |       |    |     |     |       |      |
|--------|------------------------------------------------------------------------------------------------------------------------|-------|---|----|----|-----|-------|-------|-------|-------|--------|-------|----|-----|-----|-------|------|
| P78371 | T-complex protein 1 subunit beta<br>OS=Homo sapiens<br>GN=CCT2<br>PE=1 SV=4 - [TCPB_HUMAN]                             | 68.97 | 1 | 33 | 33 | 345 | 0.944 | 1.038 | 1.081 | 1.010 | 873.23 | 68.97 | 58 | 345 | 535 | 57.5  | 6.46 |
| Q9Y227 | Ectonucleoside triphosphate diphosphohydrolase 4<br>OS=Homo sapiens<br>GN=ENTPD4<br>PE=1 SV=1 - [ENTP4_HUMAN]          | 1.95  | 1 | 1  | 1  | 1   | 1.156 | 0.724 | 1.058 | 1.010 | 2.72   | 1.95  | 1  | 1   | 616 | 70.2  | 8.29 |
| Q6PI78 | Transmembrane protein 65<br>OS=Homo sapiens<br>GN=TMEM65<br>PE=1 SV=2 - [TMM65_HUMAN]                                  | 13.75 | 1 | 3  | 3  | 10  | 1.202 | 1.065 | 0.681 | 1.010 | 15.77  | 13.75 | 5  | 10  | 240 | 25.5  | 8.60 |
| Q9Y2V2 | Calcium-regulated heat stable protein 1<br>OS=Homo sapiens<br>GN=CARHSP1<br>PE=1 SV=2 - [CHSP1_HUMAN]                  | 51.70 | 1 | 5  | 5  | 20  | 1.345 | 0.931 | 0.817 | 1.010 | 49.93  | 51.70 | 6  | 20  | 147 | 15.9  | 8.21 |
| Q96GP6 | Scavenger receptor class F member 2<br>OS=Homo sapiens<br>GN=SCARF2<br>PE=1 SV=4 - [SREC2_HUMAN]                       | 10.46 | 1 | 8  | 8  | 20  | 0.966 | 0.662 | 0.737 | 1.010 | 40.81  | 10.46 | 12 | 20  | 870 | 92.4  | 8.44 |
| Q86UT6 | NLR family member X1<br>OS=Homo sapiens<br>GN=NLRX1<br>PE=1 SV=1 - [NLRX1_HUMAN]                                       | 6.36  | 1 | 5  | 5  | 14  | 0.843 | 0.885 | 1.013 | 1.010 | 39.25  | 6.36  | 8  | 14  | 975 | 107.5 | 7.37 |
| Q9UNH7 | Sorting nexin-6<br>OS=Homo sapiens<br>GN=SNX6<br>PE=1 SV=1 - [SNX6_HUMAN]                                              | 36.95 | 2 | 19 | 21 | 111 | 1.114 | 0.898 | 0.959 | 1.010 | 263.17 | 36.95 | 35 | 111 | 406 | 46.6  | 6.16 |
| Q86X27 | Ras-specific guanine nucleotide-releasing factor RalGPS2<br>OS=Homo sapiens<br>GN=RALGPS2<br>PE=1 SV=1 - [RGPS2_HUMAN] | 11.32 | 2 | 6  | 6  | 15  | 0.819 | 0.862 | 1.208 | 1.010 | 34.16  | 11.32 | 9  | 15  | 583 | 65.1  | 8.73 |
| Q9NXC5 | WD repeat-containing protein mio<br>OS=Homo sapiens<br>GN=MIOS<br>PE=1 SV=2 - [MIO_HUMAN]                              | 6.86  | 1 | 5  | 5  | 13  | 0.915 | 0.936 | 0.874 | 1.010 | 32.24  | 6.86  | 8  | 13  | 875 | 98.5  | 6.73 |

|        |                                                                                                                                |       |   |    |    |     |       |       |       |       |        |       |    |      |       |       |      |
|--------|--------------------------------------------------------------------------------------------------------------------------------|-------|---|----|----|-----|-------|-------|-------|-------|--------|-------|----|------|-------|-------|------|
| Q96DN5 | TBC1 domain family member 31 OS=Homo sapiens<br>GN=TBC1D31<br>PE=2 SV=2 - [TBC31_HUMAN]                                        | 0.84  | 1 | 1  | 1  | 1   | 1.324 | 0.881 | 1.010 | 2.38  | 0.84   | 1     | 1  | 1066 | 124.1 | 8.62  |      |
| Q9BXC9 | Bardet-Biedl syndrome 2 protein OS=Homo sapiens<br>GN=BBS2<br>PE=1 SV=1 - [BBS2_HUMAN]                                         | 1.94  | 1 | 1  | 1  | 6   | 0.908 | 1.055 | 0.828 | 1.010 | 18.15  | 1.94  | 2  | 6    | 721   | 79.8  | 6.15 |
| O75427 | Leucine-rich repeat and calponin homology domain-containing protein 4 OS=Homo sapiens<br>GN=LRCH4<br>PE=1 SV=2 - [LRCH4_HUMAN] | 14.20 | 1 | 7  | 7  | 18  | 0.970 | 1.127 | 1.323 | 1.010 | 30.19  | 14.20 | 11 | 18   | 683   | 73.4  | 8.22 |
| Q9P0L0 | Vesicle-associated membrane protein-associated protein A OS=Homo sapiens<br>GN=VAPA<br>PE=1 SV=3 - [VAPA_HUMAN]                | 46.99 | 1 | 14 | 15 | 120 | 1.133 | 1.069 | 0.930 | 1.010 | 257.86 | 46.99 | 23 | 120  | 249   | 27.9  | 8.62 |
| P49454 | Centromere protein F OS=Homo sapiens<br>GN=CENPF<br>PE=1 SV=2 - [CENPF_HUMAN]                                                  | 4.08  | 2 | 7  | 15 | 28  | 1.480 | 0.958 | 1.609 | 1.010 | 59.46  | 4.08  | 16 | 28   | 3210  | 367.5 | 5.07 |
| Q92997 | Segment polarity protein dishevelled homolog DVL-3 OS=Homo sapiens<br>GN=DVL3 PE=1 SV=2 - [DVL3_HUMAN]                         | 10.20 | 3 | 7  | 7  | 15  | 0.968 | 1.203 | 1.371 | 1.010 | 26.34  | 10.20 | 10 | 15   | 716   | 78.0  | 6.65 |
| Q63HN8 | E3 ubiquitin-protein ligase RNF213 OS=Homo sapiens<br>GN=RNF213<br>PE=1 SV=3 - [RNF213_HUMAN]                                  | 10.29 | 1 | 44 | 46 | 105 | 1.526 | 1.086 | 1.035 | 1.011 | 236.92 | 10.29 | 68 | 105  | 5207  | 591.0 | 6.48 |
| Q9HCM3 | UPF0606 protein KIAA1549 OS=Homo sapiens<br>GN=KIAA1549<br>PE=1 SV=4 - [K1549_HUMAN]                                           | 0.36  | 1 | 1  | 1  | 3   | 0.818 | 0.958 | 0.892 | 1.011 | 2.09   | 0.36  | 2  | 3    | 1950  | 210.6 | 6.11 |

|        |                                                                                                        |       |   |    |    |     |       |       |       |       |        |       |    |     |     |      |       |
|--------|--------------------------------------------------------------------------------------------------------|-------|---|----|----|-----|-------|-------|-------|-------|--------|-------|----|-----|-----|------|-------|
| Q96DD0 | Leucine-rich repeat-containing protein 39<br>OS=Homo sapiens<br>GN=LRRC39<br>PE=2 SV=1 - [LR39_HUMAN]  | 7.76  | 1 | 1  | 2  | 3   | 0.679 | 0.741 | 1.068 | 1.011 | 0.00   | 7.76  | 2  | 3   | 335 | 38.8 | 6.34  |
| O14562 | Ubiquitin domain-containing protein UBF1<br>OS=Homo sapiens<br>GN=UBFD1<br>PE=1 SV=2 - [UBFD1_HUMAN]   | 25.89 | 1 | 9  | 9  | 26  | 0.813 | 1.143 | 0.926 | 1.011 | 59.47  | 25.89 | 12 | 26  | 309 | 33.4 | 5.77  |
| P07902 | Galactose-1-phosphate uridylyltransferase<br>OS=Homo sapiens<br>GN=GALT<br>PE=1 SV=3 - [GALT_HUMAN]    | 16.62 | 1 | 5  | 5  | 18  | 1.208 | 1.026 | 1.052 | 1.011 | 46.57  | 16.62 | 8  | 18  | 379 | 43.3 | 6.99  |
| Q6P5R6 | 60S ribosomal protein L22-like 1<br>OS=Homo sapiens<br>GN=RPL22L1<br>PE=1 SV=2 - [RL22L_HUMAN]         | 45.08 | 1 | 4  | 4  | 12  | 0.711 | 1.467 | 1.392 | 1.011 | 22.38  | 45.08 | 5  | 12  | 122 | 14.6 | 9.38  |
| O00139 | Kinesin-like protein KIF2A<br>OS=Homo sapiens<br>GN=KIF2A<br>PE=1 SV=3 - [KIF2A_HUMAN]                 | 14.45 | 2 | 11 | 11 | 26  | 0.819 | 1.035 | 0.978 | 1.011 | 48.36  | 14.45 | 16 | 26  | 706 | 79.9 | 6.68  |
| Q9H6X2 | Anthrax toxin receptor 1<br>OS=Homo sapiens<br>GN=ANTXR1<br>PE=1 SV=2 - [ANTR1_HUMAN]                  | 17.20 | 1 | 8  | 11 | 43  | 1.656 | 0.410 | 0.703 | 1.011 | 87.86  | 17.20 | 18 | 43  | 564 | 62.7 | 7.61  |
| P62851 | 40S ribosomal protein S25<br>OS=Homo sapiens<br>GN=RPS25<br>PE=1 SV=1 - [RS25_HUMAN]                   | 42.40 | 1 | 8  | 8  | 155 | 0.863 | 1.059 | 0.918 | 1.011 | 276.11 | 42.40 | 14 | 155 | 125 | 13.7 | 10.11 |
| Q9NUQ8 | ATP-binding cassette sub-family F member 3<br>OS=Homo sapiens<br>GN=ABCF3<br>PE=1 SV=2 - [ABCF3_HUMAN] | 19.61 | 1 | 13 | 13 | 33  | 0.963 | 0.783 | 1.052 | 1.011 | 69.99  | 19.61 | 20 | 33  | 709 | 79.7 | 6.34  |
| Q9BX67 | Junctional adhesion molecule C<br>OS=Homo sapiens<br>GN=JAM3<br>PE=1 SV=1 - [JAM3_HUMAN]               | 9.35  | 1 | 3  | 3  | 8   | 1.686 | 0.959 | 1.075 | 1.011 | 17.91  | 9.35  | 5  | 8   | 310 | 35.0 | 7.59  |

|        |                                                                                                           |       |   |    |    |     |       |       |       |       |        |       |    |     |      |       |       |
|--------|-----------------------------------------------------------------------------------------------------------|-------|---|----|----|-----|-------|-------|-------|-------|--------|-------|----|-----|------|-------|-------|
| P09525 | Annexin A4<br>OS=Homo sapiens<br>GN=ANXA4<br>PE=1 SV=4 - [ANXA4_HUMAN]                                    | 68.34 | 1 | 23 | 24 | 249 | 0.956 | 1.133 | 1.068 | 1.011 | 600.15 | 68.34 | 41 | 249 | 319  | 35.9  | 6.13  |
| Q13363 | C-terminal-binding protein 1<br>OS=Homo sapiens<br>GN=CTBP1<br>PE=1 SV=2 - [CTBP1_HUMAN]                  | 22.95 | 1 | 6  | 9  | 36  | 1.014 | 1.194 | 1.008 | 1.012 | 96.59  | 22.95 | 17 | 36  | 440  | 47.5  | 6.77  |
| Q9UQ16 | Dynamin-3<br>OS=Homo sapiens<br>GN=DNM3<br>PE=1 SV=4 - [DYNB_HUMAN]                                       | 11.97 | 1 | 1  | 13 | 37  | 1.280 | 1.184 | 1.528 | 1.012 | 57.81  | 11.97 | 18 | 37  | 869  | 97.7  | 8.35  |
| Q96LQ0 | Protein phosphatase 1 regulatory subunit 36<br>OS=Homo sapiens<br>GN=PPP1R36<br>PE=1 SV=1 - [PPR36_HUMAN] | 1.66  | 1 | 1  | 1  | 1   | 0.230 | 1.163 | 3.075 | 1.012 | 2.54   | 1.66  | 1  | 1   | 422  | 49.4  | 9.36  |
| O75581 | Low-density lipoprotein receptor-related protein 6<br>OS=Homo sapiens<br>GN=LRP6 PE=1 SV=2 - [LRP6_HUMAN] | 1.12  | 1 | 2  | 2  | 5   | 0.798 | 0.836 | 0.970 | 1.012 | 11.29  | 1.12  | 2  | 5   | 1613 | 180.3 | 5.31  |
| O14681 | Etoposide-induced protein 2.4 homolog<br>OS=Homo sapiens<br>GN=EI24 PE=1 SV=4 - [EI24_HUMAN]              | 6.47  | 1 | 2  | 3  | 13  | 0.746 | 1.039 | 0.874 | 1.012 | 27.19  | 6.47  | 4  | 13  | 340  | 38.9  | 9.72  |
| P62750 | 60S ribosomal protein L23a<br>OS=Homo sapiens<br>GN=RPL23A<br>PE=1 SV=1 - [RL23A_HUMAN]                   | 52.56 | 1 | 14 | 14 | 145 | 1.059 | 1.292 | 1.024 | 1.012 | 376.75 | 52.56 | 24 | 145 | 156  | 17.7  | 10.45 |
| Q96J42 | Thioredoxin domain-containing protein 15<br>OS=Homo sapiens<br>GN=TXNDC15<br>PE=1 SV=1 - [TXD15_HUMAN]    | 11.39 | 1 | 2  | 3  | 7   | 0.592 | 1.036 | 0.806 | 1.012 | 10.61  | 11.39 | 3  | 7   | 360  | 39.9  | 4.83  |
| Q9NWX2 | Notchless protein homolog 1<br>OS=Homo sapiens<br>GN=NLE1 PE=1 SV=4 - [NLE1_HUMAN]                        | 2.27  | 1 | 1  | 1  | 4   | 1.024 | 0.780 | 0.670 | 1.012 | 14.62  | 2.27  | 1  | 4   | 485  | 53.3  | 7.34  |

|        |                                                                                                              |       |   |    |    |     |       |       |       |       |        |       |    |     |      |       |      |
|--------|--------------------------------------------------------------------------------------------------------------|-------|---|----|----|-----|-------|-------|-------|-------|--------|-------|----|-----|------|-------|------|
| O00458 | Interferon-related developmental regulator 1<br>OS=Homo sapiens<br>GN=IFRD1<br>PE=1 SV=4 - [IFRD1_HUMAN]     | 1.77  | 1 | 1  | 1  | 1   | 0.702 | 1.064 | 0.825 | 1.012 | 2.51   | 1.77  | 1  | 1   | 451  | 50.2  | 7.18 |
| Q92626 | Peroxidasin homolog<br>OS=Homo sapiens<br>GN=PXDN<br>PE=1 SV=2 - [PXDN_HUMAN]                                | 23.87 | 1 | 28 | 29 | 102 | 1.182 | 0.591 | 0.679 | 1.012 | 280.45 | 23.87 | 47 | 102 | 1479 | 165.2 | 7.17 |
| Q6IQ26 | DENN domain-containing protein 5A<br>OS=Homo sapiens<br>GN=DENND5A<br>PE=1 SV=2 - [DENND5A_HUMAN]            | 4.43  | 1 | 3  | 5  | 11  | 1.072 | 0.904 | 1.094 | 1.012 | 17.53  | 4.43  | 6  | 11  | 1287 | 147.0 | 6.65 |
| A6NIH7 | Protein unc-119 homolog B<br>OS=Homo sapiens<br>GN=UNC119B<br>PE=1 SV=1 - [UI119B_HUMAN]                     | 38.65 | 1 | 6  | 6  | 15  | 1.114 | 1.201 | 1.148 | 1.012 | 33.85  | 38.65 | 9  | 15  | 251  | 28.1  | 5.68 |
| Q7L1W4 | Volume-regulated anion channel subunit LRRC8D<br>OS=Homo sapiens<br>GN=LRRC8D<br>PE=1 SV=1 - [LRRC8D_HUMAN]  | 4.08  | 1 | 2  | 3  | 4   | 1.099 | 1.257 | 0.990 | 1.012 | 2.00   | 4.08  | 4  | 4   | 858  | 98.1  | 7.72 |
| P08473 | Neprilysin<br>OS=Homo sapiens<br>GN=MME PE=1 SV=2 - [NEP_HUMAN]                                              | 12.80 | 1 | 9  | 9  | 15  | 3.612 | 0.665 | 0.919 | 1.012 | 32.67  | 12.80 | 12 | 15  | 750  | 85.5  | 5.73 |
| O43617 | Trafficking protein particle complex subunit 3<br>OS=Homo sapiens<br>GN=TRAPPC3<br>PE=1 SV=1 - [TPPC3_HUMAN] | 31.11 | 1 | 5  | 5  | 25  | 1.274 | 1.200 | 1.190 | 1.012 | 44.39  | 31.11 | 9  | 25  | 180  | 20.3  | 4.96 |
| Q9HAU5 | Regulator of nonsense transcripts 2<br>OS=Homo sapiens<br>GN=UPF2<br>PE=1 SV=1 - [RENT2_HUMAN]               | 8.88  | 1 | 9  | 9  | 27  | 0.939 | 0.899 | 0.842 | 1.013 | 57.42  | 8.88  | 11 | 27  | 1272 | 147.7 | 5.69 |
| Q96JJ3 | Engulfment and cell motility protein 2<br>OS=Homo sapiens<br>GN=ELMO2<br>PE=1 SV=2 - [ELMO2_HUMAN]           | 19.31 | 1 | 13 | 13 | 33  | 1.078 | 0.767 | 0.852 | 1.013 | 70.71  | 19.31 | 19 | 33  | 720  | 82.6  | 5.90 |

|        |                                                                                                                                                     |       |   |    |    |    |       |       |       |       |       |       |    |    |      |       |       |
|--------|-----------------------------------------------------------------------------------------------------------------------------------------------------|-------|---|----|----|----|-------|-------|-------|-------|-------|-------|----|----|------|-------|-------|
| Q6ZTQ4 | Cadherin-related family member 3<br>OS=Homo sapiens<br>GN=CDHR3<br>PE=2 SV=1 - [CDHR3_HUMAN<br>E2/E3 hybrid ubiquitin-protein ligase<br>UBE2O       | 2.49  | 1 | 2  | 2  | 4  | 1.119 | 0.925 | 1.216 | 1.013 | 1.94  | 2.49  | 2  | 4  | 885  | 97.9  | 5.41  |
| Q9C0C9 | OS=Homo sapiens<br>GN=UBE2O<br>PE=1 SV=3 - [UBE2O_HUMAN]                                                                                            | 10.99 | 1 | 11 | 12 | 23 | 0.926 | 1.035 | 0.974 | 1.013 | 64.71 | 10.99 | 14 | 23 | 1292 | 141.2 | 5.12  |
| P56537 | Eukaryotic translation initiation factor 6<br>OS=Homo sapiens<br>GN=EIF6 PE=1 SV=1 - [IF6_HUMAN]                                                    | 26.94 | 1 | 4  | 4  | 26 | 1.136 | 0.970 | 1.208 | 1.013 | 59.77 | 26.94 | 7  | 26 | 245  | 26.6  | 4.68  |
| P18433 | Receptor-type tyrosine-protein phosphatase alpha<br>OS=Homo sapiens<br>GN=PTPRA<br>PE=1 SV=2 - [PTPRA_HUMAN<br>E3 ubiquitin-protein ligase<br>NEDD4 | 3.24  | 1 | 3  | 3  | 6  | 1.688 | 1.032 | 1.078 | 1.013 | 6.32  | 3.24  | 4  | 6  | 802  | 90.5  | 6.70  |
| P46934 | OS=Homo sapiens<br>GN=NEDD4<br>PE=1 SV=4 - [NEDD4_HUMAN]                                                                                            | 5.31  | 1 | 5  | 5  | 6  | 0.796 | 0.916 | 0.629 | 1.013 | 18.89 | 5.31  | 6  | 6  | 1319 | 149.0 | 6.58  |
| Q969R8 | Integrin-alpha FG-GAP repeat-containing protein 2<br>OS=Homo sapiens<br>GN=ITFG2<br>PE=1 SV=1 - [ITFG2_HUMAN]                                       | 6.71  | 1 | 2  | 2  | 3  | 1.867 | 1.302 | 1.519 | 1.013 | 3.36  | 6.71  | 2  | 3  | 447  | 49.3  | 5.22  |
| P42766 | 60S ribosomal protein L35<br>OS=Homo sapiens<br>GN=RPL35<br>PE=1 SV=2 - [RL35_HUMAN]                                                                | 43.09 | 1 | 8  | 10 | 69 | 0.846 | 0.697 | 0.840 | 1.014 | 85.06 | 43.09 | 15 | 69 | 123  | 14.5  | 11.05 |
| Q9BRZ2 | E3 ubiquitin-protein ligase TRIM56<br>OS=Homo sapiens<br>GN=TRIM56<br>PE=1 SV=3 - [TRIM56_HUMAN]                                                    | 21.19 | 2 | 13 | 13 | 41 | 0.882 | 0.990 | 1.045 | 1.014 | 73.56 | 21.19 | 21 | 41 | 755  | 81.4  | 7.74  |
| O75954 | Tetraspanin-9<br>OS=Homo sapiens<br>GN=TSPAN9<br>PE=1 SV=1 - [TSN9_HUMAN]                                                                           | 6.28  | 1 | 1  | 1  | 17 | 1.076 | 0.809 | 0.912 | 1.014 | 17.75 | 6.28  | 2  | 17 | 239  | 26.8  | 7.68  |



|         |                                                                                                                    |       |   |    |    |     |       |       |       |       |        |       |    |     |     |      |       |
|---------|--------------------------------------------------------------------------------------------------------------------|-------|---|----|----|-----|-------|-------|-------|-------|--------|-------|----|-----|-----|------|-------|
| O00399  | Dynactin subunit 6<br>OS=Homo sapiens<br>GN=DCTN6<br>PE=1 SV=1 - [DCTN6_HUMAN]                                     | 31.58 | 1 | 5  | 5  | 34  | 1.141 | 1.030 | 0.888 | 1.014 | 76.74  | 31.58 | 10 | 34  | 190 | 20.7 | 6.32  |
| P47712  | Cytosolic phospholipase A2<br>OS=Homo sapiens<br>GN=PLA2G4A<br>PE=1 SV=2 - [PA24A_HUMAN]                           | 8.68  | 1 | 7  | 7  | 16  | 0.974 | 0.906 | 0.931 | 1.014 | 34.13  | 8.68  | 9  | 16  | 749 | 85.2 | 5.38  |
| Q9LUK41 | Vacuolar protein sorting-associated protein 28 homolog<br>OS=Homo sapiens<br>GN=VPS28<br>PE=1 SV=1 - [VPS28_HUMAN] | 44.34 | 1 | 9  | 9  | 29  | 0.879 | 1.061 | 1.160 | 1.014 | 52.64  | 44.34 | 12 | 29  | 221 | 25.4 | 5.54  |
| P45974  | Ubiquitin carboxyl-terminal hydrolase 5<br>OS=Homo sapiens<br>GN=USP5<br>PE=1 SV=2 - [UBP5_HUMAN]                  | 35.08 | 1 | 26 | 26 | 117 | 1.172 | 1.102 | 1.263 | 1.014 | 278.66 | 35.08 | 43 | 117 | 858 | 95.7 | 5.03  |
| Q9Y2S7  | Polymerase delta-interacting protein 2<br>OS=Homo sapiens<br>GN=POLDIP2<br>PE=1 SV=1 - [PDIP2_HUMAN]               | 22.28 | 1 | 7  | 7  | 21  | 0.771 | 1.222 | 1.053 | 1.014 | 48.06  | 22.28 | 13 | 21  | 368 | 42.0 | 8.63  |
| P17405  | Sphingomyelin phosphodiesterase<br>OS=Homo sapiens<br>GN=SMPD1<br>PE=1 SV=4 - [ASM_HUMAN]                          | 6.04  | 1 | 3  | 3  | 4   | 0.529 | 1.163 | 0.960 | 1.014 | 7.30   | 6.04  | 4  | 4   | 629 | 69.7 | 7.28  |
| Q92572  | AP-3 complex subunit sigma-1<br>OS=Homo sapiens<br>GN=AP3S1<br>PE=1 SV=1 - [AP3S1_HUMAN]                           | 37.82 | 1 | 7  | 7  | 33  | 1.014 | 0.910 | 0.991 | 1.014 | 66.69  | 37.82 | 14 | 33  | 193 | 21.7 | 5.39  |
| Q98QA9  | Uncharacterized protein C17orf62<br>OS=Homo sapiens<br>GN=C17orf62<br>PE=1 SV=1 - [CQ062_HUMAN]                    | 16.04 | 1 | 3  | 3  | 11  | 1.058 | 0.766 | 0.767 | 1.015 | 29.31  | 16.04 | 5  | 11  | 187 | 20.8 | 6.80  |
| Q02878  | 60S ribosomal protein L6<br>OS=Homo sapiens<br>GN=RPL6<br>PE=1 SV=3 - [RL6_HUMAN]                                  | 44.44 | 1 | 17 | 17 | 188 | 0.903 | 1.023 | 0.993 | 1.015 | 373.81 | 44.44 | 33 | 188 | 288 | 32.7 | 10.58 |

|        |                                                                                                                 |       |   |    |    |    |       |       |       |       |        |       |    |    |     |       |      |
|--------|-----------------------------------------------------------------------------------------------------------------|-------|---|----|----|----|-------|-------|-------|-------|--------|-------|----|----|-----|-------|------|
| Q96L58 | Beta-1,3-galactosyltransferase 6<br>OS=Homo sapiens<br>GN=B3GALT6<br>PE=1 SV=2 - [B3GT6_HUMAN]                  | 6.99  | 1 | 2  | 2  | 8  | 0.673 | 0.973 | 1.368 | 1.015 | 18.99  | 6.99  | 3  | 8  | 329 | 37.1  | 9.66 |
| P51636 | Caveolin-2<br>OS=Homo sapiens<br>GN=CAV2<br>PE=1 SV=2 - [CAV2_HUMAN]                                            | 3.70  | 1 | 1  | 1  | 5  | 2.944 | 0.623 | 0.961 | 1.015 | 14.53  | 3.70  | 2  | 5  | 162 | 18.3  | 5.27 |
| Q9H0G5 | Nuclear speckle splicing regulatory protein 1<br>OS=Homo sapiens<br>GN=NSRP1<br>PE=1 SV=1 - [NSRP1_HUMAN]       | 1.08  | 1 | 1  | 1  | 3  | 0.696 | 1.144 |       | 1.015 | 9.14   | 1.08  | 1  | 3  | 558 | 66.4  | 8.84 |
| P31644 | Gamma-aminobutyric acid receptor subunit alpha-5<br>OS=Homo sapiens<br>GN=GABRA5<br>PE=1 SV=1 - [GBRAS_HUMAN]   | 3.46  | 2 | 2  | 2  | 2  | 0.872 | 0.978 | 0.936 | 1.015 | 3.80   | 3.46  | 2  | 2  | 462 | 52.1  | 9.16 |
| Q16774 | Guanylate kinase<br>OS=Homo sapiens<br>GN=GUK1<br>PE=1 SV=2 - [KGUA_HUMAN]                                      | 9.64  | 1 | 3  | 3  | 19 | 1.014 | 0.956 | 0.883 | 1.015 | 43.47  | 9.64  | 5  | 19 | 197 | 21.7  | 6.55 |
| Q6AZZ1 | E3 ubiquitin-protein ligase TRIM68<br>OS=Homo sapiens<br>GN=TRIM68<br>PE=1 SV=1 - [TRI68_HUMAN]                 | 7.01  | 1 | 2  | 2  | 4  | 0.738 | 0.479 | 0.777 | 1.015 | 6.75   | 7.01  | 2  | 4  | 485 | 56.2  | 6.48 |
| P78344 | Eukaryotic translation initiation factor 4 gamma 2<br>OS=Homo sapiens<br>GN=EIF4G2<br>PE=1 SV=1 - [IF4G2_HUMAN] | 29.11 | 1 | 22 | 23 | 77 | 0.857 | 0.944 | 0.928 | 1.015 | 174.60 | 29.11 | 35 | 77 | 907 | 102.3 | 7.14 |
| O75312 | Zinc finger protein ZPR1<br>OS=Homo sapiens<br>GN=ZPR1<br>PE=1 SV=1 - [ZPR1_HUMAN]                              | 16.99 | 1 | 7  | 7  | 35 | 0.778 | 0.946 | 1.092 | 1.015 | 91.41  | 16.99 | 14 | 35 | 459 | 50.9  | 4.73 |

|        |                                                                                                                             |       |   |    |    |     |       |       |       |       |        |       |    |     |      |       |      |
|--------|-----------------------------------------------------------------------------------------------------------------------------|-------|---|----|----|-----|-------|-------|-------|-------|--------|-------|----|-----|------|-------|------|
| O43184 | Disintegrin and metalloproteinase domain-containing protein 12<br>OS=Homo sapiens<br>GN=ADAM12<br>PE=1 SV=3 - [ADA12_HUMAN] | 0.88  | 1 | 1  | 1  | 1   | 0.871 | 2.046 | 1.921 | 1.015 | 2.19   | 0.88  | 1  | 1   | 909  | 99.5  | 8.40 |
| Q9H944 | Mediator of RNA polymerase II transcription subunit 20<br>OS=Homo sapiens<br>GN=MED20<br>PE=1 SV=1 - [MED20_HUMAN]          | 10.38 | 1 | 2  | 2  | 9   | 1.195 | 0.853 | 1.016 | 1.015 | 27.09  | 10.38 | 4  | 9   | 212  | 23.2  | 6.87 |
| Q9UPY5 | Cystine/glutamate transporter<br>OS=Homo sapiens<br>GN=SLC7A11<br>PE=1 SV=1 - [XCT_HUMAN]                                   | 4.79  | 1 | 2  | 2  | 7   | 1.084 | 0.086 | 0.370 | 1.015 | 15.50  | 4.79  | 3  | 7   | 501  | 55.4  | 9.19 |
| Q9C0J8 | pre-mRNA 3' end processing protein WDR33<br>OS=Homo sapiens<br>GN=WDR33<br>PE=1 SV=2 - [WDR33_HUMAN]                        | 3.74  | 1 | 4  | 4  | 8   | 1.189 | 1.750 | 1.476 | 1.016 | 13.43  | 3.74  | 6  | 8   | 1336 | 145.8 | 9.17 |
| Q9UBQ5 | Eukaryotic translation initiation factor 3 subunit K<br>OS=Homo sapiens<br>GN=EIF3K<br>PE=1 SV=1 - [EIF3K_HUMAN]            | 33.49 | 1 | 6  | 6  | 19  | 1.039 | 0.985 | 0.962 | 1.016 | 51.43  | 33.49 | 9  | 19  | 218  | 25.0  | 4.93 |
| P00966 | Argininosuccinate synthase<br>OS=Homo sapiens<br>GN=ASS1<br>PE=1 SV=2 - [ASSY_HUMAN]                                        | 43.93 | 1 | 18 | 18 | 116 | 0.638 | 0.772 | 0.865 | 1.016 | 215.82 | 43.93 | 27 | 116 | 412  | 46.5  | 8.02 |
| Q9H0N0 | Ras-related protein Rab-6C<br>OS=Homo sapiens<br>GN=RAB6C<br>PE=1 SV=2 - [RAB6C_HUMAN]                                      | 7.48  | 1 | 1  | 3  | 5   | 1.483 | 1.677 | 2.256 | 1.016 | 9.86   | 7.48  | 3  | 5   | 254  | 28.3  | 7.71 |
| Q99570 | Phosphoinositide 3-kinase regulatory subunit 4<br>OS=Homo sapiens<br>GN=PIK3R4<br>PE=1 SV=3 - [PI3R4_HUMAN]                 | 5.60  | 1 | 4  | 5  | 10  | 0.867 | 0.907 | 0.952 | 1.016 | 23.90  | 5.60  | 7  | 10  | 1358 | 153.0 | 7.17 |

|        |                                                                                                                    |       |   |    |    |     |       |       |       |       |        |       |    |     |      |       |      |
|--------|--------------------------------------------------------------------------------------------------------------------|-------|---|----|----|-----|-------|-------|-------|-------|--------|-------|----|-----|------|-------|------|
| Q5HY92 | Fidgetin<br>OS=Homo sapiens<br>GN=FIGN PE=1 SV=2 - [FIGN_HUMAN]                                                    | 1.19  | 1 | 1  | 1  | 1   | 1.137 | 0.956 | 0.953 | 1.016 | 0.00   | 1.19  | 1  | 1   | 759  | 82.1  | 6.71 |
| P53999 | Activated RNA polymerase II transcriptional coactivator p15<br>OS=Homo sapiens<br>GN=SUB1 PE=1 SV=3 - [TCP4_HUMAN] | 51.18 | 1 | 11 | 11 | 52  | 0.789 | 0.999 | 0.702 | 1.016 | 107.93 | 51.18 | 17 | 52  | 127  | 14.4  | 9.60 |
| Q8TER5 | Rho guanine nucleotide exchange factor 40<br>OS=Homo sapiens<br>GN=ARHGEF40 PE=1 SV=3 - [ARH40_HUMAN]              | 8.23  | 1 | 8  | 9  | 17  | 0.977 | 1.066 | 1.031 | 1.016 | 45.05  | 8.23  | 11 | 17  | 1519 | 164.6 | 6.15 |
| O15085 | Rho guanine nucleotide exchange factor 11<br>OS=Homo sapiens<br>GN=ARHGEF11 PE=1 SV=1 - [ARHGB_HUMAN]              | 8.54  | 1 | 9  | 10 | 19  | 0.990 | 0.830 | 1.035 | 1.016 | 41.89  | 8.54  | 13 | 19  | 1522 | 167.6 | 5.50 |
| P27695 | DNA-(apurinic or apyrimidinic site) lyase<br>OS=Homo sapiens<br>GN=APEX1 PE=1 SV=2 - [APEX1_HUMAN]                 | 42.14 | 1 | 16 | 16 | 104 | 1.095 | 1.117 | 0.924 | 1.016 | 310.44 | 42.14 | 25 | 104 | 318  | 35.5  | 8.12 |
| P22897 | Macrophage mannose receptor 1<br>OS=Homo sapiens<br>GN=MRC1 PE=1 SV=1 - [MRC1_HUMAN]                               | 1.51  | 1 | 1  | 2  | 2   | 0.415 | 1.125 | 1.544 | 1.016 | 2.63   | 1.51  | 2  | 2   | 1456 | 165.9 | 6.54 |
| O15347 | High mobility group protein B3<br>OS=Homo sapiens<br>GN=HMGB3 PE=1 SV=4 - [HMGB3_HUMAN]                            | 24.00 | 1 | 5  | 5  | 13  | 1.063 | 1.656 | 0.760 | 1.016 | 35.35  | 24.00 | 6  | 13  | 200  | 23.0  | 8.37 |
| P0C7M7 | Acyl-coenzyme A synthetase ACSM4, mitochondrial<br>OS=Homo sapiens<br>GN=ACSM4 PE=2 SV=1 - [ACSM4_HUMAN]           | 1.38  | 1 | 1  | 1  | 1   | 0.888 | 0.892 | 0.652 | 1.016 | 0.00   | 1.38  | 1  | 1   | 580  | 65.7  | 8.59 |
| Q12882 | Dihydropyrimidine dehydrogenase [NADP(+)]<br>OS=Homo sapiens<br>GN=DPYD PE=1 SV=2 - [DPYD_HUMAN]                   | 4.68  | 1 | 5  | 5  | 10  | 0.317 | 1.697 | 0.921 | 1.016 | 25.79  | 4.68  | 7  | 10  | 1025 | 111.3 | 7.05 |

|        |                                                                                                                |       |   |    |    |     |       |       |       |       |        |       |    |     |      |       |       |
|--------|----------------------------------------------------------------------------------------------------------------|-------|---|----|----|-----|-------|-------|-------|-------|--------|-------|----|-----|------|-------|-------|
| Q9H553 | Alpha-1,3/1,6-mannosyltransferase ALG2<br>OS=Homo sapiens<br>GN=ALG2 PE=1 SV=1 - [ALG2_HUMAN]                  | 21.88 | 1 | 8  | 8  | 21  | 1.086 | 1.000 | 1.001 | 1.016 | 51.11  | 21.88 | 13 | 21  | 416  | 47.1  | 7.05  |
| Q96P70 | Importin-9<br>OS=Homo sapiens<br>GN=IPO9 PE=1 SV=3 - [IPO9_HUMAN]                                              | 12.68 | 1 | 12 | 12 | 33  | 0.960 | 1.147 | 0.901 | 1.016 | 72.48  | 12.68 | 18 | 33  | 1041 | 115.9 | 4.81  |
| Q9H467 | CUE domain-containing protein 2<br>OS=Homo sapiens<br>GN=CUEDC2 PE=1 SV=1 - [CUED2_HUMAN]                      | 3.14  | 1 | 1  | 1  | 2   | 0.894 | 0.743 | 1.075 | 1.016 | 4.36   | 3.14  | 2  | 2   | 287  | 32.0  | 4.81  |
| Q8TCT9 | Minor histocompatibility antigen H13<br>OS=Homo sapiens<br>GN=HM13 PE=1 SV=1 - [HM13_HUMAN]                    | 15.38 | 1 | 6  | 6  | 45  | 0.857 | 0.640 | 0.706 | 1.016 | 109.43 | 15.38 | 10 | 45  | 377  | 41.5  | 6.43  |
| P62854 | 40S ribosomal protein S26<br>OS=Homo sapiens<br>GN=RPS26 PE=1 SV=3 - [RS26_HUMAN]                              | 26.96 | 2 | 3  | 3  | 20  | 0.859 | 0.785 | 0.764 | 1.017 | 40.89  | 26.96 | 4  | 20  | 115  | 13.0  | 11.00 |
| Q96N67 | Dedicator of cytokinesis protein 7<br>OS=Homo sapiens<br>GN=DOCK7 PE=1 SV=4 - [DOCK7_HUMAN]                    | 15.56 | 3 | 25 | 28 | 91  | 1.072 | 1.084 | 0.947 | 1.017 | 199.68 | 15.56 | 46 | 91  | 2140 | 242.4 | 6.80  |
| Q15758 | Neutral amino acid transporter B(0)<br>OS=Homo sapiens<br>GN=SLC1A5 PE=1 SV=2 - [AAAT_HUMAN]                   | 19.22 | 1 | 9  | 9  | 103 | 1.143 | 0.405 | 0.504 | 1.017 | 211.44 | 19.22 | 13 | 103 | 541  | 56.6  | 5.48  |
| Q8NBI6 | Xyloside xylosyltransferase 1<br>OS=Homo sapiens<br>GN=XXYLT1 PE=1 SV=1 - [XXLT1_HUMAN]                        | 7.38  | 1 | 2  | 2  | 3   | 0.964 | 0.967 | 0.736 | 1.017 | 9.23   | 7.38  | 3  | 3   | 393  | 43.8  | 8.13  |
| P51114 | Fragile X mental retardation syndrome-related protein 1<br>OS=Homo sapiens<br>GN=FXR1 PE=1 SV=3 - [FXR1_HUMAN] | 37.36 | 1 | 17 | 20 | 91  | 0.909 | 1.334 | 1.244 | 1.017 | 289.35 | 37.36 | 32 | 91  | 621  | 69.7  | 6.15  |

|        |                                                                                                                          |       |   |    |    |    |       |       |       |       |        |       |    |    |      |       |      |
|--------|--------------------------------------------------------------------------------------------------------------------------|-------|---|----|----|----|-------|-------|-------|-------|--------|-------|----|----|------|-------|------|
| Q5VWZ2 | Lysophospholipase-like protein 1 OS=Homo sapiens<br>GN=LYPLAL1<br>PE=1 SV=3 - [LYPL1_HUMAN]                              | 15.61 | 1 | 4  | 4  | 7  | 0.819 | 1.115 | 0.867 | 1.017 | 15.07  | 15.61 | 7  | 7  | 237  | 26.3  | 7.84 |
| Q9P0J0 | NADH dehydrogenase [ubiquinone] 1 alpha subcomplex subunit 13 OS=Homo sapiens<br>GN=NDUFA13<br>PE=1 SV=3 - [NDUAD_HUMAN] | 40.97 | 1 | 6  | 6  | 17 | 0.800 | 1.081 | 0.924 | 1.017 | 46.96  | 40.97 | 9  | 17 | 144  | 16.7  | 8.43 |
| Q9UL01 | Dermatan-sulfate epimerase OS=Homo sapiens<br>GN=DSE PE=1 SV=1 - [DSE_HUMAN]                                             | 2.82  | 1 | 3  | 3  | 9  | 0.669 | 0.956 | 1.045 | 1.017 | 20.73  | 2.82  | 4  | 9  | 958  | 109.7 | 8.09 |
| P17050 | Alpha-N-acetylgalactosaminidase OS=Homo sapiens<br>GN=NAGA<br>PE=1 SV=2 - [NAGAB_HUMAN]                                  | 9.98  | 1 | 4  | 4  | 10 | 1.018 | 0.929 | 0.649 | 1.017 | 22.84  | 9.98  | 7  | 10 | 411  | 46.5  | 5.19 |
| Q86XX4 | Extracellular matrix protein FRAS1 OS=Homo sapiens<br>GN=FRAS1<br>PE=1 SV=2 - [FRAS1_HUMAN]                              | 0.37  | 1 | 1  | 2  | 3  | 1.474 | 0.780 | 0.687 | 1.017 | 7.34   | 0.37  | 2  | 3  | 4008 | 442.9 | 5.57 |
| Q9NW15 | Anoctamin-10 OS=Homo sapiens<br>GN=ANO10<br>PE=1 SV=2 - [ANO10_HUMAN]                                                    | 13.18 | 2 | 10 | 10 | 33 | 1.039 | 1.022 | 0.888 | 1.017 | 74.61  | 13.18 | 14 | 33 | 660  | 76.3  | 7.40 |
| Q9UDY2 | Tight junction protein ZO-2 OS=Homo sapiens<br>GN=TJP2 PE=1 SV=2 - [ZO2_HUMAN]                                           | 16.97 | 1 | 16 | 18 | 64 | 0.797 | 1.797 | 2.280 | 1.017 | 145.25 | 16.97 | 29 | 64 | 1190 | 133.9 | 7.40 |
| Q14964 | Ras-related protein Rab-39A OS=Homo sapiens<br>GN=RAB39A<br>PE=2 SV=2 - [RB39A_HUMAN]                                    | 11.52 | 2 | 1  | 2  | 22 | 1.032 | 1.128 | 0.853 | 1.017 | 46.55  | 11.52 | 3  | 22 | 217  | 25.0  | 7.65 |
| Q9NYY8 | FAST kinase domain-containing protein 2 OS=Homo sapiens<br>GN=FASTKD2<br>PE=1 SV=1 - [FAKD2_HUMAN]                       | 1.27  | 1 | 1  | 1  | 2  | 0.768 | 0.559 | 0.831 | 1.017 | 3.60   | 1.27  | 2  | 2  | 710  | 81.4  | 8.05 |

|        |                                                                                                                                                                                                                                                  |       |   |    |    |     |       |       |       |       |        |       |    |     |      |       |      |
|--------|--------------------------------------------------------------------------------------------------------------------------------------------------------------------------------------------------------------------------------------------------|-------|---|----|----|-----|-------|-------|-------|-------|--------|-------|----|-----|------|-------|------|
| P24821 | Tenascin<br>OS=Homo<br>sapiens<br>GN=TNC PE=1<br>SV=3 -<br>[TENA_HUMAN]                                                                                                                                                                          | 13.77 | 1 | 20 | 20 | 45  | 0.322 | 1.106 | 1.391 | 1.017 | 111.82 | 13.77 | 28 | 45  | 2201 | 240.7 | 4.89 |
| Q13951 | Core-binding<br>factor subunit<br>beta<br>OS=Homo<br>sapiens<br>GN=CBFB<br>PE=1 SV=2 -<br>[PEBB_HUMAN]                                                                                                                                           | 9.34  | 1 | 2  | 2  | 9   | 0.756 | 1.051 | 0.656 | 1.017 | 24.77  | 9.34  | 3  | 9   | 182  | 21.5  | 6.60 |
| Q8WXX0 | Dynein heavy<br>chain 7,<br>axonemal<br>OS=Homo<br>sapiens<br>GN=DNAH7<br>PE=1 SV=2 -<br>[DYH7_HUMAN]                                                                                                                                            | 0.45  | 1 | 2  | 2  | 4   | 0.844 | 0.632 | 0.503 | 1.018 | 8.33   | 0.45  | 2  | 4   | 4024 | 460.9 | 6.00 |
| Q86U28 | Iron-sulfur<br>cluster<br>assembly 2<br>homolog,<br>mitochondrial<br>OS=Homo<br>sapiens<br>GN=ISCA2<br>PE=1 SV=2 -<br>[ISCA2_HUMAN<br>PR domain zinc<br>finger protein<br>16 OS=Homo<br>sapiens<br>GN=PRDM16<br>PE=1 SV=3 -<br>[PRD16_HUMAN<br>] | 7.79  | 1 | 1  | 1  | 2   | 0.687 | 0.949 | 0.595 | 1.018 | 3.05   | 7.79  | 2  | 2   | 154  | 16.5  | 5.25 |
| Q9HAZ2 | Thioredoxin<br>domain-<br>containing<br>protein 17<br>OS=Homo<br>sapiens<br>GN=TXNDC17<br>PE=1 SV=1 -<br>[TXD17_HUMAN<br>]                                                                                                                       | 0.71  | 1 | 1  | 1  | 4   | 1.244 | 1.000 | 1.412 | 1.018 | 8.78   | 0.71  | 1  | 4   | 1276 | 140.2 | 6.21 |
| Q9BRA2 | ATP-binding<br>cassette sub-<br>family F<br>member 1<br>OS=Homo<br>sapiens<br>GN=ABCF1<br>PE=1 SV=2 -<br>[ABCF1_HUMAN<br>]                                                                                                                       | 18.70 | 1 | 2  | 2  | 41  | 0.904 | 1.034 | 1.215 | 1.018 | 157.21 | 18.70 | 4  | 41  | 123  | 13.9  | 5.52 |
| Q8NE71 | Calpain-2<br>catalytic<br>subunit<br>OS=Homo<br>sapiens<br>GN=CAPN2<br>PE=1 SV=6 -<br>[CAN2_HUMAN]                                                                                                                                               | 32.19 | 3 | 23 | 26 | 91  | 0.924 | 0.873 | 0.981 | 1.018 | 231.21 | 32.19 | 43 | 91  | 845  | 95.9  | 6.80 |
| P17655 | Amyloid-like<br>protein 2<br>OS=Homo<br>sapiens<br>GN=APLP2<br>PE=1 SV=2 -<br>[APLP2_HUMAN<br>]                                                                                                                                                  | 56.29 | 1 | 33 | 33 | 263 | 1.184 | 0.993 | 1.085 | 1.018 | 828.87 | 56.29 | 50 | 263 | 700  | 79.9  | 4.98 |
| Q06481 |                                                                                                                                                                                                                                                  | 16.12 | 1 | 9  | 11 | 28  | 0.785 | 0.961 | 1.244 | 1.018 | 70.39  | 16.12 | 18 | 28  | 763  | 86.9  | 4.79 |

|        |                                                                                                                                                                                                             |       |   |    |    |    |       |       |       |       |        |       |    |    |      |       |      |
|--------|-------------------------------------------------------------------------------------------------------------------------------------------------------------------------------------------------------------|-------|---|----|----|----|-------|-------|-------|-------|--------|-------|----|----|------|-------|------|
| P46019 | Phosphorylase<br>b kinase<br>regulatory<br>subunit alpha,<br>liver isoform<br>OS=Homo<br>sapiens<br>GN=PHKA2<br>PE=1 SV=1 -<br>[KPB2_HUMAN]                                                                 | 2.59  | 1 | 2  | 3  | 3  | 1.337 | 0.825 | 1.054 | 1.018 | 7.65   | 2.59  | 3  | 3  | 1235 | 138.3 | 6.44 |
| Q9BW61 | DET1- and<br>DDB1-<br>associated<br>protein 1<br>OS=Homo<br>sapiens<br>GN=DDA1<br>PE=1 SV=1 -<br>[DDA1_HUMAN]                                                                                               | 28.43 | 1 | 4  | 4  | 12 | 1.017 | 1.145 | 1.139 | 1.018 | 22.91  | 28.43 | 7  | 12 | 102  | 11.8  | 8.68 |
| Q8TEW0 | Partitioning<br>defective 3<br>homolog<br>OS=Homo<br>sapiens<br>GN=PARD3<br>PE=1 SV=2 -<br>[PARD3_HUMAN<br>]                                                                                                | 4.72  | 1 | 6  | 7  | 13 | 1.144 | 1.238 | 1.301 | 1.018 | 29.35  | 4.72  | 9  | 13 | 1356 | 151.3 | 7.68 |
| Q9BXS5 | AP-1 complex<br>subunit mu-1<br>OS=Homo<br>sapiens<br>GN=AP1M1<br>PE=1 SV=3 -<br>[AP1M1_HUMAN<br>N]                                                                                                         | 44.44 | 2 | 15 | 15 | 58 | 1.083 | 0.799 | 0.975 | 1.019 | 125.83 | 44.44 | 21 | 58 | 423  | 48.6  | 7.30 |
| P46091 | G-protein<br>coupled<br>receptor 1<br>OS=Homo<br>sapiens<br>GN=GPR1<br>PE=1 SV=2 -<br>[GPR1_HUMAN]                                                                                                          | 2.82  | 1 | 1  | 1  | 1  | 0.673 | 0.927 | 1.101 | 1.019 | 0.00   | 2.82  | 1  | 1  | 355  | 41.4  | 7.40 |
| O43526 | Potassium<br>voltage-gated<br>channel<br>subfamily KQT<br>member 2<br>OS=Homo<br>sapiens<br>GN=KCNQ2<br>PE=1 SV=2 -<br>[KCNQ2_HUMAN<br>N]                                                                   | 2.64  | 1 | 2  | 2  | 3  | 0.912 | 0.861 | 0.946 | 1.019 | 2.28   | 2.64  | 2  | 3  | 872  | 95.8  | 9.23 |
| Q96SY0 | von Willebrand<br>factor A<br>domain-<br>containing<br>protein 9<br>OS=Homo<br>sapiens<br>GN=VWA9<br>PE=1 SV=2 -<br>[VWA9_HUMAN<br>Transmembran<br>e and coiled-<br>coil domain-<br>containing<br>protein 1 | 4.83  | 1 | 1  | 1  | 5  | 1.318 | 0.841 | 0.695 | 1.019 | 6.06   | 4.83  | 2  | 5  | 518  | 57.4  | 5.12 |
| Q9UM00 | OS=Homo<br>sapiens<br>GN=TMCO1<br>PE=1 SV=1 -<br>[TMCO1_HUMAN<br>N]                                                                                                                                         | 16.49 | 1 | 3  | 4  | 6  | 1.235 | 0.874 | 1.037 | 1.019 | 10.66  | 16.49 | 5  | 6  | 188  | 21.2  | 9.74 |



|        |                                                                                                                 |       |   |    |    |    |       |       |       |       |        |       |    |    |     |      |      |
|--------|-----------------------------------------------------------------------------------------------------------------|-------|---|----|----|----|-------|-------|-------|-------|--------|-------|----|----|-----|------|------|
| O00483 | Cytochrome c oxidase subunit NDUFA4<br>OS=Homo sapiens<br>GN=NDUFA4<br>PE=1 SV=1 - [NDUA4_HUMAN]                | 43.21 | 1 | 4  | 4  | 26 | 0.832 | 0.890 | 0.732 | 1.019 | 67.10  | 43.21 | 6  | 26 | 81  | 9.4  | 9.38 |
| Q96ST2 | Protein IWS1 homolog<br>OS=Homo sapiens<br>GN=IWS1<br>PE=1 SV=2 - [IWS1_HUMAN]                                  | 9.04  | 1 | 6  | 7  | 19 | 0.981 | 0.832 | 0.912 | 1.019 | 26.69  | 9.04  | 10 | 19 | 819 | 91.9 | 4.69 |
| P56937 | 3-keto-steroid reductase<br>OS=Homo sapiens<br>GN=HSD17B7<br>PE=1 SV=1 - [DHB7_HUMAN]                           | 4.40  | 1 | 1  | 2  | 2  | 1.027 | 0.903 | 1.034 | 1.019 | 1.66   | 4.40  | 2  | 2  | 341 | 38.2 | 8.10 |
| Q9BV20 | Methylthioribose-1-phosphate isomerase<br>OS=Homo sapiens<br>GN=MRI1<br>PE=1 SV=1 - [MTNA_HUMAN]                | 29.81 | 1 | 7  | 7  | 17 | 1.291 | 0.831 | 1.244 | 1.019 | 37.00  | 29.81 | 11 | 17 | 369 | 39.1 | 6.30 |
| Q96HY6 | DDRKG domain-containing protein 1<br>OS=Homo sapiens<br>GN=DDRKG1<br>PE=1 SV=2 - [DDRKG_HUMAN]                  | 29.30 | 1 | 7  | 7  | 41 | 0.887 | 0.799 | 0.807 | 1.019 | 119.77 | 29.30 | 12 | 41 | 314 | 35.6 | 5.12 |
| Q9HA65 | TBC1 domain family member 17<br>OS=Homo sapiens<br>GN=TBC1D17<br>PE=1 SV=2 - [TBC17_HUMAN]                      | 10.65 | 1 | 7  | 7  | 25 | 1.052 | 1.031 | 0.917 | 1.019 | 51.92  | 10.65 | 14 | 25 | 648 | 72.7 | 5.19 |
| Q8WVX3 | Uncharacterized protein C4orf3<br>OS=Homo sapiens<br>GN=C4orf3<br>PE=1 SV=2 - [CD003_HUMAN]                     | 24.24 | 1 | 1  | 1  | 4  | 1.212 | 0.749 | 0.897 | 1.019 | 3.15   | 24.24 | 1  | 4  | 66  | 7.6  | 5.29 |
| Q14696 | LDLR chaperone MESD<br>OS=Homo sapiens<br>GN=MESDC2<br>PE=1 SV=2 - [MESD_HUMAN]                                 | 33.76 | 1 | 7  | 7  | 18 | 0.981 | 0.908 | 0.779 | 1.020 | 55.60  | 33.76 | 10 | 18 | 234 | 26.1 | 7.78 |
| Q9Y3F4 | Serine-threonine kinase receptor-associated protein<br>OS=Homo sapiens<br>GN=STRAP<br>PE=1 SV=1 - [STRAP_HUMAN] | 68.57 | 1 | 20 | 20 | 81 | 0.971 | 0.957 | 1.113 | 1.020 | 239.31 | 68.57 | 31 | 81 | 350 | 38.4 | 5.12 |

|        |                                                                                                                          |       |   |    |    |     |       |       |       |       |         |       |    |     |      |       |      |
|--------|--------------------------------------------------------------------------------------------------------------------------|-------|---|----|----|-----|-------|-------|-------|-------|---------|-------|----|-----|------|-------|------|
| Q9C0D6 | FH2 domain-containing protein 1<br>OS=Homo sapiens<br>GN=FHDC1<br>PE=1 SV=2 - [FHDC1_HUMAN]                              | 1.05  | 1 | 1  | 2  | 6   | 0.804 | 0.849 | 1.024 | 1.020 | 11.00   | 1.05  | 2  | 6   | 1143 | 124.7 | 9.03 |
| P13164 | Interferon-induced transmembrane protein 1<br>OS=Homo sapiens<br>GN=IFITM1<br>PE=1 SV=3 - [IFM1_HUMAN]                   | 13.60 | 3 | 2  | 2  | 12  | 2.232 | 0.550 | 0.509 | 1.020 | 48.90   | 13.60 | 3  | 12  | 125  | 14.0  | 7.93 |
| P11413 | Glucose-6-phosphate 1-dehydrogenase<br>OS=Homo sapiens<br>GN=G6PD<br>PE=1 SV=4 - [G6PD_HUMAN]                            | 55.53 | 1 | 32 | 32 | 475 | 1.434 | 0.644 | 0.823 | 1.020 | 1255.64 | 55.53 | 58 | 475 | 515  | 59.2  | 6.84 |
| Q8NG68 | Tubulin--tyrosine ligase<br>OS=Homo sapiens<br>GN=TTL PE=1 SV=2 - [TTL_HUMAN]                                            | 3.98  | 1 | 1  | 1  | 2   | 1.201 | 0.834 | 0.765 | 1.020 | 4.70    | 3.98  | 2  | 2   | 377  | 43.2  | 6.74 |
| Q9UNZ2 | NSFL1 cofactor p47<br>OS=Homo sapiens<br>GN=NSFL1C<br>PE=1 SV=2 - [NSF1C_HUMAN]                                          | 48.11 | 1 | 16 | 16 | 66  | 1.017 | 1.123 | 1.185 | 1.020 | 171.69  | 48.11 | 26 | 66  | 370  | 40.5  | 5.10 |
| O95456 | Proteasome assembly chaperone 1<br>OS=Homo sapiens<br>GN=PSMG1<br>PE=1 SV=1 - [PSMG1_HUMAN]                              | 4.86  | 1 | 1  | 1  | 5   | 0.742 | 0.801 | 0.775 | 1.020 | 12.53   | 4.86  | 2  | 5   | 288  | 32.8  | 7.17 |
| Q5TH69 | Brefeldin A-inhibited guanine nucleotide-exchange protein 3<br>OS=Homo sapiens<br>GN=ARFGEF3<br>PE=1 SV=3 - [BIG3_HUMAN] | 1.98  | 1 | 3  | 3  | 4   | 1.320 | 0.672 | 0.708 | 1.020 | 3.78    | 1.98  | 3  | 4   | 2177 | 240.5 | 5.82 |
| O43665 | Regulator of G-protein signaling 10<br>OS=Homo sapiens<br>GN=RGS10<br>PE=1 SV=2 - [RGS10_HUMAN]                          | 21.97 | 1 | 3  | 3  | 5   | 0.929 | 0.747 | 0.560 | 1.020 | 10.89   | 21.97 | 3  | 5   | 173  | 20.2  | 5.49 |
| Q9NPR9 | Protein GPR108<br>OS=Homo sapiens<br>GN=GPR108<br>PE=2 SV=3 - [GP108_HUMAN]                                              | 4.60  | 1 | 2  | 2  | 5   | 0.522 | 0.280 | 0.438 | 1.020 | 12.69   | 4.60  | 3  | 5   | 543  | 60.6  | 8.69 |

|        |                                                                                                                   |       |   |    |    |    |       |       |       |       |        |       |    |    |      |       |      |
|--------|-------------------------------------------------------------------------------------------------------------------|-------|---|----|----|----|-------|-------|-------|-------|--------|-------|----|----|------|-------|------|
| Q6NWY1 | 3-hydroxyisobutyryl-CoA hydrolase, mitochondrial<br>OS=Homo sapiens<br>GN=HIBCH<br>PE=1 SV=2 - [HIBCH_HUMAN]      | 33.42 | 1 | 11 | 11 | 49 | 1.009 | 1.446 | 0.749 | 1.020 | 103.00 | 33.42 | 17 | 49 | 386  | 43.5  | 8.19 |
| O00748 | Cocaine esterase<br>OS=Homo sapiens<br>GN=CES2<br>PE=1 SV=1 - [EST2_HUMAN]                                        | 4.65  | 1 | 2  | 2  | 10 | 1.045 | 1.064 | 1.367 | 1.020 | 25.02  | 4.65  | 3  | 10 | 559  | 61.8  | 6.10 |
| Q8N475 | Follistatin-related protein 5<br>OS=Homo sapiens<br>GN=FSTL5<br>PE=2 SV=2 - [FSTL5_HUMAN]                         | 2.48  | 1 | 1  | 1  | 1  | 0.963 | 1.141 | 1.125 | 1.020 | 0.00   | 2.48  | 1  | 1  | 847  | 95.7  | 5.95 |
| Q969N2 | GPI transamidase component PIG-T<br>OS=Homo sapiens<br>GN=PIGT PE=1 SV=1 - [PIGT_HUMAN]                           | 17.13 | 1 | 9  | 9  | 25 | 1.005 | 0.784 | 0.899 | 1.020 | 73.32  | 17.13 | 15 | 25 | 578  | 65.7  | 8.38 |
| Q86WG5 | Myotubularin-related protein 13<br>OS=Homo sapiens<br>GN=SBF2<br>PE=1 SV=1 - [MTMRD_HUMAN]                        | 2.27  | 1 | 3  | 3  | 13 | 0.849 | 1.469 | 1.140 | 1.020 | 27.23  | 2.27  | 6  | 13 | 1849 | 208.3 | 7.06 |
| Q495W5 | Alpha-(1,3)-fucosyltransferase 11<br>OS=Homo sapiens<br>GN=FUT11<br>PE=1 SV=1 - [FUT11_HUMAN]                     | 9.35  | 1 | 3  | 3  | 4  | 1.330 | 1.187 | 0.682 | 1.020 | 11.28  | 9.35  | 4  | 4  | 492  | 55.8  | 5.94 |
| O95166 | Gamma-aminobutyric acid receptor-associated protein<br>OS=Homo sapiens<br>GN=GABARAP<br>PE=1 SV=1 - [GBRAP_HUMAN] | 24.79 | 1 | 2  | 4  | 7  | 0.933 | 1.246 | 1.054 | 1.020 | 11.82  | 24.79 | 5  | 7  | 117  | 13.9  | 8.79 |
| P17535 | Transcription factor jun-D<br>OS=Homo sapiens<br>GN=JUND PE=1 SV=3 - [JUND_HUMAN]                                 | 6.34  | 1 | 1  | 2  | 5  | 0.724 | 1.284 | 0.597 | 1.021 | 13.89  | 6.34  | 2  | 5  | 347  | 35.2  | 7.37 |
| P53602 | Diphosphomevalonate decarboxylase<br>OS=Homo sapiens<br>GN=MVD PE=1 SV=1 - [MVD1_HUMAN]                           | 21.50 | 1 | 7  | 7  | 30 | 1.028 | 0.667 | 1.214 | 1.021 | 80.55  | 21.50 | 13 | 30 | 400  | 43.4  | 7.23 |

|        |                                                                                                                                                        |       |   |    |    |    |       |       |       |       |       |       |    |    |      |       |      |
|--------|--------------------------------------------------------------------------------------------------------------------------------------------------------|-------|---|----|----|----|-------|-------|-------|-------|-------|-------|----|----|------|-------|------|
| Q8IUF8 | Bifunctional<br>lysine-specific<br>demethylase<br>and histidyl-<br>hydroxylase<br>MINA<br>OS=Homo<br>sapiens<br>GN=MINA<br>PE=1 SV=1 -<br>[MINA_HUMAN] | 6.02  | 1 | 2  | 3  | 4  | 1.062 | 0.659 | 0.581 | 1.021 | 10.00 | 6.02  | 4  | 4  | 465  | 52.8  | 6.70 |
| Q9BRK4 | Leucine zipper<br>putative tumor<br>suppressor 2<br>OS=Homo<br>sapiens<br>GN=LZTS2<br>PE=1 SV=2 -<br>[LZTS2_HUMAN<br>]                                 | 2.99  | 1 | 2  | 2  | 2  | 1.069 | 0.986 | 0.917 | 1.021 | 0.00  | 2.99  | 2  | 2  | 669  | 72.7  | 6.51 |
| Q86T82 | Ubiquitin<br>carboxyl-<br>terminal<br>hydrolase 37<br>OS=Homo<br>sapiens<br>GN=USP37<br>PE=1 SV=2 -<br>[UBP37_HUMAN<br>]                               | 0.92  | 1 | 1  | 1  | 1  | 1.136 | 0.334 | 0.440 | 1.021 | 2.85  | 0.92  | 1  | 1  | 979  | 110.1 | 6.20 |
| Q155Q3 | Dixin OS=Homo<br>sapiens<br>GN=DIXDC1<br>PE=1 SV=2 -<br>[DIXC1_HUMAN<br>]                                                                              | 1.90  | 3 | 1  | 2  | 6  | 1.036 | 0.723 | 0.830 | 1.021 | 12.90 | 1.90  | 2  | 6  | 683  | 77.4  | 6.24 |
| Q9HCH5 | Synaptotagmin-<br>like protein 2<br>OS=Homo<br>sapiens<br>GN=SYTL2<br>PE=1 SV=3 -<br>[SYTL2_HUMAN<br>]                                                 | 3.53  | 1 | 3  | 3  | 5  | 0.595 | 1.521 | 1.680 | 1.021 | 10.66 | 3.53  | 4  | 5  | 934  | 104.9 | 8.00 |
| Q95476 | CTD nuclear<br>envelope<br>phosphatase 1<br>OS=Homo<br>sapiens<br>GN=CTDNEP1<br>PE=1 SV=2 -<br>[CNEP1_HUMAN<br>]                                       | 11.48 | 1 | 3  | 3  | 5  | 0.976 | 0.938 | 0.736 | 1.022 | 8.67  | 11.48 | 4  | 5  | 244  | 28.4  | 9.76 |
| Q9Y6D5 | Brefeldin A-<br>inhibited<br>guanine<br>nucleotide-<br>exchange<br>protein 2<br>OS=Homo<br>sapiens<br>GN=ARFGEF2<br>PE=1 SV=3 -<br>[BIG2_HUMAN]        | 10.03 | 1 | 13 | 17 | 32 | 1.042 | 0.861 | 0.824 | 1.022 | 66.41 | 10.03 | 23 | 32 | 1785 | 201.9 | 6.33 |
| Q7Z392 | Trafficking<br>protein particle<br>complex<br>subunit 11<br>OS=Homo<br>sapiens<br>GN=TRAPPC11<br>PE=1 SV=2 -<br>[TPC11_HUMAN<br>]                      | 6.53  | 1 | 6  | 6  | 14 | 1.071 | 0.805 | 0.926 | 1.022 | 38.19 | 6.53  | 8  | 14 | 1133 | 128.8 | 7.14 |

|        |                                                                                                                                        |       |   |   |   |    |       |       |       |       |        |       |    |    |      |       |      |
|--------|----------------------------------------------------------------------------------------------------------------------------------------|-------|---|---|---|----|-------|-------|-------|-------|--------|-------|----|----|------|-------|------|
| Q8WU76 | Sec1 family domain-containing protein 2<br>OS=Homo sapiens<br>GN=SCFD2<br>PE=1 SV=2 - [SCFD2_HUMAN]                                    | 7.16  | 1 | 4 | 4 | 17 | 0.832 | 0.929 | 1.083 | 1.022 | 46.34  | 7.16  | 7  | 17 | 684  | 75.1  | 6.68 |
| Q9UK76 | Hematological and neurological expressed 1 protein<br>OS=Homo sapiens<br>GN=HN1 PE=1 SV=3 - [HN1_HUMAN]                                | 37.66 | 1 | 5 | 5 | 46 | 0.820 | 1.129 | 0.913 | 1.022 | 114.13 | 37.66 | 9  | 46 | 154  | 16.0  | 5.60 |
| P50336 | Protoporphyrin ogen oxidase<br>OS=Homo sapiens<br>GN=PPOX<br>PE=1 SV=1 - [PPOX_HUMAN]                                                  | 11.11 | 1 | 4 | 4 | 11 | 1.403 | 1.576 | 1.212 | 1.022 | 29.43  | 11.11 | 7  | 11 | 477  | 50.7  | 8.16 |
| O95751 | Protein LDOC1<br>OS=Homo sapiens<br>GN=LDOC1<br>PE=1 SV=1 - [LDOC1_HUMAN]                                                              | 12.33 | 1 | 1 | 1 | 1  | 1.076 | 1.105 | 1.048 | 1.022 | 0.00   | 12.33 | 1  | 1  | 146  | 17.0  | 4.25 |
| Q9Y210 | Short transient receptor potential channel 6<br>OS=Homo sapiens<br>GN=TRPC6<br>PE=1 SV=1 - [TRPC6_HUMAN]                               | 2.36  | 1 | 2 | 2 | 4  | 0.395 | 0.811 | 0.628 | 1.022 | 13.57  | 2.36  | 2  | 4  | 931  | 106.3 | 6.67 |
| Q13043 | Serine/threonine-protein kinase 4<br>OS=Homo sapiens<br>GN=STK4<br>PE=1 SV=2 - [STK4_HUMAN]                                            | 20.74 | 1 | 7 | 8 | 15 | 0.981 | 1.088 | 1.011 | 1.022 | 35.59  | 20.74 | 10 | 15 | 487  | 55.6  | 5.07 |
| Q9NP81 | Serine--tRNA ligase, mitochondrial<br>OS=Homo sapiens<br>GN=SARS2<br>PE=1 SV=1 - [SYSM_HUMAN]                                          | 15.25 | 1 | 8 | 8 | 28 | 0.929 | 1.345 | 1.083 | 1.023 | 63.80  | 15.25 | 15 | 28 | 518  | 58.2  | 8.13 |
| Q96P48 | Arf-GAP with Rho-GAP domain, ANK repeat and PH domain-containing protein 1<br>OS=Homo sapiens<br>GN=ARAP1<br>PE=1 SV=3 - [ARAP1_HUMAN] | 3.79  | 3 | 6 | 7 | 13 | 1.085 | 1.310 | 1.074 | 1.023 | 24.69  | 3.79  | 10 | 13 | 1450 | 162.1 | 6.23 |

|        |                                                                                                                               |       |   |    |    |    |       |       |       |       |       |       |    |    |      |       |       |
|--------|-------------------------------------------------------------------------------------------------------------------------------|-------|---|----|----|----|-------|-------|-------|-------|-------|-------|----|----|------|-------|-------|
| Q969V5 | Mitochondrial ubiquitin ligase activator of NFKB 1<br>OS=Homo sapiens<br>GN=MULL1<br>PE=1 SV=1 - [MULL1_HUMAN]                | 9.66  | 1 | 4  | 4  | 7  | 1.145 | 0.865 | 0.964 | 1.023 | 19.15 | 9.66  | 6  | 7  | 352  | 39.8  | 8.13  |
| Q8N129 | Protein canopy homolog 4<br>OS=Homo sapiens<br>GN=CNPY4<br>PE=2 SV=1 - [CNPY4_HUMAN]                                          | 22.98 | 1 | 5  | 5  | 19 | 1.101 | 0.938 | 1.150 | 1.023 | 53.10 | 22.98 | 10 | 19 | 248  | 28.3  | 4.64  |
| Q8N335 | Glycerol-3-phosphate dehydrogenase 1-like protein<br>OS=Homo sapiens<br>GN=GPD1L<br>PE=1 SV=1 - [GPD1L_HUMAN]                 | 27.92 | 2 | 11 | 11 | 34 | 1.000 | 1.207 | 1.013 | 1.023 | 71.10 | 27.92 | 19 | 34 | 351  | 38.4  | 7.02  |
| A6NHQ2 | rRNA/tRNA 2'-O-methyltransferase fibrillar-like protein 1<br>OS=Homo sapiens<br>GN=FBLL1<br>PE=3 SV=1 - [FBLL1_HUMAN]         | 13.51 | 1 | 2  | 3  | 7  | 1.317 | 1.079 | 0.870 | 1.023 | 17.13 | 13.51 | 4  | 7  | 333  | 34.7  | 10.33 |
| Q96T58 | Mx2-interacting protein<br>OS=Homo sapiens<br>GN=SPEN<br>PE=1 SV=1 - [MINT_HUMAN]                                             | 1.47  | 1 | 2  | 4  | 10 | 0.742 | 0.847 | 0.982 | 1.023 | 7.37  | 1.47  | 4  | 10 | 3664 | 402.0 | 7.64  |
| Q96PD2 | Discoidin, CUB and LCCL domain-containing protein 2<br>OS=Homo sapiens<br>GN=DCBLD2<br>PE=1 SV=1 - [DCBD2_HUMAN]              | 9.03  | 1 | 4  | 5  | 8  | 0.602 | 0.955 | 1.019 | 1.023 | 16.48 | 9.03  | 6  | 8  | 775  | 85.0  | 7.17  |
| Q8N1F1 | Putative uncharacterized protein LRRC75A-AS1, mitochondrial<br>OS=Homo sapiens<br>GN=LRRC75A-AS1<br>PE=5 SV=1 - [CIAS1_HUMAN] | 12.31 | 1 | 1  | 1  | 1  | 1.015 | 2.286 | 2.399 | 1.023 | 2.33  | 12.31 | 1  | 1  | 130  | 13.8  | 9.26  |
| Q92575 | UBX domain-containing protein 4<br>OS=Homo sapiens<br>GN=UBXN4<br>PE=1 SV=2 - [UBXN4_HUMAN]                                   | 17.52 | 1 | 9  | 9  | 40 | 0.826 | 1.085 | 0.809 | 1.023 | 87.46 | 17.52 | 14 | 40 | 508  | 56.7  | 6.38  |

|        |                                                                                                              |       |   |    |    |     |       |       |       |       |        |       |    |     |      |       |      |
|--------|--------------------------------------------------------------------------------------------------------------|-------|---|----|----|-----|-------|-------|-------|-------|--------|-------|----|-----|------|-------|------|
| Q95819 | Mitogen-activated protein kinase kinase 4<br>OS=Homo sapiens<br>GN=MAP4K4<br>PE=1 SV=2 - [M4K4_HUMAN]        | 16.71 | 2 | 10 | 17 | 66  | 0.907 | 1.218 | 1.106 | 1.023 | 144.46 | 16.71 | 29 | 66  | 1239 | 142.0 | 7.46 |
| Q7Z5L7 | Podocan<br>OS=Homo sapiens<br>GN=PODN<br>PE=1 SV=2 - [PODN_HUMAN]                                            | 9.46  | 1 | 5  | 6  | 14  | 1.688 | 0.854 | 0.723 | 1.023 | 28.18  | 9.46  | 9  | 14  | 613  | 68.9  | 6.99 |
| Q5TAQ9 | DDB1- and CUL4-associated factor 8<br>OS=Homo sapiens<br>GN=DCAF8<br>PE=1 SV=1 - [DCAF8_HUMAN]               | 12.06 | 1 | 6  | 6  | 18  | 0.631 | 1.183 | 0.955 | 1.023 | 54.90  | 12.06 | 10 | 18  | 597  | 66.8  | 5.39 |
| Q86W11 | Fibrocystin-L<br>OS=Homo sapiens<br>GN=PKHD1L1<br>PE=2 SV=2 - [PKHL1_HUMAN]                                  | 0.73  | 1 | 1  | 1  | 1   | 0.949 | 0.869 | 1.489 | 1.023 | 2.62   | 0.73  | 1  | 1   | 4243 | 465.4 | 6.11 |
| Q9BZL4 | Protein phosphatase 1 regulatory subunit 12C<br>OS=Homo sapiens<br>GN=PPP1R12C<br>PE=1 SV=1 - [PP12C_HUMAN]  | 37.98 | 1 | 25 | 25 | 89  | 1.160 | 1.229 | 1.386 | 1.023 | 194.71 | 37.98 | 43 | 89  | 782  | 84.8  | 5.57 |
| Q96T88 | E3 ubiquitin-protein ligase UHRF1<br>OS=Homo sapiens<br>GN=UHRF1<br>PE=1 SV=1 - [UHRF1_HUMAN]                | 1.77  | 1 | 1  | 1  | 1   | 1.437 | 0.570 | 0.983 | 1.023 | 2.03   | 1.77  | 1  | 1   | 793  | 89.8  | 7.56 |
| Q9UM47 | Neurogenic locus notch homolog protein 3<br>OS=Homo sapiens<br>GN=NOTCH3<br>PE=1 SV=2 - [NOTC3_HUMAN]        | 1.46  | 1 | 1  | 4  | 10  | 0.953 | 0.954 | 1.012 | 1.024 | 31.40  | 1.46  | 6  | 10  | 2321 | 243.5 | 5.39 |
| Q9Y5S2 | Serine/threonine-protein kinase MRCK beta<br>OS=Homo sapiens<br>GN=CDC42BPB<br>PE=1 SV=2 - [MRCKB_HUMAN]     | 22.97 | 1 | 33 | 40 | 100 | 1.076 | 1.121 | 1.151 | 1.024 | 242.26 | 22.97 | 62 | 100 | 1711 | 194.2 | 6.37 |
| P0DI81 | Trafficking protein particle complex subunit 2<br>OS=Homo sapiens<br>GN=TRAPPC2<br>PE=1 SV=1 - [TPC2A_HUMAN] | 15.00 | 1 | 2  | 2  | 7   | 1.412 | 1.072 | 1.022 | 1.024 | 12.29  | 15.00 | 3  | 7   | 140  | 16.4  | 6.52 |

|        |                                                                                                             |       |   |    |    |     |       |        |        |       |        |       |    |     |      |       |      |
|--------|-------------------------------------------------------------------------------------------------------------|-------|---|----|----|-----|-------|--------|--------|-------|--------|-------|----|-----|------|-------|------|
| Q9NZJ4 | Sacsin<br>OS=Homo sapiens<br>GN=SACS<br>PE=1 SV=2 - [SACS_HUMAN]                                            | 2.77  | 1 | 11 | 11 | 23  | 0.876 | 1.413  | 1.368  | 1.024 | 51.19  | 2.77  | 16 | 23  | 4579 | 520.8 | 7.05 |
| P31513 | Dimethylaniline monooxygenase [N-oxide-forming] 3<br>OS=Homo sapiens<br>GN=FMO3<br>PE=1 SV=5 - [FMO3_HUMAN] | 3.01  | 1 | 2  | 2  | 4   | 0.932 | 1.028  | 14.660 | 1.024 | 6.22   | 3.01  | 4  | 4   | 532  | 60.0  | 7.78 |
| Q9H4B4 | Serine/threonine-protein kinase PLK3<br>OS=Homo sapiens<br>GN=PLK3 PE=1 SV=2 - [PLK3_HUMAN]                 | 1.70  | 1 | 1  | 1  | 2   | 0.753 | 0.756  | 0.849  | 1.024 | 0.00   | 1.70  | 1  | 2   | 646  | 71.6  | 9.16 |
| P19838 | Nuclear factor NF-kappa-B p105 subunit<br>OS=Homo sapiens<br>GN=NFKB1<br>PE=1 SV=2 - [NFKB1_HUMAN]          | 18.90 | 1 | 17 | 17 | 49  | 0.891 | 0.988  | 1.104  | 1.024 | 135.20 | 18.90 | 27 | 49  | 968  | 105.3 | 5.40 |
| Q8TDB6 | E3 ubiquitin-protein ligase DTX3L<br>OS=Homo sapiens<br>GN=DTX3L<br>PE=1 SV=1 - [DTX3L_HUMAN]               | 17.30 | 1 | 12 | 12 | 36  | 1.826 | 1.344  | 1.229  | 1.025 | 72.92  | 17.30 | 19 | 36  | 740  | 83.5  | 8.06 |
| Q9BQ39 | ATP-dependent RNA helicase DDX50<br>OS=Homo sapiens<br>GN=DDX50<br>PE=1 SV=1 - [DDX50_HUMAN]                | 8.41  | 1 | 3  | 6  | 15  | 0.888 | 1.274  | 1.039  | 1.025 | 40.07  | 8.41  | 9  | 15  | 737  | 82.5  | 9.17 |
| P35612 | Beta-adducin<br>OS=Homo sapiens<br>GN=ADD2<br>PE=1 SV=3 - [ADDB_HUMAN]                                      | 3.72  | 1 | 2  | 3  | 6   | 0.405 | 11.879 | 3.441  | 1.025 | 16.17  | 3.72  | 6  | 6   | 726  | 80.8  | 5.92 |
| Q86TI2 | Dipeptidyl peptidase 9<br>OS=Homo sapiens<br>GN=DPP9<br>PE=1 SV=3 - [DPP9_HUMAN]                            | 12.63 | 1 | 9  | 10 | 27  | 0.936 | 0.893  | 0.851  | 1.025 | 70.43  | 12.63 | 15 | 27  | 863  | 98.2  | 6.46 |
| O75962 | Triple functional domain protein<br>OS=Homo sapiens<br>GN=TRIO<br>PE=1 SV=2 - [TRIO_HUMAN]                  | 13.72 | 2 | 35 | 36 | 105 | 1.089 | 0.756  | 1.065  | 1.025 | 272.70 | 13.72 | 52 | 105 | 3097 | 346.7 | 6.37 |



|        |                                                                                                                         |       |   |    |    |    |       |       |       |       |        |       |    |    |     |      |      |
|--------|-------------------------------------------------------------------------------------------------------------------------|-------|---|----|----|----|-------|-------|-------|-------|--------|-------|----|----|-----|------|------|
| Q15370 | Transcription elongation factor B polypeptide 2<br>OS=Homo sapiens<br>GN=TCEB2<br>PE=1 SV=1 - [ELOB_HUMAN]              | 24.58 | 1 | 4  | 4  | 19 | 1.005 | 1.008 | 1.135 | 1.025 | 41.35  | 24.58 | 5  | 19 | 118 | 13.1 | 4.88 |
| Q15052 | Rho guanine nucleotide exchange factor 6<br>OS=Homo sapiens<br>GN=ARHGEF6<br>PE=1 SV=2 - [ARHG6_HUMAN]                  | 12.11 | 1 | 7  | 8  | 18 | 0.726 | 0.603 | 0.775 | 1.025 | 44.96  | 12.11 | 10 | 18 | 776 | 87.4 | 6.05 |
| Q9NY35 | Claudin domain-containing protein 1<br>OS=Homo sapiens<br>GN=CLDN1<br>PE=1 SV=1 - [CLDN1_HUMAN]                         | 3.56  | 1 | 1  | 1  | 6  | 1.332 | 0.733 | 0.850 | 1.025 | 12.63  | 3.56  | 2  | 6  | 253 | 28.6 | 5.82 |
| Q96CS3 | FAS-associated factor 2<br>OS=Homo sapiens<br>GN=FAF2<br>PE=1 SV=2 - [FAF2_HUMAN]                                       | 37.08 | 1 | 12 | 12 | 65 | 0.926 | 0.947 | 0.888 | 1.025 | 168.90 | 37.08 | 21 | 65 | 445 | 52.6 | 5.62 |
| Q7Z7H5 | Transmembrane domain-containing protein 4<br>OS=Homo sapiens<br>GN=TMED4<br>PE=1 SV=1 - [TMED4_HUMAN]                   | 31.28 | 1 | 6  | 8  | 22 | 1.077 | 1.119 | 0.894 | 1.025 | 59.58  | 31.28 | 11 | 22 | 227 | 25.9 | 8.28 |
| Q7Z4V5 | Hepatoma-derived growth factor-related protein 2<br>OS=Homo sapiens<br>GN=HDGFRP2<br>PE=1 SV=1 - [HDGR2_HUMAN]          | 13.26 | 1 | 7  | 8  | 25 | 1.145 | 1.367 | 0.956 | 1.026 | 60.85  | 13.26 | 12 | 25 | 671 | 74.3 | 7.49 |
| O60256 | Phosphoribosyl pyrophosphate synthase-associated protein 2<br>OS=Homo sapiens<br>GN=PRPSAP2<br>PE=1 SV=1 - [KPRB_HUMAN] | 29.00 | 1 | 5  | 9  | 23 | 1.073 | 0.772 | 0.874 | 1.026 | 64.15  | 29.00 | 14 | 23 | 369 | 40.9 | 7.44 |
| P60866 | 40S ribosomal protein S20<br>OS=Homo sapiens<br>GN=RPS20<br>PE=1 SV=1 - [RS20_HUMAN]                                    | 41.18 | 1 | 6  | 7  | 78 | 0.922 | 0.971 | 1.018 | 1.026 | 163.50 | 41.18 | 12 | 78 | 119 | 13.4 | 9.94 |

|        |                                                                                                                            |       |   |    |    |    |       |       |       |       |        |       |    |    |     |       |      |
|--------|----------------------------------------------------------------------------------------------------------------------------|-------|---|----|----|----|-------|-------|-------|-------|--------|-------|----|----|-----|-------|------|
| Q96HY7 | Probable 2-oxoglutarate dehydrogenase E1 component DTKD1, mitochondrial OS=Homo sapiens GN=DTKD1 PE=1 SV=2 - [DHTK1_HUMAN] | 1.74  | 1 | 2  | 2  | 3  | 1.357 | 1.366 | 0.680 | 1.026 | 5.93   | 1.74  | 3  | 3  | 919 | 103.0 | 6.93 |
| Q8NBU5 | ATPase family AAA domain-containing protein 1 OS=Homo sapiens GN=ATAD1 PE=1 SV=1 - [ATAD1_HUMAN]                           | 21.88 | 1 | 7  | 7  | 20 | 1.014 | 0.800 | 0.767 | 1.026 | 51.90  | 21.88 | 9  | 20 | 361 | 40.7  | 6.90 |
| P50570 | Dynamin-2 OS=Homo sapiens GN=DNM2 PE=1 SV=2 - [DYN2_HUMAN]                                                                 | 25.29 | 1 | 10 | 26 | 83 | 1.291 | 1.097 | 0.922 | 1.026 | 186.98 | 25.29 | 38 | 83 | 870 | 98.0  | 7.44 |
| Q86TV6 | Tetrapeptide repeat protein 7B OS=Homo sapiens GN=TTC7B PE=1 SV=3 - [TTC7B_HUMAN]                                          | 8.07  | 1 | 4  | 4  | 6  | 1.347 | 0.943 | 0.743 | 1.026 | 8.91   | 8.07  | 6  | 6  | 843 | 94.1  | 6.89 |
| O94763 | Unconventional prefoldin RPB5 interactor 1 OS=Homo sapiens GN=URI1 PE=1 SV=3 - [RMP_HUMAN]                                 | 8.41  | 2 | 4  | 6  | 8  | 0.794 | 1.262 | 0.952 | 1.026 | 15.15  | 8.41  | 7  | 8  | 535 | 59.8  | 5.05 |
| Q8TEA7 | TBC domain-containing protein kinase-like protein OS=Homo sapiens GN=TBCK PE=1 SV=4 - [TBCK_HUMAN]                         | 4.82  | 1 | 4  | 4  | 7  | 0.862 | 1.141 | 1.198 | 1.026 | 12.30  | 4.82  | 6  | 7  | 893 | 100.6 | 6.58 |
| Q9H2M3 | S-methylmethionine--homocysteine S-methyltransferase BHMT2 OS=Homo sapiens GN=BHMT2 PE=1 SV=1 - [BHMT2_HUMAN]              | 2.75  | 2 | 1  | 1  | 2  | 0.511 | 0.444 | 0.805 | 1.026 | 4.99   | 2.75  | 1  | 2  | 363 | 40.3  | 5.87 |
| Q9UBK8 | Methionine synthase reductase OS=Homo sapiens GN=MTRR PE=1 SV=3 - [MTRR_HUMAN]                                             | 2.48  | 1 | 1  | 1  | 4  | 0.712 | 0.882 | 2.203 | 1.026 | 11.26  | 2.48  | 2  | 4  | 725 | 80.4  | 6.49 |

|        |                                                                                                                                                  |       |   |    |    |     |       |       |       |       |        |       |    |     |      |       |       |
|--------|--------------------------------------------------------------------------------------------------------------------------------------------------|-------|---|----|----|-----|-------|-------|-------|-------|--------|-------|----|-----|------|-------|-------|
| O75691 | Small subunit<br>processome<br>component 20<br>homolog<br>OS=Homo<br>sapiens<br>GN=UTP20<br>PE=1 SV=3 -<br>[UTP20_HUMAN<br>]                     | 1.72  | 1 | 4  | 4  | 5   | 0.958 | 1.013 | 0.796 | 1.026 | 15.37  | 1.72  | 5  | 5   | 2785 | 318.2 | 7.39  |
| O00154 | Cytosolic acyl<br>coenzyme A<br>thioester<br>hydrolase<br>OS=Homo<br>sapiens<br>GN=ACOT7<br>PE=1 SV=3 -<br>[BACH_HUMAN]                          | 29.47 | 1 | 9  | 9  | 64  | 1.267 | 1.059 | 2.245 | 1.027 | 142.18 | 29.47 | 16 | 64  | 380  | 41.8  | 8.54  |
| Q5THR3 | EF-hand<br>calcium-binding<br>domain-<br>containing<br>protein 6<br>OS=Homo<br>sapiens<br>GN=EFCAB6<br>PE=1 SV=1 -<br>[EFCB6_HUMAN<br>]          | 0.87  | 1 | 1  | 1  | 1   | 0.896 | 0.870 | 1.061 | 1.027 | 2.23   | 0.87  | 1  | 1   | 1501 | 172.8 | 8.40  |
| P46783 | 40S ribosomal<br>protein S10<br>OS=Homo<br>sapiens<br>GN=RPS10<br>PE=1 SV=1 -<br>[RS10_HUMAN]                                                    | 51.52 | 2 | 13 | 14 | 105 | 1.052 | 1.109 | 1.003 | 1.027 | 235.88 | 51.52 | 23 | 105 | 165  | 18.9  | 10.15 |
| Q15878 | Voltage-<br>dependent R-<br>type calcium<br>channel<br>subunit alpha-<br>1E OS=Homo<br>sapiens<br>GN=CACNA1E<br>PE=1 SV=3 -<br>[CAC1E_HUMAN<br>] | 0.56  | 1 | 1  | 1  | 1   | 0.877 | 1.026 | 1.569 | 1.027 | 1.85   | 0.56  | 1  | 1   | 2313 | 261.6 | 8.24  |
| P21283 | V-type proton<br>ATPase subunit<br>C 1 OS=Homo<br>sapiens<br>GN=ATP6V1C1<br>PE=1 SV=4 -<br>[VATC1_HUMAN<br>]                                     | 31.68 | 1 | 14 | 14 | 61  | 1.035 | 0.983 | 1.034 | 1.027 | 113.74 | 31.68 | 22 | 61  | 382  | 43.9  | 7.46  |
| P26641 | Elongation<br>factor 1-<br>gamma<br>OS=Homo<br>sapiens<br>GN=EEF1G<br>PE=1 SV=3 -<br>[EF1G_HUMAN]                                                | 32.04 | 1 | 18 | 18 | 235 | 1.024 | 1.034 | 1.098 | 1.027 | 459.89 | 32.04 | 27 | 235 | 437  | 50.1  | 6.67  |
| Q9P2D3 | HEAT repeat-<br>containing<br>protein 5B<br>OS=Homo<br>sapiens<br>GN=HEATR5B<br>PE=1 SV=2 -<br>[HTR5B_HUMAN<br>]                                 | 1.55  | 1 | 2  | 3  | 17  | 1.404 | 0.964 | 0.876 | 1.027 | 35.37  | 1.55  | 4  | 17  | 2071 | 224.2 | 7.17  |

|        |                                                                                                              |       |   |    |    |    |       |       |       |       |        |       |    |    |      |       |       |
|--------|--------------------------------------------------------------------------------------------------------------|-------|---|----|----|----|-------|-------|-------|-------|--------|-------|----|----|------|-------|-------|
| Q96AX1 | Vacuolar protein sorting-associated protein 33A<br>OS=Homo sapiens<br>GN=VPS33A<br>PE=1 SV=1 - [VP33A_HUMAN] | 13.09 | 1 | 7  | 7  | 16 | 0.990 | 1.164 | 1.226 | 1.027 | 36.05  | 13.09 | 11 | 16 | 596  | 67.6  | 6.96  |
| Q96Q45 | Transmembrane protein 237<br>OS=Homo sapiens<br>GN=TMEM237<br>PE=1 SV=2 - [TM237_HUMAN]                      | 14.22 | 1 | 5  | 5  | 13 | 1.253 | 0.579 | 0.832 | 1.027 | 26.06  | 14.22 | 7  | 13 | 408  | 45.5  | 6.47  |
| P10176 | Cytochrome c oxidase subunit 8A, mitochondrial<br>OS=Homo sapiens<br>GN=COX8A<br>PE=1 SV=2 - [COX8A_HUMAN]   | 13.04 | 1 | 1  | 1  | 11 | 0.898 | 0.879 | 0.960 | 1.027 | 20.33  | 13.04 | 2  | 11 | 69   | 7.6   | 10.24 |
| P78367 | Homeobox protein Nkx-3.2<br>OS=Homo sapiens<br>GN=NKX3-2<br>PE=2 SV=2 - [NKX32_HUMAN]                        | 11.71 | 1 | 2  | 2  | 3  | 1.819 | 0.926 | 1.199 | 1.027 | 7.64   | 11.71 | 2  | 3  | 333  | 34.8  | 7.93  |
| Q13098 | COP9 signalosome complex subunit 1<br>OS=Homo sapiens<br>GN=GPS1<br>PE=1 SV=4 - [CSN1_HUMAN]                 | 23.83 | 1 | 14 | 14 | 53 | 0.837 | 0.933 | 0.977 | 1.028 | 139.68 | 23.83 | 19 | 53 | 491  | 55.5  | 6.74  |
| P27448 | MAP/microtubule affinity-regulating kinase 3<br>OS=Homo sapiens<br>GN=MARK3<br>PE=1 SV=4 - [MARK3_HUMAN]     | 11.42 | 2 | 6  | 8  | 16 | 1.299 | 0.994 | 1.039 | 1.028 | 40.14  | 11.42 | 11 | 16 | 753  | 84.4  | 9.57  |
| P53990 | IST1 homolog<br>OS=Homo sapiens<br>GN=IST1 PE=1 SV=1 - [IST1_HUMAN]                                          | 25.82 | 1 | 11 | 11 | 39 | 1.202 | 0.986 | 0.950 | 1.028 | 100.17 | 25.82 | 17 | 39 | 364  | 39.7  | 5.35  |
| Q07890 | Son of sevenless homolog 2<br>OS=Homo sapiens<br>GN=SOS2<br>PE=1 SV=2 - [SOS2_HUMAN]                         | 2.55  | 1 | 2  | 3  | 5  | 0.890 | 0.720 | 0.760 | 1.028 | 9.44   | 2.55  | 4  | 5  | 1332 | 152.9 | 6.84  |

|        |                                                                                                                                                                       |       |   |    |    |     |       |       |       |       |        |       |    |     |      |       |      |
|--------|-----------------------------------------------------------------------------------------------------------------------------------------------------------------------|-------|---|----|----|-----|-------|-------|-------|-------|--------|-------|----|-----|------|-------|------|
| P49419 | Alpha-aminoadipic semialdehyde dehydrogenase<br>OS=Homo sapiens<br>GN=ALDH7A1<br>PE=1 SV=5 - [AL7A1_HUMAN]<br>Fragile X mental retardation syndrome-related protein 2 | 39.52 | 1 | 19 | 19 | 114 | 1.112 | 1.104 | 0.891 | 1.028 | 307.86 | 39.52 | 33 | 114 | 539  | 58.5  | 7.99 |
| P51116 | OS=Homo sapiens<br>GN=FXR2<br>PE=1 SV=2 - [FXR2_HUMAN]<br>Long-chain-fatty-acid--CoA ligase 3                                                                         | 17.09 | 1 | 5  | 8  | 24  | 1.031 | 1.043 | 1.099 | 1.028 | 84.11  | 17.09 | 11 | 24  | 673  | 74.2  | 6.23 |
| O95573 | OS=Homo sapiens<br>GN=ACSL3<br>PE=1 SV=3 - [ACSL3_HUMAN]<br>CXADR-like membrane protein                                                                               | 32.08 | 1 | 15 | 19 | 72  | 0.972 | 0.702 | 0.716 | 1.028 | 168.22 | 32.08 | 30 | 72  | 720  | 80.4  | 8.38 |
| Q9H6B4 | OS=Homo sapiens<br>GN=CLMP<br>PE=1 SV=1 - [CLMP_HUMAN]<br>60S ribosomal protein L30                                                                                   | 15.55 | 1 | 4  | 4  | 13  | 1.330 | 0.896 | 0.957 | 1.028 | 31.44  | 15.55 | 6  | 13  | 373  | 41.3  | 7.99 |
| P62888 | OS=Homo sapiens<br>GN=RPL30<br>PE=1 SV=2 - [RPL30_HUMAN]<br>Centrosomal protein of 152 kDa                                                                            | 55.65 | 1 | 7  | 8  | 48  | 0.921 | 1.068 | 1.004 | 1.028 | 107.68 | 55.65 | 13 | 48  | 115  | 12.8  | 9.63 |
| O94986 | OS=Homo sapiens<br>GN=CEP152<br>PE=1 SV=4 - [CE152_HUMAN]<br>E3 ubiquitin-protein ligase MIB1                                                                         | 3.80  | 1 | 5  | 5  | 7   | 0.656 | 0.878 | 0.916 | 1.028 | 14.26  | 3.80  | 5  | 7   | 1710 | 195.5 | 5.60 |
| Q86YT6 | OS=Homo sapiens<br>GN=MIB1<br>PE=1 SV=1 - [MIB1_HUMAN]<br>Inactive rhomboid protein 1                                                                                 | 5.17  | 1 | 5  | 5  | 7   | 0.694 | 1.007 | 1.048 | 1.028 | 18.03  | 5.17  | 5  | 7   | 1006 | 110.1 | 6.92 |
| Q96CC6 | OS=Homo sapiens<br>GN=RHDF1<br>PE=1 SV=2 - [RHDF1_HUMAN]<br>Sulfite oxidase, mitochondrial                                                                            | 7.72  | 1 | 7  | 7  | 13  | 1.535 | 0.989 | 0.994 | 1.028 | 25.78  | 7.72  | 10 | 13  | 855  | 97.3  | 8.44 |
| P51687 | OS=Homo sapiens<br>GN=SUOX<br>PE=1 SV=2 - [SUOX_HUMAN]                                                                                                                | 5.50  | 1 | 3  | 3  | 5   | 1.289 | 0.977 | 1.200 | 1.028 | 12.63  | 5.50  | 4  | 5   | 545  | 60.2  | 6.11 |

|        |                                                                                                                                                                         |       |   |    |    |    |       |       |       |       |        |       |    |    |      |       |       |
|--------|-------------------------------------------------------------------------------------------------------------------------------------------------------------------------|-------|---|----|----|----|-------|-------|-------|-------|--------|-------|----|----|------|-------|-------|
| Q9P0W5 | Schwannomin-interacting protein 1<br>OS=Homo sapiens<br>GN=SCHIP1<br>PE=1 SV=1 - [SCH1_HUMAN]                                                                           | 2.26  | 1 | 1  | 1  | 1  | 0.858 | 1.033 | 1.056 | 1.028 | 0.00   | 2.26  | 1  | 1  | 487  | 53.4  | 5.12  |
| Q9BZQ4 | Nicotinamide mononucleotide adenyltransferase 2<br>OS=Homo sapiens<br>GN=NMNAT2<br>PE=1 SV=1 - [NMNA2_HUMAN]<br>KN motif and ankyrin repeat domain-containing protein 1 | 4.56  | 1 | 1  | 1  | 1  | 0.929 | 1.036 | 1.290 | 1.028 | 3.25   | 4.56  | 1  | 1  | 307  | 34.4  | 7.06  |
| Q14678 | OS=Homo sapiens<br>GN=KANK1<br>PE=1 SV=3 - [KANK1_HUMAN]                                                                                                                | 3.55  | 1 | 2  | 6  | 15 | 0.706 | 1.041 | 1.390 | 1.029 | 38.72  | 3.55  | 8  | 15 | 1352 | 147.2 | 5.30  |
| Q8IY26 | Presqualene diphosphate phosphatase<br>OS=Homo sapiens<br>GN=PPAPDC2<br>PE=1 SV=3 - [PPAC2_HUMAN]                                                                       | 3.39  | 1 | 1  | 1  | 4  | 1.392 | 1.037 | 0.939 | 1.029 | 6.44   | 3.39  | 2  | 4  | 295  | 32.2  | 9.99  |
| O43149 | Zinc finger ZZ-type and EF-hand domain-containing protein 1<br>OS=Homo sapiens<br>GN=ZZEF1<br>PE=1 SV=6 - [ZZEF1_HUMAN]                                                 | 2.67  | 1 | 5  | 7  | 11 | 1.275 | 0.912 | 1.181 | 1.029 | 15.91  | 2.67  | 8  | 11 | 2961 | 330.9 | 5.95  |
| P26368 | Splicing factor U2AF 65 kDa subunit<br>OS=Homo sapiens<br>GN=U2AF2<br>PE=1 SV=4 - [U2AF2_HUMAN]                                                                         | 27.16 | 1 | 9  | 9  | 24 | 0.991 | 1.026 | 0.909 | 1.029 | 57.68  | 27.16 | 15 | 24 | 475  | 53.5  | 9.09  |
| O95793 | Double-stranded RNA-binding protein Staufin homolog 1<br>OS=Homo sapiens<br>GN=STAU1<br>PE=1 SV=2 - [STAU1_HUMAN]                                                       | 30.16 | 1 | 13 | 14 | 49 | 1.056 | 1.093 | 1.140 | 1.029 | 106.04 | 30.16 | 22 | 49 | 577  | 63.1  | 9.44  |
| P82912 | 28S ribosomal protein S11, mitochondrial<br>OS=Homo sapiens<br>GN=MRPS11<br>PE=1 SV=2 - [RT11_HUMAN]                                                                    | 5.67  | 1 | 1  | 1  | 6  | 1.058 | 1.516 | 0.889 | 1.029 | 12.61  | 5.67  | 2  | 6  | 194  | 20.6  | 10.81 |

|        |                                                                                                               |       |   |    |    |     |       |       |       |       |        |       |    |     |      |       |       |
|--------|---------------------------------------------------------------------------------------------------------------|-------|---|----|----|-----|-------|-------|-------|-------|--------|-------|----|-----|------|-------|-------|
| Q9HI90 | Syntenin-2<br>OS=Homo sapiens<br>GN=SDCBP2<br>PE=2 SV=2 - [SDCB2_HUMAN]                                       | 2.05  | 1 | 1  | 1  | 2   | 0.789 | 1.027 | 0.725 | 1.029 | 4.64   | 2.05  | 1  | 2   | 292  | 31.6  | 9.07  |
| P46100 | Transcriptional regulator ATRX<br>OS=Homo sapiens<br>GN=ATRX<br>PE=1 SV=5 - [ATRX_HUMAN]                      | 2.09  | 1 | 2  | 3  | 4   | 1.399 | 1.871 | 1.133 | 1.029 | 8.15   | 2.09  | 4  | 4   | 2492 | 282.4 | 6.58  |
| Q96N64 | PWWP domain-containing protein 2A<br>OS=Homo sapiens<br>GN=PWWP2A<br>PE=1 SV=2 - [PWP2A_HUMAN]                | 1.85  | 1 | 1  | 1  | 2   | 0.721 | 0.993 | 1.267 | 1.029 | 2.05   | 1.85  | 1  | 2   | 755  | 81.9  | 9.00  |
| B2RXF5 | Zinc finger and BTB domain-containing protein 42<br>OS=Homo sapiens<br>GN=ZBTB42<br>PE=1 SV=2 - [ZBT42_HUMAN] | 1.90  | 1 | 1  | 1  | 5   | 1.058 | 1.083 | 1.039 | 1.029 | 6.74   | 1.90  | 2  | 5   | 422  | 46.5  | 8.47  |
| P61106 | Ras-related protein Rab-14<br>OS=Homo sapiens<br>GN=RAB14<br>PE=1 SV=4 - [RAB14_HUMAN]                        | 74.88 | 2 | 12 | 13 | 101 | 1.054 | 0.762 | 0.848 | 1.029 | 273.71 | 74.88 | 21 | 101 | 215  | 23.9  | 6.21  |
| P00403 | Cytochrome c oxidase subunit 2<br>OS=Homo sapiens<br>GN=MT-CO2<br>PE=1 SV=1 - [COX2_HUMAN]                    | 11.89 | 1 | 3  | 3  | 43  | 0.827 | 0.982 | 0.706 | 1.030 | 90.31  | 11.89 | 5  | 43  | 227  | 25.5  | 4.82  |
| P37275 | Zinc finger E-box-binding homeobox 1<br>OS=Homo sapiens<br>GN=ZEB1<br>PE=1 SV=2 - [ZEB1_HUMAN]                | 4.89  | 1 | 4  | 4  | 9   | 1.307 | 1.572 | 1.384 | 1.030 | 14.88  | 4.89  | 6  | 9   | 1124 | 124.0 | 4.94  |
| P82094 | TATA element modulatory factor<br>OS=Homo sapiens<br>GN=TMF1<br>PE=1 SV=2 - [TMF1_HUMAN]                      | 22.05 | 1 | 18 | 20 | 40  | 0.973 | 0.943 | 1.043 | 1.030 | 79.91  | 22.05 | 28 | 40  | 1093 | 122.8 | 4.92  |
| P62857 | 40S ribosomal protein S28<br>OS=Homo sapiens<br>GN=RPS28<br>PE=1 SV=1 - [RS28_HUMAN]                          | 52.17 | 1 | 4  | 4  | 158 | 0.788 | 1.016 | 0.978 | 1.030 | 405.22 | 52.17 | 6  | 158 | 69   | 7.8   | 10.70 |

|        |                                                                                                                          |       |   |    |    |     |       |       |       |       |        |       |    |     |      |       |       |
|--------|--------------------------------------------------------------------------------------------------------------------------|-------|---|----|----|-----|-------|-------|-------|-------|--------|-------|----|-----|------|-------|-------|
| Q8N8S7 | Protein enabled homolog<br>OS=Homo sapiens<br>GN=ENAH<br>PE=1 SV=2 - [ENAH_HUMAN]<br>Uncharacterized protein<br>C17orf59 | 36.21 | 1 | 18 | 18 | 109 | 0.735 | 0.546 | 0.627 | 1.030 | 225.85 | 36.21 | 28 | 109 | 591  | 66.5  | 6.93  |
| Q96GS4 | OS=Homo sapiens<br>GN=C17orf59<br>PE=1 SV=2 - [CQ059_HUMAN]                                                              | 16.53 | 1 | 5  | 5  | 8   | 1.043 | 0.996 | 1.220 | 1.030 | 13.24  | 16.53 | 7  | 8   | 357  | 37.2  | 5.76  |
| P41240 | Tyrosine-protein kinase CSK<br>OS=Homo sapiens<br>GN=CSK PE=1 SV=1 - [CSK_HUMAN]                                         | 24.89 | 1 | 11 | 11 | 35  | 1.012 | 0.979 | 1.084 | 1.030 | 64.75  | 24.89 | 18 | 35  | 450  | 50.7  | 7.06  |
| P05141 | ADP/ATP translocase 2<br>OS=Homo sapiens<br>GN=SLC25A5<br>PE=1 SV=7 - [ADT2_HUMAN]                                       | 48.32 | 2 | 6  | 18 | 107 | 1.289 | 1.188 | 0.821 | 1.030 | 242.16 | 48.32 | 30 | 107 | 298  | 32.8  | 9.69  |
| P82909 | 28S ribosomal protein S36, mitochondrial<br>OS=Homo sapiens<br>GN=MRPS36<br>PE=1 SV=2 - [RT36_HUMAN]                     | 57.28 | 1 | 5  | 5  | 20  | 1.621 | 1.871 | 1.730 | 1.030 | 59.08  | 57.28 | 7  | 20  | 103  | 11.5  | 9.99  |
| O15040 | Tectonin beta-propeller repeat-containing protein 2<br>OS=Homo sapiens<br>GN=TECPR2<br>PE=1 SV=4 - [TCPR2_HUMAN]         | 2.41  | 1 | 3  | 3  | 6   | 0.721 | 1.229 | 1.207 | 1.030 | 14.54  | 2.41  | 3  | 6   | 1411 | 153.8 | 5.55  |
| Q9BRU9 | rRNA-processing protein UTP23 homolog<br>OS=Homo sapiens<br>GN=UTP23<br>PE=1 SV=2 - [UTP23_HUMAN]                        | 11.24 | 1 | 3  | 3  | 5   | 0.959 | 1.058 | 0.989 | 1.031 | 11.98  | 11.24 | 3  | 5   | 249  | 28.4  | 10.07 |
| P55957 | BH3-interacting domain death agonist<br>OS=Homo sapiens<br>GN=BID PE=1 SV=1 - [BID_HUMAN]                                | 31.79 | 1 | 4  | 4  | 15  | 1.005 | 0.556 | 1.191 | 1.031 | 45.70  | 31.79 | 6  | 15  | 195  | 22.0  | 5.44  |
| P54098 | DNA polymerase subunit gamma-1<br>OS=Homo sapiens<br>GN=POLG<br>PE=1 SV=1 - [DPOG1_HUMAN]                                | 2.10  | 1 | 2  | 2  | 5   | 0.914 | 1.281 | 1.133 | 1.031 | 9.74   | 2.10  | 3  | 5   | 1239 | 139.5 | 6.90  |



|        |                                                                                                                                                        |       |   |    |    |    |       |       |       |       |        |       |    |    |      |       |       |
|--------|--------------------------------------------------------------------------------------------------------------------------------------------------------|-------|---|----|----|----|-------|-------|-------|-------|--------|-------|----|----|------|-------|-------|
| Q9Y5H9 | Protocadherin<br>alpha-2<br>OS=Homo<br>sapiens<br>GN=PCDHA2<br>PE=1 SV=1 -<br>[PCDA2_HUMAN<br>]<br>Coiled-coil<br>domain-<br>containing<br>protein 132 | 1.16  | 1 | 1  | 1  | 1  | 1.006 | 0.804 | 1.189 | 1.031 | 2.14   | 1.16  | 1  | 1  | 948  | 102.0 | 5.20  |
| Q96JG6 | OS=Homo<br>sapiens<br>GN=CCDC132<br>PE=1 SV=3 -<br>[CC132_HUMAN<br>]<br>Sorting nexin-<br>33 OS=Homo<br>sapiens                                        | 8.20  | 1 | 7  | 7  | 13 | 1.061 | 1.281 | 1.022 | 1.031 | 30.57  | 8.20  | 10 | 13 | 964  | 111.1 | 6.20  |
| Q8WV41 | GN=SNX33<br>PE=1 SV=1 -<br>[SNX33_HUMAN<br>]<br>MAP7 domain-<br>containing<br>protein 1                                                                | 11.85 | 1 | 5  | 6  | 13 | 1.005 | 1.014 | 0.851 | 1.031 | 36.83  | 11.85 | 9  | 13 | 574  | 65.2  | 6.79  |
| Q3KQU3 | OS=Homo<br>sapiens<br>GN=MAP7D1<br>PE=1 SV=1 -<br>[MA7D1_HUMA<br>N]<br>cGMP-inhibited<br>3',5'-cyclic<br>phosphodiester<br>ase A                       | 26.28 | 2 | 18 | 20 | 82 | 0.887 | 1.236 | 1.413 | 1.031 | 195.84 | 26.28 | 28 | 82 | 841  | 92.8  | 10.11 |
| Q14432 | OS=Homo<br>sapiens<br>GN=PDE3A<br>PE=1 SV=3 -<br>[PDE3A_HUMAN<br>]<br>UPF0769<br>protein<br>C21orf59                                                   | 3.07  | 1 | 3  | 3  | 6  | 0.388 | 0.940 | 1.948 | 1.031 | 10.05  | 3.07  | 3  | 6  | 1141 | 124.9 | 6.00  |
| P57076 | OS=Homo<br>sapiens<br>GN=C21orf59<br>PE=1 SV=1 -<br>[CU059_HUMAN<br>]                                                                                  | 2.41  | 1 | 1  | 1  | 2  | 0.719 | 0.826 | 0.749 | 1.031 | 4.72   | 2.41  | 1  | 2  | 290  | 33.2  | 7.44  |
| Q9P2B2 | Prostaglandin<br>F2 receptor<br>negative<br>regulator<br>OS=Homo<br>sapiens<br>GN=PTGFRN<br>PE=1 SV=2 -<br>[FPRP_HUMAN]                                | 18.66 | 1 | 16 | 16 | 49 | 0.905 | 0.558 | 0.544 | 1.031 | 93.70  | 18.66 | 26 | 49 | 879  | 98.5  | 6.61  |
| Q9P2K8 | Eukaryotic<br>translation<br>initiation factor<br>2-alpha kinase<br>4 OS=Homo<br>sapiens<br>GN=EIF2AK4<br>PE=1 SV=3 -<br>[E2AK4_HUMAN<br>]             | 11.16 | 1 | 13 | 14 | 36 | 0.835 | 0.812 | 0.804 | 1.031 | 72.02  | 11.16 | 19 | 36 | 1649 | 186.8 | 6.28  |
| P32969 | 60S ribosomal<br>protein L9<br>OS=Homo<br>sapiens<br>GN=RPL9 PE=1<br>SV=1 -<br>[RL9_HUMAN]                                                             | 43.75 | 1 | 10 | 10 | 56 | 0.865 | 0.942 | 0.858 | 1.031 | 110.11 | 43.75 | 15 | 56 | 192  | 21.8  | 9.95  |

|        |                                                                                                                                                    |       |   |    |    |    |       |       |       |       |        |       |    |    |      |       |      |
|--------|----------------------------------------------------------------------------------------------------------------------------------------------------|-------|---|----|----|----|-------|-------|-------|-------|--------|-------|----|----|------|-------|------|
| Q9NWX8 | BRISC and<br>BRCA1-A<br>complex<br>member 1<br>OS=Homo<br>sapiens<br>GN=BABAM1<br>PE=1 SV=1 -<br>[BABAM1_HUMAN<br>]                                | 25.53 | 1 | 5  | 6  | 21 | 0.951 | 1.008 | 1.230 | 1.032 | 59.21  | 25.53 | 7  | 21 | 329  | 36.5  | 4.64 |
| Q9UL18 | Protein<br>argonaute-1<br>OS=Homo<br>sapiens<br>GN=AGO1<br>PE=1 SV=3 -<br>[AGO1_HUMAN]                                                             | 11.32 | 2 | 4  | 9  | 19 | 1.389 | 1.258 | 0.896 | 1.032 | 32.04  | 11.32 | 11 | 19 | 857  | 97.2  | 9.16 |
| Q8IZL8 | Proline-,<br>glutamic acid-<br>and leucine-<br>rich protein 1<br>OS=Homo<br>sapiens<br>GN=PELP1<br>PE=1 SV=2 -<br>[PELP1_HUMAN<br>]                | 7.43  | 1 | 7  | 7  | 23 | 0.919 | 0.950 | 0.869 | 1.032 | 49.48  | 7.43  | 14 | 23 | 1130 | 119.6 | 4.34 |
| Q13542 | Eukaryotic<br>translation<br>initiation factor<br>4E-binding<br>protein 2<br>OS=Homo<br>sapiens<br>GN=EIF4EBP2<br>PE=1 SV=1 -<br>[4EBP2_HUMAN<br>] | 10.83 | 1 | 1  | 1  | 2  | 0.613 | 0.946 | 0.618 | 1.032 | 4.68   | 10.83 | 2  | 2  | 120  | 12.9  | 6.67 |
| Q00765 | Receptor<br>expression-<br>enhancing<br>protein 5<br>OS=Homo<br>sapiens<br>GN=REEP5<br>PE=1 SV=3 -<br>[REEP5_HUMAN<br>]                            | 21.69 | 1 | 7  | 7  | 52 | 1.420 | 0.844 | 0.772 | 1.032 | 118.81 | 21.69 | 11 | 52 | 189  | 21.5  | 8.10 |
| Q9Y6Q2 | Stonin-1<br>OS=Homo<br>sapiens<br>GN=STON1<br>PE=1 SV=2 -<br>[STON1_HUMAN<br>]                                                                     | 2.18  | 1 | 2  | 2  | 2  | 0.946 | 1.316 | 1.240 | 1.032 | 4.22   | 2.18  | 2  | 2  | 735  | 83.1  | 6.20 |
| Q9NUJ1 | Myophenolic<br>acid acyl-<br>glucuronide<br>esterase,<br>mitochondrial<br>OS=Homo<br>sapiens<br>GN=ABHD10<br>PE=1 SV=1 -<br>[ABHDA_HUMAN<br>]      | 21.90 | 1 | 6  | 6  | 13 | 0.933 | 1.286 | 0.847 | 1.032 | 34.48  | 21.90 | 10 | 13 | 306  | 33.9  | 8.57 |
| Q13459 | Unconventional<br>myosin-IXb<br>OS=Homo<br>sapiens<br>GN=MYO9B<br>PE=1 SV=3 -<br>[MYO9B_HUMAN<br>]                                                 | 14.09 | 1 | 26 | 28 | 52 | 0.703 | 0.948 | 1.205 | 1.032 | 115.94 | 14.09 | 38 | 52 | 2157 | 243.2 | 8.75 |

|        |                                                                                                                 |       |   |     |     |      |       |       |       |       |         |       |     |      |      |       |      |
|--------|-----------------------------------------------------------------------------------------------------------------|-------|---|-----|-----|------|-------|-------|-------|-------|---------|-------|-----|------|------|-------|------|
| Q15149 | Plectin<br>OS=Homo sapiens<br>GN=PLEC PE=1 SV=3 - [PLEC_HUMAN]                                                  | 60.35 | 3 | 290 | 305 | 2695 | 1.359 | 1.214 | 1.095 | 1.032 | 6623.17 | 60.35 | 530 | 2695 | 4684 | 531.5 | 5.96 |
| Q8NC06 | Acyl-CoA-binding domain-containing protein 4<br>OS=Homo sapiens<br>GN=ACBD4 PE=1 SV=2 - [ACBD4_HUMAN]           | 4.85  | 1 | 1   | 1   | 1    |       | 1.813 | 1.475 | 1.032 | 2.73    | 4.85  | 1   | 1    | 268  | 30.3  | 7.12 |
| Q9Y2X0 | Mediator of RNA polymerase II transcription subunit 16<br>OS=Homo sapiens<br>GN=MED16 PE=1 SV=2 - [MED16_HUMAN] | 0.91  | 1 | 1   | 1   | 1    | 1.005 | 1.052 | 0.869 | 1.032 | 0.00    | 0.91  | 1   | 1    | 877  | 96.7  | 7.37 |
| Q8TD16 | Protein bicaudal D homolog 2<br>OS=Homo sapiens<br>GN=BICD2 PE=1 SV=1 - [BICD2_HUMAN]                           | 18.33 | 1 | 13  | 14  | 37   | 0.745 | 0.872 | 1.069 | 1.033 | 124.83  | 18.33 | 18  | 37   | 824  | 93.5  | 5.44 |
| Q9H0P0 | Cytosolic 5'-nucleotidase 3A<br>OS=Homo sapiens<br>GN=NT5C3A PE=1 SV=3 - [SNT3A_HUMAN]                          | 16.96 | 2 | 5   | 6   | 14   | 1.003 | 0.776 | 0.692 | 1.033 | 33.96   | 16.96 | 8   | 14   | 336  | 37.9  | 7.12 |
| Q86UE4 | Protein LYRIC<br>OS=Homo sapiens<br>GN=MTDH PE=1 SV=2 - [LYRIC_HUMAN]                                           | 49.83 | 1 | 27  | 27  | 150  | 1.017 | 0.870 | 0.962 | 1.033 | 368.79  | 49.83 | 43  | 150  | 582  | 63.8  | 9.32 |
| Q15070 | Mitochondrial inner membrane protein OXA1L<br>OS=Homo sapiens<br>GN=OXA1L PE=1 SV=3 - [OXA1L_HUMAN]             | 14.02 | 1 | 6   | 6   | 17   | 0.970 | 1.111 | 0.994 | 1.033 | 28.24   | 14.02 | 11  | 17   | 435  | 48.5  | 9.45 |
| Q9UKA9 | Polypyrimidine tract-binding protein 2<br>OS=Homo sapiens<br>GN=PTBP2 PE=1 SV=1 - [PTBP2_HUMAN]                 | 1.88  | 1 | 1   | 1   | 1    | 1.441 | 1.275 | 0.929 | 1.033 | 1.83    | 1.88  | 1   | 1    | 531  | 57.5  | 8.66 |
| Q96B70 | Leukocyte receptor cluster member 9<br>OS=Homo sapiens<br>GN=LENG9 PE=2 SV=2 - [LENG9_HUMAN]                    | 4.39  | 1 | 2   | 2   | 3    | 0.919 | 1.160 | 1.273 | 1.033 | 7.89    | 4.39  | 3   | 3    | 501  | 53.1  | 7.84 |

|        |                                                                                                              |       |   |    |    |    |       |       |       |       |       |       |    |    |      |       |      |
|--------|--------------------------------------------------------------------------------------------------------------|-------|---|----|----|----|-------|-------|-------|-------|-------|-------|----|----|------|-------|------|
| O60503 | Adenylylase type 9<br>OS=Homo sapiens<br>GN=ADCY9<br>PE=1 SV=4 - [ADCY9_HUMAN]                               | 7.91  | 1 | 11 | 11 | 21 | 1.214 | 0.585 | 0.775 | 1.033 | 57.09 | 7.91  | 15 | 21 | 1353 | 150.6 | 7.34 |
| Q9H955 | Fukutin-related protein<br>OS=Homo sapiens<br>GN=FKRP<br>PE=1 SV=1 - [FKRP_HUMAN]                            | 3.84  | 2 | 2  | 2  | 2  | 0.860 | 0.843 | 1.084 | 1.033 | 3.82  | 3.84  | 2  | 2  | 495  | 54.5  | 7.40 |
| Q96EPO | E3 ubiquitin-protein ligase RNF31<br>OS=Homo sapiens<br>GN=RNF31<br>PE=1 SV=1 - [RNF31_HUMAN]                | 6.06  | 1 | 5  | 5  | 17 | 1.144 | 0.961 | 0.972 | 1.033 | 34.30 | 6.06  | 10 | 17 | 1072 | 119.6 | 6.57 |
| A6NLC5 | UPF0524 protein C3orf70<br>OS=Homo sapiens<br>GN=C3orf70<br>PE=2 SV=1 - [CC070_HUMAN]                        | 6.00  | 1 | 1  | 1  | 1  | 1.457 | 1.110 | 1.695 | 1.033 | 2.07  | 6.00  | 1  | 1  | 250  | 27.8  | 4.96 |
| Q5T0D9 | Tumor protein p63-regulated gene 1-like protein<br>OS=Homo sapiens<br>GN=TPRG1L<br>PE=1 SV=1 - [TPRGL_HUMAN] | 20.96 | 1 | 3  | 3  | 10 | 0.790 | 0.921 | 0.934 | 1.033 | 21.87 | 20.96 | 4  | 10 | 272  | 30.2  | 7.34 |
| O94916 | Nuclear factor of activated T-cells 5<br>OS=Homo sapiens<br>GN=NFAT5<br>PE=1 SV=1 - [NFAT5_HUMAN]            | 2.09  | 1 | 3  | 3  | 4  | 1.515 | 1.003 | 1.232 | 1.033 | 10.67 | 2.09  | 4  | 4  | 1531 | 165.7 | 5.24 |
| Q15517 | Corneodesmosin<br>OS=Homo sapiens<br>GN=CDSN<br>PE=1 SV=3 - [CDSN_HUMAN]                                     | 7.75  | 1 | 2  | 2  | 2  | 0.497 | 1.945 | 0.968 | 1.033 | 2.10  | 7.75  | 2  | 2  | 529  | 51.5  | 8.35 |
| Q10589 | Bone marrow stromal antigen 2<br>OS=Homo sapiens<br>GN=BST2<br>PE=1 SV=1 - [BST2_HUMAN]                      | 5.56  | 1 | 1  | 1  | 4  | 3.117 | 0.616 | 1.788 | 1.033 | 8.09  | 5.56  | 2  | 4  | 180  | 19.8  | 5.60 |
| Q96DG6 | Carboxymethylenebutenolidase homolog<br>OS=Homo sapiens<br>GN=CMBL<br>PE=1 SV=1 - [CMBL_HUMAN]               | 25.31 | 1 | 7  | 7  | 14 | 0.725 | 0.950 | 0.898 | 1.033 | 34.52 | 25.31 | 12 | 14 | 245  | 28.0  | 7.18 |

|        |                                                                                                                |       |   |   |   |    |       |       |       |       |       |       |    |      |       |      |      |
|--------|----------------------------------------------------------------------------------------------------------------|-------|---|---|---|----|-------|-------|-------|-------|-------|-------|----|------|-------|------|------|
| Q16394 | Exostosin-1<br>OS=Homo sapiens<br>GN=EXT1<br>PE=1 SV=2 - [EXT1_HUMAN]                                          | 1.61  | 1 | 1 | 1 | 1  | 1.185 | 1.140 | 1.630 | 1.033 | 1.90  | 1.61  | 1  | 1    | 746   | 86.2 | 9.04 |
| O60341 | Lysine-specific histone demethylase 1A<br>OS=Homo sapiens<br>GN=KDM1A<br>PE=1 SV=2 - [KDM1A_HUMAN]             | 2.23  | 1 | 2 | 2 | 7  | 1.671 | 1.050 | 0.676 | 1.034 | 14.71 | 2.23  | 4  | 7    | 852   | 92.8 | 6.52 |
| Q9H0J9 | Poly [ADP-ribose] polymerase 12<br>OS=Homo sapiens<br>GN=PARP12<br>PE=1 SV=1 - [PAR12_HUMAN]                   | 4.99  | 1 | 3 | 3 | 4  | 1.491 | 0.939 | 1.312 | 1.034 | 5.84  | 4.99  | 3  | 4    | 701   | 79.0 | 8.51 |
| Q9UJ68 | Mitochondrial peptide methionine sulfoxide reductase<br>OS=Homo sapiens<br>GN=MSRA<br>PE=1 SV=1 - [MSRA_HUMAN] | 33.62 | 1 | 6 | 6 | 26 | 1.212 | 1.150 | 0.998 | 1.034 | 66.80 | 33.62 | 10 | 26   | 235   | 26.1 | 8.09 |
| Q8WYA6 | Beta-catenin-like protein 1<br>OS=Homo sapiens<br>GN=CTNBL1<br>PE=1 SV=1 - [CTBL1_HUMAN]                       | 18.29 | 1 | 9 | 9 | 14 | 1.014 | 1.184 | 1.027 | 1.034 | 40.74 | 18.29 | 11 | 14   | 563   | 65.1 | 5.05 |
| Q86T65 | Disheveled-associated activator of morphogenesis 2<br>OS=Homo sapiens<br>GN=DAAM2<br>PE=2 SV=3 - [DAAM2_HUMAN] | 0.84  | 1 | 1 | 1 | 1  | 1.454 | 1.453 | 1.034 | 3.34  | 0.84  | 1     | 1  | 1068 | 123.4 | 6.80 |      |
| Q8N8A6 | ATP-dependent RNA helicase DDX51<br>OS=Homo sapiens<br>GN=DDX51<br>PE=1 SV=3 - [DDX51_HUMAN]                   | 2.55  | 1 | 2 | 2 | 6  | 0.749 | 0.730 | 0.823 | 1.034 | 7.51  | 2.55  | 3  | 6    | 666   | 72.4 | 8.16 |
| P09871 | Complement C1s subcomponent<br>OS=Homo sapiens<br>GN=C1S PE=1 SV=1 - [C1S_HUMAN]                               | 5.09  | 1 | 3 | 3 | 6  | 1.095 | 1.048 | 1.127 | 1.034 | 13.23 | 5.09  | 4  | 6    | 688   | 76.6 | 4.96 |
| Q9UMY1 | Nucleolar protein 7<br>OS=Homo sapiens<br>GN=NOL7<br>PE=1 SV=2 - [NOL7_HUMAN]                                  | 10.51 | 1 | 3 | 3 | 8  | 0.738 | 0.958 | 0.959 | 1.034 | 24.94 | 10.51 | 5  | 8    | 257   | 29.4 | 9.67 |

|        |                                                                                                           |       |   |    |    |    |       |       |       |       |        |       |    |    |      |       |       |
|--------|-----------------------------------------------------------------------------------------------------------|-------|---|----|----|----|-------|-------|-------|-------|--------|-------|----|----|------|-------|-------|
| Q96DE0 | U8 snoRNA-decapping enzyme<br>OS=Homo sapiens<br>GN=NUDT16<br>PE=1 SV=2 - [NUDT16_HUMAN]                  | 17.95 | 2 | 4  | 4  | 12 | 0.952 | 0.824 | 1.144 | 1.034 | 23.62  | 17.95 | 8  | 12 | 195  | 21.3  | 6.89  |
| Q99848 | Probable rRNA-processing protein EBP2<br>OS=Homo sapiens<br>GN=EBNA1BP2<br>PE=1 SV=2 - [EBP2_HUMAN]       | 38.89 | 1 | 13 | 13 | 36 | 0.754 | 0.882 | 0.761 | 1.034 | 80.67  | 38.89 | 22 | 36 | 306  | 34.8  | 10.10 |
| O75379 | Vesicle-associated membrane protein 4<br>OS=Homo sapiens<br>GN=VAMP4<br>PE=1 SV=2 - [VAMP4_HUMAN]         | 36.88 | 1 | 4  | 4  | 5  | 0.779 | 0.524 | 1.041 | 1.034 | 18.01  | 36.88 | 4  | 5  | 141  | 16.4  | 7.34  |
| O14795 | Protein unc-13 homolog B<br>OS=Homo sapiens<br>GN=UNC13B<br>PE=1 SV=2 - [UNC13B_HUMAN]                    | 3.02  | 1 | 3  | 4  | 9  | 1.918 | 1.208 | 1.319 | 1.034 | 25.70  | 3.02  | 6  | 9  | 1591 | 180.6 | 5.99  |
| Q92890 | Ubiquitin fusion degradation protein 1 homolog<br>OS=Homo sapiens<br>GN=UFD1L<br>PE=1 SV=3 - [UFD1_HUMAN] | 39.41 | 1 | 10 | 10 | 57 | 1.151 | 0.908 | 1.262 | 1.034 | 167.43 | 39.41 | 19 | 57 | 307  | 34.5  | 6.70  |
| Q96IW7 | Vesicle-trafficking protein SEC22a<br>OS=Homo sapiens<br>GN=SEC22A<br>PE=1 SV=1 - [SEC22A_HUMAN]          | 6.19  | 1 | 2  | 2  | 3  | 1.107 | 0.938 | 1.044 | 1.034 | 5.59   | 6.19  | 2  | 3  | 307  | 34.9  | 8.24  |
| Q53S33 | BolA-like protein 3<br>OS=Homo sapiens<br>GN=BOLA3<br>PE=1 SV=1 - [BOLA3_HUMAN]                           | 34.58 | 1 | 4  | 5  | 5  | 0.784 | 1.000 | 0.974 | 1.035 | 12.75  | 34.58 | 5  | 5  | 107  | 12.1  | 9.64  |
| O76094 | Signal recognition particle subunit SRP72<br>OS=Homo sapiens<br>GN=SRP72<br>PE=1 SV=3 - [SRP72_HUMAN]     | 40.98 | 1 | 25 | 28 | 73 | 0.888 | 0.952 | 0.973 | 1.035 | 169.22 | 40.98 | 38 | 73 | 671  | 74.6  | 9.26  |

|        |                                                                                                                                                                                              |       |   |    |    |    |       |       |       |       |        |       |    |    |      |       |       |
|--------|----------------------------------------------------------------------------------------------------------------------------------------------------------------------------------------------|-------|---|----|----|----|-------|-------|-------|-------|--------|-------|----|----|------|-------|-------|
| Q14C86 | GTPase-activating protein and VPS9 domain-containing protein 1<br>OS=Homo sapiens<br>GN=GAPVD1<br>PE=1 SV=2 - [GAPD1_HUMAN]<br>Peptidyl-trNA hydrolase<br>ICT1, mitochondrial                | 12.72 | 1 | 18 | 18 | 45 | 0.981 | 0.816 | 0.999 | 1.035 | 101.31 | 12.72 | 28 | 45 | 1478 | 164.9 | 5.22  |
| Q14197 | OS=Homo sapiens<br>GN=ICT1 PE=1 SV=1 - [ICT1_HUMAN]<br>G2/mitotic-specific cyclin-B3<br>OS=Homo sapiens<br>GN=CCNB3<br>PE=1 SV=2 - [CCNB3_HUMAN]<br>Ubiquitin carboxyl-terminal hydrolase 16 | 37.38 | 1 | 7  | 7  | 25 | 1.044 | 1.055 | 0.905 | 1.035 | 54.20  | 37.38 | 12 | 25 | 206  | 23.6  | 10.07 |
| Q8WWL7 | OS=Homo sapiens<br>GN=CCNB3<br>PE=1 SV=2 - [CCNB3_HUMAN]<br>Ubiquitin carboxyl-terminal hydrolase 16                                                                                         | 1.86  | 1 | 2  | 2  | 2  | 0.980 | 1.224 | 1.958 | 1.035 | 0.00   | 1.86  | 2  | 2  | 1395 | 157.8 | 6.68  |
| Q9Y5T5 | OS=Homo sapiens<br>GN=USP16<br>PE=1 SV=1 - [UBP16_HUMAN]<br>Aflatoxin B1 aldehyde reductase member 2                                                                                         | 6.20  | 1 | 3  | 4  | 7  | 1.047 | 1.191 | 1.354 | 1.035 | 12.85  | 6.20  | 5  | 7  | 823  | 93.5  | 6.93  |
| O43488 | OS=Homo sapiens<br>GN=AKR7A2<br>PE=1 SV=3 - [ARK72_HUMAN]<br>UPF0687 protein C20orf27<br>OS=Homo sapiens<br>GN=C20orf27<br>PE=1 SV=3 - [CT027_HUMAN]<br>Regulator complex protein<br>LAMTOR1 | 18.66 | 3 | 8  | 8  | 22 | 1.172 | 1.344 | 1.296 | 1.035 | 53.07  | 18.66 | 13 | 22 | 359  | 39.6  | 7.17  |
| Q9GZN8 | OS=Homo sapiens<br>GN=C20orf27<br>PE=1 SV=3 - [CT027_HUMAN]<br>Regulator complex protein<br>LAMTOR1                                                                                          | 4.02  | 1 | 1  | 1  | 2  | 1.084 | 1.234 | 1.386 | 1.035 | 0.00   | 4.02  | 1  | 2  | 174  | 19.3  | 6.84  |
| Q6IAA8 | OS=Homo sapiens<br>GN=LAMTOR1<br>PE=1 SV=2 - [LTOR1_HUMAN]<br>Putative small nuclear ribonucleoprotein G-like                                                                                | 40.37 | 1 | 5  | 5  | 17 | 1.064 | 1.055 | 0.920 | 1.035 | 64.15  | 40.37 | 9  | 17 | 161  | 17.7  | 5.15  |
| A8MWD9 | protein 15<br>OS=Homo sapiens<br>GN=SNRPGP15<br>PE=5 SV=2 - [RUXGL_HUMAN]                                                                                                                    | 27.63 | 2 | 4  | 4  | 21 | 1.059 | 1.124 | 0.752 | 1.035 | 50.88  | 27.63 | 6  | 21 | 76   | 8.5   | 8.84  |

|        |                                                                                                |       |   |    |    |    |       |       |       |       |        |       |    |    |      |       |      |
|--------|------------------------------------------------------------------------------------------------|-------|---|----|----|----|-------|-------|-------|-------|--------|-------|----|----|------|-------|------|
| O00170 | AH receptor-interacting protein<br>OS=Homo sapiens<br>GN=AIP PE=1 SV=2 - [AIP_HUMAN]           | 42.12 | 1 | 12 | 12 | 36 | 1.057 | 0.995 | 0.877 | 1.035 | 81.33  | 42.12 | 17 | 36 | 330  | 37.6  | 6.29 |
| Q8NFB2 | Transmembrane protein 185A<br>OS=Homo sapiens<br>GN=TMEM185A PE=1 SV=2 - [T185A_HUMAN]         | 8.57  | 2 | 2  | 2  | 3  | 1.277 | 0.832 | 1.025 | 1.035 | 5.08   | 8.57  | 2  | 3  | 350  | 40.6  | 7.24 |
| Q8WY64 | E3 ubiquitin-protein ligase MYLIP<br>OS=Homo sapiens<br>GN=MYLIP PE=1 SV=2 - [MYLIP_HUMAN]     | 4.27  | 1 | 2  | 2  | 2  | 0.898 | 1.316 | 0.865 | 1.035 | 1.98   | 4.27  | 2  | 2  | 445  | 49.9  | 7.24 |
| Q96DZ1 | Endoplasmic reticulum lectin 1<br>OS=Homo sapiens<br>GN=ERLEC1 PE=1 SV=1 - [ERLEC_HUMAN]       | 21.33 | 1 | 9  | 9  | 42 | 1.247 | 0.742 | 0.727 | 1.035 | 107.67 | 21.33 | 16 | 42 | 483  | 54.8  | 6.28 |
| Q12846 | Syntaxin-4<br>OS=Homo sapiens<br>GN=STX4 PE=1 SV=2 - [STX4_HUMAN]                              | 42.09 | 1 | 10 | 10 | 51 | 1.452 | 1.154 | 1.067 | 1.035 | 121.37 | 42.09 | 17 | 51 | 297  | 34.2  | 6.28 |
| Q9BX70 | BTB/POZ domain-containing protein 2<br>OS=Homo sapiens<br>GN=BTBD2 PE=1 SV=1 - [BTBD2_HUMAN]   | 4.19  | 1 | 2  | 2  | 2  | 1.067 | 0.774 | 0.720 | 1.036 | 3.27   | 4.19  | 2  | 2  | 525  | 55.9  | 5.90 |
| P23458 | Tyrosine-protein kinase JAK1<br>OS=Homo sapiens<br>GN=JAK1 PE=1 SV=2 - [JAK1_HUMAN]            | 13.00 | 3 | 12 | 14 | 27 | 1.136 | 0.981 | 0.964 | 1.036 | 51.41  | 13.00 | 18 | 27 | 1154 | 133.2 | 7.55 |
| P0CG23 | Zinc finger protein 853<br>OS=Homo sapiens<br>GN=ZNF853 PE=2 SV=1 - [ZNF853_HUMAN]             | 1.97  | 1 | 1  | 1  | 1  | 0.724 | 1.210 | 1.298 | 1.036 | 2.56   | 1.97  | 1  | 1  | 659  | 74.8  | 5.25 |
| Q9UJX6 | Anaphase-promoting complex subunit 2<br>OS=Homo sapiens<br>GN=ANAPC2 PE=1 SV=1 - [ANPC2_HUMAN] | 10.10 | 1 | 5  | 5  | 7  | 1.012 | 1.130 | 0.993 | 1.036 | 19.11  | 10.10 | 6  | 7  | 822  | 93.8  | 5.22 |



|        |                                                                                                                         |       |   |    |    |    |       |       |       |       |        |       |    |    |      |       |      |
|--------|-------------------------------------------------------------------------------------------------------------------------|-------|---|----|----|----|-------|-------|-------|-------|--------|-------|----|----|------|-------|------|
| Q6ZM20 | E3 ubiquitin-protein ligase<br>RNF19B<br>OS=Homo sapiens<br>GN=RNF19B<br>PE=1 SV=2 - [RNF19B_HUMAN]                     | 1.64  | 1 | 1  | 1  | 1  | 1.109 | 1.614 | 1.677 | 1.036 | 2.40   | 1.64  | 1  | 1  | 732  | 77.9  | 6.19 |
| Q9HIK1 | Iron-sulfur cluster assembly enzyme ISCU, mitochondrial<br>OS=Homo sapiens<br>GN=ISCU PE=1 SV=2 - [ISCU_HUMAN]          | 30.54 | 1 | 6  | 6  | 11 | 0.882 | 1.205 | 1.190 | 1.036 | 31.68  | 30.54 | 8  | 11 | 167  | 18.0  | 9.48 |
| Q8N511 | Transmembrane protein 199<br>OS=Homo sapiens<br>GN=TMEM199<br>PE=1 SV=1 - [TM199_HUMAN]                                 | 7.21  | 1 | 2  | 2  | 9  | 0.931 | 0.797 | 1.006 | 1.036 | 17.21  | 7.21  | 3  | 9  | 208  | 23.1  | 9.01 |
| Q63HM1 | Kynurenine formamidase<br>OS=Homo sapiens<br>GN=AFMID<br>PE=2 SV=2 - [KFA_HUMAN]                                        | 2.64  | 1 | 1  | 1  | 6  | 1.027 | 1.028 | 1.362 | 1.036 | 12.24  | 2.64  | 2  | 6  | 303  | 34.0  | 5.91 |
| Q5XXA6 | Anoctamin-1<br>OS=Homo sapiens<br>GN=ANO1<br>PE=1 SV=1 - [ANO1_HUMAN]                                                   | 10.45 | 2 | 8  | 10 | 24 | 0.590 | 0.608 | 1.998 | 1.036 | 65.10  | 10.45 | 14 | 24 | 986  | 114.0 | 8.54 |
| P11310 | Medium-chain specific acyl-CoA dehydrogenase, mitochondrial<br>OS=Homo sapiens<br>GN=ACADM<br>PE=1 SV=1 - [ACADM_HUMAN] | 26.37 | 1 | 11 | 11 | 29 | 0.867 | 1.406 | 0.999 | 1.036 | 67.21  | 26.37 | 19 | 29 | 421  | 46.6  | 8.37 |
| O60610 | Protein diaphanous homolog 1<br>OS=Homo sapiens<br>GN=DIAPH1<br>PE=1 SV=2 - [DIAP1_HUMAN]                               | 12.97 | 1 | 16 | 17 | 42 | 0.968 | 1.425 | 1.028 | 1.036 | 102.40 | 12.97 | 23 | 42 | 1272 | 141.3 | 5.41 |
| Q9BYC5 | Alpha-(1,6)-fucosyltransferase<br>OS=Homo sapiens<br>GN=FUT8<br>PE=1 SV=2 - [FUT8_HUMAN]                                | 2.96  | 1 | 2  | 2  | 5  | 1.018 | 1.202 | 0.991 | 1.036 | 6.80   | 2.96  | 3  | 5  | 575  | 66.5  | 7.66 |
| Q8N584 | Tetratricopeptide repeat protein 39C<br>OS=Homo sapiens<br>GN=TTC39C<br>PE=2 SV=2 - [TT39C_HUMAN]                       | 3.43  | 1 | 2  | 2  | 5  | 1.468 | 0.894 | 0.927 | 1.036 | 7.54   | 3.43  | 3  | 5  | 583  | 65.8  | 6.99 |

|        |                                                                                                                  |       |   |    |    |     |       |       |       |       |        |       |    |     |     |      |      |
|--------|------------------------------------------------------------------------------------------------------------------|-------|---|----|----|-----|-------|-------|-------|-------|--------|-------|----|-----|-----|------|------|
| P54709 | Sodium/potassium-transporting ATPase subunit beta-3<br>OS=Homo sapiens<br>GN=ATP1B3<br>PE=1 SV=1 - [AT1B3_HUMAN] | 35.84 | 1 | 11 | 11 | 33  | 1.520 | 0.653 | 0.591 | 1.036 | 79.81  | 35.84 | 17 | 33  | 279 | 31.5 | 8.35 |
| P13693 | Translationally-controlled tumor protein<br>OS=Homo sapiens<br>GN=TPT1<br>PE=1 SV=1 - [TCTP_HUMAN]               | 44.19 | 3 | 9  | 9  | 206 | 0.922 | 0.790 | 0.952 | 1.036 | 575.52 | 44.19 | 15 | 206 | 172 | 19.6 | 4.93 |
| Q92551 | Inositol hexakisphosphate kinase 1<br>OS=Homo sapiens<br>GN=IP6K1<br>PE=1 SV=3 - [IP6K1_HUMAN]                   | 3.17  | 1 | 1  | 1  | 1   | 1.199 | 0.921 | 1.321 | 1.037 | 3.68   | 3.17  | 1  | 1   | 441 | 50.2 | 7.24 |
| H0Y7S4 | Putative PRAME family member 26<br>OS=Homo sapiens<br>GN=PRAMEF26<br>PE=3 SV=2 - [PRA26_HUMAN]                   | 1.83  | 8 | 1  | 1  | 1   | 1.260 | 1.374 | 1.476 | 1.037 | 1.88   | 1.83  | 1  | 1   | 382 | 44.3 | 8.28 |
| Q6ZNW5 | GDP-D-glucose phosphorylase 1<br>OS=Homo sapiens<br>GN=GDPGP1<br>PE=1 SV=2 - [GDPP1_HUMAN]                       | 7.53  | 1 | 2  | 2  | 4   | 0.880 | 1.130 | 1.044 | 1.037 | 5.73   | 7.53  | 4  | 4   | 385 | 42.3 | 6.47 |
| P09661 | U2 small nuclear ribonucleoprotein A'<br>OS=Homo sapiens<br>GN=SNRPA1<br>PE=1 SV=2 - [RUZA_HUMAN]                | 31.76 | 1 | 8  | 8  | 36  | 1.013 | 1.322 | 1.021 | 1.037 | 67.56  | 31.76 | 15 | 36  | 255 | 28.4 | 8.62 |
| Q8IUC8 | Polypeptide N-acetylgalactosaminyltransferase 13<br>OS=Homo sapiens<br>GN=GALNT13<br>PE=2 SV=2 - [GLT13_HUMAN]   | 2.88  | 1 | 1  | 2  | 3   | 1.823 | 1.192 | 0.664 | 1.037 | 7.00   | 2.88  | 2  | 3   | 556 | 64.0 | 6.83 |
| P07108 | Acyl-CoA-binding protein<br>OS=Homo sapiens<br>GN=DBI<br>PE=1 SV=2 - [ACBP_HUMAN]                                | 75.86 | 1 | 8  | 9  | 128 | 1.062 | 1.062 | 1.012 | 1.037 | 283.29 | 75.86 | 14 | 128 | 87  | 10.0 | 6.57 |
| Q6VN20 | Ran-binding protein 10<br>OS=Homo sapiens<br>GN=RANBP10<br>PE=1 SV=1 - [RBP10_HUMAN]                             | 10.48 | 1 | 3  | 3  | 7   | 1.062 | 1.225 | 1.189 | 1.037 | 17.53  | 10.48 | 4  | 7   | 620 | 67.2 | 6.77 |

|        |                                                                                                                            |       |   |    |    |    |       |       |       |       |        |       |    |    |      |       |      |
|--------|----------------------------------------------------------------------------------------------------------------------------|-------|---|----|----|----|-------|-------|-------|-------|--------|-------|----|----|------|-------|------|
| Q96EG3 | Zinc finger protein 837<br>OS=Homo sapiens<br>GN=ZNF837<br>PE=2 SV=2 - [ZNF837_HUMAN]                                      | 2.07  | 1 | 1  | 1  | 1  | 1.199 | 1.086 | 2.476 | 1.037 | 2.51   | 2.07  | 1  | 1  | 531  | 58.0  | 9.25 |
| P61006 | Ras-related protein Rab-8A<br>OS=Homo sapiens<br>GN=RAB8A<br>PE=1 SV=1 - [RAB8A_HUMAN]                                     | 47.83 | 2 | 5  | 12 | 85 | 1.234 | 0.991 | 0.855 | 1.037 | 191.20 | 47.83 | 20 | 85 | 207  | 23.7  | 9.07 |
| A1L188 | Uncharacterized protein C17orf89<br>OS=Homo sapiens<br>GN=C17orf89<br>PE=2 SV=1 - [CQ089_HUMAN]                            | 14.86 | 1 | 1  | 1  | 12 | 0.751 | 0.734 | 0.930 | 1.037 | 34.82  | 14.86 | 1  | 12 | 74   | 7.8   | 9.32 |
| O15431 | High affinity copper uptake protein 1<br>OS=Homo sapiens<br>GN=SLC31A1<br>PE=1 SV=1 - [COPT1_HUMAN]                        | 10.00 | 1 | 1  | 1  | 4  | 1.507 | 0.686 | 0.825 | 1.037 | 10.60  | 10.00 | 2  | 4  | 190  | 21.1  | 7.42 |
| Q8TB96 | T-cell immunomodulatory protein<br>OS=Homo sapiens<br>GN=ITFG1<br>PE=1 SV=1 - [TIP_HUMAN]                                  | 3.92  | 1 | 3  | 3  | 5  | 0.946 | 0.795 | 1.142 | 1.037 | 8.11   | 3.92  | 3  | 5  | 612  | 68.1  | 5.39 |
| P10644 | cAMP-dependent protein kinase type I-alpha regulatory subunit<br>OS=Homo sapiens<br>GN=PRKAR1A<br>PE=1 SV=1 - [KAP0_HUMAN] | 47.24 | 1 | 14 | 17 | 65 | 0.931 | 1.147 | 1.221 | 1.038 | 185.37 | 47.24 | 25 | 65 | 381  | 43.0  | 5.35 |
| Q460N5 | Poly [ADP-ribose] polymerase 14<br>OS=Homo sapiens<br>GN=PARP14<br>PE=1 SV=3 - [PAR14_HUMAN]                               | 4.78  | 1 | 9  | 9  | 14 | 2.290 | 1.148 | 1.029 | 1.038 | 23.80  | 4.78  | 13 | 14 | 1801 | 202.7 | 7.18 |
| A1A5D9 | Bicaudal D-related protein 2<br>OS=Homo sapiens<br>GN=CCDC64B<br>PE=2 SV=2 - [BICR2_HUMAN]                                 | 8.07  | 1 | 2  | 3  | 5  | 1.793 | 0.694 | 1.499 | 1.038 | 7.96   | 8.07  | 3  | 5  | 508  | 56.8  | 5.02 |

|        |                                                                                                                                                 |       |   |    |    |    |       |       |       |       |        |       |    |    |      |       |      |
|--------|-------------------------------------------------------------------------------------------------------------------------------------------------|-------|---|----|----|----|-------|-------|-------|-------|--------|-------|----|----|------|-------|------|
| P18031 | Tyrosine-<br>protein<br>phosphatase<br>non-receptor<br>type 1<br>OS=Homo<br>sapiens<br>GN=PTPN1<br>PE=1 SV=1 -<br>[PTN1_HUMAN]                  | 34.02 | 1 | 14 | 14 | 51 | 1.184 | 0.611 | 1.128 | 1.038 | 133.34 | 34.02 | 20 | 51 | 435  | 49.9  | 6.27 |
| Q86UU1 | Pleckstrin<br>homology-like<br>domain family<br>B member 1<br>OS=Homo<br>sapiens<br>GN=PHLDB1<br>PE=1 SV=1 -<br>[PHLB1_HUMAN<br>]               | 23.38 | 1 | 28 | 29 | 97 | 0.932 | 1.197 | 1.097 | 1.038 | 217.37 | 23.38 | 49 | 97 | 1377 | 151.1 | 8.63 |
| P19447 | TFIIH basal<br>transcription<br>factor complex<br>helicase XPB<br>subunit<br>OS=Homo<br>sapiens<br>GN=ERCC3<br>PE=1 SV=1 -<br>[ERCC3_HUMAN<br>] | 4.73  | 1 | 3  | 3  | 4  | 0.844 | 1.226 | 0.810 | 1.038 | 11.30  | 4.73  | 3  | 4  | 782  | 89.2  | 7.23 |
| O14641 | Segment<br>polarity protein<br>dishevelled<br>homolog DVL-2<br>OS=Homo<br>sapiens<br>GN=DVL2 PE=1<br>SV=1 -<br>[DVL2_HUMAN]                     | 10.87 | 1 | 6  | 6  | 18 | 1.070 | 1.273 | 1.271 | 1.038 | 39.27  | 10.87 | 10 | 18 | 736  | 78.9  | 6.02 |
| O75386 | Tubby-related<br>protein 3<br>OS=Homo<br>sapiens<br>GN=TULP3<br>PE=1 SV=2 -<br>[TULP3_HUMAN<br>]                                                | 5.88  | 1 | 3  | 3  | 9  | 1.129 | 0.916 | 1.123 | 1.038 | 24.98  | 5.88  | 5  | 9  | 442  | 49.6  | 7.74 |
| O95989 | Diphosphoinosit<br>ol<br>polyphosphate<br>phosphohydroly<br>ase 1<br>OS=Homo<br>sapiens<br>GN=NUDT3<br>PE=1 SV=1 -<br>[NUDT3_HUMAN<br>]         | 30.81 | 1 | 4  | 5  | 10 | 1.077 | 1.077 | 0.968 | 1.038 | 29.31  | 30.81 | 6  | 10 | 172  | 19.5  | 6.34 |
| O60942 | mRNA-capping<br>enzyme<br>OS=Homo<br>sapiens<br>GN=RNGTT<br>PE=1 SV=1 -<br>[MCE1_HUMAN]                                                         | 1.01  | 1 | 1  | 1  | 1  | 1.414 | 0.927 | 1.211 | 1.038 | 2.23   | 1.01  | 1  | 1  | 597  | 68.5  | 8.13 |
| Q14257 | Reticulocalbin-2<br>OS=Homo<br>sapiens<br>GN=RCN2<br>PE=1 SV=1 -<br>[RCN2_HUMAN]                                                                | 54.57 | 1 | 14 | 15 | 46 | 1.121 | 0.904 | 0.900 | 1.038 | 152.13 | 54.57 | 20 | 46 | 317  | 36.9  | 4.40 |

|        |                                                                                                                                              |       |   |    |    |    |       |       |       |       |       |       |    |    |      |       |      |
|--------|----------------------------------------------------------------------------------------------------------------------------------------------|-------|---|----|----|----|-------|-------|-------|-------|-------|-------|----|----|------|-------|------|
| Q96BY7 | Autophagy-related protein 2 homolog B<br>OS=Homo sapiens<br>GN=ATG2B<br>PE=1 SV=5 - [ATG2B_HUMAN]                                            | 5.29  | 1 | 8  | 8  | 10 | 1.223 | 0.795 | 1.209 | 1.038 | 15.80 | 5.29  | 10 | 10 | 2078 | 232.6 | 5.76 |
| A6NI56 | Coiled-coil domain-containing protein 154<br>OS=Homo sapiens<br>GN=CCDC154<br>PE=2 SV=4 - [CC154_HUMAN]                                      | 1.19  | 1 | 1  | 1  | 1  | 0.716 | 1.068 | 0.843 | 1.039 | 0.00  | 1.19  | 1  | 1  | 674  | 76.0  | 8.38 |
| Q8NBX0 | Saccharopine dehydrogenase-like oxidoreductase<br>OS=Homo sapiens<br>GN=SCCPDH<br>PE=1 SV=1 - [SCPDL_HUMAN]                                  | 17.48 | 1 | 6  | 6  | 25 | 1.045 | 1.269 | 0.987 | 1.039 | 59.58 | 17.48 | 10 | 25 | 429  | 47.1  | 9.14 |
| Q13362 | Serine/threonine-protein phosphatase 2A 56 kDa regulatory subunit gamma isoform<br>OS=Homo sapiens<br>GN=PPP2R5C<br>PE=1 SV=3 - [2A5G_HUMAN] | 14.89 | 1 | 3  | 7  | 25 | 1.276 | 0.904 | 0.902 | 1.039 | 44.93 | 14.89 | 12 | 25 | 524  | 61.0  | 6.87 |
| Q9HB40 | Retinoid-inducible serine carboxypeptidase<br>OS=Homo sapiens<br>GN=SCPEP1<br>PE=1 SV=1 - [RISC_HUMAN]                                       | 19.91 | 1 | 9  | 9  | 30 | 0.972 | 0.888 | 1.066 | 1.039 | 72.77 | 19.91 | 12 | 30 | 452  | 50.8  | 5.81 |
| Q86XL3 | Ankyrin repeat and LEM domain-containing protein 2<br>OS=Homo sapiens<br>GN=ANKLE2<br>PE=1 SV=4 - [ANKL2_HUMAN]                              | 21.22 | 1 | 15 | 15 | 42 | 0.847 | 0.886 | 1.011 | 1.039 | 65.03 | 21.22 | 24 | 42 | 938  | 104.0 | 7.09 |
| Q96AX9 | E3 ubiquitin-protein ligase MIB2<br>OS=Homo sapiens<br>GN=MIB2<br>PE=1 SV=3 - [MIB2_HUMAN]                                                   | 4.24  | 1 | 3  | 4  | 6  | 1.155 | 1.159 | 1.429 | 1.039 | 9.08  | 4.24  | 5  | 6  | 1013 | 109.9 | 8.44 |

|        |                                                                                                                              |       |   |    |    |     |       |       |       |       |        |       |    |     |      |       |       |
|--------|------------------------------------------------------------------------------------------------------------------------------|-------|---|----|----|-----|-------|-------|-------|-------|--------|-------|----|-----|------|-------|-------|
| P36873 | Serine/threonine-protein phosphatase PP1-gamma catalytic subunit<br>OS=Homo sapiens<br>GN=PPP1CC<br>PE=1 SV=1 - [PP1G_HUMAN] | 45.82 | 1 | 3  | 13 | 84  | 0.923 | 0.964 | 1.041 | 1.039 | 229.33 | 45.82 | 22 | 84  | 323  | 37.0  | 6.54  |
| Q14004 | Cyclin-dependent kinase 13<br>OS=Homo sapiens<br>GN=CDK13<br>PE=1 SV=2 - [CDK13_HUMAN]                                       | 3.77  | 6 | 4  | 6  | 16  | 0.654 | 0.900 | 0.864 | 1.039 | 29.84  | 3.77  | 7  | 16  | 1512 | 164.8 | 9.69  |
| A6QL64 | Ankyrin repeat domain-containing protein 36A<br>OS=Homo sapiens<br>GN=ANKRD36<br>PE=2 SV=3 - [AN36A_HUMAN]                   | 0.36  | 1 | 1  | 1  | 1   | 1.133 | 1.113 | 1.104 | 1.039 | 2.42   | 0.36  | 1  | 1   | 1941 | 217.3 | 8.66  |
| Q15050 | Ribosome biogenesis regulatory protein homolog<br>OS=Homo sapiens<br>GN=RRS1<br>PE=1 SV=2 - [RRS1_HUMAN]                     | 27.40 | 1 | 8  | 8  | 26  | 0.649 | 1.129 | 0.791 | 1.039 | 55.69  | 27.40 | 13 | 26  | 365  | 41.2  | 10.70 |
| Q96A57 | Transmembrane protein 230<br>OS=Homo sapiens<br>GN=TMEM230<br>PE=1 SV=1 - [TM230_HUMAN]                                      | 9.17  | 1 | 1  | 1  | 6   | 0.648 | 0.906 | 0.929 | 1.040 | 11.96  | 9.17  | 2  | 6   | 120  | 13.2  | 9.31  |
| P84098 | 60S ribosomal protein L19<br>OS=Homo sapiens<br>GN=RPL19<br>PE=1 SV=1 - [RL19_HUMAN]                                         | 39.29 | 1 | 10 | 11 | 139 | 0.701 | 1.023 | 0.907 | 1.040 | 284.92 | 39.29 | 16 | 139 | 196  | 23.5  | 11.47 |
| Q6NUQ4 | Transmembrane protein 214<br>OS=Homo sapiens<br>GN=TMEM214<br>PE=1 SV=2 - [TM214_HUMAN]                                      | 22.79 | 1 | 15 | 15 | 58  | 0.935 | 1.140 | 0.938 | 1.040 | 113.00 | 22.79 | 24 | 58  | 689  | 77.1  | 9.14  |
| Q3T906 | N-acetylglucosamine-1-phosphotransferase subunits alpha/beta<br>OS=Homo sapiens<br>GN=GNPTAB<br>PE=1 SV=1 - [GNPTA_HUMAN]    | 0.64  | 1 | 1  | 1  | 2   | 0.794 | 0.961 | 1.328 | 1.040 | 1.92   | 0.64  | 2  | 2   | 1256 | 143.5 | 7.17  |

|        |                                                                                                                         |       |   |    |    |    |       |       |       |       |        |       |    |    |      |       |      |
|--------|-------------------------------------------------------------------------------------------------------------------------|-------|---|----|----|----|-------|-------|-------|-------|--------|-------|----|----|------|-------|------|
| Q14160 | Protein scribble homolog<br>OS=Homo sapiens<br>GN=SCRIB<br>PE=1 SV=4 - [SCRIB_HUMAN]                                    | 12.09 | 1 | 13 | 18 | 52 | 1.117 | 1.252 | 1.108 | 1.040 | 126.51 | 12.09 | 29 | 52 | 1630 | 174.8 | 5.07 |
| O15397 | Importin-8<br>OS=Homo sapiens<br>GN=IPO8<br>PE=1 SV=2 - [IPO8_HUMAN]                                                    | 6.46  | 1 | 6  | 6  | 11 | 0.819 | 1.030 | 1.260 | 1.040 | 33.92  | 6.46  | 8  | 11 | 1037 | 119.9 | 5.16 |
| Q5SNT6 | WASH complex subunit<br>FAM21B<br>OS=Homo sapiens<br>GN=FAM21B<br>PE=2 SV=2 - [FA21B_HUMAN]                             | 28.89 | 2 | 6  | 25 | 74 | 1.117 | 1.192 | 1.024 | 1.040 | 187.62 | 28.89 | 40 | 74 | 1253 | 136.9 | 4.82 |
| Q9NZM4 | Glioma tumor suppressor candidate region gene 1 protein<br>OS=Homo sapiens<br>GN=GLTSCR1<br>PE=1 SV=2 - [GSCR1_HUMAN]   | 3.40  | 1 | 3  | 3  | 3  | 0.919 | 0.851 | 1.246 | 1.040 | 5.10   | 3.40  | 3  | 3  | 1560 | 158.4 | 6.65 |
| P09012 | U1 small nuclear ribonucleoprotein A<br>OS=Homo sapiens<br>GN=SNRPA<br>PE=1 SV=3 -                                      | 27.30 | 1 | 6  | 8  | 71 | 0.859 | 1.042 | 1.002 | 1.040 | 158.53 | 27.30 | 16 | 71 | 282  | 31.3  | 9.83 |
| Q8IY81 | pre-rRNA processing protein FTSJ3<br>OS=Homo sapiens<br>GN=FTSJ3<br>PE=1 SV=2 - [SPB1_HUMAN]                            | 17.36 | 1 | 15 | 15 | 42 | 0.829 | 1.067 | 0.904 | 1.040 | 108.30 | 17.36 | 23 | 42 | 847  | 96.5  | 8.40 |
| P53384 | Cytosolic Fe-S cluster assembly factor<br>NUBP1<br>OS=Homo sapiens<br>GN=NUBP1<br>PE=1 SV=2 - [NUBP1_HUMAN]             | 18.13 | 1 | 4  | 4  | 5  | 1.145 | 1.341 | 1.052 | 1.040 | 11.48  | 18.13 | 5  | 5  | 320  | 34.5  | 5.33 |
| P09914 | Interferon-induced protein with tetratricopeptide repeats 1<br>OS=Homo sapiens<br>GN=IFIT1<br>PE=1 SV=2 - [IFIT1_HUMAN] | 18.41 | 2 | 7  | 9  | 28 | 6.339 | 1.268 | 2.217 | 1.040 | 69.49  | 18.41 | 15 | 28 | 478  | 55.3  | 7.20 |
| Q12874 | Splicing factor 3A subunit 3<br>OS=Homo sapiens<br>GN=SF3A3<br>PE=1 SV=1 - [SF3A3_HUMAN]                                | 32.34 | 1 | 12 | 12 | 50 | 1.043 | 1.189 | 0.891 | 1.040 | 137.19 | 32.34 | 21 | 50 | 501  | 58.8  | 5.38 |

|        |                                                                                                                          |       |   |    |    |     |       |       |       |       |        |       |    |     |      |       |       |
|--------|--------------------------------------------------------------------------------------------------------------------------|-------|---|----|----|-----|-------|-------|-------|-------|--------|-------|----|-----|------|-------|-------|
| Q9UBW8 | COP9<br>signalosome<br>complex<br>subunit 7a<br>OS=Homo<br>sapiens<br>GN=COPS7A<br>PE=1 SV=1 -<br>[CSN7A_HUMAN<br>]      | 45.09 | 1 | 11 | 11 | 26  | 0.916 | 1.153 | 1.080 | 1.040 | 45.42  | 45.09 | 17 | 26  | 275  | 30.3  | 8.22  |
| Q6UVJ0 | Spindle<br>assembly<br>abnormal<br>protein 6<br>homolog<br>OS=Homo<br>sapiens<br>GN=SASS6<br>PE=1 SV=1 -<br>[SAS6_HUMAN] | 5.18  | 1 | 1  | 4  | 8   | 1.059 | 0.908 | 0.851 | 1.041 | 11.73  | 5.18  | 4  | 8   | 657  | 74.4  | 7.55  |
| Q99541 | Perilipin-2<br>OS=Homo<br>sapiens<br>GN=PLIN2<br>PE=1 SV=2 -<br>[PLIN2_HUMAN]                                            | 45.77 | 1 | 17 | 18 | 70  | 0.275 | 0.933 | 0.919 | 1.041 | 187.74 | 45.77 | 29 | 70  | 437  | 48.0  | 6.80  |
| P41229 | Lysine-specific<br>demethylase<br>5C OS=Homo<br>sapiens<br>GN=KDM5C<br>PE=1 SV=2 -<br>[KDM5C_HUMAN<br>]                  | 2.82  | 1 | 3  | 3  | 7   | 1.427 | 1.163 | 1.266 | 1.041 | 2.64   | 2.82  | 3  | 7   | 1560 | 175.6 | 5.58  |
| Q8IVF7 | Formin-like<br>protein 3<br>OS=Homo<br>sapiens<br>GN=FMNL3<br>PE=1 SV=3 -<br>[FMNL3_HUMAN<br>]                           | 4.96  | 2 | 4  | 6  | 12  | 1.120 | 0.995 | 1.239 | 1.041 | 24.91  | 4.96  | 8  | 12  | 1028 | 117.1 | 6.65  |
| Q5XKP0 | Protein QIL1<br>OS=Homo<br>sapiens<br>GN=QIL1 PE=1<br>SV=1 -<br>[QIL1_HUMAN]                                             | 5.93  | 1 | 1  | 1  | 4   | 1.081 | 1.008 | 0.722 | 1.041 | 8.63   | 5.93  | 2  | 4   | 118  | 13.1  | 9.42  |
| P39019 | 40S ribosomal<br>protein S19<br>OS=Homo<br>sapiens<br>GN=RPS19<br>PE=1 SV=2 -<br>[RS19_HUMAN]                            | 54.48 | 1 | 13 | 13 | 250 | 0.906 | 0.948 | 1.020 | 1.041 | 532.73 | 54.48 | 25 | 250 | 145  | 16.1  | 10.32 |
| O00468 | Agrin<br>OS=Homo<br>sapiens<br>GN=AGRN<br>PE=1 SV=5 -<br>[AGRIN_HUMAN<br>]                                               | 3.19  | 1 | 7  | 7  | 14  | 1.084 | 0.784 | 1.450 | 1.041 | 20.59  | 3.19  | 10 | 14  | 2067 | 217.1 | 6.39  |
| P57053 | Histone H2B<br>type F-S<br>OS=Homo<br>sapiens<br>GN=H2BFS<br>PE=1 SV=2 -<br>[H2BFS_HUMAN<br>]                            | 66.67 | 1 | 1  | 12 | 420 | 1.164 | 1.230 | 0.599 | 1.041 | 924.28 | 66.67 | 22 | 420 | 126  | 13.9  | 10.37 |



|        |                                                                                                           |       |   |    |     |     |       |       |       |       |         |       |     |     |      |       |      |
|--------|-----------------------------------------------------------------------------------------------------------|-------|---|----|-----|-----|-------|-------|-------|-------|---------|-------|-----|-----|------|-------|------|
| Q99590 | Protein<br>SCAF11<br>OS=Homo sapiens<br>GN=SCAF11<br>PE=1 SV=2 - [SCAFB_HUMAN]                            | 2.26  | 1 | 4  | 4   | 13  | 0.978 | 1.038 | 0.795 | 1.041 | 22.01   | 2.26  | 6   | 13  | 1463 | 164.6 | 8.41 |
| Q86UP2 | Kinectin<br>OS=Homo sapiens<br>GN=KTN1<br>PE=1 SV=1 - [KTN1_HUMAN]                                        | 66.47 | 2 | 98 | 100 | 426 | 1.031 | 1.029 | 0.948 | 1.041 | 1062.22 | 66.47 | 158 | 426 | 1357 | 156.2 | 5.64 |
| Q8NCH0 | Carbohydrate sulfotransferase 14<br>OS=Homo sapiens<br>GN=CHST14<br>PE=1 SV=2 - [CHSTE_HUMAN]             | 7.18  | 1 | 3  | 3   | 15  | 0.943 | 0.552 | 0.638 | 1.041 | 33.01   | 7.18  | 5   | 15  | 376  | 43.0  | 9.48 |
| Q9BYD3 | 39S ribosomal protein L4, mitochondrial<br>OS=Homo sapiens<br>GN=MRPL4<br>PE=1 SV=1 - [RMO4_HUMAN]        | 12.54 | 1 | 3  | 4   | 15  | 0.775 | 1.078 | 0.881 | 1.042 | 26.72   | 12.54 | 6   | 15  | 311  | 34.9  | 9.72 |
| Q7KZ17 | Serine/threonine-protein kinase MARK2<br>OS=Homo sapiens<br>GN=MARK2<br>PE=1 SV=2 - [MARK2_HUMAN]         | 3.93  | 1 | 2  | 4   | 4   | 1.540 | 0.962 | 1.050 | 1.042 | 6.70    | 3.93  | 4   | 4   | 788  | 87.9  | 9.72 |
| Q96EY4 | Translation machinery-associated protein 16<br>OS=Homo sapiens<br>GN=TMA16<br>PE=1 SV=2 - [TMA16_HUMAN]   | 4.43  | 1 | 1  | 1   | 2   | 1.167 | 0.964 | 0.836 | 1.042 | 2.95    | 4.43  | 2   | 2   | 203  | 23.8  | 9.26 |
| Q9H3N1 | Thioredoxin-related transmembrane protein 1<br>OS=Homo sapiens<br>GN=TMX1<br>PE=1 SV=1 - [TMX1_HUMAN]     | 26.43 | 1 | 10 | 10  | 60  | 1.022 | 0.766 | 0.658 | 1.042 | 139.02  | 26.43 | 17  | 60  | 280  | 31.8  | 4.98 |
| Q9Y2G3 | Probable phospholipid-transporting ATPase IF<br>OS=Homo sapiens<br>GN=ATP11B<br>PE=1 SV=2 - [AT11B_HUMAN] | 3.65  | 1 | 4  | 4   | 6   | 1.293 | 0.857 | 0.860 | 1.042 | 15.22   | 3.65  | 6   | 6   | 1177 | 134.1 | 6.96 |
| A4D1E9 | GTP-binding protein 10<br>OS=Homo sapiens<br>GN=GTPBP10<br>PE=1 SV=1 - [GTPBA_HUMAN]                      | 2.84  | 1 | 1  | 1   | 2   | 0.494 | 1.243 | 1.221 | 1.042 | 0.00    | 2.84  | 2   | 2   | 387  | 42.9  | 9.03 |

|        |                                                                                                         |       |   |    |    |     |       |       |       |       |        |       |    |     |     |       |       |
|--------|---------------------------------------------------------------------------------------------------------|-------|---|----|----|-----|-------|-------|-------|-------|--------|-------|----|-----|-----|-------|-------|
| Q60127 | ALS2 C-terminal-like protein<br>OS=Homo sapiens<br>GN=ALS2CL<br>PE=1 SV=1 - [ALS2CL_HUMAN]              | 0.73  | 1 | 1  | 1  | 2   | 4.998 | 0.991 | 1.668 | 1.042 | 5.09   | 0.73  | 1  | 2   | 953 | 107.7 | 6.15  |
| Q8N9R8 | Protein SCAI<br>OS=Homo sapiens<br>GN=SCAI PE=1 SV=2 - [SCAI_HUMAN]                                     | 2.48  | 1 | 1  | 1  | 2   | 1.030 | 0.961 | 1.095 | 1.042 | 6.33   | 2.48  | 2  | 2   | 606 | 70.4  | 8.60  |
| Q9Y2C4 | Nudease EXOG, mitochondrial<br>OS=Homo sapiens<br>GN=EXOG<br>PE=1 SV=2 - [EXOG_HUMAN]                   | 6.79  | 1 | 2  | 3  | 7   | 1.062 | 1.095 | 1.137 | 1.042 | 16.69  | 6.79  | 4  | 7   | 368 | 41.1  | 8.27  |
| P82914 | 28S ribosomal protein S15, mitochondrial<br>OS=Homo sapiens<br>GN=MRPS15<br>PE=1 SV=1 - [RT15_HUMAN]    | 14.40 | 2 | 5  | 5  | 15  | 0.917 | 0.913 | 0.719 | 1.042 | 28.87  | 14.40 | 7  | 15  | 257 | 29.8  | 10.48 |
| Q9Y2B0 | Protein canopy homolog 2<br>OS=Homo sapiens<br>GN=CNPY2<br>PE=1 SV=1 - [CNPY2_HUMAN]                    | 61.54 | 1 | 11 | 11 | 80  | 0.802 | 0.989 | 0.932 | 1.042 | 183.02 | 61.54 | 20 | 80  | 182 | 20.6  | 4.92  |
| Q96TC7 | Regulator of microtubule dynamics protein 3<br>OS=Homo sapiens<br>GN=RMDN3<br>PE=1 SV=2 - [RMD3_HUMAN]  | 30.00 | 1 | 10 | 10 | 32  | 1.349 | 0.733 | 0.752 | 1.042 | 92.94  | 30.00 | 14 | 32  | 470 | 52.1  | 5.10  |
| Q9NP80 | Calcium-independent phospholipase A2-gamma<br>OS=Homo sapiens<br>GN=PNPLA8<br>PE=1 SV=1 - [PLPL8_HUMAN] | 7.42  | 2 | 4  | 7  | 12  | 0.931 | 0.901 | 1.106 | 1.042 | 19.59  | 7.42  | 9  | 12  | 782 | 88.4  | 9.23  |
| P30086 | Phosphatidylethanolamine-binding protein 1<br>OS=Homo sapiens<br>GN=PEBP1<br>PE=1 SV=3 - [PEBP1_HUMAN]  | 81.28 | 1 | 12 | 12 | 212 | 1.176 | 1.002 | 1.100 | 1.042 | 419.47 | 81.28 | 20 | 212 | 187 | 21.0  | 7.53  |

|        |                                                                                                                              |       |   |    |    |    |       |       |       |       |       |       |    |    |      |       |      |
|--------|------------------------------------------------------------------------------------------------------------------------------|-------|---|----|----|----|-------|-------|-------|-------|-------|-------|----|----|------|-------|------|
| P48454 | Serine/threonine-phosphatase 2B catalytic subunit gamma isoform<br>OS=Homo sapiens<br>GN=PPP3CC<br>PE=1 SV=3 - [PP2BC_HUMAN] | 8.20  | 1 | 2  | 4  | 22 | 1.881 | 1.188 | 1.389 | 1.042 | 40.11 | 8.20  | 8  | 22 | 512  | 58.1  | 6.98 |
| Q9UL26 | Ras-related protein Rab-22A<br>OS=Homo sapiens<br>GN=RAB22A<br>PE=1 SV=2 - [RB22A_HUMAN]                                     | 16.49 | 1 | 2  | 3  | 14 | 1.227 | 1.044 | 0.886 | 1.043 | 35.96 | 16.49 | 5  | 14 | 194  | 21.8  | 8.15 |
| O94964 | Protein SOGA1<br>OS=Homo sapiens<br>GN=SOGA1<br>PE=1 SV=2 - [SOGA1_HUMAN]                                                    | 3.30  | 1 | 3  | 4  | 7  | 1.119 | 1.280 | 1.044 | 1.043 | 18.67 | 3.30  | 5  | 7  | 1423 | 159.7 | 6.46 |
| A6NE01 | Protein FAM186A<br>OS=Homo sapiens<br>GN=FAM186A<br>PE=2 SV=3 - [F186A_HUMAN]                                                | 0.34  | 1 | 1  | 1  | 2  | 0.966 | 1.072 | 0.744 | 1.043 | 4.85  | 0.34  | 1  | 2  | 2351 | 262.6 | 8.60 |
| Q96D46 | 60S ribosomal export protein NMD3<br>OS=Homo sapiens<br>GN=NMD3<br>PE=1 SV=1 - [NMD3_HUMAN]                                  | 12.72 | 1 | 5  | 5  | 7  | 0.682 | 1.006 | 1.793 | 1.043 | 24.47 | 12.72 | 5  | 7  | 503  | 57.6  | 7.14 |
| Q5T5N4 | Uncharacterized protein C6orf118<br>OS=Homo sapiens<br>GN=C6orf118<br>PE=2 SV=1 - [CF118_HUMAN]                              | 1.71  | 1 | 1  | 1  | 3  | 1.017 | 0.959 | 0.848 | 1.043 | 2.46  | 1.71  | 1  | 3  | 469  | 53.7  | 8.37 |
| Q8IVC4 | Zinc finger protein 584<br>OS=Homo sapiens<br>GN=ZNF584<br>PE=2 SV=1 - [ZNF584_HUMAN]                                        | 2.38  | 1 | 1  | 1  | 1  | 1.165 | 0.127 | 1.202 | 1.043 | 0.00  | 2.38  | 1  | 1  | 421  | 48.2  | 8.76 |
| Q05086 | Ubiquitin-protein ligase E3A<br>OS=Homo sapiens<br>GN=UBE3A<br>PE=1 SV=4 - [UBE3A_HUMAN]                                     | 14.06 | 1 | 10 | 10 | 22 | 0.927 | 1.189 | 0.865 | 1.043 | 64.10 | 14.06 | 14 | 22 | 875  | 100.6 | 5.22 |
| Q15059 | Bromodomain-containing protein 3<br>OS=Homo sapiens<br>GN=BRD3<br>PE=1 SV=1 - [BRD3_HUMAN]                                   | 8.26  | 1 | 5  | 6  | 9  | 1.414 | 2.038 | 1.236 | 1.043 | 14.78 | 8.26  | 8  | 9  | 726  | 79.5  | 9.36 |

|        |                                                                                                             |       |   |    |    |     |       |       |       |       |        |       |    |     |     |      |      |
|--------|-------------------------------------------------------------------------------------------------------------|-------|---|----|----|-----|-------|-------|-------|-------|--------|-------|----|-----|-----|------|------|
| Q2TAA2 | Isoamyl acetate-hydrolyzing esterase 1<br>homolog<br>OS=Homo sapiens<br>GN=IAH1 PE=1<br>SV=1 - [IAH1_HUMAN] | 11.29 | 1 | 3  | 3  | 21  | 1.097 | 1.139 | 0.942 | 1.043 | 44.50  | 11.29 | 6  | 21  | 248 | 27.6 | 5.30 |
| Q99714 | 3-hydroxyacyl-CoA dehydrogenase type-2<br>OS=Homo sapiens<br>GN=HSD17B10<br>PE=1 SV=3 - [HCD2_HUMAN]        | 60.92 | 1 | 11 | 11 | 55  | 1.096 | 0.998 | 0.698 | 1.043 | 193.24 | 60.92 | 17 | 55  | 261 | 26.9 | 7.78 |
| P21854 | B-cell differentiation antigen CD72<br>OS=Homo sapiens<br>GN=CD72<br>PE=1 SV=1 - [CD72_HUMAN]               | 3.90  | 1 | 1  | 1  | 2   | 1.545 | 0.803 | 1.110 | 1.043 | 5.93   | 3.90  | 1  | 2   | 359 | 40.2 | 8.28 |
| P55039 | Developmentally-regulated GTP-binding protein 2<br>OS=Homo sapiens<br>GN=DRG2<br>PE=1 SV=1 - [DRG2_HUMAN]   | 35.99 | 1 | 11 | 11 | 24  | 1.090 | 1.147 | 1.039 | 1.043 | 55.25  | 35.99 | 17 | 24  | 364 | 40.7 | 8.88 |
| Q8NBR6 | Protein FAM63B<br>OS=Homo sapiens<br>GN=FAM63B<br>PE=1 SV=2 - [FA63B_HUMAN]                                 | 2.74  | 1 | 2  | 2  | 3   | 1.149 | 1.110 | 1.597 | 1.043 | 5.75   | 2.74  | 3  | 3   | 621 | 67.1 | 4.51 |
| Q96SZ5 | 2-aminoethanethiol dioxygenase<br>OS=Homo sapiens<br>GN=ADO PE=1<br>SV=2 - [AEDO_HUMAN]                     | 22.59 | 1 | 6  | 6  | 13  | 1.148 | 0.997 | 1.181 | 1.044 | 18.16  | 22.59 | 9  | 13  | 270 | 29.7 | 6.04 |
| Q9C035 | Tripartite motif-containing protein 5<br>OS=Homo sapiens<br>GN=TRIM5<br>PE=1 SV=1 - [TRIM5_HUMAN]           | 21.30 | 1 | 8  | 8  | 16  | 1.239 | 0.977 | 1.116 | 1.044 | 38.89  | 21.30 | 11 | 16  | 493 | 56.3 | 6.05 |
| Q01105 | Protein SET<br>OS=Homo sapiens<br>GN=SET PE=1<br>SV=3 - [SET_HUMAN]                                         | 45.17 | 2 | 11 | 11 | 191 | 1.043 | 1.111 | 0.991 | 1.044 | 546.81 | 45.17 | 15 | 191 | 290 | 33.5 | 4.32 |

|        |                                                                                                                                                        |       |   |    |    |    |       |       |       |       |       |       |    |    |      |       |      |
|--------|--------------------------------------------------------------------------------------------------------------------------------------------------------|-------|---|----|----|----|-------|-------|-------|-------|-------|-------|----|----|------|-------|------|
| P50151 | Guanine<br>nucleotide-<br>binding protein<br>G(I)/G(S)/G(O)<br>subunit gamma-<br>10 OS=Homo<br>sapiens<br>GN=GNG10<br>PE=1 SV=1 -<br>[GBG10_HUMAN<br>] | 30.88 | 1 | 1  | 2  | 3  | 1.127 | 0.366 | 0.371 | 1.044 | 10.11 | 30.88 | 2  | 3  | 68   | 7.2   | 7.85 |
| Q9UPM6 | LIM/homeobox<br>protein Lhx6<br>OS=Homo<br>sapiens<br>GN=LHX6 PE=2<br>SV=2 -<br>[LHX6_HUMAN]                                                           | 2.48  | 1 | 1  | 1  | 1  | 0.943 | 1.207 | 1.704 | 1.044 | 3.16  | 2.48  | 1  | 1  | 363  | 40.0  | 8.40 |
| Q5VW32 | BRO1 domain-<br>containing<br>protein BROX<br>OS=Homo<br>sapiens<br>GN=BROX<br>PE=1 SV=1 -<br>[BROX_HUMAN]                                             | 26.76 | 1 | 9  | 9  | 19 | 1.287 | 1.295 | 1.056 | 1.044 | 31.59 | 26.76 | 11 | 19 | 411  | 46.4  | 7.65 |
| Q10713 | Mitochondrial-<br>processing<br>peptidase<br>subunit alpha<br>OS=Homo<br>sapiens<br>GN=PMPCA<br>PE=1 SV=2 -<br>[MPPA_HUMAN]                            | 29.33 | 1 | 12 | 12 | 39 | 0.989 | 1.406 | 1.216 | 1.044 | 94.28 | 29.33 | 22 | 39 | 525  | 58.2  | 6.92 |
| Q9ULI0 | ATPase family<br>AAA domain-<br>containing<br>protein 2B<br>OS=Homo<br>sapiens<br>GN=ATAD2B<br>PE=1 SV=3 -<br>[ATD2B_HUMAN<br>]                        | 1.51  | 1 | 2  | 2  | 2  | 1.142 | 0.958 | 1.019 | 1.044 | 4.59  | 1.51  | 2  | 2  | 1458 | 164.8 | 6.80 |
| O60828 | Polyglutamine-<br>binding protein<br>1 OS=Homo<br>sapiens<br>GN=PQBP1<br>PE=1 SV=1 -<br>[PQBP1_HUMA<br>N]                                              | 17.36 | 1 | 4  | 4  | 8  | 0.797 | 0.893 | 0.606 | 1.044 | 19.50 | 17.36 | 6  | 8  | 265  | 30.5  | 6.33 |
| Q5T5Y3 | Calmodulin-<br>regulated<br>spectrin-<br>associated<br>protein 1<br>OS=Homo<br>sapiens<br>GN=CAMSAP1<br>PE=1 SV=2 -<br>[CAMP1_HUMA<br>N]               | 4.93  | 1 | 5  | 7  | 15 | 1.054 | 1.124 | 1.084 | 1.045 | 35.17 | 4.93  | 12 | 15 | 1602 | 177.9 | 6.73 |
| Q9H0V9 | VIP36-like<br>protein<br>OS=Homo<br>sapiens<br>GN=LMAN2L<br>PE=1 SV=1 -<br>[LMA2L_HUMAN<br>]                                                           | 24.71 | 1 | 7  | 7  | 28 | 1.010 | 1.066 | 0.951 | 1.045 | 79.13 | 24.71 | 10 | 28 | 348  | 39.7  | 8.38 |

|        |                                                                                                                                            |       |   |    |    |     |       |       |       |       |        |       |    |     |      |       |      |
|--------|--------------------------------------------------------------------------------------------------------------------------------------------|-------|---|----|----|-----|-------|-------|-------|-------|--------|-------|----|-----|------|-------|------|
| Q96T23 | Remodeling and spacing factor 1<br>OS=Homo sapiens<br>GN=RSF1<br>PE=1 SV=2 - [RSF1_HUMAN]<br>E3 ubiquitin-protein ligase<br>RNF114         | 5.76  | 1 | 7  | 7  | 18  | 0.929 | 1.189 | 1.131 | 1.045 | 44.10  | 5.76  | 11 | 18  | 1441 | 163.7 | 5.01 |
| Q9Y508 | OS=Homo sapiens<br>GN=RNF114<br>PE=1 SV=1 - [RNF114_HUMAN]<br>Spliceosome RNA helicase<br>DDX39B                                           | 23.68 | 1 | 5  | 5  | 13  | 1.211 | 0.850 | 1.239 | 1.045 | 28.97  | 23.68 | 8  | 13  | 228  | 25.7  | 7.25 |
| Q13838 | OS=Homo sapiens<br>GN=DDX39B<br>PE=1 SV=1 - [DDX39B_HUMAN]<br>Trans-2-enoyl-CoA reductase, mitochondrial                                   | 41.36 | 1 | 8  | 19 | 131 | 1.135 | 1.105 | 1.305 | 1.045 | 326.72 | 41.36 | 26 | 131 | 428  | 49.0  | 5.67 |
| Q9BV79 | OS=Homo sapiens<br>GN=MECR<br>PE=1 SV=2 - [MECR_HUMAN]                                                                                     | 14.21 | 1 | 5  | 5  | 21  | 0.980 | 1.420 | 1.116 | 1.045 | 37.61  | 14.21 | 9  | 21  | 373  | 40.4  | 8.76 |
| Q9Y285 | Phenylalanine--tRNA ligase alpha subunit<br>OS=Homo sapiens<br>GN=FARSA<br>PE=1 SV=3 - [SYFA_HUMAN]                                        | 31.69 | 1 | 15 | 15 | 81  | 0.801 | 0.929 | 1.010 | 1.045 | 225.73 | 31.69 | 24 | 81  | 508  | 57.5  | 7.80 |
| Q8N5Z0 | Kynurenine/alpha-aminoadipate aminotransferase, mitochondrial<br>OS=Homo sapiens<br>GN=AADAT<br>PE=1 SV=2 - Protein disulfide-isomerase A6 | 1.88  | 1 | 1  | 1  | 1   | 0.452 | 0.767 | 0.439 | 1.045 | 2.85   | 1.88  | 1  | 1   | 425  | 47.3  | 6.96 |
| Q15084 | OS=Homo sapiens<br>GN=PDIA6<br>PE=1 SV=1 - [PDIA6_HUMAN]<br>Caspase-7                                                                      | 50.00 | 1 | 21 | 22 | 283 | 0.764 | 0.965 | 0.850 | 1.045 | 731.99 | 50.00 | 38 | 283 | 440  | 48.1  | 5.08 |
| P55210 | OS=Homo sapiens<br>GN=CASP7<br>PE=1 SV=1 - [CASP7_HUMAN]                                                                                   | 24.75 | 1 | 7  | 7  | 27  | 1.562 | 0.730 | 0.751 | 1.045 | 63.73  | 24.75 | 12 | 27  | 303  | 34.3  | 6.07 |
| Q8NFZ8 | Cell adhesion molecule 4<br>OS=Homo sapiens<br>GN=CADM4<br>PE=1 SV=1 - [CADM4_HUMAN]                                                       | 2.32  | 1 | 1  | 1  | 1   | 1.495 | 1.134 | 1.451 | 1.045 | 2.35   | 2.32  | 1  | 1   | 388  | 42.8  | 6.30 |

|        |                                                                                                                                                |       |   |     |     |     |       |       |       |       |         |       |     |     |      |       |       |
|--------|------------------------------------------------------------------------------------------------------------------------------------------------|-------|---|-----|-----|-----|-------|-------|-------|-------|---------|-------|-----|-----|------|-------|-------|
| Q16891 | MICOS complex<br>subunit MIC60<br>OS=Homo<br>sapiens<br>GN=IMMT<br>PE=1 SV=1 -<br>[MIC60_HUMAN<br>]                                            | 48.94 | 1 | 40  | 43  | 202 | 0.929 | 1.011 | 0.826 | 1.045 | 497.05  | 48.94 | 71  | 202 | 758  | 83.6  | 6.48  |
| Q92947 | Glutaryl-CoA<br>dehydrogenase<br>, mitochondrial<br>OS=Homo<br>sapiens<br>GN=GCDH<br>PE=1 SV=1 -<br>[GCDH_HUMAN]                               | 21.69 | 2 | 8   | 9   | 24  | 0.960 | 1.206 | 1.145 | 1.045 | 62.91   | 21.69 | 13  | 24  | 438  | 48.1  | 8.06  |
| Q9UKK9 | ADP-sugar<br>pyrophosphata<br>se OS=Homo<br>sapiens<br>GN=NUDT5<br>PE=1 SV=1 -<br>[NUDT5_HUMAN<br>]                                            | 55.71 | 1 | 10  | 10  | 50  | 0.934 | 0.880 | 0.843 | 1.046 | 103.74  | 55.71 | 16  | 50  | 219  | 24.3  | 4.94  |
| P46060 | Ran GTPase-<br>activating<br>protein 1<br>OS=Homo<br>sapiens<br>GN=RANGAP1<br>PE=1 SV=1 -<br>[RAGP1_HUMAN<br>]                                 | 38.84 | 1 | 25  | 25  | 125 | 1.069 | 0.934 | 1.008 | 1.046 | 295.48  | 38.84 | 43  | 125 | 587  | 63.5  | 4.68  |
| P05161 | Ubiquitin-like<br>protein ISG15<br>OS=Homo<br>sapiens<br>GN=ISG15<br>PE=1 SV=5 -<br>[ISG15_HUMAN<br>]                                          | 35.15 | 1 | 5   | 5   | 15  | 5.412 | 0.669 | 1.285 | 1.046 | 37.18   | 35.15 | 8   | 15  | 165  | 17.9  | 7.44  |
| Q15393 | Splicing factor<br>3B subunit 3<br>OS=Homo<br>sapiens<br>GN=SF3B3<br>PE=1 SV=4 -<br>[SF3B3_HUMAN<br>]                                          | 23.58 | 1 | 28  | 29  | 107 | 0.962 | 1.119 | 0.857 | 1.046 | 244.91  | 23.58 | 49  | 107 | 1217 | 135.5 | 5.26  |
| Q07020 | 60S ribosomal<br>protein L18<br>OS=Homo<br>sapiens<br>GN=RPL18<br>PE=1 SV=2 -<br>[RL18_HUMAN]                                                  | 41.49 | 1 | 8   | 8   | 107 | 0.744 | 0.849 | 0.935 | 1.046 | 221.45  | 41.49 | 12  | 107 | 188  | 21.6  | 11.72 |
| Q99442 | Translocation<br>protein SEC62<br>OS=Homo<br>sapiens<br>GN=SEC62<br>PE=1 SV=1 -<br>[SEC62_HUMAN<br>]                                           | 17.79 | 1 | 9   | 9   | 26  | 0.899 | 1.243 | 0.857 | 1.046 | 50.83   | 17.79 | 14  | 26  | 399  | 45.8  | 7.12  |
| Q9UPN3 | Microtubule-<br>actin cross-<br>linking factor<br>1, isoforms<br>1/2/3/5<br>OS=Homo<br>sapiens<br>GN=MACF1<br>PE=1 SV=4 -<br>[MACF1_HUMA<br>N] | 37.30 | 2 | 255 | 262 | 981 | 1.134 | 0.871 | 1.125 | 1.046 | 2388.65 | 37.30 | 406 | 981 | 7388 | 837.8 | 5.39  |

|        |                                                                                                                                                                                                                                                                                                                                                                     |       |    |    |    |      |       |       |       |       |        |       |     |      |     |      |       |
|--------|---------------------------------------------------------------------------------------------------------------------------------------------------------------------------------------------------------------------------------------------------------------------------------------------------------------------------------------------------------------------|-------|----|----|----|------|-------|-------|-------|-------|--------|-------|-----|------|-----|------|-------|
| Q8WW01 | tRNA-splicing<br>endonuclease<br>subunit Sen15<br>OS=Homo<br>sapiens<br>GN= TSEN15<br>PE=1 SV=1 -<br>[SEN15_HUMAN<br>]<br>Casein kinase<br>II subunit<br>alpha<br>OS=Homo<br>sapiens<br>GN= CSNK2A1<br>PE=1 SV=1 -<br>[CSK21_HUMAN<br>tRNA<br>(cytosine(34)-<br>C(5))-<br>methyltransfer<br>ase OS=Homo<br>sapiens<br>GN= NSUN2<br>PE=1 SV=2 -<br>[NSUN2_HUMAN<br>] | 23.98 | 1  | 2  | 2  | 2    | 0.783 | 1.582 | 1.200 | 1.046 | 9.78   | 23.98 | 2   | 2    | 171 | 18.6 | 4.58  |
| P68400 | OS=Homo<br>sapiens<br>GN= CSNK2A1<br>PE=1 SV=1 -<br>[CSK21_HUMAN<br>tRNA<br>(cytosine(34)-<br>C(5))-<br>methyltransfer<br>ase OS=Homo<br>sapiens<br>GN= NSUN2<br>PE=1 SV=2 -<br>[NSUN2_HUMAN<br>]                                                                                                                                                                   | 52.69 | 2  | 13 | 15 | 37   | 0.993 | 0.981 | 1.098 | 1.046 | 103.70 | 52.69 | 22  | 37   | 391 | 45.1 | 7.74  |
| Q08J23 | OS=Homo<br>sapiens<br>GN= NSUN2<br>PE=1 SV=2 -<br>[NSUN2_HUMAN<br>]                                                                                                                                                                                                                                                                                                 | 22.69 | 1  | 17 | 17 | 59   | 0.925 | 0.927 | 0.996 | 1.046 | 149.78 | 22.69 | 26  | 59   | 767 | 86.4 | 6.77  |
| P08670 | Vimentin<br>OS=Homo<br>sapiens<br>GN= VIM PE=1<br>SV=4 -<br>[VIME_HUMAN]                                                                                                                                                                                                                                                                                            | 89.06 | 3  | 52 | 62 | 5709 | 1.151 | 0.833 | 1.138 | 1.046 | #####  | 89.06 | 117 | 5709 | 466 | 53.6 | 5.12  |
| O95757 | Heat shock 70<br>kDa protein 4L<br>OS=Homo<br>sapiens<br>GN= HSPA4L<br>PE=1 SV=3 -<br>[HS74L_HUMAN<br>]                                                                                                                                                                                                                                                             | 21.10 | 1  | 14 | 19 | 51   | 1.241 | 1.437 | 1.497 | 1.046 | 127.79 | 21.10 | 27  | 51   | 839 | 94.5 | 5.88  |
| P09341 | Growth-<br>regulated<br>alpha protein<br>OS=Homo<br>sapiens<br>GN= CXCL1<br>PE=1 SV=1 -<br>[GROA_HUMAN]                                                                                                                                                                                                                                                             | 10.28 | 1  | 1  | 1  | 6    | 3.383 | 0.539 | 0.357 | 1.046 | 10.23  | 10.28 | 2   | 6    | 107 | 11.3 | 10.43 |
| Q96LX8 | Zinc finger<br>protein 597<br>OS=Homo<br>sapiens<br>GN= ZNF597<br>PE=2 SV=1 -<br>[ZNF597_HUMAN<br>]                                                                                                                                                                                                                                                                 | 4.48  | 94 | 1  | 2  | 3    | 2.298 | 1.477 | 1.512 | 1.046 | 2.07   | 4.48  | 2   | 3    | 424 | 48.0 | 6.76  |
| Q96GA7 | Serine<br>dehydratase-<br>like OS=Homo<br>sapiens<br>GN= SDSL PE=1<br>SV=1 -<br>[SDSL_HUMAN]                                                                                                                                                                                                                                                                        | 24.62 | 1  | 5  | 6  | 9    | 0.860 | 0.650 | 0.795 | 1.047 | 24.19  | 24.62 | 8   | 9    | 329 | 34.7 | 6.89  |
| O60551 | Glycopeptide N-<br>tetradecanoyl<br>transferase 2<br>OS=Homo<br>sapiens<br>GN= NMT2<br>PE=1 SV=1 -<br>[NMT2_HUMAN]                                                                                                                                                                                                                                                  | 27.11 | 1  | 9  | 10 | 22   | 0.815 | 1.126 | 1.058 | 1.047 | 71.55  | 27.11 | 13  | 22   | 498 | 56.9 | 7.58  |



|        |                                                                                                                                            |       |   |    |    |    |       |       |       |       |        |       |    |    |     |      |      |
|--------|--------------------------------------------------------------------------------------------------------------------------------------------|-------|---|----|----|----|-------|-------|-------|-------|--------|-------|----|----|-----|------|------|
| A2RU30 | Protein<br>TESPA1<br>OS=Homo<br>sapiens<br>GN=TESPA1<br>PE=1 SV=2 -<br>[TESP1_HUMAN<br>]                                                   | 3.07  | 1 | 1  | 1  | 1  | 1.590 | 1.367 | 1.939 | 1.047 | 0.00   | 3.07  | 1  | 1  | 521 | 59.2 | 5.71 |
| P51858 | Hepatoma-<br>derived growth<br>factor<br>OS=Homo<br>sapiens<br>GN=HDGF<br>PE=1 SV=1 -<br>[HDGF_HUMAN]                                      | 43.75 | 1 | 11 | 12 | 69 | 1.185 | 1.161 | 1.015 | 1.047 | 151.54 | 43.75 | 19 | 69 | 240 | 26.8 | 4.73 |
| P49247 | Ribose-5-<br>phosphate<br>isomerase<br>OS=Homo<br>sapiens<br>GN=RPIA PE=1<br>SV=3 -<br>[RPIA_HUMAN]                                        | 9.97  | 1 | 3  | 3  | 6  | 1.213 | 1.298 | 1.073 | 1.047 | 15.45  | 9.97  | 3  | 6  | 311 | 33.2 | 8.54 |
| P49716 | CCAAT/enhanc<br>er-binding<br>protein delta<br>OS=Homo<br>sapiens<br>GN=CEBPD<br>PE=1 SV=2 -<br>[CEBPD_HUMAN<br>]                          | 8.18  | 1 | 2  | 2  | 4  | 1.154 | 2.909 | 1.297 | 1.047 | 11.33  | 8.18  | 2  | 4  | 269 | 28.4 | 8.28 |
| Q9H9C1 | Spermatogene<br>sis-defective<br>protein 39<br>homolog<br>OS=Homo<br>sapiens<br>GN=VIPAS39<br>PE=1 SV=1 -<br>[SPE39_HUMAN<br>]             | 21.91 | 1 | 10 | 10 | 36 | 1.048 | 1.098 | 1.292 | 1.047 | 96.44  | 21.91 | 16 | 36 | 493 | 57.0 | 7.40 |
| O00559 | Receptor-<br>binding cancer<br>antigen<br>expressed on<br>SiSo cells<br>OS=Homo<br>sapiens<br>GN=EBAG9<br>PE=1 SV=1 -<br>[RCAS1_HUMAN<br>] | 26.76 | 1 | 3  | 3  | 3  | 0.419 | 0.780 | 0.870 | 1.047 | 10.46  | 26.76 | 3  | 3  | 213 | 24.4 | 6.29 |
| O60234 | Glia maturation<br>factor gamma<br>OS=Homo<br>sapiens<br>GN=GMFG<br>PE=1 SV=1 -<br>[GMFG_HUMAN]                                            | 14.08 | 1 | 1  | 3  | 16 | 1.095 | 1.062 | 1.019 | 1.047 | 27.23  | 14.08 | 5  | 16 | 142 | 16.8 | 5.26 |
| Q6UUV7 | CREB-<br>regulated<br>transcription<br>coactivator 3<br>OS=Homo<br>sapiens<br>GN=CRTC3<br>PE=1 SV=2 -<br>[CRTC3_HUMAN]                     | 1.62  | 1 | 1  | 1  | 2  | 0.871 | 1.290 | 1.011 | 1.047 | 7.63   | 1.62  | 2  | 2  | 619 | 66.9 | 6.84 |
| Q9H0W8 | Protein SMG9<br>OS=Homo<br>sapiens<br>GN=SMG9<br>PE=1 SV=1 -<br>[SMG9_HUMAN]                                                               | 12.88 | 1 | 5  | 5  | 21 | 1.030 | 1.051 | 1.335 | 1.047 | 39.98  | 12.88 | 7  | 21 | 520 | 57.6 | 7.01 |

|        |                                                                                                                            |       |   |    |    |    |       |       |       |       |       |       |    |    |     |      |      |
|--------|----------------------------------------------------------------------------------------------------------------------------|-------|---|----|----|----|-------|-------|-------|-------|-------|-------|----|----|-----|------|------|
| P82663 | 28S ribosomal protein S25, mitochondrial<br>OS=Homo sapiens<br>GN=MRPS25<br>PE=1 SV=1 - [RT25_HUMAN]                       | 30.06 | 1 | 5  | 5  | 9  | 0.864 | 0.961 | 0.847 | 1.047 | 25.38 | 30.06 | 7  | 9  | 173 | 20.1 | 8.82 |
| Q8NBV8 | Synaptotagmin-8 OS=Homo sapiens<br>GN=SYT8<br>PE=2 SV=4 - [SYT8_HUMAN]                                                     | 2.00  | 1 | 1  | 1  | 2  | 0.674 | 0.421 | 0.403 | 1.047 | 5.52  | 2.00  | 1  | 2  | 401 | 44.1 | 9.54 |
| B5MCN3 | Putative SEC14-like protein 6 OS=Homo sapiens<br>GN=SEC14L6<br>PE=5 SV=1 - [S14L6_HUMAN]                                   | 2.27  | 1 | 1  | 1  | 1  | 1.179 | 1.138 | 0.974 | 1.047 | 2.51  | 2.27  | 1  | 1  | 397 | 45.3 | 7.06 |
| P57105 | Synaptojanin-2-binding protein OS=Homo sapiens<br>GN=SYNJ2BP<br>PE=1 SV=2 - [SYJ2B_HUMAN]                                  | 42.76 | 1 | 5  | 5  | 19 | 1.033 | 0.992 | 0.908 | 1.048 | 46.29 | 42.76 | 8  | 19 | 145 | 15.9 | 6.30 |
| O14545 | TRAF-type zinc finger domain-containing protein 1 OS=Homo sapiens<br>GN=TRAFD1<br>PE=1 SV=1 - [TRAD1_HUMAN]                | 6.01  | 1 | 3  | 3  | 11 | 0.814 | 1.390 | 1.005 | 1.048 | 32.76 | 6.01  | 5  | 11 | 582 | 64.8 | 5.29 |
| Q9BQQ3 | Golgi reassembly-stacking protein 1 OS=Homo sapiens<br>GN=GORASP1<br>PE=1 SV=3 - [GORS1_HUMA]                              | 3.41  | 1 | 1  | 2  | 10 | 0.831 | 0.834 | 0.786 | 1.048 | 14.68 | 3.41  | 4  | 10 | 440 | 46.5 | 4.50 |
| Q8TC07 | TBC1 domain family member 15 OS=Homo sapiens<br>GN=TBC1D15<br>PE=1 SV=2 - [TBC15_HUMAN]                                    | 13.31 | 1 | 8  | 8  | 27 | 0.937 | 1.027 | 1.102 | 1.048 | 63.16 | 13.31 | 13 | 27 | 691 | 79.4 | 5.67 |
| O76031 | ATP-dependent Clp protease ATP-binding subunit dpX-like, mitochondrial OS=Homo sapiens<br>GN=CLPX PE=1 SV=2 - [CLPX_HUMAN] | 22.75 | 1 | 12 | 12 | 36 | 0.864 | 0.985 | 0.976 | 1.048 | 95.92 | 22.75 | 18 | 36 | 633 | 69.2 | 7.58 |
| Q9BX51 | Gamma-glutamyltransferase light chain 1 OS=Homo sapiens<br>GN=GGTLC1<br>PE=2 SV=2 - [GGTL1_HUMAN]                          | 5.33  | 1 | 1  | 1  | 1  | 1.199 | 0.490 | 0.784 | 1.048 | 3.05  | 5.33  | 1  | 1  | 225 | 24.3 | 5.16 |

|        |                                                                                                                                                                 |       |   |    |    |    |       |       |       |       |        |       |    |    |      |       |      |
|--------|-----------------------------------------------------------------------------------------------------------------------------------------------------------------|-------|---|----|----|----|-------|-------|-------|-------|--------|-------|----|----|------|-------|------|
| Q9P0I2 | ER membrane protein complex subunit 3<br>OS=Homo sapiens<br>GN=EMC3<br>PE=1 SV=3 - [EMC3_HUMAN]<br>Serine/threonine-protein phosphatase 4 regulatory subunit 3A | 31.03 | 1 | 6  | 6  | 14 | 1.276 | 0.910 | 0.808 | 1.048 | 43.34  | 31.03 | 9  | 14 | 261  | 29.9  | 6.81 |
| Q6IN85 | OS=Homo sapiens<br>GN=SMEK1<br>PE=1 SV=1 - [P4R3A_HUMAN]<br>] Germinal-center associated nuclear protein                                                        | 7.32  | 2 | 6  | 6  | 15 | 0.948 | 1.218 | 0.925 | 1.048 | 34.58  | 7.32  | 9  | 15 | 833  | 95.3  | 4.94 |
| O60318 | OS=Homo sapiens<br>GN=MCM3AP<br>PE=1 SV=2 - [GANP_HUMAN]<br>U2 snRNP-associated SURP motif-containing protein                                                   | 5.15  | 1 | 6  | 7  | 11 | 1.081 | 0.983 | 1.240 | 1.048 | 23.94  | 5.15  | 9  | 11 | 1980 | 218.3 | 6.39 |
| O15042 | OS=Homo sapiens<br>GN=U2SURP<br>PE=1 SV=2 - [SR140_HUMAN]<br>] [Pyruvate dehydrogenase (acetyl-transferring)] kinase isozyme 2,                                 | 11.56 | 1 | 11 | 11 | 34 | 0.945 | 1.144 | 0.842 | 1.048 | 73.84  | 11.56 | 15 | 34 | 1029 | 118.2 | 8.47 |
| Q15119 | mitochondrial OS=Homo sapiens<br>GN=PDK2<br>PE=1 SV=2 - [PDK2_HUMAN]<br>Membrane-associated guanylate kinase, WW and PDZ domain-containing protein 1            | 4.42  | 1 | 2  | 2  | 3  | 0.955 | 1.519 | 1.136 | 1.048 | 4.99   | 4.42  | 3  | 3  | 407  | 46.1  | 6.61 |
| Q96QZ7 | OS=Homo sapiens<br>GN=MAGI1<br>PE=1 SV=3 - [MAGI1_HUMAN]<br>Probable ATP-dependent RNA helicase                                                                 | 4.09  | 1 | 4  | 4  | 6  | 1.059 | 0.937 | 1.166 | 1.049 | 13.12  | 4.09  | 6  | 6  | 1491 | 164.5 | 7.58 |
| P26196 | OS=Homo sapiens<br>GN=DDX6<br>PE=1 SV=2 - [DDX6_HUMAN]                                                                                                          | 45.34 | 3 | 18 | 19 | 83 | 0.881 | 1.156 | 1.102 | 1.049 | 178.04 | 45.34 | 30 | 83 | 483  | 54.4  | 8.66 |

|        |                                                                                                                         |       |   |    |    |     |       |       |       |       |        |       |    |     |     |      |      |
|--------|-------------------------------------------------------------------------------------------------------------------------|-------|---|----|----|-----|-------|-------|-------|-------|--------|-------|----|-----|-----|------|------|
| Q8NBF2 | NHL repeat-containing protein 2<br>OS=Homo sapiens<br>GN=NHLRC2<br>PE=1 SV=1 - [NHLRC2_HUMAN]                           | 8.68  | 1 | 5  | 5  | 24  | 1.276 | 1.228 | 1.078 | 1.049 | 64.65  | 8.68  | 8  | 24  | 726 | 79.4 | 5.55 |
| Q6ZQX7 | Uncharacterized protein C17orf97<br>OS=Homo sapiens<br>GN=C17orf97<br>PE=2 SV=2 - [CQ097_HUMAN]                         | 22.08 | 1 | 1  | 1  | 4   | 1.024 | 0.985 | 0.891 | 1.049 | 11.07  | 22.08 | 2  | 4   | 453 | 49.6 | 7.97 |
| P61956 | Small ubiquitin-related modifier 2<br>OS=Homo sapiens<br>GN=SUMO2<br>PE=1 SV=3 - [SUMO2_HUMAN]                          | 27.37 | 1 | 2  | 3  | 65  | 1.403 | 1.230 | 0.903 | 1.049 | 117.57 | 27.37 | 6  | 65  | 95  | 10.9 | 5.50 |
| Q9NW61 | Pleckstrin homology domain-containing family J member 1<br>OS=Homo sapiens<br>GN=PLEKH1<br>PE=2 SV=1 - [PKH1_HUMAN]     | 16.78 | 1 | 2  | 2  | 2   | 0.820 | 1.365 | 1.674 | 1.049 | 2.37   | 16.78 | 2  | 2   | 149 | 17.5 | 7.84 |
| P01034 | Cystatin-C<br>OS=Homo sapiens<br>GN=CST3<br>PE=1 SV=1 - [CYTC_HUMAN]                                                    | 19.18 | 1 | 3  | 3  | 6   | 1.253 | 0.865 | 1.516 | 1.049 | 24.53  | 19.18 | 3  | 6   | 146 | 15.8 | 8.75 |
| P43897 | Elongation factor Ts, mitochondrial<br>OS=Homo sapiens<br>GN=TSFM<br>PE=1 SV=2 - [EFTS_HUMAN]                           | 29.54 | 1 | 7  | 7  | 19  | 0.888 | 1.085 | 0.956 | 1.049 | 44.61  | 29.54 | 10 | 19  | 325 | 35.4 | 8.38 |
| Q00325 | Phosphate carrier protein, mitochondrial<br>OS=Homo sapiens<br>GN=SLC25A3<br>PE=1 SV=2 - [MPCP_HUMAN]                   | 25.69 | 1 | 14 | 14 | 153 | 1.076 | 1.002 | 0.881 | 1.049 | 304.71 | 25.69 | 24 | 153 | 362 | 40.1 | 9.38 |
| P12694 | 2-oxoisovalerate dehydrogenase subunit alpha, mitochondrial<br>OS=Homo sapiens<br>GN=BCKDHA<br>PE=1 SV=2 - [ODBA_HUMAN] | 13.26 | 1 | 6  | 6  | 13  | 1.036 | 1.627 | 1.098 | 1.049 | 35.60  | 13.26 | 9  | 13  | 445 | 50.4 | 8.27 |

|        |                                                                                                                                        |       |   |    |    |    |       |       |       |       |        |       |    |    |      |       |       |
|--------|----------------------------------------------------------------------------------------------------------------------------------------|-------|---|----|----|----|-------|-------|-------|-------|--------|-------|----|----|------|-------|-------|
| A3KMH1 | von Willebrand factor A domain-containing protein 8<br>OS=Homo sapiens<br>GN=VWA8<br>PE=1 SV=2 - [VWA8_HUMAN]                          | 13.44 | 1 | 22 | 22 | 42 | 0.974 | 1.258 | 1.025 | 1.049 | 95.55  | 13.44 | 31 | 42 | 1905 | 214.7 | 7.40  |
| Q92934 | Bd2-associated agonist of cell death<br>OS=Homo sapiens<br>GN=BAD PE=1 SV=3 - [BAD_HUMAN]                                              | 9.52  | 1 | 1  | 1  | 6  | 1.142 | 1.517 | 1.146 | 1.049 | 15.33  | 9.52  | 2  | 6  | 168  | 18.4  | 7.15  |
| Q9HC36 | rRNA methyltransferase 3, mitochondrial<br>OS=Homo sapiens<br>GN=RNMTL1<br>PE=1 SV=2 - [MRM3_HUMAN]                                    | 4.52  | 1 | 1  | 2  | 3  | 0.854 | 1.352 | 1.184 | 1.049 | 5.60   | 4.52  | 3  | 3  | 420  | 47.0  | 8.73  |
| Q9UNX3 | 60S ribosomal protein L26-like 1<br>OS=Homo sapiens<br>GN=RPL26L1<br>PE=1 SV=1 - [RL26L_HUMAN]                                         | 48.28 | 2 | 1  | 12 | 93 | 0.823 | 0.967 | 0.672 | 1.049 | 172.12 | 48.28 | 20 | 93 | 145  | 17.2  | 10.55 |
| Q8NAV1 | Pre-mRNA-splicing factor 38A<br>OS=Homo sapiens<br>GN=PRPF38A<br>PE=1 SV=1 - [PR38A_HUMAN]                                             | 7.05  | 1 | 2  | 2  | 9  | 0.572 | 1.186 | 1.041 | 1.049 | 30.65  | 7.05  | 3  | 9  | 312  | 37.5  | 9.96  |
| P51452 | Dual specificity protein phosphatase 3<br>OS=Homo sapiens<br>GN=DUSP3<br>PE=1 SV=1 - [DUS3_HUMAN]                                      | 41.62 | 1 | 6  | 6  | 20 | 1.299 | 1.005 | 1.187 | 1.050 | 64.01  | 41.62 | 10 | 20 | 185  | 20.5  | 7.80  |
| O15294 | UDP-N-acetylglucosamine--peptide N-acetylglucosaminyltransferase 110 kDa subunit<br>OS=Homo sapiens<br>GN=OGT PE=1 SV=3 - [OGT1_HUMAN] | 17.50 | 1 | 15 | 15 | 46 | 0.767 | 1.097 | 1.041 | 1.050 | 130.01 | 17.50 | 22 | 46 | 1046 | 116.8 | 6.70  |
| Q9Y6E0 | Serine/threonine-protein kinase 24<br>OS=Homo sapiens<br>GN=STK24<br>PE=1 SV=1 - [STK24_HUMAN]                                         | 30.02 | 1 | 6  | 12 | 25 | 1.049 | 0.790 | 0.746 | 1.050 | 63.30  | 30.02 | 17 | 25 | 443  | 49.3  | 5.69  |

|        |                                                                                                                                           |       |   |    |    |    |       |       |       |       |        |       |    |    |     |       |      |
|--------|-------------------------------------------------------------------------------------------------------------------------------------------|-------|---|----|----|----|-------|-------|-------|-------|--------|-------|----|----|-----|-------|------|
| Q96JB5 | CDK5<br>regulatory<br>subunit-<br>associated<br>protein 3<br>OS=Homo<br>sapiens<br>GN=CDK5RAP3<br>PE=1 SV=2 -<br>[CK5P3_HUMAN<br>]        | 33.60 | 3 | 17 | 18 | 67 | 0.904 | 0.856 | 0.767 | 1.050 | 173.88 | 33.60 | 33 | 67 | 506 | 56.9  | 4.75 |
| P43487 | Ran-specific<br>GTPase-<br>activating<br>protein<br>OS=Homo<br>sapiens<br>GN=RANBP1<br>PE=1 SV=1 -<br>[RANG_HUMAN]                        | 33.33 | 2 | 6  | 6  | 58 | 1.005 | 1.031 | 0.943 | 1.050 | 121.45 | 33.33 | 10 | 58 | 201 | 23.3  | 5.29 |
| Q07021 | Complement<br>component 1<br>Q<br>subcomponent-<br>binding<br>protein,<br>mitochondrial<br>OS=Homo<br>sapiens<br>GN=C1QB<br>PE=1 SV=1 -   | 51.42 | 1 | 8  | 8  | 87 | 0.932 | 1.024 | 0.617 | 1.050 | 307.14 | 51.42 | 12 | 87 | 282 | 31.3  | 4.84 |
| Q99627 | COP9<br>signalosome<br>complex<br>subunit 8<br>OS=Homo<br>sapiens<br>GN=COPS8<br>PE=1 SV=1 -<br>[CSN8_HUMAN]                              | 33.49 | 1 | 5  | 5  | 29 | 0.875 | 1.089 | 1.041 | 1.050 | 85.99  | 33.49 | 8  | 29 | 209 | 23.2  | 5.38 |
| Q96ND0 | Protein<br>FAM210A<br>OS=Homo<br>sapiens<br>GN=FAM210A<br>PE=1 SV=2 -<br>[F210A_HUMAN<br>]                                                | 2.21  | 1 | 1  | 1  | 1  | 1.050 | 1.112 | 0.934 | 1.050 | 2.16   | 2.21  | 1  | 1  | 272 | 30.8  | 9.76 |
| Q5QP82 | DDB1- and<br>CUL4-<br>associated<br>factor 10<br>OS=Homo<br>sapiens<br>GN=DCAF10<br>PE=1 SV=1 -<br>[DCA10_HUMAN]                          | 8.41  | 1 | 2  | 2  | 3  | 0.899 | 0.647 | 0.700 | 1.051 | 7.91   | 8.41  | 2  | 3  | 559 | 60.5  | 7.50 |
| Q9P253 | Vacuolar<br>protein sorting-<br>associated<br>protein 18<br>homolog<br>OS=Homo<br>sapiens<br>GN=VPS18<br>PE=1 SV=2 -<br>[VPS18_HUMAN<br>] | 13.26 | 1 | 13 | 13 | 34 | 0.927 | 1.161 | 1.163 | 1.051 | 72.13  | 13.26 | 20 | 34 | 973 | 110.1 | 6.07 |
| Q9UHQ4 | B-cell receptor-<br>associated<br>protein 29<br>OS=Homo<br>sapiens<br>GN=BCAP29<br>PE=1 SV=2 -<br>[BAP29_HUMAN<br>]                       | 32.78 | 1 | 9  | 9  | 48 | 1.104 | 1.249 | 0.856 | 1.051 | 118.10 | 32.78 | 14 | 48 | 241 | 28.3  | 9.54 |

|        |                                                                                                             |       |   |    |    |    |       |       |       |       |        |       |    |    |      |       |       |
|--------|-------------------------------------------------------------------------------------------------------------|-------|---|----|----|----|-------|-------|-------|-------|--------|-------|----|----|------|-------|-------|
| O76003 | Glutaredoxin-3<br>OS=Homo sapiens<br>GN=GLRX3<br>PE=1 SV=2 - [GLRX3_HUMAN]                                  | 39.10 | 1 | 12 | 12 | 44 | 1.094 | 0.907 | 1.053 | 1.051 | 130.92 | 39.10 | 19 | 44 | 335  | 37.4  | 5.39  |
| A6NF36 | Coiled-coil domain-containing protein 182<br>OS=Homo sapiens<br>GN=CCDC182<br>PE=2 SV=1 - [CC182_HUMAN]     | 16.99 | 1 | 1  | 2  | 20 |       |       | 1.223 | 1.051 | 41.67  | 16.99 | 2  | 20 | 153  | 17.5  | 6.58  |
| P27658 | Collagen alpha-1(VIII) chain<br>OS=Homo sapiens<br>GN=COL8A1<br>PE=1 SV=2 - [CO8A1_HUMAN]                   | 4.17  | 1 | 2  | 3  | 4  | 1.546 | 0.661 | 0.627 | 1.051 | 5.07   | 4.17  | 4  | 4  | 744  | 73.3  | 9.61  |
| P16930 | Fumarylacetoacetase<br>OS=Homo sapiens<br>GN=FAH PE=1 SV=2 - [FAAH_HUMAN]                                   | 23.87 | 1 | 9  | 9  | 35 | 0.995 | 0.951 | 0.957 | 1.051 | 75.88  | 23.87 | 16 | 35 | 419  | 46.3  | 6.95  |
| Q9H857 | 5'-nucleotidase domain-containing protein 2<br>OS=Homo sapiens<br>GN=NTSDC2<br>PE=1 SV=1 - [NTSD2_HUMAN]    | 9.04  | 1 | 5  | 5  | 15 | 0.493 | 1.225 | 0.989 | 1.051 | 34.36  | 9.04  | 10 | 15 | 520  | 60.7  | 6.77  |
| Q9HA64 | Ketosamine-3-kinase<br>OS=Homo sapiens<br>GN=FN3KRP<br>PE=1 SV=2 - [KT3K_HUMAN]                             | 18.12 | 1 | 6  | 6  | 18 | 1.280 | 1.267 | 1.040 | 1.051 | 42.95  | 18.12 | 11 | 18 | 309  | 34.4  | 7.33  |
| Q9Y2E4 | Disco-interacting protein 2 homolog C<br>OS=Homo sapiens<br>GN=DIP2C<br>PE=2 SV=2 - [DIP2C_HUMAN]           | 3.47  | 1 | 3  | 5  | 11 | 1.177 | 1.107 | 1.303 | 1.051 | 24.19  | 3.47  | 5  | 11 | 1556 | 170.7 | 7.39  |
| Q9UBB5 | Methyl-CpG-binding domain protein 2<br>OS=Homo sapiens<br>GN=MBD2<br>PE=1 SV=1 - [MBD2_HUMAN]               | 15.57 | 1 | 4  | 5  | 9  | 1.221 | 0.737 | 0.750 | 1.051 | 16.90  | 15.57 | 8  | 9  | 411  | 43.2  | 10.04 |
| Q96C90 | Protein phosphatase 1 regulatory subunit 14B<br>OS=Homo sapiens<br>GN=PPP1R14B<br>PE=1 SV=3 - [PP14B_HUMAN] | 30.61 | 1 | 3  | 3  | 8  | 0.774 | 1.102 | 1.528 | 1.052 | 22.79  | 30.61 | 5  | 8  | 147  | 15.9  | 4.86  |

|        |                                                                                                  |       |   |    |    |    |       |       |       |       |        |       |    |    |      |       |       |
|--------|--------------------------------------------------------------------------------------------------|-------|---|----|----|----|-------|-------|-------|-------|--------|-------|----|----|------|-------|-------|
| Q13033 | Striatin-3<br>OS=Homo sapiens<br>GN=STRN3<br>PE=1 SV=3 - [STRN3_HUMAN]                           | 20.08 | 1 | 9  | 13 | 37 | 0.999 | 1.073 | 1.207 | 1.052 | 71.89  | 20.08 | 20 | 37 | 797  | 87.2  | 5.36  |
| P00813 | Adenosine deaminase<br>OS=Homo sapiens<br>GN=ADA PE=1 SV=3 - [ADA_HUMAN]                         | 14.60 | 1 | 5  | 6  | 12 | 0.720 | 0.627 | 0.972 | 1.052 | 24.16  | 14.60 | 8  | 12 | 363  | 40.7  | 5.95  |
| P46776 | 60S ribosomal protein L27a<br>OS=Homo sapiens<br>GN=RPL27A<br>PE=1 SV=2 - [RL27A_HUMAN]          | 26.35 | 1 | 6  | 6  | 49 | 0.823 | 0.804 | 0.820 | 1.052 | 82.94  | 26.35 | 10 | 49 | 148  | 16.6  | 11.00 |
| Q15642 | Cdc42-interacting protein 4<br>OS=Homo sapiens<br>GN=TRIP10<br>PE=1 SV=3 - [CIP4_HUMAN]          | 42.93 | 1 | 24 | 25 | 91 | 1.076 | 1.080 | 1.226 | 1.052 | 212.24 | 42.93 | 41 | 91 | 601  | 68.3  | 5.73  |
| Q8NBJ7 | Sulfatase-modifying factor 2<br>OS=Homo sapiens<br>GN=SUMF2<br>PE=1 SV=2 - [SUMF2_HUMAN]         | 39.53 | 1 | 12 | 12 | 55 | 1.220 | 0.955 | 0.913 | 1.052 | 138.85 | 39.53 | 20 | 55 | 301  | 33.8  | 8.00  |
| Q9BPX3 | Condensin complex subunit 3<br>OS=Homo sapiens<br>GN=NCAPG<br>PE=1 SV=1 - [CND3_HUMAN]           | 3.55  | 1 | 3  | 3  | 5  | 0.821 | 1.139 | 0.758 | 1.052 | 11.35  | 3.55  | 3  | 5  | 1015 | 114.3 | 5.59  |
| P62993 | Growth factor receptor-bound protein 2<br>OS=Homo sapiens<br>GN=GRB2<br>PE=1 SV=1 - [GRB2_HUMAN] | 42.86 | 1 | 10 | 10 | 43 | 1.138 | 1.098 | 1.246 | 1.052 | 114.20 | 42.86 | 18 | 43 | 217  | 25.2  | 6.32  |
| Q16878 | Cysteine dioxygenase type 1<br>OS=Homo sapiens<br>GN=CDO1<br>PE=1 SV=2 - [CDO1_HUMAN]            | 7.00  | 1 | 1  | 2  | 14 | 1.073 | 0.171 | 1.197 | 1.052 | 18.48  | 7.00  | 3  | 14 | 200  | 23.0  | 6.60  |
| P51816 | AF4/FMR2 family member 2<br>OS=Homo sapiens<br>GN=AFF2<br>PE=1 SV=4 - [AFF2_HUMAN]               | 1.45  | 1 | 1  | 2  | 2  | 0.682 | 0.816 | 0.713 | 1.052 | 2.58   | 1.45  | 2  | 2  | 1311 | 144.7 | 8.05  |



|        |                                                                                                                       |       |   |    |    |     |       |       |       |       |        |       |     |     |      |       |      |
|--------|-----------------------------------------------------------------------------------------------------------------------|-------|---|----|----|-----|-------|-------|-------|-------|--------|-------|-----|-----|------|-------|------|
| Q9BPX5 | Actin-related protein 2/3 complex subunit 5-like protein<br>OS=Homo sapiens<br>GN=ARPC5L<br>PE=1 SV=1 - [ARP5L_HUMAN] | 34.64 | 1 | 5  | 6  | 39  | 0.975 | 1.101 | 1.073 | 1.052 | 72.66  | 34.64 | 9   | 39  | 153  | 16.9  | 6.60 |
| Q9NQC8 | Intraflagellar transport protein 46 homolog<br>OS=Homo sapiens<br>GN=IFT46<br>PE=1 SV=1 - [IFT46_HUMAN]               | 3.62  | 1 | 1  | 1  | 2   | 1.139 | 1.788 | 1.464 | 1.052 | 3.80   | 3.62  | 2   | 2   | 304  | 34.3  | 4.54 |
| Q99807 | Ubiquinone biosynthesis protein COQ7 homolog<br>OS=Homo sapiens<br>GN=COQ7<br>PE=1 SV=3 - [COQ7_HUMAN]                | 4.15  | 1 | 1  | 1  | 1   | 1.337 | 1.364 | 1.370 | 1.053 | 1.68   | 4.15  | 1   | 1   | 217  | 24.3  | 8.59 |
| C9J6K1 | Putative uncharacterized protein C19orf81<br>OS=Homo sapiens<br>GN=C19orf81<br>PE=4 SV=1 - [CS081_HUMAN]              | 9.09  | 1 | 1  | 1  | 2   | 0.923 | 1.365 | 0.472 | 1.053 | 6.38   | 9.09  | 1   | 2   | 198  | 22.4  | 7.40 |
| P46109 | Crk-like protein<br>OS=Homo sapiens<br>GN=CRKL PE=1 SV=1 - [CRKL_HUMAN]                                               | 41.91 | 1 | 9  | 9  | 24  | 1.020 | 1.546 | 1.072 | 1.053 | 54.03  | 41.91 | 14  | 24  | 303  | 33.8  | 6.74 |
| Q53FA7 | Quinone oxidoreductase PIG3<br>OS=Homo sapiens<br>GN=TP53I3<br>PE=1 SV=2 - [QORX_HUMAN]                               | 19.88 | 1 | 6  | 6  | 26  | 1.547 | 1.196 | 1.376 | 1.053 | 47.91  | 19.88 | 10  | 26  | 332  | 35.5  | 7.17 |
| Q5T2W1 | Na(+)/H(+) exchange regulatory cofactor NHERF3<br>OS=Homo sapiens<br>GN=PDZK1<br>PE=1 SV=2 - [NHERF3_HUMAN]           | 2.70  | 1 | 1  | 1  | 1   | 1.160 | 0.775 | 1.652 | 1.053 | 0.00   | 2.70  | 1   | 1   | 519  | 57.1  | 5.55 |
| Q15075 | Early endosome antigen 1<br>OS=Homo sapiens<br>GN=EAA1<br>PE=1 SV=2 - [EAA1_HUMAN]                                    | 55.92 | 5 | 85 | 88 | 382 | 0.860 | 0.844 | 0.779 | 1.053 | 884.29 | 55.92 | 139 | 382 | 1411 | 162.4 | 5.68 |

|        |                                                                                                                                         |       |   |    |    |     |       |       |       |       |        |       |    |     |      |       |      |
|--------|-----------------------------------------------------------------------------------------------------------------------------------------|-------|---|----|----|-----|-------|-------|-------|-------|--------|-------|----|-----|------|-------|------|
| Q9NZT2 | Opioid growth factor receptor<br>OS=Homo sapiens<br>GN=OGFR<br>PE=1 SV=3 - [OGFR_HUMAN]                                                 | 15.95 | 1 | 9  | 10 | 26  | 1.378 | 1.047 | 1.143 | 1.053 | 70.59  | 15.95 | 12 | 26  | 677  | 73.3  | 4.84 |
| Q86V48 | Leudine zipper protein 1<br>OS=Homo sapiens<br>GN=LUZP1<br>PE=1 SV=2 - [LUZP1_HUMAN]                                                    | 33.18 | 1 | 31 | 33 | 114 | 0.909 | 0.826 | 1.144 | 1.053 | 261.76 | 33.18 | 54 | 114 | 1076 | 120.2 | 8.50 |
| Q9C0E2 | Exportin-4<br>OS=Homo sapiens<br>GN=XPO4<br>PE=1 SV=2 - [XPO4_HUMAN]                                                                    | 4.43  | 1 | 4  | 4  | 6   | 1.002 | 0.785 | 0.804 | 1.053 | 9.31   | 4.43  | 6  | 6   | 1151 | 130.1 | 5.05 |
| O95169 | NADH dehydrogenase [ubiquinone] 1 beta subcomplex subunit 8, mitochondrial<br>OS=Homo sapiens<br>GN=NDUFB8<br>PE=1 SV=1 - [NDUB8_HUMAN] | 19.89 | 1 | 4  | 4  | 7   | 0.687 | 1.024 | 0.934 | 1.053 | 13.75  | 19.89 | 5  | 7   | 186  | 21.8  | 6.80 |
| Q9U9U9 | Protein Smaug homolog 1<br>OS=Homo sapiens<br>GN=SAMD4A<br>PE=1 SV=3 - [SMAG1_HUMAN]                                                    | 8.22  | 1 | 5  | 5  | 10  | 1.070 | 0.824 | 1.054 | 1.053 | 27.77  | 8.22  | 8  | 10  | 718  | 79.4  | 8.32 |
| Q9BUB5 | MAP kinase-interacting serine/threonine-protein kinase 1<br>OS=Homo sapiens<br>GN=MKNK1<br>PE=1 SV=1 - [MKNK1_HUMAN]                    | 4.95  | 1 | 2  | 2  | 3   |       |       |       | 1.053 | 6.03   | 4.95  | 3  | 3   | 465  | 51.3  | 6.68 |
| Q92567 | Protein FAM168A<br>OS=Homo sapiens<br>GN=FAM168A<br>PE=1 SV=2 - [F168A_HUMAN]                                                           | 7.38  | 1 | 2  | 2  | 7   | 0.910 | 0.960 | 1.009 | 1.053 | 11.73  | 7.38  | 4  | 7   | 244  | 26.2  | 8.98 |
| Q9NPH2 | Inositol-3-phosphate synthase 1<br>OS=Homo sapiens<br>GN=ISYNA1<br>PE=1 SV=1 - [INO1_HUMAN]                                             | 8.78  | 1 | 4  | 4  | 8   | 1.635 | 1.942 | 2.919 | 1.053 | 21.04  | 8.78  | 5  | 8   | 558  | 61.0  | 5.76 |
| P11586 | C-1-tetrahydrofolate synthase, cytoplasmic<br>OS=Homo sapiens<br>GN=MTHFD1<br>PE=1 SV=3 - [C1TC_HUMAN]                                  | 42.57 | 1 | 39 | 40 | 192 | 1.096 | 1.176 | 0.901 | 1.054 | 479.55 | 42.57 | 64 | 192 | 935  | 101.5 | 7.30 |

|        |                                                                                                                    |       |   |    |    |     |       |       |       |       |        |       |    |     |      |       |      |
|--------|--------------------------------------------------------------------------------------------------------------------|-------|---|----|----|-----|-------|-------|-------|-------|--------|-------|----|-----|------|-------|------|
| Q9Y3A5 | Ribosome maturation protein SBDS<br>OS=Homo sapiens<br>GN=SBDS<br>PE=1 SV=4 - [SBDS_HUMAN]                         | 44.00 | 1 | 13 | 13 | 42  | 0.976 | 0.784 | 1.052 | 1.054 | 99.44  | 44.00 | 20 | 42  | 250  | 28.7  | 8.75 |
| Q27J81 | Inverted formin-2<br>OS=Homo sapiens<br>GN=INF2 PE=1 SV=2 - [INF2_HUMAN]                                           | 29.22 | 1 | 27 | 27 | 98  | 1.264 | 1.012 | 1.479 | 1.054 | 238.60 | 29.22 | 41 | 98  | 1249 | 135.5 | 5.38 |
| Q8IY17 | Neuropathy target esterase<br>OS=Homo sapiens<br>GN=PNPLA6<br>PE=1 SV=2 - [PLPL6_HUMAN]                            | 12.74 | 1 | 15 | 15 | 41  | 1.114 | 1.051 | 1.149 | 1.054 | 117.19 | 12.74 | 24 | 41  | 1366 | 149.9 | 7.81 |
| P07858 | Cathepsin B<br>OS=Homo sapiens<br>GN=CTSB<br>PE=1 SV=3 - [CATB_HUMAN]                                              | 36.28 | 1 | 15 | 15 | 194 | 0.736 | 1.354 | 1.218 | 1.054 | 459.69 | 36.28 | 24 | 194 | 339  | 37.8  | 6.30 |
| Q15528 | Mediator of RNA polymerase II transcription subunit 22<br>OS=Homo sapiens<br>GN=MED22<br>PE=1 SV=2 - [MED22_HUMAN] | 10.00 | 1 | 2  | 2  | 8   | 0.756 | 1.053 | 0.860 | 1.054 | 19.92  | 10.00 | 3  | 8   | 200  | 22.2  | 4.68 |
| Q8NFJ9 | Bardet-Biedl syndrome 1 protein<br>OS=Homo sapiens<br>GN=BBS1<br>PE=1 SV=1 - [BBS1_HUMAN]                          | 3.71  | 1 | 2  | 2  | 5   | 1.248 | 1.257 | 1.845 | 1.054 | 10.72  | 3.71  | 3  | 5   | 593  | 65.0  | 7.93 |
| Q8NC60 | Nitric oxide-associated protein 1<br>OS=Homo sapiens<br>GN=NOA1<br>PE=1 SV=2 - [NOA1_HUMAN]                        | 4.15  | 1 | 2  | 2  | 2   | 1.073 | 1.207 | 1.208 | 1.054 | 5.44   | 4.15  | 2  | 2   | 698  | 78.4  | 8.66 |
| Q9UPY8 | Microtubule-associated protein RP/EB family member 3<br>OS=Homo sapiens<br>GN=MAPRE3<br>PE=1 SV=1 - [MARE3_HUMAN]  | 29.54 | 1 | 7  | 10 | 24  | 0.706 | 0.719 | 0.966 | 1.054 | 54.18  | 29.54 | 14 | 24  | 281  | 32.0  | 5.54 |
| Q99797 | Mitochondrial intermediate peptidase<br>OS=Homo sapiens<br>GN=MIPEP<br>PE=1 SV=2 - [MIPEP_HUMAN]                   | 18.51 | 1 | 10 | 11 | 25  | 0.822 | 1.191 | 1.018 | 1.054 | 47.05  | 18.51 | 16 | 25  | 713  | 80.6  | 7.05 |

|        |                                                                                                                        |       |   |    |    |    |       |       |       |       |        |       |    |    |      |       |      |
|--------|------------------------------------------------------------------------------------------------------------------------|-------|---|----|----|----|-------|-------|-------|-------|--------|-------|----|----|------|-------|------|
| P23919 | Thymidylate kinase<br>OS=Homo sapiens<br>GN=DTYMK<br>PE=1 SV=4 - [KTHY_HUMAN]                                          | 57.08 | 1 | 14 | 14 | 76 | 1.244 | 1.259 | 0.871 | 1.054 | 186.37 | 57.08 | 22 | 76 | 212  | 23.8  | 8.27 |
| Q43182 | Rho GTPase-activating protein 6<br>OS=Homo sapiens<br>GN=ARHGAP6<br>PE=1 SV=3 - [RHG06_HUMAN]                          | 2.87  | 1 | 2  | 2  | 2  | 0.942 | 1.199 | 1.721 | 1.054 | 0.00   | 2.87  | 2  | 2  | 974  | 105.9 | 7.36 |
| A6NF01 | Putative nuclear envelope pore membrane protein POM121B<br>OS=Homo sapiens<br>GN=POM121B<br>PE=5 SV=2 - [P121B_HUMAN]  | 1.68  | 3 | 1  | 1  | 1  | 0.833 | 1.153 | 0.905 | 1.054 | 3.62   | 1.68  | 1  | 1  | 834  | 83.0  | 9.95 |
| Q8TCS8 | Polyribonucleotide nucleotidyltransferase 1, mitochondrial<br>OS=Homo sapiens<br>GN=PNPT1<br>PE=1 SV=2 - [PNPT1_HUMAN] | 17.11 | 1 | 14 | 14 | 31 | 1.012 | 1.045 | 0.870 | 1.055 | 67.06  | 17.11 | 20 | 31 | 783  | 85.9  | 7.77 |
| Q9Y5B8 | Nucleoside diphosphate kinase 7<br>OS=Homo sapiens<br>GN=NME7<br>PE=1 SV=1 - [NDK7_HUMAN]                              | 13.83 | 1 | 4  | 4  | 6  | 0.709 | 1.305 | 1.086 | 1.055 | 16.16  | 13.83 | 5  | 6  | 376  | 42.5  | 6.47 |
| Q96E39 | RNA binding motif protein, X-linked-like-1<br>OS=Homo sapiens<br>GN=RBMXL1<br>PE=1 SV=1 - [RMLX1_HUMAN]                | 25.13 | 2 | 4  | 11 | 51 | 0.878 | 1.414 | 0.904 | 1.055 | 132.92 | 25.13 | 17 | 51 | 390  | 42.1  | 9.89 |
| Q5JTV8 | Torsin-1A-interacting protein 1<br>OS=Homo sapiens<br>GN=TOR1AIP1<br>PE=1 SV=2 - [TOIP1_HUMAN]                         | 44.08 | 1 | 18 | 19 | 72 | 0.944 | 1.142 | 0.956 | 1.055 | 176.83 | 44.08 | 33 | 72 | 583  | 66.2  | 8.18 |
| P57678 | Gem-associated protein 4<br>OS=Homo sapiens<br>GN=GEMIN4<br>PE=1 SV=2 - [GEM14_HUMAN]                                  | 5.86  | 1 | 5  | 7  | 21 | 0.947 | 0.903 | 1.125 | 1.055 | 39.60  | 5.86  | 12 | 21 | 1058 | 120.0 | 6.04 |

|        |                                                                                                               |       |   |   |   |    |       |       |       |       |       |       |   |    |     |       |      |
|--------|---------------------------------------------------------------------------------------------------------------|-------|---|---|---|----|-------|-------|-------|-------|-------|-------|---|----|-----|-------|------|
| Q8N9U0 | Tandem C2 domains nuclear protein OS=Homo sapiens GN=TC2N PE=1 SV=2 - [TAC2N_HUMAN]                           | 2.24  | 1 | 1 | 1 | 1  | 0.276 | 4.633 | 8.059 | 1.055 | 2.05  | 2.24  | 1 | 1  | 490 | 55.2  | 9.19 |
| Q9H0Z9 | RNA-binding protein 38 OS=Homo sapiens GN=RBM38 PE=1 SV=2 - [RBM38_HUMAN]                                     | 6.69  | 2 | 2 | 2 | 4  | 0.776 | 1.775 | 1.967 | 1.055 | 9.04  | 6.69  | 3 | 4  | 239 | 25.5  | 8.65 |
| Q9HC07 | Transmembrane protein 165 OS=Homo sapiens GN=TMEM165 PE=1 SV=1 - [TM165_HUMAN]                                | 19.44 | 1 | 3 | 3 | 27 | 1.315 | 0.969 | 1.025 | 1.055 | 71.20 | 19.44 | 4 | 27 | 324 | 34.9  | 7.02 |
| O15121 | Sphingolipid delta(4)-desaturase DES1 OS=Homo sapiens GN=DEGS1 PE=1 SV=1 - [DEGS1_HUMAN]                      | 17.96 | 1 | 3 | 4 | 14 | 1.683 | 1.004 | 1.194 | 1.055 | 41.73 | 17.96 | 6 | 14 | 323 | 37.8  | 7.46 |
| Q9UN70 | Protocadherin gamma-C3 OS=Homo sapiens GN=PCDHGC3 PE=1 SV=1 - [PCDGK_HUMAN]                                   | 4.50  | 9 | 3 | 4 | 6  | 1.107 | 1.703 | 1.235 | 1.055 | 13.09 | 4.50  | 5 | 6  | 934 | 101.0 | 5.21 |
| Q9BUE0 | Mediator of RNA polymerase II transcription subunit 18 OS=Homo sapiens GN=MED18 PE=1 SV=1 - [MED18_HUMAN]     | 11.54 | 1 | 2 | 2 | 4  | 0.988 | 0.965 | 0.946 | 1.055 | 4.82  | 11.54 | 3 | 4  | 208 | 23.6  | 6.54 |
| Q96CU9 | FAD-dependent oxidoreductase domain-containing protein 1 OS=Homo sapiens GN=FOXRED1 PE=1 SV=2 - [FXRD1_HUMAN] | 4.32  | 1 | 2 | 2 | 7  | 1.266 | 1.213 | 0.946 | 1.055 | 14.42 | 4.32  | 4 | 7  | 486 | 53.8  | 7.78 |
| Q15633 | RISC-loading complex subunit TARBP2 OS=Homo sapiens GN=TARBP2 PE=1 SV=3 - [TRBP2_HUMAN]                       | 4.92  | 1 | 1 | 2 | 4  | 0.936 | 0.820 | 1.113 | 1.055 | 6.69  | 4.92  | 3 | 4  | 366 | 39.0  | 6.54 |

|        |                                                                                                                                                                                                                                    |       |   |    |    |     |       |       |       |       |        |       |    |     |      |       |      |
|--------|------------------------------------------------------------------------------------------------------------------------------------------------------------------------------------------------------------------------------------|-------|---|----|----|-----|-------|-------|-------|-------|--------|-------|----|-----|------|-------|------|
| Q9Y2L5 | Trafficking<br>protein particle<br>complex<br>subunit 8<br>OS=Homo<br>sapiens<br>GN=TRAPPC8<br>PE=1 SV=2 -<br>[TPPC8_HUMAN<br>]<br>Cytochrome<br>P450 3A43<br>OS=Homo<br>sapiens<br>GN=CYP3A43<br>PE=1 SV=1 -<br>[CP343_HUMAN<br>] | 5.64  | 1 | 8  | 8  | 16  | 1.256 | 1.236 | 1.027 | 1.056 | 32.92  | 5.64  | 13 | 16  | 1435 | 160.9 | 6.87 |
| Q9HB55 | NADPH oxidase<br>organizer 1<br>OS=Homo<br>sapiens<br>GN=NOXO1<br>PE=1 SV=1 -<br>[NOXO1_HUMAN<br>]                                                                                                                                 | 1.39  | 1 | 1  | 1  | 1   | 1.056 | 1.140 | 1.037 | 1.056 | 2.10   | 1.39  | 1  | 1   | 503  | 57.6  | 8.10 |
| Q8NFA2 | Serine/threonine-protein<br>phosphatase 6<br>regulatory<br>ankyrin repeat<br>subunit C<br>OS=Homo<br>sapiens<br>GN=ANKRD52<br>PE=1 SV=3 -<br>[ANR52_HUMAN<br>]                                                                     | 1.86  | 1 | 1  | 1  | 1   | 0.747 | 1.401 | 1.491 | 1.056 | 2.50   | 1.86  | 1  | 1   | 376  | 41.2  | 9.83 |
| Q8NB46 | Galectin-3-<br>binding protein<br>OS=Homo<br>sapiens<br>GN=LGALS3BP<br>PE=1 SV=1 -<br>[LG3BP_HUMAN<br>]                                                                                                                            | 1.77  | 1 | 2  | 2  | 8   | 0.707 | 0.873 | 1.196 | 1.056 | 19.42  | 1.77  | 3  | 8   | 1076 | 115.0 | 6.48 |
| Q08380 | Protein<br>transport<br>protein Sec16A<br>OS=Homo<br>sapiens<br>GN=SEC16A<br>PE=1 SV=3 -<br>[SC16A_HUMAN<br>]                                                                                                                      | 15.04 | 1 | 10 | 10 | 39  | 1.411 | 0.961 | 0.975 | 1.056 | 96.92  | 15.04 | 16 | 39  | 585  | 65.3  | 5.27 |
| O15027 | Sodium/potassium-<br>transporting<br>ATPase subunit<br>alpha-1<br>OS=Homo<br>sapiens<br>GN=ATP1A1<br>PE=1 SV=1 -<br>[AT1A1_HUMAN<br>]                                                                                              | 15.56 | 1 | 24 | 24 | 74  | 0.947 | 1.047 | 1.007 | 1.056 | 163.86 | 15.56 | 38 | 74  | 2179 | 233.4 | 5.63 |
| P05023 | Methyl-CpG-<br>binding protein<br>2 OS=Homo<br>sapiens<br>GN=MECP2<br>PE=1 SV=1 -<br>[MECP2_HUMAN<br>]                                                                                                                             | 45.06 | 4 | 39 | 48 | 384 | 1.570 | 0.839 | 0.722 | 1.056 | 993.96 | 45.06 | 81 | 384 | 1023 | 112.8 | 5.49 |
| P51608 |                                                                                                                                                                                                                                    | 33.54 | 1 | 14 | 14 | 48  | 1.108 | 1.423 | 1.402 | 1.056 | 92.05  | 33.54 | 23 | 48  | 486  | 52.4  | 9.95 |

|        |                                                                                                        |       |   |    |    |     |       |       |       |       |        |       |    |     |      |       |       |
|--------|--------------------------------------------------------------------------------------------------------|-------|---|----|----|-----|-------|-------|-------|-------|--------|-------|----|-----|------|-------|-------|
| P62424 | 60S ribosomal protein L7a<br>OS=Homo sapiens<br>GN=RPL7A<br>PE=1 SV=2 - [RL7A_HUMAN]                   | 54.14 | 1 | 23 | 24 | 156 | 0.864 | 1.066 | 0.982 | 1.056 | 299.22 | 54.14 | 37 | 156 | 266  | 30.0  | 10.61 |
| Q96GF1 | E3 ubiquitin-protein ligase<br>RNF185<br>OS=Homo sapiens<br>GN=RNF185<br>PE=1 SV=1 - [RN185_HUMAN]     | 4.69  | 1 | 1  | 1  | 3   | 1.586 | 0.930 | 1.331 | 1.056 | 4.66   | 4.69  | 2  | 3   | 192  | 20.4  | 6.52  |
| Q9P2C4 | Transmembrane protein 181<br>OS=Homo sapiens<br>GN=TMEM181<br>PE=1 SV=2 - [TM181_HUMAN]                | 2.61  | 1 | 1  | 1  | 4   | 1.350 | 1.065 | 1.030 | 1.056 | 18.29  | 2.61  | 2  | 4   | 612  | 69.3  | 8.92  |
| Q9H061 | Transmembrane protein 126A<br>OS=Homo sapiens<br>GN=TMEM126A<br>PE=1 SV=1 - [T126A_HUMAN]              | 26.67 | 1 | 6  | 6  | 21  | 1.213 | 1.024 | 0.781 | 1.056 | 37.84  | 26.67 | 9  | 21  | 195  | 21.5  | 9.26  |
| Q92888 | Rho guanine nucleotide exchange factor 1<br>OS=Homo sapiens<br>GN=ARHGEF1<br>PE=1 SV=2 - [ARHG1_HUMAN] | 33.00 | 1 | 24 | 25 | 76  | 1.122 | 0.960 | 0.943 | 1.057 | 204.95 | 33.00 | 37 | 76  | 912  | 102.4 | 5.66  |
| Q96KG9 | N-terminal kinase-like protein<br>OS=Homo sapiens<br>GN=SCYL1<br>PE=1 SV=1 - [NTKL_HUMAN]              | 25.87 | 1 | 15 | 15 | 39  | 0.987 | 1.015 | 1.040 | 1.057 | 91.54  | 25.87 | 22 | 39  | 808  | 89.6  | 6.30  |
| O43251 | RNA binding protein fox-1 homolog 2<br>OS=Homo sapiens<br>GN=RBFOX2<br>PE=1 SV=3 - [RFOX2_HUMAN]       | 11.28 | 3 | 4  | 4  | 15  | 1.251 | 1.604 | 1.168 | 1.057 | 32.15  | 11.28 | 7  | 15  | 390  | 41.3  | 7.27  |
| Q96BN8 | Ubiquitin thioesterase otulin<br>OS=Homo sapiens<br>GN=OTULIN<br>PE=1 SV=3 - [OTUL_HUMAN]              | 19.03 | 1 | 6  | 6  | 18  | 0.996 | 0.779 | 0.718 | 1.057 | 37.63  | 19.03 | 9  | 18  | 352  | 40.2  | 5.47  |
| Q6ZUX3 | Protein FAM179A<br>OS=Homo sapiens<br>GN=FAM179A<br>PE=2 SV=2 - [F179A_HUMAN]                          | 2.36  | 1 | 2  | 2  | 3   | 2.134 | 0.710 | 0.627 | 1.057 | 7.43   | 2.36  | 2  | 3   | 1019 | 111.1 | 9.42  |

|        |                                                                                                                       |       |   |    |    |    |       |       |       |       |        |       |    |    |     |       |      |
|--------|-----------------------------------------------------------------------------------------------------------------------|-------|---|----|----|----|-------|-------|-------|-------|--------|-------|----|----|-----|-------|------|
| O14490 | Disk large-associated protein 1<br>OS=Homo sapiens<br>GN=DLGAP1<br>PE=1 SV=1 - [DLGP1_HUMAN]                          | 1.64  | 1 | 1  | 2  | 2  | 0.676 | 1.413 | 2.959 | 1.057 | 4.65   | 1.64  | 2  | 2  | 977 | 108.8 | 7.08 |
| Q8NHZ8 | Anaphase-promoting complex subunit CDC26<br>OS=Homo sapiens<br>GN=CDC26<br>PE=1 SV=1 - [CDC26_HUMAN]                  | 14.12 | 1 | 1  | 1  | 2  | 1.145 | 1.286 | 0.923 | 1.057 | 0.00   | 14.12 | 1  | 2  | 85  | 9.8   | 6.81 |
| Q8TAF3 | WD repeat-containing protein 48<br>OS=Homo sapiens<br>GN=WDR48<br>PE=1 SV=1 - [WDR48_HUMAN]                           | 13.15 | 1 | 7  | 8  | 21 | 1.441 | 1.079 | 1.049 | 1.057 | 51.03  | 13.15 | 11 | 21 | 677 | 76.2  | 7.03 |
| O15446 | DNA-directed RNA polymerase I subunit RPA34<br>OS=Homo sapiens<br>GN=CD3EAP<br>PE=1 SV=1 - [RPA34_HUMAN]              | 6.86  | 1 | 2  | 2  | 5  | 0.814 | 1.073 | 1.281 | 1.057 | 18.07  | 6.86  | 3  | 5  | 510 | 55.0  | 8.51 |
| Q96RK4 | Bardet-Biedl syndrome 4 protein<br>OS=Homo sapiens<br>GN=BBS4<br>PE=1 SV=2 - [BBS4_HUMAN]                             | 3.08  | 2 | 2  | 2  | 4  | 1.180 | 1.045 | 1.262 | 1.057 | 7.49   | 3.08  | 3  | 4  | 519 | 58.2  | 7.31 |
| Q9Y2Z4 | Tyrosine--tRNA ligase, mitochondrial<br>OS=Homo sapiens<br>GN=YARS2<br>PE=1 SV=2 - [SYYM_HUMAN]                       | 12.58 | 1 | 5  | 5  | 11 | 0.968 | 1.205 | 1.049 | 1.057 | 34.39  | 12.58 | 9  | 11 | 477 | 53.2  | 8.98 |
| Q9NTG7 | NAD-dependent protein deacetylase sirtuin-3, mitochondrial<br>OS=Homo sapiens<br>GN=SIRT3<br>PE=1 SV=2 - [SIR3_HUMAN] | 11.53 | 1 | 3  | 3  | 5  | 1.729 | 2.208 | 1.321 | 1.057 | 5.13   | 11.53 | 4  | 5  | 399 | 43.5  | 8.70 |
| P51665 | 26S proteasome non-ATPase regulatory subunit 7<br>OS=Homo sapiens<br>GN=PSMD7<br>PE=1 SV=2 - [PSMD7_HUMAN]            | 41.67 | 1 | 11 | 11 | 51 | 1.036 | 1.243 | 1.186 | 1.057 | 140.72 | 41.67 | 20 | 51 | 324 | 37.0  | 6.77 |



|        |                                                                                                                    |       |   |    |    |     |       |       |       |       |        |       |    |     |      |       |      |
|--------|--------------------------------------------------------------------------------------------------------------------|-------|---|----|----|-----|-------|-------|-------|-------|--------|-------|----|-----|------|-------|------|
| O60725 | Protein-S-isoprenylcysteine O-methyltransferase OS=Homo sapiens<br>GN=ICMT<br>PE=1 SV=1 - [ICMT_HUMAN]             | 3.17  | 1 | 1  | 1  | 1   | 1.285 | 0.730 | 0.673 | 1.058 | 0.00   | 3.17  | 1  | 1   | 284  | 31.9  | 7.96 |
| Q96M27 | Protein PRRC1 OS=Homo sapiens<br>GN=PRRC1<br>PE=1 SV=1 - [PRRC1_HUMAN]                                             | 30.79 | 1 | 10 | 10 | 37  | 0.889 | 0.943 | 0.866 | 1.058 | 93.01  | 30.79 | 17 | 37  | 445  | 46.7  | 5.83 |
| Q9C037 | E3 ubiquitin-protein ligase TRIM4 OS=Homo sapiens<br>GN=TRIM4<br>PE=1 SV=2 - [TRIM4_HUMAN]                         | 20.00 | 1 | 11 | 11 | 27  | 0.853 | 0.957 | 0.919 | 1.058 | 55.95  | 20.00 | 17 | 27  | 500  | 57.4  | 8.10 |
| O14559 | Rho GTPase-activating protein 33 OS=Homo sapiens<br>GN=ARHGAP33<br>PE=1 SV=2 - [RHG33_HUMAN]                       | 1.63  | 1 | 1  | 1  | 1   | 1.010 | 1.049 | 0.599 | 1.058 | 3.49   | 1.63  | 1  | 1   | 1287 | 137.1 | 8.75 |
| Q14157 | Ubiquitin-associated protein 2-like OS=Homo sapiens<br>GN=UBAP2L<br>PE=1 SV=2 - [UBP2L_HUMAN]                      | 21.71 | 1 | 19 | 19 | 135 | 1.008 | 1.097 | 1.003 | 1.058 | 373.67 | 21.71 | 27 | 135 | 1087 | 114.5 | 7.11 |
| P25325 | 3-mercaptopyruvate sulfurtransferase OS=Homo sapiens<br>GN=MPST<br>PE=1 SV=3 - [THTM_HUMAN]                        | 28.62 | 1 | 6  | 7  | 17  | 1.344 | 1.185 | 1.064 | 1.058 | 40.94  | 28.62 | 10 | 17  | 297  | 33.2  | 6.60 |
| Q6IQ23 | Pleckstrin homology domain-containing family A member 7 OS=Homo sapiens<br>GN=PLEKHA7<br>PE=1 SV=2 - [PKHA7_HUMAN] | 1.61  | 1 | 1  | 1  | 1   | 1.103 | 1.067 | 1.811 | 1.058 | 0.00   | 1.61  | 1  | 1   | 1121 | 127.1 | 9.35 |
| P49674 | Casein kinase I isoform epsilon OS=Homo sapiens<br>GN=CSNK1E<br>PE=1 SV=1 - [KC1E_HUMAN]                           | 19.47 | 1 | 3  | 7  | 18  | 1.100 | 1.143 | 1.066 | 1.058 | 42.84  | 19.47 | 10 | 18  | 416  | 47.3  | 9.66 |
| P10909 | Clusterin OS=Homo sapiens<br>GN=CLU PE=1 SV=1 - [CLUS_HUMAN]                                                       | 18.04 | 1 | 7  | 7  | 23  | 0.521 | 1.527 | 2.540 | 1.058 | 63.81  | 18.04 | 10 | 23  | 449  | 52.5  | 6.27 |

|        |                                                                                                          |       |   |    |    |     |       |       |       |       |        |       |    |     |      |       |       |
|--------|----------------------------------------------------------------------------------------------------------|-------|---|----|----|-----|-------|-------|-------|-------|--------|-------|----|-----|------|-------|-------|
| Q8TBF2 | Prostamide/prostaglandin F synthase<br>OS=Homo sapiens<br>GN=FAM213B<br>PE=2 SV=1 - [PGFS_HUMAN]         | 9.60  | 1 | 2  | 2  | 5   | 0.966 | 1.265 | 1.322 | 1.059 | 18.26  | 9.60  | 3  | 5   | 198  | 21.2  | 6.67  |
| Q9BSF4 | Uncharacterized protein C19orf52<br>OS=Homo sapiens<br>GN=C19orf52<br>PE=1 SV=2 - [CS052_HUMAN]          | 11.54 | 1 | 2  | 2  | 8   | 0.870 | 0.827 | 0.870 | 1.059 | 26.37  | 11.54 | 4  | 8   | 260  | 29.2  | 8.09  |
| Q86XK2 | F-box only protein 11<br>OS=Homo sapiens<br>GN=FBXO11<br>PE=1 SV=3 - [FBX11_HUMAN]                       | 1.08  | 1 | 1  | 1  | 3   | 1.237 | 0.899 | 1.219 | 1.059 | 2.37   | 1.08  | 1  | 3   | 927  | 103.5 | 6.99  |
| Q8ND04 | Protein SMG8<br>OS=Homo sapiens<br>GN=SMG8<br>PE=1 SV=1 - [SMG8_HUMAN]                                   | 2.12  | 1 | 2  | 3  | 3   | 0.937 | 0.902 | 1.191 | 1.059 | 4.58   | 2.12  | 3  | 3   | 991  | 109.6 | 7.68  |
| Q15006 | ER membrane protein complex subunit 2<br>OS=Homo sapiens<br>GN=EMC2<br>PE=1 SV=1 - [EMC2_HUMAN]          | 26.60 | 1 | 8  | 8  | 20  | 1.090 | 0.914 | 1.051 | 1.059 | 39.67  | 26.60 | 13 | 20  | 297  | 34.8  | 6.57  |
| Q5JRA6 | Melanoma inhibitory activity protein 3<br>OS=Homo sapiens<br>GN=MIA3<br>PE=1 SV=1 - [MIA3_HUMAN]         | 19.72 | 1 | 35 | 36 | 132 | 0.841 | 0.994 | 0.932 | 1.059 | 304.86 | 19.72 | 54 | 132 | 1907 | 213.6 | 4.84  |
| Q9P2E3 | NFX1-type zinc finger-containing protein 1<br>OS=Homo sapiens<br>GN=ZNXF1<br>PE=1 SV=2 - [ZNXF1_HUMAN]   | 4.54  | 1 | 7  | 7  | 29  | 0.834 | 0.940 | 1.243 | 1.059 | 53.19  | 4.54  | 9  | 29  | 1918 | 220.1 | 7.30  |
| A2RU67 | Uncharacterized protein KIAA1467<br>OS=Homo sapiens<br>GN=KIAA1467<br>PE=1 SV=1 - [K1467_HUMAN]          | 3.22  | 1 | 2  | 2  | 3   | 1.102 | 0.461 | 0.376 | 1.059 | 10.62  | 3.22  | 2  | 3   | 622  | 67.0  | 5.02  |
| Q8TF74 | WAS/WASL-interacting protein family member 2<br>OS=Homo sapiens<br>GN=WIPF2<br>PE=1 SV=1 - [WIPF2_HUMAN] | 28.86 | 1 | 9  | 9  | 31  | 1.162 | 0.888 | 1.068 | 1.059 | 73.05  | 28.86 | 14 | 31  | 440  | 46.3  | 10.93 |

|        |                                                                                                                        |       |   |    |    |     |       |       |       |       |        |       |    |     |      |       |      |
|--------|------------------------------------------------------------------------------------------------------------------------|-------|---|----|----|-----|-------|-------|-------|-------|--------|-------|----|-----|------|-------|------|
| O43493 | Trans-Golgi network integral membrane protein 2<br>OS=Homo sapiens<br>GN=TGOLN2<br>PE=1 SV=2 - [TGON2_HUMA]            | 29.17 | 1 | 12 | 12 | 50  | 0.864 | 0.739 | 0.924 | 1.059 | 109.72 | 29.17 | 17 | 50  | 480  | 51.1  | 5.73 |
| O75396 | Vesicle-trafficking protein SEC22b<br>OS=Homo sapiens<br>GN=SEC22B<br>PE=1 SV=4 - [SC22B_HUMAN]                        | 44.19 | 1 | 9  | 9  | 185 | 0.891 | 0.848 | 0.925 | 1.059 | 423.15 | 44.19 | 16 | 185 | 215  | 24.6  | 6.92 |
| P45985 | Dual specificity mitogen-activated protein kinase kinase 4<br>OS=Homo sapiens<br>GN=MAP2K4<br>PE=1 SV=1 - [MP2K4_HUMA] | 17.79 | 1 | 6  | 6  | 22  | 1.028 | 1.045 | 0.914 | 1.059 | 43.07  | 17.79 | 12 | 22  | 399  | 44.3  | 8.07 |
| P08047 | Transcription factor Sp1<br>OS=Homo sapiens<br>GN=SP1 PE=1 SV=3 - [SP1_HUMAN]                                          | 3.57  | 1 | 2  | 2  | 3   | 1.591 | 0.769 | 1.014 | 1.060 | 1.92   | 3.57  | 2  | 3   | 785  | 80.6  | 7.34 |
| Q9UIA9 | Exportin-7<br>OS=Homo sapiens<br>GN=XPO7<br>PE=1 SV=3 - [XPO7_HUMAN]                                                   | 16.65 | 1 | 16 | 17 | 34  | 1.039 | 1.071 | 1.065 | 1.060 | 76.66  | 16.65 | 26 | 34  | 1087 | 123.8 | 6.32 |
| Q9UJW9 | SERTA domain-containing protein 3<br>OS=Homo sapiens<br>GN=SERTAD3<br>PE=1 SV=2 - [SRTD3_HUMAN]                        | 3.06  | 1 | 1  | 1  | 1   | 0.849 | 0.838 | 1.025 | 1.060 | 2.53   | 3.06  | 1  | 1   | 196  | 21.8  | 4.67 |
| Q8IWW6 | Rho GTPase-activating protein 12<br>OS=Homo sapiens<br>GN=ARHGAP12<br>PE=1 SV=1 - [RHG12_HUMAN]                        | 9.34  | 1 | 8  | 8  | 15  | 0.894 | 1.019 | 1.069 | 1.060 | 43.28  | 9.34  | 11 | 15  | 846  | 96.2  | 7.61 |
| Q9ULB4 | Cadherin-9<br>OS=Homo sapiens<br>GN=CDH9<br>PE=2 SV=2 - [CADH9_HUMAN]                                                  | 1.90  | 1 | 1  | 1  | 1   | 1.159 | 0.756 | 0.922 | 1.060 | 3.25   | 1.90  | 1  | 1   | 789  | 88.6  | 4.91 |
| Q92844 | TRAF family member-associated NF-kappa-B activator<br>OS=Homo sapiens<br>GN=TANK<br>PE=1 SV=2 - [TANK_HUMAN]           | 8.24  | 1 | 4  | 4  | 6   | 1.327 | 1.019 | 1.038 | 1.060 | 13.90  | 8.24  | 6  | 6   | 425  | 47.8  | 5.68 |

|        |                                                                                                                                                                                                                               |       |   |    |    |     |       |       |       |       |        |       |    |     |      |       |      |
|--------|-------------------------------------------------------------------------------------------------------------------------------------------------------------------------------------------------------------------------------|-------|---|----|----|-----|-------|-------|-------|-------|--------|-------|----|-----|------|-------|------|
| Q01432 | AMP<br>deaminase 3<br>OS=Homo<br>sapiens<br>GN=AMPD3<br>PE=1 SV=1 -<br>[AMPD3_HUMA<br>Putative<br>uncharacterize<br>d protein<br>encoded by<br>LINC00470<br>OS=Homo<br>sapiens<br>GN=LINC00470<br>PE=5 SV=1 -<br>[CR002_HUMAN | 14.73 | 2 | 12 | 13 | 34  | 1.103 | 0.835 | 1.634 | 1.060 | 69.68  | 14.73 | 18 | 34  | 767  | 88.8  | 6.98 |
| Q9BZP3 | Tyrosine-<br>protein<br>phosphatase<br>non-receptor<br>type 2<br>OS=Homo<br>sapiens<br>GN=PTPN2<br>PE=1 SV=2 -<br>[PTN2_HUMAN                                                                                                 | 16.28 | 1 | 1  | 1  | 1   | 0.557 |       |       | 1.060 | 0.00   | 16.28 | 1  | 1   | 86   | 9.6   | 5.01 |
| P17706 | Guanine<br>nucleotide-<br>binding protein<br>subunit alpha-<br>13 OS=Homo<br>sapiens<br>GN=GNA13<br>PE=1 SV=2 -<br>[GNA13_HUMAN<br>)                                                                                          | 1.69  | 1 | 1  | 1  | 4   | 0.730 | 0.902 | 0.776 | 1.060 | 6.20   | 1.69  | 2  | 4   | 415  | 48.4  | 8.29 |
| Q14344 | Isoleucine--<br>tRNA ligase,<br>mitochondrial<br>OS=Homo<br>sapiens<br>GN=IARS2<br>PE=1 SV=2 -<br>[SY1M_HUMAN]                                                                                                                | 35.28 | 1 | 11 | 13 | 56  | 1.375 | 1.040 | 0.788 | 1.060 | 153.45 | 35.28 | 24 | 56  | 377  | 44.0  | 8.00 |
| Q9NSE4 | DNA annealing<br>helicase and<br>endonuclease<br>ZRANB3<br>OS=Homo<br>sapiens<br>GN=ZRANB3<br>PE=1 SV=2 -<br>[ZRAB3_HUMAN<br>)                                                                                                | 29.94 | 1 | 28 | 28 | 101 | 1.002 | 1.142 | 1.002 | 1.060 | 269.23 | 29.94 | 43 | 101 | 1012 | 113.7 | 7.20 |
| Q5FWF4 | Ubiquitin-<br>conjugating<br>enzyme E2 N<br>OS=Homo<br>sapiens<br>GN=UBE2N<br>PE=1 SV=1 -<br>[UBE2N_HUMAN<br>)                                                                                                                | 0.56  | 1 | 1  | 1  | 1   | 0.877 | 1.166 | 1.558 | 1.060 | 1.75   | 0.56  | 1  | 1   | 1079 | 123.2 | 8.44 |
| P61088 | 5'-3'<br>exoribonucleas<br>e 1 OS=Homo<br>sapiens<br>GN=XRNI<br>PE=1 SV=1 -<br>[XRNI_HUMAN]                                                                                                                                   | 65.79 | 2 | 10 | 10 | 90  | 1.114 | 0.992 | 1.024 | 1.060 | 217.96 | 65.79 | 16 | 90  | 152  | 17.1  | 6.57 |
| Q8IZH2 |                                                                                                                                                                                                                               | 9.03  | 1 | 14 | 14 | 41  | 1.031 | 1.123 | 0.944 | 1.060 | 103.44 | 9.03  | 23 | 41  | 1706 | 194.0 | 7.21 |

|        |                                                                                                     |       |   |    |    |     |       |       |       |       |        |       |    |     |      |       |      |
|--------|-----------------------------------------------------------------------------------------------------|-------|---|----|----|-----|-------|-------|-------|-------|--------|-------|----|-----|------|-------|------|
| Q96CM4 | EVI5-like protein<br>OS=Homo sapiens<br>GN=EVI5L<br>PE=1 SV=1 - [EVI5L_HUMAN]                       | 3.53  | 1 | 3  | 3  | 13  | 0.921 | 1.139 | 1.327 | 1.061 | 18.49  | 3.53  | 6  | 13  | 794  | 91.3  | 5.34 |
| Q00796 | Sorbitol dehydrogenase<br>OS=Homo sapiens<br>GN=SORD<br>PE=1 SV=4 - [DHSO_HUMAN]                    | 25.77 | 1 | 9  | 9  | 33  | 1.062 | 0.868 | 0.837 | 1.061 | 72.58  | 25.77 | 15 | 33  | 357  | 38.3  | 7.97 |
| Q9Y3I1 | F-box only protein 7<br>OS=Homo sapiens<br>GN=FBXO7<br>PE=1 SV=1 - [FBX7_HUMAN]                     | 5.36  | 1 | 2  | 2  | 2   | 0.219 | 0.196 | 0.751 | 1.061 | 2.82   | 5.36  | 2  | 2   | 522  | 58.5  | 6.55 |
| Q6PHR2 | Serine/threonine-protein kinase ULK3<br>OS=Homo sapiens<br>GN=ULK3 PE=1 SV=2 - [ULK3_HUMAN]         | 4.45  | 1 | 2  | 2  | 5   | 0.897 | 0.156 | 0.638 | 1.061 | 3.08   | 4.45  | 3  | 5   | 472  | 53.4  | 7.36 |
| Q15334 | Lethal(2) giant larvae protein homolog 1<br>OS=Homo sapiens<br>GN=LGL1<br>PE=1 SV=3 - [L2GL1_HUMAN] | 11.56 | 1 | 10 | 10 | 21  | 1.299 | 1.080 | 1.323 | 1.061 | 51.19  | 11.56 | 16 | 21  | 1064 | 115.3 | 6.29 |
| Q13501 | Sequestosome-1<br>OS=Homo sapiens<br>GN=SQSTM1<br>PE=1 SV=1 - [SQSTM_HUMAN]                         | 23.41 | 1 | 8  | 8  | 28  | 0.758 | 0.766 | 0.962 | 1.061 | 77.91  | 23.41 | 12 | 28  | 440  | 47.7  | 5.22 |
| O15270 | Serine palmitoyltransferase 2<br>OS=Homo sapiens<br>GN=SPTLC2<br>PE=1 SV=1 - [SPTC2_HUMAN]          | 10.32 | 1 | 5  | 5  | 12  | 0.940 | 0.803 | 1.104 | 1.061 | 24.34  | 10.32 | 8  | 12  | 562  | 62.9  | 7.78 |
| P07942 | Laminin subunit beta-1<br>OS=Homo sapiens<br>GN=LAMB1<br>PE=1 SV=2 - [LAMB1_HUMAN]                  | 27.10 | 1 | 47 | 48 | 126 | 1.024 | 1.004 | 0.841 | 1.061 | 314.74 | 27.10 | 66 | 126 | 1786 | 197.9 | 4.94 |
| P30042 | ES1 protein homolog, mitochondrial<br>OS=Homo sapiens<br>GN=C21orf33<br>PE=1 SV=3 - [ES1_HUMAN]     | 37.69 | 1 | 9  | 9  | 42  | 0.991 | 1.392 | 1.029 | 1.061 | 124.10 | 37.69 | 15 | 42  | 268  | 28.2  | 8.27 |

|        |                                                                                                                           |       |   |    |    |    |       |       |       |       |        |       |    |    |     |      |      |
|--------|---------------------------------------------------------------------------------------------------------------------------|-------|---|----|----|----|-------|-------|-------|-------|--------|-------|----|----|-----|------|------|
| Q86VH4 | Leucine-rich repeat transmembrane neuronal protein 4<br>OS=Homo sapiens<br>GN=LRRTM4<br>PE=2 SV=2 - [LRRT4_HUMAN]         | 1.02  | 1 | 1  | 1  | 1  | 0.761 | 0.857 | 1.053 | 1.061 | 0.00   | 1.02  | 1  | 1  | 590 | 67.2 | 8.95 |
| Q9H7D7 | WD repeat-containing protein 26<br>OS=Homo sapiens<br>GN=WDR26<br>PE=1 SV=3 - [WDR26_HUMAN]                               | 5.90  | 1 | 3  | 3  | 7  | 1.085 | 0.716 | 1.126 | 1.061 | 19.07  | 5.90  | 6  | 7  | 661 | 72.1 | 6.16 |
| Q96B45 | UPF0693 protein C10orf32<br>OS=Homo sapiens<br>GN=C10orf32<br>PE=1 SV=1 - [C1032_HUMAN]                                   | 28.57 | 1 | 2  | 2  | 9  | 1.273 | 1.159 | 1.130 | 1.062 | 25.97  | 28.57 | 4  | 9  | 105 | 11.6 | 6.79 |
| Q9BYI3 | Hycin<br>OS=Homo sapiens<br>GN=FAM126A<br>PE=1 SV=2 - [HYCCI_HUMAN]                                                       | 10.17 | 1 | 5  | 5  | 19 | 0.972 | 0.978 | 1.041 | 1.062 | 45.81  | 10.17 | 8  | 19 | 521 | 57.6 | 8.16 |
| P04080 | Cystatin-B<br>OS=Homo sapiens<br>GN=CSTB<br>PE=1 SV=2 - [CYTB_HUMAN]                                                      | 61.22 | 1 | 5  | 5  | 53 | 1.459 | 0.979 | 0.872 | 1.062 | 119.31 | 61.22 | 9  | 53 | 98  | 11.1 | 7.56 |
| Q96S82 | Ubiquitin-like protein 7<br>OS=Homo sapiens<br>GN=UBL7 PE=1 SV=2 - [UBL7_HUMAN]                                           | 8.68  | 1 | 2  | 3  | 15 | 0.703 | 1.117 | 1.363 | 1.062 | 32.55  | 8.68  | 5  | 15 | 380 | 40.5 | 5.07 |
| P11177 | Pyruvate dehydrogenase E1 component subunit beta, mitochondrial<br>OS=Homo sapiens<br>GN=PDHB<br>PE=1 SV=3 - [ODPB_HUMAN] | 34.54 | 1 | 10 | 10 | 79 | 0.985 | 1.304 | 1.173 | 1.062 | 190.51 | 34.54 | 18 | 79 | 359 | 39.2 | 6.65 |
| Q9Y6M1 | Insulin-like growth factor 2 mRNA-binding protein 2<br>OS=Homo sapiens<br>GN=IGF2BP2<br>PE=1 SV=2 - [IF2B2_HUMAN]         | 33.56 | 1 | 15 | 17 | 68 | 0.998 | 0.811 | 0.845 | 1.062 | 176.37 | 33.56 | 27 | 68 | 599 | 66.1 | 8.46 |
| Q96N66 | Lysophospholipid acyltransferase 7<br>OS=Homo sapiens<br>GN=MBOAT7<br>PE=1 SV=2 - [MBOA7_HUMAN]                           | 8.26  | 1 | 5  | 5  | 22 | 0.964 | 0.980 | 0.898 | 1.062 | 52.75  | 8.26  | 8  | 22 | 472 | 52.7 | 8.97 |

|        |                                                                                                                        |       |   |    |    |     |       |       |       |       |        |       |    |     |      |       |      |
|--------|------------------------------------------------------------------------------------------------------------------------|-------|---|----|----|-----|-------|-------|-------|-------|--------|-------|----|-----|------|-------|------|
| O75420 | PERQ amino acid-rich with GYF domain-containing protein 1<br>OS=Homo sapiens<br>GN=GLGYF1<br>PE=1 SV=2 - [PERQ1_HUMAN] | 3.29  | 1 | 3  | 3  | 15  | 1.022 | 0.993 | 0.995 | 1.062 | 46.81  | 3.29  | 5  | 15  | 1035 | 114.5 | 5.39 |
| Q9Y343 | Sorting nexin-24 OS=Homo sapiens<br>GN=SNX24<br>PE=1 SV=1 - [SNX24_HUMAN]                                              | 4.14  | 1 | 1  | 1  | 3   | 1.341 | 1.040 | 0.997 | 1.062 | 6.11   | 4.14  | 2  | 3   | 169  | 19.8  | 7.24 |
| Q9HIK0 | Rabenosyn-5 OS=Homo sapiens<br>GN=ZFYVE20<br>PE=1 SV=2 - [RBNS5_HUMAN]                                                 | 7.27  | 1 | 6  | 6  | 10  | 1.181 | 0.988 | 1.219 | 1.062 | 22.16  | 7.27  | 8  | 10  | 784  | 88.8  | 5.50 |
| P02656 | Apolipoprotein C-III OS=Homo sapiens<br>GN=APOC3<br>PE=1 SV=1 - [APOC3_HUMAN]                                          | 16.16 | 1 | 1  | 1  | 4   | 0.952 | 0.536 | 0.846 | 1.062 | 9.51   | 16.16 | 2  | 4   | 99   | 10.8  | 5.41 |
| O75886 | Signal transducing adapter molecule 2 OS=Homo sapiens<br>GN=STAM2<br>PE=1 SV=1 - [STAM2_HUMAN]                         | 12.57 | 1 | 5  | 7  | 18  | 0.980 | 1.066 | 1.134 | 1.063 | 39.16  | 12.57 | 12 | 18  | 525  | 58.1  | 5.07 |
| O43396 | Thioredoxin-like protein 1 OS=Homo sapiens<br>GN=TXNL1<br>PE=1 SV=3 - [TXNL1_HUMAN]                                    | 49.83 | 1 | 10 | 10 | 60  | 1.262 | 1.066 | 1.169 | 1.063 | 166.38 | 49.83 | 16 | 60  | 289  | 32.2  | 4.96 |
| Q8IUR7 | Armadillo repeat-containing protein 8 OS=Homo sapiens<br>GN=ARMC8<br>PE=1 SV=2 - [ARMC8_HUMAN]                         | 13.22 | 1 | 7  | 7  | 17  | 1.028 | 1.123 | 1.097 | 1.063 | 47.30  | 13.22 | 11 | 17  | 673  | 75.5  | 6.73 |
| P40939 | Trifunctional enzyme subunit alpha, mitochondrial OS=Homo sapiens<br>GN=HADHA<br>PE=1 SV=2 - [ECHA_HUMAN]              | 53.21 | 1 | 44 | 45 | 309 | 0.965 | 1.033 | 1.023 | 1.063 | 768.80 | 53.21 | 71 | 309 | 763  | 82.9  | 9.04 |
| Q9NZ45 | CDGSH iron-sulfur domain-containing protein 1 OS=Homo sapiens<br>GN=CISD1<br>PE=1 SV=1 - [CISD1_HUMAN]                 | 43.52 | 1 | 4  | 4  | 18  | 0.885 | 1.065 | 0.748 | 1.063 | 56.88  | 43.52 | 6  | 18  | 108  | 12.2  | 9.09 |

|        |                                                                                                           |       |   |    |    |     |       |       |       |       |        |       |    |     |      |       |      |
|--------|-----------------------------------------------------------------------------------------------------------|-------|---|----|----|-----|-------|-------|-------|-------|--------|-------|----|-----|------|-------|------|
| Q96DM3 | Uncharacterized protein C18orf8<br>OS=Homo sapiens<br>GN=C18orf8<br>PE=2 SV=2 - [MIC1_HUMAN]              | 5.18  | 1 | 3  | 3  | 7   | 1.150 | 1.106 | 1.049 | 1.063 | 17.75  | 5.18  | 5  | 7   | 657  | 74.9  | 7.83 |
| Q5SSJ5 | Heterochromatin protein 1-binding protein 3<br>OS=Homo sapiens<br>GN=HP1BP3<br>PE=1 SV=1 - [HP1B3_HUMAN]  | 34.90 | 1 | 23 | 23 | 148 | 1.350 | 1.099 | 0.816 | 1.063 | 309.76 | 34.90 | 39 | 148 | 553  | 61.2  | 9.67 |
| Q13395 | Probable methyltransferase TARBP1<br>OS=Homo sapiens<br>GN=TARBP1<br>PE=1 SV=1 - [TARB1_HUMAN]            | 1.36  | 1 | 2  | 3  | 6   | 0.956 | 1.003 | 1.300 | 1.064 | 4.53   | 1.36  | 3  | 6   | 1621 | 181.6 | 7.05 |
| Q99497 | Protein DJ-1<br>OS=Homo sapiens<br>GN=PARK7<br>PE=1 SV=2 - [PARK7_HUMAN]                                  | 81.48 | 1 | 20 | 20 | 272 | 1.078 | 1.046 | 0.997 | 1.064 | 690.38 | 81.48 | 34 | 272 | 189  | 19.9  | 6.79 |
| Q6NXT1 | Ankyrin repeat domain-containing protein 54<br>OS=Homo sapiens<br>GN=ANKRD54<br>PE=1 SV=2 - [ANR54_HUMAN] | 4.33  | 1 | 2  | 2  | 3   | 1.016 | 1.068 | 1.033 | 1.064 | 4.49   | 4.33  | 3  | 3   | 300  | 32.5  | 6.28 |
| P52895 | Aldo-keto reductase family 1 member C2<br>OS=Homo sapiens<br>GN=AKR1C2<br>PE=1 SV=3 - [AK1C2_HUMAN]       | 54.49 | 1 | 2  | 14 | 171 | 1.784 | 0.799 | 0.641 | 1.064 | 404.98 | 54.49 | 20 | 171 | 323  | 36.7  | 7.49 |
| O43491 | Band 4.1-like protein 2<br>OS=Homo sapiens<br>GN=EPB41L2<br>PE=1 SV=1 - [E41L2_HUMAN]                     | 56.42 | 1 | 51 | 55 | 301 | 2.250 | 0.734 | 0.810 | 1.064 | 695.73 | 56.42 | 89 | 301 | 1005 | 112.5 | 5.44 |
| O15269 | Serine palmitoyltransferase 1<br>OS=Homo sapiens<br>GN=SPTLC1<br>PE=1 SV=1 - [SPTC1_HUMAN]                | 31.50 | 1 | 12 | 12 | 36  | 0.975 | 0.971 | 0.796 | 1.064 | 111.30 | 31.50 | 19 | 36  | 473  | 52.7  | 6.01 |
| P50548 | ETS domain-containing transcription factor ERF<br>OS=Homo sapiens<br>GN=ERF PE=1 SV=2 - [ERF_HUMAN]       | 6.39  | 1 | 3  | 3  | 4   | 1.124 | 1.087 | 1.020 | 1.064 | 7.08   | 6.39  | 4  | 4   | 548  | 58.7  | 7.30 |



|        |                                                                                                                  |       |   |    |    |    |       |       |       |       |        |       |    |    |      |       |      |
|--------|------------------------------------------------------------------------------------------------------------------|-------|---|----|----|----|-------|-------|-------|-------|--------|-------|----|----|------|-------|------|
| Q99700 | Ataxin-2<br>OS=Homo sapiens<br>GN=ATXN2<br>PE=1 SV=2 - [ATX2_HUMAN]                                              | 15.99 | 1 | 16 | 19 | 65 | 1.026 | 1.083 | 1.047 | 1.064 | 173.41 | 15.99 | 30 | 65 | 1313 | 140.2 | 9.57 |
| Q6NXR0 | Interferon-inducible GTPase 5<br>OS=Homo sapiens<br>GN=IRGC PE=2<br>SV=1 - [IIGP5_HUMAN]                         | 9.50  | 2 | 3  | 4  | 5  | 0.719 | 1.066 | 1.536 | 1.064 | 6.58   | 9.50  | 4  | 5  | 463  | 50.3  | 5.35 |
| A6NHZ5 | Leucine-rich repeat-containing protein 14B<br>OS=Homo sapiens<br>GN=LRRC14B<br>PE=3 SV=3 - [LR14B_HUMAN]         | 1.56  | 1 | 1  | 1  | 1  | 1.208 | 1.100 | 1.123 | 1.065 | 0.00   | 1.56  | 1  | 1  | 514  | 56.7  | 7.17 |
| Q9H6K1 | Uncharacterized protein C6orf106<br>OS=Homo sapiens<br>GN=C6orf106<br>PE=1 SV=2 - [CF106_HUMAN]                  | 4.70  | 1 | 1  | 1  | 2  | 1.069 | 1.927 | 5.531 | 1.065 | 0.00   | 4.70  | 1  | 2  | 298  | 32.9  | 4.58 |
| Q9Y6C2 | EMILIN-1<br>OS=Homo sapiens<br>GN=EMILIN1<br>PE=1 SV=2 - [EMIL1_HUMAN]                                           | 14.67 | 1 | 12 | 13 | 35 | 0.593 | 1.447 | 1.168 | 1.065 | 85.72  | 14.67 | 21 | 35 | 1016 | 106.6 | 5.15 |
| Q92820 | Gamma-glutamyl hydrolase<br>OS=Homo sapiens<br>GN=GGH PE=1<br>SV=2 - [GGH_HUMAN]                                 | 27.67 | 1 | 8  | 8  | 36 | 1.194 | 1.570 | 0.927 | 1.065 | 96.28  | 27.67 | 11 | 36 | 318  | 35.9  | 7.11 |
| Q2M389 | WASH complex subunit 7<br>OS=Homo sapiens<br>GN=KIAA1033<br>PE=1 SV=2 - [WASH7_HUMAN]                            | 13.73 | 1 | 14 | 14 | 40 | 1.178 | 0.985 | 1.049 | 1.065 | 88.96  | 13.73 | 24 | 40 | 1173 | 136.3 | 7.44 |
| P53992 | Protein transport protein Sec24C<br>OS=Homo sapiens<br>GN=SEC24C<br>PE=1 SV=3 - [SC24C_HUMAN]                    | 20.75 | 1 | 20 | 22 | 80 | 1.148 | 0.842 | 1.120 | 1.065 | 200.93 | 20.75 | 31 | 80 | 1094 | 118.2 | 7.06 |
| Q96IU4 | Alpha/beta hydrolase domain-containing protein 14B<br>OS=Homo sapiens<br>GN=ABHD14B<br>PE=1 SV=1 - [ABHEB_HUMAN] | 34.76 | 1 | 5  | 5  | 39 | 0.987 | 0.687 | 0.750 | 1.066 | 94.65  | 34.76 | 10 | 39 | 210  | 22.3  | 6.40 |

|        |                                                                                                        |       |   |    |    |    |       |       |       |       |        |       |    |    |      |       |      |
|--------|--------------------------------------------------------------------------------------------------------|-------|---|----|----|----|-------|-------|-------|-------|--------|-------|----|----|------|-------|------|
| Q6YP21 | Kynurenine--oxoglutarate transaminase 3<br>OS=Homo sapiens<br>GN=CCBL2<br>PE=1 SV=1 - [KAT3_HUMAN]     | 28.85 | 2 | 12 | 12 | 28 | 0.880 | 0.829 | 0.814 | 1.066 | 58.44  | 28.85 | 17 | 28 | 454  | 51.4  | 8.19 |
| Q9Y265 | RuvB-like 1<br>OS=Homo sapiens<br>GN=RUVBL1<br>PE=1 SV=1 - [RUVBL1_HUMAN]                              | 45.83 | 1 | 18 | 18 | 57 | 1.060 | 1.208 | 1.083 | 1.066 | 140.84 | 45.83 | 29 | 57 | 456  | 50.2  | 6.42 |
| Q96124 | Far upstream element-binding protein 3<br>OS=Homo sapiens<br>GN=FUBP3<br>PE=1 SV=2 - [FUBP3_HUMAN]     | 44.93 | 1 | 19 | 20 | 92 | 0.900 | 1.063 | 0.958 | 1.066 | 211.89 | 44.93 | 33 | 92 | 572  | 61.6  | 8.38 |
| Q9Y3B7 | 39S ribosomal protein L11, mitochondrial<br>OS=Homo sapiens<br>GN=MRPL11<br>PE=1 SV=1 - [RM11_HUMAN]   | 50.00 | 1 | 9  | 9  | 37 | 0.962 | 1.225 | 1.028 | 1.066 | 97.77  | 50.00 | 13 | 37 | 192  | 20.7  | 9.91 |
| Q9UIJ7 | GTP:AMP phosphotransferase AK3, mitochondrial<br>OS=Homo sapiens<br>GN=AK3 PE=1 SV=4 - [KAD3_HUMAN]    | 67.40 | 1 | 17 | 17 | 94 | 1.347 | 1.056 | 1.113 | 1.066 | 203.86 | 67.40 | 29 | 94 | 227  | 25.5  | 9.16 |
| Q9C0C4 | Semaphorin-4C<br>OS=Homo sapiens<br>GN=SEMA4C<br>PE=1 SV=2 - [SEM4C_HUMAN]                             | 3.00  | 1 | 2  | 2  | 5  | 1.544 | 0.958 | 0.805 | 1.066 | 2.42   | 3.00  | 2  | 5  | 833  | 92.6  | 7.28 |
| Q9UKK3 | Poly [ADP-ribose] polymerase 4<br>OS=Homo sapiens<br>GN=PARP4<br>PE=1 SV=3 - [PARP4_HUMAN]             | 19.90 | 1 | 32 | 32 | 94 | 1.115 | 1.053 | 1.206 | 1.066 | 222.16 | 19.90 | 49 | 94 | 1724 | 192.5 | 5.66 |
| Q9NZ52 | ADP-ribosylation factor-binding protein GGA3<br>OS=Homo sapiens<br>GN=GGA3<br>PE=1 SV=1 - [GGA3_HUMAN] | 4.29  | 1 | 3  | 3  | 5  | 0.813 | 1.026 | 1.018 | 1.066 | 8.30   | 4.29  | 5  | 5  | 723  | 78.3  | 5.58 |
| Q15276 | Rab GTPase-binding effector protein 1<br>OS=Homo sapiens<br>GN=RABEP1<br>PE=1 SV=2 - [RABE1_HUMAN]     | 29.81 | 2 | 22 | 24 | 64 | 0.860 | 1.015 | 1.045 | 1.066 | 174.95 | 29.81 | 32 | 64 | 862  | 99.2  | 5.01 |

|        |                                                                                                                              |       |   |    |    |     |       |       |       |       |        |       |    |     |      |       |      |
|--------|------------------------------------------------------------------------------------------------------------------------------|-------|---|----|----|-----|-------|-------|-------|-------|--------|-------|----|-----|------|-------|------|
| P35914 | Hydroxymethylglutaryl-CoA lyase, mitochondrial<br>OS=Homo sapiens<br>GN=HMGCL<br>PE=1 SV=2 - [HMGCL_HUMAN]                   | 36.31 | 2 | 11 | 12 | 40  | 0.911 | 1.257 | 1.069 | 1.066 | 99.27  | 36.31 | 18 | 40  | 325  | 34.3  | 8.54 |
| P04150 | Glucocorticoid receptor<br>OS=Homo sapiens<br>GN=NR3C1<br>PE=1 SV=1 - [GCR_HUMAN]                                            | 10.30 | 1 | 6  | 6  | 9   | 0.964 | 1.585 | 1.007 | 1.066 | 25.51  | 10.30 | 6  | 9   | 777  | 85.6  | 6.38 |
| Q15435 | Protein phosphatase 1 regulatory subunit 7<br>OS=Homo sapiens<br>GN=PPP1R7<br>PE=1 SV=1 - [PP1R7_HUMAN]                      | 52.78 | 1 | 20 | 20 | 76  | 1.087 | 0.905 | 1.035 | 1.066 | 205.93 | 52.78 | 31 | 76  | 360  | 41.5  | 4.91 |
| Q5VSL9 | Striatin-interacting protein 1<br>OS=Homo sapiens<br>GN=STRIP1<br>PE=1 SV=1 - [STRP1_HUMAN]                                  | 11.11 | 1 | 6  | 7  | 13  | 1.112 | 0.789 | 0.970 | 1.067 | 24.30  | 11.11 | 9  | 13  | 837  | 95.5  | 6.29 |
| Q01970 | 1-phosphatidylinositol 4,5-bisphosphate phosphodiesterase beta-3<br>OS=Homo sapiens<br>GN=PLCB3<br>PE=1 SV=2 - [PLCB3_HUMAN] | 17.91 | 3 | 19 | 23 | 104 | 0.966 | 1.052 | 1.154 | 1.067 | 235.54 | 17.91 | 35 | 104 | 1234 | 138.7 | 5.90 |
| Q9Y2R9 | 28S ribosomal protein S7, mitochondrial<br>OS=Homo sapiens<br>GN=MRPS7<br>PE=1 SV=2 - [RTO7_HUMAN]                           | 34.30 | 1 | 6  | 7  | 34  | 0.801 | 1.067 | 1.216 | 1.067 | 108.11 | 34.30 | 11 | 34  | 242  | 28.1  | 9.99 |
| Q53EU6 | Glycerol-3-phosphate acyltransferase 3<br>OS=Homo sapiens<br>GN=AGPAT9<br>PE=1 SV=2 - [GPAT3_HUMAN]                          | 7.14  | 1 | 2  | 3  | 4   | 0.652 | 0.431 | 0.385 | 1.067 | 4.62   | 7.14  | 3  | 4   | 434  | 48.7  | 8.87 |
| Q99798 | Aconitate hydratase, mitochondrial<br>OS=Homo sapiens<br>GN=ACO2<br>PE=1 SV=2 - [ACON_HUMAN]                                 | 41.92 | 1 | 28 | 28 | 109 | 0.984 | 1.341 | 1.013 | 1.067 | 252.69 | 41.92 | 43 | 109 | 780  | 85.4  | 7.61 |

|        |                                                                                                              |       |   |    |    |    |       |       |       |       |        |       |    |    |     |      |       |
|--------|--------------------------------------------------------------------------------------------------------------|-------|---|----|----|----|-------|-------|-------|-------|--------|-------|----|----|-----|------|-------|
| P62847 | 40S ribosomal protein S24<br>OS=Homo sapiens<br>GN=RPS24<br>PE=1 SV=1 - [RS24_HUMAN]                         | 20.30 | 1 | 3  | 3  | 31 | 0.643 | 0.797 | 0.859 | 1.067 | 85.44  | 20.30 | 5  | 31 | 133 | 15.4 | 10.78 |
| Q8WUR7 | UPF0235 protein C15orf40<br>OS=Homo sapiens<br>GN=C15orf40<br>PE=1 SV=2 - [CO040_HUMAN]                      | 11.11 | 1 | 1  | 1  | 3  | 0.961 | 1.140 | 1.892 | 1.067 | 2.32   | 11.11 | 2  | 3  | 153 | 16.3 | 9.83  |
| P48506 | Glutamate--cysteine ligase catalytic subunit<br>OS=Homo sapiens<br>GN=GCLC PE=1 SV=2 - [GSHI_HUMAN]          | 25.12 | 1 | 12 | 13 | 43 | 1.908 | 1.041 | 1.132 | 1.067 | 107.67 | 25.12 | 23 | 43 | 637 | 72.7 | 6.09  |
| Q14956 | Transmembrane glycoprotein NMB<br>OS=Homo sapiens<br>GN=GPNMB<br>PE=1 SV=2 - [GPNMB_HUMAN]                   | 1.57  | 1 | 1  | 1  | 4  | 0.546 | 0.652 | 0.485 | 1.067 | 3.90   | 1.57  | 2  | 4  | 572 | 63.9 | 6.64  |
| Q9UN37 | Vacuolar protein sorting-associated protein 4A<br>OS=Homo sapiens<br>GN=VPS4A<br>PE=1 SV=1 - [VPS4A_HUMAN]   | 25.17 | 1 | 6  | 14 | 48 | 1.070 | 0.960 | 1.192 | 1.067 | 101.86 | 25.17 | 22 | 48 | 437 | 48.9 | 7.80  |
| P13378 | Homeobox protein Hox-D8<br>OS=Homo sapiens<br>GN=HOXD8<br>PE=2 SV=2 - [HXD8_HUMAN]                           | 5.17  | 1 | 1  | 1  | 2  | 0.982 | 1.038 | 0.797 | 1.067 | 4.84   | 5.17  | 1  | 2  | 290 | 31.9 | 8.50  |
| Q96EP5 | DAZ-associated protein 1<br>OS=Homo sapiens<br>GN=DAZP1<br>PE=1 SV=1 - [DAZP1_HUMAN]                         | 25.80 | 1 | 7  | 7  | 23 | 1.324 | 1.439 | 1.016 | 1.067 | 79.43  | 25.80 | 10 | 23 | 407 | 43.4 | 8.56  |
| O96019 | Actin-like protein 6A<br>OS=Homo sapiens<br>GN=ACTL6A<br>PE=1 SV=1 - [ACL6A_HUMAN]                           | 34.03 | 2 | 12 | 12 | 40 | 1.216 | 1.213 | 0.833 | 1.067 | 111.09 | 34.03 | 19 | 40 | 429 | 47.4 | 5.60  |
| O75832 | 26S proteasome non-ATPase regulatory subunit 10<br>OS=Homo sapiens<br>GN=PSMD10<br>PE=1 SV=1 - [PSD10_HUMAN] | 48.23 | 1 | 9  | 9  | 40 | 1.069 | 0.929 | 1.003 | 1.067 | 77.21  | 48.23 | 14 | 40 | 226 | 24.4 | 6.10  |

|        |                                                                                                            |       |   |    |    |     |       |       |       |       |        |       |    |     |     |      |      |
|--------|------------------------------------------------------------------------------------------------------------|-------|---|----|----|-----|-------|-------|-------|-------|--------|-------|----|-----|-----|------|------|
| Q15024 | Exosome complex component RRP42<br>OS=Homo sapiens<br>GN=EXOSC7<br>PE=1 SV=3 - [EXOS7_HUMAN]               | 23.02 | 1 | 5  | 5  | 8   | 1.137 | 1.215 | 1.090 | 1.068 | 17.82  | 23.02 | 7  | 8   | 291 | 31.8 | 5.19 |
| Q08257 | Quinone oxidoreductase<br>OS=Homo sapiens<br>GN=CRYZ<br>PE=1 SV=1 - [QOR_HUMAN]                            | 33.13 | 1 | 10 | 10 | 37  | 1.097 | 1.143 | 1.150 | 1.068 | 104.04 | 33.13 | 19 | 37  | 329 | 35.2 | 8.44 |
| Q96DB5 | Regulator of microtubule dynamics protein 1<br>OS=Homo sapiens<br>GN=RMDN1<br>PE=1 SV=1 - [RMD1_HUMAN]     | 25.48 | 1 | 7  | 8  | 27  | 1.211 | 1.263 | 0.893 | 1.068 | 69.80  | 25.48 | 12 | 27  | 314 | 35.8 | 8.50 |
| Q12905 | Interleukin enhancer-binding factor 2<br>OS=Homo sapiens<br>GN=ILF2 PE=1 SV=2 - [ILF2_HUMAN]               | 39.49 | 1 | 14 | 14 | 60  | 1.301 | 1.141 | 0.730 | 1.068 | 150.71 | 39.49 | 21 | 60  | 390 | 43.0 | 5.26 |
| Q15650 | Activating signal cointegrator 1<br>OS=Homo sapiens<br>GN=TRIP4<br>PE=1 SV=4 - [TRIP4_HUMAN]               | 12.56 | 1 | 6  | 7  | 15  | 1.378 | 1.107 | 1.177 | 1.068 | 37.32  | 12.56 | 10 | 15  | 581 | 66.1 | 7.85 |
| P20674 | Cytochrome c oxidase subunit 5A, mitochondrial<br>OS=Homo sapiens<br>GN=COX5A<br>PE=1 SV=2 - [COX5A_HUMAN] | 58.00 | 1 | 8  | 9  | 119 | 0.897 | 1.187 | 0.810 | 1.068 | 273.66 | 58.00 | 15 | 119 | 150 | 16.8 | 6.79 |
| Q96EB6 | NAD-dependent protein deacetylase sirtuin-1<br>OS=Homo sapiens<br>GN=SIRT1<br>PE=1 SV=2 - [SIRT1_HUMAN]    | 6.83  | 1 | 4  | 4  | 6   | 0.620 | 0.716 | 1.009 | 1.068 | 14.47  | 6.83  | 5  | 6   | 747 | 81.6 | 4.67 |
| Q9NRL3 | Striatin-4<br>OS=Homo sapiens<br>GN=STRN4<br>PE=1 SV=2 - [STRN4_HUMAN]                                     | 11.02 | 1 | 5  | 8  | 20  | 0.904 | 0.824 | 1.224 | 1.069 | 44.75  | 11.02 | 12 | 20  | 753 | 80.5 | 5.40 |

|        |                                                                                                                                                                                   |       |   |    |    |    |       |       |       |       |        |       |    |    |      |       |       |
|--------|-----------------------------------------------------------------------------------------------------------------------------------------------------------------------------------|-------|---|----|----|----|-------|-------|-------|-------|--------|-------|----|----|------|-------|-------|
| Q86UK0 | ATP-binding cassette sub-family A member 12<br>OS=Homo sapiens<br>GN=ABCA12<br>PE=1 SV=3 - [ABCAC_HUMAN]                                                                          | 1.97  | 2 | 2  | 7  | 15 | 1.089 | 0.958 | 1.093 | 1.069 | 28.25  | 1.97  | 8  | 15 | 2595 | 293.0 | 7.75  |
| Q969Q0 | 60S ribosomal protein L36a-like<br>OS=Homo sapiens<br>GN=RPL36AL<br>PE=1 SV=3 - [RL36L_HUMAN]                                                                                     | 40.57 | 1 | 1  | 7  | 29 | 1.301 | 1.394 | 0.981 | 1.069 | 63.59  | 40.57 | 13 | 29 | 106  | 12.5  | 10.65 |
| Q9UHU6 | Sedoheptulokinase<br>OS=Homo sapiens<br>GN=SHPK<br>PE=1 SV=3 - [SHPK_HUMAN]                                                                                                       | 12.55 | 1 | 5  | 5  | 11 | 0.838 | 1.034 | 1.033 | 1.069 | 27.70  | 12.55 | 7  | 11 | 478  | 51.5  | 6.83  |
| Q02880 | DNA topoisomerase 2-beta<br>OS=Homo sapiens<br>GN=TOP2B<br>PE=1 SV=3 - [TOP2B_HUMAN<br>Pseudouridine-5'-monophosphate<br>OS=Homo sapiens<br>GN=HDHD1<br>PE=1 SV=3 - [HDHD1_HUMAN] | 16.48 | 1 | 18 | 29 | 83 | 1.123 | 1.296 | 1.040 | 1.069 | 149.48 | 16.48 | 44 | 83 | 1626 | 183.2 | 8.00  |
| Q08623 | Transmembrane protein 263<br>OS=Homo sapiens<br>GN=TMEM263<br>PE=1 SV=1 - [TM263_HUMAN]                                                                                           | 27.63 | 1 | 5  | 5  | 13 | 1.165 | 1.208 | 1.003 | 1.069 | 35.13  | 27.63 | 6  | 13 | 228  | 25.2  | 5.31  |
| Q8WUH6 | Transforming growth factor-beta-induced protein ig-h3<br>OS=Homo sapiens<br>GN=TGFBI<br>PE=1 SV=1 - [BGH3_HUMAN]                                                                  | 12.93 | 1 | 1  | 1  | 6  | 0.799 | 0.964 | 1.250 | 1.069 | 16.33  | 12.93 | 2  | 6  | 116  | 11.7  | 9.32  |
| Q15582 | SWI/SNF-related matrix-associated actin-dependent regulator of chromatin subfamily D member 2<br>OS=Homo sapiens<br>GN=SMARCD2<br>PE=1 SV=3 - [SMRD2_HUMAN]                       | 33.82 | 1 | 20 | 20 | 43 | 0.738 | 2.974 | 1.400 | 1.069 | 85.92  | 33.82 | 28 | 43 | 683  | 74.6  | 7.71  |
| Q92925 | SWI/SNF-related matrix-associated actin-dependent regulator of chromatin subfamily D member 2<br>OS=Homo sapiens<br>GN=SMARCD2<br>PE=1 SV=3 - [SMRD2_HUMAN]                       | 10.17 | 2 | 3  | 5  | 15 | 1.053 | 1.299 | 1.391 | 1.069 | 44.04  | 10.17 | 9  | 15 | 531  | 58.9  | 9.64  |

|        |                                                                                                                    |       |   |    |    |     |       |       |       |       |        |       |    |     |      |       |      |
|--------|--------------------------------------------------------------------------------------------------------------------|-------|---|----|----|-----|-------|-------|-------|-------|--------|-------|----|-----|------|-------|------|
| Q86YM7 | Homer protein homolog 1<br>OS=Homo sapiens<br>GN=HOMER1<br>PE=1 SV=2 - [HOME1_HUMAN]                               | 7.63  | 1 | 2  | 3  | 5   | 0.737 | 0.663 | 0.802 | 1.069 | 11.94  | 7.63  | 4  | 5   | 354  | 40.3  | 5.44 |
| Q13009 | T-lymphoma invasion and metastasis-inducing protein 1<br>OS=Homo sapiens<br>GN=TIAM1<br>PE=1 SV=2 - [TIAM1_HUMAN]  | 0.69  | 1 | 1  | 1  | 3   | 1.171 |       | 1.279 | 1.070 | 9.48   | 0.69  | 1  | 3   | 1591 | 177.4 | 6.61 |
| Q96LW7 | Bd10-interacting CARD protein<br>OS=Homo sapiens<br>GN=C9orf89<br>PE=1 SV=1 - [BINCA_HUMAN]                        | 5.70  | 1 | 1  | 1  | 8   | 0.895 | 0.787 | 0.917 | 1.070 | 35.71  | 5.70  | 2  | 8   | 228  | 25.6  | 9.20 |
| P60228 | Eukaryotic translation initiation factor 3 subunit E<br>OS=Homo sapiens<br>GN=EIF3E<br>PE=1 SV=1 - [EIF3E_HUMAN]   | 40.67 | 1 | 18 | 18 | 78  | 0.913 | 0.939 | 0.860 | 1.070 | 167.72 | 40.67 | 28 | 78  | 445  | 52.2  | 6.04 |
| Q8NC51 | Plasminogen activator inhibitor 1 RNA-binding protein<br>OS=Homo sapiens<br>GN=SERBP1<br>PE=1 SV=2 - [PAIRB_HUMAN] | 42.65 | 1 | 24 | 24 | 156 | 1.136 | 1.474 | 0.969 | 1.070 | 379.82 | 42.65 | 36 | 156 | 408  | 44.9  | 8.65 |
| Q8IZ21 | Phosphatase and actin regulator 4<br>OS=Homo sapiens<br>GN=PHACTR4<br>PE=1 SV=1 - [PHAR4_HUMAN]                    | 1.85  | 1 | 1  | 1  | 2   | 1.307 | 0.994 | 1.092 | 1.070 | 5.71   | 1.85  | 2  | 2   | 702  | 78.2  | 6.62 |
| Q16656 | Nuclear respiratory factor 1<br>OS=Homo sapiens<br>GN=NRF1<br>PE=1 SV=1 - [NRF1_HUMAN]                             | 1.79  | 1 | 1  | 1  | 1   | 0.987 | 1.109 | 0.859 | 1.070 | 2.05   | 1.79  | 1  | 1   | 503  | 53.5  | 5.05 |
| Q04837 | Single-stranded DNA-binding protein, mitochondrial<br>OS=Homo sapiens<br>GN=SSBP1<br>PE=1 SV=1 - [SSBP_HUMAN]      | 40.54 | 1 | 5  | 5  | 24  | 1.007 | 1.663 | 1.056 | 1.070 | 65.39  | 40.54 | 9  | 24  | 148  | 17.2  | 9.60 |

|        |                                                                                                                                                      |       |   |    |    |    |       |       |       |       |        |       |    |    |      |       |       |
|--------|------------------------------------------------------------------------------------------------------------------------------------------------------|-------|---|----|----|----|-------|-------|-------|-------|--------|-------|----|----|------|-------|-------|
| P27338 | Amine oxidase<br>[flavin-<br>containing] B<br>OS=Homo<br>sapiens<br>GN=MAOB<br>PE=1 SV=3 -<br>[AOFB_HUMAN]                                           | 14.23 | 1 | 4  | 7  | 28 | 0.554 | 8.607 | 1.973 | 1.070 | 71.48  | 14.23 | 13 | 28 | 520  | 58.7  | 7.50  |
| Q13233 | Mitogen-<br>activated<br>protein kinase<br>kinase kinase 1<br>OS=Homo<br>sapiens<br>GN=MAP3K1<br>PE=1 SV=4 -<br>[M3K1_HUMAN]                         | 0.79  | 1 | 1  | 1  | 1  | 0.810 | 0.805 | 0.970 | 1.070 | 2.26   | 0.79  | 1  | 1  | 1512 | 164.4 | 7.74  |
| Q02388 | Collagen alpha-<br>1(VII) chain<br>OS=Homo<br>sapiens<br>GN=COL7A1<br>PE=1 SV=2 -<br>[CO7A1_HUMA<br>N]                                               | 13.49 | 1 | 27 | 28 | 58 | 1.590 | 0.985 | 0.888 | 1.071 | 152.69 | 13.49 | 41 | 58 | 2944 | 295.0 | 6.27  |
| P62899 | 60S ribosomal<br>protein L31<br>OS=Homo<br>sapiens<br>GN=RPL31<br>PE=1 SV=1 -<br>[RL31_HUMAN]                                                        | 34.40 | 1 | 6  | 6  | 56 | 0.921 | 1.047 | 0.990 | 1.071 | 146.34 | 34.40 | 9  | 56 | 125  | 14.5  | 10.54 |
| P31937 | 3-<br>hydroxyisobuty<br>rate<br>dehydrogenase<br>, mitochondrial<br>OS=Homo<br>sapiens<br>GN=HIBADH<br>PE=1 SV=2 -<br>[3HIDH_HUMAN<br>]              | 23.51 | 1 | 6  | 6  | 22 | 1.224 | 1.542 | 1.200 | 1.071 | 68.76  | 23.51 | 10 | 22 | 336  | 35.3  | 8.13  |
| P62266 | 40S ribosomal<br>protein S23<br>OS=Homo<br>sapiens<br>GN=RPS23<br>PE=1 SV=3 -<br>[RS23_HUMAN]                                                        | 56.64 | 2 | 12 | 12 | 70 | 0.954 | 1.099 | 0.949 | 1.071 | 170.88 | 56.64 | 18 | 70 | 143  | 15.8  | 10.49 |
| Q8N4Q0 | Zinc-binding<br>alcohol<br>dehydrogenase<br>domain-<br>containing<br>protein 2<br>OS=Homo<br>sapiens<br>GN=ZADH2<br>PE=1 SV=1 -<br>[ZADH2_HUMAN<br>] | 4.24  | 1 | 1  | 1  | 2  | 0.831 | 0.880 | 1.175 | 1.071 | 5.72   | 4.24  | 1  | 2  | 377  | 40.1  | 8.18  |
| Q9NPI1 | Bromodomain-<br>containing<br>protein 7<br>OS=Homo<br>sapiens<br>GN=BRD7<br>PE=1 SV=1 -<br>[BRD7_HUMAN]                                              | 2.61  | 1 | 1  | 1  | 4  | 1.238 | 1.674 |       | 1.071 | 11.66  | 2.61  | 2  | 4  | 651  | 74.1  | 6.39  |



|        |                                                                                                                       |       |   |    |    |     |       |       |       |       |        |       |    |     |     |      |      |
|--------|-----------------------------------------------------------------------------------------------------------------------|-------|---|----|----|-----|-------|-------|-------|-------|--------|-------|----|-----|-----|------|------|
| Q04828 | Aldo-keto reductase family 1 member C1<br>OS=Homo sapiens<br>GN=AKR1C1<br>PE=1 SV=1 - [AK1C1_HUMAN]                   | 73.68 | 3 | 3  | 20 | 253 | 1.035 | 0.501 | 0.709 | 1.071 | 576.49 | 73.68 | 31 | 253 | 323 | 36.8 | 7.88 |
| Q96G03 | Phosphoglucosyltransferase-2<br>OS=Homo sapiens<br>GN=PGM2<br>PE=1 SV=4 - [PGM2_HUMAN]                                | 30.88 | 1 | 17 | 18 | 60  | 1.000 | 1.297 | 0.954 | 1.071 | 125.16 | 30.88 | 29 | 60  | 612 | 68.2 | 6.73 |
| Q9HB21 | Pleckstrin homology domain-containing family A member 1<br>OS=Homo sapiens<br>GN=PLEKHA1<br>PE=1 SV=2 - [PKHA1_HUMAN] | 3.96  | 1 | 2  | 2  | 3   | 1.075 | 0.507 | 0.561 | 1.071 | 6.67   | 3.96  | 3  | 3   | 404 | 45.5 | 8.56 |
| Q9NWU5 | 39S ribosomal protein L22, mitochondrial<br>OS=Homo sapiens<br>GN=MRPL22<br>PE=1 SV=1 - [RM22_HUMAN]                  | 19.42 | 1 | 4  | 4  | 11  | 0.999 | 0.867 | 0.808 | 1.071 | 25.19  | 19.42 | 6  | 11  | 206 | 23.6 | 9.94 |
| Q9H0X9 | Oxysterol-binding protein-related protein 5<br>OS=Homo sapiens<br>GN=OSBP5<br>PE=1 SV=1 - [OSB5_HUMAN]                | 10.13 | 1 | 6  | 7  | 23  | 0.863 | 0.890 | 1.129 | 1.071 | 63.08  | 10.13 | 9  | 23  | 879 | 98.6 | 7.47 |
| P30281 | G1/S-specific cyclin-D3<br>OS=Homo sapiens<br>GN=CCND3<br>PE=1 SV=2 - [CCND3_HUMAN]                                   | 3.08  | 1 | 1  | 1  | 1   | 1.206 | 1.182 | 1.175 | 1.072 | 0.00   | 3.08  | 1  | 1   | 292 | 32.5 | 7.06 |
| Q96AM1 | Mas-related G-protein coupled receptor member F<br>OS=Homo sapiens<br>GN=MRGPRF<br>PE=2 SV=1 - [MRGRF_HUMA]           | 15.74 | 1 | 3  | 3  | 7   | 1.644 | 0.906 | 0.736 | 1.072 | 14.07  | 15.74 | 4  | 7   | 343 | 38.1 | 8.56 |
| P30419 | Glycopeptide N-tetradecanoyltransferase 1<br>OS=Homo sapiens<br>GN=NMT1<br>PE=1 SV=2 - [NMT1_HUMAN]                   | 25.81 | 2 | 10 | 12 | 69  | 1.093 | 0.982 | 0.978 | 1.072 | 196.20 | 25.81 | 22 | 69  | 496 | 56.8 | 7.80 |
| P99999 | Cytochrome c<br>OS=Homo sapiens<br>GN=CYCS<br>PE=1 SV=2 - [CYC_HUMAN]                                                 | 64.76 | 1 | 9  | 9  | 74  | 1.255 | 1.034 | 1.049 | 1.072 | 202.77 | 64.76 | 17 | 74  | 105 | 11.7 | 9.57 |

|        |                                                                                                                   |       |   |    |    |     |       |       |       |       |        |       |    |     |      |       |       |
|--------|-------------------------------------------------------------------------------------------------------------------|-------|---|----|----|-----|-------|-------|-------|-------|--------|-------|----|-----|------|-------|-------|
| Q92574 | Hamartin<br>OS=Homo sapiens<br>GN=TSC1<br>PE=1 SV=2 - [TSC1_HUMAN]                                                | 4.38  | 1 | 3  | 3  | 6   | 1.183 | 0.867 | 1.131 | 1.072 | 19.72  | 4.38  | 6  | 6   | 1164 | 129.7 | 6.47  |
| Q9NRR5 | Ubiquilin-4<br>OS=Homo sapiens<br>GN=UBQL4<br>PE=1 SV=2 - [UBQL4_HUMAN]                                           | 16.47 | 1 | 4  | 8  | 31  | 0.825 | 1.059 | 0.945 | 1.072 | 79.09  | 16.47 | 14 | 31  | 601  | 63.8  | 5.22  |
| P61353 | 60S ribosomal protein L27<br>OS=Homo sapiens<br>GN=RPL27<br>PE=1 SV=2 - [RPL27_HUMAN]                             | 58.82 | 1 | 11 | 12 | 76  | 0.937 | 1.091 | 1.038 | 1.072 | 156.10 | 58.82 | 18 | 76  | 136  | 15.8  | 10.56 |
| P05455 | Lupus La protein<br>OS=Homo sapiens<br>GN=SSB PE=1 SV=2 - [LA_HUMAN]                                              | 58.09 | 1 | 33 | 33 | 128 | 1.024 | 0.986 | 0.858 | 1.072 | 286.67 | 58.09 | 50 | 128 | 408  | 46.8  | 7.12  |
| Q9Y312 | Protein AAR2 homolog<br>OS=Homo sapiens<br>GN=AAR2<br>PE=1 SV=2 - [AAR2_HUMAN]                                    | 5.99  | 1 | 2  | 2  | 2   | 0.998 | 1.749 | 1.134 | 1.072 | 4.66   | 5.99  | 2  | 2   | 384  | 43.4  | 5.96  |
| Q5SRE7 | Phytanoyl-CoA dioxygenase domain-containing protein 1<br>OS=Homo sapiens<br>GN=PHYD1<br>PE=1 SV=2 - [PHYD1_HUMAN] | 29.21 | 1 | 7  | 7  | 17  | 1.159 | 1.293 | 0.743 | 1.072 | 45.19  | 29.21 | 9  | 17  | 291  | 32.4  | 6.32  |
| Q05655 | Protein kinase C delta type<br>OS=Homo sapiens<br>GN=PRKCD<br>PE=1 SV=2 - [KPCD_HUMAN]                            | 8.28  | 1 | 5  | 6  | 8   | 1.372 | 0.791 | 1.060 | 1.073 | 15.35  | 8.28  | 8  | 8   | 676  | 77.5  | 7.75  |
| Q9Y546 | Leucine-rich repeat-containing protein 42<br>OS=Homo sapiens<br>GN=LRR42<br>PE=1 SV=1 - [LRC42_HUMAN]             | 2.10  | 1 | 1  | 1  | 1   | 1.131 | 0.956 | 0.956 | 1.073 | 2.21   | 2.10  | 1  | 1   | 428  | 48.5  | 7.46  |
| Q9BTA9 | WW domain-containing adapter protein with coiled-coil<br>OS=Homo sapiens<br>GN=WAC PE=1 SV=3 - [WAC_HUMAN]        | 1.85  | 1 | 1  | 1  | 3   | 0.974 | 1.105 | 0.894 | 1.073 | 7.27   | 1.85  | 2  | 3   | 647  | 70.7  | 9.45  |

|        |                                                                                                                      |       |   |    |    |    |       |       |       |       |        |       |    |    |     |      |      |
|--------|----------------------------------------------------------------------------------------------------------------------|-------|---|----|----|----|-------|-------|-------|-------|--------|-------|----|----|-----|------|------|
| P82932 | 28S ribosomal protein S6, mitochondrial<br>OS=Homo sapiens<br>GN=MRPS6<br>PE=1 SV=3 - [RT06_HUMAN]                   | 34.40 | 1 | 6  | 6  | 24 | 0.833 | 0.937 | 0.733 | 1.073 | 53.45  | 34.40 | 9  | 24 | 125 | 14.2 | 9.26 |
| Q96T51 | RUN and FYVE domain-containing protein 1<br>OS=Homo sapiens<br>GN=RUFY1<br>PE=1 SV=2 - [RUFY1_HUMAN]                 | 25.99 | 1 | 19 | 20 | 58 | 0.976 | 1.306 | 1.162 | 1.073 | 111.90 | 25.99 | 31 | 58 | 708 | 79.8 | 5.74 |
| Q81YB7 | DIS3-like exonuclease 2<br>OS=Homo sapiens<br>GN=DIS3L2<br>PE=1 SV=4 - [DI3L2_HUMAN]                                 | 8.02  | 1 | 6  | 6  | 16 | 1.108 | 1.060 | 1.270 | 1.073 | 42.02  | 8.02  | 11 | 16 | 885 | 99.2 | 6.10 |
| Q6XE24 | RNA-binding motif, single-stranded-interacting protein 3<br>OS=Homo sapiens<br>GN=RBMS3<br>PE=1 SV=1 - [RBMS3_HUMAN] | 24.71 | 1 | 6  | 9  | 22 | 0.742 | 0.974 | 0.686 | 1.073 | 49.74  | 24.71 | 12 | 22 | 437 | 47.8 | 8.03 |
| Q96GC5 | 39S ribosomal protein L48, mitochondrial<br>OS=Homo sapiens<br>GN=MRPL48<br>PE=1 SV=2 - [RM48_HUMAN]                 | 16.98 | 1 | 3  | 3  | 14 | 0.964 | 1.393 | 0.871 | 1.073 | 42.72  | 16.98 | 6  | 14 | 212 | 23.9 | 8.98 |
| P18615 | Negative elongation factor E<br>OS=Homo sapiens<br>GN=NELFE<br>PE=1 SV=3 - [NELFE_HUMAN]                             | 18.95 | 1 | 5  | 6  | 19 | 0.933 | 1.145 | 1.144 | 1.073 | 42.78  | 18.95 | 9  | 19 | 380 | 43.2 | 9.33 |
| Q86UK7 | Zinc finger protein 598<br>OS=Homo sapiens<br>GN=ZNF598<br>PE=1 SV=1 - [ZNF598_HUMAN]                                | 10.95 | 1 | 9  | 9  | 20 | 1.032 | 0.859 | 0.914 | 1.073 | 59.87  | 10.95 | 14 | 20 | 904 | 98.6 | 8.40 |
| P34059 | N-acetylgalactosamine-6-sulfatase<br>OS=Homo sapiens<br>GN=GALNS<br>PE=1 SV=1 - [GALNS_HUMAN]                        | 14.37 | 1 | 8  | 8  | 36 | 1.233 | 1.310 | 0.998 | 1.074 | 90.01  | 14.37 | 10 | 36 | 522 | 58.0 | 6.74 |
| P14854 | Cytochrome c oxidase subunit 6B1<br>OS=Homo sapiens<br>GN=COX6B1<br>PE=1 SV=2 - [CX6B1_HUMAN]                        | 58.14 | 1 | 4  | 4  | 33 | 0.921 | 1.047 | 0.848 | 1.074 | 92.76  | 58.14 | 7  | 33 | 86  | 10.2 | 7.05 |

|        |                                                                                                                   |       |   |    |    |     |       |       |       |       |        |       |    |     |      |       |       |
|--------|-------------------------------------------------------------------------------------------------------------------|-------|---|----|----|-----|-------|-------|-------|-------|--------|-------|----|-----|------|-------|-------|
| Q7Z5Q1 | Cytoplasmic polyadenylation element-binding protein<br>2 OS=Homo sapiens<br>GN=CPEB2<br>PE=2 SV=3 - [CPEB2_HUMAN] | 4.41  | 1 | 2  | 2  | 6   | 0.926 | 1.430 | 1.419 | 1.074 | 14.41  | 4.41  | 4  | 6   | 589  | 64.9  | 7.21  |
| P62280 | 40S ribosomal protein S11<br>OS=Homo sapiens<br>GN=RPS11<br>PE=1 SV=3 - [RS11_HUMAN]                              | 54.43 | 1 | 16 | 16 | 74  | 0.800 | 1.031 | 0.938 | 1.074 | 162.66 | 54.43 | 26 | 74  | 158  | 18.4  | 10.30 |
| O14727 | Apoptotic protease-activating factor 1<br>OS=Homo sapiens<br>GN=APAF1<br>PE=1 SV=2 - [APAF_HUMAN]                 | 3.53  | 1 | 4  | 4  | 4   | 0.976 | 1.098 | 0.639 | 1.074 | 11.44  | 3.53  | 4  | 4   | 1248 | 141.7 | 6.40  |
| Q9NX20 | 39S ribosomal protein L16, mitochondrial<br>OS=Homo sapiens<br>GN=MRPL16<br>PE=1 SV=1 - [RM16_HUMAN]              | 18.33 | 1 | 4  | 4  | 10  | 1.093 | 1.376 | 0.824 | 1.074 | 20.04  | 18.33 | 7  | 10  | 251  | 28.4  | 10.13 |
| Q6NYC8 | Phostensin<br>OS=Homo sapiens<br>GN=PPP1R18<br>PE=1 SV=1 - [PPR18_HUMAN]                                          | 26.59 | 1 | 11 | 11 | 39  | 1.221 | 1.230 | 1.143 | 1.074 | 103.82 | 26.59 | 16 | 39  | 613  | 67.9  | 5.40  |
| Q96NC0 | Zinc finger matrin-type protein 2<br>OS=Homo sapiens<br>GN=ZMAT2<br>PE=1 SV=1 - [ZMAT2_HUMAN]                     | 6.53  | 1 | 2  | 2  | 3   | 1.050 | 1.423 | 0.965 | 1.074 | 1.71   | 6.53  | 2  | 3   | 199  | 23.6  | 9.01  |
| P62316 | Small nuclear ribonucleoprotein Sm D2<br>OS=Homo sapiens<br>GN=SNRPD2<br>PE=1 SV=1 - [SMD2_HUMAN]                 | 61.86 | 1 | 7  | 7  | 112 | 1.020 | 1.058 | 0.858 | 1.074 | 294.22 | 61.86 | 10 | 112 | 118  | 13.5  | 9.91  |
| Q9GZR2 | RNA exonuclease 4<br>OS=Homo sapiens<br>GN=REXO4<br>PE=1 SV=2 - [REXO4_HUMAN]                                     | 5.45  | 1 | 2  | 2  | 2   | 1.085 | 1.213 | 0.909 | 1.074 | 2.09   | 5.45  | 2  | 2   | 422  | 46.6  | 9.77  |
| P49915 | GMP synthase [glutamine-hydrolyzing]<br>OS=Homo sapiens<br>GN=GMPS<br>PE=1 SV=1 - [GUAA_HUMAN]                    | 26.41 | 1 | 17 | 17 | 48  | 1.028 | 1.030 | 1.019 | 1.074 | 120.88 | 26.41 | 25 | 48  | 693  | 76.7  | 6.87  |

|        |                                                                                                                  |       |   |    |    |      |       |       |       |       |         |       |    |      |      |       |       |
|--------|------------------------------------------------------------------------------------------------------------------|-------|---|----|----|------|-------|-------|-------|-------|---------|-------|----|------|------|-------|-------|
| Q9Y5Z4 | Heme-binding protein 2<br>OS=Homo sapiens<br>GN=HEBP2<br>PE=1 SV=1 - [HEBP2_HUMAN]                               | 30.24 | 1 | 6  | 6  | 59   | 1.185 | 0.981 | 0.937 | 1.074 | 169.70  | 30.24 | 11 | 59   | 205  | 22.9  | 4.63  |
| O14561 | Acyl carrier protein, mitochondrial<br>OS=Homo sapiens<br>GN=NDUFAB1<br>PE=1 SV=3 - [ACPM_HUMAN]                 | 15.38 | 1 | 3  | 3  | 22   | 1.212 | 1.188 | 0.734 | 1.074 | 36.21   | 15.38 | 5  | 22   | 156  | 17.4  | 4.93  |
| Q9NRZ7 | 1-acyl-sn-glycerol-3-phosphate acyltransferase gamma<br>OS=Homo sapiens<br>GN=AGPAT3<br>PE=1 SV=1 - [PLCC_HUMAN] | 19.68 | 1 | 7  | 7  | 25   | 1.199 | 0.771 | 0.820 | 1.074 | 64.39   | 19.68 | 10 | 25   | 376  | 43.4  | 8.72  |
| O75110 | Probable phospholipid-transporting ATPase IIA<br>OS=Homo sapiens<br>GN=ATP9A<br>PE=1 SV=3 - [ATP9A_HUMAN]        | 3.53  | 1 | 3  | 3  | 3    | 1.168 | 1.120 | 1.157 | 1.074 | 5.80    | 3.53  | 3  | 3    | 1047 | 118.5 | 7.77  |
| Q7Z5V6 | Protein phosphatase 1 regulatory subunit 32<br>OS=Homo sapiens<br>GN=PPP1R32<br>PE=1 SV=1 - [PPR32_HUMAN]        | 7.29  | 1 | 1  | 1  | 1    | 0.642 | 0.720 | 1.131 | 1.074 | 2.67    | 7.29  | 1  | 1    | 425  | 47.3  | 8.54  |
| P06753 | Tropomyosin alpha-3 chain<br>OS=Homo sapiens<br>GN=TPM3<br>PE=1 SV=2 - [TPM3_HUMAN]                              | 69.82 | 1 | 10 | 37 | 1043 | 1.456 | 0.958 | 1.265 | 1.074 | 2421.10 | 69.82 | 58 | 1043 | 285  | 32.9  | 4.72  |
| Q53FP2 | Transmembrane protein 35<br>OS=Homo sapiens<br>GN=TMEM35<br>PE=2 SV=2 - [TMM35_HUMAN]                            | 14.37 | 1 | 3  | 3  | 11   | 0.655 | 3.184 | 1.582 | 1.075 | 25.20   | 14.37 | 4  | 11   | 167  | 18.4  | 10.08 |
| Q3MIN7 | Ral guanine nucleotide dissociation stimulator-like 3<br>OS=Homo sapiens<br>GN=RGL3 PE=1 SV=2 - [RGL3_HUMAN]     | 2.68  | 1 | 1  | 1  | 6    | 1.146 | 1.120 | 1.193 | 1.075 | 9.60    | 2.68  | 1  | 6    | 710  | 78.0  | 7.68  |
| O15056 | Synaptotagmin-2<br>OS=Homo sapiens<br>GN=SYNJ2<br>PE=1 SV=3 - [SYNJ2_HUMAN]                                      | 3.14  | 1 | 4  | 4  | 9    | 1.069 | 1.650 | 1.128 | 1.075 | 18.77   | 3.14  | 5  | 9    | 1496 | 165.4 | 7.34  |

|        |                                                                                                                                                                                                                                                                                                                                                                                                                                                                                                                                                                                                                                                                                                                                                                                                                                                                                                                                                                                                                                              |       |   |    |    |    |       |       |       |       |        |       |    |    |     |      |      |
|--------|----------------------------------------------------------------------------------------------------------------------------------------------------------------------------------------------------------------------------------------------------------------------------------------------------------------------------------------------------------------------------------------------------------------------------------------------------------------------------------------------------------------------------------------------------------------------------------------------------------------------------------------------------------------------------------------------------------------------------------------------------------------------------------------------------------------------------------------------------------------------------------------------------------------------------------------------------------------------------------------------------------------------------------------------|-------|---|----|----|----|-------|-------|-------|-------|--------|-------|----|----|-----|------|------|
| O00217 | NADH<br>dehydrogenase<br>[ubiquinone]<br>iron-sulfur<br>protein 8,<br>mitochondrial<br>OS=Homo<br>sapiens<br>GN=NDUFS8<br>PE=1 SV=1 -<br>[NDUS8_HUMAN<br>]<br>GTP-binding<br>protein Di-Ras3<br>OS=Homo<br>sapiens<br>GN=DIRAS3<br>PE=1 SV=1 -<br>[DIRA3_HUMAN<br>]<br>Metalloendope<br>ptidase OMA1,<br>mitochondrial<br>OS=Homo<br>sapiens<br>GN=OMA1<br>PE=1 SV=1 -<br>[OMA1_HUMAN<br>]<br>TP53-<br>regulated<br>inhibitor of<br>apoptosis 1<br>OS=Homo<br>sapiens<br>GN=TRIA1<br>PE=1 SV=1 -<br>[TRIA1_HUMAN<br>]<br>Bisphosphoglyc<br>erate mutase<br>OS=Homo<br>sapiens<br>GN=BPGM<br>PE=1 SV=2 -<br>[PMGE_HUMAN]<br>NADH-<br>ubiquinone<br>oxidoreductase<br>75 kDa<br>subunit,<br>mitochondrial<br>OS=Homo<br>sapiens<br>GN=NDUFS1<br>PE=1 SV=3 -<br>[NDUS1_HUMAN<br>]<br>Calcium-binding<br>mitochondrial<br>carrier protein<br>SCaMC-2<br>OS=Homo<br>sapiens<br>GN=SLC25A25<br>PE=1 SV=1 -<br>[SCMC2_HUMA<br>N]<br>IgG receptor<br>FcRn large<br>subunit p51<br>OS=Homo<br>sapiens<br>GN=FCGRT<br>PE=1 SV=1 -<br>[FCGRN_HUMAN<br>] | 10.95 | 1 | 2  | 2  | 13 | 0.611 | 1.088 | 0.735 | 1.075 | 36.09  | 10.95 | 4  | 13 | 210 | 23.7 | 6.34 |
| O95661 |                                                                                                                                                                                                                                                                                                                                                                                                                                                                                                                                                                                                                                                                                                                                                                                                                                                                                                                                                                                                                                              | 3.06  | 1 | 1  | 1  | 2  | 1.050 | 0.763 | 0.706 | 1.075 | 1.62   | 3.06  | 1  | 2  | 229 | 25.8 | 9.39 |
| Q96E52 |                                                                                                                                                                                                                                                                                                                                                                                                                                                                                                                                                                                                                                                                                                                                                                                                                                                                                                                                                                                                                                              | 2.86  | 1 | 2  | 2  | 2  | 0.807 | 1.036 | 1.357 | 1.075 | 3.95   | 2.86  | 2  | 2  | 524 | 60.1 | 9.25 |
| O43715 |                                                                                                                                                                                                                                                                                                                                                                                                                                                                                                                                                                                                                                                                                                                                                                                                                                                                                                                                                                                                                                              | 44.74 | 1 | 3  | 3  | 8  | 0.706 | 1.248 | 0.996 | 1.075 | 28.89  | 44.74 | 5  | 8  | 76  | 8.8  | 5.48 |
| P07738 |                                                                                                                                                                                                                                                                                                                                                                                                                                                                                                                                                                                                                                                                                                                                                                                                                                                                                                                                                                                                                                              | 28.96 | 1 | 5  | 5  | 13 | 1.049 | 0.995 | 1.128 | 1.075 | 22.69  | 28.96 | 10 | 13 | 259 | 30.0 | 6.54 |
| P28331 |                                                                                                                                                                                                                                                                                                                                                                                                                                                                                                                                                                                                                                                                                                                                                                                                                                                                                                                                                                                                                                              | 37.41 | 1 | 21 | 21 | 46 | 0.612 | 0.966 | 0.835 | 1.075 | 134.84 | 37.41 | 31 | 46 | 727 | 79.4 | 6.23 |
| Q6KCM7 |                                                                                                                                                                                                                                                                                                                                                                                                                                                                                                                                                                                                                                                                                                                                                                                                                                                                                                                                                                                                                                              | 6.82  | 2 | 2  | 2  | 4  | 1.038 | 1.709 | 2.105 | 1.075 | 9.08   | 6.82  | 2  | 4  | 469 | 52.6 | 8.35 |
| P55899 |                                                                                                                                                                                                                                                                                                                                                                                                                                                                                                                                                                                                                                                                                                                                                                                                                                                                                                                                                                                                                                              | 16.16 | 1 | 5  | 5  | 7  | 1.135 | 1.052 | 0.924 | 1.075 | 11.08  | 16.16 | 7  | 7  | 365 | 39.7 | 6.54 |

|        |                                                                                                                                        |       |   |    |    |     |       |       |       |       |         |       |    |     |      |       |      |
|--------|----------------------------------------------------------------------------------------------------------------------------------------|-------|---|----|----|-----|-------|-------|-------|-------|---------|-------|----|-----|------|-------|------|
| Q15185 | Prostaglandin<br>E synthase 3<br>OS=Homo<br>sapiens<br>GN=PTGES3<br>PE=1 SV=1 -<br>[TEBP_HUMAN]                                        | 39.38 | 1 | 6  | 6  | 24  | 1.066 | 1.083 | 0.882 | 1.076 | 78.87   | 39.38 | 10 | 24  | 160  | 18.7  | 4.54 |
| O95155 | Ubiquitin<br>conjugation<br>factor E4 B<br>OS=Homo<br>sapiens<br>GN=UBE4B<br>PE=1 SV=1 -<br>[UBE4B_HUMAN<br>]                          | 12.67 | 1 | 14 | 15 | 51  | 0.740 | 0.912 | 1.122 | 1.076 | 117.38  | 12.67 | 22 | 51  | 1302 | 146.1 | 6.55 |
| P17252 | Protein kinase<br>C alpha type<br>OS=Homo<br>sapiens<br>GN=PRKCA<br>PE=1 SV=4 -<br>[KPCA_HUMAN]                                        | 19.49 | 1 | 14 | 17 | 49  | 1.087 | 0.693 | 0.602 | 1.076 | 106.13  | 19.49 | 26 | 49  | 672  | 76.7  | 7.05 |
| Q98VQ7 | Spermatogene<br>sis-associated<br>protein 5-like<br>protein 1<br>OS=Homo<br>sapiens<br>GN=SPATA5L1<br>PE=1 SV=2 -<br>[SPASL_HUMAN<br>] | 7.04  | 1 | 3  | 3  | 7   | 0.810 | 0.931 | 1.001 | 1.076 | 28.65   | 7.04  | 4  | 7   | 753  | 80.7  | 8.09 |
| Q14765 | Signal<br>transducer and<br>activator of<br>transcription 4<br>OS=Homo<br>sapiens<br>GN=STAT4<br>PE=1 SV=1 -<br>[STAT4_HUMAN<br>]      | 0.80  | 1 | 1  | 1  | 1   | 1.971 | 1.328 | 0.949 | 1.076 | 0.00    | 0.80  | 1  | 1   | 748  | 85.9  | 6.65 |
| O43583 | Density-<br>regulated<br>protein<br>OS=Homo<br>sapiens<br>GN=DENR<br>PE=1 SV=2 -<br>[DENR_HUMAN]                                       | 26.77 | 1 | 5  | 5  | 19  | 0.980 | 1.147 | 1.390 | 1.076 | 41.73   | 26.77 | 7  | 19  | 198  | 22.1  | 5.30 |
| P25490 | Transcriptional<br>repressor<br>protein YY1<br>OS=Homo<br>sapiens<br>GN=YY1 PE=1<br>SV=2 -<br>[TTY1_HUMAN]                             | 7.49  | 2 | 3  | 3  | 4   | 0.838 | 0.713 | 0.872 | 1.076 | 5.98    | 7.49  | 4  | 4   | 414  | 44.7  | 6.25 |
| Q06830 | Peroxisredoxin-1<br>OS=Homo<br>sapiens<br>GN=PRDX1<br>PE=1 SV=1 -<br>[PRDX1_HUMAN<br>]                                                 | 68.84 | 1 | 17 | 21 | 492 | 1.637 | 0.720 | 1.179 | 1.076 | 1056.96 | 68.84 | 35 | 492 | 199  | 22.1  | 8.13 |
| Q92785 | Zinc finger<br>protein ubi-d4<br>OS=Homo<br>sapiens<br>GN=DPF2<br>PE=1 SV=2 -<br>[REQU_HUMAN]                                          | 12.02 | 1 | 4  | 4  | 14  | 1.161 | 1.537 | 0.636 | 1.076 | 36.34   | 12.02 | 5  | 14  | 391  | 44.1  | 6.33 |

|        |                                                                                                                                                             |       |   |    |    |    |       |       |       |       |        |       |    |    |      |       |       |
|--------|-------------------------------------------------------------------------------------------------------------------------------------------------------------|-------|---|----|----|----|-------|-------|-------|-------|--------|-------|----|----|------|-------|-------|
| P26373 | 60S ribosomal protein L13<br>OS=Homo sapiens<br>GN=RPL13<br>PE=1 SV=4 - [RPL13_HUMAN]                                                                       | 40.28 | 1 | 10 | 10 | 73 | 0.767 | 1.079 | 0.945 | 1.076 | 151.97 | 40.28 | 16 | 73 | 211  | 24.2  | 11.65 |
| O96005 | Cleft lip and palate transmembrane protein 1<br>OS=Homo sapiens<br>GN=CLPTM1<br>PE=1 SV=1 - [CLPT1_HUMAN]                                                   | 11.51 | 1 | 7  | 7  | 30 | 1.393 | 0.780 | 0.842 | 1.076 | 70.57  | 11.51 | 12 | 30 | 669  | 76.0  | 6.30  |
| O95870 | Abhydrolase domain-containing protein 16A<br>OS=Homo sapiens<br>GN=ABHD16A<br>PE=1 SV=3 - [ABHGA_HUMAN]                                                     | 14.16 | 1 | 5  | 5  | 8  | 0.948 | 1.070 | 0.951 | 1.076 | 26.44  | 14.16 | 7  | 8  | 558  | 63.2  | 8.13  |
| P36957 | Dihydropyridine succinyltransferase component of 2-oxoglutarate dehydrogenase complex, mitochondrial<br>OS=Homo sapiens<br>GN=DLST PE=1 SV=4 - [ODO2_HUMAN] | 26.05 | 1 | 10 | 10 | 74 | 1.113 | 1.348 | 1.193 | 1.076 | 187.93 | 26.05 | 18 | 74 | 453  | 48.7  | 8.95  |
| Q13822 | Ectonucleotide pyrophosphatase/phosphodiesterase family member 2<br>OS=Homo sapiens<br>GN=ENPP2<br>PE=1 SV=3 - [ENPP2_HUMAN]                                | 0.81  | 1 | 1  | 1  | 1  | 0.720 | 1.104 | 0.668 | 1.077 | 1.78   | 0.81  | 1  | 1  | 863  | 98.9  | 7.37  |
| Q5SQS8 | Uncharacterized protein C10orf120<br>OS=Homo sapiens<br>GN=C10orf120<br>PE=2 SV=1 - [CJ120_HUMAN]                                                           | 3.58  | 1 | 1  | 1  | 1  | 0.133 | 0.895 | 1.883 | 1.077 | 2.56   | 3.58  | 1  | 1  | 335  | 39.2  | 9.44  |
| P49917 | DNA ligase 4<br>OS=Homo sapiens<br>GN=LIG4 PE=1 SV=2 - [DNL14_HUMAN]                                                                                        | 1.43  | 1 | 1  | 1  | 7  | 0.999 | 0.864 | 1.088 | 1.077 | 16.44  | 1.43  | 2  | 7  | 911  | 103.9 | 7.96  |
| Q8NFC6 | Biorientation of chromosomes in cell division protein 1-like 1<br>OS=Homo sapiens<br>GN=BOD1L1<br>PE=1 SV=2 - [BDL1_HUMAN]                                  | 3.47  | 1 | 8  | 11 | 24 | 1.133 | 1.337 | 0.931 | 1.077 | 40.95  | 3.47  | 15 | 24 | 3051 | 330.3 | 5.08  |



|        |                                                                                                                                            |       |   |    |    |    |       |       |       |       |       |       |    |    |      |       |      |
|--------|--------------------------------------------------------------------------------------------------------------------------------------------|-------|---|----|----|----|-------|-------|-------|-------|-------|-------|----|----|------|-------|------|
| O14647 | Chromodomain-helicase-DNA-binding protein<br>2 OS=Homo sapiens<br>GN=CHD2<br>PE=1 SV=2 - [CHD2_HUMAN]                                      | 3.56  | 1 | 2  | 4  | 5  | 1.173 | 1.240 | 0.958 | 1.077 | 10.52 | 3.56  | 5  | 5  | 1828 | 211.2 | 8.10 |
| Q5VZ66 | Janus kinase and microtubule-interacting protein 3 OS=Homo sapiens<br>GN=JAKMIP3<br>PE=2 SV=2 - [JKIP3_HUMAN]                              | 4.62  | 1 | 2  | 5  | 23 | 1.282 | 0.867 | 0.813 | 1.077 | 46.42 | 4.62  | 6  | 23 | 844  | 98.5  | 5.66 |
| P19174 | 1-phosphatidylinositol 4,5-bisphosphate phosphodiesterase gamma-1 OS=Homo sapiens<br>GN=PLCG1<br>PE=1 SV=1 - [PLCG1_HUMAN]                 | 14.73 | 1 | 17 | 18 | 36 | 0.955 | 1.017 | 1.145 | 1.077 | 82.95 | 14.73 | 25 | 36 | 1290 | 148.4 | 6.05 |
| P49116 | Nuclear receptor subfamily 2 group C member 2 OS=Homo sapiens<br>GN=NR2C2<br>PE=1 SV=1 - [NR2C2_HUMAN]                                     | 5.54  | 1 | 3  | 3  | 4  | 1.178 | 0.816 | 1.218 | 1.077 | 9.63  | 5.54  | 4  | 4  | 596  | 65.4  | 6.28 |
| P11172 | Uridine 5'-monophosphate synthase OS=Homo sapiens<br>GN=UMPS<br>PE=1 SV=1 - [UMPS_HUMAN]                                                   | 30.63 | 1 | 16 | 16 | 40 | 1.038 | 0.958 | 0.959 | 1.077 | 79.44 | 30.63 | 26 | 40 | 480  | 52.2  | 7.24 |
| O43924 | Retinal rod rhodopsin-sensitive cGMP 3',5'-cyclic phosphodiesterase subunit delta OS=Homo sapiens<br>GN=PDE6D<br>PE=1 SV=1 - [PDE6D_HUMAN] | 20.67 | 1 | 2  | 2  | 3  | 1.043 | 1.038 | 1.233 | 1.077 | 11.83 | 20.67 | 3  | 3  | 150  | 17.4  | 5.67 |
| Q9Y3C0 | WASH complex subunit CCDC53 OS=Homo sapiens<br>GN=CCDC53<br>PE=1 SV=1 - [CCDC53_HUMAN]                                                     | 3.61  | 1 | 1  | 1  | 1  | 0.793 | 1.349 | 1.227 | 1.077 | 0.00  | 3.61  | 1  | 1  | 194  | 21.2  | 4.46 |

|        |                                                                                                               |       |   |    |    |    |       |       |       |       |        |       |    |    |      |       |       |
|--------|---------------------------------------------------------------------------------------------------------------|-------|---|----|----|----|-------|-------|-------|-------|--------|-------|----|----|------|-------|-------|
| P36941 | Tumor necrosis factor receptor superfamily member 3<br>OS=Homo sapiens<br>GN=LTBR PE=1<br>SV=1 - [TNR3_HUMAN] | 6.21  | 1 | 2  | 2  | 5  | 0.938 | 0.778 | 1.047 | 1.078 | 13.01  | 6.21  | 3  | 5  | 435  | 46.7  | 5.83  |
| P49441 | Inositol polyphosphate 1-phosphatase<br>OS=Homo sapiens<br>GN=INPP1<br>PE=1 SV=1 - [INPP_HUMAN]               | 21.80 | 1 | 8  | 8  | 12 | 1.226 | 1.097 | 1.005 | 1.078 | 27.16  | 21.80 | 12 | 12 | 399  | 44.0  | 5.26  |
| P08651 | Nuclear factor 1 C-type<br>OS=Homo sapiens<br>GN=NFIC PE=1<br>SV=2 - [NFIC_HUMAN]                             | 12.20 | 1 | 4  | 5  | 13 | 0.897 | 2.302 | 1.167 | 1.078 | 30.04  | 12.20 | 8  | 13 | 508  | 55.6  | 8.38  |
| O00764 | Pyridoxal kinase<br>OS=Homo sapiens<br>GN=PDXK<br>PE=1 SV=1 - [PDXK_HUMAN]                                    | 31.09 | 1 | 8  | 8  | 37 | 0.881 | 1.006 | 0.841 | 1.078 | 74.90  | 31.09 | 14 | 37 | 312  | 35.1  | 6.13  |
| P09038 | Fibroblast growth factor 2<br>OS=Homo sapiens<br>GN=FGF2<br>PE=1 SV=3 - [FGF2_HUMAN]                          | 7.29  | 1 | 2  | 2  | 8  | 1.055 | 0.669 | 0.728 | 1.078 | 14.53  | 7.29  | 3  | 8  | 288  | 30.8  | 11.18 |
| Q8N183 | Mimitin, mitochondrial<br>OS=Homo sapiens<br>GN=NDUFAF2<br>PE=1 SV=1 - [MIMIT_HUMAN]                          | 41.42 | 1 | 7  | 7  | 12 | 0.951 | 0.964 | 0.790 | 1.078 | 26.73  | 41.42 | 8  | 12 | 169  | 19.8  | 8.97  |
| Q9Y295 | Developmentally-regulated GTP-binding protein 1<br>OS=Homo sapiens<br>GN=DRG1<br>PE=1 SV=1 - [DRG1_HUMAN]     | 35.42 | 1 | 11 | 11 | 44 | 0.949 | 0.926 | 1.009 | 1.078 | 122.78 | 35.42 | 19 | 44 | 367  | 40.5  | 8.90  |
| O75164 | Lysine-specific demethylase 4A<br>OS=Homo sapiens<br>GN=KDM4A<br>PE=1 SV=2 - [KDM4A_HUMAN]                    | 1.03  | 1 | 1  | 1  | 4  | 1.075 | 1.283 | 0.525 | 1.078 | 10.69  | 1.03  | 1  | 4  | 1064 | 120.6 | 5.85  |
| O15234 | Protein CASC3<br>OS=Homo sapiens<br>GN=CASC3<br>PE=1 SV=2 - [CASC3_HUMAN]                                     | 3.56  | 1 | 2  | 2  | 4  | 1.036 | 1.069 | 0.821 | 1.078 | 7.93   | 3.56  | 4  | 4  | 703  | 76.2  | 6.48  |

|        |                                                                                                                                                   |       |   |    |    |     |       |       |       |       |        |       |    |     |      |       |      |
|--------|---------------------------------------------------------------------------------------------------------------------------------------------------|-------|---|----|----|-----|-------|-------|-------|-------|--------|-------|----|-----|------|-------|------|
| A6ND91 | Putative L-aspartate dehydrogenase<br>OS=Homo sapiens<br>GN=ASPDH<br>PE=2 SV=2 - [ASPD_HUMAN]                                                     | 2.83  | 1 | 1  | 1  | 1   | 0.836 | 0.343 | 0.683 | 1.078 | 1.77   | 2.83  | 1  | 1   | 283  | 29.9  | 7.28 |
| P29692 | Elongation factor 1-delta<br>OS=Homo sapiens<br>GN=EEF1D<br>PE=1 SV=5 - [EF1D_HUMAN]                                                              | 63.70 | 1 | 14 | 18 | 267 | 0.884 | 1.039 | 1.073 | 1.078 | 631.62 | 63.70 | 29 | 267 | 281  | 31.1  | 5.01 |
| Q2TAZ0 | Autophagy-related protein 2 homolog A<br>OS=Homo sapiens<br>GN=ATG2A<br>PE=1 SV=3 - [ATG2A_HUMAN]                                                 | 1.19  | 1 | 2  | 2  | 3   | 1.325 | 1.608 | 1.478 | 1.078 | 1.93   | 1.19  | 2  | 3   | 1938 | 212.7 | 5.88 |
| P47897 | Glutamine--tRNA ligase<br>OS=Homo sapiens<br>GN=QARS<br>PE=1 SV=1 - [SYQ_HUMAN]                                                                   | 42.58 | 1 | 29 | 29 | 129 | 1.004 | 0.828 | 0.917 | 1.078 | 321.50 | 42.58 | 49 | 129 | 775  | 87.7  | 7.15 |
| Q8N684 | Cleavage and polyadenylation specificity factor subunit 7<br>OS=Homo sapiens<br>GN=CPSF7<br>PE=1 SV=1 - [CPSF7_HUMAN]                             | 19.96 | 1 | 7  | 7  | 16  | 1.200 | 1.136 | 1.115 | 1.078 | 46.62  | 19.96 | 11 | 16  | 471  | 52.0  | 8.00 |
| Q9UMX5 | Neudesin<br>OS=Homo sapiens<br>GN=NENF<br>PE=1 SV=1 - [NENF_HUMAN]                                                                                | 66.86 | 1 | 10 | 10 | 55  | 0.930 | 0.993 | 0.990 | 1.078 | 129.19 | 66.86 | 17 | 55  | 172  | 18.8  | 5.69 |
| Q7Z4H8 | KDEL motif-containing protein 2<br>OS=Homo sapiens<br>GN=KDEL2<br>PE=1 SV=2 - [KDEL2_HUMAN]                                                       | 36.69 | 1 | 15 | 15 | 42  | 1.322 | 0.800 | 0.714 | 1.079 | 117.66 | 36.69 | 22 | 42  | 507  | 58.5  | 8.24 |
| Q9NP73 | Putative bifunctional UDP-N-acetylglucosamine transferase and deubiquitinase<br>ALG13<br>OS=Homo sapiens<br>GN=ALG13<br>PE=1 SV=2 - [ALG13_HUMAN] | 4.13  | 1 | 3  | 3  | 3   | 1.242 | 1.751 | 2.327 | 1.079 | 2.90   | 4.13  | 3  | 3   | 1137 | 126.0 | 6.74 |

|        |                                                                                                                         |       |   |   |   |    |       |       |       |       |        |       |   |    |      |       |      |
|--------|-------------------------------------------------------------------------------------------------------------------------|-------|---|---|---|----|-------|-------|-------|-------|--------|-------|---|----|------|-------|------|
| Q86V88 | Magnesium-dependent phosphatase 1<br>OS=Homo sapiens<br>GN=MDP1<br>PE=1 SV=1 - [MGDP1_HUMAN]                            | 14.20 | 1 | 2 | 2 | 2  | 1.178 | 1.765 | 0.957 | 1.079 | 9.28   | 14.20 | 2 | 2  | 176  | 20.1  | 6.39 |
| Q96BI1 | Solute carrier family 22 member 18<br>OS=Homo sapiens<br>GN=SLC22A18<br>PE=1 SV=3 - [S22AI_HUMAN]                       | 5.90  | 1 | 3 | 3 | 9  | 1.268 | 0.716 | 0.870 | 1.079 | 23.14  | 5.90  | 5 | 9  | 424  | 44.8  | 9.57 |
| Q9BQP7 | Mitochondrial genome maintenance exonuclease 1<br>OS=Homo sapiens<br>GN=MGME1<br>PE=1 SV=1 - [MGME1_HUMAN]              | 3.49  | 1 | 1 | 1 | 2  | 0.667 | 1.666 | 1.633 | 1.079 | 7.12   | 3.49  | 1 | 2  | 344  | 39.4  | 7.68 |
| P51854 | Transketolase-like protein 1<br>OS=Homo sapiens<br>GN=TKTL1<br>PE=1 SV=2 - [TKTL1_HUMAN]                                | 3.52  | 1 | 1 | 3 | 6  | 0.860 | 0.682 | 0.645 | 1.079 | 7.16   | 3.52  | 4 | 6  | 596  | 65.3  | 5.86 |
| Q9Y5F3 | Protocadherin beta-1<br>OS=Homo sapiens<br>GN=PCDB1<br>PE=2 SV=2 - [PCDB1_HUMAN]                                        | 0.98  | 1 | 1 | 1 | 1  | 0.810 | 0.990 | 0.663 | 1.079 | 2.58   | 0.98  | 1 | 1  | 818  | 90.4  | 5.39 |
| Q13873 | Bone morphogenetic protein receptor type-2<br>OS=Homo sapiens<br>GN=BMPR2<br>PE=1 SV=2 - [BMPR2_HUMAN]                  | 1.83  | 1 | 2 | 2 | 4  | 1.060 | 1.177 | 1.173 | 1.079 | 4.44   | 1.83  | 3 | 4  | 1038 | 115.1 | 6.20 |
| O43570 | Carbonic anhydrase 12<br>OS=Homo sapiens<br>GN=CA12<br>PE=1 SV=1 - [CAH12_HUMAN]                                        | 2.54  | 1 | 1 | 1 | 1  | 1.219 | 2.139 | 0.943 | 1.079 | 0.00   | 2.54  | 1 | 1  | 354  | 39.4  | 7.23 |
| Q9H8Y5 | Ankyrin repeat and zinc finger domain-containing protein 1<br>OS=Homo sapiens<br>GN=ANKZF1<br>PE=1 SV=1 - [ANKZ1_HUMAN] | 8.40  | 1 | 6 | 6 | 8  | 0.949 | 1.205 | 1.080 | 1.080 | 12.26  | 8.40  | 7 | 8  | 726  | 80.9  | 8.41 |
| P35268 | 60S ribosomal protein L22<br>OS=Homo sapiens<br>GN=RPL22<br>PE=1 SV=2 - [RL22_HUMAN]                                    | 53.13 | 1 | 6 | 6 | 50 | 1.062 | 1.026 | 1.078 | 1.080 | 130.07 | 53.13 | 9 | 50 | 128  | 14.8  | 9.19 |

|        |                                                                                                          |       |   |    |    |    |       |       |       |       |        |       |    |    |      |       |       |
|--------|----------------------------------------------------------------------------------------------------------|-------|---|----|----|----|-------|-------|-------|-------|--------|-------|----|----|------|-------|-------|
| Q00987 | E3 ubiquitin-protein ligase<br>Mdm2<br>OS=Homo sapiens<br>GN=MDM2<br>PE=1 SV=1 - [MDM2_HUMAN]            | 5.30  | 1 | 2  | 2  | 10 | 0.631 | 0.733 | 1.159 | 1.080 | 0.00   | 5.30  | 2  | 10 | 491  | 55.2  | 4.69  |
| Q9UJV9 | Probable ATP-dependent RNA helicase<br>DDX41<br>OS=Homo sapiens<br>GN=DDX41<br>PE=1 SV=2 - [DDX41_HUMAN] | 4.02  | 1 | 2  | 3  | 5  | 0.610 | 0.793 | 0.822 | 1.080 | 12.50  | 4.02  | 3  | 5  | 622  | 69.8  | 6.84  |
| Q15907 | Ras-related protein Rab-11B<br>OS=Homo sapiens<br>GN=RAB11B<br>PE=1 SV=4 - [RB11B_HUMAN]                 | 56.88 | 2 | 2  | 12 | 57 | 0.929 | 0.819 | 0.919 | 1.080 | 122.88 | 56.88 | 19 | 57 | 218  | 24.5  | 5.94  |
| P35659 | Protein DEK<br>OS=Homo sapiens<br>GN=DEK PE=1 SV=1 - [DEK_HUMAN]                                         | 20.53 | 1 | 11 | 11 | 59 | 1.094 | 1.137 | 0.829 | 1.080 | 146.97 | 20.53 | 19 | 59 | 375  | 42.6  | 8.56  |
| Q7L014 | Probable ATP-dependent RNA helicase<br>DDX46<br>OS=Homo sapiens<br>GN=DDX46<br>PE=1 SV=2 - [DDX46_HUMAN] | 28.32 | 1 | 27 | 28 | 76 | 1.069 | 1.239 | 1.036 | 1.080 | 163.58 | 28.32 | 44 | 76 | 1031 | 117.3 | 9.29  |
| O75394 | 39S ribosomal protein L33, mitochondrial<br>OS=Homo sapiens<br>GN=MRPL33<br>PE=1 SV=1 - [RM33_HUMAN]     | 47.69 | 1 | 2  | 3  | 5  | 1.246 | 1.353 | 1.104 | 1.080 | 11.74  | 47.69 | 5  | 5  | 65   | 7.6   | 10.80 |
| Q96S55 | ATPase<br>WRNIP1<br>OS=Homo sapiens<br>GN=WRNIP1<br>PE=1 SV=2 - [WRIP1_HUMAN]                            | 4.51  | 1 | 3  | 3  | 8  | 1.226 | 1.093 | 0.936 | 1.080 | 12.35  | 4.51  | 5  | 8  | 665  | 72.1  | 6.10  |
| Q9H019 | Mitochondrial fission regulator 1-like<br>OS=Homo sapiens<br>GN=MTFR1L<br>PE=1 SV=2 - [MFR1L_HUMAN]      | 21.58 | 1 | 4  | 4  | 6  | 1.791 | 1.334 | 1.310 | 1.080 | 16.38  | 21.58 | 5  | 6  | 292  | 31.9  | 6.10  |
| Q8NI36 | WD repeat-containing protein 36<br>OS=Homo sapiens<br>GN=WDR36<br>PE=1 SV=1 - [WDR36_HUMAN]              | 6.10  | 1 | 6  | 6  | 22 | 1.012 | 0.938 | 1.137 | 1.081 | 46.14  | 6.10  | 9  | 22 | 951  | 105.3 | 7.53  |

|        |                                                                                                                                          |       |   |    |    |    |       |       |       |       |        |       |    |    |      |       |       |
|--------|------------------------------------------------------------------------------------------------------------------------------------------|-------|---|----|----|----|-------|-------|-------|-------|--------|-------|----|----|------|-------|-------|
| Q9BU23 | Lipase maturation factor 2<br>OS=Homo sapiens<br>GN=LMF2<br>PE=1 SV=2 - [LMF2_HUMAN]                                                     | 8.06  | 1 | 5  | 5  | 28 | 1.022 | 0.965 | 1.020 | 1.081 | 46.58  | 8.06  | 9  | 28 | 707  | 79.6  | 10.10 |
| Q96A33 | Coiled-coil domain-containing protein 47<br>OS=Homo sapiens<br>GN=CCDC47<br>PE=1 SV=1 - [CCDC47_HUMAN]                                   | 31.68 | 1 | 13 | 13 | 56 | 0.945 | 0.870 | 0.946 | 1.081 | 154.06 | 31.68 | 21 | 56 | 483  | 55.8  | 4.87  |
| Q99519 | Sialidase-1<br>OS=Homo sapiens<br>GN=NEU1<br>PE=1 SV=1 - [NEUR1_HUMAN]                                                                   | 14.22 | 1 | 3  | 3  | 5  | 1.693 | 0.656 | 0.789 | 1.081 | 18.03  | 14.22 | 4  | 5  | 415  | 45.4  | 5.88  |
| Q9ULT8 | E3 ubiquitin-protein ligase HECTD1<br>OS=Homo sapiens<br>GN=HECTD1<br>PE=1 SV=3 - [HECD1_HUMAN]                                          | 8.93  | 1 | 21 | 23 | 74 | 0.896 | 0.957 | 0.908 | 1.081 | 194.31 | 8.93  | 35 | 74 | 2610 | 289.2 | 5.35  |
| Q9NP88 | Glycerophosphocholine phosphodiesterase GPCPD1<br>OS=Homo sapiens<br>GN=GPCPD1<br>PE=1 SV=2 - [GPCP1_HUMAN]                              | 10.27 | 1 | 7  | 7  | 18 | 2.538 | 0.847 | 0.753 | 1.081 | 40.06  | 10.27 | 12 | 18 | 672  | 76.0  | 5.53  |
| Q9Y277 | Voltage-dependent anion-selective channel protein 3<br>OS=Homo sapiens<br>GN=VDAC3<br>PE=1 SV=1 - [VDAC3_HUMAN]                          | 49.47 | 1 | 10 | 12 | 74 | 1.537 | 1.136 | 0.674 | 1.081 | 170.98 | 49.47 | 17 | 74 | 283  | 30.6  | 8.66  |
| Q9NRN7 | L-aminoadipate-semialdehyde dehydrogenase-phosphopantetheinyl transferase<br>OS=Homo sapiens<br>GN=AASDHPPT<br>PE=1 SV=2 - [ADPPT_HUMAN] | 19.42 | 1 | 5  | 5  | 7  | 0.801 | 0.774 | 0.718 | 1.081 | 16.87  | 19.42 | 7  | 7  | 309  | 35.8  | 6.80  |
| Q9HC38 | Glyoxalase domain-containing protein 4<br>OS=Homo sapiens<br>GN=GLOD4<br>PE=1 SV=1 - [GLOD4_HUMAN]                                       | 37.38 | 1 | 13 | 13 | 48 | 1.292 | 1.132 | 1.108 | 1.081 | 111.62 | 37.38 | 20 | 48 | 313  | 34.8  | 5.60  |

|        |                                                                                                                                |       |   |    |    |    |       |       |       |       |        |       |    |    |     |      |      |
|--------|--------------------------------------------------------------------------------------------------------------------------------|-------|---|----|----|----|-------|-------|-------|-------|--------|-------|----|----|-----|------|------|
| Q9P2T1 | GMP reductase<br>2 OS=Homo sapiens<br>GN=GMPR2<br>PE=1 SV=1 - [GMPR2_HUMAN]                                                    | 10.06 | 1 | 2  | 5  | 15 | 1.146 | 0.862 | 1.060 | 1.081 | 26.58  | 10.06 | 8  | 15 | 348 | 37.9 | 7.23 |
| Q7L9L4 | MOB kinase activator 1B<br>OS=Homo sapiens<br>GN=MOB1B<br>PE=1 SV=3 - [MOB1B_HUMAN]                                            | 17.13 | 2 | 4  | 4  | 10 | 1.238 | 1.092 | 1.036 | 1.081 | 19.89  | 17.13 | 6  | 10 | 216 | 25.1 | 6.73 |
| O75531 | Barrier-to-autointegration factor<br>OS=Homo sapiens<br>GN=BANF1<br>PE=1 SV=1 - [BAF_HUMAN]                                    | 50.56 | 1 | 6  | 6  | 18 | 1.121 | 1.606 | 1.124 | 1.082 | 37.21  | 50.56 | 9  | 18 | 89  | 10.1 | 6.09 |
| P13073 | Cytochrome c oxidase subunit 4 isoform 1, mitochondrial<br>OS=Homo sapiens<br>GN=COX4I1<br>PE=1 SV=1 - [COX4I_HUMAN]           | 35.50 | 1 | 8  | 8  | 51 | 1.013 | 1.059 | 1.042 | 1.082 | 131.04 | 35.50 | 14 | 51 | 169 | 19.6 | 9.51 |
| Q9H490 | Phosphatidylinositol glycan anchor biosynthesis class U protein<br>OS=Homo sapiens<br>GN=PIGU PE=1 SV=3 - [PIGU_HUMAN]         | 6.21  | 1 | 2  | 2  | 3  | 0.849 | 0.659 | 0.719 | 1.082 | 8.98   | 6.21  | 3  | 3  | 435 | 50.0 | 7.72 |
| P85037 | Forkhead box protein K1<br>OS=Homo sapiens<br>GN=FOXK1<br>PE=1 SV=1 - [FOXK1_HUMAN]                                            | 17.19 | 1 | 10 | 11 | 25 | 0.860 | 1.186 | 1.149 | 1.082 | 53.96  | 17.19 | 16 | 25 | 733 | 75.4 | 9.32 |
| O95562 | Vesicle transport protein SFT2B<br>OS=Homo sapiens<br>GN=SFT2D2<br>PE=1 SV=1 - [SFT2B_HUMAN]                                   | 6.25  | 1 | 1  | 1  | 6  | 0.813 | 1.102 | 1.033 | 1.082 | 11.01  | 6.25  | 2  | 6  | 160 | 17.8 | 9.13 |
| Q58719 | Vesicle transport protein SFT2C<br>OS=Homo sapiens<br>GN=SFT2D3<br>PE=2 SV=1 - [SFT2C_HUMAN]                                   | 23.26 | 1 | 3  | 3  | 15 | 0.901 | 1.552 | 1.428 | 1.082 | 35.69  | 23.26 | 5  | 15 | 215 | 21.8 | 9.89 |
| Q9NP77 | RNA polymerase II subunit A C-terminal domain phosphatase<br>SSU72<br>OS=Homo sapiens<br>GN=SSU72<br>PE=1 SV=1 - [SSU72_HUMAN] | 22.16 | 1 | 4  | 4  | 7  | 1.172 | 1.137 | 1.125 | 1.082 | 19.41  | 22.16 | 6  | 7  | 194 | 22.6 | 5.33 |

|        |                                                                                                                                              |       |   |    |    |    |       |       |       |       |        |       |    |    |     |      |      |
|--------|----------------------------------------------------------------------------------------------------------------------------------------------|-------|---|----|----|----|-------|-------|-------|-------|--------|-------|----|----|-----|------|------|
| O75947 | ATP synthase subunit d, mitochondrial<br>OS=Homo sapiens<br>GN=ATP5H<br>PE=1 SV=3 - [ATP5H_HUMAN]                                            | 77.02 | 1 | 14 | 14 | 68 | 1.107 | 1.120 | 0.854 | 1.082 | 145.65 | 77.02 | 22 | 68 | 161 | 18.5 | 5.30 |
| P09110 | 3-ketoacyl-CoA thiolase, peroxisomal<br>OS=Homo sapiens<br>GN=ACAA1<br>PE=1 SV=2 - [THIK_HUMAN]                                              | 26.89 | 1 | 9  | 9  | 34 | 1.165 | 1.085 | 1.442 | 1.082 | 101.13 | 26.89 | 14 | 34 | 424 | 44.3 | 8.44 |
| P49069 | Calcium signal-modulating cyclophilin ligand<br>OS=Homo sapiens<br>GN=CAMLG<br>PE=1 SV=1 - [CAMLG_HUMAN]                                     | 22.64 | 1 | 5  | 5  | 16 | 0.981 | 0.941 | 1.253 | 1.082 | 41.64  | 22.64 | 7  | 16 | 296 | 32.9 | 8.05 |
| Q969V3 | Nicalin<br>OS=Homo sapiens<br>GN=NCLN PE=1 SV=2 - [NCLN_HUMAN]                                                                               | 35.35 | 1 | 17 | 17 | 73 | 0.934 | 0.775 | 0.824 | 1.082 | 185.07 | 35.35 | 30 | 73 | 563 | 62.9 | 6.89 |
| Q8TBF5 | Phosphatidylinositol-glycan biosynthesis class X protein<br>OS=Homo sapiens<br>GN=PIGX PE=2 SV=3 - [PIGX_HUMAN]                              | 3.49  | 1 | 1  | 1  | 3  | 1.099 | 0.955 | 0.739 | 1.082 | 5.44   | 3.49  | 2  | 3  | 258 | 28.8 | 6.33 |
| Q9BRJ2 | 39S ribosomal protein L45, mitochondrial<br>OS=Homo sapiens<br>GN=MRPL45<br>PE=1 SV=2 - [RM45_HUMAN]                                         | 12.75 | 3 | 4  | 5  | 17 | 0.981 | 1.240 | 0.918 | 1.082 | 21.77  | 12.75 | 7  | 17 | 306 | 35.3 | 9.03 |
| Q969Q6 | Serine/threonine-protein phosphatase 2A regulatory subunit B"<br>subunit gamma<br>OS=Homo sapiens<br>GN=PPP2R3C<br>PE=1 SV=1 - [P2R3C_HUMAN] | 3.09  | 2 | 2  | 2  | 4  | 0.936 | 0.761 | 0.768 | 1.082 | 6.84   | 3.09  | 2  | 4  | 453 | 53.3 | 5.19 |
| Q15003 | Condensin complex subunit 2<br>OS=Homo sapiens<br>GN=NCAPH<br>PE=1 SV=3 - [CND2_HUMAN]                                                       | 3.64  | 1 | 2  | 2  | 2  | 1.216 | 1.087 | 0.700 | 1.083 | 7.41   | 3.64  | 2  | 2  | 741 | 82.5 | 5.06 |



|        |                                                                                                                                                                                              |       |   |    |    |     |       |       |       |       |        |       |    |     |      |       |      |
|--------|----------------------------------------------------------------------------------------------------------------------------------------------------------------------------------------------|-------|---|----|----|-----|-------|-------|-------|-------|--------|-------|----|-----|------|-------|------|
| P11137 | Microtubule-associated protein 2<br>OS=Homo sapiens<br>GN=MAP2<br>PE=1 SV=4 - [MTAP2_HUMAN]<br>Methyltransferase-like protein 9<br>OS=Homo sapiens<br>GN=METTL9<br>PE=1 SV=1 - [METL9_HUMAN] | 6.68  | 1 | 11 | 11 | 25  | 0.981 | 1.058 | 0.871 | 1.083 | 41.91  | 6.68  | 18 | 25  | 1827 | 199.4 | 4.91 |
| Q9HIA3 | V-type proton ATPase subunit S1<br>OS=Homo sapiens<br>GN=ATP6AP1<br>PE=1 SV=2 - [VAS1_HUMAN]                                                                                                 | 4.09  | 1 | 1  | 1  | 2   | 1.119 | 0.732 | 0.924 | 1.083 | 3.87   | 4.09  | 2  | 2   | 318  | 36.5  | 7.36 |
| Q15904 | 3-ketoacyl-CoA thiolase, mitochondrial<br>OS=Homo sapiens<br>GN=ACAA2<br>PE=1 SV=2 - [THIM_HUMAN]                                                                                            | 5.96  | 1 | 2  | 2  | 8   | 0.930 | 0.868 | 1.031 | 1.083 | 17.43  | 5.96  | 4  | 8   | 470  | 52.0  | 6.14 |
| P42765 | E3 ubiquitin-protein ligase MARCH6<br>OS=Homo sapiens<br>GN=MARCH6<br>PE=1 SV=2 - [MARH6_HUMAN]                                                                                              | 53.65 | 2 | 22 | 22 | 228 | 1.034 | 1.050 | 1.069 | 1.083 | 637.82 | 53.65 | 35 | 228 | 397  | 41.9  | 8.09 |
| O60337 | E3 ubiquitin-protein ligase RNF146<br>OS=Homo sapiens<br>GN=RNF146<br>PE=1 SV=1 - [RNF146_HUMAN]                                                                                             | 0.99  | 1 | 1  | 1  | 3   | 1.007 | 0.590 | 1.064 | 1.083 | 4.78   | 0.99  | 2  | 3   | 910  | 102.5 | 6.28 |
| Q9NTX7 | Sorting nexin-5<br>OS=Homo sapiens<br>GN=SNX5<br>PE=1 SV=1 - [SNX5_HUMAN]                                                                                                                    | 5.29  | 1 | 2  | 2  | 5   | 0.831 | 1.010 | 0.947 | 1.083 | 13.80  | 5.29  | 2  | 5   | 359  | 38.9  | 5.33 |
| Q9Y5X3 | tRNA-splicing endonuclease subunit Sen54<br>OS=Homo sapiens<br>GN=TSN54<br>PE=1 SV=3 - [SEN54_HUMAN]                                                                                         | 40.10 | 1 | 16 | 18 | 56  | 1.160 | 0.988 | 0.880 | 1.083 | 131.29 | 40.10 | 28 | 56  | 404  | 46.8  | 6.76 |
| Q7Z6J9 | Glycoprotein-N-acetylgalactosamine 3-beta-galactosyltransferase 1<br>OS=Homo sapiens<br>GN=C1GALT1<br>PE=1 SV=1 - [C1GLT_HUMAN]                                                              | 1.90  | 1 | 1  | 1  | 4   | 0.729 | 1.199 | 1.110 | 1.083 | 6.13   | 1.90  | 2  | 4   | 526  | 58.8  | 7.91 |
| Q9NS00 |                                                                                                                                                                                              | 3.31  | 1 | 1  | 1  | 1   | 1.746 | 1.577 | 1.002 | 1.083 | 2.15   | 3.31  | 1  | 1   | 363  | 42.2  | 6.64 |

|        |                                                                                                                      |       |   |    |    |    |       |       |       |       |        |       |    |    |     |      |      |
|--------|----------------------------------------------------------------------------------------------------------------------|-------|---|----|----|----|-------|-------|-------|-------|--------|-------|----|----|-----|------|------|
| Q9Y230 | RuvB-like 2<br>OS=Homo sapiens<br>GN=RUVBL2<br>PE=1 SV=3 - [RUVB2_HUMAN]                                             | 55.08 | 1 | 25 | 25 | 89 | 0.886 | 1.086 | 0.935 | 1.083 | 221.28 | 55.08 | 39 | 89 | 463 | 51.1 | 5.64 |
| Q92995 | Ubiquitin carboxyl-terminal hydrolase 13<br>OS=Homo sapiens<br>GN=USP13<br>PE=1 SV=2 - [UBP13_HUMAN]                 | 4.75  | 1 | 3  | 3  | 4  | 0.528 | 1.566 | 1.098 | 1.083 | 5.86   | 4.75  | 4  | 4  | 863 | 97.3 | 5.53 |
| Q8TAG9 | Exocyst complex component 6<br>OS=Homo sapiens<br>GN=EXOC6<br>PE=1 SV=3 - [EXOC6_HUMAN]                              | 5.10  | 1 | 3  | 4  | 12 | 0.859 | 0.959 | 1.124 | 1.084 | 17.04  | 5.10  | 6  | 12 | 804 | 93.7 | 6.20 |
| Q3KQV9 | UDP-N-acetylhexosamine pyrophosphorylase-like protein<br>1 OS=Homo sapiens<br>GN=UAP1L1<br>PE=1 SV=2 - [UAP1L_HUMAN] | 9.07  | 1 | 4  | 4  | 13 | 1.223 | 1.189 | 1.360 | 1.084 | 18.84  | 9.07  | 8  | 13 | 507 | 57.0 | 6.32 |
| Q7Z422 | SUZ domain-containing protein 1<br>OS=Homo sapiens<br>GN=SZRD1<br>PE=1 SV=1 - [SZRD1_HUMAN]                          | 51.32 | 1 | 4  | 4  | 12 | 0.906 | 1.253 | 1.373 | 1.084 | 33.62  | 51.32 | 5  | 12 | 152 | 17.0 | 8.95 |
| Q9NQG6 | Mitochondrial dynamics protein MID51<br>OS=Homo sapiens<br>GN=MIEF1<br>PE=1 SV=1 - [MID51_HUMAN]                     | 4.32  | 1 | 2  | 2  | 2  | 1.174 | 0.778 | 0.896 | 1.084 | 0.00   | 4.32  | 2  | 2  | 463 | 51.3 | 7.64 |
| O43681 | ATPase ASNA1<br>OS=Homo sapiens<br>GN=ASNA1<br>PE=1 SV=2 - [ASNA_HUMAN]                                              | 22.99 | 1 | 6  | 6  | 57 | 0.993 | 1.130 | 1.015 | 1.084 | 176.91 | 22.99 | 10 | 57 | 348 | 38.8 | 4.91 |
| Q13163 | Dual specificity mitogen-activated protein kinase 5<br>OS=Homo sapiens<br>GN=MAP2K5<br>PE=1 SV=2 - [MP2K5_HUMAN]     | 2.68  | 1 | 1  | 1  | 2  | 1.203 | 0.886 | 1.223 | 1.084 | 0.00   | 2.68  | 1  | 2  | 448 | 50.1 | 6.39 |

|        |                                                                                                                         |       |   |    |    |     |       |       |       |       |        |       |    |     |     |       |      |
|--------|-------------------------------------------------------------------------------------------------------------------------|-------|---|----|----|-----|-------|-------|-------|-------|--------|-------|----|-----|-----|-------|------|
| Q9H4L4 | Sentrin-specific protease 3<br>OS=Homo sapiens<br>GN=SENP3<br>PE=1 SV=2 - [SENP3_HUMAN]                                 | 5.23  | 1 | 3  | 3  | 4   | 1.025 | 0.963 | 0.918 | 1.084 | 3.89   | 5.23  | 4  | 4   | 574 | 65.0  | 8.56 |
| Q8IXQ4 | GPALPP motifs-containing protein 1<br>OS=Homo sapiens<br>GN=GPALPP1<br>PE=1 SV=1 - [GPAM1_HUMAN]                        | 2.94  | 1 | 1  | 1  | 1   | 0.828 | 0.768 | 0.820 | 1.084 | 2.37   | 2.94  | 1  | 1   | 340 | 38.1  | 5.41 |
| P30491 | HLA class I histocompatibility antigen, B-53 alpha chain<br>OS=Homo sapiens<br>GN=HLA-B<br>PE=1 SV=1 - [1B53_HUMAN]     | 38.12 | 6 | 1  | 13 | 153 | 0.581 | 1.122 | 0.968 | 1.084 | 353.38 | 38.12 | 19 | 153 | 362 | 40.5  | 6.46 |
| P28838 | Cytosol aminopeptidase OS=Homo sapiens<br>GN=LAP3 PE=1 SV=3 - [AMPL_HUMAN]                                              | 59.73 | 1 | 30 | 30 | 171 | 1.773 | 1.035 | 1.023 | 1.084 | 459.81 | 59.73 | 49 | 171 | 519 | 56.1  | 7.93 |
| Q96HE7 | ERO1-like protein alpha<br>OS=Homo sapiens<br>GN=ERO1L<br>PE=1 SV=2 - [ERO1A_HUMAN]                                     | 42.31 | 1 | 15 | 17 | 108 | 1.076 | 0.853 | 0.756 | 1.085 | 278.19 | 42.31 | 27 | 108 | 468 | 54.4  | 5.68 |
| Q9H270 | Vacuolar protein sorting-associated protein 11 homolog<br>OS=Homo sapiens<br>GN=VPS11<br>PE=1 SV=1 - [VPS11_HUMAN]      | 10.73 | 1 | 9  | 10 | 27  | 0.907 | 0.846 | 0.925 | 1.085 | 51.81  | 10.73 | 15 | 27  | 941 | 107.8 | 7.05 |
| P50213 | Isocitrate dehydrogenase [NAD] subunit alpha, mitochondrial<br>OS=Homo sapiens<br>GN=IDH3A<br>PE=1 SV=1 - [IDH3A_HUMAN] | 33.88 | 1 | 14 | 14 | 51  | 1.186 | 1.054 | 0.953 | 1.085 | 115.99 | 33.88 | 20 | 51  | 366 | 39.6  | 6.92 |
| Q15554 | Telomeric repeat-binding factor 2<br>OS=Homo sapiens<br>GN=TERF2<br>PE=1 SV=3 - [TERF2_HUMAN]                           | 1.29  | 1 | 1  | 1  | 2   | 0.665 | 1.525 | 0.927 | 1.085 | 3.44   | 1.29  | 2  | 2   | 542 | 59.6  | 9.35 |
| Q6PML9 | Zinc transporter 9<br>OS=Homo sapiens<br>GN=SLC30A9<br>PE=1 SV=1 - [ZNT9_HUMAN]                                         | 14.26 | 1 | 7  | 7  | 15  | 1.130 | 1.137 | 1.157 | 1.085 | 33.39  | 14.26 | 9  | 15  | 568 | 63.5  | 8.32 |

|        |                                                                                                                                                 |       |   |    |    |     |       |       |       |       |        |       |    |     |      |       |       |
|--------|-------------------------------------------------------------------------------------------------------------------------------------------------|-------|---|----|----|-----|-------|-------|-------|-------|--------|-------|----|-----|------|-------|-------|
| Q9Y6D6 | Brefeldin A-<br>inhibited<br>guanine<br>nucleotide-<br>exchange<br>protein 1<br>OS=Homo<br>sapiens<br>GN=ARFGEF1<br>PE=1 SV=2 -<br>[BIG1_HUMAN] | 8.33  | 1 | 10 | 14 | 43  | 1.071 | 0.764 | 0.841 | 1.085 | 88.95  | 8.33  | 22 | 43  | 1849 | 208.6 | 5.85  |
| P32455 | Interferon-<br>induced<br>guanylate-<br>binding protein<br>1 OS=Homo<br>sapiens<br>GN=GBP1<br>PE=1 SV=2 -<br>[GBP1_HUMAN]                       | 43.75 | 2 | 27 | 33 | 184 | 1.490 | 0.866 | 1.017 | 1.085 | 435.72 | 43.75 | 52 | 184 | 592  | 67.9  | 6.32  |
| Q9UNP9 | Peptidyl-prolyl<br>cis-trans<br>isomerase E<br>OS=Homo<br>sapiens<br>GN=PPIE PE=1<br>SV=1 -<br>[PPIE_HUMAN]                                     | 19.60 | 1 | 3  | 4  | 5   | 0.841 | 1.129 | 1.236 | 1.085 | 13.93  | 19.60 | 5  | 5   | 301  | 33.4  | 5.60  |
| Q96JK2 | DDB1- and<br>CUL4-<br>associated<br>factor 5<br>OS=Homo<br>sapiens<br>GN=DCAF5<br>PE=1 SV=2 -<br>[DCAF5_HUMAN]                                  | 1.49  | 1 | 1  | 1  | 4   | 0.934 | 0.920 | 1.121 | 1.085 | 14.39  | 1.49  | 2  | 4   | 942  | 103.9 | 5.76  |
| O95236 | Apolipoprotein<br>L3 OS=Homo<br>sapiens<br>GN=APO L3<br>PE=2 SV=3 -<br>[APO L3_HUMAN<br>]                                                       | 2.74  | 1 | 1  | 1  | 4   | 1.006 | 0.648 | 1.034 | 1.085 | 10.90  | 2.74  | 2  | 4   | 402  | 44.3  | 8.16  |
| Q9Y520 | Protein<br>PRRC2C<br>OS=Homo<br>sapiens<br>GN=PRRC2C<br>PE=1 SV=4 -<br>[PRC2C_HUMAN]                                                            | 18.13 | 1 | 43 | 49 | 135 | 0.957 | 1.046 | 1.024 | 1.085 | 303.55 | 18.13 | 74 | 135 | 2896 | 316.7 | 9.13  |
| P49458 | Signal<br>recognition<br>particle 9 kDa<br>protein<br>OS=Homo<br>sapiens<br>GN=SRP9<br>PE=1 SV=2 -<br>[SRP09_HUMAN<br>]                         | 32.56 | 1 | 3  | 3  | 14  | 0.845 | 1.200 | 0.854 | 1.086 | 31.19  | 32.56 | 6  | 14  | 86   | 10.1  | 7.97  |
| Q15722 | Leukotriene B4<br>receptor 1<br>OS=Homo<br>sapiens<br>GN=LTB4R<br>PE=1 SV=2 -<br>[LT4R1_HUMAN<br>]                                              | 2.56  | 1 | 1  | 1  | 1   | 1.041 | 1.039 | 0.906 | 1.086 | 2.34   | 2.56  | 1  | 1   | 352  | 37.5  | 11.11 |
| Q01167 | Forkhead box<br>protein K2<br>OS=Homo<br>sapiens<br>GN=FOXK2<br>PE=1 SV=3 -<br>[FOXK2_HUMAN<br>N]                                               | 3.79  | 1 | 2  | 3  | 7   | 1.089 | 1.307 | 1.039 | 1.086 | 10.83  | 3.79  | 5  | 7   | 660  | 69.0  | 9.54  |

|        |                                                                                                                                                            |       |   |    |    |     |       |       |       |       |        |       |    |     |     |      |      |
|--------|------------------------------------------------------------------------------------------------------------------------------------------------------------|-------|---|----|----|-----|-------|-------|-------|-------|--------|-------|----|-----|-----|------|------|
| Q961G2 | F-box/LRR-repeat protein<br>20 OS=Homo sapiens<br>GN=FBXL20<br>PE=1 SV=2 - [FXL20_HUMAN]                                                                   | 3.21  | 1 | 1  | 2  | 2   | 1.240 | 1.163 | 1.641 | 1.086 | 4.58   | 3.21  | 2  | 2   | 436 | 48.4 | 7.49 |
| Q6UWU2 | Beta-galactosidase-1-like protein<br>OS=Homo sapiens<br>GN=GLB1L<br>PE=2 SV=1 - [GLB1L_HUMAN]                                                              | 3.67  | 1 | 1  | 3  | 5   | 0.732 | 0.418 | 0.414 | 1.086 | 12.08  | 3.67  | 3  | 5   | 654 | 74.1 | 8.92 |
| Q9BRQ8 | Apoptosis-inducing factor 2 OS=Homo sapiens<br>GN=AIFM2<br>PE=1 SV=1 - [AIFM2_HUMAN]                                                                       | 4.83  | 1 | 2  | 2  | 5   | 2.018 | 0.837 | 0.688 | 1.086 | 14.27  | 4.83  | 3  | 5   | 373 | 40.5 | 9.11 |
| Q8IU06 | E3 ubiquitin-protein ligase RNF135<br>OS=Homo sapiens<br>GN=RNF135<br>PE=1 SV=2 - [RNF135_HUMAN]                                                           | 6.94  | 1 | 1  | 2  | 2   | 0.981 | 0.797 | 1.169 | 1.086 | 5.17   | 6.94  | 2  | 2   | 432 | 47.9 | 6.81 |
| P14314 | Glucosidase 2 subunit beta<br>OS=Homo sapiens<br>GN=PRKCSH<br>PE=1 SV=2 - [GLU2B_HUMAN]                                                                    | 32.39 | 1 | 23 | 23 | 317 | 0.968 | 1.061 | 1.047 | 1.086 | 771.00 | 32.39 | 38 | 317 | 528 | 59.4 | 4.41 |
| Q86VY4 | Testis-specific Y-encoded-like protein 5<br>OS=Homo sapiens<br>GN=TSPYL5<br>PE=1 SV=2 - [TSYL5_HUMAN]                                                      | 8.15  | 1 | 3  | 3  | 7   | 0.731 | 1.258 | 1.618 | 1.086 | 13.89  | 8.15  | 4  | 7   | 417 | 45.1 | 9.54 |
| Q6STE5 | SWI/SNF-related matrix-associated actin-dependent regulator of chromatin subfamily D member 3<br>OS=Homo sapiens<br>GN=SMARCD3<br>PE=1 SV=1 - [SMRD3_HUMA] | 8.70  | 2 | 1  | 3  | 8   | 0.867 | 1.042 | 0.939 | 1.087 | 22.09  | 8.70  | 5  | 8   | 483 | 55.0 | 9.35 |
| Q969S3 | Zinc finger protein 622<br>OS=Homo sapiens<br>GN=ZNF622<br>PE=1 SV=1 - [ZNF622_HUMAN]                                                                      | 18.03 | 1 | 7  | 7  | 14  | 0.844 | 0.868 | 0.915 | 1.087 | 28.68  | 18.03 | 10 | 14  | 477 | 54.2 | 6.15 |

|        |                                                                                                                   |       |   |    |    |     |       |       |       |       |        |       |    |     |      |       |       |
|--------|-------------------------------------------------------------------------------------------------------------------|-------|---|----|----|-----|-------|-------|-------|-------|--------|-------|----|-----|------|-------|-------|
| Q6P2Q9 | Pre-mRNA-processing-splicing factor<br>8 OS=Homo sapiens<br>GN=PRPF8<br>PE=1 SV=2 - [PRP8_HUMAN]                  | 19.19 | 2 | 41 | 41 | 113 | 1.021 | 1.034 | 0.892 | 1.087 | 287.29 | 19.19 | 63 | 113 | 2335 | 273.4 | 8.84  |
| P22090 | 40S ribosomal protein S4, Y isoform 1<br>OS=Homo sapiens<br>GN=RPS4Y1<br>PE=1 SV=2 - [RS4Y1_HUMAN]                | 23.57 | 1 | 2  | 10 | 44  | 0.869 | 0.768 | 1.532 | 1.087 | 114.40 | 23.57 | 16 | 44  | 263  | 29.4  | 10.24 |
| Q6ICB4 | Sesquipedalian-2 OS=Homo sapiens<br>GN=FAM109B<br>PE=1 SV=1 - [SESQ2_HUMAN]                                       | 6.56  | 1 | 2  | 2  | 3   | 0.963 | 0.938 | 0.873 | 1.087 | 4.48   | 6.56  | 3  | 3   | 259  | 28.3  | 7.11  |
| Q86YS6 | Ras-related protein Rab-43<br>OS=Homo sapiens<br>GN=RAB43<br>PE=1 SV=1 - [RAB43_HUMAN]                            | 26.42 | 3 | 3  | 7  | 37  | 1.337 | 0.846 | 1.196 | 1.087 | 83.01  | 26.42 | 12 | 37  | 212  | 23.3  | 5.64  |
| P12259 | Coagulation factor V<br>OS=Homo sapiens GN=F5<br>PE=1 SV=4 - [FA5_HUMAN]                                          | 0.45  | 1 | 1  | 1  | 1   | 0.703 | 0.895 | 1.250 | 1.087 | 0.00   | 0.45  | 1  | 1   | 2224 | 251.5 | 6.05  |
| Q02978 | Mitochondrial 2-oxoglutarate/malate carrier protein<br>OS=Homo sapiens<br>GN=SLC25A11<br>PE=1 SV=3 - [M2OM_HUMAN] | 25.16 | 1 | 8  | 8  | 20  | 1.389 | 0.771 | 0.767 | 1.087 | 49.12  | 25.16 | 13 | 20  | 314  | 34.0  | 9.91  |
| Q9BVS4 | Serine/threonine-protein kinase RIO2<br>OS=Homo sapiens<br>GN=RIOK2<br>PE=1 SV=2 - [RIOK2_HUMAN]                  | 9.96  | 1 | 4  | 4  | 5   | 0.855 | 1.109 | 1.043 | 1.087 | 13.07  | 9.96  | 4  | 5   | 552  | 63.2  | 5.94  |
| Q96MF7 | E3 SUMO-protein ligase NSE2<br>OS=Homo sapiens<br>GN=NSMCE2<br>PE=1 SV=2 - [NSE2_HUMAN]                           | 12.15 | 1 | 3  | 3  | 3   | 1.026 | 0.564 | 0.932 | 1.087 | 6.50   | 12.15 | 3  | 3   | 247  | 27.9  | 7.74  |
| Q14997 | Proteasome activator complex subunit 4<br>OS=Homo sapiens<br>GN=PSME4<br>PE=1 SV=2 - [PSME4_HUMAN]                | 6.29  | 2 | 10 | 10 | 16  | 1.053 | 0.694 | 1.077 | 1.088 | 35.84  | 6.29  | 13 | 16  | 1843 | 211.2 | 6.90  |

|        |                                                                                                                                      |       |   |    |    |    |       |       |       |       |       |       |    |    |      |       |      |
|--------|--------------------------------------------------------------------------------------------------------------------------------------|-------|---|----|----|----|-------|-------|-------|-------|-------|-------|----|----|------|-------|------|
| Q9HCI5 | Melanoma-associated antigen E1<br>OS=Homo sapiens<br>GN=MAGEE1<br>PE=1 SV=2 - [MAGE1_HUMAN]                                          | 1.46  | 1 | 1  | 1  | 3  | 1.619 | 0.859 | 1.582 | 1.088 | 5.08  | 1.46  | 1  | 3  | 957  | 103.2 | 5.33 |
| Q8IVB5 | LIX1-like protein<br>OS=Homo sapiens<br>GN=LIX1L<br>PE=2 SV=1 - [LIX1L_HUMAN]                                                        | 13.35 | 1 | 3  | 3  | 18 | 1.388 | 1.068 | 1.301 | 1.088 | 27.13 | 13.35 | 6  | 18 | 337  | 36.5  | 8.56 |
| Q9Y250 | DNA-directed RNA polymerases I and III subunit RPAC2<br>OS=Homo sapiens<br>GN=POLR1D<br>PE=1 SV=1 - [RPAC2_HUMAN]                    | 18.80 | 1 | 2  | 2  | 7  | 0.938 | 0.809 | 0.720 | 1.088 | 19.00 | 18.80 | 4  | 7  | 133  | 15.2  | 5.80 |
| Q96FX7 | tRNA (adenine(58)-N(1))-methyltransferase catalytic subunit<br>TRMT61A<br>OS=Homo sapiens<br>GN=TRMT61A<br>PE=1 SV=1 - [TRM61_HUMAN] | 4.84  | 1 | 1  | 1  | 1  | 0.918 | 1.201 | 0.714 | 1.088 | 4.13  | 4.84  | 1  | 1  | 289  | 31.4  | 7.36 |
| Q5VVP1 | Spermatogenesis-associated protein 31A6<br>OS=Homo sapiens<br>GN=SPATA31A<br>6 PE=3 SV=1 - [S31A6_HUMAN]                             | 1.27  | 7 | 1  | 1  | 1  | 4.024 | 2.815 | 1.544 | 1.088 | 0.00  | 1.27  | 1  | 1  | 1343 | 147.7 | 8.70 |
| Q99735 | Microsomal glutathione S-transferase 2<br>OS=Homo sapiens<br>GN=MGST2<br>PE=1 SV=1 - [MGST2_HUMAN]                                   | 9.52  | 1 | 1  | 1  | 5  | 0.827 | 0.700 | 1.135 | 1.088 | 10.20 | 9.52  | 2  | 5  | 147  | 16.6  | 9.55 |
| Q6N069 | N-alpha-acetyltransferase 16, NatA auxiliary subunit<br>OS=Homo sapiens<br>GN=NAA16<br>PE=1 SV=2 - [NAA16_HUMAN]                     | 11.69 | 1 | 5  | 12 | 25 | 1.102 | 0.879 | 1.168 | 1.088 | 57.01 | 11.69 | 15 | 25 | 864  | 101.4 | 7.87 |
| Q9HAU4 | E3 ubiquitin-protein ligase SMURF2<br>OS=Homo sapiens<br>GN=SMURF2<br>PE=1 SV=1 - [SMUF2_HUMAN]                                      | 16.31 | 2 | 10 | 10 | 25 | 1.085 | 0.706 | 1.173 | 1.088 | 68.85 | 16.31 | 15 | 25 | 748  | 86.1  | 7.96 |

|        |                                                                                                                                                                                     |       |   |    |    |     |       |       |       |       |        |       |    |     |      |       |      |
|--------|-------------------------------------------------------------------------------------------------------------------------------------------------------------------------------------|-------|---|----|----|-----|-------|-------|-------|-------|--------|-------|----|-----|------|-------|------|
| Q9Y237 | Peptidyl-prolyl<br>cis-trans<br>isomerase<br>NIMA-<br>interacting 4<br>OS=Homo<br>sapiens<br>GN=PIM4 PE=1<br>SV=1 -<br>[PIM4_HUMAN]                                                 | 31.30 | 1 | 5  | 5  | 13  | 0.914 | 1.573 | 1.033 | 1.088 | 35.76  | 31.30 | 6  | 13  | 131  | 13.8  | 9.77 |
| Q96KP4 | Cytosolic non-<br>specific<br>dipeptidase<br>OS=Homo<br>sapiens<br>GN=CNDP2<br>PE=1 SV=2 -<br>[CNDP2_HUMAN<br>]<br>ADP-<br>ribosylation<br>factor-like<br>protein 6-<br>interacting | 46.95 | 1 | 19 | 19 | 100 | 1.198 | 0.868 | 0.779 | 1.088 | 231.50 | 46.95 | 29 | 100 | 475  | 52.8  | 5.97 |
| Q8N6S5 | protein 6<br>OS=Homo<br>sapiens<br>GN=ARL6IP6<br>PE=1 SV=1 -<br>[AR6P6_HUMAN<br>]<br>Neurexin-3-<br>beta                                                                            | 17.70 | 1 | 3  | 3  | 9   | 1.228 | 1.756 | 1.112 | 1.088 | 15.30  | 17.70 | 6  | 9   | 226  | 24.7  | 6.33 |
| Q9HDB5 | OS=Homo<br>sapiens<br>GN=NRX3<br>PE=1 SV=4 -<br>[NRX3B_HUMAN<br>]<br>Pleckstrin<br>homology<br>domain-<br>containing<br>family H                                                    | 4.71  | 2 | 1  | 1  | 1   | 0.739 | 0.630 | 1.688 | 1.088 | 2.05   | 4.71  | 1  | 1   | 637  | 69.3  | 7.21 |
| Q8IVE3 | member 2<br>OS=Homo<br>sapiens<br>GN=PLEKH2<br>PE=2 SV=2 -<br>[PKH2_HUMAN<br>]<br>Nucleosome<br>assembly<br>protein 1-like 4                                                        | 2.01  | 1 | 3  | 3  | 5   | 1.558 | 0.563 | 1.147 | 1.089 | 8.64   | 2.01  | 4  | 5   | 1493 | 168.1 | 7.56 |
| Q99733 | OS=Homo<br>sapiens<br>GN=NAP1L4<br>PE=1 SV=1 -<br>[NP1L4_HUMAN<br>]                                                                                                                 | 33.33 | 1 | 10 | 11 | 118 | 1.102 | 1.251 | 1.235 | 1.089 | 328.96 | 33.33 | 20 | 118 | 375  | 42.8  | 4.69 |
| Q9H2K0 | Translation<br>initiation factor<br>IF-3,<br>mitochondrial<br>OS=Homo<br>sapiens<br>GN=MTIF3<br>PE=1 SV=4 -<br>[IF3M_HUMAN]                                                         | 5.76  | 1 | 2  | 2  | 4   | 1.137 | 1.380 | 1.173 | 1.089 | 9.67   | 5.76  | 3  | 4   | 278  | 31.7  | 9.69 |
| Q92615 | La-related<br>protein 4B<br>OS=Homo<br>sapiens<br>GN=LARP4B<br>PE=1 SV=3 -<br>[LAR4B_HUMAN<br>]                                                                                     | 17.89 | 1 | 11 | 11 | 27  | 1.137 | 0.845 | 1.012 | 1.089 | 64.31  | 17.89 | 18 | 27  | 738  | 80.5  | 6.92 |



|        |                                                                                                                                                                                                           |       |   |    |    |    |       |       |       |       |        |       |    |    |     |       |      |
|--------|-----------------------------------------------------------------------------------------------------------------------------------------------------------------------------------------------------------|-------|---|----|----|----|-------|-------|-------|-------|--------|-------|----|----|-----|-------|------|
| Q92805 | Golgin<br>subfamily A<br>member 1<br>OS=Homo<br>sapiens<br>GN=GO LGA1<br>PE=1 SV=3 -<br>[GO GA1_HUMA<br>N]<br>Peptidyl-prolyl<br>dis-trans<br>isomerase<br>FKBP7                                          | 15.25 | 2 | 10 | 11 | 38 | 1.012 | 0.925 | 1.230 | 1.089 | 77.79  | 15.25 | 17 | 38 | 767 | 88.1  | 5.27 |
| Q9Y680 | OS=Homo<br>sapiens<br>GN=FKBP7<br>PE=1 SV=1 -<br>[FKBP7_HUMAN<br>]<br>Probable ATP-<br>dependent<br>RNA helicase<br>DDX58                                                                                 | 54.44 | 1 | 17 | 17 | 72 | 0.735 | 0.707 | 0.644 | 1.089 | 191.75 | 54.44 | 27 | 72 | 259 | 30.0  | 6.54 |
| O95786 | OS=Homo<br>sapiens<br>GN=DDX58<br>PE=1 SV=2 -<br>[DDX58_HUMAN<br>Coronin-2B<br>OS=Homo<br>sapiens<br>GN=CORO2B<br>PE=2 SV=4 -<br>[COR2B_HUMA<br>N]<br>Chondroitin<br>sulfate<br>glucuronyltrans<br>ferase | 9.19  | 2 | 8  | 8  | 24 | 3.576 | 1.058 | 1.306 | 1.089 | 54.14  | 9.19  | 12 | 24 | 925 | 106.5 | 6.40 |
| Q9UQ03 | OS=Homo<br>sapiens<br>GN=CHPF2<br>PE=2 SV=2 -<br>[CHPF2_HUMAN<br>]<br>H/ACA<br>ribonucleoprot<br>ein complex<br>subunit 4                                                                                 | 12.50 | 1 | 6  | 6  | 11 | 0.768 | 1.729 | 1.796 | 1.089 | 29.80  | 12.50 | 7  | 11 | 480 | 54.9  | 8.27 |
| Q9P2E5 | OS=Homo<br>sapiens<br>GN=DKC1<br>PE=1 SV=3 -<br>[DKC1_HUMAN]<br>Cytochrome b-<br>c1 complex<br>subunit Rieske,<br>mitochondrial                                                                           | 10.75 | 1 | 7  | 7  | 19 | 0.720 | 0.747 | 0.846 | 1.089 | 48.58  | 10.75 | 11 | 19 | 772 | 85.9  | 7.83 |
| O60832 | OS=Homo<br>sapiens<br>GN=UQCRFS1<br>PE=1 SV=2 -<br>[UCRI_HUMAN]<br>Myotubularin                                                                                                                           | 19.26 | 1 | 11 | 11 | 35 | 0.970 | 1.149 | 0.808 | 1.089 | 87.17  | 19.26 | 19 | 35 | 514 | 57.6  | 9.42 |
| P47985 | OS=Homo<br>sapiens<br>GN=MTM1<br>PE=1 SV=2 -<br>[MTM1_HUMAN<br>]<br>Epididymal<br>secretory<br>protein E3-<br>beta                                                                                        | 21.90 | 2 | 6  | 6  | 12 | 0.692 | 1.059 | 0.736 | 1.089 | 34.97  | 21.90 | 9  | 12 | 274 | 29.6  | 8.32 |
| Q13496 | OS=Homo<br>sapiens<br>GN=EDDM3B<br>PE=2 SV=2 -<br>[EP3B_HUMAN]                                                                                                                                            | 5.97  | 1 | 3  | 3  | 5  | 1.237 | 1.233 | 1.330 | 1.089 | 9.72   | 5.97  | 5  | 5  | 603 | 69.9  | 8.18 |
| P56851 | OS=Homo<br>sapiens<br>GN=EDDM3B<br>PE=2 SV=2 -<br>[EP3B_HUMAN]                                                                                                                                            | 4.08  | 1 | 1  | 1  | 1  | 1.069 | 0.697 | 0.800 | 1.089 | 2.04   | 4.08  | 1  | 1  | 147 | 17.6  | 6.99 |

|        |                                                                                                      |       |   |    |    |     |       |       |       |       |        |       |    |     |     |      |       |
|--------|------------------------------------------------------------------------------------------------------|-------|---|----|----|-----|-------|-------|-------|-------|--------|-------|----|-----|-----|------|-------|
| Q6ZUT6 | Uncharacterized protein<br>C15orf52<br>OS=Homo sapiens<br>GN=C15orf52<br>PE=1 SV=1 - [CO052_HUMAN]   | 11.42 | 1 | 6  | 6  | 12  | 1.359 | 2.570 | 2.798 | 1.089 | 20.48  | 11.42 | 8  | 12  | 534 | 57.3 | 9.13  |
| P53041 | Serine/threonine-phosphatase 5<br>OS=Homo sapiens<br>GN=PPP5C<br>PE=1 SV=1 - [PPP5_HUMAN]            | 29.26 | 2 | 16 | 16 | 48  | 1.016 | 0.843 | 0.944 | 1.089 | 110.43 | 29.26 | 24 | 48  | 499 | 56.8 | 6.28  |
| Q9Y3D3 | 28S ribosomal protein S16, mitochondrial<br>OS=Homo sapiens<br>GN=MRPS16<br>PE=1 SV=1 - [RT16_HUMAN] | 13.14 | 1 | 1  | 1  | 7   | 0.824 | 1.101 | 1.013 | 1.089 | 15.00  | 13.14 | 2  | 7   | 137 | 15.3 | 9.50  |
| Q8WVF1 | Protein OSCP1<br>OS=Homo sapiens<br>GN=OSCP1<br>PE=1 SV=4 - [OSCP1_HUMAN]                            | 4.88  | 1 | 2  | 2  | 3   | 0.997 | 0.895 | 1.068 | 1.089 | 6.23   | 4.88  | 3  | 3   | 389 | 44.6 | 5.83  |
| A5PLL7 | Transmembrane protein 189<br>OS=Homo sapiens<br>GN=TMEM189<br>PE=1 SV=3 - [TM189_HUMAN]              | 4.07  | 1 | 1  | 1  | 2   | 1.256 | 0.685 | 1.031 | 1.089 | 2.95   | 4.07  | 2  | 2   | 270 | 31.1 | 6.83  |
| Q99081 | Transcription factor 12<br>OS=Homo sapiens<br>GN=TCF12<br>PE=1 SV=1 - [HTF4_HUMAN]                   | 4.11  | 2 | 2  | 2  | 6   | 0.826 | 1.183 | 1.090 | 1.089 | 20.98  | 4.11  | 4  | 6   | 682 | 72.9 | 7.02  |
| P41227 | N-alpha-acetyltransferase 10<br>OS=Homo sapiens<br>GN=NAA10<br>PE=1 SV=1 - [NAA10_HUMAN]             | 45.11 | 1 | 7  | 9  | 25  | 0.853 | 1.103 | 1.219 | 1.090 | 76.92  | 45.11 | 13 | 25  | 235 | 26.4 | 5.64  |
| P46777 | 60S ribosomal protein L5<br>OS=Homo sapiens<br>GN=RPL5 PE=1 SV=3 - [RL5_HUMAN]                       | 39.06 | 1 | 19 | 20 | 137 | 0.994 | 1.191 | 1.009 | 1.090 | 340.81 | 39.06 | 33 | 137 | 297 | 34.3 | 9.72  |
| Q13247 | Serine/arginine-rich splicing factor 6<br>OS=Homo sapiens<br>GN=SRSF6<br>PE=1 SV=2 - [SRSF6_HUMAN]   | 24.42 | 1 | 7  | 11 | 59  | 0.885 | 1.119 | 0.959 | 1.090 | 112.45 | 24.42 | 18 | 59  | 344 | 39.6 | 11.43 |

|        |                                                                                                                                        |       |   |    |    |     |       |       |       |       |        |       |    |     |      |       |      |
|--------|----------------------------------------------------------------------------------------------------------------------------------------|-------|---|----|----|-----|-------|-------|-------|-------|--------|-------|----|-----|------|-------|------|
| Q93052 | Lipoma-preferred partner<br>OS=Homo sapiens<br>GN=LPP PE=1 SV=1 - [LPP_HUMAN]                                                          | 38.07 | 1 | 20 | 20 | 164 | 1.438 | 1.429 | 1.609 | 1.090 | 427.51 | 38.07 | 35 | 164 | 612  | 65.7  | 7.37 |
| Q14185 | Dedicator of cytokinesis protein 1<br>OS=Homo sapiens<br>GN=DOCK1 PE=1 SV=2 - [DOCK1_HUMAN]                                            | 15.39 | 1 | 25 | 28 | 59  | 1.181 | 1.025 | 0.923 | 1.090 | 128.51 | 15.39 | 39 | 59  | 1865 | 215.2 | 7.56 |
| Q96Q42 | Alsin OS=Homo sapiens<br>GN=ALS2 PE=1 SV=2 - [ALS2_HUMAN]                                                                              | 1.63  | 1 | 2  | 2  | 3   | 0.794 | 0.803 | 0.905 | 1.090 | 7.60   | 1.63  | 2  | 3   | 1657 | 183.5 | 6.27 |
| Q9YJK4 | HHIP-like protein 1<br>OS=Homo sapiens<br>GN=HHIPL1 PE=2 SV=2 - [HIPL1_HUMAN]                                                          | 1.41  | 1 | 1  | 1  | 2   | 1.503 | 0.227 | 0.445 | 1.090 | 4.92   | 1.41  | 1  | 2   | 782  | 86.7  | 7.58 |
| Q9Y4G8 | Rap guanine nucleotide exchange factor 2<br>OS=Homo sapiens<br>GN=RAPGEF2 PE=1 SV=1 - [RPGF2_HUMAN]                                    | 3.54  | 1 | 3  | 4  | 18  | 1.396 | 1.324 | 1.097 | 1.090 | 41.67  | 3.54  | 6  | 18  | 1499 | 167.3 | 6.67 |
| Q02224 | Centromere-associated protein E<br>OS=Homo sapiens<br>GN=CENPE PE=1 SV=2 - [CENPE_HUMAN]                                               | 6.52  | 3 | 10 | 19 | 34  | 1.194 | 1.376 | 0.915 | 1.090 | 46.16  | 6.52  | 20 | 34  | 2701 | 316.2 | 5.64 |
| O75390 | Citrate synthase, mitochondrial<br>OS=Homo sapiens<br>GN=CS PE=1 SV=2 - [CISY_HUMAN]                                                   | 28.54 | 1 | 13 | 13 | 77  | 1.168 | 1.489 | 1.129 | 1.091 | 195.50 | 28.54 | 20 | 77  | 466  | 51.7  | 8.32 |
| Q9ULH7 | MKL/myocardin-like protein 2<br>OS=Homo sapiens<br>GN=MKL2 PE=1 SV=3 - [MKL2_HUMAN]                                                    | 8.82  | 3 | 4  | 8  | 43  | 1.428 | 1.875 | 1.264 | 1.091 | 91.46  | 8.82  | 12 | 43  | 1088 | 118.1 | 6.28 |
| Q07666 | KH domain-containing, RNA-binding, signal transduction-associated protein 1<br>OS=Homo sapiens<br>GN=KHDRBS1 PE=1 SV=1 - [KHDR1_HUMAN] | 25.06 | 2 | 10 | 13 | 60  | 1.014 | 1.449 | 0.984 | 1.091 | 144.54 | 25.06 | 17 | 60  | 443  | 48.2  | 8.66 |



|        |                                                                                                                   |       |   |    |    |     |       |       |       |       |        |       |    |     |     |       |       |
|--------|-------------------------------------------------------------------------------------------------------------------|-------|---|----|----|-----|-------|-------|-------|-------|--------|-------|----|-----|-----|-------|-------|
| Q8IWA6 | Coiled-coil domain-containing protein 60<br>OS=Homo sapiens<br>GN=CCDC60<br>PE=2 SV=2 - [CCD60_HUMAN]             | 1.27  | 1 | 1  | 1  | 1   | 1.084 | 0.847 | 1.089 | 1.092 | 2.02   | 1.27  | 1  | 1   | 550 | 63.1  | 9.69  |
| Q8NEL9 | Phospholipase DDHD1<br>OS=Homo sapiens<br>GN=DDHD1<br>PE=1 SV=2 - [DDHD1_HUMAN]                                   | 4.44  | 1 | 3  | 5  | 6   | 0.609 | 0.825 | 1.108 | 1.092 | 11.25  | 4.44  | 5  | 6   | 900 | 100.4 | 5.67  |
| Q8TDD1 | ATP-dependent RNA helicase DDX54<br>OS=Homo sapiens<br>GN=DDX54<br>PE=1 SV=2 - [DDX54_HUMAN]                      | 12.03 | 2 | 7  | 9  | 24  | 0.664 | 0.851 | 0.610 | 1.092 | 36.02  | 12.03 | 12 | 24  | 881 | 98.5  | 10.02 |
| P51692 | Signal transducer and activator of transcription 5B<br>OS=Homo sapiens<br>GN=STAT5B<br>PE=1 SV=2 - [STAS5B_HUMAN] | 17.53 | 2 | 3  | 12 | 32  | 0.924 | 1.061 | 1.108 | 1.092 | 65.83  | 17.53 | 19 | 32  | 787 | 89.8  | 6.05  |
| Q9UI15 | Transgelin-3<br>OS=Homo sapiens<br>GN=TAGLN3<br>PE=1 SV=2 - [TAGL3_HUMAN]                                         | 18.09 | 1 | 2  | 3  | 79  | 1.330 | 1.787 | 1.077 | 1.092 | 193.07 | 18.09 | 5  | 79  | 199 | 22.5  | 7.33  |
| Q12899 | Tripartite motif-containing protein 26<br>OS=Homo sapiens<br>GN=TRIM26<br>PE=2 SV=1 - [TRI26_HUMAN]               | 14.10 | 1 | 6  | 6  | 14  | 1.095 | 1.024 | 1.420 | 1.092 | 36.52  | 14.10 | 9  | 14  | 539 | 62.1  | 5.03  |
| P62318 | Small nuclear ribonucleoprotein Sm D3<br>OS=Homo sapiens<br>GN=SNRPD3<br>PE=1 SV=1 - [SMD3_HUMAN]                 | 31.75 | 1 | 3  | 3  | 15  | 1.025 | 1.134 | 0.915 | 1.092 | 49.57  | 31.75 | 6  | 15  | 126 | 13.9  | 10.32 |
| O15523 | ATP-dependent RNA helicase DDX3Y<br>OS=Homo sapiens<br>GN=DDX3Y<br>PE=1 SV=2 - [DDX3Y_HUMAN]                      | 36.97 | 1 | 2  | 24 | 149 | 1.484 | 0.740 | 1.172 | 1.093 | 356.65 | 36.97 | 39 | 149 | 660 | 73.1  | 7.55  |
| O75475 | PC4 and SFRS1-interacting protein<br>OS=Homo sapiens<br>GN=PSIP1<br>PE=1 SV=1 - [PSIP1_HUMAN]                     | 25.47 | 1 | 14 | 15 | 44  | 1.286 | 2.069 | 0.986 | 1.093 | 94.85  | 25.47 | 25 | 44  | 530 | 60.1  | 9.13  |

|        |                                                                                                                                                            |       |   |    |    |     |       |       |       |       |        |       |    |     |      |      |       |
|--------|------------------------------------------------------------------------------------------------------------------------------------------------------------|-------|---|----|----|-----|-------|-------|-------|-------|--------|-------|----|-----|------|------|-------|
| Q8WU90 | Zinc finger<br>CCCH domain-<br>containing<br>protein 15<br>OS=Homo<br>sapiens<br>GN=ZC3H15<br>PE=1 SV=1 -<br>[ZC3HF_HUMAN<br>]                             | 28.17 | 1 | 11 | 11 | 40  | 0.733 | 1.122 | 0.950 | 1.093 | 106.04 | 28.17 | 15 | 40  | 426  | 48.6 | 5.31  |
| Q05932 | Folypolyglutam<br>ate synthase,<br>mitochondrial<br>OS=Homo<br>sapiens<br>GN=FPGS<br>PE=1 SV=3 -<br>[FOLC_HUMAN]                                           | 1.70  | 1 | 1  | 1  | 1   | 0.962 | 0.745 | 0.864 | 1.093 | 2.37   | 1.70  | 1  | 1   | 587  | 64.6 | 7.94  |
| P62314 | Small nuclea<br>ribonucleoprot<br>ein Sm D1<br>OS=Homo<br>sapiens<br>GN=SNRPD1<br>PE=1 SV=1 -<br>[SMD1_HUMAN]                                              | 27.73 | 1 | 3  | 3  | 14  | 0.842 | 0.891 | 0.925 | 1.093 | 30.64  | 27.73 | 4  | 14  | 119  | 13.3 | 11.56 |
| O75489 | NADH<br>dehydrogenase<br>[ubiquinone]<br>iron-sulfur<br>protein 3,<br>mitochondrial<br>OS=Homo<br>sapiens<br>GN=NDUFS3<br>PE=1 SV=1 -<br>[NDUS3_HUMAN<br>] | 33.71 | 1 | 9  | 9  | 27  | 0.683 | 1.037 | 0.894 | 1.093 | 60.21  | 33.71 | 13 | 27  | 264  | 30.2 | 7.50  |
| P55795 | Heterogeneous<br>nuclea<br>ribonucleoprot<br>ein H2<br>OS=Homo<br>sapiens<br>GN=HNRNPH2<br>PE=1 SV=1 -<br>[HNRH2_HUMAN<br>]                                | 43.65 | 1 | 6  | 14 | 138 | 1.161 | 1.284 | 1.283 | 1.093 | 451.88 | 43.65 | 22 | 138 | 449  | 49.2 | 6.30  |
| A0AV96 | RNA-binding<br>protein 47<br>OS=Homo<br>sapiens<br>GN=RBM47<br>PE=1 SV=2 -<br>[RBM47_HUMA<br>N]                                                            | 1.35  | 1 | 1  | 1  | 2   | 0.889 | 0.971 | 0.904 | 1.093 | 4.63   | 1.35  | 1  | 2   | 593  | 64.1 | 7.68  |
| Q9UL16 | Protein<br>CFAP45,<br>mitochondrial<br>OS=Homo<br>sapiens<br>GN=CFAP45<br>PE=2 SV=2 -<br>[CFA45_HUMAN<br>]                                                 | 5.81  | 2 | 3  | 4  | 5   | 1.090 | 1.447 | 1.093 | 10.95 | 5.81   | 4     | 5  | 551 | 65.7 | 8.90 |       |
| Q9BWM7 | Sideroflexin-3<br>OS=Homo<br>sapiens<br>GN=SFXN3<br>PE=1 SV=2 -<br>[SFXN3_HUMAN<br>]                                                                       | 33.54 | 1 | 8  | 9  | 42  | 1.320 | 1.101 | 1.098 | 1.094 | 97.52  | 33.54 | 15 | 42  | 325  | 36.0 | 9.09  |

|        |                                                                                                                |       |   |    |    |     |       |       |       |       |        |       |    |     |      |       |      |
|--------|----------------------------------------------------------------------------------------------------------------|-------|---|----|----|-----|-------|-------|-------|-------|--------|-------|----|-----|------|-------|------|
| Q9Y2D5 | A-kinase anchor protein 2 OS=Homo sapiens GN=AKAP2 PE=1 SV=3 - [AKAP2_HUMAN]                                   | 51.46 | 1 | 38 | 38 | 254 | 1.395 | 0.774 | 1.048 | 1.094 | 639.96 | 51.46 | 60 | 254 | 859  | 94.6  | 5.11 |
| O96018 | Amyloid beta A4 precursor protein-binding family A member 3 OS=Homo sapiens GN=APBA3 PE=1 SV=1 - [APBA3_HUMAN] | 5.74  | 1 | 1  | 1  | 1   | 2.674 | 1.228 | 1.651 | 1.094 | 2.23   | 5.74  | 1  | 1   | 575  | 61.4  | 4.94 |
| Q9H6Y2 | WD repeat-containing protein 55 OS=Homo sapiens GN=WDR55 PE=1 SV=2 - [WDR55_HUMAN]                             | 5.74  | 1 | 2  | 2  | 3   | 0.644 | 1.101 | 1.282 | 1.094 | 6.66   | 5.74  | 3  | 3   | 383  | 42.0  | 4.92 |
| Q92545 | Transmembrane protein 131 OS=Homo sapiens GN=TMEM131 PE=1 SV=3 - [TM131_HUMAN]                                 | 1.54  | 1 | 2  | 2  | 2   | 1.714 | 1.703 | 0.969 | 1.094 | 4.74   | 1.54  | 2  | 2   | 1883 | 205.0 | 8.59 |
| Q6ZW31 | Rho GTPase-activating protein SYDE1 OS=Homo sapiens GN=SYDE1 PE=1 SV=1 - [SYDE1_HUMAN]                         | 4.08  | 1 | 3  | 3  | 4   | 0.942 | 1.059 | 1.058 | 1.094 | 6.64   | 4.08  | 4  | 4   | 735  | 79.7  | 8.43 |
| O75477 | Erlin-1 OS=Homo sapiens GN=ERLIN1 PE=1 SV=1 - [ERLIN1_HUMAN]                                                   | 37.86 | 1 | 9  | 16 | 84  | 1.032 | 0.969 | 0.768 | 1.094 | 188.07 | 37.86 | 28 | 84  | 346  | 38.9  | 7.87 |
| Q9UKD2 | mRNA turnover protein 4 homolog OS=Homo sapiens GN=MRT04 PE=1 SV=2 - [MRT4_HUMAN]                              | 29.29 | 1 | 6  | 6  | 16  | 0.722 | 0.670 | 0.656 | 1.094 | 10.46  | 29.29 | 11 | 16  | 239  | 27.5  | 8.29 |
| Q01740 | Dimethylaniline monooxygenase [N-oxide-forming] 1 OS=Homo sapiens GN=FMO1 PE=2 SV=3 - [FMO1_HUMAN]             | 1.13  | 1 | 1  | 1  | 1   | 0.588 | 1.123 | 1.083 | 1.094 | 2.69   | 1.13  | 1  | 1   | 532  | 60.3  | 7.20 |
| P55854 | Small ubiquitin-related modifier 3 OS=Homo sapiens GN=SUMO3 PE=1 SV=2 - [SUMO3_HUMAN]                          | 24.27 | 1 | 2  | 3  | 29  | 1.487 | 1.576 | 1.090 | 1.094 | 57.95  | 24.27 | 5  | 29  | 103  | 11.6  | 5.49 |

|        |                                                                                                                         |       |   |    |    |     |       |       |       |       |        |       |    |     |      |       |       |
|--------|-------------------------------------------------------------------------------------------------------------------------|-------|---|----|----|-----|-------|-------|-------|-------|--------|-------|----|-----|------|-------|-------|
| Q9Y3E1 | Hepatoma-derived growth factor-related protein 3<br>OS=Homo sapiens<br>GN=HDGFRP3<br>PE=1 SV=1 - [HDGR3_HUMAN]          | 27.59 | 1 | 4  | 5  | 13  | 1.040 | 1.153 | 1.017 | 1.094 | 29.02  | 27.59 | 8  | 13  | 203  | 22.6  | 7.99  |
| Q13601 | KRR1 small subunit processome component homolog<br>OS=Homo sapiens<br>GN=KRR1<br>PE=1 SV=4 - [KRR1_HUMAN]               | 13.91 | 1 | 5  | 5  | 11  | 0.973 | 0.890 | 0.758 | 1.094 | 18.12  | 13.91 | 8  | 11  | 381  | 43.6  | 9.77  |
| Q9UHB9 | Signal recognition particle subunit SRP68<br>OS=Homo sapiens<br>GN=SRP68<br>PE=1 SV=2 - [SRP68_HUMAN]                   | 40.67 | 1 | 25 | 25 | 104 | 0.830 | 0.912 | 0.957 | 1.094 | 256.86 | 40.67 | 40 | 104 | 627  | 70.7  | 8.56  |
| Q16254 | Transcription factor E2F4<br>OS=Homo sapiens<br>GN=E2F4<br>PE=1 SV=2 - [E2F4_HUMAN]                                     | 2.18  | 1 | 1  | 1  | 2   | 0.742 | 0.649 | 1.030 | 1.094 | 4.16   | 2.18  | 1  | 2   | 413  | 43.9  | 4.75  |
| Q8ND82 | Zinc finger protein 280C<br>OS=Homo sapiens<br>GN=ZNF280C<br>PE=1 SV=1 - [Z280C_HUMAN]                                  | 1.90  | 1 | 1  | 1  | 1   | 0.934 | 1.033 | 0.895 | 1.094 | 0.00   | 1.90  | 1  | 1   | 737  | 83.0  | 9.11  |
| Q9Y399 | 28S ribosomal protein S2, mitochondrial<br>OS=Homo sapiens<br>GN=MRPS2<br>PE=1 SV=1 - [RTO2_HUMAN]                      | 14.19 | 1 | 5  | 5  | 14  | 0.707 | 0.768 | 1.001 | 1.094 | 37.77  | 14.19 | 6  | 14  | 296  | 33.2  | 9.26  |
| Q8IYB3 | Serine/arginine repetitive matrix protein 1<br>OS=Homo sapiens<br>GN=SRRM1<br>PE=1 SV=2 - [SRRM1_HUMAN]                 | 14.71 | 1 | 8  | 10 | 55  | 1.137 | 1.339 | 0.912 | 1.094 | 89.05  | 14.71 | 14 | 55  | 904  | 102.3 | 11.84 |
| Q13936 | Voltage-dependent L-type calcium channel subunit alpha-1C<br>OS=Homo sapiens<br>GN=CACNA1C<br>PE=1 SV=4 - [CAC1C_HUMAN] | 1.67  | 2 | 3  | 3  | 4   | 0.832 | 1.119 | 3.857 | 1.095 | 9.93   | 1.67  | 3  | 4   | 2221 | 248.8 | 6.76  |



|        |                                                                                                                                 |       |   |    |    |    |       |       |       |       |        |       |    |    |      |       |      |
|--------|---------------------------------------------------------------------------------------------------------------------------------|-------|---|----|----|----|-------|-------|-------|-------|--------|-------|----|----|------|-------|------|
| Q92688 | Addic leucine-rich nuclear phosphoprotein 32 family member B<br>OS=Homo sapiens<br>GN=ANP32B<br>PE=1 SV=1 - [AN32B_HUMAN]       | 29.48 | 2 | 4  | 10 | 49 | 0.932 | 1.073 | 0.769 | 1.095 | 91.25  | 29.48 | 16 | 49 | 251  | 28.8  | 4.06 |
| Q86W92 | Liprin-beta-1<br>OS=Homo sapiens<br>GN=PPF1BP1<br>PE=1 SV=2 - [LIPB1_HUMAN]                                                     | 22.75 | 3 | 14 | 18 | 54 | 0.881 | 1.113 | 1.080 | 1.095 | 145.92 | 22.75 | 28 | 54 | 1011 | 114.0 | 5.55 |
| Q9UJA5 | tRNA (adenine(58)-N(1))-methyltransferase non-catalytic subunit TRM6<br>OS=Homo sapiens<br>GN=TRMT6<br>PE=1 SV=1 - [TRM6_HUMAN] | 7.65  | 1 | 4  | 4  | 5  | 0.493 | 1.041 | 1.009 | 1.095 | 6.29   | 7.65  | 5  | 5  | 497  | 55.8  | 7.55 |
| O60293 | Zinc finger C3H1 domain-containing protein<br>OS=Homo sapiens<br>GN=ZFC3H1<br>PE=1 SV=3 - [ZC3H1_HUMAN]                         | 2.56  | 1 | 3  | 3  | 4  | 1.257 | 1.278 | 1.234 | 1.095 | 6.33   | 2.56  | 3  | 4  | 1989 | 226.2 | 8.13 |
| O95741 | Copine-6<br>OS=Homo sapiens<br>GN=CPNE6<br>PE=1 SV=3 - [CPNE6_HUMAN]                                                            | 3.23  | 4 | 1  | 2  | 10 | 0.725 | 1.170 | 1.343 | 1.095 | 23.30  | 3.23  | 2  | 10 | 557  | 62.0  | 5.52 |
| P30876 | DNA-directed RNA polymerase II subunit RPB2<br>OS=Homo sapiens<br>GN=POLR2B<br>PE=1 SV=1 - [RPB2_HUMAN]                         | 17.38 | 1 | 15 | 15 | 41 | 0.874 | 1.149 | 0.959 | 1.095 | 99.61  | 17.38 | 22 | 41 | 1174 | 133.8 | 6.87 |
| Q9HBH1 | Peptide deformylase, mitochondrial<br>OS=Homo sapiens<br>GN=PDF PE=1 SV=1 - [DEFM_HUMAN]                                        | 5.76  | 1 | 2  | 2  | 3  | 1.175 | 1.627 | 1.218 | 1.095 | 6.32   | 5.76  | 3  | 3  | 243  | 27.0  | 9.16 |
| P42858 | Huntingtin<br>OS=Homo sapiens<br>GN=HTT PE=1 SV=2 - [HD_HUMAN]                                                                  | 3.79  | 1 | 12 | 13 | 31 | 0.966 | 0.674 | 0.723 | 1.095 | 56.52  | 3.79  | 20 | 31 | 3142 | 347.4 | 6.20 |



|        |                                                                                                                                               |       |    |    |    |     |       |       |       |       |        |       |    |     |      |       |      |
|--------|-----------------------------------------------------------------------------------------------------------------------------------------------|-------|----|----|----|-----|-------|-------|-------|-------|--------|-------|----|-----|------|-------|------|
| Q6NZY4 | Zinc finger<br>CCHC domain-<br>containing<br>protein 8<br>OS=Homo<br>sapiens<br>GN=ZCCHC8<br>PE=1 SV=2 -<br>[ZCHC8_HUMAN<br>]                 | 5.23  | 1  | 3  | 3  | 6   | 1.139 | 1.057 | 0.824 | 1.096 | 12.27  | 5.23  | 4  | 6   | 707  | 78.5  | 4.87 |
| P62328 | Thymosin beta-<br>4 OS=Homo<br>sapiens<br>GN=TMSB4X<br>PE=1 SV=2 -<br>[TYB4_HUMAN]                                                            | 61.36 | 2  | 5  | 8  | 203 | 1.996 | 1.497 | 1.302 | 1.096 | 425.51 | 61.36 | 13 | 203 | 44   | 5.0   | 5.06 |
| Q14554 | Protein<br>disulfide-<br>isomerase A5<br>OS=Homo<br>sapiens<br>GN=PDIA5<br>PE=1 SV=1 -<br>[PDIA5_HUMAN]                                       | 34.87 | 1  | 16 | 16 | 76  | 1.186 | 0.755 | 0.721 | 1.097 | 197.33 | 34.87 | 28 | 76  | 519  | 59.6  | 7.91 |
| O43148 | mRNA cap<br>guanine-N7<br>methyltransfer<br>ase OS=Homo<br>sapiens<br>GN=RNMT<br>PE=1 SV=1 -<br>[MCES_HUMAN]                                  | 16.39 | 1  | 7  | 8  | 17  | 0.829 | 1.084 | 1.080 | 1.097 | 27.93  | 16.39 | 10 | 17  | 476  | 54.8  | 6.61 |
| Q6Y7W6 | PERQ amino<br>acid-rich with<br>GYF domain-<br>containing<br>protein 2<br>OS=Homo<br>sapiens<br>GN=GIQYF2<br>PE=1 SV=1 -<br>[PERQ2_HUMA<br>N] | 14.09 | 2  | 14 | 16 | 59  | 0.986 | 1.232 | 1.237 | 1.097 | 170.10 | 14.09 | 24 | 59  | 1299 | 150.0 | 5.54 |
| Q9P2J8 | Zinc finger<br>protein 624<br>OS=Homo<br>sapiens<br>GN=ZNF624<br>PE=2 SV=3 -<br>[ZNF624_HUMAN<br>]                                            | 5.32  | 96 | 1  | 3  | 7   |       |       |       | 1.097 | 8.99   | 5.32  | 4  | 7   | 865  | 99.9  | 8.88 |
| Q9BW62 | Katanin p60<br>ATPase-<br>containing<br>subunit A-like 1<br>OS=Homo<br>sapiens<br>GN=KATNAL1<br>PE=1 SV=1 -<br>[KATL1_HUMAN<br>]              | 10.00 | 1  | 4  | 4  | 5   | 0.895 | 1.082 | 1.515 | 1.097 | 12.42  | 10.00 | 4  | 5   | 490  | 55.4  | 6.74 |
| P42898 | Methylenetetra<br>hydrofolate<br>reductase<br>OS=Homo<br>sapiens<br>GN=MTHFR<br>PE=1 SV=3 -<br>[MTHR_HUMAN]                                   | 1.68  | 1  | 1  | 1  | 1   | 1.026 | 1.263 | 1.275 | 1.097 | 0.00   | 1.68  | 1  | 1   | 656  | 74.5  | 5.34 |
| Q96J84 | Kin of IRRE-like<br>protein 1<br>OS=Homo<br>sapiens<br>GN=KIRREL<br>PE=1 SV=2 -<br>[KIRRI_HUMAN<br>]                                          | 21.14 | 1  | 12 | 12 | 45  | 1.178 | 0.806 | 0.858 | 1.098 | 115.47 | 21.14 | 22 | 45  | 757  | 83.5  | 5.73 |

|        |                                                                                                         |       |   |    |    |      |       |       |       |       |         |       |    |      |      |       |      |
|--------|---------------------------------------------------------------------------------------------------------|-------|---|----|----|------|-------|-------|-------|-------|---------|-------|----|------|------|-------|------|
| P07203 | Glutathione peroxidase 1<br>OS=Homo sapiens<br>GN=GPX1<br>PE=1 SV=4 - [GPX1_HUMAN]                      | 46.31 | 1 | 7  | 7  | 60   | 1.774 | 0.773 | 0.698 | 1.098 | 135.38  | 46.31 | 12 | 60   | 203  | 22.1  | 6.55 |
| P68371 | Tubulin beta-4B chain<br>OS=Homo sapiens<br>GN=TUBB4B<br>PE=1 SV=1 - [TBB4B_HUMAN]                      | 69.66 | 1 | 2  | 23 | 1186 | 1.438 | 1.267 | 0.935 | 1.098 | 2598.17 | 69.66 | 41 | 1186 | 445  | 49.8  | 4.89 |
| Q13439 | Golgin subfamily A member 4<br>OS=Homo sapiens<br>GN=GOLGA4<br>PE=1 SV=1 - [GOGA4_HUMAN]                | 25.43 | 1 | 53 | 56 | 179  | 0.789 | 0.912 | 0.864 | 1.098 | 375.16  | 25.43 | 89 | 179  | 2230 | 261.0 | 5.39 |
| P04040 | Catalase<br>OS=Homo sapiens<br>GN=CAT PE=1 SV=3 - [CATA_HUMAN]                                          | 46.87 | 1 | 24 | 24 | 168  | 0.594 | 0.991 | 0.694 | 1.098 | 470.80  | 46.87 | 43 | 168  | 527  | 59.7  | 7.39 |
| Q8TC71 | Mitochondria-eating protein<br>OS=Homo sapiens<br>GN=SPATA18<br>PE=1 SV=1 - [MIEAP_HUMAN]               | 1.49  | 1 | 1  | 1  | 2    | 1.171 | 0.930 | 0.785 | 1.098 | 2.11    | 1.49  | 2  | 2    | 538  | 61.1  | 8.63 |
| Q96DV4 | 39S ribosomal protein L38, mitochondrial<br>OS=Homo sapiens<br>GN=MRPL38<br>PE=1 SV=2 - [RM38_HUMAN]    | 22.63 | 1 | 9  | 9  | 26   | 1.024 | 1.273 | 1.056 | 1.098 | 53.06   | 22.63 | 14 | 26   | 380  | 44.6  | 7.53 |
| O94915 | Protein furry homolog-like<br>OS=Homo sapiens<br>GN=FRYL PE=1 SV=2 - [FRYL_HUMAN]                       | 3.75  | 1 | 8  | 9  | 15   | 1.110 | 1.140 | 1.194 | 1.098 | 17.82   | 3.75  | 12 | 15   | 3013 | 339.4 | 5.58 |
| Q96AQ8 | Mitochondrial calcium uniporter regulator 1<br>OS=Homo sapiens<br>GN=MCUR1<br>PE=1 SV=1 - [MCUR1_HUMAN] | 4.74  | 1 | 1  | 2  | 2    | 1.052 | 1.345 | 1.019 | 1.099 | 6.28    | 4.74  | 2  | 2    | 359  | 39.7  | 9.63 |
| O14662 | Syntaxin-16<br>OS=Homo sapiens<br>GN=STX16<br>PE=1 SV=3 - [STX16_HUMAN]                                 | 21.23 | 1 | 5  | 5  | 15   | 0.970 | 0.937 | 0.960 | 1.099 | 42.83   | 21.23 | 9  | 15   | 325  | 37.0  | 6.11 |

|        |                                                                                                                      |       |   |    |    |     |       |       |       |       |         |       |     |     |      |       |      |
|--------|----------------------------------------------------------------------------------------------------------------------|-------|---|----|----|-----|-------|-------|-------|-------|---------|-------|-----|-----|------|-------|------|
| Q12907 | Vesicular integral-membrane protein VIP36<br>OS=Homo sapiens<br>GN=LMAN2<br>PE=1 SV=1 - [LMAN2_HUMAN]                | 48.31 | 1 | 15 | 15 | 121 | 0.951 | 0.747 | 0.708 | 1.099 | 327.72  | 48.31 | 25  | 121 | 356  | 40.2  | 6.95 |
| Q9Y4W6 | AFG3-like protein 2<br>OS=Homo sapiens<br>GN=AFG3L2<br>PE=1 SV=2 - [AFG32_HUMAN]                                     | 30.49 | 1 | 25 | 26 | 81  | 1.081 | 0.987 | 0.786 | 1.099 | 167.60  | 30.49 | 45  | 81  | 797  | 88.5  | 8.66 |
| Q9BV38 | WD repeat-containing protein 18<br>OS=Homo sapiens<br>GN=WDR18<br>PE=1 SV=2 - [WDR18_HUMAN]                          | 18.52 | 1 | 8  | 8  | 40  | 0.832 | 0.835 | 0.934 | 1.099 | 100.43  | 18.52 | 14  | 40  | 432  | 47.4  | 6.70 |
| Q9H9B4 | Sideroflexin-1<br>OS=Homo sapiens<br>GN=SFXN1<br>PE=1 SV=4 - [SFXN1_HUMAN]                                           | 31.99 | 1 | 8  | 9  | 91  | 1.082 | 0.941 | 0.766 | 1.099 | 173.09  | 31.99 | 15  | 91  | 322  | 35.6  | 9.07 |
| Q15746 | Myosin light chain kinase, smooth muscle<br>OS=Homo sapiens<br>GN=MYLK<br>PE=1 SV=4 - [MYLK_HUMAN]                   | 36.47 | 3 | 64 | 65 | 470 | 1.404 | 1.593 | 1.056 | 1.099 | 1216.57 | 36.47 | 113 | 470 | 1914 | 210.6 | 6.15 |
| P53778 | Mitogen-activated protein kinase 12<br>OS=Homo sapiens<br>GN=MAPK12<br>PE=1 SV=3 - [MK12_HUMAN]                      | 8.45  | 3 | 2  | 3  | 8   | 0.849 | 0.669 | 0.564 | 1.099 | 16.00   | 8.45  | 5   | 8   | 367  | 41.9  | 6.39 |
| Q9HCC0 | Methylcrotonoyl-CoA carboxylase beta chain, mitochondrial<br>OS=Homo sapiens<br>GN=MCCC2<br>PE=1 SV=1 - [MCCB_HUMAN] | 17.23 | 1 | 8  | 8  | 34  | 0.939 | 1.206 | 1.124 | 1.100 | 115.28  | 17.23 | 15  | 34  | 563  | 61.3  | 7.68 |
| P61165 | Transmembrane protein 258<br>OS=Homo sapiens<br>GN=TMEM258<br>PE=1 SV=1 - [TM258_HUMAN]                              | 10.13 | 1 | 1  | 1  | 4   | 0.825 | 0.898 | 0.813 | 1.100 | 8.87    | 10.13 | 2   | 4   | 79   | 9.1   | 5.83 |
| Q9NR09 | Baculoviral IAP repeat-containing protein 6<br>OS=Homo sapiens<br>GN=BIRC6<br>PE=1 SV=2 - [BIRC6_HUMAN]              | 3.40  | 1 | 12 | 13 | 23  | 0.937 | 0.912 | 0.947 | 1.100 | 46.59   | 3.40  | 20  | 23  | 4857 | 529.9 | 6.05 |

|        |                                                                                                                           |       |   |    |    |     |       |       |       |       |        |       |    |     |      |       |      |
|--------|---------------------------------------------------------------------------------------------------------------------------|-------|---|----|----|-----|-------|-------|-------|-------|--------|-------|----|-----|------|-------|------|
| Q9UJZ1 | Stomatin-like protein 2, mitochondrial<br>OS=Homo sapiens<br>GN=STOML2<br>PE=1 SV=1 - [STML2_HUMAN]                       | 34.83 | 1 | 13 | 13 | 56  | 1.002 | 0.936 | 0.680 | 1.100 | 143.14 | 34.83 | 23 | 56  | 356  | 38.5  | 7.39 |
| Q9NZN5 | Rho guanine nucleotide exchange factor 12<br>OS=Homo sapiens<br>GN=ARHGEF12<br>PE=1 SV=1 - [ARHGC_HUMAN]                  | 17.81 | 1 | 22 | 22 | 71  | 1.046 | 0.999 | 0.945 | 1.100 | 186.19 | 17.81 | 33 | 71  | 1544 | 173.1 | 5.74 |
| Q53F19 | Uncharacterized protein C17orf85<br>OS=Homo sapiens<br>GN=C17orf85<br>PE=1 SV=2 - [CQ085_HUMAN]                           | 5.65  | 1 | 3  | 3  | 7   | 0.973 | 1.125 | 1.040 | 1.100 | 8.57   | 5.65  | 4  | 7   | 620  | 70.5  | 5.73 |
| Q9H7M4 | Splicing factor, arginine/serine-rich 19<br>OS=Homo sapiens<br>GN=SCAF1<br>PE=1 SV=3 - [SFR19_HUMAN]                      | 4.42  | 1 | 5  | 5  | 12  | 1.215 | 1.000 | 1.146 | 1.100 | 20.89  | 4.42  | 8  | 12  | 1312 | 139.2 | 9.25 |
| Q14152 | Eukaryotic translation initiation factor 3 subunit A<br>OS=Homo sapiens<br>GN=EIF3A<br>PE=1 SV=1 - [EIF3A_HUMAN]          | 31.04 | 1 | 48 | 49 | 233 | 1.006 | 1.101 | 0.958 | 1.100 | 569.86 | 31.04 | 75 | 233 | 1382 | 166.5 | 6.79 |
| O75937 | DnaJ homolog subfamily C member 8<br>OS=Homo sapiens<br>GN=DNAJC8<br>PE=1 SV=2 - [DNJC8_HUMAN]                            | 43.08 | 1 | 10 | 10 | 23  | 1.138 | 1.369 | 0.949 | 1.100 | 53.54  | 43.08 | 14 | 23  | 253  | 29.8  | 9.06 |
| Q9UQB8 | Brain-specific angiogenesis inhibitor 1-associated protein 2<br>OS=Homo sapiens<br>GN=BAIAP2<br>PE=1 SV=1 - [BAIP2_HUMAN] | 14.31 | 1 | 6  | 6  | 17  | 0.909 | 1.179 | 1.225 | 1.100 | 46.91  | 14.31 | 11 | 17  | 552  | 60.8  | 8.90 |
| Q7Z591 | AT-hook-containing transcription factor<br>OS=Homo sapiens<br>GN=AKNA<br>PE=1 SV=2 - [AKNA_HUMAN]                         | 3.27  | 1 | 3  | 3  | 11  | 1.205 | 1.032 | 1.138 | 1.100 | 2.12   | 3.27  | 3  | 11  | 1439 | 155.0 | 6.32 |

|        |                                                                                                                       |       |     |    |    |     |       |       |       |       |        |       |    |     |      |       |      |
|--------|-----------------------------------------------------------------------------------------------------------------------|-------|-----|----|----|-----|-------|-------|-------|-------|--------|-------|----|-----|------|-------|------|
| Q96GD0 | Pyridoxal phosphate phosphatase<br>OS=Homo sapiens<br>GN=PDXP<br>PE=1 SV=2 - [PLPP_HUMAN]                             | 12.16 | 1   | 3  | 3  | 5   | 1.194 | 1.009 | 0.995 | 1.100 | 7.17   | 12.16 | 4  | 5   | 296  | 31.7  | 6.55 |
| P09848 | Lactase-phlorizin hydrolase<br>OS=Homo sapiens<br>GN=LCT PE=1<br>SV=3 - [LPH_HUMAN]                                   | 1.87  | 1   | 3  | 3  | 3   | 2.092 | 1.320 | 0.962 | 1.101 | 2.06   | 1.87  | 3  | 3   | 1927 | 218.4 | 6.34 |
| O95721 | Synaptosomal-associated protein 29<br>OS=Homo sapiens<br>GN=SNAP29<br>PE=1 SV=1 - [SNP29_HUMAN]                       | 46.12 | 1   | 9  | 9  | 23  | 1.387 | 1.201 | 0.961 | 1.101 | 54.74  | 46.12 | 14 | 23  | 258  | 29.0  | 5.81 |
| Q12888 | Tumor suppressor p53-binding protein 1<br>OS=Homo sapiens<br>GN=TP53BP1<br>PE=1 SV=2 - [TP53B_HUMAN]                  | 27.69 | 1   | 41 | 41 | 170 | 1.041 | 1.227 | 1.076 | 1.101 | 404.77 | 27.69 | 63 | 170 | 1972 | 213.4 | 4.70 |
| Q8NCC3 | Group XV phospholipase A2<br>OS=Homo sapiens<br>GN=PLA2G15<br>PE=1 SV=2 - [PAG15_HUMAN]                               | 7.04  | 1   | 2  | 2  | 6   | 0.750 | 0.848 | 1.061 | 1.101 | 5.87   | 7.04  | 3  | 6   | 412  | 46.6  | 6.73 |
| Q9UKF6 | Cleavage and polyadenylation specificity factor subunit 3<br>OS=Homo sapiens<br>GN=CPSF3<br>PE=1 SV=1 - [CPSF3_HUMAN] | 5.12  | 1   | 4  | 4  | 14  | 0.867 | 0.918 | 0.973 | 1.101 | 19.92  | 5.12  | 8  | 14  | 684  | 77.4  | 5.60 |
| P53350 | Serine/threonine-protein kinase PLK1<br>OS=Homo sapiens<br>GN=PLK1 PE=1<br>SV=1 - [PLK1_HUMAN]                        | 3.98  | 1   | 2  | 2  | 3   | 1.183 | 0.480 | 0.989 | 1.101 | 4.40   | 3.98  | 2  | 3   | 603  | 68.2  | 8.91 |
| Q8N8R3 | Mitochondrial basic amino acids transporter<br>OS=Homo sapiens<br>GN=SLC25A29<br>PE=2 SV=2 - [MCATL_HUMAN]            | 3.30  | 1   | 1  | 1  | 2   | 1.557 | 1.724 | 1.358 | 1.101 | 3.71   | 3.30  | 2  | 2   | 303  | 32.0  | 8.75 |
| A6NK53 | Zinc finger protein 233<br>OS=Homo sapiens<br>GN=ZNF233<br>PE=2 SV=3 - [ZNF233_HUMAN]                                 | 10.75 | 120 | 2  | 4  | 7   | 0.577 | 0.691 | 1.105 | 1.101 | 2.55   | 10.75 | 5  | 7   | 670  | 76.8  | 8.25 |

|        |                                                                                                          |       |   |    |    |      |       |       |       |       |         |       |    |      |      |       |      |
|--------|----------------------------------------------------------------------------------------------------------|-------|---|----|----|------|-------|-------|-------|-------|---------|-------|----|------|------|-------|------|
| Q08043 | Alpha-actinin-3<br>OS=Homo sapiens<br>GN=ACTN3<br>PE=1 SV=2 - [ACTN3_HUMAN]                              | 16.09 | 1 | 2  | 17 | 336  | 2.137 | 1.605 | 1.983 | 1.101 | 891.21  | 16.09 | 29 | 336  | 901  | 103.2 | 5.52 |
| Q6ZV89 | SH2 domain-containing protein 5<br>OS=Homo sapiens<br>GN=SH2D5<br>PE=1 SV=2 - [SH2D5_HUMAN]              | 1.65  | 1 | 1  | 1  | 1    | 0.841 | 0.520 | 2.291 | 1.101 | 2.12    | 1.65  | 1  | 1    | 423  | 46.8  | 8.51 |
| O00214 | Galectin-8<br>OS=Homo sapiens<br>GN=LGALS8<br>PE=1 SV=4 - [LEG8_HUMAN]                                   | 17.35 | 1 | 5  | 5  | 17   | 1.010 | 1.221 | 1.012 | 1.101 | 46.24   | 17.35 | 9  | 17   | 317  | 35.8  | 8.25 |
| Q5JSZ5 | Protein PRRC2B<br>OS=Homo sapiens<br>GN=PRRC2B<br>PE=1 SV=2 - [PRC2B_HUMAN]                              | 7.49  | 1 | 13 | 16 | 55   | 1.130 | 0.890 | 1.011 | 1.102 | 105.02  | 7.49  | 21 | 55   | 2229 | 242.8 | 8.34 |
| Q9BW66 | Cyclin-dependent kinase 2-interacting protein<br>OS=Homo sapiens<br>GN=CINP PE=1 SV=1 - [CINP_HUMAN]     | 4.25  | 1 | 1  | 1  | 1    | 1.171 | 0.787 | 0.960 | 1.102 | 0.00    | 4.25  | 1  | 1    | 212  | 24.3  | 6.28 |
| P08238 | Heat shock protein HSP 90-beta<br>OS=Homo sapiens<br>GN=HSP90AB1<br>PE=1 SV=4 - [HS90B_HUMAN]            | 59.25 | 4 | 29 | 55 | 1160 | 0.868 | 0.922 | 1.017 | 1.102 | 2946.90 | 59.25 | 85 | 1160 | 724  | 83.2  | 5.03 |
| Q8NFI3 | Cytosolic endo-beta-N-acetylglucosaminidase<br>OS=Homo sapiens<br>GN=ENGASE<br>PE=1 SV=1 - [ENASE_HUMAN] | 4.17  | 1 | 2  | 2  | 4    | 0.558 | 0.740 | 1.080 | 1.102 | 0.00    | 4.17  | 2  | 4    | 743  | 83.9  | 6.79 |
| Q86TM6 | E3 ubiquitin-protein ligase synoviolin<br>OS=Homo sapiens<br>GN=SYVN1<br>PE=1 SV=2 - [SYVN1_HUMAN]       | 5.02  | 1 | 2  | 2  | 5    | 1.114 | 0.874 | 0.700 | 1.102 | 10.98   | 5.02  | 3  | 5    | 617  | 67.6  | 6.95 |
| Q9GZU8 | Protein FAM192A<br>OS=Homo sapiens<br>GN=FAM192A<br>PE=1 SV=1 - [F192A_HUMAN]                            | 24.02 | 1 | 5  | 6  | 8    | 0.855 | 1.160 | 1.093 | 1.102 | 17.61   | 24.02 | 8  | 8    | 254  | 28.9  | 5.45 |



|        |                                                                                                                  |       |   |    |    |     |       |       |       |       |        |       |    |     |      |       |      |
|--------|------------------------------------------------------------------------------------------------------------------|-------|---|----|----|-----|-------|-------|-------|-------|--------|-------|----|-----|------|-------|------|
| O75940 | Survival of motor neuron-related-splicing factor 30<br>OS=Homo sapiens<br>GN=SMNDC1<br>PE=1 SV=1 - [SPF30_HUMAN] | 29.41 | 1 | 5  | 5  | 20  | 0.985 | 0.973 | 0.781 | 1.102 | 38.56  | 29.41 | 8  | 20  | 238  | 26.7  | 7.24 |
| O15371 | Eukaryotic translation initiation factor 3 subunit D<br>OS=Homo sapiens<br>GN=EIF3D<br>PE=1 SV=1 - [EIF3D_HUMAN] | 22.08 | 1 | 12 | 12 | 61  | 1.047 | 1.011 | 1.088 | 1.102 | 171.89 | 22.08 | 19 | 61  | 548  | 63.9  | 6.05 |
| P05091 | Aldehyde dehydrogenase, mitochondrial<br>OS=Homo sapiens<br>GN=ALDH2<br>PE=1 SV=2 - [ALDH2_HUMAN]                | 51.45 | 1 | 24 | 27 | 172 | 1.426 | 1.023 | 1.005 | 1.102 | 486.09 | 51.45 | 43 | 172 | 517  | 56.3  | 7.05 |
| Q9Y2W6 | Tudor and KH domain-containing protein<br>OS=Homo sapiens<br>GN=TDRKH<br>PE=1 SV=2 - [TDRKH_HUMAN]               | 3.21  | 1 | 1  | 1  | 1   | 2.031 | 1.116 | 1.463 | 1.102 | 2.72   | 3.21  | 1  | 1   | 561  | 62.0  | 5.02 |
| O60664 | Perilipin-3<br>OS=Homo sapiens<br>GN=PLIN3<br>PE=1 SV=3 - [PLIN3_HUMAN]                                          | 62.21 | 1 | 25 | 25 | 238 | 1.094 | 0.802 | 1.077 | 1.103 | 668.96 | 62.21 | 44 | 238 | 434  | 47.0  | 5.44 |
| Q2VPK5 | Cytoplasmic tRNA 2-thiolation protein 2<br>OS=Homo sapiens<br>GN=CTU2<br>PE=1 SV=1 - [CTU2_HUMAN]                | 5.83  | 1 | 3  | 3  | 4   | 1.025 | 0.956 | 1.072 | 1.103 | 4.81   | 5.83  | 3  | 4   | 515  | 56.1  | 6.32 |
| Q15788 | Nuclear receptor coactivator 1<br>OS=Homo sapiens<br>GN=NCOA1<br>PE=1 SV=3 - [NCOA1_HUMA]                        | 1.32  | 1 | 1  | 1  | 2   | 2.509 | 0.964 | 0.873 | 1.103 | 0.00   | 1.32  | 1  | 2   | 1441 | 156.7 | 6.20 |
| P13798 | Acylamino-acid-releasing enzyme<br>OS=Homo sapiens<br>GN=APEH<br>PE=1 SV=4 - [ACPH_HUMAN]                        | 27.46 | 1 | 15 | 15 | 33  | 1.315 | 1.128 | 1.056 | 1.103 | 95.45  | 27.46 | 22 | 33  | 732  | 81.2  | 5.48 |
| Q96B54 | Zinc finger protein 428<br>OS=Homo sapiens<br>GN=ZNF428<br>PE=1 SV=2 - [ZNF428_HUMAN]                            | 7.45  | 1 | 1  | 1  | 1   | 1.206 | 0.816 | 1.175 | 1.103 | 3.79   | 7.45  | 1  | 1   | 188  | 20.5  | 4.17 |

|        |                                                                                                                                                             |       |   |    |    |     |       |       |       |       |        |       |    |     |      |       |       |
|--------|-------------------------------------------------------------------------------------------------------------------------------------------------------------|-------|---|----|----|-----|-------|-------|-------|-------|--------|-------|----|-----|------|-------|-------|
| P49720 | Proteasome subunit beta type-3<br>OS=Homo sapiens<br>GN=PSMB3<br>PE=1 SV=2 - [PSB3_HUMAN]                                                                   | 22.93 | 1 | 5  | 5  | 17  | 0.999 | 0.845 | 0.763 | 1.103 | 43.22  | 22.93 | 6  | 17  | 205  | 22.9  | 6.55  |
| Q9H078 | Caseinolytic peptidase B protein homolog<br>OS=Homo sapiens<br>GN=CLPB PE=1 SV=1 - [CLPB_HUMAN]                                                             | 21.92 | 1 | 11 | 12 | 32  | 1.042 | 1.166 | 1.102 | 1.103 | 94.46  | 21.92 | 18 | 32  | 707  | 78.7  | 9.01  |
| P49207 | 60S ribosomal protein L34<br>OS=Homo sapiens<br>GN=RPL34<br>PE=1 SV=3 - [RL34_HUMAN]                                                                        | 47.01 | 1 | 9  | 9  | 82  | 0.934 | 1.115 | 1.128 | 1.103 | 213.84 | 47.01 | 15 | 82  | 117  | 13.3  | 11.47 |
| Q13905 | Rap guanine nucleotide exchange factor 1<br>OS=Homo sapiens<br>GN=RAPGEF1<br>PE=1 SV=3 - [RPGF1_HUMAN<br>RaIBP1-associated Eps domain-containing protein 1] | 2.04  | 1 | 2  | 2  | 4   | 1.278 | 1.434 | 1.364 | 1.104 | 7.30   | 2.04  | 4  | 4   | 1077 | 120.5 | 5.92  |
| Q96D71 | Splicing factor, suppressor of white-apricot homolog<br>OS=Homo sapiens<br>GN=REPS1<br>PE=1 SV=3 - [REPS1_HUMAN]                                            | 10.43 | 2 | 8  | 8  | 22  | 0.831 | 1.041 | 0.952 | 1.104 | 47.94  | 10.43 | 11 | 22  | 796  | 86.6  | 5.69  |
| Q12872 | Alpha-internexin<br>OS=Homo sapiens<br>GN=INA PE=1 SV=2 - [AINX_HUMAN]                                                                                      | 2.94  | 1 | 3  | 3  | 6   | 1.158 | 1.551 | 1.356 | 1.104 | 10.14  | 2.94  | 4  | 6   | 951  | 104.8 | 8.05  |
| Q16352 | Breakpoint cluster region protein<br>OS=Homo sapiens<br>GN=BCR PE=1 SV=2 - [BCR_HUMAN]                                                                      | 41.68 | 2 | 17 | 21 | 181 | 4.186 | 0.874 | 0.988 | 1.104 | 432.24 | 41.68 | 33 | 181 | 499  | 55.4  | 5.40  |
| P11274 | Breakpoint cluster region protein<br>OS=Homo sapiens<br>GN=BCR PE=1 SV=2 - [BCR_HUMAN]                                                                      | 6.69  | 1 | 6  | 8  | 25  | 1.090 | 0.847 | 1.110 | 1.104 | 59.56  | 6.69  | 13 | 25  | 1271 | 142.7 | 7.03  |

|        |                                                                                                                             |       |   |    |    |     |       |       |       |       |        |       |    |     |      |       |      |
|--------|-----------------------------------------------------------------------------------------------------------------------------|-------|---|----|----|-----|-------|-------|-------|-------|--------|-------|----|-----|------|-------|------|
| Q8IV20 | Laccase domain-containing protein 1<br>OS=Homo sapiens<br>GN=LACC1<br>PE=1 SV=1 - [LACC1_HUMAN]                             | 7.91  | 1 | 3  | 3  | 8   | 0.736 | 0.540 | 1.146 | 1.104 | 18.94  | 7.91  | 6  | 8   | 430  | 47.7  | 7.06 |
| O95183 | Vesicle-associated membrane protein 5<br>OS=Homo sapiens<br>GN=VAMP5<br>PE=1 SV=1 - [VAMP5_HUMAN]                           | 36.21 | 1 | 3  | 4  | 13  | 1.578 | 0.882 | 0.903 | 1.104 | 28.35  | 36.21 | 6  | 13  | 116  | 12.8  | 7.85 |
| P49748 | Very long-chain specific acyl-CoA dehydrogenase, mitochondrial<br>OS=Homo sapiens<br>GN=ACADVL<br>PE=1 SV=1 - [ACADV_HUMAN] | 36.49 | 1 | 25 | 25 | 188 | 1.091 | 1.375 | 1.054 | 1.104 | 441.74 | 36.49 | 43 | 188 | 655  | 70.3  | 8.75 |
| Q9BVG4 | Protein PBDC1<br>OS=Homo sapiens<br>GN=PBDC1<br>PE=1 SV=1 - [PBDC1_HUMAN]                                                   | 21.46 | 1 | 5  | 5  | 14  | 1.572 | 1.122 | 0.961 | 1.104 | 36.05  | 21.46 | 8  | 14  | 233  | 26.0  | 4.79 |
| Q9UHX1 | Poly(U)-binding-splicing factor PUF60<br>OS=Homo sapiens<br>GN=PUF60<br>PE=1 SV=1 - [PUF60_HUMAN]                           | 28.26 | 1 | 15 | 15 | 64  | 0.979 | 1.167 | 0.968 | 1.104 | 135.58 | 28.26 | 27 | 64  | 559  | 59.8  | 5.29 |
| Q9BW27 | Nuclear pore complex protein Nup85<br>OS=Homo sapiens<br>GN=NUP85<br>PE=1 SV=1 - [NUP85_HUMAN]                              | 8.84  | 1 | 6  | 7  | 18  | 0.994 | 0.935 | 0.853 | 1.104 | 34.77  | 8.84  | 11 | 18  | 656  | 75.0  | 5.55 |
| Q9UM54 | Unconventional myosin-VI<br>OS=Homo sapiens<br>GN=MYO6<br>PE=1 SV=4 - [MYO6_HUMAN]                                          | 24.34 | 1 | 30 | 30 | 110 | 0.997 | 0.955 | 0.806 | 1.104 | 246.99 | 24.34 | 50 | 110 | 1294 | 149.6 | 8.53 |
| P07919 | Cytochrome b-c1 complex subunit 6, mitochondrial<br>OS=Homo sapiens<br>GN=UQCRH<br>PE=1 SV=2 - [QCR6_HUMAN]                 | 38.46 | 1 | 4  | 4  | 51  | 0.961 | 1.111 | 0.699 | 1.104 | 169.23 | 38.46 | 8  | 51  | 91   | 10.7  | 4.44 |

|        |                                                                                                                   |       |   |    |    |    |       |       |       |       |        |       |    |    |      |       |      |
|--------|-------------------------------------------------------------------------------------------------------------------|-------|---|----|----|----|-------|-------|-------|-------|--------|-------|----|----|------|-------|------|
| P35244 | Replication protein A 14 kDa subunit<br>OS=Homo sapiens<br>GN=RPA3<br>PE=1 SV=1 - [RFA3_HUMAN]                    | 14.05 | 1 | 1  | 1  | 2  | 1.609 | 1.116 | 1.009 | 1.104 | 7.68   | 14.05 | 2  | 2  | 121  | 13.6  | 5.08 |
| P41226 | Ubiquitin-like modifier-activating enzyme 7<br>OS=Homo sapiens<br>GN=UBA7<br>PE=1 SV=2 - [UBA7_HUMAN]             | 14.23 | 1 | 11 | 12 | 38 | 1.463 | 0.898 | 0.825 | 1.104 | 105.12 | 14.23 | 19 | 38 | 1012 | 111.6 | 6.04 |
| Q14353 | Guanidinoacetate N-methyltransferase<br>OS=Homo sapiens<br>GN=GAMT<br>PE=1 SV=1 - [GAMT_HUMAN]                    | 12.71 | 1 | 2  | 2  | 6  | 1.017 | 1.091 | 1.231 | 1.104 | 11.25  | 12.71 | 3  | 6  | 236  | 26.3  | 6.14 |
| Q9UKV8 | Protein argonaute-2<br>OS=Homo sapiens<br>GN=AGO2<br>PE=1 SV=3 - [AGO2_HUMAN]                                     | 15.72 | 1 | 8  | 12 | 27 | 1.123 | 1.121 | 1.028 | 1.105 | 55.36  | 15.72 | 17 | 27 | 859  | 97.1  | 9.19 |
| Q15555 | Microtubule-associated protein RP/EB family member 2<br>OS=Homo sapiens<br>GN=MAPRE2<br>PE=1 SV=1 - [MARE2_HUMAN] | 20.80 | 1 | 3  | 6  | 16 | 1.159 | 1.569 | 1.422 | 1.105 | 43.80  | 20.80 | 7  | 16 | 327  | 37.0  | 5.57 |
| P08579 | U2 small nuclear ribonucleoprotein B'<br>OS=Homo sapiens<br>GN=SNRPB2<br>PE=1 SV=1 - [RU2B_HUMAN]                 | 31.11 | 1 | 6  | 8  | 25 | 0.946 | 1.175 | 1.183 | 1.105 | 62.40  | 31.11 | 12 | 25 | 225  | 25.5  | 9.72 |
| Q7Z4F1 | Low-density lipoprotein receptor-related protein 10<br>OS=Homo sapiens<br>GN=LRP10<br>PE=1 SV=2 - [LRP10_HUMAN]   | 4.63  | 1 | 2  | 2  | 4  | 0.788 | 0.801 | 0.953 | 1.105 | 15.38  | 4.63  | 3  | 4  | 713  | 76.1  | 5.52 |
| O75153 | Clustered mitochondria protein homolog<br>OS=Homo sapiens<br>GN=CLUH PE=1 SV=2 - [CLU_HUMAN]                      | 7.26  | 1 | 9  | 9  | 21 | 0.887 | 0.987 | 1.281 | 1.105 | 49.61  | 7.26  | 13 | 21 | 1309 | 146.6 | 6.13 |

|        |                                                                                                                                                                                                                                                                                                                                                                                                                                                                                                                                                                                                        |       |   |    |    |     |       |       |       |       |        |       |    |     |      |       |       |
|--------|--------------------------------------------------------------------------------------------------------------------------------------------------------------------------------------------------------------------------------------------------------------------------------------------------------------------------------------------------------------------------------------------------------------------------------------------------------------------------------------------------------------------------------------------------------------------------------------------------------|-------|---|----|----|-----|-------|-------|-------|-------|--------|-------|----|-----|------|-------|-------|
| Q7Z6B7 | SLIT-ROBO<br>Rho GTPase-<br>activating<br>protein 1<br>OS=Homo<br>sapiens<br>GN=SRGAP1<br>PE=1 SV=1 -<br>[SRGP1_HUMAN<br>]<br>Transcription<br>elongation<br>factor SPT6<br>OS=Homo<br>sapiens<br>GN=SPT6H<br>PE=1 SV=2 -<br>[SPT6H_HUMAN<br>]<br>Cytochrome c<br>oxidase subunit<br>6C OS=Homo<br>sapiens<br>GN=COX6C<br>PE=1 SV=2 -<br>[COX6C_HUMA<br>N]                                                                                                                                                                                                                                             | 11.80 | 1 | 8  | 12 | 35  | 0.768 | 0.948 | 0.837 | 1.105 | 91.94  | 11.80 | 19 | 35  | 1085 | 124.2 | 6.83  |
| Q7KZ85 | Choline/ethano<br>lamine kinase<br>OS=Homo<br>sapiens<br>GN=CHKB<br>PE=1 SV=3 -<br>[CHKB_HUMAN]                                                                                                                                                                                                                                                                                                                                                                                                                                                                                                        | 10.25 | 1 | 14 | 15 | 39  | 1.135 | 0.991 | 0.915 | 1.105 | 83.24  | 10.25 | 21 | 39  | 1726 | 198.9 | 4.91  |
| P09669 | Regulator of<br>nonsense<br>transcripts 1<br>OS=Homo<br>sapiens<br>GN=UPF1<br>PE=1 SV=2 -<br>[RENT1_HUMAN<br>]<br>Complement<br>C1q-like<br>protein 3<br>OS=Homo<br>sapiens<br>GN=C1QL3<br>PE=2 SV=1 -<br>[C1QL3_HUMAN<br>]<br>Putative RNA-<br>binding protein<br>15B OS=Homo<br>sapiens<br>GN=RBM15B<br>PE=1 SV=3 -<br>[RB15B_HUMAN<br>]<br>Disintegrin and<br>metalloprotein<br>ase domain-<br>containing<br>protein 17<br>OS=Homo<br>sapiens<br>GN=ADAM17<br>PE=1 SV=1 -<br>[ADA17_HUMAN<br>]<br>HCLS1-binding<br>protein 3<br>OS=Homo<br>sapiens<br>GN=HS1BP3<br>PE=1 SV=1 -<br>[H1BP3_HUMAN<br>] | 52.00 | 1 | 8  | 8  | 48  | 0.938 | 1.009 | 0.803 | 1.106 | 67.30  | 52.00 | 14 | 48  | 75   | 8.8   | 10.39 |
| Q9Y259 | Regulator of<br>nonsense<br>transcripts 1<br>OS=Homo<br>sapiens<br>GN=UPF1<br>PE=1 SV=2 -<br>[RENT1_HUMAN<br>]<br>Complement<br>C1q-like<br>protein 3<br>OS=Homo<br>sapiens<br>GN=C1QL3<br>PE=2 SV=1 -<br>[C1QL3_HUMAN<br>]<br>Putative RNA-<br>binding protein<br>15B OS=Homo<br>sapiens<br>GN=RBM15B<br>PE=1 SV=3 -<br>[RB15B_HUMAN<br>]<br>Disintegrin and<br>metalloprotein<br>ase domain-<br>containing<br>protein 17<br>OS=Homo<br>sapiens<br>GN=ADAM17<br>PE=1 SV=1 -<br>[ADA17_HUMAN<br>]<br>HCLS1-binding<br>protein 3<br>OS=Homo<br>sapiens<br>GN=HS1BP3<br>PE=1 SV=1 -<br>[H1BP3_HUMAN<br>] | 16.96 | 1 | 5  | 5  | 17  | 1.204 | 1.155 | 0.849 | 1.106 | 33.53  | 16.96 | 8  | 17  | 395  | 45.2  | 5.49  |
| Q92900 | Regulator of<br>nonsense<br>transcripts 1<br>OS=Homo<br>sapiens<br>GN=UPF1<br>PE=1 SV=2 -<br>[RENT1_HUMAN<br>]<br>Complement<br>C1q-like<br>protein 3<br>OS=Homo<br>sapiens<br>GN=C1QL3<br>PE=2 SV=1 -<br>[C1QL3_HUMAN<br>]<br>Putative RNA-<br>binding protein<br>15B OS=Homo<br>sapiens<br>GN=RBM15B<br>PE=1 SV=3 -<br>[RB15B_HUMAN<br>]<br>Disintegrin and<br>metalloprotein<br>ase domain-<br>containing<br>protein 17<br>OS=Homo<br>sapiens<br>GN=ADAM17<br>PE=1 SV=1 -<br>[ADA17_HUMAN<br>]<br>HCLS1-binding<br>protein 3<br>OS=Homo<br>sapiens<br>GN=HS1BP3<br>PE=1 SV=1 -<br>[H1BP3_HUMAN<br>] | 28.08 | 1 | 26 | 26 | 106 | 0.989 | 1.000 | 1.008 | 1.106 | 257.14 | 28.08 | 43 | 106 | 1129 | 124.3 | 6.61  |
| Q5VWW1 | Disintegrin and<br>metalloprotein<br>ase domain-<br>containing<br>protein 17<br>OS=Homo<br>sapiens<br>GN=ADAM17<br>PE=1 SV=1 -<br>[ADA17_HUMAN<br>]<br>HCLS1-binding<br>protein 3<br>OS=Homo<br>sapiens<br>GN=HS1BP3<br>PE=1 SV=1 -<br>[H1BP3_HUMAN<br>]                                                                                                                                                                                                                                                                                                                                               | 5.49  | 1 | 1  | 1  | 1   | 1.414 | 0.810 | 0.774 | 1.106 | 0.00   | 5.49  | 1  | 1   | 255  | 26.7  | 6.79  |
| Q8NDT2 | Disintegrin and<br>metalloprotein<br>ase domain-<br>containing<br>protein 17<br>OS=Homo<br>sapiens<br>GN=ADAM17<br>PE=1 SV=1 -<br>[ADA17_HUMAN<br>]<br>HCLS1-binding<br>protein 3<br>OS=Homo<br>sapiens<br>GN=HS1BP3<br>PE=1 SV=1 -<br>[H1BP3_HUMAN<br>]                                                                                                                                                                                                                                                                                                                                               | 1.01  | 1 | 1  | 1  | 2   | 1.058 | 2.003 | 1.319 | 1.106 | 4.93   | 1.01  | 2  | 2   | 890  | 97.1  | 9.85  |
| P78536 | Disintegrin and<br>metalloprotein<br>ase domain-<br>containing<br>protein 17<br>OS=Homo<br>sapiens<br>GN=ADAM17<br>PE=1 SV=1 -<br>[ADA17_HUMAN<br>]<br>HCLS1-binding<br>protein 3<br>OS=Homo<br>sapiens<br>GN=HS1BP3<br>PE=1 SV=1 -<br>[H1BP3_HUMAN<br>]                                                                                                                                                                                                                                                                                                                                               | 9.34  | 1 | 7  | 7  | 18  | 1.434 | 0.787 | 0.815 | 1.106 | 44.41  | 9.34  | 12 | 18  | 824  | 93.0  | 5.76  |
| Q53T59 | Disintegrin and<br>metalloprotein<br>ase domain-<br>containing<br>protein 17<br>OS=Homo<br>sapiens<br>GN=ADAM17<br>PE=1 SV=1 -<br>[ADA17_HUMAN<br>]<br>HCLS1-binding<br>protein 3<br>OS=Homo<br>sapiens<br>GN=HS1BP3<br>PE=1 SV=1 -<br>[H1BP3_HUMAN<br>]                                                                                                                                                                                                                                                                                                                                               | 23.47 | 1 | 7  | 7  | 17  | 1.068 | 1.268 | 1.208 | 1.107 | 39.19  | 23.47 | 10 | 17  | 392  | 42.8  | 5.01  |

|        |                                                                                                                                                                                     |       |   |    |    |    |       |       |       |       |       |       |    |    |      |       |      |
|--------|-------------------------------------------------------------------------------------------------------------------------------------------------------------------------------------|-------|---|----|----|----|-------|-------|-------|-------|-------|-------|----|----|------|-------|------|
| Q9NSC5 | Homer protein homolog 3<br>OS=Homo sapiens<br>GN=HOMER3<br>PE=1 SV=2 - [HOME3_HUMAN]<br>RWD domain-containing protein 3<br>OS=Homo sapiens<br>GN=RWDD3<br>PE=1 SV=4 - [RWDD3_HUMAN] | 37.40 | 1 | 12 | 13 | 27 | 1.028 | 1.134 | 1.117 | 1.107 | 60.82 | 37.40 | 17 | 27 | 361  | 39.8  | 5.45 |
| Q9Y3V2 | Protein VPRBP<br>OS=Homo sapiens<br>GN=VPRBP<br>PE=1 SV=3 - [VPRBP_HUMAN]                                                                                                           | 3.75  | 1 | 1  | 1  | 1  | 0.974 | 1.664 | 1.553 | 1.107 | 2.78  | 3.75  | 1  | 1  | 267  | 30.5  | 6.18 |
| Q9Y4B6 | F-box only protein 4<br>OS=Homo sapiens<br>GN=FBXO4<br>PE=1 SV=2 - [FBX4_HUMAN]                                                                                                     | 8.23  | 1 | 6  | 6  | 13 | 1.234 | 1.008 | 1.090 | 1.107 | 17.36 | 8.23  | 10 | 13 | 1507 | 168.9 | 5.06 |
| Q9UKT5 | Embryonal Fyn-associated substrate<br>OS=Homo sapiens<br>GN=EFS PE=2 SV=1 - [EFS_HUMAN]                                                                                             | 6.72  | 1 | 3  | 3  | 5  | 0.870 | 0.699 | 0.858 | 1.107 | 7.51  | 6.72  | 4  | 5  | 387  | 44.1  | 6.16 |
| O43281 | 2'-5'-oligoadenylate synthase 2<br>OS=Homo sapiens<br>GN=OAS2<br>PE=1 SV=3 - [OAS2_HUMAN]                                                                                           | 1.43  | 1 | 1  | 1  | 1  | 0.739 | 0.996 | 1.471 | 1.107 | 1.92  | 1.43  | 1  | 1  | 561  | 58.8  | 5.11 |
| P29728 | Myocyte-specific enhancer factor 2A<br>OS=Homo sapiens<br>GN=MEF2A<br>PE=1 SV=1 - [MEF2A_HUMAN]                                                                                     | 4.17  | 1 | 2  | 2  | 9  | 1.977 | 0.755 | 0.975 | 1.107 | 18.09 | 4.17  | 3  | 9  | 719  | 82.4  | 8.25 |
| Q02078 | Zinc finger SWIM domain-containing protein 8<br>OS=Homo sapiens<br>GN=ZSWIM8<br>PE=1 SV=1 - [ZSWIM8_HUMAN]                                                                          | 5.52  | 2 | 2  | 2  | 2  | 1.286 | 0.869 | 0.346 | 1.107 | 0.00  | 5.52  | 2  | 2  | 507  | 54.8  | 7.91 |
| A7E2V4 | NADH dehydrogenase [ubiquinone] 1 alpha subcomplex subunit 8<br>OS=Homo sapiens<br>GN=NDUFA8<br>PE=1 SV=3 - [NDUA8_HUMAN]                                                           | 2.50  | 1 | 4  | 4  | 6  | 1.120 | 0.704 | 1.135 | 1.107 | 12.83 | 2.50  | 5  | 6  | 1837 | 197.2 | 6.80 |
| P51970 |                                                                                                                                                                                     | 20.93 | 1 | 3  | 3  | 12 | 0.639 | 0.889 | 0.821 | 1.107 | 20.29 | 20.93 | 5  | 12 | 172  | 20.1  | 7.65 |

|        |                                                                                                                                      |       |   |   |   |    |       |       |       |       |        |       |    |    |     |      |       |
|--------|--------------------------------------------------------------------------------------------------------------------------------------|-------|---|---|---|----|-------|-------|-------|-------|--------|-------|----|----|-----|------|-------|
| P0CG12 | Chromosome transmission fidelity protein 8 homolog isoform 2<br>OS=Homo sapiens<br>GN=CHTF8<br>PE=1 SV=1 - [CTF8A_HUMAN]             | 7.06  | 1 | 3 | 3 | 3  | 1.367 | 1.003 | 1.499 | 1.108 | 6.60   | 7.06  | 3  | 3  | 524 | 51.4 | 12.41 |
| Q9H6Z4 | Ran-binding protein 3<br>OS=Homo sapiens<br>GN=RANBP3<br>PE=1 SV=1 - [RANB3_HUMAN]                                                   | 12.17 | 1 | 6 | 6 | 16 | 0.847 | 1.099 | 0.901 | 1.108 | 31.37  | 12.17 | 10 | 16 | 567 | 60.2 | 4.78  |
| O75794 | Cell division cycle protein 123 homolog<br>OS=Homo sapiens<br>GN=CDC123<br>PE=1 SV=1 - [CD123_HUMAN]                                 | 5.36  | 1 | 2 | 2 | 4  | 0.890 | 0.859 | 1.467 | 1.108 | 7.52   | 5.36  | 3  | 4  | 336 | 39.1 | 4.81  |
| Q9C0F1 | Centrosomal protein of 44 kDa<br>OS=Homo sapiens<br>GN=CEP44<br>PE=1 SV=2 - [CEP44_HUMAN]                                            | 11.54 | 1 | 3 | 3 | 5  | 1.011 | 1.322 | 1.112 | 1.108 | 21.98  | 11.54 | 3  | 5  | 390 | 44.1 | 5.21  |
| Q8IYS8 | Putative biorientation of chromosomes in cell division protein 1-like 2<br>OS=Homo sapiens<br>GN=BOD1L2<br>PE=5 SV=2 - [BD1L2_HUMAN] | 10.47 | 1 | 1 | 1 | 1  | 0.483 | 1.069 | 0.487 | 1.108 | 2.40   | 10.47 | 1  | 1  | 172 | 18.1 | 5.33  |
| Q9BW83 | Intraflagellar transport protein 27 homolog<br>OS=Homo sapiens<br>GN=IFT27<br>PE=1 SV=1 - [IFT27_HUMAN]                              | 30.11 | 1 | 4 | 4 | 9  | 0.991 | 0.643 | 0.863 | 1.108 | 22.39  | 30.11 | 6  | 9  | 186 | 20.5 | 5.41  |
| Q9NP72 | Ras-related protein Rab-18<br>OS=Homo sapiens<br>GN=RAB18<br>PE=1 SV=1 - [RAB18_HUMAN]                                               | 43.20 | 1 | 8 | 8 | 24 | 0.994 | 0.748 | 0.885 | 1.108 | 53.24  | 43.20 | 15 | 24 | 206 | 23.0 | 5.24  |
| Q07812 | Apoptosis regulator BAX<br>OS=Homo sapiens<br>GN=BAX<br>PE=1 SV=1 - [BAX_HUMAN]                                                      | 33.33 | 1 | 7 | 7 | 89 | 0.986 | 1.215 | 1.000 | 1.108 | 265.84 | 33.33 | 12 | 89 | 192 | 21.2 | 5.22  |

|        |                                                                                                                                                                                                                            |       |   |    |    |    |       |       |       |       |        |       |    |    |      |       |      |
|--------|----------------------------------------------------------------------------------------------------------------------------------------------------------------------------------------------------------------------------|-------|---|----|----|----|-------|-------|-------|-------|--------|-------|----|----|------|-------|------|
| O15321 | Transmembrane 9 superfamily member 1<br>OS=Homo sapiens<br>GN=TM9SF1<br>PE=2 SV=2 - [TM9S1_HUMAN]<br>Cleavage and polyadenylation specificity factor subunit 6<br>OS=Homo sapiens<br>GN=CPSF6<br>PE=1 SV=2 - [CPSF6_HUMAN] | 10.89 | 1 | 7  | 7  | 15 | 1.090 | 0.714 | 0.712 | 1.108 | 36.32  | 10.89 | 9  | 15 | 606  | 68.8  | 7.17 |
| Q16630 | MAP7 domain-containing protein 3<br>OS=Homo sapiens<br>GN=MAP7D3<br>PE=1 SV=2 - [MAP7D3_HUMAN]<br>Ubiquitin carboxyl-terminal hydrolase 34<br>OS=Homo sapiens<br>GN=USP34<br>PE=1 SV=2 - [UBP34_HUMAN]                     | 25.23 | 1 | 10 | 10 | 48 | 1.197 | 1.215 | 1.012 | 1.108 | 117.85 | 25.23 | 16 | 48 | 551  | 59.2  | 7.15 |
| Q8IWC1 | Nephrocystin-3<br>OS=Homo sapiens<br>GN=NPHP3<br>PE=1 SV=1 - [NPHP3_HUMAN]                                                                                                                                                 | 4.45  | 2 | 2  | 6  | 12 | 0.853 | 0.999 | 0.855 | 1.108 | 23.37  | 4.45  | 6  | 12 | 876  | 98.4  | 9.32 |
| Q70CQ2 | Guanine nucleotide-binding protein G(I)/G(S)/G(O) subunit gamma-2<br>OS=Homo sapiens<br>GN=GNG2<br>PE=1 SV=2 - [GBG2_HUMAN]                                                                                                | 1.18  | 1 | 4  | 4  | 5  | 0.977 | 0.885 | 0.940 | 1.108 | 13.27  | 1.18  | 4  | 5  | 3546 | 404.0 | 5.82 |
| Q7Z494 | Intraflagellar transport protein 81 homolog<br>OS=Homo sapiens<br>GN=IFT81<br>PE=1 SV=1 - [IFT81_HUMAN]                                                                                                                    | 2.18  | 3 | 2  | 3  | 5  | 1.672 | 1.081 | 1.454 | 1.108 | 4.55   | 2.18  | 5  | 5  | 1330 | 150.8 | 6.76 |
| P59768 | Cytoplasmic dynein 1 light intermediate chain 1<br>OS=Homo sapiens<br>GN=DYNC1L1<br>PE=1 SV=3 - [DC1L1_HUMAN]                                                                                                              | 54.93 | 1 | 4  | 5  | 7  | 1.394 | 2.865 | 1.507 | 1.109 | 15.70  | 54.93 | 5  | 7  | 71   | 7.8   | 7.99 |
| Q8WYA0 |                                                                                                                                                                                                                            | 9.91  | 2 | 6  | 7  | 10 | 1.140 | 1.357 | 0.987 | 1.109 | 29.53  | 9.91  | 7  | 10 | 676  | 79.7  | 8.82 |
| Q9Y6G9 |                                                                                                                                                                                                                            | 39.58 | 1 | 15 | 16 | 44 | 1.270 | 1.067 | 1.016 | 1.109 | 111.84 | 39.58 | 25 | 44 | 523  | 56.5  | 6.42 |



|        |                                                                                                                               |       |   |    |    |    |       |       |       |       |        |       |    |    |      |       |      |
|--------|-------------------------------------------------------------------------------------------------------------------------------|-------|---|----|----|----|-------|-------|-------|-------|--------|-------|----|----|------|-------|------|
| Q9Y484 | WD repeat domain phosphoinositide-interacting protein 4<br>OS=Homo sapiens<br>GN=WDR45<br>PE=2 SV=1 - [WIP14_HUMAN]           | 2.50  | 1 | 1  | 1  | 1  | 0.690 | 1.420 | 1.601 | 1.110 | 0.00   | 2.50  | 1  | 1  | 360  | 39.8  | 7.14 |
| Q8IXS0 | Protein FAM217A<br>OS=Homo sapiens<br>GN=FAM217A<br>PE=2 SV=2 - [F217A_HUMAN]                                                 | 3.74  | 2 | 1  | 2  | 3  | 1.118 | 1.653 | 0.939 | 1.110 | 4.39   | 3.74  | 3  | 3  | 508  | 57.4  | 8.44 |
| Q86XP3 | ATP-dependent RNA helicase DDX42<br>OS=Homo sapiens<br>GN=DDX42<br>PE=1 SV=1 - [DDX42_HUMAN]                                  | 30.28 | 1 | 22 | 22 | 59 | 1.118 | 1.172 | 0.979 | 1.110 | 139.80 | 30.28 | 36 | 59 | 938  | 102.9 | 7.02 |
| O15127 | Secretory carrier-associated membrane protein 2<br>OS=Homo sapiens<br>GN=SCAMP2<br>PE=1 SV=2 - [SCAM2_HUMAN]                  | 14.29 | 1 | 4  | 4  | 39 | 0.894 | 0.934 | 0.809 | 1.110 | 113.98 | 14.29 | 7  | 39 | 329  | 36.6  | 6.10 |
| P08236 | Beta-glucuronidase<br>OS=Homo sapiens<br>GN=GUSB<br>PE=1 SV=2 - [BGLR_HUMAN]                                                  | 11.37 | 1 | 10 | 10 | 22 | 1.549 | 1.638 | 0.789 | 1.110 | 44.42  | 11.37 | 13 | 22 | 651  | 74.7  | 7.02 |
| Q9Y5B9 | FACT complex subunit SPT16<br>OS=Homo sapiens<br>GN=SUPT16H<br>PE=1 SV=1 - [SP16H_HUMAN]                                      | 19.01 | 1 | 19 | 20 | 58 | 1.025 | 1.128 | 0.909 | 1.110 | 138.95 | 19.01 | 30 | 58 | 1047 | 119.8 | 5.66 |
| Q9UHI8 | A disintegrin and metalloproteinase with thrombospondin motifs 1<br>OS=Homo sapiens<br>GN=ADAMTS1<br>PE=1 SV=4 - [ATS1_HUMAN] | 6.51  | 1 | 6  | 6  | 18 | 2.951 | 0.408 | 0.461 | 1.110 | 37.46  | 6.51  | 9  | 18 | 967  | 105.3 | 6.83 |
| Q5JTH9 | RRP12-like protein<br>OS=Homo sapiens<br>GN=RRP12<br>PE=1 SV=2 - [RRP12_HUMAN]                                                | 12.10 | 1 | 13 | 14 | 34 | 0.922 | 0.959 | 0.936 | 1.110 | 68.86  | 12.10 | 20 | 34 | 1297 | 143.6 | 8.75 |

|        |                                                                                                                |       |   |    |    |     |       |       |       |       |        |       |    |     |      |       |      |
|--------|----------------------------------------------------------------------------------------------------------------|-------|---|----|----|-----|-------|-------|-------|-------|--------|-------|----|-----|------|-------|------|
| P13804 | Electron transfer flavoprotein subunit alpha, mitochondrial OS=Homo sapiens GN=ETFFA PE=1 SV=1 - [ETFFA_HUMAN] | 45.65 | 1 | 13 | 13 | 71  | 0.987 | 1.059 | 0.786 | 1.110 | 141.97 | 45.65 | 20 | 71  | 333  | 35.1  | 8.38 |
| Q9H4L5 | Oxysterol-binding protein-related protein 3 OS=Homo sapiens GN=OSBP3 PE=1 SV=1 - [OSBP3_HUMAN]                 | 6.99  | 1 | 5  | 5  | 11  | 0.862 | 1.482 | 0.931 | 1.110 | 27.32  | 6.99  | 7  | 11  | 887  | 101.2 | 6.87 |
| Q8TDN6 | Ribosome biogenesis protein BRX1 homolog OS=Homo sapiens GN=BRX1 PE=1 SV=2 - [BRX1_HUMAN]                      | 12.75 | 1 | 5  | 5  | 35  | 0.919 | 0.907 | 0.851 | 1.111 | 73.27  | 12.75 | 7  | 35  | 353  | 41.4  | 9.92 |
| P54105 | Methylosome subunit pICln OS=Homo sapiens GN=CLNS1A PE=1 SV=1 - [ICLN_HUMAN]                                   | 23.63 | 1 | 3  | 3  | 21  | 0.880 | 0.873 | 1.092 | 1.111 | 44.33  | 23.63 | 5  | 21  | 237  | 26.2  | 4.11 |
| O95071 | E3 ubiquitin-protein ligase UBR5 OS=Homo sapiens GN=UBR5 PE=1 SV=2 - [UBR5_HUMAN]                              | 2.97  | 1 | 6  | 7  | 10  | 0.598 | 0.984 | 0.943 | 1.111 | 16.41  | 2.97  | 7  | 10  | 2799 | 309.2 | 5.85 |
| Q9Y4F1 | FERM, RhoGEF and plectstrin domain-containing protein 1 OS=Homo sapiens GN=FARP1 PE=1 SV=1 - [FARP1_HUMAN]     | 28.33 | 1 | 23 | 24 | 101 | 1.846 | 1.096 | 1.092 | 1.111 | 255.65 | 28.33 | 36 | 101 | 1045 | 118.6 | 8.15 |
| Q9BSH4 | Translational activator of cytochrome c oxidase 1 OS=Homo sapiens GN=TACO1 PE=1 SV=1 - [TACO1_HUMAN]           | 14.48 | 1 | 2  | 2  | 4   | 1.039 | 0.960 | 0.621 | 1.111 | 14.33  | 14.48 | 2  | 4   | 297  | 32.5  | 8.13 |
| P49407 | Beta-arrestin-1 OS=Homo sapiens GN=ARRB1 PE=1 SV=2 - [ARRB1_HUMAN]                                             | 17.22 | 4 | 7  | 7  | 21  | 1.674 | 1.264 | 1.382 | 1.111 | 49.53  | 17.22 | 11 | 21  | 418  | 47.0  | 6.20 |

|        |                                                                                                                                                                      |       |   |    |    |     |       |       |       |       |        |       |    |     |      |       |       |
|--------|----------------------------------------------------------------------------------------------------------------------------------------------------------------------|-------|---|----|----|-----|-------|-------|-------|-------|--------|-------|----|-----|------|-------|-------|
| P60510 | Serine/threonine-protein phosphatase 4 catalytic subunit<br>OS=Homo sapiens<br>GN=PPP4C<br>PE=1 SV=1 - [PP4C_HUMAN]<br>Thyroid hormone receptor-associated protein 3 | 14.01 | 1 | 3  | 3  | 16  | 0.925 | 1.011 | 1.015 | 1.111 | 48.43  | 14.01 | 6  | 16  | 307  | 35.1  | 5.06  |
| Q9Y2W1 | OS=Homo sapiens<br>GN=THRAP3<br>PE=1 SV=2 - [TR150_HUMAN]                                                                                                            | 22.20 | 1 | 21 | 21 | 105 | 1.189 | 1.218 | 1.065 | 1.111 | 282.36 | 22.20 | 31 | 105 | 955  | 108.6 | 10.15 |
| P10155 | 60 kDa SS-A/Ro ribonucleoprotein<br>OS=Homo sapiens<br>GN=TROVE2<br>PE=1 SV=2 - [RO60_HUMAN]                                                                         | 33.46 | 1 | 18 | 18 | 62  | 1.124 | 0.958 | 0.920 | 1.111 | 158.38 | 33.46 | 28 | 62  | 538  | 60.6  | 8.03  |
| P53814 | Smoothelin<br>OS=Homo sapiens<br>GN=SMTN<br>PE=1 SV=7 - [SMTN_HUMAN]                                                                                                 | 31.19 | 1 | 24 | 24 | 94  | 0.930 | 1.258 | 2.599 | 1.112 | 217.95 | 31.19 | 40 | 94  | 917  | 99.0  | 9.07  |
| Q14139 | Ubiquitin conjugation factor E4 A<br>OS=Homo sapiens<br>GN=UBE4A<br>PE=1 SV=2 - [UBE4A_HUMAN]                                                                        | 8.26  | 1 | 6  | 7  | 35  | 1.087 | 1.024 | 1.202 | 1.112 | 94.07  | 8.26  | 12 | 35  | 1066 | 122.5 | 5.24  |
| O75586 | Mediator of RNA polymerase II transcription subunit 6<br>OS=Homo sapiens<br>GN=MED6<br>PE=1 SV=2 - [MED6_HUMAN]                                                      | 6.50  | 1 | 2  | 2  | 3   | 0.785 | 1.094 | 0.833 | 1.112 | 6.61   | 6.50  | 3  | 3   | 246  | 28.4  | 8.62  |
| Q9LJY5 | ADP-ribosylation factor-binding protein GGA1<br>OS=Homo sapiens<br>GN=GGA1<br>PE=1 SV=1 - [GGA1_HUMAN]                                                               | 8.61  | 1 | 4  | 4  | 14  | 0.928 | 0.979 | 1.080 | 1.112 | 40.07  | 8.61  | 6  | 14  | 639  | 70.3  | 5.29  |
| Q96MT8 | Centrosomal protein of 63 kDa<br>OS=Homo sapiens<br>GN=CEP63<br>PE=1 SV=1 - [CEP63_HUMAN]                                                                            | 2.70  | 1 | 2  | 3  | 7   | 0.862 | 0.561 | 0.692 | 1.112 | 15.38  | 2.70  | 3  | 7   | 703  | 81.3  | 6.13  |

|        |                                                                                                                      |       |   |    |    |    |       |       |       |       |        |       |    |    |      |       |      |
|--------|----------------------------------------------------------------------------------------------------------------------|-------|---|----|----|----|-------|-------|-------|-------|--------|-------|----|----|------|-------|------|
| Q9NPA0 | ER membrane protein complex subunit 7<br>OS=Homo sapiens<br>GN=EMC7<br>PE=1 SV=1 - [EMC7_HUMAN]                      | 19.42 | 1 | 4  | 4  | 12 | 1.136 | 0.924 | 0.877 | 1.112 | 30.94  | 19.42 | 6  | 12 | 242  | 26.5  | 9.25 |
| P49590 | Probable histidine--tRNA ligase, mitochondrial<br>OS=Homo sapiens<br>GN=HARS2<br>PE=1 SV=1 - [SYHM_HUMAN]            | 22.33 | 2 | 5  | 12 | 27 | 1.457 | 1.186 | 1.103 | 1.112 | 55.42  | 22.33 | 18 | 27 | 506  | 56.9  | 8.24 |
| Q96L93 | Kinesin-like protein KIF16B<br>OS=Homo sapiens<br>GN=KIF16B<br>PE=1 SV=2 - [KI16B_HUMAN]                             | 6.30  | 2 | 6  | 8  | 10 | 1.849 | 0.826 | 1.155 | 1.112 | 23.06  | 6.30  | 9  | 10 | 1317 | 151.9 | 6.16 |
| Q9NP66 | High mobility group protein 20A<br>OS=Homo sapiens<br>GN=HMG20A<br>PE=1 SV=1 - [HM20A_HUMAN]                         | 15.85 | 1 | 5  | 5  | 9  | 1.062 | 1.296 | 1.030 | 1.112 | 22.98  | 15.85 | 7  | 9  | 347  | 40.1  | 6.49 |
| Q6NUK1 | Calcium-binding mitochondrial carrier protein SCaMC-1<br>OS=Homo sapiens<br>GN=SLC25A24<br>PE=1 SV=2 - [SCMC1_HUMAN] | 37.11 | 1 | 22 | 22 | 73 | 1.494 | 1.344 | 0.921 | 1.112 | 186.65 | 37.11 | 34 | 73 | 477  | 53.3  | 6.33 |
| Q9UI10 | Translation initiation factor eIF-2B subunit delta<br>OS=Homo sapiens<br>GN=EIF2B4<br>PE=1 SV=2 - [EI2BD_HUMAN]      | 18.93 | 1 | 8  | 8  | 31 | 1.119 | 1.000 | 1.019 | 1.112 | 94.14  | 18.93 | 13 | 31 | 523  | 57.5  | 9.38 |
| Q7Z404 | Transmembrane channel-like protein 4<br>OS=Homo sapiens<br>GN=TMC4<br>PE=2 SV=3 - [TMC4_HUMAN]                       | 3.23  | 1 | 2  | 2  | 5  | 0.966 | 1.323 | 1.483 | 1.113 | 1.65   | 3.23  | 2  | 5  | 712  | 79.2  | 8.94 |
| Q8IWW7 | E3 ubiquitin-protein ligase UBR1<br>OS=Homo sapiens<br>GN=UBR1<br>PE=1 SV=1 - [UBR1_HUMAN]                           | 6.00  | 1 | 7  | 7  | 20 | 0.984 | 1.127 | 1.215 | 1.113 | 49.82  | 6.00  | 11 | 20 | 1749 | 200.1 | 6.01 |
| Q8NHV4 | Protein NEDD1<br>OS=Homo sapiens<br>GN=NEDD1<br>PE=1 SV=1 - [NEDD1_HUMAN]                                            | 10.30 | 1 | 5  | 5  | 12 | 0.897 | 1.206 | 0.785 | 1.113 | 33.76  | 10.30 | 7  | 12 | 660  | 71.9  | 7.97 |

|        |                                                                                                                    |       |   |    |    |    |       |       |       |       |       |       |    |    |     |      |      |
|--------|--------------------------------------------------------------------------------------------------------------------|-------|---|----|----|----|-------|-------|-------|-------|-------|-------|----|----|-----|------|------|
| P63218 | Guanine nucleotide-binding protein G(I)/G(S)/G(O) subunit gamma-5 OS=Homo sapiens GN=GNG5 PE=1 SV=3 - [GBG5_HUMAN] | 23.53 | 1 | 2  | 2  | 7  | 1.240 | 0.717 | 0.742 | 1.113 | 14.08 | 23.53 | 3  | 7  | 68  | 7.3  | 9.85 |
| Q9H469 | F-box/LRR-repeat protein 15 OS=Homo sapiens GN=FBXL15 PE=1 SV=2 - [FXL15_HUMAN]                                    | 4.33  | 1 | 1  | 1  | 1  | 1.049 | 0.663 | 1.022 | 1.113 | 0.00  | 4.33  | 1  | 1  | 300 | 33.0 | 7.44 |
| P49137 | MAP kinase-activated protein kinase 2 OS=Homo sapiens GN=MAPKAPK2 PE=1 SV=1 - [MAPK2_HUMAN]                        | 24.25 | 3 | 10 | 10 | 19 | 1.628 | 1.364 | 1.014 | 1.113 | 45.04 | 24.25 | 13 | 19 | 400 | 45.5 | 8.68 |
| Q15910 | Histone-lysine N-methyltransferase EZH2 OS=Homo sapiens GN=EZH2 PE=1 SV=2 - [EZH2_HUMAN]                           | 1.74  | 2 | 1  | 1  | 2  | 1.289 | 0.680 | 0.861 | 1.113 | 0.00  | 1.74  | 1  | 2  | 746 | 85.3 | 7.02 |
| Q9Y2S6 | Translation machinery-associated protein 7 OS=Homo sapiens GN=TMA7 PE=1 SV=1 - [TMA7_HUMAN]                        | 53.13 | 1 | 4  | 5  | 17 | 0.736 | 1.353 | 1.099 | 1.113 | 24.82 | 53.13 | 7  | 17 | 64  | 7.1  | 9.99 |
| Q8N3R9 | MAGUK p55 subfamily member 5 OS=Homo sapiens GN=MPP5 PE=1 SV=3 - [MPP5_HUMAN]                                      | 14.37 | 1 | 9  | 9  | 18 | 1.141 | 1.052 | 1.243 | 1.113 | 44.58 | 14.37 | 13 | 18 | 675 | 77.2 | 6.14 |
| Q15041 | ADP-ribosylation factor-like protein 6-interacting protein 1 OS=Homo sapiens GN=ARL6IP1 PE=1 SV=2 - [ARGP1_HUMAN]  | 7.88  | 1 | 1  | 2  | 5  | 1.528 | 1.063 | 0.491 | 1.114 | 9.65  | 7.88  | 3  | 5  | 203 | 23.3 | 9.32 |
| P22033 | Methylmalonyl-CoA mutase, mitochondrial OS=Homo sapiens GN=MUT PE=1 SV=4 - [MUTA_HUMAN]                            | 18.80 | 1 | 12 | 12 | 30 | 0.944 | 1.308 | 1.189 | 1.114 | 82.16 | 18.80 | 21 | 30 | 750 | 83.1 | 6.93 |

|        |                                                                                                             |       |   |    |    |     |       |       |       |       |        |       |    |     |      |       |      |
|--------|-------------------------------------------------------------------------------------------------------------|-------|---|----|----|-----|-------|-------|-------|-------|--------|-------|----|-----|------|-------|------|
| P23368 | NAD-dependent malic enzyme, mitochondrial<br>OS=Homo sapiens<br>GN=ME2 PE=1<br>SV=1 - [MAOM_HUMAN]          | 19.52 | 1 | 9  | 10 | 54  | 0.881 | 1.542 | 1.226 | 1.114 | 129.62 | 19.52 | 17 | 54  | 584  | 65.4  | 7.61 |
| Q08357 | Sodium-dependent phosphate transporter 2<br>OS=Homo sapiens<br>GN=SLC20A2<br>PE=1 SV=1 - [S20A2_HUMAN]      | 5.83  | 1 | 3  | 3  | 8   | 1.047 | 1.103 | 0.738 | 1.114 | 16.42  | 5.83  | 4  | 8   | 652  | 70.3  | 6.54 |
| Q9P2W9 | Syntaxin-18<br>OS=Homo sapiens<br>GN=STX18<br>PE=1 SV=1 - [STX18_HUMAN]                                     | 6.57  | 1 | 2  | 2  | 5   | 1.474 | 1.006 | 1.232 | 1.114 | 13.75  | 6.57  | 3  | 5   | 335  | 38.6  | 5.49 |
| Q12931 | Heat shock protein 75 kDa, mitochondrial<br>OS=Homo sapiens<br>GN=TRAP1<br>PE=1 SV=3 - [TRAP1_HUMAN]        | 30.11 | 1 | 19 | 20 | 175 | 0.802 | 1.147 | 1.043 | 1.114 | 483.14 | 30.11 | 34 | 175 | 704  | 80.1  | 8.21 |
| Q9NR97 | Toll-like receptor 8<br>OS=Homo sapiens<br>GN=TLR8 PE=1<br>SV=1 - [TLR8_HUMAN]                              | 0.67  | 1 | 1  | 1  | 1   | 1.338 | 1.267 | 0.970 | 1.114 | 1.88   | 0.67  | 1  | 1   | 1041 | 119.8 | 6.65 |
| Q6ZTY8 | Putative uncharacterized protein C12orf63<br>OS=Homo sapiens<br>GN=C12orf63<br>PE=2 SV=2 - [C12orf63_HUMAN] | 2.76  | 1 | 2  | 3  | 3   | 0.271 | 0.119 | 0.164 | 1.114 | 4.71   | 2.76  | 3  | 3   | 1197 | 135.7 | 8.03 |
| Q96CN5 | Leucine-rich repeat-containing protein 45<br>OS=Homo sapiens<br>GN=LRR45<br>PE=1 SV=1 - [LRR45_HUMAN]       | 5.22  | 1 | 3  | 3  | 4   | 1.123 | 0.773 | 1.096 | 1.114 | 6.24   | 5.22  | 3  | 4   | 670  | 75.9  | 6.23 |
| Q9Y2R5 | 28S ribosomal protein S17, mitochondrial<br>OS=Homo sapiens<br>GN=MRPS17<br>PE=2 SV=1 - [RT17_HUMAN]        | 15.38 | 1 | 2  | 2  | 4   | 1.109 | 0.746 | 1.074 | 1.114 | 10.42  | 15.38 | 2  | 4   | 130  | 14.5  | 9.85 |

|        |                                                                                                                   |       |   |    |    |     |       |       |       |       |        |       |    |     |     |      |      |
|--------|-------------------------------------------------------------------------------------------------------------------|-------|---|----|----|-----|-------|-------|-------|-------|--------|-------|----|-----|-----|------|------|
| P45973 | Chromobox protein homolog 5<br>OS=Homo sapiens<br>GN=CBX5<br>PE=1 SV=1 - [CBX5_HUMAN]                             | 42.41 | 1 | 8  | 8  | 29  | 1.004 | 1.086 | 0.743 | 1.114 | 84.92  | 42.41 | 12 | 29  | 191 | 22.2 | 5.86 |
| Q5TFE4 | 5'-nucleotidase domain-containing protein 1<br>OS=Homo sapiens<br>GN=NT5DC1<br>PE=1 SV=1 - [NT5D1_HUMAN]          | 29.01 | 1 | 13 | 13 | 28  | 1.755 | 1.117 | 1.135 | 1.114 | 64.23  | 29.01 | 17 | 28  | 455 | 51.8 | 6.35 |
| P33908 | Mannosyl-oligosaccharide 1,2-alpha-mannosidase IA<br>OS=Homo sapiens<br>GN=MAN1A1<br>PE=1 SV=3 - [MA1A1_HUMAN]    | 15.31 | 2 | 6  | 9  | 27  | 1.456 | 0.996 | 0.884 | 1.115 | 70.78  | 15.31 | 12 | 27  | 653 | 72.9 | 6.47 |
| Q9P031 | Thyroid transcription factor 1-associated protein 26<br>OS=Homo sapiens<br>GN=CCDC59<br>PE=1 SV=2 - [TAP26_HUMAN] | 3.73  | 1 | 1  | 1  | 1   | 0.910 | 0.938 | 2.191 | 1.115 | 3.49   | 3.73  | 1  | 1   | 241 | 28.7 | 9.88 |
| Q13144 | Translation initiation factor eIF-2B subunit epsilon<br>OS=Homo sapiens<br>GN=EIF2B5<br>PE=1 SV=3 - [EI2BE_HUMAN] | 7.21  | 1 | 4  | 4  | 20  | 1.343 | 1.255 | 1.084 | 1.115 | 48.02  | 7.21  | 7  | 20  | 721 | 80.3 | 5.08 |
| P55084 | Trifunctional enzyme subunit beta, mitochondrial<br>OS=Homo sapiens<br>GN=HADHB<br>PE=1 SV=3 - [ECHB_HUMAN]       | 57.38 | 1 | 27 | 29 | 201 | 1.003 | 1.197 | 0.956 | 1.115 | 444.98 | 57.38 | 48 | 201 | 474 | 51.3 | 9.41 |
| Q9UMR3 | T-box transcription factor TBX20<br>OS=Homo sapiens<br>GN=TBX20<br>PE=1 SV=4 - [TBX20_HUMAN]                      | 10.29 | 1 | 2  | 2  | 2   | 1.062 | 0.714 | 1.142 | 1.115 | 2.92   | 10.29 | 2  | 2   | 447 | 49.2 | 7.71 |
| Q4KMP7 | TBC1 domain family member 10B<br>OS=Homo sapiens<br>GN=TBC1D10B<br>PE=1 SV=3 - [TB10B_HUMAN]                      | 9.03  | 1 | 5  | 5  | 21  | 1.090 | 1.260 | 1.047 | 1.115 | 47.89  | 9.03  | 9  | 21  | 808 | 87.1 | 9.19 |

|        |                                                                                                              |       |   |    |    |    |       |       |       |       |       |       |    |    |      |       |      |
|--------|--------------------------------------------------------------------------------------------------------------|-------|---|----|----|----|-------|-------|-------|-------|-------|-------|----|----|------|-------|------|
| Q7Z4L5 | Tetratricopeptide repeat protein 21B<br>OS=Homo sapiens<br>GN=TTC21B<br>PE=1 SV=2 - [TTC21B_HUMAN]           | 4.79  | 1 | 3  | 6  | 7  | 1.098 | 0.963 | 0.853 | 1.115 | 14.99 | 4.79  | 6  | 7  | 1316 | 150.8 | 6.96 |
| Q14651 | Plastin-1<br>OS=Homo sapiens<br>GN=PLS1 PE=1 SV=2 - [PLS1_HUMAN]                                             | 9.22  | 1 | 1  | 6  | 36 | 1.179 | 0.829 | 1.166 | 1.116 | 96.31 | 9.22  | 10 | 36 | 629  | 70.2  | 5.41 |
| Q15397 | Pumilio domain-containing protein KIAA0020<br>OS=Homo sapiens<br>GN=KIAA0020<br>PE=1 SV=3 - [K0020_HUMAN]    | 14.51 | 2 | 10 | 10 | 18 | 0.922 | 0.886 | 0.833 | 1.116 | 47.76 | 14.51 | 15 | 18 | 648  | 73.5  | 9.64 |
| Q8IWZ8 | SURP and G-patch domain-containing protein 1<br>OS=Homo sapiens<br>GN=SUGP1<br>PE=1 SV=2 - [SUGP1_HUMAN]     | 1.71  | 1 | 1  | 1  | 1  | 1.012 | 0.883 | 0.963 | 1.116 | 2.36  | 1.71  | 1  | 1  | 645  | 72.4  | 7.61 |
| Q16186 | Proteasomal ubiquitin receptor ADRM1<br>OS=Homo sapiens<br>GN=ADRM1<br>PE=1 SV=2 - [ADRM1_HUMAN]             | 2.70  | 1 | 1  | 1  | 3  | 0.998 | 1.172 | 1.043 | 1.116 | 2.76  | 2.70  | 2  | 3  | 407  | 42.1  | 5.07 |
| P46199 | Translation initiation factor IF-2, mitochondrial<br>OS=Homo sapiens<br>GN=MTIF2<br>PE=1 SV=2 - [IF2M_HUMAN] | 3.44  | 1 | 2  | 3  | 8  | 1.069 | 1.156 | 1.000 | 1.116 | 23.36 | 3.44  | 4  | 8  | 727  | 81.3  | 7.15 |
| Q8NCM8 | Cytoplasmic dynein 2 heavy chain 1<br>OS=Homo sapiens<br>GN=DYNC2H1<br>PE=1 SV=4 - [DYHC2_HUMAN]             | 2.65  | 2 | 9  | 12 | 26 | 1.024 | 0.976 | 1.072 | 1.116 | 38.72 | 2.65  | 14 | 26 | 4307 | 492.3 | 6.54 |
| Q9UPU5 | Ubiquitin carboxyl-terminal hydrolase 24<br>OS=Homo sapiens<br>GN=USP24<br>PE=1 SV=3 - [UBP24_HUMAN]         | 4.31  | 1 | 8  | 10 | 26 | 1.013 | 1.007 | 1.216 | 1.116 | 73.90 | 4.31  | 15 | 26 | 2620 | 294.2 | 6.14 |



|        |                                                                                                                            |       |   |    |    |    |       |       |       |       |        |       |    |    |     |      |      |
|--------|----------------------------------------------------------------------------------------------------------------------------|-------|---|----|----|----|-------|-------|-------|-------|--------|-------|----|----|-----|------|------|
| P62072 | Mitochondrial import inner membrane translocase subunit Tim10<br>OS=Homo sapiens<br>GN=TIMM10<br>PE=1 SV=1 - [TIM10_HUMAN] | 53.33 | 1 | 5  | 5  | 25 | 0.898 | 0.989 | 0.744 | 1.116 | 78.96  | 53.33 | 9  | 25 | 90  | 10.3 | 6.29 |
| P43405 | Tyrosine-protein kinase SYK<br>OS=Homo sapiens<br>GN=SYK<br>PE=1 SV=1 - [KSYK_HUMAN]                                       | 2.36  | 1 | 1  | 1  | 1  | 1.551 | 1.012 | 1.030 | 1.117 | 1.67   | 2.36  | 1  | 1  | 635 | 72.0 | 8.25 |
| O60826 | Coiled-coil domain-containing protein 22<br>OS=Homo sapiens<br>GN=CCDC22<br>PE=1 SV=1 - [CCDC22_HUMAN]                     | 24.08 | 1 | 13 | 13 | 45 | 1.065 | 0.923 | 1.037 | 1.117 | 112.89 | 24.08 | 21 | 45 | 627 | 70.7 | 6.74 |
| P83111 | Serine beta-lactamase-like protein LACTB, mitochondrial<br>OS=Homo sapiens<br>GN=LACTB<br>PE=1 SV=2 - [LACTB_HUMAN]        | 18.65 | 1 | 10 | 10 | 55 | 0.980 | 0.924 | 0.913 | 1.117 | 135.62 | 18.65 | 18 | 55 | 547 | 60.7 | 8.53 |
| Q96KA5 | Cleft lip and palate transmembrane protein 1-like<br>OS=Homo sapiens<br>GN=CLPTM1L<br>PE=1 SV=1 - [CLP1L_HUMAN]            | 13.38 | 1 | 5  | 5  | 9  | 0.904 | 0.629 | 0.809 | 1.117 | 28.38  | 13.38 | 7  | 9  | 538 | 62.2 | 8.56 |
| Q9UBU6 | Protein FAM8A1<br>OS=Homo sapiens<br>GN=FAM8A1<br>PE=1 SV=1 - [FA8A1_HUMAN]                                                | 7.51  | 1 | 2  | 2  | 4  | 0.944 | 1.436 | 2.192 | 1.117 | 9.56   | 7.51  | 3  | 4  | 413 | 44.1 | 7.21 |
| O43920 | NADH dehydrogenase [ubiquinone] iron-sulfur protein 5<br>OS=Homo sapiens<br>GN=NDUFS5<br>PE=1 SV=3 - [NDUSS_HUMAN]         | 61.32 | 1 | 6  | 6  | 26 | 0.708 | 0.714 | 0.717 | 1.117 | 61.84  | 61.32 | 12 | 26 | 106 | 12.5 | 9.14 |
| Q92643 | GPI-anchor transamidase<br>OS=Homo sapiens<br>GN=PIGK<br>PE=1 SV=2 - [GP18_HUMAN]                                          | 6.84  | 1 | 2  | 2  | 5  | 1.235 | 0.990 | 0.638 | 1.117 | 8.06   | 6.84  | 3  | 5  | 395 | 45.2 | 6.16 |

|        |                                                                                                                          |       |   |    |    |     |       |       |       |       |        |       |    |     |     |      |      |
|--------|--------------------------------------------------------------------------------------------------------------------------|-------|---|----|----|-----|-------|-------|-------|-------|--------|-------|----|-----|-----|------|------|
| P09622 | Dihydropyridine dehydrogenase, mitochondrial<br>OS=Homo sapiens<br>GN=DLD PE=1 SV=2 - [DLDH_HUMAN]                       | 34.77 | 1 | 13 | 13 | 132 | 0.961 | 1.308 | 1.120 | 1.117 | 307.66 | 34.77 | 23 | 132 | 509 | 54.1 | 7.85 |
| Q96EY8 | Cob(II)yrinic acid a,c-diamide adenosyltransferase, mitochondrial<br>OS=Homo sapiens<br>GN=MMAB PE=1 SV=1 - [MMAB_HUMAN] | 16.80 | 1 | 3  | 3  | 11  | 1.036 | 0.895 | 1.075 | 1.117 | 36.60  | 16.80 | 4  | 11  | 250 | 27.4 | 8.60 |
| Q15759 | Mitogen-activated protein kinase 11<br>OS=Homo sapiens<br>GN=MAPK11 PE=1 SV=2 - [MK11_HUMAN]                             | 6.04  | 3 | 1  | 2  | 4   | 1.573 | 1.047 | 1.059 | 1.117 | 8.83   | 6.04  | 3  | 4   | 364 | 41.3 | 5.83 |
| Q5TC12 | ATP synthase mitochondrial F1 complex assembly factor 1<br>OS=Homo sapiens<br>GN=ATPAF1 PE=1 SV=1 - [ATPF1_HUMAN]        | 1.83  | 1 | 1  | 1  | 2   | 0.874 | 1.176 | 0.962 | 1.118 | 4.42   | 1.83  | 1  | 2   | 328 | 36.4 | 7.96 |
| Q9Y697 | Cysteine desulfurase, mitochondrial<br>OS=Homo sapiens<br>GN=NFS1 PE=1 SV=3 - [NFS1_HUMAN]                               | 14.66 | 1 | 7  | 7  | 19  | 1.040 | 1.158 | 1.186 | 1.118 | 44.11  | 14.66 | 12 | 19  | 457 | 50.2 | 8.31 |
| P08754 | Guanine nucleotide-binding protein G(k) subunit alpha<br>OS=Homo sapiens<br>GN=GNAI3 PE=1 SV=3 - [GNAI3_HUMAN]           | 41.24 | 4 | 5  | 14 | 104 | 0.862 | 0.852 | 0.621 | 1.118 | 270.23 | 41.24 | 25 | 104 | 354 | 40.5 | 5.69 |
| Q96HS1 | Serine/threonine-protein phosphatase PGAM5, mitochondrial<br>OS=Homo sapiens<br>GN=PGAM5 PE=1 SV=2 - [PGAM5_HUMAN]       | 25.95 | 2 | 9  | 9  | 32  | 1.021 | 1.130 | 0.971 | 1.118 | 70.84  | 25.95 | 14 | 32  | 289 | 32.0 | 8.68 |
| Q14240 | Eukaryotic initiation factor 4A-II<br>OS=Homo sapiens<br>GN=EIF4A2 PE=1 SV=2 - [IF4A2_HUMAN]                             | 51.84 | 1 | 8  | 21 | 277 | 1.041 | 1.054 | 1.183 | 1.118 | 682.40 | 51.84 | 35 | 277 | 407 | 46.4 | 5.48 |

|        |                                                                                                             |       |   |    |    |    |       |       |       |       |        |       |    |    |      |       |      |
|--------|-------------------------------------------------------------------------------------------------------------|-------|---|----|----|----|-------|-------|-------|-------|--------|-------|----|----|------|-------|------|
| Q9UG63 | ATP-binding cassette sub-family F member 2<br>OS=Homo sapiens<br>GN=ABCF2<br>PE=1 SV=2 - [ABCF2_HUMAN]      | 27.77 | 1 | 15 | 15 | 52 | 0.974 | 0.883 | 0.978 | 1.118 | 124.86 | 27.77 | 26 | 52 | 623  | 71.2  | 7.37 |
| P54315 | Inactive pancreatic lipase-related protein 1<br>OS=Homo sapiens<br>GN=PNLIPRP1<br>PE=1 SV=1 - [LIPR1_HUMAN] | 3.64  | 1 | 1  | 1  | 1  | 2.960 | 1.821 | 0.953 | 1.118 | 2.83   | 3.64  | 1  | 1  | 467  | 51.8  | 5.73 |
| P28799 | Granulins<br>OS=Homo sapiens<br>GN=GRN PE=1 SV=2 - [GRN_HUMAN]                                              | 10.62 | 1 | 6  | 6  | 15 | 1.024 | 0.917 | 1.292 | 1.118 | 41.70  | 10.62 | 8  | 15 | 593  | 63.5  | 6.83 |
| Q6P2E9 | Enhancer of mRNA-decapping protein 4<br>OS=Homo sapiens<br>GN=EDC4<br>PE=1 SV=1 - [EDC4_HUMAN]              | 13.99 | 3 | 16 | 17 | 49 | 0.944 | 0.967 | 1.029 | 1.118 | 118.23 | 13.99 | 30 | 49 | 1401 | 151.6 | 5.86 |
| Q9HD67 | Unconventional myosin-X<br>OS=Homo sapiens<br>GN=MYO10<br>PE=1 SV=3 - [MYO10_HUMAN]                         | 3.64  | 1 | 4  | 4  | 13 | 0.712 | 0.649 | 0.504 | 1.119 | 16.07  | 3.64  | 5  | 13 | 2058 | 237.2 | 6.21 |
| P20933 | N(4)-(beta-N-acetylglucosaminyl)-L-asparaginase<br>OS=Homo sapiens<br>GN=AGA PE=1 SV=2 - [ASPG_HUMAN]       | 13.01 | 1 | 4  | 4  | 13 | 0.529 | 1.219 | 1.102 | 1.119 | 37.08  | 13.01 | 6  | 13 | 346  | 37.2  | 6.28 |
| Q9H2W6 | 39S ribosomal protein L46, mitochondrial<br>OS=Homo sapiens<br>GN=MRPL46<br>PE=1 SV=1 - [RM46_HUMAN]        | 12.90 | 1 | 3  | 3  | 12 | 1.068 | 1.519 | 1.175 | 1.119 | 38.66  | 12.90 | 6  | 12 | 279  | 31.7  | 7.05 |
| Q9UHR5 | SAP30-binding protein<br>OS=Homo sapiens<br>GN=SAP30BP<br>PE=1 SV=1 - [S30BP_HUMAN]                         | 26.62 | 1 | 6  | 6  | 10 | 0.922 | 0.995 | 0.882 | 1.119 | 34.87  | 26.62 | 9  | 10 | 308  | 33.8  | 4.84 |
| P11802 | Cyclin-dependent kinase 4<br>OS=Homo sapiens<br>GN=CDK4<br>PE=1 SV=2 - [CDK4_HUMAN]                         | 17.16 | 6 | 3  | 4  | 17 | 1.214 | 1.213 | 1.135 | 1.119 | 33.16  | 17.16 | 5  | 17 | 303  | 33.7  | 7.01 |

|        |                                                                                                           |       |   |    |    |     |              |       |       |       |         |       |    |     |     |       |      |
|--------|-----------------------------------------------------------------------------------------------------------|-------|---|----|----|-----|--------------|-------|-------|-------|---------|-------|----|-----|-----|-------|------|
| Q6IA86 | Elongator complex protein 2<br>OS=Homo sapiens<br>GN=ELP2 PE=1 SV=2 - [ELP2_HUMAN]                        | 0.97  | 1 | 1  | 1  | 5   | 0.491        | 1.033 | 0.853 | 1.119 | 5.76    | 0.97  | 2  | 5   | 826 | 92.4  | 5.96 |
| Q13114 | TNF receptor-associated factor 3<br>OS=Homo sapiens<br>GN=TRAF3 PE=1 SV=2 - [TRAF3_HUMAN]                 | 3.52  | 1 | 2  | 2  | 4   | 0.912        | 1.128 | 1.142 | 1.119 | 7.87    | 3.52  | 2  | 4   | 568 | 64.4  | 7.91 |
| P37802 | Transgelin-2<br>OS=Homo sapiens<br>GN=TAGLN2 PE=1 SV=3 - [TAGLN2_HUMAN]                                   | 85.43 | 1 | 20 | 21 | 670 | <b>1.584</b> | 0.912 | 1.021 | 1.119 | 1600.81 | 85.43 | 36 | 670 | 199 | 22.4  | 8.25 |
| Q9UGR2 | Zinc finger CCH domain-containing protein 7B<br>OS=Homo sapiens<br>GN=ZC3H7B PE=1 SV=1 - [Z3H7B_HUMAN]    | 11.18 | 1 | 8  | 9  | 20  | 1.153        | 0.743 | 0.915 | 1.119 | 43.79   | 11.18 | 13 | 20  | 993 | 111.5 | 7.17 |
| O43760 | Synaptogyrin-2<br>OS=Homo sapiens<br>GN=SYNGR2 PE=1 SV=1 - [SNG2_HUMAN]                                   | 3.57  | 1 | 1  | 1  | 1   | 1.138        | 0.932 | 0.850 | 1.119 | 2.09    | 3.57  | 1  | 1   | 224 | 24.8  | 4.94 |
| Q86WB0 | Nuclear-interacting partner of ALK<br>OS=Homo sapiens<br>GN=ZC3HC1 PE=1 SV=1 - [NIPA_HUMAN]               | 11.35 | 1 | 4  | 4  | 8   | 1.277        | 0.936 | 0.686 | 1.120 | 8.21    | 11.35 | 5  | 8   | 502 | 55.2  | 5.62 |
| Q2TAY7 | WD40 repeat-containing protein SMU1<br>OS=Homo sapiens<br>GN=SMU1 PE=1 SV=2 - [SMU1_HUMAN]                | 14.23 | 1 | 6  | 6  | 24  | 1.056        | 1.107 | 0.792 | 1.120 | 42.96   | 14.23 | 11 | 24  | 513 | 57.5  | 7.18 |
| Q92917 | G patch domain and KOW motifs-containing protein<br>OS=Homo sapiens<br>GN=GPKOW PE=1 SV=2 - [GPKOW_HUMAN] | 13.87 | 1 | 6  | 6  | 13  | 1.298        | 1.255 | 1.099 | 1.120 | 25.67   | 13.87 | 8  | 13  | 476 | 52.2  | 6.15 |
| Q6UN15 | Pre-mRNA 3'-end-processing factor FIP1<br>OS=Homo sapiens<br>GN=FIP1L1 PE=1 SV=1 - [FIP1_HUMAN]           | 10.27 | 1 | 4  | 4  | 14  | 1.048        | 1.073 | 1.017 | 1.120 | 24.06   | 10.27 | 6  | 14  | 594 | 66.5  | 5.59 |

|        |                                                                                                                                   |       |   |    |    |     |       |       |       |       |        |       |    |     |      |       |      |
|--------|-----------------------------------------------------------------------------------------------------------------------------------|-------|---|----|----|-----|-------|-------|-------|-------|--------|-------|----|-----|------|-------|------|
| Q14767 | Latent-transforming growth factor beta-binding protein 2<br>OS=Homo sapiens<br>GN=LTBP2<br>PE=1 SV=3 - [LTBP2_HUMAN]              | 3.19  | 1 | 4  | 4  | 20  | 0.452 | 1.185 | 1.423 | 1.120 | 50.11  | 3.19  | 8  | 20  | 1821 | 194.9 | 5.19 |
| P36021 | Monocarboxylate transporter 8<br>OS=Homo sapiens<br>GN=SLC16A2<br>PE=1 SV=2 - [MOT8_HUMAN]                                        | 2.41  | 1 | 1  | 1  | 15  | 2.007 | 1.025 | 1.268 | 1.120 | 46.19  | 2.41  | 2  | 15  | 539  | 59.5  | 5.59 |
| P57772 | Selenocysteine-specific elongation factor<br>OS=Homo sapiens<br>GN=EEFSEC<br>PE=1 SV=4 - [SELB_HUMAN]                             | 5.54  | 1 | 2  | 2  | 8   | 1.705 | 1.355 | 0.956 | 1.120 | 22.84  | 5.54  | 4  | 8   | 596  | 65.3  | 8.35 |
| P11940 | Polyadenylate-binding protein 1<br>OS=Homo sapiens<br>GN=PABPC1<br>PE=1 SV=2 - [PABP1_HUMAN]                                      | 39.62 | 4 | 18 | 27 | 187 | 1.058 | 0.998 | 0.991 | 1.120 | 486.69 | 39.62 | 48 | 187 | 636  | 70.6  | 9.50 |
| O75251 | NADH dehydrogenase [ubiquinone] iron-sulfur protein 7, mitochondrial<br>OS=Homo sapiens<br>GN=NDUFS7<br>PE=1 SV=3 - [NDUS7_HUMAN] | 15.02 | 1 | 4  | 4  | 11  | 0.639 | 0.925 | 0.710 | 1.120 | 23.77  | 15.02 | 7  | 11  | 213  | 23.5  | 9.99 |
| Q9H0S4 | Probable ATP-dependent RNA helicase DDX47<br>OS=Homo sapiens<br>GN=DDX47<br>PE=1 SV=1 - [DDX47_HUMAN]                             | 2.64  | 1 | 1  | 1  | 3   | 0.943 | 0.649 | 0.704 | 1.120 | 6.96   | 2.64  | 2  | 3   | 455  | 50.6  | 9.10 |
| Q99623 | Prohibitin-2<br>OS=Homo sapiens<br>GN=PHB2<br>PE=1 SV=2 - [PHB2_HUMAN]                                                            | 66.89 | 1 | 20 | 20 | 125 | 1.077 | 1.089 | 0.843 | 1.120 | 337.62 | 66.89 | 32 | 125 | 299  | 33.3  | 9.83 |
| Q86WR0 | Coiled-coil domain-containing protein 25<br>OS=Homo sapiens<br>GN=CCDC25<br>PE=1 SV=2 - [CCD25_HUMAN]                             | 12.98 | 1 | 4  | 4  | 4   | 1.102 | 1.115 | 0.962 | 1.120 | 4.23   | 12.98 | 4  | 4   | 208  | 24.5  | 6.80 |

|        |                                                                                                                 |       |   |    |    |    |       |       |       |       |        |       |    |    |     |      |      |
|--------|-----------------------------------------------------------------------------------------------------------------|-------|---|----|----|----|-------|-------|-------|-------|--------|-------|----|----|-----|------|------|
| P28062 | Proteasome subunit beta type-8<br>OS=Homo sapiens<br>GN=PSMB8<br>PE=1 SV=3 - [PSB8_HUMAN]                       | 26.45 | 1 | 7  | 7  | 29 | 1.261 | 1.182 | 0.922 | 1.120 | 81.65  | 26.45 | 13 | 29 | 276 | 30.3 | 7.43 |
| Q9P0M6 | Core histone macro-H2A.2<br>OS=Homo sapiens<br>GN=H2AFY2<br>PE=1 SV=3 - [H2AW_HUMAN]                            | 26.08 | 1 | 10 | 11 | 47 | 1.157 | 1.125 | 1.411 | 1.120 | 104.16 | 26.08 | 21 | 47 | 372 | 40.0 | 9.69 |
| Q6P6C2 | RNA demethylase ALKBH5<br>OS=Homo sapiens<br>GN=ALKBH5<br>PE=1 SV=2 - [ALKB5_HUMAN]                             | 5.58  | 1 | 2  | 2  | 3  | 0.682 | 1.740 | 1.132 | 1.121 | 4.97   | 5.58  | 3  | 3  | 394 | 44.2 | 9.09 |
| Q53F39 | Metallophosphoesterase 1<br>OS=Homo sapiens<br>GN=MPPE1<br>PE=1 SV=2 - [MPPE1_HUMAN]                            | 1.77  | 1 | 1  | 1  | 2  | 0.947 | 0.812 | 0.926 | 1.121 | 2.31   | 1.77  | 1  | 2  | 396 | 45.1 | 7.15 |
| Q9H000 | Probable E3 ubiquitin-protein ligase makorin-2<br>OS=Homo sapiens<br>GN=MKRN2<br>PE=1 SV=2 - [MKRN2_HUMAN]      | 19.71 | 1 | 8  | 8  | 15 | 0.992 | 1.015 | 1.182 | 1.121 | 24.94  | 19.71 | 11 | 15 | 416 | 46.9 | 7.61 |
| P05771 | Protein kinase C beta type<br>OS=Homo sapiens<br>GN=PRKCB<br>PE=1 SV=4 - [KPCB_HUMAN]                           | 8.64  | 1 | 3  | 6  | 11 | 1.017 | 1.255 | 0.937 | 1.121 | 14.92  | 8.64  | 7  | 11 | 671 | 76.8 | 7.01 |
| P55157 | Microsomal triglyceride transfer protein large subunit<br>OS=Homo sapiens<br>GN=MTTP<br>PE=1 SV=1 - [MTP_HUMAN] | 0.89  | 1 | 1  | 1  | 1  | 1.059 | 1.020 | 0.756 | 1.121 | 2.38   | 0.89  | 1  | 1  | 894 | 99.3 | 8.41 |
| Q9NRF9 | DNA polymerase epsilon subunit 3<br>OS=Homo sapiens<br>GN=POLE3<br>PE=1 SV=1 - [DPOE3_HUMAN]                    | 7.48  | 1 | 1  | 1  | 2  | 0.947 | 0.679 | 0.725 | 1.121 | 2.81   | 7.48  | 2  | 2  | 147 | 16.8 | 4.74 |

|        |                                                                                                                                                                                                                                                       |       |   |    |    |     |       |       |       |       |        |       |    |     |      |       |      |
|--------|-------------------------------------------------------------------------------------------------------------------------------------------------------------------------------------------------------------------------------------------------------|-------|---|----|----|-----|-------|-------|-------|-------|--------|-------|----|-----|------|-------|------|
| Q9UEU0 | Vesicle transport through interaction with t-SNAREs homolog 1B<br>OS=Homo sapiens<br>GN=VTI1B<br>PE=1 SV=3 - [VTI1B_HUMAN<br>NADH dehydrogenase [ubiquinone] 1 beta subcomplex subunit 1<br>OS=Homo sapiens<br>GN=NDUFB1<br>PE=1 SV=1 - [NDUB1_HUMAN] | 28.02 | 1 | 5  | 5  | 20  | 1.034 | 0.847 | 1.002 | 1.121 | 44.54  | 28.02 | 10 | 20  | 232  | 26.7  | 9.04 |
| O75438 | Heterogeneous nuclear ribonucleoprotein D-like<br>OS=Homo sapiens<br>GN=HNRNPDL<br>PE=1 SV=3 - [HNRDL_HUMAN]                                                                                                                                          | 20.69 | 1 | 2  | 2  | 11  | 0.863 | 1.243 | 0.840 | 1.121 | 26.04  | 20.69 | 4  | 11  | 58   | 7.0   | 8.92 |
| O14979 | LRRN4 C-terminal-like protein<br>OS=Homo sapiens<br>GN=LRRMCL<br>PE=2 SV=1 - [LRN4L_HUMAN]                                                                                                                                                            | 22.38 | 1 | 10 | 11 | 57  | 1.160 | 1.076 | 0.919 | 1.121 | 149.87 | 22.38 | 16 | 57  | 420  | 46.4  | 9.57 |
| Q8ND94 | Serine/threonine-protein kinase MRCK gamma<br>OS=Homo sapiens<br>GN=CDC42BPG<br>PE=1 SV=2 - [MRCKG_HUMA]                                                                                                                                              | 6.30  | 1 | 2  | 2  | 4   | 1.490 | 1.172 | 0.996 | 1.121 | 9.34   | 6.30  | 3  | 4   | 238  | 25.2  | 6.51 |
| Q6DT37 | Inhibitor of nuclear factor kappa-B kinase-interacting protein<br>OS=Homo sapiens<br>GN=IKBIP<br>PE=1 SV=1 - [IKIP_HUMAN]                                                                                                                             | 5.03  | 1 | 3  | 7  | 40  | 0.882 | 1.314 | 1.242 | 1.121 | 89.73  | 5.03  | 7  | 40  | 1551 | 172.4 | 6.28 |
| Q70UQ0 | Leucine zipper transcription factor-like protein 1<br>OS=Homo sapiens<br>GN=LZTFL1<br>PE=1 SV=1 - [LZTL1_HUMAN]                                                                                                                                       | 48.29 | 1 | 18 | 19 | 128 | 0.825 | 0.806 | 0.714 | 1.121 | 259.04 | 48.29 | 31 | 128 | 350  | 39.3  | 9.17 |
| Q9NQ48 |                                                                                                                                                                                                                                                       | 39.80 | 1 | 12 | 12 | 35  | 0.941 | 0.997 | 1.089 | 1.121 | 78.22  | 39.80 | 19 | 35  | 299  | 34.6  | 5.36 |

|        |                                                                                                                                  |       |   |   |    |    |       |       |       |       |       |       |    |    |      |       |      |
|--------|----------------------------------------------------------------------------------------------------------------------------------|-------|---|---|----|----|-------|-------|-------|-------|-------|-------|----|----|------|-------|------|
| O43765 | Small glutamine-rich tetratricopeptide repeat-containing protein alpha<br>OS=Homo sapiens<br>GN=SGTA<br>PE=1 SV=1 - [SGTA_HUMAN] | 13.42 | 1 | 4 | 4  | 20 | 0.992 | 1.182 | 0.951 | 1.121 | 48.88 | 13.42 | 8  | 20 | 313  | 34.0  | 4.87 |
| O60333 | Kinesin-like protein KIF1B<br>OS=Homo sapiens<br>GN=KIF1B<br>PE=1 SV=5 - [KIF1B_HUMAN]                                           | 7.16  | 1 | 4 | 12 | 40 | 0.805 | 0.883 | 1.249 | 1.122 | 93.36 | 7.16  | 17 | 40 | 1816 | 204.3 | 5.60 |
| Q8TDF6 | RAS guanyl-releasing protein 4<br>OS=Homo sapiens<br>GN=RASGRP4<br>PE=1 SV=2 - [GRP4_HUMAN]                                      | 1.04  | 1 | 1 | 1  | 4  | 1.233 | 0.790 | 0.914 | 1.122 | 9.71  | 1.04  | 1  | 4  | 673  | 74.8  | 8.02 |
| Q9NY27 | Serine/threonine-protein phosphatase 4 regulatory subunit 2<br>OS=Homo sapiens<br>GN=PPP4R2<br>PE=1 SV=3 - [PP4R2_HUMAN]         | 20.14 | 1 | 6 | 7  | 14 | 0.819 | 0.802 | 0.759 | 1.122 | 34.86 | 20.14 | 8  | 14 | 417  | 46.9  | 4.54 |
| Q9BXR0 | Queuine tRNA-ribosyltransferase<br>OS=Homo sapiens<br>GN=QTRT1<br>PE=1 SV=3 - [TGT_HUMAN]                                        | 10.92 | 1 | 4 | 4  | 8  | 0.856 | 1.140 | 0.990 | 1.122 | 17.11 | 10.92 | 6  | 8  | 403  | 44.0  | 7.23 |
| Q12788 | Transducin beta-like protein 3<br>OS=Homo sapiens<br>GN=TBLL3 PE=1 SV=2 - [TBLL3_HUMAN]                                          | 13.12 | 1 | 7 | 7  | 11 | 0.863 | 0.867 | 0.894 | 1.122 | 35.17 | 13.12 | 8  | 11 | 808  | 89.0  | 6.90 |
| Q13445 | Transmembrane domain-containing protein 1<br>OS=Homo sapiens<br>GN=TMED1<br>PE=1 SV=1 - [TMED1_HUMAN]                            | 9.25  | 1 | 2 | 2  | 6  | 0.703 | 0.447 | 0.620 | 1.122 | 16.14 | 9.25  | 3  | 6  | 227  | 25.2  | 4.48 |
| Q9NPJ6 | Mediator of RNA polymerase II transcription subunit 4<br>OS=Homo sapiens<br>GN=MED4<br>PE=1 SV=1 - [MED4_HUMAN]                  | 8.15  | 1 | 2 | 2  | 4  | 0.948 | 1.191 | 1.035 | 1.123 | 9.74  | 8.15  | 3  | 4  | 270  | 29.7  | 5.10 |



|        |                                                                                                                  |       |   |   |    |     |       |       |       |       |        |       |    |     |     |      |       |
|--------|------------------------------------------------------------------------------------------------------------------|-------|---|---|----|-----|-------|-------|-------|-------|--------|-------|----|-----|-----|------|-------|
| Q9BTU6 | Phosphatidylinositol 4-kinase type 2-alpha<br>OS=Homo sapiens<br>GN=PI4K2A<br>PE=1 SV=1 - [P4K2A_HUMAN]          | 20.04 | 1 | 9 | 10 | 34  | 0.912 | 0.900 | 0.931 | 1.123 | 68.42  | 20.04 | 15 | 34  | 479 | 54.0 | 8.29  |
| P62341 | Selenoprotein T<br>OS=Homo sapiens<br>GN=SELT PE=2 SV=2 - [SELT_HUMAN]                                           | 17.95 | 1 | 3 | 3  | 13  | 1.092 | 0.809 | 0.816 | 1.123 | 36.43  | 17.95 | 6  | 13  | 195 | 22.3 | 8.60  |
| Q969H8 | UPF0556 protein<br>C19orf10<br>OS=Homo sapiens<br>GN=C19orf10<br>PE=1 SV=1 - [CS010_HUMAN]                       | 24.86 | 1 | 6 | 6  | 31  | 0.770 | 0.787 | 0.681 | 1.123 | 72.44  | 24.86 | 10 | 31  | 173 | 18.8 | 6.68  |
| Q9H477 | Ribokinase<br>OS=Homo sapiens<br>GN=RBKS<br>PE=1 SV=1 - [RBSK_HUMAN]                                             | 5.59  | 1 | 2 | 2  | 5   | 0.849 | 0.840 | 0.821 | 1.123 | 9.81   | 5.59  | 4  | 5   | 322 | 34.1 | 5.05  |
| Q15287 | RNA-binding protein with serine-rich domain 1<br>OS=Homo sapiens<br>GN=RNPS1<br>PE=1 SV=1 - [RNPS1_HUMAN]        | 6.56  | 1 | 2 | 2  | 6   | 1.055 | 1.111 | 1.046 | 1.123 | 14.01  | 6.56  | 3  | 6   | 305 | 34.2 | 11.84 |
| P16389 | Potassium voltage-gated channel subfamily A member 2<br>OS=Homo sapiens<br>GN=KCNA2<br>PE=1 SV=2 - [KCNA2_HUMAN] | 2.61  | 1 | 1 | 1  | 1   | 1.499 | 0.962 | 1.029 | 1.123 | 3.33   | 2.61  | 1  | 1   | 499 | 56.7 | 4.86  |
| Q9UBV7 | Beta-1,4-galactosyltransferase 7<br>OS=Homo sapiens<br>GN=B4GALT7<br>PE=1 SV=1 - [B4GT7_HUMAN]                   | 3.36  | 1 | 1 | 1  | 4   | 1.198 | 0.973 | 1.354 | 1.123 | 5.39   | 3.36  | 2  | 4   | 327 | 37.4 | 8.98  |
| Q9H8M5 | Metal transporter<br>CNNM2<br>OS=Homo sapiens<br>GN=CNNM2<br>PE=1 SV=2 - [CNNM2_HUMAN]                           | 7.77  | 1 | 6 | 6  | 9   | 1.196 | 0.720 | 0.784 | 1.123 | 18.93  | 7.77  | 8  | 9   | 875 | 96.6 | 6.38  |
| P26447 | Protein S100-A4<br>OS=Homo sapiens<br>GN=S100A4<br>PE=1 SV=1 - [S10A4_HUMAN]                                     | 53.47 | 1 | 8 | 8  | 115 | 2.986 | 0.417 | 0.603 | 1.123 | 223.86 | 53.47 | 13 | 115 | 101 | 11.7 | 6.11  |

|        |                                                                                                                                        |       |   |    |    |     |       |       |       |       |         |       |     |     |      |       |      |
|--------|----------------------------------------------------------------------------------------------------------------------------------------|-------|---|----|----|-----|-------|-------|-------|-------|---------|-------|-----|-----|------|-------|------|
| P62312 | U6 snRNA-associated Sm-like protein<br>LSM6<br>OS=Homo sapiens<br>GN=LSM6<br>PE=1 SV=1 - [LSM6_HUMAN]                                  | 33.75 | 1 | 3  | 3  | 8   | 1.240 | 1.247 | 0.847 | 1.123 | 17.04   | 33.75 | 5   | 8   | 80   | 9.1   | 9.58 |
| Q9HBL7 | Plasminogen receptor (KT)<br>OS=Homo sapiens<br>GN=PLGRKT<br>PE=1 SV=1 - [PLRKT_HUMAN]                                                 | 15.65 | 1 | 2  | 2  | 12  | 1.291 | 1.014 | 0.717 | 1.123 | 36.16   | 15.65 | 4   | 12  | 147  | 17.2  | 9.58 |
| P59826 | BPI fold-containing family B member 3<br>OS=Homo sapiens<br>GN=BPIFB3<br>PE=2 SV=2 - [BPIB3_HUMAN]                                     | 2.31  | 1 | 1  | 1  | 2   | 0.855 | 0.727 | 0.652 | 1.123 | 1.77    | 2.31  | 2   | 2   | 476  | 50.3  | 6.74 |
| P82673 | 28S ribosomal protein S35, mitochondrial<br>OS=Homo sapiens<br>GN=MRPS35<br>PE=1 SV=1 - [RT35_HUMAN]                                   | 18.58 | 1 | 7  | 7  | 12  | 0.826 | 1.497 | 0.996 | 1.124 | 20.77   | 18.58 | 9   | 12  | 323  | 36.8  | 8.24 |
| Q8WZ64 | Arf-GAP with Rho-GAP domain, ANK repeat and PH domain-containing protein 2<br>OS=Homo sapiens<br>GN=ARAP2<br>PE=1 SV=3 - [ARAP2_HUMAN] | 0.70  | 1 | 1  | 1  | 1   | 1.193 | 0.726 | 0.586 | 1.124 | 3.10    | 0.70  | 1   | 1   | 1704 | 193.3 | 7.39 |
| Q17RR3 | Pancreatic lipase-related protein 3<br>OS=Homo sapiens<br>GN=PNLIPRP3<br>PE=2 SV=2 - [LIPR3_HUMAN]                                     | 2.57  | 1 | 1  | 1  | 1   | 0.719 | 0.738 | 1.373 | 1.124 | 0.00    | 2.57  | 1   | 1   | 467  | 52.2  | 8.27 |
| Q6LX04 | Peptidyl-prolyl cis-trans isomerase CWC27 homolog<br>OS=Homo sapiens<br>GN=CWC27<br>PE=1 SV=1 - [CWC27_HUMAN]                          | 6.78  | 1 | 2  | 3  | 7   | 0.950 | 1.166 | 1.197 | 1.124 | 20.55   | 6.78  | 4   | 7   | 472  | 53.8  | 5.80 |
| P12111 | Collagen alpha-3(VI) chain<br>OS=Homo sapiens<br>GN=COL6A3<br>PE=1 SV=5 - [CO6A3_HUMAN]                                                | 35.76 | 1 | 98 | 98 | 540 | 0.808 | 2.457 | 1.208 | 1.124 | 1390.67 | 35.76 | 164 | 540 | 3177 | 343.5 | 6.68 |

|        |                                                                                                                        |       |   |    |    |     |       |       |       |       |        |       |    |     |      |       |      |
|--------|------------------------------------------------------------------------------------------------------------------------|-------|---|----|----|-----|-------|-------|-------|-------|--------|-------|----|-----|------|-------|------|
| Q09028 | Histone-binding protein RBBP4<br>OS=Homo sapiens<br>GN=RBBP4<br>PE=1 SV=3 - [RBBP4_HUMAN]                              | 21.88 | 1 | 3  | 9  | 35  | 1.300 | 1.101 | 1.034 | 1.124 | 105.81 | 21.88 | 13 | 35  | 425  | 47.6  | 4.89 |
| Q13136 | Liprin-alpha-1<br>OS=Homo sapiens<br>GN=PPF1A1<br>PE=1 SV=1 - [LIPA1_HUMAN]                                            | 13.23 | 1 | 12 | 16 | 42  | 1.115 | 1.030 | 0.857 | 1.124 | 102.27 | 13.23 | 25 | 42  | 1202 | 135.7 | 6.29 |
| Q9BXP2 | Solute carrier family 12 member 9<br>OS=Homo sapiens<br>GN=SLC12A9<br>PE=1 SV=1 - [S12A9_HUMAN]                        | 1.64  | 1 | 1  | 1  | 4   | 1.377 | 0.837 | 0.768 | 1.124 | 14.56  | 1.64  | 2  | 4   | 914  | 96.0  | 8.07 |
| Q81VL0 | Neuron navigator 3<br>OS=Homo sapiens<br>GN=NAV3<br>PE=1 SV=3 - [NAV3_HUMAN]                                           | 2.14  | 1 | 2  | 3  | 4   | 0.933 | 1.655 | 0.518 | 1.124 | 12.37  | 2.14  | 3  | 4   | 2385 | 255.5 | 8.76 |
| P51531 | Probable global transcription activator SNF2L2<br>OS=Homo sapiens<br>GN=SMARCA2<br>PE=1 SV=2 - [SMCA2_HUMA]            | 8.11  | 1 | 5  | 13 | 37  | 0.948 | 1.165 | 0.978 | 1.124 | 95.22  | 8.11  | 17 | 37  | 1590 | 181.2 | 7.20 |
| Q5C9Z4 | Nuclear MIF4G domain-containing protein 1<br>OS=Homo sapiens<br>GN=NOM1<br>PE=1 SV=1 - [NOM1_HUMAN]                    | 1.51  | 1 | 1  | 1  | 2   | 0.560 | 0.751 | 0.890 | 1.124 | 5.41   | 1.51  | 2  | 2   | 860  | 96.2  | 8.10 |
| Q5NDL2 | EGF domain-specific O-linked N-acetylglucosamine transferase<br>OS=Homo sapiens<br>GN=EOGT<br>PE=1 SV=1 - [EOGT_HUMAN] | 13.28 | 1 | 5  | 5  | 17  | 1.053 | 1.031 | 1.220 | 1.124 | 32.67  | 13.28 | 7  | 17  | 527  | 62.0  | 7.05 |
| Q9Y266 | Nuclear migration protein nudC<br>OS=Homo sapiens<br>GN=NUDC<br>PE=1 SV=1 - [NUDC_HUMAN]                               | 50.76 | 1 | 21 | 22 | 124 | 1.050 | 1.075 | 1.098 | 1.125 | 306.03 | 50.76 | 33 | 124 | 331  | 38.2  | 5.38 |

|        |                                                                                                                              |       |   |    |    |    |       |       |       |       |        |       |    |    |     |      |       |
|--------|------------------------------------------------------------------------------------------------------------------------------|-------|---|----|----|----|-------|-------|-------|-------|--------|-------|----|----|-----|------|-------|
| Q9UHU1 | Putative uncharacterized protein<br>PRO1716<br>OS=Homo sapiens<br>GN=PRO1716<br>PE=5 SV=1 - [YK039_HUMAN]                    | 30.23 | 1 | 1  | 1  | 13 | 1.583 | 0.904 | 1.014 | 1.125 | 16.36  | 30.23 | 1  | 13 | 43  | 4.9  | 8.62  |
| Q8N3V7 | Synaptopodin<br>OS=Homo sapiens<br>GN=SYNPO<br>PE=1 SV=2 - [SYNPO_HUMAN]                                                     | 15.72 | 1 | 11 | 11 | 38 | 2.106 | 0.518 | 0.793 | 1.125 | 106.78 | 15.72 | 18 | 38 | 929 | 99.4 | 8.72  |
| Q0JRZ9 | FCH domain only protein 2<br>OS=Homo sapiens<br>GN=FCHO2<br>PE=1 SV=2 - [FCHO2_HUMAN]                                        | 10.62 | 1 | 7  | 8  | 15 | 0.788 | 1.152 | 1.239 | 1.125 | 31.27  | 10.62 | 10 | 15 | 810 | 88.9 | 6.86  |
| Q96QD8 | Sodium-coupled neutral amino acid transporter 2<br>OS=Homo sapiens<br>GN=SLC38A2<br>PE=1 SV=2 - [S38A2_HUMAN]                | 4.35  | 1 | 2  | 2  | 5  | 1.957 | 0.781 | 1.668 | 1.125 | 26.32  | 4.35  | 2  | 5  | 506 | 56.0 | 8.00  |
| Q2NL98 | Vimentin-type intermediate filament-associated coiled-coil protein<br>OS=Homo sapiens<br>GN=VMAC<br>PE=2 SV=1 - [VMAC_HUMAN] | 5.33  | 1 | 1  | 1  | 3  | 1.452 | 1.413 | 1.112 | 1.125 | 9.69   | 5.33  | 2  | 3  | 169 | 18.3 | 5.73  |
| Q9NRX2 | 39S ribosomal protein L17, mitochondrial<br>OS=Homo sapiens<br>GN=MRPL17<br>PE=1 SV=1 - [RM17_HUMAN]                         | 8.57  | 1 | 2  | 2  | 2  | 0.872 | 0.926 | 1.164 | 1.125 | 3.69   | 8.57  | 2  | 2  | 175 | 20.0 | 10.11 |
| Q96EY1 | DnaJ homolog subfamily A member 3, mitochondrial<br>OS=Homo sapiens<br>GN=DNAJA3<br>PE=1 SV=2 - [DNAJA3_HUMAN]               | 15.83 | 1 | 6  | 6  | 15 | 1.013 | 1.101 | 0.883 | 1.126 | 37.85  | 15.83 | 9  | 15 | 480 | 52.5 | 9.26  |
| O75582 | Ribosomal protein S6 kinase alpha-5<br>OS=Homo sapiens<br>GN=RPS6KA5<br>PE=1 SV=1 - [KS6A5_HUMAN]                            | 1.62  | 1 | 1  | 2  | 2  | 0.770 | 0.713 | 0.890 | 1.126 | 4.73   | 1.62  | 2  | 2  | 802 | 89.8 | 7.11  |

|        |                                                                                                                                                       |       |   |    |    |    |       |       |       |       |        |       |    |    |      |       |      |
|--------|-------------------------------------------------------------------------------------------------------------------------------------------------------|-------|---|----|----|----|-------|-------|-------|-------|--------|-------|----|----|------|-------|------|
| 094874 | E3 UFM1-<br>protein ligase<br>1 OS=Homo<br>sapiens<br>GN=UFL1 PE=1<br>SV=2 -<br>[UFL1_HUMAN]                                                          | 44.46 | 2 | 30 | 30 | 92 | 0.932 | 0.845 | 0.819 | 1.126 | 221.87 | 44.46 | 46 | 92 | 794  | 89.5  | 6.79 |
| Q318U1 | Chromodomain-<br>helicase-DNA-<br>binding protein<br>9 OS=Homo<br>sapiens<br>GN=CHD9<br>PE=1 SV=2 -<br>[CHD9_HUMAN]                                   | 0.41  | 1 | 1  | 1  | 1  | 1.046 | 0.996 | 1.303 | 1.126 | 2.27   | 0.41  | 1  | 1  | 2897 | 325.8 | 7.01 |
| Q7L7V1 | Putative pre-<br>mRNA-splicing<br>factor ATP-<br>dependent<br>RNA helicase<br>DHX32<br>OS=Homo<br>sapiens<br>GN=DHX32<br>PE=1 SV=1 -<br>[DHX32_HUMAN] | 0.94  | 1 | 1  | 1  | 2  | 0.723 | 2.315 | 1.778 | 1.126 | 5.52   | 0.94  | 1  | 2  | 743  | 84.4  | 4.97 |
| Q9Y3D0 | Mitotic spindle-<br>associated<br>MMXD complex<br>subunit MIP18<br>OS=Homo<br>sapiens<br>GN=FAM96B<br>PE=1 SV=1 -<br>[MIP18_HUMAN<br>]                | 30.67 | 1 | 3  | 3  | 13 | 0.862 | 1.494 | 1.050 | 1.126 | 52.75  | 30.67 | 3  | 13 | 163  | 17.7  | 5.19 |
| Q86Y01 | E3 ubiquitin-<br>protein ligase<br>DTX1<br>OS=Homo<br>sapiens<br>GN=DTX1<br>PE=1 SV=1 -<br>[DTX1_HUMAN]                                               | 2.26  | 1 | 1  | 1  | 2  | 1.215 | 0.861 | 1.125 | 1.126 | 2.75   | 2.26  | 1  | 2  | 620  | 67.3  | 9.60 |
| Q92599 | Septin-8<br>OS=Homo<br>sapiens<br>GN=SEPT8<br>PE=1 SV=4 -<br>[SEPT8_HUMAN<br>]                                                                        | 26.29 | 1 | 7  | 11 | 43 | 1.700 | 0.865 | 1.147 | 1.126 | 101.01 | 26.29 | 16 | 43 | 483  | 55.7  | 6.28 |
| Q9BZZ5 | Apoptosis<br>inhibitor 5<br>OS=Homo<br>sapiens<br>GN=API5 PE=1<br>SV=3 -<br>[API5_HUMAN]                                                              | 29.58 | 1 | 14 | 14 | 54 | 1.127 | 1.307 | 1.001 | 1.126 | 141.15 | 29.58 | 21 | 54 | 524  | 59.0  | 7.34 |
| Q14699 | Raftlin<br>OS=Homo<br>sapiens<br>GN=RFTN1<br>PE=1 SV=4 -<br>[RFTN1_HUMAN<br>]                                                                         | 30.28 | 1 | 14 | 14 | 47 | 1.494 | 0.825 | 1.244 | 1.126 | 131.80 | 30.28 | 22 | 47 | 578  | 63.1  | 5.67 |

|        |                                                                                                                       |       |   |    |    |     |       |       |       |       |        |       |    |     |      |       |      |
|--------|-----------------------------------------------------------------------------------------------------------------------|-------|---|----|----|-----|-------|-------|-------|-------|--------|-------|----|-----|------|-------|------|
| Q9UJJ9 | N-acetylglucosamine-1-phosphotransferase subunit gamma<br>OS=Homo sapiens<br>GN=GNPTG<br>PE=1 SV=1 - [GNPTG_HUMAN]    | 5.57  | 1 | 2  | 2  | 2   | 1.172 | 0.993 | 1.048 | 1.127 | 4.38   | 5.57  | 2  | 2   | 305  | 34.0  | 6.95 |
| O60292 | Signal-induced proliferation-associated 1-like protein 3<br>OS=Homo sapiens<br>GN=SIPA1L3<br>PE=1 SV=3 - [S1L3_HUMAN] | 3.82  | 1 | 5  | 5  | 9   | 0.835 | 0.381 | 0.510 | 1.127 | 20.50  | 3.82  | 5  | 9   | 1781 | 194.5 | 8.32 |
| Q13201 | Multimerin-1<br>OS=Homo sapiens<br>GN=MMRN1<br>PE=1 SV=3 - [MMRN1_HUMAN]                                              | 0.65  | 1 | 1  | 1  | 1   | 1.133 | 0.909 | 0.776 | 1.127 | 2.08   | 0.65  | 1  | 1   | 1228 | 138.0 | 7.93 |
| Q63ZY3 | KN motif and ankyrin repeat domain-containing protein 2<br>OS=Homo sapiens<br>GN=KANK2<br>PE=1 SV=1 - [KANK2_HUMAN]   | 40.07 | 2 | 28 | 30 | 129 | 1.008 | 1.923 | 1.376 | 1.127 | 339.70 | 40.07 | 47 | 129 | 851  | 91.1  | 5.63 |
| P51793 | H(+)/Cl(-) exchange transporter 4<br>OS=Homo sapiens<br>GN=CLCN4<br>PE=1 SV=2 - [CLCN4_HUMAN]                         | 1.45  | 1 | 2  | 2  | 4   | 1.027 | 0.960 | 0.819 | 1.127 | 2.66   | 1.45  | 2  | 4   | 760  | 84.9  | 6.86 |
| Q13148 | TAR DNA-binding protein 43<br>OS=Homo sapiens<br>GN=TARDBP<br>PE=1 SV=1 - [TADBP_HUMAN]                               | 21.26 | 1 | 7  | 7  | 20  | 1.105 | 1.406 | 1.075 | 1.127 | 49.79  | 21.26 | 9  | 20  | 414  | 44.7  | 6.19 |
| P53420 | Collagen alpha-4(IV) chain<br>OS=Homo sapiens<br>GN=COL4A4<br>PE=1 SV=3 - [CO4A4_HUMAN]                               | 2.84  | 1 | 2  | 2  | 2   | 1.380 | 0.636 | 1.211 | 1.127 | 5.75   | 2.84  | 2  | 2   | 1690 | 163.9 | 8.62 |
| P08253 | 72 kDa type IV collagenase<br>OS=Homo sapiens<br>GN=MMP2<br>PE=1 SV=2 - [MMP2_HUMAN]                                  | 11.97 | 2 | 7  | 7  | 11  | 0.515 | 0.587 | 0.436 | 1.127 | 26.52  | 11.97 | 10 | 11  | 660  | 73.8  | 5.47 |

|        |                                                                                                                                                            |       |   |    |    |    |       |       |       |       |       |       |    |    |     |      |      |
|--------|------------------------------------------------------------------------------------------------------------------------------------------------------------|-------|---|----|----|----|-------|-------|-------|-------|-------|-------|----|----|-----|------|------|
| Q32P44 | Echinoderm<br>microtubule-<br>associated<br>protein-like 3<br>OS=Homo<br>sapiens<br>GN=EML3<br>PE=1 SV=1 -<br>[EMAL3_HUMAN<br>]                            | 16.41 | 1 | 14 | 14 | 42 | 1.029 | 1.168 | 1.045 | 1.127 | 98.93 | 16.41 | 24 | 42 | 896 | 95.1 | 7.12 |
| Q9NZ01 | Very-long-chain<br>enoyl-CoA<br>reductase<br>OS=Homo<br>sapiens<br>GN=TECR<br>PE=1 SV=1 -<br>[TECR_HUMAN]                                                  | 14.61 | 1 | 4  | 5  | 25 | 1.294 | 0.886 | 0.818 | 1.127 | 58.86 | 14.61 | 10 | 25 | 308 | 36.0 | 9.45 |
| P82675 | 28S ribosomal<br>protein S5,<br>mitochondrial<br>OS=Homo<br>sapiens<br>GN=MRPS5<br>PE=1 SV=2 -<br>[RTOS_HUMAN]                                             | 20.47 | 1 | 8  | 9  | 20 | 0.921 | 1.366 | 0.970 | 1.127 | 55.24 | 20.47 | 12 | 20 | 430 | 48.0 | 9.92 |
| O75380 | NADH<br>dehydrogenase<br>[ubiquinone]<br>iron-sulfur<br>protein 6,<br>mitochondrial<br>OS=Homo<br>sapiens<br>GN=NDUFS6<br>PE=1 SV=1 -<br>[NDUS6_HUMAN<br>] | 48.39 | 1 | 4  | 4  | 8  | 0.817 | 0.952 | 0.820 | 1.128 | 24.59 | 48.39 | 5  | 8  | 124 | 13.7 | 8.28 |
| Q9HC16 | DNA dC->dU-<br>editing enzyme<br>APOBEC-3G<br>OS=Homo<br>sapiens<br>GN=APOBEC3G<br>PE=1 SV=1 -<br>[ABC3G_HUMAN<br>]                                        | 7.03  | 1 | 3  | 3  | 8  | 1.334 | 0.904 | 0.419 | 1.128 | 19.48 | 7.03  | 3  | 8  | 384 | 46.4 | 8.00 |
| P23258 | Tubulin gamma-<br>1 chain<br>OS=Homo<br>sapiens<br>GN=TUBG1<br>PE=1 SV=2 -<br>[TBG1_HUMAN]                                                                 | 22.17 | 2 | 11 | 11 | 24 | 1.130 | 1.171 | 0.923 | 1.128 | 55.50 | 22.17 | 17 | 24 | 451 | 51.1 | 6.14 |
| O43709 | Probable 18S<br>rRNA (guanine-<br>N(7))-<br>methyltransfer<br>ase OS=Homo<br>sapiens<br>GN=WBSR22<br>PE=1 SV=2 -<br>[WBS22_HUMA<br>N]                      | 10.32 | 1 | 2  | 2  | 2  | 1.000 | 0.561 | 0.662 | 1.128 | 8.53  | 10.32 | 2  | 2  | 281 | 31.9 | 8.73 |
| Q06546 | GA-binding<br>protein alpha<br>chain<br>OS=Homo<br>sapiens<br>GN=GABPA<br>PE=1 SV=1 -<br>[GABPA_HUMAN<br>]                                                 | 10.35 | 1 | 5  | 5  | 15 | 1.100 | 1.252 | 0.915 | 1.128 | 32.34 | 10.35 | 7  | 15 | 454 | 51.3 | 4.97 |

|        |                                                                                                                            |       |   |    |    |    |       |       |       |       |        |       |    |    |      |       |       |
|--------|----------------------------------------------------------------------------------------------------------------------------|-------|---|----|----|----|-------|-------|-------|-------|--------|-------|----|----|------|-------|-------|
| Q9NWH9 | SAFB-like transcription modulator<br>OS=Homo sapiens<br>GN=SLTM<br>PE=1 SV=2 - [SLTM_HUMAN]                                | 12.57 | 1 | 12 | 12 | 22 | 1.229 | 1.472 | 1.100 | 1.128 | 46.52  | 12.57 | 17 | 22 | 1034 | 117.1 | 7.87  |
| Q9BT22 | Chitobiosyl(diphosphodolichol beta-mannosyl)transferase<br>OS=Homo sapiens<br>GN=ALG1 PE=1<br>SV=2 - [ALG1_HUMAN]          | 4.74  | 1 | 2  | 2  | 11 | 1.382 | 1.059 | 0.788 | 1.129 | 37.12  | 4.74  | 3  | 11 | 464  | 52.5  | 7.23  |
| Q8TDP1 | Ribonuclease H2 subunit C<br>OS=Homo sapiens<br>GN=RNASEH2C<br>PE=1 SV=1 - [RNH2C_HUMAN]                                   | 6.71  | 1 | 1  | 1  | 2  | 0.928 | 1.385 | 1.072 | 1.129 | 2.59   | 6.71  | 2  | 2  | 164  | 17.8  | 5.03  |
| Q5T653 | 39S ribosomal protein L2, mitochondrial<br>OS=Homo sapiens<br>GN=MRPL2<br>PE=1 SV=2 - [RMO2_HUMAN]                         | 8.52  | 1 | 3  | 3  | 8  | 1.082 | 1.522 | 0.967 | 1.129 | 18.11  | 8.52  | 5  | 8  | 305  | 33.3  | 11.30 |
| Q9HD20 | Manganese-transporting ATPase 13A1<br>OS=Homo sapiens<br>GN=ATP13A1<br>PE=1 SV=2 - [AT131_HUMAN]                           | 20.27 | 1 | 23 | 23 | 86 | 0.920 | 0.765 | 0.763 | 1.129 | 203.41 | 20.27 | 39 | 86 | 1204 | 132.9 | 8.13  |
| Q96S66 | Chloride channel CLIC-like protein 1<br>OS=Homo sapiens<br>GN=CLCC1<br>PE=1 SV=1 - [CLCC1_HUMAN]                           | 25.77 | 1 | 14 | 14 | 93 | 0.986 | 0.747 | 0.881 | 1.129 | 222.72 | 25.77 | 21 | 93 | 551  | 62.0  | 5.55  |
| Q9BWF3 | RNA-binding protein 4<br>OS=Homo sapiens<br>GN=RBM4<br>PE=1 SV=1 - [RBM4_HUMAN]                                            | 33.52 | 2 | 10 | 10 | 33 | 1.187 | 1.052 | 0.958 | 1.129 | 99.12  | 33.52 | 19 | 33 | 364  | 40.3  | 7.08  |
| P30038 | Delta-1-pyrroline-5-carboxylate dehydrogenase, mitochondrial<br>OS=Homo sapiens<br>GN=ALDH4A1<br>PE=1 SV=3 - [AL4A1_HUMAN] | 26.29 | 1 | 14 | 14 | 45 | 1.005 | 1.331 | 1.277 | 1.129 | 92.07  | 26.29 | 24 | 45 | 563  | 61.7  | 8.07  |



|        |                                                                                                                                                                                                                                                      |       |   |    |    |    |       |       |       |       |        |       |    |    |      |       |      |
|--------|------------------------------------------------------------------------------------------------------------------------------------------------------------------------------------------------------------------------------------------------------|-------|---|----|----|----|-------|-------|-------|-------|--------|-------|----|----|------|-------|------|
| Q92878 | DNA repair<br>protein RAD50<br>OS=Homo<br>sapiens<br>GN=RAD50<br>PE=1 SV=1 -<br>[RAD50_HUMAN<br>]<br>CSC1-like<br>protein 2<br>OS=Homo<br>sapiens<br>GN=TMEM63B<br>PE=1 SV=1 -<br>[CSC12_HUMAN<br>]                                                  | 26.60 | 1 | 34 | 35 | 95 | 0.967 | 1.213 | 0.917 | 1.129 | 221.27 | 26.60 | 49 | 95 | 1312 | 153.8 | 6.89 |
| Q5T3F8 | Lysosomal<br>alpha-<br>mannosidase<br>OS=Homo<br>sapiens<br>GN=MAN2B1<br>PE=1 SV=3 -<br>[MA2B1_HUMA<br>N]<br>Tumor necrosis<br>factor receptor<br>superfamily<br>member 1A<br>OS=Homo<br>sapiens<br>GN=TNFRSF1A<br>PE=1 SV=1 -<br>[TNFR1A_HUMAN<br>] | 7.45  | 1 | 7  | 7  | 11 | 1.532 | 0.501 | 0.661 | 1.129 | 21.17  | 7.45  | 10 | 11 | 832  | 94.9  | 7.40 |
| O00754 | LEM domain-<br>containing<br>protein 2<br>OS=Homo<br>sapiens<br>GN=LEMD2<br>PE=1 SV=1 -<br>[LEMD2_HUMAN<br>]                                                                                                                                         | 22.55 | 1 | 20 | 20 | 67 | 1.130 | 1.241 | 1.336 | 1.129 | 153.24 | 22.55 | 29 | 67 | 1011 | 113.7 | 7.28 |
| P19438 | Myb-binding<br>protein 1A<br>OS=Homo<br>sapiens<br>GN=MYBBP1A<br>PE=1 SV=2 -<br>[MBB1A_HUMA<br>N]<br>Translation<br>initiation factor<br>eIF-2B subunit<br>gamma<br>OS=Homo<br>sapiens<br>GN=EIF2B3<br>PE=1 SV=1 -<br>[EI2BG_HUMAN<br>]              | 2.20  | 1 | 1  | 1  | 2  | 0.771 | 0.703 | 0.661 | 1.129 | 7.69   | 2.20  | 1  | 2  | 455  | 50.5  | 6.64 |
| Q8NC56 | Plexin-C1<br>OS=Homo<br>sapiens<br>GN=PLXNC1<br>PE=1 SV=1 -<br>[PLXC1_HUMAN<br>]                                                                                                                                                                     | 25.05 | 1 | 12 | 12 | 43 | 1.272 | 1.085 | 1.040 | 1.129 | 109.13 | 25.05 | 19 | 43 | 503  | 56.9  | 9.00 |
| Q9BQG0 | Uncharacterize<br>d protein<br>C20orf24<br>OS=Homo<br>sapiens<br>GN=C20orf24<br>PE=2 SV=1 -<br>[CT024_HUMAN<br>]                                                                                                                                     | 20.93 | 1 | 25 | 25 | 72 | 0.731 | 0.763 | 0.770 | 1.129 | 223.04 | 20.93 | 38 | 72 | 1328 | 148.8 | 9.28 |
| Q9NR50 |                                                                                                                                                                                                                                                      | 20.13 | 1 | 10 | 10 | 21 | 1.073 | 0.707 | 0.799 | 1.129 | 31.46  | 20.13 | 16 | 21 | 452  | 50.2  | 6.47 |
| O60486 |                                                                                                                                                                                                                                                      | 0.77  | 1 | 1  | 1  | 1  | 5.746 | 1.186 | 0.822 | 1.130 | 0.00   | 0.77  | 1  | 1  | 1568 | 175.6 | 7.61 |
| Q9BUV8 |                                                                                                                                                                                                                                                      | 11.68 | 1 | 1  | 1  | 3  | 0.919 | 0.722 | 0.801 | 1.130 | 3.53   | 11.68 | 2  | 3  | 137  | 15.5  | 5.20 |

|        |                                                                                                                         |       |   |    |    |     |       |       |       |       |         |       |    |     |     |      |      |
|--------|-------------------------------------------------------------------------------------------------------------------------|-------|---|----|----|-----|-------|-------|-------|-------|---------|-------|----|-----|-----|------|------|
| P55072 | Transitional endoplasmic reticulum ATPase<br>OS=Homo sapiens<br>GN=VCP PE=1 SV=4 - [TERA_HUMAN]                         | 57.69 | 4 | 47 | 47 | 778 | 1.142 | 0.941 | 1.071 | 1.130 | 1887.06 | 57.69 | 81 | 778 | 806 | 89.3 | 5.26 |
| O95372 | Acyl-protein thioesterase 2<br>OS=Homo sapiens<br>GN=LYPLA2 PE=1 SV=1 - [LYPA2_HUMAN]                                   | 36.80 | 1 | 8  | 8  | 33  | 1.015 | 1.114 | 1.469 | 1.130 | 55.08   | 36.80 | 16 | 33  | 231 | 24.7 | 7.23 |
| O43159 | Ribosomal RNA-processing protein 8<br>OS=Homo sapiens<br>GN=RRP8 PE=1 SV=2 - [RRP8_HUMAN]                               | 13.82 | 1 | 5  | 5  | 13  | 0.864 | 0.970 | 0.785 | 1.130 | 37.36   | 13.82 | 7  | 13  | 456 | 50.7 | 9.42 |
| O95352 | Ubiquitin-like modifier-activating enzyme ATG7<br>OS=Homo sapiens<br>GN=ATG7 PE=1 SV=1 - [ATG7_HUMAN]                   | 19.49 | 1 | 12 | 12 | 29  | 1.027 | 1.097 | 1.061 | 1.130 | 73.71   | 19.49 | 18 | 29  | 703 | 77.9 | 6.24 |
| Q13137 | Calcium-binding and coiled-coil domain-containing protein 2<br>OS=Homo sapiens<br>GN=CALCOCO2 PE=1 SV=1 - [CACO2_HUMAN] | 5.16  | 1 | 2  | 2  | 8   | 1.336 | 1.059 | 1.118 | 1.130 | 14.70   | 5.16  | 4  | 8   | 446 | 52.2 | 5.02 |
| Q92600 | Cell differentiation protein RCD1 homolog<br>OS=Homo sapiens<br>GN=RQCD1 PE=1 SV=1 - [RCD1_HUMAN]                       | 11.71 | 1 | 4  | 4  | 4   | 0.916 | 1.312 | 1.295 | 1.130 | 5.83    | 11.71 | 4  | 4   | 299 | 33.6 | 8.03 |
| Q9Y6K9 | NF-kappa-B essential modulator<br>OS=Homo sapiens<br>GN=IKBKG PE=1 SV=2 - [NEMO_HUMAN]                                  | 34.37 | 1 | 14 | 14 | 61  | 1.069 | 1.013 | 1.111 | 1.130 | 160.59  | 34.37 | 25 | 61  | 419 | 48.2 | 5.71 |
| O76064 | E3 ubiquitin-protein ligase RNF8<br>OS=Homo sapiens<br>GN=RNF8 PE=1 SV=1 - [RNF8_HUMAN]                                 | 2.27  | 1 | 1  | 1  | 1   | 1.167 | 0.851 | 2.017 | 1.130 | 1.94    | 2.27  | 1  | 1   | 485 | 55.5 | 7.33 |

|        |                                                                                                                            |       |   |    |    |     |       |       |       |       |        |       |    |     |      |       |      |
|--------|----------------------------------------------------------------------------------------------------------------------------|-------|---|----|----|-----|-------|-------|-------|-------|--------|-------|----|-----|------|-------|------|
| P39687 | Addic leucine-rich nuclear phosphoprotein 32 family member A<br>OS=Homo sapiens<br>GN=ANP32A<br>PE=1 SV=1 - [ANP32A_HUMAN] | 45.38 | 3 | 6  | 12 | 68  | 0.872 | 1.507 | 1.025 | 1.130 | 138.26 | 45.38 | 17 | 68  | 249  | 28.6  | 4.09 |
| Q9BRQ6 | MICOS complex subunit MIC25<br>OS=Homo sapiens<br>GN=CHCHD6<br>PE=1 SV=1 - [MIC25_HUMAN]                                   | 27.66 | 1 | 7  | 7  | 13  | 0.627 | 1.288 | 1.259 | 1.130 | 38.50  | 27.66 | 10 | 13  | 235  | 26.4  | 8.85 |
| Q13310 | Polyadenylate-binding protein 4<br>OS=Homo sapiens<br>GN=PABPC4<br>PE=1 SV=1 - [PABP4_HUMAN]                               | 33.54 | 3 | 13 | 22 | 114 | 1.043 | 1.003 | 0.953 | 1.131 | 273.88 | 33.54 | 37 | 114 | 644  | 70.7  | 9.26 |
| P78346 | Ribonuclease P protein subunit p30<br>OS=Homo sapiens<br>GN=RPP30<br>PE=1 SV=1 - [RPP30_HUMAN]                             | 5.60  | 1 | 1  | 1  | 1   | 0.874 | 0.750 | 0.793 | 1.131 | 2.07   | 5.60  | 1  | 1   | 268  | 29.3  | 8.91 |
| P57723 | Poly(rC)-binding protein 4<br>OS=Homo sapiens<br>GN=PCBP4<br>PE=2 SV=1 - [PCBP4_HUMAN]                                     | 4.71  | 1 | 1  | 2  | 10  | 0.642 | 0.689 | 0.664 | 1.131 | 19.35  | 4.71  | 3  | 10  | 403  | 41.5  | 8.16 |
| Q7R7Y7 | Ovochymase-1<br>OS=Homo sapiens<br>GN=OVCH1<br>PE=2 SV=2 - [OVCH1_HUMAN]                                                   | 1.15  | 1 | 1  | 1  | 1   | 0.576 | 0.612 | 0.753 | 1.131 | 0.00   | 1.15  | 1  | 1   | 1134 | 125.0 | 8.32 |
| Q8NEM8 | Cytosolic carboxypeptidase 3<br>OS=Homo sapiens<br>GN=AGBL3<br>PE=2 SV=2 - [CBPC3_HUMAN]                                   | 2.10  | 1 | 1  | 2  | 2   | 1.456 | 1.688 | 1.073 | 1.131 | 1.66   | 2.10  | 2  | 2   | 1001 | 115.9 | 8.79 |
| Q7LDY3 | Mitochondrial ribonuclease P protein 1<br>OS=Homo sapiens<br>GN=TRMT10C<br>PE=1 SV=2 - [MRRR1_HUMAN]                       | 25.31 | 1 | 9  | 9  | 26  | 0.912 | 1.251 | 0.988 | 1.131 | 52.35  | 25.31 | 13 | 26  | 403  | 47.3  | 9.36 |
| Q12849 | G-rich sequence factor 1<br>OS=Homo sapiens<br>GN=GRSF1<br>PE=1 SV=3 - [GRSF1_HUMAN]                                       | 20.42 | 1 | 6  | 6  | 20  | 0.803 | 1.098 | 1.252 | 1.131 | 59.40  | 20.42 | 9  | 20  | 480  | 53.1  | 6.19 |

|        |                                                                                                                              |       |   |    |    |    |       |       |       |       |       |       |    |    |      |       |      |
|--------|------------------------------------------------------------------------------------------------------------------------------|-------|---|----|----|----|-------|-------|-------|-------|-------|-------|----|----|------|-------|------|
| Q8IX12 | Cell division cycle and apoptosis regulator protein 1<br>OS=Homo sapiens<br>GN=CCAR1<br>PE=1 SV=2 - [CCAR1_HUMAN]            | 12.78 | 1 | 14 | 14 | 28 | 1.027 | 1.185 | 0.857 | 1.132 | 53.27 | 12.78 | 19 | 28 | 1150 | 132.7 | 5.76 |
| P20396 | Pro-thyrotropin-releasing hormone<br>OS=Homo sapiens<br>GN=TRH PE=1 SV=1 - [TRH_HUMAN]                                       | 8.68  | 1 | 1  | 1  | 1  | 1.291 | 1.022 | 0.866 | 1.132 | 0.00  | 8.68  | 1  | 1  | 242  | 27.4  | 5.45 |
| Q6ZRH7 | Cation channel sperm-associated protein subunit gamma<br>OS=Homo sapiens<br>GN=CATSPERG<br>PE=2 SV=3 - [CTSRG_HUMAN]         | 0.60  | 1 | 1  | 1  | 1  | 1.556 | 0.725 | 0.854 | 1.132 | 1.75  | 0.60  | 1  | 1  | 1159 | 132.9 | 6.37 |
| Q8TBC5 | Zinc finger and SCAN domain-containing protein 18<br>OS=Homo sapiens<br>GN=ZSCAN18<br>PE=2 SV=2 - [ZSC18_HUMAN]              | 3.53  | 1 | 2  | 2  | 3  | 1.166 | 1.393 | 1.056 | 1.132 | 7.01  | 3.53  | 3  | 3  | 510  | 54.8  | 4.82 |
| Q8IUR5 | Transmembrane and TPR repeat-containing protein 1<br>OS=Homo sapiens<br>GN=TMTC1<br>PE=1 SV=3 - [TMTC1_HUMAN]                | 1.93  | 1 | 2  | 2  | 5  | 2.642 | 0.562 | 0.586 | 1.132 | 15.01 | 1.93  | 4  | 5  | 882  | 98.8  | 8.84 |
| P34741 | Syndecan-2<br>OS=Homo sapiens<br>GN=SDC2<br>PE=1 SV=2 - [SDC2_HUMAN]                                                         | 11.94 | 1 | 2  | 2  | 12 | 1.717 | 0.676 | 1.174 | 1.132 | 20.97 | 11.94 | 3  | 12 | 201  | 22.1  | 4.86 |
| Q9H3H9 | Transcription elongation factor A protein-like 2<br>OS=Homo sapiens<br>GN=TCEAL2<br>PE=2 SV=1 - [TCAL2_HUMAN]                | 13.66 | 2 | 2  | 2  | 3  | 0.857 | 1.628 | 1.968 | 1.132 | 5.15  | 13.66 | 3  | 3  | 227  | 25.8  | 5.94 |
| Q6NYC1 | Bifunctional arginine demethylase and lysyl-hydroxylase<br>JMJD6<br>OS=Homo sapiens<br>GN=JMJD6<br>PE=1 SV=1 - [JMJD6_HUMAN] | 8.44  | 1 | 3  | 3  | 4  | 1.105 | 0.848 | 1.237 | 1.132 | 10.29 | 8.44  | 4  | 4  | 403  | 46.4  | 8.69 |

|        |                                                                                                                                               |       |   |   |   |    |       |       |       |       |       |       |    |    |      |       |      |
|--------|-----------------------------------------------------------------------------------------------------------------------------------------------|-------|---|---|---|----|-------|-------|-------|-------|-------|-------|----|----|------|-------|------|
| P48307 | Tissue factor pathway inhibitor 2<br>OS=Homo sapiens<br>GN=TFPI2<br>PE=1 SV=1 - [TFPI2_HUMAN]                                                 | 11.06 | 1 | 2 | 2 | 9  | 2.580 | 0.646 | 0.595 | 1.132 | 18.39 | 11.06 | 4  | 9  | 235  | 26.9  | 8.53 |
| Q9H013 | Disintegrin and metalloproteinase domain-containing protein 19<br>OS=Homo sapiens<br>GN=ADAM19<br>PE=1 SV=3 - [ADA19_HUMAN]                   | 1.05  | 1 | 1 | 1 | 1  | 0.562 | 0.928 | 1.951 | 1.132 | 1.78  | 1.05  | 1  | 1  | 955  | 104.9 | 8.35 |
| Q8WUD6 | Cholinephosphotransferase 1<br>OS=Homo sapiens<br>GN=CHPT1<br>PE=1 SV=1 - [CHPT1_HUMAN]                                                       | 2.96  | 1 | 1 | 1 | 2  | 1.049 | 0.858 | 1.316 | 1.132 | 5.30  | 2.96  | 1  | 2  | 406  | 45.1  | 6.92 |
| Q9P2Y5 | UV radiation resistance-associated gene protein<br>OS=Homo sapiens<br>GN=UVRAG<br>PE=1 SV=1 - [UVRAG_HUMAN]                                   | 1.00  | 1 | 1 | 1 | 1  | 1.737 | 0.644 | 0.857 | 1.132 | 2.16  | 1.00  | 1  | 1  | 699  | 78.1  | 8.29 |
| Q9UKA4 | A-kinase anchor protein 11<br>OS=Homo sapiens<br>GN=AKAP11<br>PE=1 SV=1 - [AKA11_HUMAN]                                                       | 2.26  | 1 | 4 | 4 | 8  | 0.626 | 0.784 | 0.927 | 1.132 | 18.00 | 2.26  | 5  | 8  | 1901 | 210.4 | 5.39 |
| Q8WXD9 | Caskin-1<br>OS=Homo sapiens<br>GN=CASKIN1<br>PE=1 SV=1 - [CSKI1_HUMAN]                                                                        | 0.56  | 1 | 1 | 1 | 2  | 1.065 | 1.095 | 0.983 | 1.132 | 5.17  | 0.56  | 1  | 2  | 1431 | 149.7 | 9.14 |
| Q7Z5R6 | Amyloid beta A4 precursor protein-binding family B member 1-interacting protein<br>OS=Homo sapiens<br>GN=APBB1IP<br>PE=1 SV=1 - [AB1IP_HUMAN] | 5.86  | 1 | 3 | 3 | 4  | 0.698 | 0.987 | 0.817 | 1.133 | 9.16  | 5.86  | 3  | 4  | 666  | 73.1  | 5.59 |
| Q8NIG2 | Cap-specific mRNA (nucleoside-2'-O-)-methyltransferase 1<br>OS=Homo sapiens<br>GN=CMTR1<br>PE=1 SV=1 - [CMTR1_HUMA]                           | 10.54 | 1 | 7 | 9 | 20 | 1.088 | 1.184 | 1.070 | 1.133 | 44.28 | 10.54 | 13 | 20 | 835  | 95.3  | 7.05 |

|        |                                                                                                                         |       |   |    |    |    |       |       |       |       |        |       |    |    |     |      |      |
|--------|-------------------------------------------------------------------------------------------------------------------------|-------|---|----|----|----|-------|-------|-------|-------|--------|-------|----|----|-----|------|------|
| P08237 | ATP-dependent 6-phosphofructokinase, muscle type OS=Homo sapiens<br>GN=PFKM<br>PE=1 SV=2 - [PFKAM_HUMAN]                | 28.46 | 2 | 17 | 19 | 60 | 1.292 | 1.003 | 0.908 | 1.133 | 167.81 | 28.46 | 28 | 60 | 780 | 85.1 | 7.99 |
| Q01546 | Keratin, type II cytoskeletal 2 oral OS=Homo sapiens<br>GN=KRT76<br>PE=1 SV=2 - [K22O_HUMAN]                            | 8.15  | 2 | 1  | 7  | 94 | 1.351 | 1.098 | 1.150 | 1.133 | 184.58 | 8.15  | 10 | 94 | 638 | 65.8 | 8.12 |
| Q6LXH9 | Inactive serine protease PAMR1 OS=Homo sapiens<br>GN=PAMR1<br>PE=1 SV=1 - [PAMR1_HUMAN]                                 | 1.53  | 1 | 1  | 1  | 1  | 0.971 | 0.779 | 1.248 | 1.134 | 2.27   | 1.53  | 1  | 1  | 720 | 80.1 | 7.46 |
| O95168 | NADH dehydrogenase [ubiquinone] 1 beta subcomplex subunit 4 OS=Homo sapiens<br>GN=NDUFB4<br>PE=1 SV=3 - [NDUB4_HUMAN]   | 43.41 | 1 | 5  | 6  | 12 | 0.723 | 0.980 | 0.716 | 1.134 | 33.73  | 43.41 | 8  | 12 | 129 | 15.2 | 9.85 |
| Q9H808 | Transducin-like enhancer protein 6 OS=Homo sapiens<br>GN=TLE6 PE=2 SV=2 - [TLE6_HUMAN]                                  | 2.10  | 1 | 1  | 1  | 1  | 0.580 | 0.695 | 0.938 | 1.134 | 1.93   | 2.10  | 1  | 1  | 572 | 63.4 | 6.15 |
| P16499 | Rod cGMP-specific 3',5'-cyclic phosphodiesterase subunit alpha OS=Homo sapiens<br>GN=PDE6A<br>PE=1 SV=4 - [PDE6A_HUMAN] | 0.81  | 1 | 1  | 1  | 2  | 1.325 | 0.919 | 0.955 | 1.134 | 2.93   | 0.81  | 1  | 2  | 860 | 99.5 | 5.72 |
| Q8IZ69 | tRNA (uracil-5-)-methyltransferase homolog A OS=Homo sapiens<br>GN=TRMT2A<br>PE=1 SV=2 - [TRM2A_HUMAN]                  | 4.80  | 1 | 2  | 2  | 3  | 0.925 | 0.892 | 0.861 | 1.134 | 9.26   | 4.80  | 3  | 3  | 625 | 68.7 | 7.94 |
| Q2TAL8 | Glutamine-rich protein 1 OS=Homo sapiens<br>GN=QRICH1<br>PE=1 SV=1 - [QRIC1_HUMAN]                                      | 5.80  | 1 | 4  | 5  | 17 | 1.045 | 1.131 | 0.941 | 1.134 | 32.06  | 5.80  | 8  | 17 | 776 | 86.4 | 5.87 |

|        |                                                                                                                                                                                        |       |   |    |    |     |       |       |       |       |        |       |    |     |     |      |       |
|--------|----------------------------------------------------------------------------------------------------------------------------------------------------------------------------------------|-------|---|----|----|-----|-------|-------|-------|-------|--------|-------|----|-----|-----|------|-------|
| P26885 | Peptidyl-prolyl<br>cis-trans<br>isomerase<br>FKBP2<br>OS=Homo<br>sapiens<br>GN=FKBP2<br>PE=1 SV=2 -<br>[FKBP2_HUMAN<br>]<br>Heterogeneous<br>nuclear<br>ribonucleoprot<br>ein C-like 3 | 50.00 | 1 | 11 | 11 | 66  | 1.124 | 0.989 | 0.976 | 1.134 | 146.99 | 50.00 | 17 | 66  | 142 | 15.6 | 9.13  |
| B7ZW38 | OS=Homo<br>sapiens<br>GN=HNRNPCL3<br>PE=2 SV=1 -<br>[HNRCL3_HUMAN<br>]<br>O-acetyl-ADP-<br>ribose<br>deacetylase 1                                                                     | 12.97 | 3 | 1  | 7  | 62  | 0.835 | 1.245 | 0.991 | 1.135 | 132.86 | 12.97 | 12 | 62  | 293 | 32.0 | 5.68  |
| Q9Y530 | OS=Homo<br>sapiens<br>GN=OARD1<br>PE=1 SV=2 -<br>[OARD1_HUMA<br>N]<br>Signal<br>peptidase<br>complex<br>subunit 3                                                                      | 17.11 | 1 | 2  | 3  | 6   | 1.495 | 1.668 | 1.021 | 1.135 | 12.84  | 17.11 | 4  | 6   | 152 | 17.0 | 8.31  |
| P61009 | OS=Homo<br>sapiens<br>GN=SPCS3<br>PE=1 SV=1 -<br>[SPCS3_HUMAN<br>]<br>Putative MAGE<br>domain-<br>containing<br>protein<br>MAGEA13P                                                    | 28.33 | 1 | 6  | 6  | 17  | 0.650 | 0.669 | 0.831 | 1.135 | 31.71  | 28.33 | 9  | 17  | 180 | 20.3 | 8.62  |
| A6NCF6 | OS=Homo<br>sapiens<br>GN=MAGEA13P<br>PE=5 SV=1 -<br>[MA13P_HUMA<br>N]<br>Neuferritin                                                                                                   | 2.93  | 1 | 1  | 1  | 1   | 1.122 | 0.615 | 0.518 | 1.136 | 2.83   | 2.93  | 1  | 1   | 341 | 37.9 | 6.37  |
| Q8WUJ1 | OS=Homo<br>sapiens<br>GN=CYB5D2<br>PE=2 SV=1 -<br>[NEUFC_HUMAN<br>]<br>Acetyl-CoA<br>acetyltransfera<br>se,<br>mitochondrial                                                           | 6.06  | 1 | 1  | 1  | 2   | 1.045 | 1.032 | 2.070 | 1.136 | 4.69   | 6.06  | 2  | 2   | 264 | 28.7 | 8.40  |
| P24752 | OS=Homo<br>sapiens<br>GN=ACAT1<br>PE=1 SV=1 -<br>[THIL_HUMAN]<br>Serine/arginine-<br>rich splicing<br>factor 11                                                                        | 36.07 | 1 | 18 | 18 | 144 | 1.112 | 1.616 | 1.182 | 1.136 | 348.43 | 36.07 | 31 | 144 | 427 | 45.2 | 8.85  |
| Q05519 | OS=Homo<br>sapiens<br>GN=SRSF11<br>PE=1 SV=1 -<br>[SRS11_HUMAN<br>]                                                                                                                    | 16.53 | 1 | 7  | 7  | 23  | 1.008 | 1.143 | 0.980 | 1.136 | 46.65  | 16.53 | 10 | 23  | 484 | 53.5 | 10.52 |

|        |                                                                                                                       |       |   |    |    |    |       |       |       |       |        |       |    |    |     |      |      |
|--------|-----------------------------------------------------------------------------------------------------------------------|-------|---|----|----|----|-------|-------|-------|-------|--------|-------|----|----|-----|------|------|
| P10636 | Microtubule-associated protein tau<br>OS=Homo sapiens<br>GN=MAPT<br>PE=1 SV=5 - [TAU_HUMAN]                           | 7.39  | 1 | 4  | 4  | 5  | 1.284 | 1.503 | 0.612 | 1.136 | 9.73   | 7.39  | 4  | 5  | 758 | 78.9 | 6.71 |
| O96008 | Mitochondrial import receptor subunit TOM40 homolog<br>OS=Homo sapiens<br>GN=TOMM40<br>PE=1 SV=1 - [TOM40_HUMAN]      | 16.62 | 1 | 5  | 5  | 31 | 1.135 | 0.775 | 0.623 | 1.136 | 69.72  | 16.62 | 10 | 31 | 361 | 37.9 | 7.25 |
| Q9H0W9 | Ester hydrolase C11orf54<br>OS=Homo sapiens<br>GN=C11orf54<br>PE=1 SV=1 - [CK054_HUMAN]                               | 20.95 | 1 | 6  | 6  | 14 | 1.514 | 1.178 | 0.913 | 1.137 | 27.86  | 20.95 | 9  | 14 | 315 | 35.1 | 6.70 |
| Q9Y3B2 | Exosome complex component CSL4<br>OS=Homo sapiens<br>GN=EXOSC1<br>PE=1 SV=1 - [EXOS1_HUMAN]                           | 8.21  | 1 | 1  | 1  | 1  | 1.050 | 0.960 | 0.913 | 1.137 | 4.65   | 8.21  | 1  | 1  | 195 | 21.4 | 8.24 |
| Q9H488 | GDP-fucose protein O-fucosyltransferase 1<br>OS=Homo sapiens<br>GN=POFUT1<br>PE=1 SV=1 - [OFUT1_HUMAN]                | 27.58 | 1 | 7  | 7  | 56 | 1.212 | 0.975 | 1.023 | 1.137 | 132.52 | 27.58 | 13 | 56 | 388 | 43.9 | 8.53 |
| O94903 | Proline synthase co-transcribed bacterial homolog protein<br>OS=Homo sapiens<br>GN=PROSC<br>PE=1 SV=1 - [PROSC_HUMAN] | 44.73 | 1 | 10 | 10 | 43 | 1.071 | 1.028 | 1.025 | 1.137 | 100.77 | 44.73 | 17 | 43 | 275 | 30.3 | 7.50 |
| Q9Y2X3 | Nudeolar protein 58<br>OS=Homo sapiens<br>GN=NOP58<br>PE=1 SV=1 - [NOP58_HUMAN]                                       | 37.81 | 1 | 16 | 16 | 58 | 0.843 | 1.042 | 0.846 | 1.137 | 169.93 | 37.81 | 25 | 58 | 529 | 59.5 | 8.92 |
| Q9H3K6 | BolA-like protein 2<br>OS=Homo sapiens<br>GN=BOLA2<br>PE=1 SV=1 - [BOLA2_HUMAN]                                       | 80.23 | 1 | 6  | 6  | 16 | 0.835 | 0.906 | 1.360 | 1.138 | 42.98  | 80.23 | 9  | 16 | 86  | 10.1 | 6.52 |



|        |                                                                                                                                                                          |       |   |    |    |    |       |       |       |       |       |       |    |    |      |       |       |
|--------|--------------------------------------------------------------------------------------------------------------------------------------------------------------------------|-------|---|----|----|----|-------|-------|-------|-------|-------|-------|----|----|------|-------|-------|
| P51784 | Ubiquitin<br>carboxyl-<br>terminal<br>hydrolase 11<br>OS=Homo<br>sapiens<br>GN=USP11<br>PE=1 SV=3 -<br>[UBP11_HUMAN<br>]<br>Nuclear pore<br>complex<br>protein<br>Nup107 | 6.65  | 1 | 6  | 7  | 16 | 0.955 | 0.831 | 0.985 | 1.138 | 47.81 | 6.65  | 9  | 16 | 963  | 109.7 | 5.45  |
| P57740 | OS=Homo<br>sapiens<br>GN=NUP107<br>PE=1 SV=1 -<br>[NU107_HUMAN<br><br>H/ACA<br>ribonucleoprot<br>ein complex<br>subunit 1                                                | 17.41 | 1 | 12 | 12 | 29 | 0.971 | 1.079 | 0.869 | 1.138 | 68.16 | 17.41 | 17 | 29 | 925  | 106.3 | 5.43  |
| Q9NY12 | OS=Homo<br>sapiens<br>GN=GAR1<br>PE=1 SV=1 -<br>[GAR1_HUMAN]                                                                                                             | 36.41 | 1 | 8  | 8  | 17 | 1.116 | 0.973 | 0.775 | 1.138 | 27.03 | 36.41 | 10 | 17 | 217  | 22.3  | 10.92 |
| Q08752 | Peptidyl-prolyl<br>cis-trans<br>isomerase D<br>OS=Homo<br>sapiens<br>GN=PPID PE=1<br>SV=3 -<br>[PPID_HUMAN]                                                              | 50.00 | 1 | 17 | 18 | 38 | 0.915 | 1.206 | 1.081 | 1.138 | 77.10 | 50.00 | 25 | 38 | 370  | 40.7  | 7.21  |
| O60518 | Ran-binding<br>protein 6<br>OS=Homo<br>sapiens<br>GN=RANBP6<br>PE=1 SV=2 -<br>[RANBP6_HUMAN<br>]<br>Heat shock<br>protein beta-2                                         | 4.52  | 2 | 5  | 6  | 15 | 1.115 | 1.007 | 1.406 | 1.138 | 34.08 | 4.52  | 7  | 15 | 1105 | 124.6 | 5.01  |
| Q16082 | OS=Homo<br>sapiens<br>GN=HSPB2<br>PE=1 SV=2 -<br>[HSPB2_HUMAN<br>]<br>Exonuclease 3'-<br>5' domain-<br>containing<br>protein 2                                           | 24.73 | 1 | 3  | 3  | 5  | 0.848 | 0.520 | 0.784 | 1.138 | 16.64 | 24.73 | 5  | 5  | 182  | 20.2  | 5.17  |
| Q9NVH0 | OS=Homo<br>sapiens<br>GN=EXD2<br>PE=1 SV=2 -<br>[EXD2_HUMAN]                                                                                                             | 9.18  | 1 | 6  | 6  | 15 | 0.843 | 0.916 | 1.091 | 1.138 | 35.09 | 9.18  | 9  | 15 | 621  | 70.3  | 8.32  |
| Q92552 | 28S ribosomal<br>protein S27,<br>mitochondrial<br>OS=Homo<br>sapiens<br>GN=MRPS27<br>PE=1 SV=3 -<br>[RT27_HUMAN]                                                         | 6.76  | 1 | 3  | 3  | 11 | 0.617 | 0.770 | 0.675 | 1.138 | 24.14 | 6.76  | 6  | 11 | 414  | 47.6  | 6.18  |
| Q9Y519 | Transmembran<br>e protein 184B<br>OS=Homo<br>sapiens<br>GN=TMEM184B<br>PE=1 SV=2 -<br>[T184B_HUMAN<br>]                                                                  | 1.72  | 1 | 1  | 1  | 2  | 1.003 | 0.383 | 0.535 | 1.138 | 4.50  | 1.72  | 2  | 2  | 407  | 45.5  | 6.89  |

|        |                                                                                                                             |       |   |    |    |     |       |       |       |       |        |       |    |     |      |       |      |
|--------|-----------------------------------------------------------------------------------------------------------------------------|-------|---|----|----|-----|-------|-------|-------|-------|--------|-------|----|-----|------|-------|------|
| P31942 | Heterogeneous nuclear ribonucleoprotein H3<br>OS=Homo sapiens<br>GN=HNRNPH3<br>PE=1 SV=2 - [HNRH3_HUMAN]                    | 35.55 | 2 | 7  | 9  | 84  | 1.186 | 1.104 | 1.054 | 1.138 | 248.08 | 35.55 | 15 | 84  | 346  | 36.9  | 6.87 |
| Q9UPN4 | Centrosomal protein of 131 kDa<br>OS=Homo sapiens<br>GN=CEP131<br>PE=1 SV=3 - [CP131_HUMAN]                                 | 4.43  | 1 | 4  | 5  | 16  | 0.836 | 1.625 | 1.027 | 1.139 | 40.96  | 4.43  | 6  | 16  | 1083 | 122.1 | 8.69 |
| Q86X76 | Nitrilase homolog 1<br>OS=Homo sapiens<br>GN=NIT1 PE=1 SV=2 - [NIT1_HUMAN]                                                  | 8.56  | 1 | 3  | 3  | 8   | 1.125 | 1.110 | 1.046 | 1.139 | 15.93  | 8.56  | 5  | 8   | 327  | 35.9  | 7.74 |
| Q70EL1 | Inactive ubiquitin carboxyl-terminal hydrolase 54<br>OS=Homo sapiens<br>GN=USP54<br>PE=1 SV=4 - [UBP54_HUMAN]               | 1.66  | 1 | 2  | 2  | 2   | 0.956 | 0.834 | 1.043 | 1.139 | 4.54   | 1.66  | 2  | 2   | 1684 | 187.3 | 7.28 |
| Q9H9P8 | L-2-hydroxyglutarate dehydrogenase, mitochondrial<br>OS=Homo sapiens<br>GN=L2HGDDH<br>PE=1 SV=3 - [L2HDH_HUMAN]             | 4.32  | 1 | 2  | 2  | 3   | 0.932 | 1.309 | 0.946 | 1.139 | 7.08   | 4.32  | 3  | 3   | 463  | 50.3  | 8.15 |
| Q9NYL2 | Mitogen-activated protein kinase kinase kinase<br>MLT OS=Homo sapiens<br>GN=ZAK PE=1 SV=3 - [MLTK_HUMAN]                    | 11.25 | 1 | 10 | 11 | 24  | 1.180 | 1.013 | 1.775 | 1.139 | 55.06  | 11.25 | 17 | 24  | 800  | 91.1  | 7.87 |
| Q86Y39 | NADH dehydrogenase [ubiquinone] 1 alpha subcomplex subunit 11<br>OS=Homo sapiens<br>GN=NDUFA11<br>PE=1 SV=3 - [NDUAB_HUMAN] | 19.86 | 1 | 2  | 2  | 4   | 0.740 | 0.591 | 1.349 | 1.139 | 11.09  | 19.86 | 3  | 4   | 141  | 14.8  | 8.72 |
| P16070 | CD44 antigen<br>OS=Homo sapiens<br>GN=CD44<br>PE=1 SV=3 - [CD44_HUMAN]                                                      | 16.58 | 1 | 15 | 15 | 374 | 1.773 | 0.744 | 1.041 | 1.139 | 785.22 | 16.58 | 26 | 374 | 742  | 81.5  | 5.33 |

|        |                                                                                                             |       |   |    |    |     |       |       |       |       |        |       |    |     |      |       |      |
|--------|-------------------------------------------------------------------------------------------------------------|-------|---|----|----|-----|-------|-------|-------|-------|--------|-------|----|-----|------|-------|------|
| Q08379 | Golgin subfamily A member 2<br>OS=Homo sapiens<br>GN=GO LGA2<br>PE=1 SV=3 - [GO LGA2_HUMAN]                 | 24.65 | 2 | 22 | 23 | 73  | 0.997 | 0.956 | 1.001 | 1.139 | 150.83 | 24.65 | 36 | 73  | 1002 | 113.0 | 5.02 |
| Q9C0A0 | Contactin-associated protein-like 4<br>OS=Homo sapiens<br>GN=CN TNAP4<br>PE=1 SV=3 - [CN TP4_HUMAN]         | 2.37  | 1 | 2  | 3  | 19  | 1.364 | 0.714 | 1.074 | 1.139 | 30.60  | 2.37  | 4  | 19  | 1308 | 145.2 | 6.68 |
| Q9H0U4 | Ras-related protein Rab-1B<br>OS=Homo sapiens<br>GN=RAB1B<br>PE=1 SV=1 - [RAB1B_HUMAN]                      | 81.09 | 3 | 7  | 17 | 114 | 1.295 | 1.178 | 1.039 | 1.139 | 277.26 | 81.09 | 27 | 114 | 201  | 22.2  | 5.73 |
| P52948 | Nuclear pore complex protein Nup98-Nup96<br>OS=Homo sapiens<br>GN=NUP98<br>PE=1 SV=4 - [NUP98_HUMAN]        | 17.34 | 1 | 28 | 28 | 88  | 1.156 | 1.130 | 0.842 | 1.139 | 190.42 | 17.34 | 48 | 88  | 1817 | 197.5 | 6.40 |
| Q8WYQ9 | Zinc finger CCHC domain-containing protein 14<br>OS=Homo sapiens<br>GN=ZCCHC14<br>PE=2 SV=1 - [ZCH14_HUMAN] | 0.74  | 1 | 1  | 1  | 1   | 1.249 | 1.324 | 1.214 | 1.140 | 2.02   | 0.74  | 1  | 1   | 949  | 100.0 | 8.18 |
| Q9Y2U8 | Inner nuclear membrane protein Man1<br>OS=Homo sapiens<br>GN=LEMD3<br>PE=1 SV=2 - [MAN1_HUMAN]              | 10.76 | 1 | 6  | 7  | 11  | 1.080 | 0.882 | 0.969 | 1.140 | 24.16  | 10.76 | 9  | 11  | 911  | 99.9  | 7.55 |
| Q9H9F9 | Actin-related protein 5<br>OS=Homo sapiens<br>GN=ACTR5<br>PE=1 SV=2 - [ARP5_HUMAN]                          | 1.15  | 1 | 1  | 1  | 2   | 0.863 | 0.863 | 0.659 | 1.140 | 4.60   | 1.15  | 1  | 2   | 607  | 68.3  | 5.27 |
| Q86T26 | Transmembrane protease serine 11B<br>OS=Homo sapiens<br>GN=TM PRSS11B<br>PE=2 SV=3 - [TM11B_HUMAN]          | 1.44  | 1 | 1  | 1  | 1   | 1.149 | 1.192 | 1.004 | 1.140 | 2.28   | 1.44  | 1  | 1   | 416  | 46.3  | 8.85 |
| P36542 | ATP synthase subunit gamma, mitochondrial<br>OS=Homo sapiens<br>GN=ATP5C1<br>PE=1 SV=1 - [ATPG_HUMAN]       | 29.87 | 1 | 11 | 12 | 66  | 1.274 | 0.892 | 0.686 | 1.140 | 166.70 | 29.87 | 19 | 66  | 298  | 33.0  | 9.22 |

|        |                                                                                                           |       |   |    |    |     |       |       |       |       |        |       |    |     |      |       |       |
|--------|-----------------------------------------------------------------------------------------------------------|-------|---|----|----|-----|-------|-------|-------|-------|--------|-------|----|-----|------|-------|-------|
| Q9H2A2 | Aldehyde dehydrogenase family 8 member A1<br>OS=Homo sapiens<br>GN=ALDH8A1<br>PE=1 SV=1 - [ALDH8A1_HUMAN] | 2.87  | 1 | 1  | 2  | 4   | 1.219 | 0.736 | 2.545 | 1.140 | 8.72   | 2.87  | 2  | 4   | 487  | 53.4  | 7.14  |
| Q8IWD4 | Coiled-coil domain-containing protein 117<br>OS=Homo sapiens<br>GN=CCDC117<br>PE=1 SV=1 - [CC117_HUMAN]   | 3.94  | 1 | 1  | 1  | 3   | 0.847 | 0.888 | 0.621 | 1.140 | 6.87   | 3.94  | 2  | 3   | 279  | 30.5  | 5.07  |
| Q15428 | Splicing factor 3A subunit 2<br>OS=Homo sapiens<br>GN=SF3A2<br>PE=1 SV=2 - [SF3A2_HUMAN]                  | 5.82  | 1 | 3  | 3  | 11  | 1.256 | 1.147 | 1.109 | 1.140 | 30.67  | 5.82  | 5  | 11  | 464  | 49.2  | 9.64  |
| Q13423 | NAD(P) transhydrogenase, mitochondrial<br>OS=Homo sapiens<br>GN=NNT PE=1 SV=3 - [NNTM_HUMAN]              | 34.07 | 1 | 39 | 40 | 132 | 1.030 | 1.191 | 0.868 | 1.141 | 312.16 | 34.07 | 61 | 132 | 1086 | 113.8 | 8.09  |
| O00746 | Nucleoside diphosphate kinase, mitochondrial<br>OS=Homo sapiens<br>GN=NME4<br>PE=1 SV=1 - [NDKM_HUMAN]    | 20.32 | 1 | 4  | 4  | 6   | 0.758 | 1.085 | 1.050 | 1.141 | 14.21  | 20.32 | 6  | 6   | 187  | 20.6  | 10.29 |
| O00267 | Transcription elongation factor SPT5<br>OS=Homo sapiens<br>GN=SUPT5H<br>PE=1 SV=1 - [SPT5H_HUMAN]         | 14.90 | 1 | 13 | 13 | 39  | 1.120 | 1.056 | 1.019 | 1.141 | 96.37  | 14.90 | 22 | 39  | 1087 | 120.9 | 5.06  |
| P15153 | Ras-related C3 botulinum toxin substrate 2<br>OS=Homo sapiens<br>GN=RAC2<br>PE=1 SV=1 - [RAC2_HUMAN]      | 24.48 | 2 | 1  | 6  | 64  | 0.916 | 0.844 | 0.598 | 1.141 | 149.61 | 24.48 | 10 | 64  | 192  | 21.4  | 7.61  |
| P37235 | Hippocaldin-like protein 1<br>OS=Homo sapiens<br>GN=HPCAL1<br>PE=1 SV=3 - [HPCL1_HUMAN]                   | 36.79 | 3 | 7  | 7  | 40  | 1.329 | 0.594 | 0.692 | 1.141 | 86.68  | 36.79 | 13 | 40  | 193  | 22.3  | 5.35  |

|        |                                                                                                                   |       |   |    |    |    |       |       |       |       |        |       |    |    |      |       |       |
|--------|-------------------------------------------------------------------------------------------------------------------|-------|---|----|----|----|-------|-------|-------|-------|--------|-------|----|----|------|-------|-------|
| Q8NCU8 | Uncharacterized protein encoded by LINC00116<br>OS=Homo sapiens<br>GN=LINC00116<br>PE=1 SV=1 - [YB039_HUMAN]      | 4.35  | 1 | 1  | 1  | 4  | 0.860 | 0.808 | 0.517 | 1.141 | 8.30   | 4.35  | 1  | 4  | 138  | 15.6  | 11.19 |
| P24928 | DNA-directed RNA polymerase II subunit RPB1<br>OS=Homo sapiens<br>GN=POLR2A<br>PE=1 SV=2 - [RPB1_HUMAN]           | 13.45 | 1 | 25 | 25 | 47 | 0.935 | 1.191 | 0.937 | 1.141 | 100.96 | 13.45 | 35 | 47 | 1970 | 217.0 | 7.37  |
| Q969T7 | 7-methylguanosine phosphate-specific 5'-nucleotidase<br>OS=Homo sapiens<br>GN=NT5C3B<br>PE=1 SV=4 - [SNT3B_HUMAN] | 9.67  | 1 | 3  | 3  | 12 | 1.124 | 1.052 | 1.106 | 1.141 | 24.52  | 9.67  | 6  | 12 | 300  | 34.4  | 6.38  |
| Q9P258 | Protein RCC2<br>OS=Homo sapiens<br>GN=RCC2<br>PE=1 SV=2 - [RCC2_HUMAN]                                            | 6.51  | 1 | 4  | 4  | 14 | 0.850 | 1.324 | 0.851 | 1.141 | 33.91  | 6.51  | 8  | 14 | 522  | 56.0  | 8.78  |
| P31146 | Coronin-1A<br>OS=Homo sapiens<br>GN=CORO1A<br>PE=1 SV=4 - [COR1A_HUMAN]                                           | 4.99  | 1 | 1  | 2  | 3  | 0.774 | 1.843 | 1.693 | 1.141 | 5.45   | 4.99  | 2  | 3  | 461  | 51.0  | 6.68  |
| Q9Y3L3 | SH3 domain-binding protein 1<br>OS=Homo sapiens<br>GN=SH3BP1<br>PE=1 SV=3 - [3BP1_HUMAN]                          | 16.55 | 1 | 11 | 11 | 30 | 0.705 | 0.809 | 1.120 | 1.141 | 74.64  | 16.55 | 14 | 30 | 701  | 75.7  | 6.77  |
| Q86UX6 | Serine/threonine-protein kinase 32C<br>OS=Homo sapiens<br>GN=STK32C<br>PE=1 SV=1 - [ST32C_HUMAN]                  | 4.32  | 1 | 1  | 1  | 1  | 1.240 | 1.180 | 1.329 | 1.142 | 0.00   | 4.32  | 1  | 1  | 486  | 55.0  | 6.61  |
| Q8IY33 | MICAL-like protein 2<br>OS=Homo sapiens<br>GN=MICAL2<br>PE=1 SV=1 - [MILK2_HUMAN]                                 | 23.56 | 2 | 17 | 17 | 42 | 1.959 | 1.041 | 1.655 | 1.142 | 97.57  | 23.56 | 24 | 42 | 904  | 97.4  | 9.57  |
| Q5T3I0 | G patch domain-containing protein 4<br>OS=Homo sapiens<br>GN=GPATCH4<br>PE=1 SV=2 - [GPTC4_HUMAN]                 | 5.61  | 1 | 2  | 2  | 3  | 0.601 | 0.868 | 0.991 | 1.142 | 3.90   | 5.61  | 3  | 3  | 446  | 50.4  | 9.63  |

|        |                                                                                                                  |       |   |    |    |    |       |       |       |       |        |       |    |    |     |      |       |
|--------|------------------------------------------------------------------------------------------------------------------|-------|---|----|----|----|-------|-------|-------|-------|--------|-------|----|----|-----|------|-------|
| P62877 | E3 ubiquitin-protein ligase<br>RBX1<br>OS=Homo sapiens<br>GN=RBX1<br>PE=1 SV=1 - [RBX1_HUMAN]                    | 12.96 | 1 | 2  | 2  | 4  | 3.115 | 1.565 | 1.346 | 1.142 | 8.50   | 12.96 | 3  | 4  | 108 | 12.3 | 6.96  |
| Q9UGH3 | Solute carrier family 23 member 2<br>OS=Homo sapiens<br>GN=SLC23A2<br>PE=1 SV=1 - [S23A2_HUMAN]                  | 6.31  | 1 | 2  | 3  | 3  | 3.804 |       | 0.355 | 1.142 | 9.09   | 6.31  | 3  | 3  | 650 | 70.3 | 7.68  |
| Q9UQ88 | Cyclin-dependent kinase 11A<br>OS=Homo sapiens<br>GN=CDK11A<br>PE=1 SV=4 - [CD11A_HUMAN]                         | 4.60  | 2 | 4  | 4  | 22 | 0.925 | 1.224 | 0.951 | 1.142 | 35.00  | 4.60  | 6  | 22 | 783 | 91.3 | 5.36  |
| Q9BW92 | Threonine--tRNA ligase, mitochondrial<br>OS=Homo sapiens<br>GN=TARS2<br>PE=1 SV=1 - [SYTM_HUMAN]                 | 5.85  | 1 | 5  | 5  | 8  | 0.869 | 1.758 | 1.277 | 1.142 | 21.44  | 5.85  | 7  | 8  | 718 | 81.0 | 7.30  |
| Q9Y3Y2 | Chromatin target of PRMT1 protein<br>OS=Homo sapiens<br>GN=CHTOP<br>PE=1 SV=2 - [CHTOP_HUMAN]                    | 21.37 | 1 | 5  | 5  | 34 | 1.231 | 1.323 | 1.177 | 1.143 | 54.16  | 21.37 | 9  | 34 | 248 | 26.4 | 12.23 |
| Q9BQ70 | Transcription factor 25<br>OS=Homo sapiens<br>GN=TCF25<br>PE=1 SV=1 - [TCF25_HUMAN]                              | 14.79 | 1 | 8  | 8  | 23 | 1.033 | 1.026 | 1.053 | 1.143 | 43.93  | 14.79 | 14 | 23 | 676 | 76.6 | 6.35  |
| Q9Y262 | Eukaryotic translation initiation factor 3 subunit L<br>OS=Homo sapiens<br>GN=EIF3L<br>PE=1 SV=1 - [EIF3L_HUMAN] | 43.44 | 1 | 24 | 24 | 88 | 0.823 | 0.757 | 0.821 | 1.143 | 204.68 | 43.44 | 43 | 88 | 564 | 66.7 | 6.34  |
| P35869 | Aryl hydrocarbon receptor<br>OS=Homo sapiens<br>GN=AHR PE=1 SV=2 - [AHR_HUMAN]                                   | 1.30  | 1 | 1  | 1  | 2  | 0.577 | 0.892 | 0.261 | 1.143 | 0.00   | 1.30  | 2  | 2  | 848 | 96.1 | 6.38  |

|        |                                                                                                                             |       |   |    |    |     |       |       |       |       |        |       |    |     |      |       |      |
|--------|-----------------------------------------------------------------------------------------------------------------------------|-------|---|----|----|-----|-------|-------|-------|-------|--------|-------|----|-----|------|-------|------|
| O14672 | Disintegrin and metalloproteinase domain-containing protein 10<br>OS=Homo sapiens<br>GN=ADAM10<br>PE=1 SV=1 - [ADA10_HUMAN] | 20.32 | 1 | 13 | 13 | 42  | 1.160 | 0.551 | 0.782 | 1.143 | 101.66 | 20.32 | 20 | 42  | 748  | 84.1  | 7.77 |
| Q9NSA3 | Beta-catenin-interacting protein 1<br>OS=Homo sapiens<br>GN=CTNBP1<br>PE=1 SV=1 - [CNBP1_HUMAN]                             | 18.52 | 1 | 2  | 2  | 7   | 1.123 | 0.834 | 1.324 | 1.143 | 19.99  | 18.52 | 4  | 7   | 81   | 9.2   | 5.41 |
| P35241 | Radixin<br>OS=Homo sapiens<br>GN=RDX PE=1 SV=1 - [RADI_HUMAN]                                                               | 53.34 | 1 | 25 | 42 | 343 | 1.049 | 1.054 | 0.906 | 1.143 | 771.25 | 53.34 | 68 | 343 | 583  | 68.5  | 6.37 |
| Q8TF42 | Ubiquitin-associated and SH3 domain-containing protein B<br>OS=Homo sapiens<br>GN=UBASH3B<br>PE=1 SV=2 - [UBS3B_HUMAN]      | 5.39  | 1 | 3  | 3  | 12  | 0.843 | 0.983 | 0.991 | 1.143 | 24.91  | 5.39  | 6  | 12  | 649  | 72.6  | 6.93 |
| O95140 | Mitofusin-2<br>OS=Homo sapiens<br>GN=MFN2<br>PE=1 SV=3 - [MFN2_HUMAN]                                                       | 12.29 | 1 | 7  | 7  | 12  | 0.944 | 0.952 | 1.028 | 1.144 | 26.11  | 12.29 | 10 | 12  | 757  | 86.3  | 6.98 |
| Q8NBN7 | Retinol dehydrogenase 13<br>OS=Homo sapiens<br>GN=RDH13<br>PE=1 SV=2 - [RDH13_HUMAN]                                        | 3.02  | 1 | 1  | 1  | 3   | 0.818 | 1.245 | 1.207 | 1.144 | 6.72   | 3.02  | 2  | 3   | 331  | 35.9  | 8.10 |
| Q9ULH0 | Kinase D-interacting substrate of 220 kDa<br>OS=Homo sapiens<br>GN=KIDINS220<br>PE=1 SV=3 - [KDIS_HUMAN]                    | 6.27  | 1 | 8  | 8  | 16  | 1.080 | 0.860 | 1.079 | 1.144 | 35.09  | 6.27  | 13 | 16  | 1771 | 196.4 | 6.62 |
| Q9GZL7 | Ribosome biogenesis protein WDR12<br>OS=Homo sapiens<br>GN=WDR12<br>PE=1 SV=2 - [WDR12_HUMAN]                               | 9.22  | 1 | 4  | 4  | 4   | 0.984 | 1.332 | 0.913 | 1.144 | 7.97   | 9.22  | 4  | 4   | 423  | 47.7  | 5.90 |
| Q15459 | Splicing factor 3A subunit 1<br>OS=Homo sapiens<br>GN=SF3A1<br>PE=1 SV=1 - [SF3A1_HUMAN]                                    | 37.96 | 2 | 29 | 30 | 105 | 1.123 | 1.257 | 0.891 | 1.144 | 250.62 | 37.96 | 45 | 105 | 793  | 88.8  | 5.22 |

|        |                                                                                                                                               |       |   |    |    |    |       |       |       |       |       |       |    |    |     |      |      |
|--------|-----------------------------------------------------------------------------------------------------------------------------------------------|-------|---|----|----|----|-------|-------|-------|-------|-------|-------|----|----|-----|------|------|
| Q9Y2X7 | ARF GTPase-activating protein GIT1<br>OS=Homo sapiens<br>GN=GIT1 PE=1<br>SV=2 -<br>[GIT1_HUMAN]                                               | 20.37 | 1 | 11 | 14 | 42 | 1.204 | 1.189 | 1.074 | 1.144 | 99.64 | 20.37 | 22 | 42 | 761 | 84.3 | 6.80 |
| Q9Y223 | Bifunctional UDP-N-acetylglucosamine 2-epimerase/N-acetylmannosamine kinase<br>OS=Homo sapiens<br>GN=GNE PE=1<br>SV=1 -<br>[GLCNE_HUMAN]      | 8.45  | 1 | 5  | 5  | 11 | 1.025 | 0.890 | 1.248 | 1.144 | 25.27 | 8.45  | 8  | 11 | 722 | 79.2 | 6.80 |
| Q9UKG9 | Peroxisomal carnitine O-octanoyltransferase<br>OS=Homo sapiens<br>GN=CROT<br>PE=1 SV=2 -<br>[OCTC_HUMAN]                                      | 15.03 | 1 | 10 | 10 | 23 | 0.754 | 1.144 | 1.255 | 1.144 | 48.06 | 15.03 | 16 | 23 | 612 | 70.1 | 7.08 |
| Q9UHR4 | Brain-specific angiogenesis inhibitor 1-associated protein 2-like protein 1<br>OS=Homo sapiens<br>GN=BAIAP2L1<br>PE=1 SV=2 -<br>[BI2L1_HUMAN] | 10.96 | 1 | 4  | 5  | 9  | 0.822 | 0.890 | 0.929 | 1.144 | 14.75 | 10.96 | 8  | 9  | 511 | 56.8 | 8.68 |
| O43353 | Receptor-interacting serine/threonine-protein kinase 2<br>OS=Homo sapiens<br>GN=RIPK2<br>PE=1 SV=2 -<br>[RIPK2_HUMAN]                         | 17.96 | 1 | 8  | 8  | 12 | 0.864 | 0.731 | 0.609 | 1.144 | 35.30 | 17.96 | 9  | 12 | 540 | 61.2 | 7.09 |
| Q9H7B2 | Ribosome production factor 2 homolog<br>OS=Homo sapiens<br>GN=RPF2<br>PE=1 SV=2 -<br>[RPF2_HUMAN]                                             | 18.30 | 1 | 9  | 9  | 17 | 0.796 | 1.120 | 0.980 | 1.144 | 34.29 | 18.30 | 11 | 17 | 306 | 35.6 | 9.99 |
| P46926 | Glucosamine-6-phosphate isomerase 1<br>OS=Homo sapiens<br>GN=GNPDA1<br>PE=1 SV=1 -<br>[GNP11_HUMAN]                                           | 26.99 | 1 | 6  | 8  | 24 | 0.789 | 0.880 | 0.926 | 1.145 | 43.68 | 26.99 | 13 | 24 | 289 | 32.6 | 6.92 |



|        |                                                                                                                           |       |   |    |    |    |       |       |       |       |       |       |    |    |      |       |       |
|--------|---------------------------------------------------------------------------------------------------------------------------|-------|---|----|----|----|-------|-------|-------|-------|-------|-------|----|----|------|-------|-------|
| Q9UG01 | Intraflagellar transport protein 172 homolog<br>OS=Homo sapiens<br>GN=IFT172<br>PE=1 SV=2 - [IF172_HUMAN]                 | 1.89  | 1 | 2  | 2  | 2  | 0.464 | 0.897 | 1.052 | 1.145 | 8.13  | 1.89  | 2  | 2  | 1749 | 197.5 | 6.13  |
| O75792 | Ribonuclease H2 subunit A<br>OS=Homo sapiens<br>GN=RNASEH2A<br>PE=1 SV=2 - [RNH2A_HUMAN]                                  | 14.38 | 1 | 4  | 4  | 11 | 0.840 | 1.363 | 1.055 | 1.145 | 32.96 | 14.38 | 4  | 11 | 299  | 33.4  | 5.25  |
| P55774 | C-C motif chemokine 18<br>OS=Homo sapiens<br>GN=CCL18<br>PE=1 SV=1 - [CCL18_HUMAN]                                        | 12.36 | 1 | 1  | 1  | 2  | 2.034 | 1.502 | 0.913 | 1.145 | 5.66  | 12.36 | 1  | 2  | 89   | 9.8   | 8.75  |
| Q8TC12 | Retinol dehydrogenase 11<br>OS=Homo sapiens<br>GN=RDH11<br>PE=1 SV=2 - [RDH11_HUMAN]                                      | 16.98 | 1 | 4  | 4  | 15 | 1.417 | 0.887 | 0.804 | 1.145 | 27.33 | 16.98 | 7  | 15 | 318  | 35.4  | 8.82  |
| Q96M96 | FYVE, RhoGEF and PH domain-containing protein 4<br>OS=Homo sapiens<br>GN=FGD4<br>PE=1 SV=2 - [FGD4_HUMAN]                 | 26.37 | 1 | 16 | 16 | 38 | 0.926 | 0.867 | 1.309 | 1.145 | 93.11 | 26.37 | 25 | 38 | 766  | 86.6  | 6.13  |
| Q86T90 | Uncharacterized protein KIAA1328<br>OS=Homo sapiens<br>GN=KIAA1328<br>PE=1 SV=2 - [K1328_HUMAN]                           | 5.20  | 2 | 3  | 4  | 15 | 0.850 | 0.639 | 0.873 | 1.145 | 24.75 | 5.20  | 4  | 15 | 577  | 65.3  | 8.09  |
| Q9HBQ1 | Cdc42 effector protein 4<br>OS=Homo sapiens<br>GN=CDC42EP4<br>PE=1 SV=1 - [BORG4_HUMAN]                                   | 12.08 | 1 | 4  | 4  | 10 | 1.184 | 1.353 | 1.157 | 1.146 | 15.72 | 12.08 | 7  | 10 | 356  | 38.0  | 5.19  |
| O95182 | NADH dehydrogenase [ubiquinone] 1 alpha subcomplex subunit 7<br>OS=Homo sapiens<br>GN=NDUFA7<br>PE=1 SV=3 - [NDUA7_HUMAN] | 72.57 | 1 | 9  | 9  | 25 | 0.728 | 1.077 | 0.812 | 1.146 | 64.16 | 72.57 | 16 | 25 | 113  | 12.5  | 10.18 |

|        |                                                                                                                  |       |   |    |    |     |       |       |       |       |        |       |    |     |      |       |      |
|--------|------------------------------------------------------------------------------------------------------------------|-------|---|----|----|-----|-------|-------|-------|-------|--------|-------|----|-----|------|-------|------|
| P18846 | Cyclic AMP-dependent transcription factor ATF-1<br>OS=Homo sapiens<br>GN=ATF1<br>PE=1 SV=2 - [ATF1_HUMAN]        | 5.54  | 1 | 1  | 2  | 5   | 0.898 | 0.956 | 0.752 | 1.146 | 8.90   | 5.54  | 3  | 5   | 271  | 29.2  | 8.37 |
| O75410 | Transforming acidic coiled-coil-containing protein 1<br>OS=Homo sapiens<br>GN=TACC1<br>PE=1 SV=2 - [TACC1_HUMAN] | 16.40 | 1 | 10 | 12 | 34  | 1.103 | 1.524 | 1.271 | 1.147 | 90.03  | 16.40 | 18 | 34  | 805  | 87.7  | 4.88 |
| Q9HDC9 | Adipocyte plasma membrane-associated protein<br>OS=Homo sapiens<br>GN=APMAP<br>PE=1 SV=2 - [APMAP_HUMAN]         | 55.53 | 1 | 19 | 20 | 131 | 0.992 | 0.950 | 0.819 | 1.147 | 295.99 | 55.53 | 32 | 131 | 416  | 46.5  | 6.16 |
| P30305 | M-phase inducer phosphatase 2<br>OS=Homo sapiens<br>GN=CDC25B<br>PE=1 SV=2 - [MPIP2_HUMAN]                       | 1.38  | 1 | 1  | 1  | 1   | 0.848 | 0.350 | 1.682 | 1.147 | 1.62   | 1.38  | 1  | 1   | 580  | 64.9  | 6.40 |
| Q8N2F6 | Armadillo repeat-containing protein 10<br>OS=Homo sapiens<br>GN=ARMC10<br>PE=1 SV=1 - [ARM10_HUMAN]              | 15.74 | 1 | 5  | 5  | 9   | 0.724 | 1.736 | 0.861 | 1.147 | 11.93  | 15.74 | 9  | 9   | 343  | 37.5  | 6.61 |
| Q9NZM3 | Intersectin-2<br>OS=Homo sapiens<br>GN=ITSN2<br>PE=1 SV=3 - [ITSN2_HUMAN]                                        | 9.07  | 2 | 12 | 15 | 27  | 1.070 | 1.516 | 1.184 | 1.147 | 63.84  | 9.07  | 21 | 27  | 1697 | 193.3 | 8.12 |
| P21796 | Voltage-dependent anion-selective channel protein 1<br>OS=Homo sapiens<br>GN=VDAC1<br>PE=1 SV=2 - [VDAC1_HUMAN]  | 71.73 | 1 | 14 | 16 | 178 | 0.888 | 0.822 | 0.775 | 1.147 | 532.71 | 71.73 | 28 | 178 | 283  | 30.8  | 8.54 |
| Q9NX24 | H/ACA ribonucleoprotein complex subunit 2<br>OS=Homo sapiens<br>GN=NHP2<br>PE=1 SV=1 - [NHP2_HUMAN]              | 37.91 | 1 | 4  | 4  | 23  | 1.092 | 1.117 | 1.017 | 1.147 | 61.05  | 37.91 | 7  | 23  | 153  | 17.2  | 8.22 |

|        |                                                                                                                                                   |       |   |   |   |   |       |       |       |       |       |       |   |   |      |       |      |
|--------|---------------------------------------------------------------------------------------------------------------------------------------------------|-------|---|---|---|---|-------|-------|-------|-------|-------|-------|---|---|------|-------|------|
| Q9Y238 | Deleted in lung and esophageal cancer protein<br>1 OS=Homo sapiens<br>GN=DLEC1<br>PE=2 SV=2 - [DLEC1_HUMAN<br>Runt-related transcription factor 1 | 0.63  | 1 | 1 | 1 | 1 | 1.186 | 1.286 | 1.219 | 1.147 | 0.00  | 0.63  | 1 | 1 | 1755 | 195.6 | 6.33 |
| Q01196 | OS=Homo sapiens<br>GN=RUNX1<br>PE=1 SV=3 - [RUNX1_HUMAN<br>]                                                                                      | 6.40  | 1 | 2 | 2 | 3 | 0.743 | 1.102 | 1.145 | 1.147 | 8.74  | 6.40  | 3 | 3 | 453  | 48.7  | 9.35 |
| Q8N612 | FTS and Hook-interacting protein<br>OS=Homo sapiens<br>GN=FAM160A2<br>PE=1 SV=3 - [F16A2_HUMAN<br>]                                               | 2.26  | 1 | 1 | 1 | 1 | 0.859 | 0.967 | 1.046 | 1.147 | 6.16  | 2.26  | 1 | 1 | 972  | 105.5 | 6.77 |
| Q9P0P0 | E3 ubiquitin-protein ligase<br>RNF181<br>OS=Homo sapiens<br>GN=RNF181<br>PE=1 SV=1 - [RNF181_HUMAN<br>]                                           | 11.11 | 1 | 2 | 2 | 5 | 0.535 | 1.004 | 1.233 | 1.147 | 10.69 | 11.11 | 3 | 5 | 153  | 17.9  | 5.06 |
| Q9H9H4 | Vacuolar protein sorting-associated protein 37B<br>OS=Homo sapiens<br>GN=VPS37B<br>PE=1 SV=1 - [VP37B_HUMAN<br>]                                  | 9.47  | 1 | 2 | 2 | 2 | 0.822 | 1.551 | 0.934 | 1.147 | 0.00  | 9.47  | 2 | 2 | 285  | 31.3  | 7.34 |
| Q9BX69 | Caspase recruitment domain-containing protein 6<br>OS=Homo sapiens<br>GN=CARD6<br>PE=1 SV=2 - [CARD6_HUMAN<br>]                                   | 1.16  | 1 | 1 | 1 | 2 | 0.333 | 1.479 | 0.882 | 1.147 | 6.35  | 1.16  | 1 | 2 | 1037 | 116.4 | 6.37 |
| Q8NAF0 | Zinc finger protein 579<br>OS=Homo sapiens<br>GN=ZNF579<br>PE=1 SV=2 - [ZNF579_HUMAN<br>]                                                         | 1.60  | 1 | 1 | 1 | 1 | 1.086 | 0.925 | 1.143 | 1.147 | 1.80  | 1.60  | 1 | 1 | 562  | 60.5  | 8.69 |
| Q8TAM2 | Tetratricopeptide repeat protein 8<br>OS=Homo sapiens<br>GN=TTC8<br>PE=1 SV=2 - [TTC8_HUMAN<br>]                                                  | 1.29  | 1 | 1 | 1 | 1 | 0.923 | 1.366 | 1.357 | 1.148 | 0.00  | 1.29  | 1 | 1 | 541  | 61.5  | 6.80 |

|        |                                                                                                                                                     |       |   |    |    |     |       |       |       |       |        |       |    |     |      |       |      |
|--------|-----------------------------------------------------------------------------------------------------------------------------------------------------|-------|---|----|----|-----|-------|-------|-------|-------|--------|-------|----|-----|------|-------|------|
| P51948 | CDK-activating<br>kinase assembly<br>factor MAT1<br>OS=Homo<br>sapiens<br>GN=MNAT1<br>PE=1 SV=1 -<br>[MAT1_HUMAN]                                   | 10.36 | 1 | 4  | 4  | 11  | 1.050 | 1.291 | 1.013 | 1.148 | 9.98   | 10.36 | 5  | 11  | 309  | 35.8  | 6.09 |
| O96000 | NADH<br>dehydrogenase<br>[ubiquinone] 1<br>beta<br>subcomplex<br>subunit 10<br>OS=Homo<br>sapiens<br>GN=NDUFB10<br>PE=1 SV=3 -<br>[NDUBA_HUMAN<br>] | 34.88 | 1 | 6  | 6  | 21  | 0.928 | 1.070 | 0.977 | 1.148 | 48.71  | 34.88 | 10 | 21  | 172  | 20.8  | 8.48 |
| Q96QU8 | Exportin-6<br>OS=Homo<br>sapiens<br>GN=XPO6<br>PE=1 SV=1 -<br>[XPO6_HUMAN]                                                                          | 3.29  | 1 | 4  | 4  | 9   | 1.170 | 0.663 | 0.671 | 1.148 | 17.12  | 3.29  | 6  | 9   | 1125 | 128.8 | 6.35 |
| O95881 | Thioredoxin<br>domain-<br>containing<br>protein 12<br>OS=Homo<br>sapiens<br>GN=TXNDC12<br>PE=1 SV=1 -<br>[TXD12_HUMAN<br>]                          | 40.12 | 1 | 6  | 6  | 67  | 0.944 | 0.827 | 0.799 | 1.148 | 135.21 | 40.12 | 11 | 67  | 172  | 19.2  | 5.40 |
| Q99613 | Eukaryotic<br>translation<br>initiation factor<br>3 subunit C<br>OS=Homo<br>sapiens<br>GN=EIF3C<br>PE=1 SV=1 -<br>[EIF3C_HUMAN<br>]                 | 26.94 | 3 | 26 | 26 | 178 | 0.846 | 0.940 | 0.970 | 1.148 | 344.39 | 26.94 | 42 | 178 | 913  | 105.3 | 5.68 |
| Q2M215 | Keratin, type I<br>cytoskeletal 24<br>OS=Homo<br>sapiens<br>GN=KRT24<br>PE=1 SV=1 -<br>[K1C24_HUMAN<br>]                                            | 16.95 | 5 | 3  | 5  | 22  | 1.507 | 1.240 | 1.439 | 1.148 | 34.05  | 16.95 | 7  | 22  | 525  | 55.1  | 4.96 |
| P30084 | Enoyl-CoA<br>hydratase,<br>mitochondrial<br>OS=Homo<br>sapiens<br>GN=ECHS1<br>PE=1 SV=4 -<br>[ECHM_HUMAN]                                           | 52.41 | 1 | 17 | 17 | 73  | 1.068 | 1.260 | 1.131 | 1.148 | 169.90 | 52.41 | 28 | 73  | 290  | 31.4  | 8.07 |
| P36915 | Guanine<br>nucleotide-<br>binding protein-<br>like 1<br>OS=Homo<br>sapiens<br>GN=GNL1 PE=1<br>SV=2 -<br>[GNL1_HUMAN]                                | 18.78 | 1 | 11 | 11 | 40  | 1.088 | 1.089 | 0.999 | 1.149 | 109.83 | 18.78 | 18 | 40  | 607  | 68.6  | 5.80 |

|        |                                                                                                                      |       |   |    |    |    |       |       |       |       |        |       |    |    |     |       |      |
|--------|----------------------------------------------------------------------------------------------------------------------|-------|---|----|----|----|-------|-------|-------|-------|--------|-------|----|----|-----|-------|------|
| O43293 | Death-associated protein kinase 3<br>OS=Homo sapiens<br>GN=DAPK3<br>PE=1 SV=1 - [DAPK3_HUMAN]                        | 31.06 | 2 | 11 | 12 | 94 | 1.615 | 0.797 | 1.488 | 1.149 | 260.84 | 31.06 | 22 | 94 | 454 | 52.5  | 6.89 |
| P16519 | Neuroendocrine convertase 2<br>OS=Homo sapiens<br>GN=PCSK2<br>PE=2 SV=2 - [NEC2_HUMAN]                               | 7.05  | 1 | 3  | 3  | 3  | 1.234 | 1.143 | 0.960 | 1.149 | 4.91   | 7.05  | 3  | 3  | 638 | 70.5  | 6.49 |
| P51398 | 28S ribosomal protein S29, mitochondrial<br>OS=Homo sapiens<br>GN=DAP3<br>PE=1 SV=1 - [RT29_HUMAN]                   | 24.12 | 1 | 9  | 9  | 19 | 0.787 | 1.012 | 0.884 | 1.149 | 46.83  | 24.12 | 11 | 19 | 398 | 45.5  | 8.88 |
| Q13405 | 39S ribosomal protein L49, mitochondrial<br>OS=Homo sapiens<br>GN=MRPL49<br>PE=1 SV=1 - [RM49_HUMAN]                 | 36.75 | 1 | 6  | 6  | 17 | 0.993 | 1.367 | 1.141 | 1.149 | 42.14  | 36.75 | 8  | 17 | 166 | 19.2  | 9.45 |
| Q14CX7 | N-alpha-acetyltransferase 25, NatB auxiliary subunit<br>OS=Homo sapiens<br>GN=NAA25<br>PE=1 SV=1 - [NAA25_HUMAN]     | 5.86  | 1 | 7  | 7  | 14 | 1.014 | 1.105 | 1.088 | 1.149 | 23.71  | 5.86  | 11 | 14 | 972 | 112.2 | 6.64 |
| Q9NYJ8 | TGF-beta-activated kinase 1 and MAP3K7-binding protein 2<br>OS=Homo sapiens<br>GN=TAB2<br>PE=1 SV=1 - [TAB2_HUMAN]   | 6.20  | 1 | 3  | 4  | 6  | 0.757 | 1.225 | 1.146 | 1.149 | 7.98   | 6.20  | 5  | 6  | 693 | 76.4  | 8.54 |
| P0CAP2 | DNA-directed RNA polymerase II subunit<br>GRINL1A<br>OS=Homo sapiens<br>GN=POLR2M<br>PE=1 SV=1 - [GRL1A_HUMAN]       | 2.99  | 2 | 1  | 1  | 1  | 0.958 | 1.217 | 1.121 | 1.150 | 1.81   | 2.99  | 1  | 1  | 368 | 41.7  | 6.39 |
| Q13011 | Delta(3,5)-Delta(2,4)-dienoyl-CoA isomerase, mitochondrial<br>OS=Homo sapiens<br>GN=ECH1<br>PE=1 SV=2 - [ECH1_HUMAN] | 58.23 | 1 | 15 | 15 | 70 | 1.268 | 1.249 | 1.211 | 1.150 | 200.08 | 58.23 | 21 | 70 | 328 | 35.8  | 8.00 |

|        |                                                                                                                          |       |   |   |   |    |       |       |       |       |       |       |    |    |      |       |      |
|--------|--------------------------------------------------------------------------------------------------------------------------|-------|---|---|---|----|-------|-------|-------|-------|-------|-------|----|----|------|-------|------|
| Q16610 | Extracellular matrix protein 1 OS=Homo sapiens<br>GN=ECM1<br>PE=1 SV=2 - [ECM1_HUMAN]                                    | 17.59 | 1 | 8 | 8 | 20 | 1.326 | 0.884 | 1.003 | 1.150 | 52.17 | 17.59 | 13 | 20 | 540  | 60.6  | 6.71 |
| A4FU49 | SH3 domain-containing protein 21 OS=Homo sapiens<br>GN=SH3D21<br>PE=2 SV=2 - [SH321_HUMAN]                               | 3.91  | 1 | 2 | 2 | 2  | 1.314 | 1.160 | 0.894 | 1.150 | 4.09  | 3.91  | 2  | 2  | 640  | 70.5  | 5.76 |
| Q9UI26 | Importin-11 OS=Homo sapiens<br>GN=IPO11<br>PE=1 SV=1 - [IPO11_HUMAN]                                                     | 2.05  | 1 | 2 | 2 | 4  | 0.909 | 1.162 | 1.072 | 1.150 | 9.60  | 2.05  | 3  | 4  | 975  | 112.5 | 5.25 |
| A0JNW5 | UHRF1-binding protein 1-like OS=Homo sapiens<br>GN=UHRF1BP1L<br>PE=1 SV=2 - [UH1BL_HUMAN]                                | 7.86  | 1 | 9 | 9 | 15 | 1.108 | 0.935 | 0.821 | 1.150 | 33.05 | 7.86  | 13 | 15 | 1464 | 164.1 | 6.32 |
| O14827 | Ras-specific guanine nucleotide-releasing factor 2 OS=Homo sapiens<br>GN=RASGRF2<br>PE=1 SV=2 - [RGRF2_HUMAN]            | 2.10  | 1 | 3 | 3 | 3  | 1.484 | 1.406 | 1.131 | 1.151 | 7.59  | 2.10  | 3  | 3  | 1237 | 140.7 | 7.53 |
| P60604 | Ubiquitin-conjugating enzyme E2 G2 OS=Homo sapiens<br>GN=UBE2G2<br>PE=1 SV=1 - [UB2G2_HUMAN]                             | 41.82 | 1 | 4 | 4 | 7  | 1.067 | 0.844 | 0.911 | 1.151 | 20.20 | 41.82 | 5  | 7  | 165  | 18.6  | 4.70 |
| Q9UHD1 | Cysteine and histidine-rich domain-containing protein 1 OS=Homo sapiens<br>GN=CHORDC1<br>PE=1 SV=2 - [CHRD1_HUMAN]       | 32.53 | 1 | 8 | 8 | 11 | 0.767 | 0.841 | 1.138 | 1.151 | 29.71 | 32.53 | 11 | 11 | 332  | 37.5  | 7.87 |
| Q6QNY1 | Biogenesis of lysosome-related organelles complex 1 subunit 2 OS=Homo sapiens<br>GN=BLOC1S2<br>PE=1 SV=1 - [BL1S2_HUMAN] | 4.23  | 1 | 1 | 1 | 1  | 0.930 | 1.119 | 1.342 | 1.151 | 2.23  | 4.23  | 1  | 1  | 142  | 16.0  | 4.86 |

|        |                                                                                                                                       |       |   |    |    |     |       |       |       |       |         |       |    |     |      |       |      |
|--------|---------------------------------------------------------------------------------------------------------------------------------------|-------|---|----|----|-----|-------|-------|-------|-------|---------|-------|----|-----|------|-------|------|
| P41219 | Peripherin<br>OS=Homo sapiens<br>GN=PRPH<br>PE=1 SV=2 -<br>[PERI_HUMAN]                                                               | 14.26 | 2 | 2  | 9  | 411 | 1.371 | 0.992 | 1.233 | 1.151 | 1004.59 | 14.26 | 15 | 411 | 470  | 53.6  | 5.47 |
| Q9UGQ2 | Calcium channel flower homolog<br>OS=Homo sapiens<br>GN=CACFD1<br>PE=2 SV=1 -<br>[FLOWR_HUMAN]                                        | 5.23  | 1 | 1  | 1  | 1   | 1.082 | 1.366 | 0.952 | 1.151 | 0.00    | 5.23  | 1  | 1   | 172  | 18.5  | 5.44 |
| Q9UL15 | BAG family molecular chaperone regulator 5<br>OS=Homo sapiens<br>GN=BAG5<br>PE=1 SV=1 -<br>[BAG5_HUMAN]                               | 13.65 | 2 | 5  | 6  | 22  | 1.016 | 0.841 | 1.030 | 1.151 | 54.60   | 13.65 | 10 | 22  | 447  | 51.2  | 6.05 |
| Q3LXA3 | Bifunctional ATP-dependent dihydroxyacetone kinase/FAD-AMP lyase (cyclizing)<br>OS=Homo sapiens<br>GN=DAK PE=1 SV=2 -<br>[DHAK_HUMAN] | 18.26 | 1 | 8  | 8  | 42  | 1.037 | 1.136 | 1.191 | 1.151 | 111.69  | 18.26 | 14 | 42  | 575  | 58.9  | 7.49 |
| Q9HI18 | Activating signal co-integrator 1 complex subunit 2<br>OS=Homo sapiens<br>GN=ASCC2<br>PE=1 SV=3 -<br>[ASCC2_HUMAN]                    | 13.74 | 1 | 9  | 9  | 23  | 1.119 | 0.940 | 1.140 | 1.152 | 67.75   | 13.74 | 13 | 23  | 757  | 86.3  | 5.16 |
| Q8NCX0 | Coiled-coil domain-containing protein 150<br>OS=Homo sapiens<br>GN=CCDC150<br>PE=2 SV=2 -<br>[CC150_HUMAN]                            | 4.45  | 2 | 4  | 6  | 7   | 1.332 | 1.012 | 1.871 | 1.152 | 12.78   | 4.45  | 6  | 7   | 1101 | 128.7 | 7.02 |
| P0DMQ5 | Putative transmembrane protein INAFM2<br>OS=Homo sapiens<br>GN=INAFM2<br>PE=2 SV=1 -<br>[INAM2_HUMAN]                                 | 7.19  | 1 | 1  | 1  | 2   | 1.256 | 1.186 | 0.982 | 1.152 | 2.25    | 7.19  | 1  | 2   | 153  | 15.4  | 9.31 |
| P49585 | Choline-phosphate cytidyltransferase A<br>OS=Homo sapiens<br>GN=PCYT1A<br>PE=1 SV=2 -<br>[PCY1A_HUMAN]                                | 59.13 | 2 | 18 | 18 | 67  | 0.929 | 1.024 | 1.165 | 1.152 | 176.95  | 59.13 | 30 | 67  | 367  | 41.7  | 7.25 |

|        |                                                                                                                                                                                      |       |   |    |    |     |       |       |       |       |         |       |    |     |      |       |      |
|--------|--------------------------------------------------------------------------------------------------------------------------------------------------------------------------------------|-------|---|----|----|-----|-------|-------|-------|-------|---------|-------|----|-----|------|-------|------|
| P98170 | E3 ubiquitin-protein ligase XIAP<br>OS=Homo sapiens<br>GN=XIAP PE=1 SV=2 - [XIAP_HUMAN]                                                                                              | 11.87 | 1 | 5  | 5  | 16  | 0.890 | 1.220 | 1.489 | 1.152 | 42.11   | 11.87 | 8  | 16  | 497  | 56.6  | 6.65 |
| Q13188 | Serine/threonine-protein kinase 3<br>OS=Homo sapiens<br>GN=STK3 PE=1 SV=2 - [STK3_HUMAN]<br>Heat shock 70 kDa protein 1-like OS=Homo sapiens<br>GN=HSPA1L PE=1 SV=2 - [HSPA1L_HUMAN] | 16.29 | 1 | 5  | 7  | 21  | 0.951 | 1.105 | 1.045 | 1.152 | 51.73   | 16.29 | 9  | 21  | 491  | 56.3  | 5.24 |
| P34931 | ANI-type zinc finger protein 5 OS=Homo sapiens<br>GN=ZFAND5 PE=1 SV=1 - [ZFAND5_HUMAN]                                                                                               | 31.36 | 1 | 1  | 19 | 587 | 0.763 | 0.761 | 0.776 | 1.152 | 1288.25 | 31.36 | 35 | 587 | 641  | 70.3  | 6.02 |
| O76080 | Cholesteryl ester transfer protein<br>OS=Homo sapiens<br>GN=CETP PE=1 SV=2 - [CETP_HUMAN]                                                                                            | 4.23  | 1 | 1  | 1  | 1   | 0.979 |       | 0.923 | 1.152 | 2.18    | 4.23  | 1  | 1   | 213  | 23.1  | 8.51 |
| P11597 | Threonine synthase-like 1<br>OS=Homo sapiens<br>GN=THNSL1 PE=1 SV=2 - [THNSL1_HUMAN]                                                                                                 | 3.04  | 1 | 1  | 1  | 1   | 1.127 | 1.065 | 1.153 | 1.152 | 2.54    | 3.04  | 1  | 1   | 493  | 54.7  | 6.09 |
| Q8IYQ7 | Nuclear receptor corepressor 2<br>OS=Homo sapiens<br>GN=NCOR2 PE=1 SV=2 - [NCOR2_HUMAN]                                                                                              | 3.50  | 1 | 3  | 3  | 8   | 0.964 | 1.475 | 1.183 | 1.152 | 11.06   | 3.50  | 5  | 8   | 743  | 83.0  | 7.12 |
| Q9Y618 | Dihydropyridine-residue acetyltransferase component of pyruvate dehydrogenase complex, mitochondrial<br>OS=Homo sapiens<br>GN=DLAT PE=1 SV=3 - [ODP2_HUMAN]                          | 2.02  | 1 | 4  | 5  | 9   | 0.906 | 1.137 | 1.112 | 1.153 | 21.87   | 2.02  | 8  | 9   | 2525 | 274.6 | 7.59 |
| P10515 | Ubiquitin-like protein 4A<br>OS=Homo sapiens<br>GN=UBL4A PE=1 SV=1 - [UBL4A_HUMAN]                                                                                                   | 24.11 | 1 | 12 | 12 | 47  | 1.196 | 1.094 | 0.886 | 1.153 | 95.30   | 24.11 | 21 | 47  | 647  | 69.0  | 7.84 |
| P11441 |                                                                                                                                                                                      | 33.12 | 1 | 6  | 6  | 25  | 1.216 | 1.278 | 1.151 | 1.153 | 47.09   | 33.12 | 7  | 25  | 157  | 17.8  | 8.66 |



|        |                                                                                                                                                                                                                   |       |   |    |    |     |       |       |       |       |        |       |    |     |     |       |      |
|--------|-------------------------------------------------------------------------------------------------------------------------------------------------------------------------------------------------------------------|-------|---|----|----|-----|-------|-------|-------|-------|--------|-------|----|-----|-----|-------|------|
| Q9BUJ2 | Heterogeneous nuclear ribonucleoprotein U-like protein 1<br>OS=Homo sapiens<br>GN=HNRNPUL1<br>PE=1 SV=2 - [HNRUL_HUMAN<br>Glutathione S-transferase Mu 4 OS=Homo sapiens<br>GN=GSTM4<br>PE=1 SV=3 - [GSTM4_HUMAN] | 24.42 | 1 | 18 | 18 | 67  | 1.142 | 1.430 | 1.078 | 1.153 | 187.65 | 24.42 | 29 | 67  | 856 | 95.7  | 6.92 |
| Q03013 | Breast cancer anti-estrogen resistance protein 1<br>OS=Homo sapiens<br>GN=BCAR1<br>PE=1 SV=2 - [BCAR1_HUMAN]                                                                                                      | 55.05 | 1 | 3  | 14 | 114 | 2.615 | 0.786 | 1.095 | 1.153 | 313.27 | 55.05 | 23 | 114 | 218 | 25.5  | 5.90 |
| P56945 | Testis-expressed sequence 10 protein<br>OS=Homo sapiens<br>GN=TEX10<br>PE=1 SV=2 - [TEX10_HUMAN]                                                                                                                  | 21.15 | 1 | 12 | 13 | 36  | 0.969 | 0.753 | 1.228 | 1.154 | 118.88 | 21.15 | 20 | 36  | 870 | 93.3  | 5.67 |
| Q9NXF1 | Leucine zipper protein 4<br>OS=Homo sapiens<br>GN=LUZP4<br>PE=2 SV=1 - [LUZP4_HUMAN]                                                                                                                              | 10.44 | 1 | 8  | 9  | 14  | 1.019 | 0.955 | 0.834 | 1.154 | 30.92  | 10.44 | 12 | 14  | 929 | 105.6 | 9.36 |
| Q9P127 | ADP-ribosylation factor GTPase-activating protein 2<br>OS=Homo sapiens<br>GN=ARFGAP2<br>PE=1 SV=1 - [ARFG2_HUMAN]                                                                                                 | 2.88  | 1 | 1  | 1  | 1   | 1.035 | 0.920 | 1.558 | 1.154 | 3.61   | 2.88  | 1  | 1   | 313 | 35.9  | 9.45 |
| Q8N6H7 | Charged multivesicular body protein 4a<br>OS=Homo sapiens<br>GN=CHMP4A<br>PE=1 SV=3 - [CHM4A_HUMAN]                                                                                                               | 23.03 | 1 | 11 | 11 | 30  | 0.905 | 1.070 | 1.114 | 1.154 | 60.69  | 23.03 | 17 | 30  | 521 | 56.7  | 7.99 |
| Q9BY43 | Tetrapeptide repeat protein 13<br>OS=Homo sapiens<br>GN=TTC13<br>PE=2 SV=3 - [TTC13_HUMAN]                                                                                                                        | 31.98 | 1 | 6  | 7  | 23  | 0.838 | 1.107 | 1.192 | 1.154 | 62.07  | 31.98 | 10 | 23  | 222 | 25.1  | 4.70 |
| Q8NBPO |                                                                                                                                                                                                                   | 6.98  | 1 | 6  | 6  | 11  | 1.115 | 1.093 | 0.851 | 1.154 | 21.39  | 6.98  | 8  | 11  | 860 | 96.8  | 7.01 |

|        |                                                                                                                        |       |   |    |    |    |       |       |       |       |        |       |    |    |      |       |       |
|--------|------------------------------------------------------------------------------------------------------------------------|-------|---|----|----|----|-------|-------|-------|-------|--------|-------|----|----|------|-------|-------|
| Q9H6R7 | WD repeat-containing protein C2orf44<br>OS=Homo sapiens<br>GN=C2orf44<br>PE=1 SV=1 - [CB044_HUMAN]                     | 0.97  | 1 | 1  | 1  | 3  | 0.650 | 0.877 | 1.160 | 1.154 | 6.46   | 0.97  | 2  | 3  | 721  | 79.1  | 6.70  |
| Q13620 | Cullin-4B<br>OS=Homo sapiens<br>GN=CUL4B<br>PE=1 SV=4 - [CUL4B_HUMAN]                                                  | 23.88 | 1 | 13 | 24 | 69 | 1.026 | 1.207 | 1.019 | 1.154 | 116.32 | 23.88 | 37 | 69 | 913  | 103.9 | 7.37  |
| Q9UQ35 | Serine/arginine repetitive matrix protein 2<br>OS=Homo sapiens<br>GN=SRRM2<br>PE=1 SV=2 - [SRRM2_HUMAN]                | 12.68 | 1 | 26 | 26 | 78 | 0.924 | 1.162 | 0.976 | 1.154 | 170.71 | 12.68 | 40 | 78 | 2752 | 299.4 | 12.06 |
| Q9Y2X9 | Zinc finger protein 281<br>OS=Homo sapiens<br>GN=ZNF281<br>PE=1 SV=1 - [ZNF281_HUMAN]                                  | 4.92  | 1 | 2  | 2  | 2  | 1.780 | 1.338 | 0.899 | 1.154 | 0.00   | 4.92  | 2  | 2  | 895  | 96.9  | 8.48  |
| Q12857 | Nuclear factor 1 A-type<br>OS=Homo sapiens<br>GN=NFIA PE=1 SV=2 - [NFIA_HUMAN]                                         | 6.29  | 1 | 2  | 3  | 4  | 0.626 | 2.471 | 1.719 | 1.154 | 8.23   | 6.29  | 3  | 4  | 509  | 55.9  | 8.44  |
| Q9UMS4 | Pre-mRNA-processing factor 19<br>OS=Homo sapiens<br>GN=PRPF19<br>PE=1 SV=1 - [PRPF19_HUMAN]                            | 17.86 | 1 | 9  | 9  | 50 | 1.151 | 1.166 | 0.951 | 1.154 | 108.37 | 17.86 | 15 | 50 | 504  | 55.1  | 6.61  |
| Q92623 | Tetrapeptide repeat protein 9A<br>OS=Homo sapiens<br>GN=TTC9<br>PE=2 SV=3 - [TTC9A_HUMAN]                              | 8.11  | 1 | 2  | 2  | 2  | 1.827 | 2.082 | 2.272 | 1.154 | 5.33   | 8.11  | 2  | 2  | 222  | 24.4  | 8.98  |
| P34947 | G protein-coupled receptor kinase 5<br>OS=Homo sapiens<br>GN=GRK5<br>PE=1 SV=1 - [GRK5_HUMAN]                          | 15.76 | 1 | 7  | 7  | 10 | 1.630 | 0.846 | 0.615 | 1.154 | 17.94  | 15.76 | 9  | 10 | 590  | 67.7  | 8.10  |
| Q14728 | Major facilitator superfamily domain-containing protein 10<br>OS=Homo sapiens<br>GN=MFS10<br>PE=2 SV=1 - [MFS10_HUMAN] | 4.40  | 1 | 2  | 2  | 8  | 0.963 | 0.902 | 0.899 | 1.154 | 15.76  | 4.40  | 3  | 8  | 455  | 48.3  | 9.60  |

|        |                                                                                                                                       |       |   |    |    |     |       |       |       |       |        |       |    |     |     |      |       |
|--------|---------------------------------------------------------------------------------------------------------------------------------------|-------|---|----|----|-----|-------|-------|-------|-------|--------|-------|----|-----|-----|------|-------|
| Q96A32 | Myosin<br>regulatory light<br>chain 2,<br>skeletal muscle<br>isoform<br>OS=Homo<br>sapiens<br>GN=MYLPF<br>PE=2 SV=1 -<br>[MLRS_HUMAN] | 13.61 | 1 | 2  | 2  | 5   | 1.184 | 1.204 | 1.332 | 1.155 | 7.96   | 13.61 | 3  | 5   | 169 | 19.0 | 5.01  |
| Q9NPH0 | Lysophosphatidi<br>c acid<br>phosphatase<br>type 6<br>OS=Homo<br>sapiens<br>GN=ACP6<br>PE=1 SV=2 -<br>[PPA6_HUMAN]                    | 3.50  | 1 | 1  | 1  | 7   | 0.945 | 1.618 | 1.176 | 1.155 | 11.41  | 3.50  | 2  | 7   | 428 | 48.8 | 6.47  |
| O95831 | Apoptosis-<br>inducing factor<br>1,<br>mitochondrial<br>OS=Homo<br>sapiens<br>GN=AIFM1<br>PE=1 SV=1 -<br>[AIFM1_HUMAN]                | 30.51 | 1 | 19 | 19 | 49  | 1.024 | 1.255 | 0.895 | 1.155 | 120.87 | 30.51 | 25 | 49  | 613 | 66.9 | 8.95  |
| Q658P3 | Metalloreducta<br>se STEAP3<br>OS=Homo<br>sapiens<br>GN=STEAP3<br>PE=1 SV=2 -<br>[STEA3_HUMAN<br>]                                    | 7.38  | 1 | 3  | 3  | 6   | 1.572 | 0.719 | 1.316 | 1.155 | 23.29  | 7.38  | 4  | 6   | 488 | 54.6 | 8.60  |
| Q02040 | A-kinase<br>anchor protein<br>17A OS=Homo<br>sapiens<br>GN=AKAP17A<br>PE=1 SV=2 -<br>[AK17A_HUMAN<br>]                                | 4.75  | 1 | 3  | 3  | 10  | 0.793 | 0.929 | 0.974 | 1.155 | 20.05  | 4.75  | 6  | 10  | 695 | 80.7 | 9.73  |
| O75152 | Zinc finger<br>CCCH domain-<br>containing<br>protein 11A<br>OS=Homo<br>sapiens<br>GN=ZC3H11A<br>PE=1 SV=3 -<br>[ZC11A_HUMAN<br>]      | 13.95 | 1 | 9  | 10 | 31  | 1.077 | 1.057 | 1.024 | 1.155 | 90.84  | 13.95 | 12 | 31  | 810 | 89.1 | 8.37  |
| P26599 | Polypyrimidine<br>tract-binding<br>protein 1<br>OS=Homo<br>sapiens<br>GN=PTBP1<br>PE=1 SV=1 -<br>[PTBP1_HUMAN<br>]                    | 32.39 | 1 | 8  | 11 | 67  | 1.144 | 1.043 | 0.888 | 1.155 | 193.97 | 32.39 | 16 | 67  | 531 | 57.2 | 9.17  |
| P62753 | 40S ribosomal<br>protein S6<br>OS=Homo<br>sapiens<br>GN=RPS6<br>PE=1 SV=1 -<br>[RS6_HUMAN]                                            | 38.15 | 1 | 15 | 16 | 124 | 0.839 | 1.151 | 1.034 | 1.155 | 338.99 | 38.15 | 26 | 124 | 249 | 28.7 | 10.84 |

|        |                                                                                                                                                         |       |   |     |     |     |       |       |       |       |        |       |     |     |      |       |       |
|--------|---------------------------------------------------------------------------------------------------------------------------------------------------------|-------|---|-----|-----|-----|-------|-------|-------|-------|--------|-------|-----|-----|------|-------|-------|
| Q9H9A7 | RecQ-mediated genome instability protein 1<br>OS=Homo sapiens<br>GN=RMI1<br>PE=1 SV=3 - [RMI1_HUMAN]                                                    | 3.04  | 1 | 2   | 2   | 2   | 1.729 | 0.437 | 0.478 | 1.155 | 2.24   | 3.04  | 2   | 2   | 625  | 70.1  | 4.96  |
| Q17R98 | Zinc finger protein 827<br>OS=Homo sapiens<br>GN=ZNF827<br>PE=2 SV=1 - [ZNF827_HUMAN]                                                                   | 1.94  | 1 | 1   | 1   | 1   | 2.172 | 0.990 | 1.445 | 1.155 | 2.13   | 1.94  | 1   | 1   | 1081 | 119.1 | 6.89  |
| P62269 | 40S ribosomal protein S18<br>OS=Homo sapiens<br>GN=RPS18<br>PE=1 SV=3 - [RS18_HUMAN]                                                                    | 49.34 | 1 | 12  | 12  | 59  | 0.865 | 1.042 | 0.983 | 1.155 | 125.48 | 49.34 | 16  | 59  | 152  | 17.7  | 10.99 |
| P53597 | Succinyl-CoA ligase [ADP/GDP-forming] subunit alpha, mitochondrial<br>OS=Homo sapiens<br>GN=SUCLG1<br>PE=1 SV=4 - [SUCA_HUMAN]                          | 20.81 | 1 | 8   | 8   | 55  | 1.107 | 1.184 | 1.113 | 1.155 | 144.51 | 20.81 | 16  | 55  | 346  | 36.2  | 8.79  |
| P78527 | DNA-dependent protein kinase catalytic subunit<br>OS=Homo sapiens<br>GN=PRKDC<br>PE=1 SV=3 - [PRKDC_HUMAN<br>Spermatid perinuclear RNA-binding protein] | 27.74 | 1 | 109 | 110 | 417 | 1.100 | 1.060 | 0.824 | 1.155 | 983.65 | 27.74 | 175 | 417 | 4128 | 468.8 | 7.12  |
| Q96S19 | Sideroflexin-5<br>OS=Homo sapiens<br>GN=STRBP<br>PE=1 SV=1 - [STRBP_HUMAN]                                                                              | 10.42 | 1 | 2   | 7   | 42  | 0.980 | 0.749 | 1.071 | 1.155 | 102.43 | 10.42 | 11  | 42  | 672  | 73.6  | 8.72  |
| Q8TD22 | Gem-associated protein 6<br>OS=Homo sapiens<br>GN=GEMIN6<br>PE=1 SV=1 - [GEM16_HUMAN]                                                                   | 5.99  | 1 | 1   | 1   | 4   | 0.505 | 1.488 | 0.943 | 1.156 | 13.70  | 5.99  | 1   | 4   | 167  | 18.8  | 5.12  |
| O14684 | Prostaglandin E synthase<br>OS=Homo sapiens<br>GN=PTGES<br>PE=1 SV=2 - [PTGES_HUMAN]                                                                    | 7.24  | 1 | 2   | 2   | 8   | 2.418 | 0.475 | 0.582 | 1.156 | 19.73  | 7.24  | 4   | 8   | 152  | 17.1  | 9.50  |

|        |                                                                                                                                                                                                                                                                                                                                                                                                                                                                                                                                                                                                                                                                                                                                                                                                                                                                 |       |   |    |    |     |       |       |       |       |         |       |    |     |      |       |      |
|--------|-----------------------------------------------------------------------------------------------------------------------------------------------------------------------------------------------------------------------------------------------------------------------------------------------------------------------------------------------------------------------------------------------------------------------------------------------------------------------------------------------------------------------------------------------------------------------------------------------------------------------------------------------------------------------------------------------------------------------------------------------------------------------------------------------------------------------------------------------------------------|-------|---|----|----|-----|-------|-------|-------|-------|---------|-------|----|-----|------|-------|------|
| Q8N3C0 | Activating signal cointegrator 1 complex subunit 3<br>OS=Homo sapiens<br>GN=ASCC3<br>PE=1 SV=3 - [ASCC3_HUMAN<br>TSC22 domain family protein 1 OS=Homo sapiens<br>GN=TSC22D1<br>PE=1 SV=3 - [T22D1_HUMAN ]<br>Adaptin ear-binding coat-associated protein 1<br>OS=Homo sapiens<br>GN=NECAP1<br>PE=1 SV=2 - [NECP1_HUMAN ]<br>Very-long-chain (3R)-3-hydroxyacyl-CoA dehydratase 2<br>OS=Homo sapiens<br>GN=PTPLB<br>PE=1 SV=1 - [HACD2_HUMAN ]<br>Rho GTPase-activating protein 21<br>OS=Homo sapiens<br>GN=ARHGAP21<br>PE=1 SV=1 - [RHG21_HUMAN ]<br>Ubiquitin-40S ribosomal protein S27a<br>OS=Homo sapiens<br>GN=RPS27A<br>PE=1 SV=2 - [RS27A_HUMAN ]<br>Platelet-activating factor acetylhydrolase<br>OS=Homo sapiens<br>GN=PLA2G7<br>PE=1 SV=1 - [PAFA_HUMAN]<br>Glutathione S-transferase A5<br>OS=Homo sapiens<br>GN=GSTA5<br>PE=1 SV=1 - [GSTAS_HUMAN ] | 15.67 | 1 | 36 | 36 | 73  | 1.086 | 0.748 | 1.042 | 1.156 | 157.26  | 15.67 | 52 | 73  | 2202 | 251.3 | 7.09 |
| Q15714 | Adaptin ear-binding coat-associated protein 1<br>OS=Homo sapiens<br>GN=NECAP1<br>PE=1 SV=2 - [NECP1_HUMAN ]<br>Very-long-chain (3R)-3-hydroxyacyl-CoA dehydratase 2<br>OS=Homo sapiens<br>GN=PTPLB<br>PE=1 SV=1 - [HACD2_HUMAN ]<br>Rho GTPase-activating protein 21<br>OS=Homo sapiens<br>GN=ARHGAP21<br>PE=1 SV=1 - [RHG21_HUMAN ]<br>Ubiquitin-40S ribosomal protein S27a<br>OS=Homo sapiens<br>GN=RPS27A<br>PE=1 SV=2 - [RS27A_HUMAN ]<br>Platelet-activating factor acetylhydrolase<br>OS=Homo sapiens<br>GN=PLA2G7<br>PE=1 SV=1 - [PAFA_HUMAN]<br>Glutathione S-transferase A5<br>OS=Homo sapiens<br>GN=GSTA5<br>PE=1 SV=1 - [GSTAS_HUMAN ]                                                                                                                                                                                                               | 3.82  | 1 | 2  | 5  | 27  | 0.714 | 1.121 | 1.314 | 1.156 | 56.78   | 3.82  | 7  | 27  | 1073 | 109.6 | 5.64 |
| Q8NC96 | Adaptin ear-binding coat-associated protein 1<br>OS=Homo sapiens<br>GN=NECAP1<br>PE=1 SV=2 - [NECP1_HUMAN ]<br>Very-long-chain (3R)-3-hydroxyacyl-CoA dehydratase 2<br>OS=Homo sapiens<br>GN=PTPLB<br>PE=1 SV=1 - [HACD2_HUMAN ]<br>Rho GTPase-activating protein 21<br>OS=Homo sapiens<br>GN=ARHGAP21<br>PE=1 SV=1 - [RHG21_HUMAN ]<br>Ubiquitin-40S ribosomal protein S27a<br>OS=Homo sapiens<br>GN=RPS27A<br>PE=1 SV=2 - [RS27A_HUMAN ]<br>Platelet-activating factor acetylhydrolase<br>OS=Homo sapiens<br>GN=PLA2G7<br>PE=1 SV=1 - [PAFA_HUMAN]<br>Glutathione S-transferase A5<br>OS=Homo sapiens<br>GN=GSTA5<br>PE=1 SV=1 - [GSTAS_HUMAN ]                                                                                                                                                                                                               | 25.09 | 1 | 5  | 6  | 12  | 0.973 | 0.725 | 0.866 | 1.156 | 30.58   | 25.09 | 7  | 12  | 275  | 29.7  | 6.80 |
| Q6Y1H2 | Adaptin ear-binding coat-associated protein 1<br>OS=Homo sapiens<br>GN=NECAP1<br>PE=1 SV=2 - [NECP1_HUMAN ]<br>Very-long-chain (3R)-3-hydroxyacyl-CoA dehydratase 2<br>OS=Homo sapiens<br>GN=PTPLB<br>PE=1 SV=1 - [HACD2_HUMAN ]<br>Rho GTPase-activating protein 21<br>OS=Homo sapiens<br>GN=ARHGAP21<br>PE=1 SV=1 - [RHG21_HUMAN ]<br>Ubiquitin-40S ribosomal protein S27a<br>OS=Homo sapiens<br>GN=RPS27A<br>PE=1 SV=2 - [RS27A_HUMAN ]<br>Platelet-activating factor acetylhydrolase<br>OS=Homo sapiens<br>GN=PLA2G7<br>PE=1 SV=1 - [PAFA_HUMAN]<br>Glutathione S-transferase A5<br>OS=Homo sapiens<br>GN=GSTA5<br>PE=1 SV=1 - [GSTAS_HUMAN ]                                                                                                                                                                                                               | 4.33  | 1 | 3  | 3  | 5   | 1.005 | 1.002 | 0.763 | 1.156 | 14.41   | 4.33  | 3  | 5   | 254  | 28.4  | 9.55 |
| Q5T5U3 | Adaptin ear-binding coat-associated protein 1<br>OS=Homo sapiens<br>GN=NECAP1<br>PE=1 SV=2 - [NECP1_HUMAN ]<br>Very-long-chain (3R)-3-hydroxyacyl-CoA dehydratase 2<br>OS=Homo sapiens<br>GN=PTPLB<br>PE=1 SV=1 - [HACD2_HUMAN ]<br>Rho GTPase-activating protein 21<br>OS=Homo sapiens<br>GN=ARHGAP21<br>PE=1 SV=1 - [RHG21_HUMAN ]<br>Ubiquitin-40S ribosomal protein S27a<br>OS=Homo sapiens<br>GN=RPS27A<br>PE=1 SV=2 - [RS27A_HUMAN ]<br>Platelet-activating factor acetylhydrolase<br>OS=Homo sapiens<br>GN=PLA2G7<br>PE=1 SV=1 - [PAFA_HUMAN]<br>Glutathione S-transferase A5<br>OS=Homo sapiens<br>GN=GSTA5<br>PE=1 SV=1 - [GSTAS_HUMAN ]                                                                                                                                                                                                               | 3.12  | 1 | 4  | 6  | 10  | 1.095 | 1.105 | 1.108 | 1.156 | 17.89   | 3.12  | 7  | 10  | 1957 | 217.2 | 7.80 |
| P62979 | Adaptin ear-binding coat-associated protein 1<br>OS=Homo sapiens<br>GN=NECAP1<br>PE=1 SV=2 - [NECP1_HUMAN ]<br>Very-long-chain (3R)-3-hydroxyacyl-CoA dehydratase 2<br>OS=Homo sapiens<br>GN=PTPLB<br>PE=1 SV=1 - [HACD2_HUMAN ]<br>Rho GTPase-activating protein 21<br>OS=Homo sapiens<br>GN=ARHGAP21<br>PE=1 SV=1 - [RHG21_HUMAN ]<br>Ubiquitin-40S ribosomal protein S27a<br>OS=Homo sapiens<br>GN=RPS27A<br>PE=1 SV=2 - [RS27A_HUMAN ]<br>Platelet-activating factor acetylhydrolase<br>OS=Homo sapiens<br>GN=PLA2G7<br>PE=1 SV=1 - [PAFA_HUMAN]<br>Glutathione S-transferase A5<br>OS=Homo sapiens<br>GN=GSTA5<br>PE=1 SV=1 - [GSTAS_HUMAN ]                                                                                                                                                                                                               | 70.51 | 3 | 4  | 17 | 459 | 2.701 | 2.096 | 1.026 | 1.156 | 1095.71 | 70.51 | 27 | 459 | 156  | 18.0  | 9.64 |
| Q13093 | Adaptin ear-binding coat-associated protein 1<br>OS=Homo sapiens<br>GN=NECAP1<br>PE=1 SV=2 - [NECP1_HUMAN ]<br>Very-long-chain (3R)-3-hydroxyacyl-CoA dehydratase 2<br>OS=Homo sapiens<br>GN=PTPLB<br>PE=1 SV=1 - [HACD2_HUMAN ]<br>Rho GTPase-activating protein 21<br>OS=Homo sapiens<br>GN=ARHGAP21<br>PE=1 SV=1 - [RHG21_HUMAN ]<br>Ubiquitin-40S ribosomal protein S27a<br>OS=Homo sapiens<br>GN=RPS27A<br>PE=1 SV=2 - [RS27A_HUMAN ]<br>Platelet-activating factor acetylhydrolase<br>OS=Homo sapiens<br>GN=PLA2G7<br>PE=1 SV=1 - [PAFA_HUMAN]<br>Glutathione S-transferase A5<br>OS=Homo sapiens<br>GN=GSTA5<br>PE=1 SV=1 - [GSTAS_HUMAN ]                                                                                                                                                                                                               | 4.54  | 1 | 1  | 2  | 2   | 1.022 | 0.822 | 1.204 | 1.156 | 4.31    | 4.54  | 2  | 2   | 441  | 50.0  | 7.56 |
| Q7RTV2 | Adaptin ear-binding coat-associated protein 1<br>OS=Homo sapiens<br>GN=NECAP1<br>PE=1 SV=2 - [NECP1_HUMAN ]<br>Very-long-chain (3R)-3-hydroxyacyl-CoA dehydratase 2<br>OS=Homo sapiens<br>GN=PTPLB<br>PE=1 SV=1 - [HACD2_HUMAN ]<br>Rho GTPase-activating protein 21<br>OS=Homo sapiens<br>GN=ARHGAP21<br>PE=1 SV=1 - [RHG21_HUMAN ]<br>Ubiquitin-40S ribosomal protein S27a<br>OS=Homo sapiens<br>GN=RPS27A<br>PE=1 SV=2 - [RS27A_HUMAN ]<br>Platelet-activating factor acetylhydrolase<br>OS=Homo sapiens<br>GN=PLA2G7<br>PE=1 SV=1 - [PAFA_HUMAN]<br>Glutathione S-transferase A5<br>OS=Homo sapiens<br>GN=GSTA5<br>PE=1 SV=1 - [GSTAS_HUMAN ]                                                                                                                                                                                                               | 8.11  | 1 | 2  | 2  | 2   | 1.123 | 1.858 | 1.470 | 1.156 | 4.36    | 8.11  | 2  | 2   | 222  | 25.7  | 8.03 |

|        |                                                                                                                                                                            |       |   |    |    |    |       |       |       |       |       |       |    |      |       |       |      |
|--------|----------------------------------------------------------------------------------------------------------------------------------------------------------------------------|-------|---|----|----|----|-------|-------|-------|-------|-------|-------|----|------|-------|-------|------|
| Q8IUH3 | RNA-binding protein 45<br>OS=Homo sapiens<br>GN=RBM45<br>PE=2 SV=1 - [RBM45_HUMAN]<br>Putative helicase MOV-10<br>OS=Homo sapiens<br>GN=MOV10<br>PE=1 SV=2 - [MOV10_HUMAN] | 2.31  | 1 | 1  | 1  | 5  | 1.726 | 2.016 | 0.917 | 1.157 | 4.21  | 2.31  | 1  | 5    | 476   | 53.5  | 7.17 |
| Q9HCE1 | Putative transferase CAF17, mitochondrial<br>OS=Homo sapiens<br>GN=IBA57<br>PE=1 SV=1 - [CAF17_HUMAN]                                                                      | 17.35 | 1 | 15 | 15 | 41 | 1.009 | 1.359 | 1.012 | 1.157 | 97.38 | 17.35 | 23 | 41   | 1003  | 113.6 | 8.82 |
| Q5T440 | Soluble scavenger receptor cysteine-rich domain-containing protein SSC5D<br>OS=Homo sapiens<br>GN=SSC5D<br>PE=2 SV=3 - [SRGRL_HUMAN]                                       | 10.11 | 1 | 3  | 3  | 12 | 1.193 | 0.935 | 1.089 | 1.157 | 23.08 | 10.11 | 6  | 12   | 356   | 38.1  | 9.83 |
| A1L4H1 | Alpha-globin transcription factor CP2<br>OS=Homo sapiens<br>GN=TFCP2<br>PE=1 SV=2 - [TFCP2_HUMAN]                                                                          | 1.53  | 1 | 1  | 1  | 1  | 0.939 | 1.545 | 0.769 | 1.157 | 0.00  | 1.53  | 1  | 1    | 1573  | 165.6 | 6.13 |
| Q12800 | Telomere-associated protein RIF1<br>OS=Homo sapiens<br>GN=RIF1<br>PE=1 SV=2 - [RIF1_HUMAN]                                                                                 | 12.55 | 1 | 3  | 4  | 8  | 0.809 | 1.185 | 1.129 | 1.157 | 20.78 | 12.55 | 6  | 8    | 502   | 57.2  | 5.80 |
| Q5UIP0 | A-kinase anchor protein 1, mitochondrial<br>OS=Homo sapiens<br>GN=AKAP1<br>PE=1 SV=1 - [AKAP1_HUMAN]                                                                       | 2.67  | 1 | 5  | 5  | 5  | 1.121 | 1.354 | 1.157 | 7.67  | 2.67  | 5     | 5  | 2472 | 274.3 | 5.52  |      |
| Q92667 | tRNA pseudouridine synthase A, mitochondrial<br>OS=Homo sapiens<br>GN=PLUS1<br>PE=1 SV=3 - [TRUA_HUMAN]                                                                    | 3.54  | 1 | 2  | 2  | 5  | 0.202 | 2.166 | 4.760 | 1.158 | 2.54  | 3.54  | 2  | 5    | 903   | 97.3  | 4.94 |
| Q9Y606 |                                                                                                                                                                            | 18.27 | 1 | 6  | 6  | 17 | 0.763 | 0.872 | 0.787 | 1.158 | 39.27 | 18.27 | 10 | 17   | 427   | 47.4  | 8.41 |

|        |                                                                                                             |       |   |    |    |    |       |       |       |       |       |       |    |    |     |       |       |
|--------|-------------------------------------------------------------------------------------------------------------|-------|---|----|----|----|-------|-------|-------|-------|-------|-------|----|----|-----|-------|-------|
| P62745 | Rho-related GTP-binding protein RhoB<br>OS=Homo sapiens<br>GN=RHOB<br>PE=1 SV=1 - [RHOB_HUMAN]              | 38.27 | 1 | 3  | 4  | 16 | 1.038 | 1.231 | 1.242 | 1.158 | 53.73 | 38.27 | 6  | 16 | 196 | 22.1  | 5.24  |
| Q6NT04 | Tigger transposable element-derived protein<br>7 OS=Homo sapiens<br>GN=TIGD7<br>PE=2 SV=1 - [TIGD7_HUMAN]   | 3.28  | 1 | 2  | 2  | 3  | 0.980 | 1.317 | 0.492 | 1.158 | 3.88  | 3.28  | 2  | 3  | 549 | 63.2  | 8.75  |
| Q9Y2G2 | Caspase recruitment domain-containing protein 8<br>OS=Homo sapiens<br>GN=CARD8<br>PE=1 SV=1 - [CARD8_HUMAN] | 3.25  | 1 | 1  | 1  | 1  | 0.823 | 0.472 | 0.544 | 1.158 | 3.34  | 3.25  | 1  | 1  | 431 | 48.9  | 5.22  |
| P46976 | Glycogenin-1<br>OS=Homo sapiens<br>GN=GYG1<br>PE=1 SV=4 - [GLYG_HUMAN]                                      | 17.71 | 1 | 7  | 7  | 32 | 1.085 | 1.022 | 0.970 | 1.158 | 87.24 | 17.71 | 10 | 32 | 350 | 39.4  | 5.53  |
| Q92665 | 28S ribosomal protein S31, mitochondrial<br>OS=Homo sapiens<br>GN=MRPS31<br>PE=1 SV=3 - [RT31_HUMAN]        | 19.24 | 1 | 7  | 7  | 20 | 0.929 | 1.155 | 1.087 | 1.158 | 48.85 | 19.24 | 9  | 20 | 395 | 45.3  | 9.29  |
| A6NKF9 | Putative Golgi pH regulator C<br>OS=Homo sapiens<br>GN=GPR89C<br>PE=5 SV=2 - [GPHRC_HUMAN]                  | 3.75  | 2 | 1  | 1  | 6  | 0.784 | 0.726 | 1.026 | 1.159 | 10.65 | 3.75  | 2  | 6  | 320 | 36.6  | 9.32  |
| Q15014 | Mortality factor 4-like protein 2<br>OS=Homo sapiens<br>GN=MORF4L2<br>PE=1 SV=1 - [MO4L2_HUMAN]             | 7.29  | 1 | 2  | 2  | 5  | 0.804 | 1.108 | 1.119 | 1.159 | 10.53 | 7.29  | 3  | 5  | 288 | 32.3  | 9.72  |
| Q9Y6F1 | Poly [ADP-ribose] polymerase 3<br>OS=Homo sapiens<br>GN=PARP3<br>PE=1 SV=3 - [PARP3_HUMAN]                  | 2.06  | 1 | 1  | 1  | 1  | 1.126 | 0.657 | 0.985 | 1.159 | 0.00  | 2.06  | 1  | 1  | 533 | 60.0  | 6.74  |
| Q96T37 | Putative RNA-binding protein 15<br>OS=Homo sapiens<br>GN=RBM15<br>PE=1 SV=2 - [RBM15_HUMAN]                 | 13.00 | 1 | 10 | 10 | 17 | 1.193 | 0.999 | 1.199 | 1.159 | 45.21 | 13.00 | 13 | 17 | 977 | 107.1 | 10.08 |

|        |                                                                                                                |       |   |    |    |     |       |       |       |       |        |       |    |     |      |       |      |
|--------|----------------------------------------------------------------------------------------------------------------|-------|---|----|----|-----|-------|-------|-------|-------|--------|-------|----|-----|------|-------|------|
| O14519 | Cyclin-dependent kinase 2-associated protein 1<br>OS=Homo sapiens<br>GN=CDK2AP1<br>PE=1 SV=1 - [CDKA1_HUMAN]   | 20.00 | 2 | 2  | 2  | 3   | 1.461 | 0.959 | 0.741 | 1.159 | 5.77   | 20.00 | 2  | 3   | 115  | 12.4  | 9.38 |
| Q10471 | Polypeptide N-acetylgalactosaminyltransferase 2 OS=Homo sapiens<br>GN=GALT2<br>PE=1 SV=1 - [GALT2_HUMAN]       | 26.97 | 1 | 17 | 19 | 63  | 0.854 | 0.860 | 0.923 | 1.159 | 143.36 | 26.97 | 30 | 63  | 571  | 64.7  | 8.35 |
| Q9H845 | Acyl-CoA dehydrogenase family member 9, mitochondrial OS=Homo sapiens<br>GN=ACAD9<br>PE=1 SV=1 - [ACAD9_HUMAN] | 26.89 | 1 | 16 | 16 | 51  | 1.142 | 1.019 | 0.902 | 1.159 | 121.53 | 26.89 | 25 | 51  | 621  | 68.7  | 7.96 |
| P46379 | Large proline-rich protein BAG6 OS=Homo sapiens<br>GN=BAG6<br>PE=1 SV=2 - [BAG6_HUMAN]                         | 20.58 | 1 | 16 | 16 | 59  | 0.992 | 1.099 | 1.124 | 1.159 | 163.62 | 20.58 | 25 | 59  | 1132 | 119.3 | 5.60 |
| Q12906 | Interleukin enhancer-binding factor 3 OS=Homo sapiens<br>GN=ILF3 PE=1 SV=3 - [ILF3_HUMAN]                      | 35.57 | 1 | 26 | 31 | 296 | 1.118 | 1.112 | 0.974 | 1.159 | 705.95 | 35.57 | 55 | 296 | 894  | 95.3  | 8.76 |
| Q96CW5 | Gamma-tubulin complex component 3 OS=Homo sapiens<br>GN=TUBGCP3<br>PE=1 SV=2 - [GCP3_HUMAN]                    | 9.37  | 1 | 7  | 7  | 20  | 1.158 | 1.169 | 0.883 | 1.159 | 44.69  | 9.37  | 12 | 20  | 907  | 103.5 | 8.12 |
| Q99576 | TSC22 domain family protein 3 OS=Homo sapiens<br>GN=TSC22D3<br>PE=1 SV=2 - [T22D3_HUMAN]                       | 19.40 | 1 | 2  | 3  | 11  | 1.056 | 1.182 | 1.102 | 1.160 | 23.26  | 19.40 | 5  | 11  | 134  | 14.8  | 4.54 |
| O95479 | GDH/G6PGL endoplasmic bifunctional protein OS=Homo sapiens<br>GN=H6PD<br>PE=1 SV=2 - [G6PE_HUMAN]              | 22.38 | 1 | 17 | 17 | 64  | 0.847 | 1.007 | 0.853 | 1.160 | 154.63 | 22.38 | 29 | 64  | 791  | 88.8  | 7.30 |



|        |                                                                                                                                                     |       |   |    |    |     |       |       |       |       |        |       |    |     |      |       |      |
|--------|-----------------------------------------------------------------------------------------------------------------------------------------------------|-------|---|----|----|-----|-------|-------|-------|-------|--------|-------|----|-----|------|-------|------|
| P52272 | Heterogeneous nuclear ribonucleoprotein M<br>OS=Homo sapiens<br>GN=HNRNPM<br>PE=1 SV=3 - [HNRNPM_HUMAN]                                             | 45.34 | 1 | 35 | 35 | 254 | 1.198 | 1.169 | 1.007 | 1.160 | 647.46 | 45.34 | 55 | 254 | 730  | 77.5  | 8.70 |
| Q9P225 | Dynein heavy chain 2, axonemal<br>OS=Homo sapiens<br>GN=DNAH2<br>PE=2 SV=3 - [DYH2_HUMAN]                                                           | 0.79  | 1 | 1  | 3  | 5   | 2.519 | 4.218 | 2.566 | 1.160 | 4.12   | 0.79  | 3  | 5   | 4427 | 507.4 | 6.37 |
| Q8NFS9 | N-acetyllactosaminide beta-1,6-N-acetylglucosaminyltransferase, isoform C<br>OS=Homo sapiens<br>GN=GCNT2<br>PE=2 SV=2 -                             | 4.48  | 1 | 1  | 1  | 1   | 0.967 | 0.777 | 1.580 | 1.161 | 3.16   | 4.48  | 1  | 1   | 402  | 46.5  | 8.16 |
| Q9BTL3 | RNMT-activating mini protein<br>OS=Homo sapiens<br>GN=FAM103A1<br>PE=1 SV=1 - [RAM_HUMAN]                                                           | 25.42 | 1 | 3  | 3  | 11  | 0.925 | 1.300 | 1.308 | 1.161 | 37.14  | 25.42 | 5  | 11  | 118  | 14.4  | 8.94 |
| Q8IUC6 | TIR domain-containing adapter molecule 1<br>OS=Homo sapiens<br>GN=TICAM1<br>PE=1 SV=1 - [TCAM1_HUMAN]<br>UV excision repair protein RAD23 homolog A | 1.26  | 1 | 1  | 1  | 6   | 0.674 | 1.525 | 1.819 | 1.161 | 11.56  | 1.26  | 2  | 6   | 712  | 76.4  | 5.41 |
| P54725 | Zinc finger protein 219<br>OS=Homo sapiens<br>GN=ZNF219<br>PE=1 SV=2 - [ZN219_HUMAN]                                                                | 23.42 | 1 | 6  | 9  | 47  | 1.249 | 1.110 | 1.357 | 1.161 | 113.93 | 23.42 | 16 | 47  | 363  | 39.6  | 4.58 |
| Q9P2Y4 | Intraflagellar transport protein 74 homolog<br>OS=Homo sapiens<br>GN=IFT74<br>PE=1 SV=1 - [IFT74_HUMAN]                                             | 1.39  | 1 | 1  | 1  | 1   | 1.313 | 1.153 | 1.137 | 1.161 | 0.00   | 1.39  | 1  | 1   | 722  | 76.8  | 9.39 |
| Q96LB3 | Intraflagellar transport protein 74 homolog<br>OS=Homo sapiens<br>GN=IFT74<br>PE=1 SV=1 - [IFT74_HUMAN]                                             | 10.50 | 1 | 6  | 6  | 9   | 0.828 | 1.347 | 1.134 | 1.161 | 22.87  | 10.50 | 7  | 9   | 600  | 69.2  | 6.00 |

|        |                                                                                                         |       |   |    |    |     |       |       |       |       |        |       |    |     |      |       |      |
|--------|---------------------------------------------------------------------------------------------------------|-------|---|----|----|-----|-------|-------|-------|-------|--------|-------|----|-----|------|-------|------|
| Q969X6 | Cirhin<br>OS=Homo sapiens<br>GN=CIRH1A<br>PE=1 SV=1 - [CIR1A_HUMAN]                                     | 3.06  | 1 | 2  | 2  | 3   | 0.747 | 1.194 | 0.766 | 1.161 | 9.55   | 3.06  | 2  | 3   | 686  | 76.8  | 8.85 |
| P43155 | Carnitine O-acetyltransferase<br>OS=Homo sapiens<br>GN=CRAT<br>PE=1 SV=5 - [CACP_HUMAN]                 | 27.00 | 1 | 17 | 17 | 46  | 0.958 | 1.238 | 1.020 | 1.161 | 105.28 | 27.00 | 25 | 46  | 626  | 70.8  | 8.44 |
| O95171 | Sciellin<br>OS=Homo sapiens<br>GN=SCEL PE=1 SV=2 - [SCEL_HUMAN]                                         | 1.31  | 1 | 1  | 1  | 1   | 1.206 | 0.814 | 0.832 | 1.161 | 1.88   | 1.31  | 1  | 1   | 688  | 77.5  | 9.38 |
| P51991 | Heterogeneous nuclear ribonucleoprotein A3<br>OS=Homo sapiens<br>GN=HNRNPA3<br>PE=1 SV=2 - [ROA3_HUMAN] | 45.77 | 1 | 20 | 22 | 177 | 1.075 | 1.057 | 0.894 | 1.161 | 454.75 | 45.77 | 33 | 177 | 378  | 39.6  | 9.01 |
| P00367 | Glutamate dehydrogenase 1, mitochondrial<br>OS=Homo sapiens<br>GN=GLUD1<br>PE=1 SV=2 - [DHE3_HUMAN]     | 45.88 | 2 | 26 | 27 | 296 | 1.241 | 1.212 | 1.053 | 1.162 | 738.85 | 45.88 | 47 | 296 | 558  | 61.4  | 7.80 |
| Q12873 | Chromodomain-helicase-DNA-binding protein 3<br>OS=Homo sapiens<br>GN=CHD3<br>PE=1 SV=3 - [CHD3_HUMAN]   | 4.80  | 1 | 3  | 8  | 25  | 0.886 | 1.755 | 0.871 | 1.162 | 53.25  | 4.80  | 15 | 25  | 2000 | 226.4 | 7.30 |
| O14530 | Thioredoxin domain-containing protein 9<br>OS=Homo sapiens<br>GN=TXNDC9<br>PE=1 SV=2 - [TXND9_HUMAN]    | 13.27 | 1 | 2  | 4  | 9   | 0.966 | 0.894 | 1.092 | 1.162 | 15.69  | 13.27 | 5  | 9   | 226  | 26.5  | 5.88 |
| Q9NXG2 | THUMP domain-containing protein 1<br>OS=Homo sapiens<br>GN=THUMPD1<br>PE=1 SV=2 - [THUM1_HUMAN]         | 15.01 | 1 | 6  | 6  | 17  | 1.111 | 1.305 | 0.915 | 1.162 | 30.66  | 15.01 | 9  | 17  | 353  | 39.3  | 7.88 |
| P51810 | G-protein coupled receptor 143<br>OS=Homo sapiens<br>GN=GPR143<br>PE=1 SV=2 - [GP143_HUMAN]             | 3.22  | 1 | 1  | 1  | 2   | 0.754 | 0.895 | 0.867 | 1.162 | 4.72   | 3.22  | 1  | 2   | 404  | 43.8  | 7.58 |

|        |                                                                                                               |       |   |    |    |    |       |       |       |       |       |       |    |    |      |       |      |
|--------|---------------------------------------------------------------------------------------------------------------|-------|---|----|----|----|-------|-------|-------|-------|-------|-------|----|----|------|-------|------|
| Q96RP9 | Elongation factor G, mitochondrial<br>OS=Homo sapiens<br>GN=GFM1<br>PE=1 SV=2 - [EFGM_HUMAN]                  | 17.04 | 1 | 13 | 13 | 28 | 0.879 | 0.812 | 0.927 | 1.163 | 68.36 | 17.04 | 18 | 28 | 751  | 83.4  | 7.01 |
| Q03169 | Tumor necrosis factor alpha-induced protein 2<br>OS=Homo sapiens<br>GN=TNFAIP2<br>PE=1 SV=2 - [TNAP2_HUMAN]   | 17.74 | 1 | 9  | 9  | 19 | 1.064 | 0.800 | 0.705 | 1.163 | 51.23 | 17.74 | 12 | 19 | 654  | 72.6  | 6.46 |
| Q6V017 | Protocadherin Fat 4<br>OS=Homo sapiens<br>GN=FAT4<br>PE=1 SV=2 - [FAT4_HUMAN]                                 | 0.68  | 1 | 2  | 2  | 5  | 2.727 | 0.949 | 0.941 | 1.163 | 7.11  | 0.68  | 3  | 5  | 4981 | 542.4 | 4.94 |
| P30711 | Glutathione S-transferase theta-1<br>OS=Homo sapiens<br>GN=GSTT1<br>PE=1 SV=4 - [GSTT1_HUMAN]                 | 42.50 | 1 | 9  | 11 | 30 | 1.349 | 1.127 | 1.046 | 1.163 | 61.55 | 42.50 | 16 | 30 | 240  | 27.3  | 7.49 |
| O00635 | E3 ubiquitin-protein ligase TRIM38<br>OS=Homo sapiens<br>GN=TRIM38<br>PE=1 SV=1 - [TRI38_HUMAN]               | 6.67  | 1 | 3  | 3  | 8  | 1.407 | 1.408 | 1.218 | 1.163 | 17.09 | 6.67  | 4  | 8  | 465  | 53.4  | 7.02 |
| P82933 | 28S ribosomal protein S9, mitochondrial<br>OS=Homo sapiens<br>GN=MRPS9<br>PE=1 SV=2 - [RT09_HUMAN]            | 22.73 | 1 | 7  | 7  | 22 | 0.797 | 1.214 | 0.957 | 1.163 | 89.37 | 22.73 | 9  | 22 | 396  | 45.8  | 9.51 |
| O14786 | Neuropilin-1<br>OS=Homo sapiens<br>GN=NRP1<br>PE=1 SV=3 - [NRP1_HUMAN]                                        | 3.14  | 1 | 2  | 2  | 3  | 0.696 | 1.480 | 2.069 | 1.164 | 2.20  | 3.14  | 2  | 3  | 923  | 103.1 | 5.88 |
| Q9H7V2 | Synapse differentiation-inducing gene protein 1<br>OS=Homo sapiens<br>GN=SYNDIG1<br>PE=2 SV=1 - [SYNG1_HUMAN] | 8.91  | 1 | 1  | 2  | 4  | 1.198 | 0.604 | 0.733 | 1.164 | 1.61  | 8.91  | 2  | 4  | 258  | 28.5  | 4.88 |
| O94927 | HAUS augmin-like complex subunit 5<br>OS=Homo sapiens<br>GN=HAUS5<br>PE=1 SV=2 - [HAUSS_HUMAN]                | 1.74  | 1 | 1  | 1  | 1  | 0.720 | 1.043 | 0.880 | 1.164 | 2.80  | 1.74  | 1  | 1  | 633  | 71.6  | 8.51 |

|        |                                                                                                                      |       |   |    |    |     |       |       |       |       |        |       |    |     |      |       |       |
|--------|----------------------------------------------------------------------------------------------------------------------|-------|---|----|----|-----|-------|-------|-------|-------|--------|-------|----|-----|------|-------|-------|
| P07954 | Fumarate<br>hydratase,<br>mitochondrial<br>OS=Homo<br>sapiens GN=FH<br>PE=1 SV=3 -<br>[FUMH_HUMAN]                   | 50.20 | 3 | 24 | 25 | 125 | 0.945 | 1.334 | 1.059 | 1.164 | 337.69 | 50.20 | 37 | 125 | 510  | 54.6  | 8.76  |
| O15439 | Multidrug<br>resistance-<br>associated<br>protein 4<br>OS=Homo<br>sapiens<br>GN=ABCC4<br>PE=1 SV=3 -<br>[MRP4_HUMAN] | 19.77 | 1 | 26 | 26 | 77  | 2.639 | 0.438 | 0.824 | 1.164 | 201.44 | 19.77 | 37 | 77  | 1325 | 149.4 | 8.19  |
| Q9UBX3 | Mitochondrial<br>dicarboxylate<br>carrier<br>OS=Homo<br>sapiens<br>GN=SLC25A10<br>PE=1 SV=2 -<br>[DIC_HUMAN]         | 6.62  | 1 | 2  | 2  | 5   | 1.029 | 1.094 | 1.230 | 1.164 | 13.21  | 6.62  | 3  | 5   | 287  | 31.3  | 9.54  |
| Q9Y2I8 | WD repeat-<br>containing<br>protein 37<br>OS=Homo<br>sapiens<br>GN=WDR37<br>PE=1 SV=2 -<br>[WDR37_HUMAN]             | 4.45  | 1 | 2  | 2  | 3   | 1.160 | 1.008 | 1.055 | 1.164 | 3.57   | 4.45  | 3  | 3   | 494  | 54.6  | 7.23  |
| Q9NW13 | RNA-binding<br>protein 28<br>OS=Homo<br>sapiens<br>GN=RBM28<br>PE=1 SV=3 -<br>[RBM28_HUMAN]                          | 8.56  | 1 | 6  | 7  | 13  | 0.999 | 0.951 | 0.915 | 1.165 | 29.64  | 8.56  | 9  | 13  | 759  | 85.7  | 9.22  |
| Q9BQC6 | Ribosomal<br>protein 63,<br>mitochondrial<br>OS=Homo<br>sapiens<br>GN=MRPL57<br>PE=1 SV=1 -<br>[RT63_HUMAN]          | 6.86  | 1 | 1  | 1  | 9   | 0.996 | 1.114 | 0.995 | 1.165 | 19.42  | 6.86  | 2  | 9   | 102  | 12.3  | 11.44 |
| Q14320 | Protein<br>FAM50A<br>OS=Homo<br>sapiens<br>GN=FAM50A<br>PE=1 SV=2 -<br>[FA50A_HUMAN]                                 | 25.37 | 2 | 6  | 8  | 26  | 1.203 | 1.182 | 1.448 | 1.165 | 51.43  | 25.37 | 13 | 26  | 339  | 40.2  | 6.83  |
| P38919 | Eukaryotic<br>initiation factor<br>4A-III<br>OS=Homo<br>sapiens<br>GN=EIF4A3<br>PE=1 SV=4 -<br>[IF4A3_HUMAN]         | 34.55 | 1 | 13 | 17 | 76  | 1.153 | 1.201 | 0.927 | 1.165 | 194.94 | 34.55 | 28 | 76  | 411  | 46.8  | 6.73  |
| Q6P3W7 | SCY1-like<br>protein 2<br>OS=Homo<br>sapiens<br>GN=SCYL2<br>PE=1 SV=1 -<br>[SCYL2_HUMAN]                             | 10.76 | 1 | 8  | 8  | 35  | 1.749 | 1.054 | 1.002 | 1.165 | 65.61  | 10.76 | 14 | 35  | 929  | 103.6 | 8.22  |

|        |                                                                                                                       |       |   |    |    |     |       |       |       |       |        |       |    |     |     |       |      |
|--------|-----------------------------------------------------------------------------------------------------------------------|-------|---|----|----|-----|-------|-------|-------|-------|--------|-------|----|-----|-----|-------|------|
| P19367 | Hexokinase-1<br>OS=Homo sapiens<br>GN=HK1 PE=1<br>SV=3 -<br>[HK1_HUMAN]                                               | 42.31 | 1 | 34 | 38 | 175 | 1.233 | 1.218 | 1.157 | 1.165 | 431.55 | 42.31 | 62 | 175 | 917 | 102.4 | 6.80 |
| Q96TA2 | ATP-dependent zinc metalloprotease YME1L1<br>OS=Homo sapiens<br>GN=YME1L1<br>PE=1 SV=2 -<br>[YME1L1_HUMAN]            | 14.88 | 1 | 10 | 10 | 20  | 0.884 | 0.867 | 0.836 | 1.165 | 35.33  | 14.88 | 15 | 20  | 773 | 86.4  | 8.76 |
| O95298 | NADH dehydrogenase [ubiquinone] 1 subunit C2<br>OS=Homo sapiens<br>GN=NDUFC2<br>PE=1 SV=1 -<br>[NDUC2_HUMAN]          | 30.25 | 2 | 4  | 4  | 19  | 0.770 | 0.982 | 0.753 | 1.165 | 45.45  | 30.25 | 6  | 19  | 119 | 14.2  | 8.98 |
| Q9BVC4 | Target of rapamycin complex subunit LST8<br>OS=Homo sapiens<br>GN=MLST8<br>PE=1 SV=1 -<br>[LST8_HUMAN]                | 9.20  | 1 | 3  | 3  | 7   | 0.908 | 0.971 | 1.271 | 1.165 | 16.81  | 9.20  | 5  | 7   | 326 | 35.9  | 5.86 |
| Q9Y2L1 | Exosome complex exonuclease RRP44<br>OS=Homo sapiens<br>GN=DIS3 PE=1<br>SV=2 -<br>[RRP44_HUMAN]                       | 10.65 | 1 | 10 | 10 | 22  | 1.084 | 1.267 | 1.039 | 1.166 | 46.01  | 10.65 | 16 | 22  | 958 | 108.9 | 7.14 |
| Q96DI7 | US small nuclear ribonucleoprotein 40 kDa<br>protein<br>OS=Homo sapiens<br>GN=SNRNP40<br>PE=1 SV=1 -<br>[SNR40_HUMAN] | 16.53 | 1 | 6  | 6  | 8   | 1.001 | 1.375 | 1.081 | 1.166 | 16.80  | 16.53 | 8  | 8   | 357 | 39.3  | 8.10 |
| Q96K19 | E3 ubiquitin-protein ligase RNF170<br>OS=Homo sapiens<br>GN=RNF170<br>PE=1 SV=2 -<br>[RNF170_HUMAN]                   | 12.79 | 1 | 3  | 3  | 16  | 1.109 | 0.852 | 0.590 | 1.166 | 38.10  | 12.79 | 5  | 16  | 258 | 29.8  | 5.58 |
| Q9H089 | Large subunit GTPase 1 homolog<br>OS=Homo sapiens<br>GN=LSG1 PE=1<br>SV=2 -<br>[LSG1_HUMAN]                           | 10.33 | 1 | 7  | 7  | 12  | 1.278 | 1.046 | 0.973 | 1.166 | 22.03  | 10.33 | 10 | 12  | 658 | 75.2  | 6.38 |

|        |                                                                                                                |       |   |    |    |     |       |       |       |       |        |       |    |     |      |       |      |
|--------|----------------------------------------------------------------------------------------------------------------|-------|---|----|----|-----|-------|-------|-------|-------|--------|-------|----|-----|------|-------|------|
| Q8WX93 | Palladin<br>OS=Homo sapiens<br>GN=PALLD<br>PE=1 SV=3 - [PALLD_HUMAN]                                           | 28.05 | 1 | 27 | 28 | 368 | 1.298 | 1.099 | 1.485 | 1.167 | 943.54 | 28.05 | 48 | 368 | 1383 | 150.5 | 7.09 |
| Q6DKK2 | Tetratricopeptide repeat protein 19, mitochondrial<br>OS=Homo sapiens<br>GN=TTC19<br>PE=1 SV=4 - [TTC19_HUMAN] | 7.63  | 1 | 3  | 3  | 10  | 1.221 | 0.853 | 0.502 | 1.167 | 23.68  | 7.63  | 5  | 10  | 380  | 42.4  | 5.77 |
| Q9Y2G4 | Ankyrin repeat domain-containing protein 6<br>OS=Homo sapiens<br>GN=ANKRD6<br>PE=1 SV=3 - [ANKR6_HUMAN]        | 1.79  | 1 | 1  | 1  | 1   | 0.809 | 1.040 | 1.148 | 1.167 | 0.00   | 1.79  | 1  | 1   | 727  | 79.9  | 9.32 |
| P61978 | Heterogeneous nuclear ribonucleoprotein K<br>OS=Homo sapiens<br>GN=HNRNPK<br>PE=1 SV=1 - [HNRNPK_HUMAN]        | 63.07 | 1 | 26 | 26 | 271 | 1.081 | 1.281 | 1.039 | 1.168 | 612.90 | 63.07 | 44 | 271 | 463  | 50.9  | 5.54 |
| Q13952 | Nuclear transcription factor Y subunit gamma<br>OS=Homo sapiens<br>GN=NFYC<br>PE=1 SV=3 - [NFYC_HUMAN]         | 4.59  | 1 | 2  | 2  | 4   | 1.001 | 1.409 | 0.853 | 1.168 | 8.94   | 4.59  | 4  | 4   | 458  | 50.3  | 6.10 |
| Q8WVCO | RNA polymerase-associated protein LEO1<br>OS=Homo sapiens<br>GN=LEO1<br>PE=1 SV=1 - [LEO1_HUMAN]               | 1.35  | 1 | 1  | 1  | 1   | 1.406 | 1.023 | 1.081 | 1.168 | 0.00   | 1.35  | 1  | 1   | 666  | 75.4  | 4.51 |
| Q96BX8 | MOB kinase activator 3A<br>OS=Homo sapiens<br>GN=MOB3A<br>PE=1 SV=1 - [MOB3A_HUMAN]                            | 7.83  | 1 | 2  | 2  | 3   | 0.611 | 1.340 | 1.379 | 1.168 | 2.11   | 7.83  | 3  | 3   | 217  | 25.4  | 8.63 |
| P48507 | Glutamate--cysteine ligase regulatory subunit<br>OS=Homo sapiens<br>GN=GCLM<br>PE=1 SV=1 - [GSH0_HUMAN]        | 32.12 | 1 | 8  | 8  | 58  | 1.093 | 0.412 | 0.935 | 1.168 | 115.39 | 32.12 | 15 | 58  | 274  | 30.7  | 6.02 |

|        |                                                                                                                             |       |   |    |    |     |        |       |       |        |        |       |    |     |      |       |      |
|--------|-----------------------------------------------------------------------------------------------------------------------------|-------|---|----|----|-----|--------|-------|-------|--------|--------|-------|----|-----|------|-------|------|
| P01889 | HLA class I histocompatibility antigen, B-7 alpha chain<br>OS=Homo sapiens<br>GN=HLA-B<br>PE=1 SV=3 - [1B07_HUMAN]          | 38.95 | 2 | 2  | 13 | 90  | 44.062 | 2.387 | 1.169 | 242.11 | 38.95  | 21    | 90 | 362 | 40.4 | 5.85  |      |
| O00257 | E3 SUMO-protein ligase CBX4<br>OS=Homo sapiens<br>GN=CBX4<br>PE=1 SV=3 - [CBX4_HUMAN]                                       | 1.61  | 1 | 1  | 1  | 2   | 1.479  | 1.661 | 1.019 | 1.169  | 2.60   | 1.61  | 2  | 2   | 560  | 61.3  | 9.36 |
| Q96A35 | 39S ribosomal protein L24, mitochondrial<br>OS=Homo sapiens<br>GN=MRPL24<br>PE=1 SV=1 - [RM24_HUMAN]                        | 33.33 | 1 | 6  | 6  | 16  | 0.977  | 1.228 | 0.874 | 1.169  | 38.40  | 33.33 | 9  | 16  | 216  | 24.9  | 9.29 |
| Q96RQ1 | Endoplasmic reticulum-Golgi intermediate compartment protein 2<br>OS=Homo sapiens<br>GN=ERGLC2<br>PE=1 SV=2 - [ERGL2_HUMAN] | 13.79 | 1 | 5  | 5  | 10  | 0.909  | 0.808 | 0.729 | 1.169  | 16.34  | 13.79 | 7  | 10  | 377  | 42.5  | 6.77 |
| Q8WVC6 | Dephospho-CoA kinase domain-containing protein<br>OS=Homo sapiens<br>GN=DCAKD<br>PE=1 SV=1 - [DCAKD_HUMAN]                  | 17.32 | 1 | 3  | 3  | 5   | 0.850  | 1.056 | 0.811 | 1.169  | 12.14  | 17.32 | 5  | 5   | 231  | 26.5  | 9.58 |
| Q92614 | Unconventional myosin-XVIIIa<br>OS=Homo sapiens<br>GN=MYO18A<br>PE=1 SV=3 - [MY18A_HUMAN]                                   | 17.04 | 4 | 30 | 34 | 101 | 1.475  | 1.288 | 1.116 | 1.170  | 221.40 | 17.04 | 50 | 101 | 2054 | 233.0 | 6.30 |
| O60508 | Pre-mRNA-processing factor 17<br>OS=Homo sapiens<br>GN=CDC40<br>PE=1 SV=1 - [PRP17_HUMAN]                                   | 1.73  | 1 | 1  | 1  | 1   | 1.206  | 1.456 | 1.159 | 1.170  | 2.85   | 1.73  | 1  | 1   | 579  | 65.5  | 7.06 |
| Q99972 | Myocilin<br>OS=Homo sapiens<br>GN=MYOC<br>PE=1 SV=2 - [MYOC_HUMAN]                                                          | 1.98  | 1 | 1  | 1  | 1   | 1.077  | 0.785 | 1.313 | 1.170  | 0.00   | 1.98  | 1  | 1   | 504  | 56.9  | 5.54 |

|        |                                                                                                                |       |   |    |    |    |       |       |       |       |        |       |    |    |      |       |      |
|--------|----------------------------------------------------------------------------------------------------------------|-------|---|----|----|----|-------|-------|-------|-------|--------|-------|----|----|------|-------|------|
| Q5TC84 | Opioid growth factor receptor-like protein 1<br>OS=Homo sapiens<br>GN=OGFRL1<br>PE=2 SV=1 - [OGRL1_HUMAN]      | 9.98  | 1 | 4  | 4  | 6  | 1.377 | 0.627 | 1.198 | 1.170 | 11.32  | 9.98  | 6  | 6  | 451  | 51.2  | 6.13 |
| Q13596 | Sorting nexin-1<br>OS=Homo sapiens<br>GN=SNX1<br>PE=1 SV=3 - [SNX1_HUMAN]                                      | 44.06 | 1 | 21 | 23 | 83 | 1.119 | 0.918 | 0.955 | 1.170 | 239.09 | 44.06 | 36 | 83 | 522  | 59.0  | 5.15 |
| Q8WW12 | PEST proteolytic signal-containing nuclear protein<br>OS=Homo sapiens<br>GN=PCNP<br>PE=1 SV=2 - [PCNP_HUMAN]   | 40.45 | 1 | 6  | 6  | 35 | 1.260 | 1.480 | 0.870 | 1.170 | 87.52  | 40.45 | 12 | 35 | 178  | 18.9  | 7.49 |
| P49770 | Translation initiation factor eIF-2B subunit beta<br>OS=Homo sapiens<br>GN=EIF2B2<br>PE=1 SV=3 - [EI2BB_HUMAN] | 31.62 | 1 | 10 | 10 | 22 | 1.070 | 0.939 | 1.006 | 1.170 | 50.49  | 31.62 | 15 | 22 | 351  | 39.0  | 6.16 |
| O00629 | Importin subunit alpha-3<br>OS=Homo sapiens<br>GN=KPNA4<br>PE=1 SV=1 - [IMA3_HUMAN]                            | 18.62 | 1 | 4  | 9  | 48 | 0.927 | 1.163 | 1.359 | 1.170 | 100.38 | 18.62 | 14 | 48 | 521  | 57.9  | 4.96 |
| Q7Z478 | ATP-dependent RNA helicase DHX29<br>OS=Homo sapiens<br>GN=DHX29<br>PE=1 SV=2 - [DHX29_HUMAN]                   | 14.32 | 1 | 18 | 18 | 47 | 0.937 | 0.998 | 1.060 | 1.170 | 126.33 | 14.32 | 23 | 47 | 1369 | 155.1 | 8.09 |
| P16278 | Beta-galactosidase<br>OS=Homo sapiens<br>GN=GLB1 PE=1 SV=2 - [BGAL_HUMAN]                                      | 26.00 | 1 | 12 | 13 | 67 | 0.909 | 0.943 | 0.976 | 1.170 | 172.37 | 26.00 | 21 | 67 | 677  | 76.0  | 6.57 |
| Q9Y676 | 28S ribosomal protein S18b, mitochondrial<br>OS=Homo sapiens<br>GN=MRPS18B<br>PE=1 SV=1 - [RT18B_HUMAN]        | 33.72 | 1 | 5  | 5  | 39 | 0.898 | 1.078 | 0.891 | 1.171 | 140.13 | 33.72 | 8  | 39 | 258  | 29.4  | 9.38 |
| P42166 | Lamina-associated polypeptide 2, isoform alpha<br>OS=Homo sapiens<br>GN=TMPO<br>PE=1 SV=2 - [LAP2A_HUMAN]      | 22.05 | 3 | 6  | 14 | 71 | 0.954 | 0.993 | 0.755 | 1.171 | 143.22 | 22.05 | 22 | 71 | 694  | 75.4  | 7.66 |



|        |                                                                                                               |       |   |    |    |     |       |       |       |       |         |       |    |     |      |       |       |
|--------|---------------------------------------------------------------------------------------------------------------|-------|---|----|----|-----|-------|-------|-------|-------|---------|-------|----|-----|------|-------|-------|
| Q9NYI0 | PH and SEC7 domain-containing protein 3<br>OS=Homo sapiens<br>GN=PSD3<br>PE=1 SV=2 - [PSD3_HUMAN]             | 8.30  | 1 | 8  | 8  | 15  | 2.141 | 0.698 | 1.276 | 1.171 | 34.66   | 8.30  | 10 | 15  | 1048 | 116.0 | 5.99  |
| P09651 | Heterogeneous nuclear ribonucleoprotein A1<br>OS=Homo sapiens<br>GN=HNRNPA1<br>PE=1 SV=5 - [ROA1_HUMAN]       | 50.00 | 2 | 19 | 23 | 499 | 1.040 | 1.197 | 0.892 | 1.171 | 1315.40 | 50.00 | 41 | 499 | 372  | 38.7  | 9.13  |
| Q9UHQ9 | NADH-cytochrome b5 reductase 1<br>OS=Homo sapiens<br>GN=CYB5R1<br>PE=1 SV=1 - [NBSR1_HUMAN]                   | 35.08 | 1 | 13 | 13 | 67  | 1.149 | 0.653 | 0.789 | 1.171 | 134.19  | 35.08 | 24 | 67  | 305  | 34.1  | 9.38  |
| P82930 | 28S ribosomal protein S34, mitochondrial<br>OS=Homo sapiens<br>GN=MRPS34<br>PE=1 SV=2 - [RT34_HUMAN]          | 25.69 | 1 | 4  | 5  | 17  | 0.811 | 1.404 | 1.100 | 1.171 | 53.48   | 25.69 | 7  | 17  | 218  | 25.6  | 9.98  |
| Q5H9F3 | BCL-6 corepressor-like protein 1<br>OS=Homo sapiens<br>GN=BCORL1<br>PE=1 SV=1 - [BCORL_HUMAN]                 | 1.17  | 1 | 2  | 2  | 2   | 1.165 | 1.111 | 1.206 | 1.171 | 4.41    | 1.17  | 2  | 2   | 1711 | 182.4 | 7.24  |
| Q9UKN7 | Unconventional myosin-XV<br>OS=Homo sapiens<br>GN=MYO15A<br>PE=1 SV=2 - [MYO15_HUMAN]                         | 0.68  | 1 | 1  | 2  | 23  | 1.081 | 0.984 | 1.438 | 1.171 | 23.26   | 0.68  | 3  | 23  | 3530 | 395.0 | 9.17  |
| Q8NDV7 | Trinucleotide repeat-containing gene 6A protein<br>OS=Homo sapiens<br>GN=TNRC6A<br>PE=1 SV=2 - [TNRC6A_HUMAN] | 2.04  | 2 | 3  | 3  | 8   | 0.875 | 0.987 | 1.155 | 1.171 | 6.85    | 2.04  | 5  | 8   | 1962 | 210.2 | 7.01  |
| Q9UBB6 | Neurochondrin<br>OS=Homo sapiens<br>GN=NCDN<br>PE=1 SV=1 - [NCDN_HUMAN]                                       | 3.70  | 1 | 3  | 3  | 7   | 0.886 | 0.921 | 1.052 | 1.171 | 19.08   | 3.70  | 5  | 7   | 729  | 78.8  | 5.48  |
| Q9NWB6 | Arginine and glutamate-rich protein 1<br>OS=Homo sapiens<br>GN=ARGLU1<br>PE=1 SV=1 - [ARGL1_HUMAN]            | 16.85 | 1 | 6  | 7  | 23  | 1.040 | 1.216 | 1.022 | 1.171 | 47.01   | 16.85 | 11 | 23  | 273  | 33.2  | 10.35 |

|        |                                                                                                   |       |    |    |    |     |       |       |       |       |        |       |    |     |      |       |      |
|--------|---------------------------------------------------------------------------------------------------|-------|----|----|----|-----|-------|-------|-------|-------|--------|-------|----|-----|------|-------|------|
| P05106 | Integrin beta-3 OS=Homo sapiens<br>GN=ITGB3<br>PE=1 SV=2 - [ITB3_HUMAN]                           | 17.39 | 1  | 13 | 14 | 65  | 1.682 | 0.614 | 0.689 | 1.172 | 173.14 | 17.39 | 24 | 65  | 788  | 87.0  | 5.24 |
| P49459 | Ubiquitin-conjugating enzyme E2 A OS=Homo sapiens<br>GN=UBE2A<br>PE=1 SV=2 - [UBE2A_HUMAN]        | 17.76 | 1  | 2  | 2  | 11  | 0.990 | 1.001 | 1.116 | 1.172 | 24.41  | 17.76 | 4  | 11  | 152  | 17.3  | 5.15 |
| Q9C0G6 | Dynein heavy chain 6, axonemal OS=Homo sapiens<br>GN=DNAH6<br>PE=1 SV=3 - [DYH6_HUMAN]            | 1.18  | 1  | 4  | 5  | 8   | 1.170 | 0.380 | 0.718 | 1.172 | 11.47  | 1.18  | 5  | 8   | 4158 | 475.7 | 6.00 |
| Q96GA3 | Protein LTV1 homolog OS=Homo sapiens<br>GN=LTV1 PE=1 SV=1 - [LTV1_HUMAN]                          | 2.11  | 1  | 1  | 1  | 2   | 0.731 | 1.434 | 0.718 | 1.172 | 2.53   | 2.11  | 2  | 2   | 475  | 54.8  | 4.91 |
| P51572 | B-cell receptor-associated protein 31 OS=Homo sapiens<br>GN=BCAP31<br>PE=1 SV=3 - [BAP31_HUMAN]   | 47.15 | 1  | 17 | 17 | 202 | 1.180 | 1.083 | 0.988 | 1.172 | 444.58 | 47.15 | 28 | 202 | 246  | 28.0  | 8.44 |
| Q4G0J3 | La-related protein 7 OS=Homo sapiens<br>GN=LARP7<br>PE=1 SV=1 - [LARP7_HUMAN]                     | 19.59 | 1  | 11 | 11 | 41  | 1.111 | 1.377 | 1.138 | 1.172 | 99.48  | 19.59 | 19 | 41  | 582  | 66.9  | 9.55 |
| Q8WZ82 | Ovarian cancer-associated gene 2 protein OS=Homo sapiens<br>GN=OVCA2<br>PE=1 SV=1 - [OVCA2_HUMAN] | 15.42 | 1  | 2  | 2  | 11  | 1.130 | 1.035 | 1.055 | 1.172 | 35.35  | 15.42 | 3  | 11  | 227  | 24.4  | 6.89 |
| Q9UK10 | Zinc finger protein 225 OS=Homo sapiens<br>GN=ZNF225<br>PE=2 SV=2 - [ZN225_HUMAN]                 | 3.26  | 11 | 1  | 2  | 3   | 1.049 | 2.252 | 5.682 | 1.173 | 2.55   | 3.26  | 3  | 3   | 706  | 82.4  | 8.91 |
| O00567 | Nudeolar protein 56 OS=Homo sapiens<br>GN=NOP56<br>PE=1 SV=4 - [NOP56_HUMAN]                      | 45.29 | 1  | 21 | 21 | 71  | 0.915 | 1.015 | 0.940 | 1.173 | 190.41 | 45.29 | 36 | 71  | 594  | 66.0  | 9.19 |

|        |                                                                                                                          |       |   |    |    |    |       |       |       |       |        |       |    |    |      |       |      |
|--------|--------------------------------------------------------------------------------------------------------------------------|-------|---|----|----|----|-------|-------|-------|-------|--------|-------|----|----|------|-------|------|
| Q99717 | Mothers<br>against<br>decapentaplegic<br>homolog 5<br>OS=Homo<br>sapiens<br>GN=SMAD5<br>PE=1 SV=1 -<br>[SMAD5_HUMA<br>N] | 7.10  | 2 | 3  | 3  | 7  | 1.337 | 1.676 | 1.124 | 1.173 | 9.65   | 7.10  | 4  | 7  | 465  | 52.2  | 7.71 |
| Q8WY36 | HMG box<br>transcription<br>factor BBX<br>OS=Homo<br>sapiens<br>GN=BBX PE=1<br>SV=1 -<br>[BBX_HUMAN]                     | 4.46  | 3 | 3  | 4  | 7  | 0.939 | 1.340 | 1.048 | 1.173 | 11.14  | 4.46  | 5  | 7  | 941  | 105.1 | 8.79 |
| Q96SB3 | Neurabin-2<br>OS=Homo<br>sapiens<br>GN=PPP1R9B<br>PE=1 SV=2 -<br>[NEB2_HUMAN]                                            | 18.65 | 1 | 13 | 14 | 50 | 0.988 | 1.016 | 0.970 | 1.173 | 114.32 | 18.65 | 24 | 50 | 815  | 89.1  | 4.97 |
| O75575 | DNA-directed<br>RNA<br>polymerase III<br>subunit RPC9<br>OS=Homo<br>sapiens<br>GN=CRCP<br>PE=1 SV=1 -<br>[RPC9_HUMAN]    | 4.73  | 1 | 1  | 1  | 3  | 0.816 | 1.265 | 1.110 | 1.173 | 3.47   | 4.73  | 2  | 3  | 148  | 16.9  | 5.39 |
| Q9NYF8 | Bcl-2-<br>associated<br>transcription<br>factor 1<br>OS=Homo<br>sapiens<br>GN=BCLAF1<br>PE=1 SV=2 -<br>[BCLF1_HUMAN]     | 23.70 | 1 | 25 | 25 | 80 | 1.088 | 1.399 | 0.984 | 1.173 | 180.25 | 23.70 | 36 | 80 | 920  | 106.1 | 9.98 |
| P61289 | Proteasome<br>activator<br>complex<br>subunit 3<br>OS=Homo<br>sapiens<br>GN=PSME3<br>PE=1 SV=1 -<br>[PSME3_HUMA<br>N]    | 42.13 | 1 | 10 | 10 | 56 | 0.916 | 0.815 | 0.822 | 1.174 | 151.75 | 42.13 | 17 | 56 | 254  | 29.5  | 5.95 |
| Q7L273 | BTB/POZ<br>domain-<br>containing<br>protein KCTD9<br>OS=Homo<br>sapiens<br>GN=KCTD9<br>PE=2 SV=1 -<br>[KCTD9_HUMAN<br>]  | 5.14  | 1 | 2  | 2  | 3  | 1.103 | 1.027 | 1.061 | 1.174 | 6.22   | 5.14  | 3  | 3  | 389  | 42.5  | 6.37 |
| O75970 | Multiple PDZ<br>domain protein<br>OS=Homo<br>sapiens<br>GN=MPDZ<br>PE=1 SV=2 -<br>[MPDZ_HUMAN]                           | 5.31  | 1 | 9  | 9  | 31 | 1.231 | 1.118 | 1.163 | 1.174 | 51.91  | 5.31  | 14 | 31 | 2070 | 221.5 | 5.06 |
| P30260 | Cell division<br>cycle protein<br>27 homolog<br>OS=Homo<br>sapiens<br>GN=CDC27<br>PE=1 SV=2 -<br>[CDC27_HUMAN<br>]       | 10.32 | 1 | 7  | 7  | 14 | 1.078 | 0.835 | 0.839 | 1.174 | 24.52  | 10.32 | 9  | 14 | 824  | 91.8  | 7.02 |

|        |                                                                                                                           |       |   |   |   |    |       |       |       |       |       |       |    |    |     |       |      |
|--------|---------------------------------------------------------------------------------------------------------------------------|-------|---|---|---|----|-------|-------|-------|-------|-------|-------|----|----|-----|-------|------|
| Q9P270 | SLAIN motif-containing protein 2<br>OS=Homo sapiens<br>GN=SLAIN2<br>PE=1 SV=2 - [SLAI2_HUMAN]                             | 15.66 | 1 | 9 | 9 | 18 | 1.149 | 1.065 | 1.108 | 1.174 | 37.76 | 15.66 | 15 | 18 | 581 | 62.5  | 9.45 |
| Q9HCG8 | Pre-mRNA-splicing factor CWC22 homolog<br>OS=Homo sapiens<br>GN=CWC22<br>PE=1 SV=3 - [CWC22_HUMAN]                        | 4.52  | 1 | 3 | 3 | 6  | 1.009 | 1.385 | 0.966 | 1.174 | 8.90  | 4.52  | 5  | 6  | 908 | 105.4 | 7.03 |
| Q5Y7A7 | HLA class II histocompatibility antigen, DRB1-13 beta chain<br>OS=Homo sapiens<br>GN=HLA-DRB1<br>PE=1 SV=1 - [2B1D_HUMAN] | 2.63  | 1 | 1 | 1 | 1  | 0.880 | 0.634 | 0.658 | 1.174 | 2.14  | 2.63  | 1  | 1  | 266 | 30.0  | 6.99 |
| Q9BX59 | Tapasin-related protein<br>OS=Homo sapiens<br>GN=TAPBP1<br>PE=1 SV=2 - [TPSNR_HUMAN]                                      | 5.77  | 1 | 2 | 2 | 18 | 1.390 | 0.832 | 0.722 | 1.174 | 42.49 | 5.77  | 4  | 18 | 468 | 50.2  | 5.26 |
| O75953 | DnaJ homolog subfamily B member 5<br>OS=Homo sapiens<br>GN=DNAJB5<br>PE=1 SV=1 - [DNJB5_HUMAN]                            | 2.59  | 1 | 1 | 1 | 2  | 0.838 | 1.572 | 2.033 | 1.174 | 7.60  | 2.59  | 2  | 2  | 348 | 39.1  | 9.04 |
| P15923 | Transcription factor E2-alpha<br>OS=Homo sapiens<br>GN=TCF3<br>PE=1 SV=1 - [TFE2_HUMAN]                                   | 1.22  | 1 | 1 | 1 | 1  | 1.082 | 1.023 | 1.080 | 1.174 | 0.00  | 1.22  | 1  | 1  | 654 | 67.6  | 6.47 |
| P15289 | Arylsulfatase A<br>OS=Homo sapiens<br>GN=ARSA<br>PE=1 SV=3 - [ARSA_HUMAN]                                                 | 17.55 | 1 | 7 | 7 | 30 | 0.771 | 1.086 | 1.176 | 1.174 | 91.89 | 17.55 | 12 | 30 | 507 | 53.6  | 6.07 |
| Q8IXM2 | Chromatin complexes subunit BAP18<br>OS=Homo sapiens<br>GN=BAP18<br>PE=1 SV=1 - [BAP18_HUMAN]                             | 26.74 | 1 | 3 | 3 | 12 | 0.896 | 1.438 | 1.138 | 1.174 | 30.03 | 26.74 | 5  | 12 | 172 | 17.9  | 7.33 |
| Q9NXH8 | Torsin-4A<br>OS=Homo sapiens<br>GN=TOR4A<br>PE=1 SV=2 - [TOR4A_HUMAN]                                                     | 21.99 | 1 | 7 | 8 | 13 | 1.164 | 0.897 | 0.744 | 1.174 | 35.77 | 21.99 | 12 | 13 | 423 | 46.9  | 9.94 |

|        |                                                                                                                             |       |   |    |    |    |       |       |       |       |        |       |    |    |     |       |       |
|--------|-----------------------------------------------------------------------------------------------------------------------------|-------|---|----|----|----|-------|-------|-------|-------|--------|-------|----|----|-----|-------|-------|
| Q8WWY3 | U4/U6 small<br>nuclear<br>ribonucleoprotein Prp31<br>OS=Homo sapiens<br>GN=PRPF31<br>PE=1 SV=2 - [PRP31_HUMAN]              | 14.83 | 1 | 7  | 8  | 22 | 1.235 | 1.267 | 0.910 | 1.175 | 51.18  | 14.83 | 10 | 22 | 499 | 55.4  | 5.78  |
| P83881 | 60S ribosomal protein L36a<br>OS=Homo sapiens<br>GN=RPL36A<br>PE=1 SV=2 - [RL36A_HUMAN]                                     | 40.57 | 1 | 2  | 8  | 40 | 0.872 | 1.410 | 0.936 | 1.175 | 101.72 | 40.57 | 14 | 40 | 106 | 12.4  | 10.58 |
| Q9NZQ3 | NCK-interacting protein with SH3 domain<br>OS=Homo sapiens<br>GN=NCKIPSD<br>PE=1 SV=1 - [SPN90_HUMAN]                       | 11.63 | 1 | 7  | 7  | 18 | 1.280 | 0.849 | 1.066 | 1.175 | 44.03  | 11.63 | 10 | 18 | 722 | 78.9  | 6.38  |
| O14920 | Inhibitor of nuclear factor kappa-B kinase subunit beta<br>OS=Homo sapiens<br>GN=IKBKB<br>PE=1 SV=1 - [IKKB_HUMAN]          | 25.13 | 1 | 14 | 14 | 45 | 1.278 | 1.307 | 1.358 | 1.175 | 114.35 | 25.13 | 21 | 45 | 756 | 86.5  | 5.78  |
| Q8IYL3 | UPF0688 protein C1orf174<br>OS=Homo sapiens<br>GN=C1orf174<br>PE=1 SV=2 - [CA174_HUMAN]                                     | 8.64  | 1 | 2  | 2  | 3  | 1.204 | 1.768 | 0.924 | 1.175 | 5.94   | 8.64  | 3  | 3  | 243 | 26.0  | 6.90  |
| O76021 | Ribosomal L1 domain-containing protein 1<br>OS=Homo sapiens<br>GN=RSL1D1<br>PE=1 SV=3 - [RL1D1_HUMAN]                       | 33.47 | 1 | 23 | 24 | 65 | 1.097 | 1.008 | 0.836 | 1.175 | 157.95 | 33.47 | 32 | 65 | 490 | 54.9  | 10.13 |
| P13861 | cAMP-dependent protein kinase type II-alpha regulatory subunit<br>OS=Homo sapiens<br>GN=PRKAR2A<br>PE=1 SV=2 - [KAP2_HUMAN] | 58.17 | 1 | 16 | 19 | 76 | 1.038 | 1.113 | 1.002 | 1.175 | 193.89 | 58.17 | 33 | 76 | 404 | 45.5  | 5.07  |
| O14936 | Peripheral plasma membrane protein CASK<br>OS=Homo sapiens<br>GN=CASK<br>PE=1 SV=3 - [CSKP_HUMAN]                           | 15.23 | 1 | 13 | 13 | 34 | 1.867 | 0.987 | 0.980 | 1.176 | 71.40  | 15.23 | 21 | 34 | 926 | 105.1 | 6.43  |

|        |                                                                                                                            |       |   |    |    |     |       |       |       |       |        |       |    |     |      |       |       |
|--------|----------------------------------------------------------------------------------------------------------------------------|-------|---|----|----|-----|-------|-------|-------|-------|--------|-------|----|-----|------|-------|-------|
| Q16718 | NADH dehydrogenase [ubiquinone] 1 alpha subcomplex subunit 5<br>OS=Homo sapiens<br>GN=NDUFA5<br>PE=1 SV=3 - [NDUFA5_HUMAN] | 66.38 | 1 | 5  | 5  | 26  | 0.608 | 1.070 | 0.817 | 1.176 | 69.64  | 66.38 | 9  | 26  | 116  | 13.5  | 5.99  |
| Q9UDT6 | CAP-Gly domain-containing linker protein 2<br>OS=Homo sapiens<br>GN=CLIP2<br>PE=1 SV=1 - [CLIP2_HUMAN]                     | 35.66 | 3 | 35 | 39 | 127 | 1.056 | 0.990 | 1.085 | 1.176 | 300.55 | 35.66 | 59 | 127 | 1046 | 115.8 | 6.73  |
| Q15906 | Vacuolar protein sorting-associated protein 72 homolog<br>OS=Homo sapiens<br>GN=VPS72<br>PE=1 SV=1 - [VPS72_HUMAN]         | 9.89  | 1 | 3  | 3  | 7   | 1.498 | 0.757 | 1.296 | 1.176 | 17.38  | 9.89  | 4  | 7   | 364  | 40.6  | 6.48  |
| Q9HB07 | UPF0160 protein MYG1, mitochondrial<br>OS=Homo sapiens<br>GN=C12orf10<br>PE=1 SV=2 - [MYG1_HUMAN]                          | 23.40 | 1 | 8  | 8  | 21  | 1.181 | 1.342 | 1.062 | 1.176 | 52.99  | 23.40 | 13 | 21  | 376  | 42.4  | 6.67  |
| P83369 | U7 snRNA-associated Sm-like protein LSM11<br>OS=Homo sapiens<br>GN=LSM11<br>PE=1 SV=2 - [LSM11_HUMAN]                      | 4.44  | 1 | 1  | 1  | 1   | 1.428 | 0.923 | 0.870 | 1.176 | 0.00   | 4.44  | 1  | 1   | 360  | 39.5  | 10.99 |
| Q96GQ7 | Probable ATP-dependent RNA helicase DDX27<br>OS=Homo sapiens<br>GN=DDX27<br>PE=1 SV=2 - [DDX27_HUMAN]                      | 14.20 | 1 | 12 | 12 | 29  | 0.974 | 1.096 | 0.792 | 1.177 | 54.49  | 14.20 | 16 | 29  | 796  | 89.8  | 9.28  |
| P49189 | 4-trimethylamino butyraldehyde dehydrogenase<br>OS=Homo sapiens<br>GN=ALDH9A1<br>PE=1 SV=3 - [AL9A1_HUMAN]                 | 45.75 | 1 | 20 | 20 | 111 | 1.104 | 1.020 | 0.915 | 1.177 | 211.26 | 45.75 | 30 | 111 | 494  | 53.8  | 5.87  |
| Q16762 | Thiosulfate sulfurtransferase<br>OS=Homo sapiens<br>GN=TST PE=1 SV=4 - [THTR_HUMAN]                                        | 32.66 | 1 | 8  | 9  | 29  | 1.278 | 1.300 | 1.136 | 1.177 | 65.71  | 32.66 | 15 | 29  | 297  | 33.4  | 7.25  |

|        |                                                                                                                                             |       |   |    |    |      |       |       |       |       |         |       |    |      |      |       |      |
|--------|---------------------------------------------------------------------------------------------------------------------------------------------|-------|---|----|----|------|-------|-------|-------|-------|---------|-------|----|------|------|-------|------|
| Q8TCB0 | Interferon-induced protein 44<br>OS=Homo sapiens<br>GN=IFI44<br>PE=2 SV=2 - [IFI44_HUMAN]                                                   | 2.70  | 1 | 1  | 2  | 6    | 0.808 | 0.875 | 0.888 | 1.177 | 14.26   | 2.70  | 2  | 6    | 444  | 50.5  | 6.89 |
| Q9UKM9 | RNA-binding protein Raly<br>OS=Homo sapiens<br>GN=RALY PE=1 SV=1 - [RALY_HUMAN]                                                             | 32.68 | 1 | 12 | 12 | 41   | 1.386 | 1.294 | 0.961 | 1.177 | 104.17  | 32.68 | 21 | 41   | 306  | 32.4  | 9.17 |
| Q96FZ2 | Embryonic stem cell-specific 5-hydroxymethylcytosine-binding protein<br>OS=Homo sapiens<br>GN=HMCE5<br>PE=1 SV=1 - [HMCE5_HUMAN]            | 8.76  | 1 | 2  | 2  | 3    | 1.095 | 1.094 | 1.097 | 1.177 | 9.02    | 8.76  | 3  | 3    | 354  | 40.5  | 8.15 |
| Q86V85 | Integral membrane protein GPR180<br>OS=Homo sapiens<br>GN=GPR180<br>PE=2 SV=1 - [GPR180_HUMAN]                                              | 3.41  | 1 | 1  | 1  | 2    | 1.076 | 0.845 | 0.603 | 1.177 | 5.87    | 3.41  | 2  | 2    | 440  | 49.4  | 7.39 |
| Q9NX14 | NADH dehydrogenase [ubiquinone] 1 beta subcomplex subunit 11, mitochondrial<br>OS=Homo sapiens<br>GN=NDUFB11<br>PE=1 SV=1 - [NDUFB11_HUMAN] | 18.30 | 1 | 2  | 2  | 5    | 1.079 | 0.450 | 0.262 | 1.178 | 17.60   | 18.30 | 3  | 5    | 153  | 17.3  | 5.22 |
| Q8NEZ5 | F-box only protein 22<br>OS=Homo sapiens<br>GN=FBXO22<br>PE=1 SV=1 - [FBXO22_HUMAN]                                                         | 7.20  | 1 | 3  | 3  | 9    | 1.213 | 0.702 | 1.016 | 1.178 | 21.90   | 7.20  | 5  | 9    | 403  | 44.5  | 7.03 |
| Q9ULK4 | Mediator of RNA polymerase II transcription subunit 23<br>OS=Homo sapiens<br>GN=MED23<br>PE=1 SV=2 - [MED23_HUMAN]                          | 4.90  | 1 | 5  | 5  | 7    | 1.191 | 1.118 | 1.126 | 1.178 | 7.57    | 4.90  | 5  | 7    | 1368 | 156.4 | 7.40 |
| P11142 | Heat shock cognate 71 kDa protein<br>OS=Homo sapiens<br>GN=HSPA8<br>PE=1 SV=1 - [HSPA8_HUMAN]                                               | 69.04 | 1 | 32 | 51 | 1967 | 1.033 | 0.994 | 1.117 | 1.178 | 4797.12 | 69.04 | 91 | 1967 | 646  | 70.9  | 5.52 |

|        |                                                                                                                                                        |       |   |    |    |     |       |       |       |       |        |       |    |     |      |       |       |
|--------|--------------------------------------------------------------------------------------------------------------------------------------------------------|-------|---|----|----|-----|-------|-------|-------|-------|--------|-------|----|-----|------|-------|-------|
| Q9BU76 | Multiple myeloma tumor-associated protein 2<br>OS=Homo sapiens<br>GN=MMTAG2<br>PE=1 SV=1 - [MMTA2_HUMAN]<br>X-ray repair cross-complementing protein 6 | 3.04  | 1 | 1  | 1  | 2   | 1.002 | 1.239 | 1.098 | 1.178 | 0.00   | 3.04  | 2  | 2   | 263  | 29.4  | 10.02 |
| P12956 | OS=Homo sapiens<br>GN=XRCC6<br>PE=1 SV=2 - [XRCC6_HUMAN]<br>2',5'-phosphodiesterase 12                                                                 | 50.25 | 1 | 30 | 31 | 226 | 1.149 | 1.164 | 0.902 | 1.178 | 586.73 | 50.25 | 51 | 226 | 609  | 69.8  | 6.64  |
| Q6L8Q7 | OS=Homo sapiens<br>GN=PDE12<br>PE=1 SV=2 - [PDE12_HUMAN]                                                                                               | 16.58 | 1 | 8  | 9  | 27  | 1.007 | 1.119 | 1.292 | 1.178 | 53.12  | 16.58 | 15 | 27  | 609  | 67.3  | 6.57  |
| P04222 | HLA class I histocompatibility antigen, Cw-3 alpha chain<br>OS=Homo sapiens<br>GN=HLA-C<br>PE=1 SV=2 - [1C03_HUMAN]                                    | 35.79 | 1 | 2  | 10 | 90  | 2.390 | 0.556 | 0.826 | 1.178 | 223.61 | 35.79 | 17 | 90  | 366  | 40.8  | 6.39  |
| O60870 | DNA/RNA-binding protein KIN17<br>OS=Homo sapiens<br>GN=KIN PE=1 SV=2 - [KIN17_HUMAN]                                                                   | 3.56  | 1 | 1  | 2  | 2   | 0.836 | 0.973 | 0.910 | 1.178 | 3.92   | 3.56  | 2  | 2   | 393  | 45.3  | 8.95  |
| Q9UPQ9 | Trinucleotide repeat-containing gene 6B protein<br>OS=Homo sapiens<br>GN=TNRC6B<br>PE=1 SV=4 - [TNRC6B_HUMAN]                                          | 2.56  | 1 | 4  | 4  | 9   | 0.991 | 1.077 | 0.799 | 1.178 | 15.96  | 2.56  | 6  | 9   | 1833 | 193.9 | 6.76  |
| Q2T9J0 | Peroxisomal leader peptide-processing protease<br>OS=Homo sapiens<br>GN=TYSD1<br>PE=1 SV=3 - [TYSD1_HUMAN]                                             | 3.18  | 1 | 1  | 1  | 2   | 1.074 | 1.079 | 1.143 | 1.178 | 6.78   | 3.18  | 2  | 2   | 566  | 59.3  | 6.20  |
| P62136 | Serine/threonine-protein phosphatase PP1-alpha catalytic subunit<br>OS=Homo sapiens<br>GN=PPP1CA<br>PE=1 SV=1 - [PP1A_HUMAN]                           | 41.52 | 1 | 2  | 12 | 62  | 0.978 | 1.155 | 0.979 | 1.178 | 173.71 | 41.52 | 20 | 62  | 330  | 37.5  | 6.33  |



|        |                                                                                                                                                                                                                                                                                                  |       |   |    |    |    |       |       |       |       |        |       |    |    |      |       |       |
|--------|--------------------------------------------------------------------------------------------------------------------------------------------------------------------------------------------------------------------------------------------------------------------------------------------------|-------|---|----|----|----|-------|-------|-------|-------|--------|-------|----|----|------|-------|-------|
| Q16795 | NADH<br>dehydrogenase<br>[ubiquinone] 1<br>alpha<br>subcomplex<br>subunit 9,<br>mitochondrial<br>OS=Homo<br>sapiens<br>GN=NDUFA9<br>PE=1 SV=2 -<br>[NDUA9_HUMAN<br>]<br>Peptidyl-prolyl<br>dis-trans<br>isomerase<br>FKBP5<br>OS=Homo<br>sapiens<br>GN=FKBP5<br>PE=1 SV=2 -<br>[FKBP5_HUMAN<br>] | 26.53 | 1 | 8  | 10 | 23 | 0.661 | 1.030 | 0.777 | 1.178 | 61.22  | 26.53 | 14 | 23 | 377  | 42.5  | 9.80  |
| Q13451 | Tetratricopepti<br>de repeat<br>protein 9C<br>OS=Homo<br>sapiens<br>GN=TTC9C<br>PE=1 SV=1 -<br>[TTC9C_HUMAN<br>]<br>WD repeat-<br>containing<br>protein 59<br>OS=Homo<br>sapiens<br>GN=WDR59<br>PE=1 SV=2 -<br>[WDR59_HUMA<br>N]                                                                 | 21.01 | 1 | 8  | 9  | 29 | 0.650 | 1.139 | 1.087 | 1.178 | 78.38  | 21.01 | 12 | 29 | 457  | 51.2  | 5.90  |
| Q8N5M4 | Cytoplasmic<br>polyadenylation<br>element-<br>binding protein<br>4 OS=Homo<br>sapiens<br>GN=CPEB4<br>PE=1 SV=1 -<br>[CPEB4_HUMAN<br>]<br>60S ribosomal<br>protein L8<br>OS=Homo<br>sapiens<br>GN=RPL8 PE=1<br>SV=2 -<br>[RL8_HUMAN]                                                              | 17.54 | 1 | 3  | 3  | 11 | 1.153 | 1.476 | 1.356 | 1.178 | 20.57  | 17.54 | 5  | 11 | 171  | 20.0  | 8.92  |
| Q6PJ19 | NADPH-<br>cytochrome<br>P450<br>reductase<br>OS=Homo<br>sapiens<br>GN=POR PE=1<br>SV=2 -<br>[NCPR_HUMAN]                                                                                                                                                                                         | 4.83  | 1 | 3  | 4  | 5  | 1.114 | 1.551 | 1.331 | 1.178 | 8.73   | 4.83  | 4  | 5  | 974  | 109.7 | 7.91  |
| Q17RY0 | NADHT and WD<br>repeat domain-<br>containing<br>protein 2<br>OS=Homo<br>sapiens<br>GN=NWD2<br>PE=2 SV=3 -<br>[NWD2_HUMAN<br>]                                                                                                                                                                    | 4.25  | 1 | 2  | 2  | 5  | 1.225 | 0.742 | 1.039 | 1.179 | 7.54   | 4.25  | 3  | 5  | 729  | 80.1  | 7.18  |
| P62917 |                                                                                                                                                                                                                                                                                                  | 44.36 | 1 | 10 | 11 | 60 | 1.299 | 1.360 | 1.328 | 1.179 | 146.80 | 44.36 | 17 | 60 | 257  | 28.0  | 11.03 |
| Q9ULI1 |                                                                                                                                                                                                                                                                                                  | 0.86  | 1 | 1  | 1  | 2  | 0.656 | 0.594 | 2.038 | 1.179 | 5.35   | 0.86  | 1  | 2  | 1742 | 197.3 | 6.24  |
| P16435 |                                                                                                                                                                                                                                                                                                  | 30.13 | 1 | 16 | 16 | 43 | 1.057 | 0.755 | 0.897 | 1.179 | 126.74 | 30.13 | 25 | 43 | 677  | 76.6  | 5.58  |

|        |                                                                                                                                    |       |   |    |    |     |       |       |       |       |        |       |    |     |     |       |      |
|--------|------------------------------------------------------------------------------------------------------------------------------------|-------|---|----|----|-----|-------|-------|-------|-------|--------|-------|----|-----|-----|-------|------|
| Q5JTZ9 | Alanine--tRNA<br>ligase,<br>mitochondrial<br>OS=Homo<br>sapiens<br>GN=AARS2<br>PE=1 SV=1 -<br>[SYAM_HUMAN]                         | 10.05 | 2 | 9  | 9  | 39  | 1.021 | 1.304 | 1.101 | 1.179 | 70.18  | 10.05 | 17 | 39  | 985 | 107.3 | 6.27 |
| Q9NZ32 | Actin-related<br>protein 10<br>OS=Homo<br>sapiens<br>GN=ACTR10<br>PE=1 SV=1 -<br>[ARP10_HUMAN<br>]                                 | 24.46 | 1 | 6  | 7  | 16  | 1.462 | 1.254 | 1.055 | 1.179 | 46.86  | 24.46 | 10 | 16  | 417 | 46.3  | 7.37 |
| Q7Z3D6 | UPF0317<br>protein<br>C14orf159,<br>mitochondrial<br>OS=Homo<br>sapiens<br>GN=C14orf159<br>PE=1 SV=2 -<br>[CN159_HUMAN<br>]        | 7.31  | 3 | 5  | 5  | 14  | 0.869 | 1.876 | 1.100 | 1.179 | 29.33  | 7.31  | 6  | 14  | 616 | 66.4  | 6.79 |
| Q969E2 | Secretory<br>carrier-<br>associated<br>membrane<br>protein 4<br>OS=Homo<br>sapiens<br>GN=SCAMP4<br>PE=2 SV=1 -<br>[SCAM4_HUMA<br>] | 4.80  | 1 | 1  | 1  | 8   | 1.196 | 1.125 | 1.125 | 1.179 | 16.64  | 4.80  | 2  | 8   | 229 | 25.7  | 8.82 |
| P38117 | Electron<br>transfer<br>flavoprotein<br>subunit beta<br>OS=Homo<br>sapiens<br>GN=ETFB<br>PE=1 SV=3 -<br>[ETFB_HUMAN]               | 54.51 | 1 | 15 | 15 | 118 | 0.991 | 0.994 | 0.960 | 1.180 | 261.20 | 54.51 | 27 | 118 | 255 | 27.8  | 8.10 |
| Q7RTV3 | Zinc finger<br>protein 367<br>OS=Homo<br>sapiens<br>GN=ZNF367<br>PE=1 SV=1 -<br>[ZNF367_HUMAN<br>]                                 | 10.00 | 1 | 1  | 1  | 1   |       |       |       | 1.180 | 2.00   | 10.00 | 1  | 1   | 350 | 38.4  | 7.93 |
| Q96BQ5 | Coiled-coil<br>domain-<br>containing<br>protein 127<br>OS=Homo<br>sapiens<br>GN=CCDC127<br>PE=1 SV=1 -<br>[CC127_HUMAN<br>]        | 18.08 | 8 | 4  | 5  | 14  | 1.047 | 1.109 | 0.904 | 1.180 | 31.14  | 18.08 | 8  | 14  | 260 | 30.8  | 9.20 |
| Q6DJT9 | Zinc finger<br>protein PLAG1<br>OS=Homo<br>sapiens<br>GN=PLAG1<br>PE=1 SV=1 -<br>[PLAG1_HUMAN<br>]                                 | 2.20  | 1 | 1  | 1  | 1   | 0.691 |       |       | 1.180 | 1.94   | 2.20  | 1  | 1   | 500 | 55.9  | 8.56 |

|        |                                                                                                                                                                                                |       |   |    |    |     |       |       |       |       |         |       |    |     |      |       |      |
|--------|------------------------------------------------------------------------------------------------------------------------------------------------------------------------------------------------|-------|---|----|----|-----|-------|-------|-------|-------|---------|-------|----|-----|------|-------|------|
| Q9Y6R4 | Mitogen-activated protein kinase kinase kinase 4<br>OS=Homo sapiens<br>GN=MAP3K4<br>PE=1 SV=2 - [M3K4_HUMAN]                                                                                   | 4.60  | 1 | 7  | 10 | 16  | 0.937 | 1.094 | 1.026 | 1.180 | 33.67   | 4.60  | 13 | 16  | 1608 | 181.6 | 6.32 |
| Q96L34 | MAP/microtubule affinity-regulating kinase 4<br>OS=Homo sapiens<br>GN=MARK4<br>PE=1 SV=1 - [MARK4_HUMAN]                                                                                       | 6.52  | 1 | 2  | 3  | 4   | 1.549 | 0.730 | 1.009 | 1.180 | 6.18    | 6.52  | 3  | 4   | 752  | 82.5  | 9.66 |
| Q9NZL9 | Methionine adenosyltransferase 2 subunit beta<br>OS=Homo sapiens<br>GN=MAT2B<br>PE=1 SV=1 - [MAT2B_HUMAN]<br>THO complex subunit 1<br>OS=Homo sapiens<br>GN=THOC1<br>PE=1 SV=1 - [THOC1_HUMAN] | 41.92 | 1 | 13 | 13 | 50  | 1.254 | 1.174 | 1.072 | 1.180 | 96.60   | 41.92 | 20 | 50  | 334  | 37.5  | 7.36 |
| Q96FV9 | Rho guanine nucleotide exchange factor 28<br>OS=Homo sapiens<br>GN=ARG28<br>PE=1 SV=3 - [ARG28_HUMAN]                                                                                          | 3.46  | 1 | 6  | 6  | 13  | 1.155 | 0.862 | 1.137 | 1.181 | 26.72   | 3.46  | 10 | 13  | 1705 | 191.8 | 6.04 |
| P22626 | Heterogeneous nuclear ribonucleoproteins A2/B1<br>OS=Homo sapiens<br>GN=HNRNPA2B1<br>PE=1 SV=2 - [ROA2_HUMAN]                                                                                  | 65.44 | 1 | 24 | 28 | 559 | 1.139 | 1.296 | 0.979 | 1.181 | 1573.89 | 65.44 | 51 | 559 | 353  | 37.4  | 8.95 |
| Q9H251 | Cadherin-23<br>OS=Homo sapiens<br>GN=CDH23<br>PE=1 SV=2 - [CAD23_HUMAN]                                                                                                                        | 1.01  | 1 | 2  | 3  | 3   | 0.913 | 0.949 | 1.390 | 1.181 | 2.54    | 1.01  | 3  | 3   | 3354 | 369.3 | 4.67 |
| P0C221 | Coiled-coil domain-containing protein 175<br>OS=Homo sapiens<br>GN=CCDC175<br>PE=2 SV=2 - [CC175_HUMAN]                                                                                        | 1.51  | 2 | 2  | 2  | 3   | 1.630 | 0.565 | 0.666 | 1.181 | 8.08    | 1.51  | 2  | 3   | 793  | 93.6  | 6.71 |

|        |                                                                                                       |       |   |    |    |    |       |       |       |       |        |       |    |    |      |       |      |
|--------|-------------------------------------------------------------------------------------------------------|-------|---|----|----|----|-------|-------|-------|-------|--------|-------|----|----|------|-------|------|
| Q9NRC6 | Spectrin beta chain, non-erythrocytic 5<br>OS=Homo sapiens<br>GN=SPTBN5<br>PE=1 SV=2 - [SPTN5_HUMAN]  | 1.20  | 1 | 4  | 4  | 4  | 0.969 | 0.955 | 1.024 | 1.181 | 8.30   | 1.20  | 4  | 4  | 3674 | 416.5 | 6.65 |
| Q96ST3 | Paired amphipathic helix protein Sin3a<br>OS=Homo sapiens<br>GN=SIN3A<br>PE=1 SV=2 - [SIN3A_HUMAN]    | 9.51  | 1 | 12 | 12 | 25 | 1.339 | 1.314 | 0.898 | 1.181 | 56.37  | 9.51  | 17 | 25 | 1273 | 145.1 | 7.25 |
| O43426 | Synaptojanin-1<br>OS=Homo sapiens<br>GN=SYNJ1<br>PE=1 SV=2 - [SYNJ1_HUMAN]                            | 4.32  | 1 | 6  | 6  | 25 | 1.095 | 1.080 | 1.042 | 1.181 | 52.25  | 4.32  | 10 | 25 | 1573 | 173.0 | 7.42 |
| Q14814 | Myocyte-specific enhancer factor 2D<br>OS=Homo sapiens<br>GN=MEF2D<br>PE=1 SV=1 - [MEF2D_HUMAN]       | 17.66 | 1 | 5  | 5  | 11 | 1.079 | 1.346 | 1.108 | 1.181 | 22.70  | 17.66 | 9  | 11 | 521  | 55.9  | 7.88 |
| Q96J88 | Epithelial-stromal interaction protein 1<br>OS=Homo sapiens<br>GN=EPSTI1<br>PE=2 SV=2 - [ESIP1_HUMAN] | 5.97  | 1 | 2  | 2  | 3  | 1.820 | 1.021 | 0.955 | 1.181 | 2.35   | 5.97  | 3  | 3  | 318  | 36.8  | 9.89 |
| Q00613 | Heat shock factor protein 1<br>OS=Homo sapiens<br>GN=HSF1<br>PE=1 SV=1 - [HSF1_HUMAN]                 | 6.81  | 1 | 2  | 2  | 4  | 1.297 | 1.702 | 1.443 | 1.182 | 10.04  | 6.81  | 3  | 4  | 529  | 57.2  | 5.19 |
| P82650 | 28S ribosomal protein S22, mitochondrial<br>OS=Homo sapiens<br>GN=MRPS22<br>PE=1 SV=1 - [RT22_HUMAN]  | 26.11 | 1 | 8  | 8  | 25 | 0.832 | 1.192 | 0.922 | 1.182 | 61.54  | 26.11 | 14 | 25 | 360  | 41.3  | 7.90 |
| O75828 | Carbonyl reductase [NADPH] 3<br>OS=Homo sapiens<br>GN=CBR3<br>PE=1 SV=3 - [CBR3_HUMAN]                | 45.13 | 1 | 9  | 12 | 71 | 1.436 | 1.316 | 1.719 | 1.182 | 155.31 | 45.13 | 19 | 71 | 277  | 30.8  | 6.18 |

|        |                                                                                                                    |       |   |   |   |    |       |       |       |       |       |       |   |    |      |       |       |
|--------|--------------------------------------------------------------------------------------------------------------------|-------|---|---|---|----|-------|-------|-------|-------|-------|-------|---|----|------|-------|-------|
| O75448 | Mediator of RNA polymerase II transcription subunit 24<br>OS=Homo sapiens<br>GN=MED24<br>PE=1 SV=1 - [MED24_HUMAN] | 3.44  | 1 | 3 | 3 | 3  | 1.236 | 1.219 | 0.905 | 1.182 | 6.99  | 3.44  | 3 | 3  | 989  | 110.2 | 6.95  |
| Q9NY61 | Protein AATF<br>OS=Homo sapiens<br>GN=AATF<br>PE=1 SV=1 - [AATF_HUMAN]                                             | 4.82  | 1 | 2 | 2 | 2  | 0.944 | 1.113 | 1.255 | 1.182 | 6.07  | 4.82  | 2 | 2  | 560  | 63.1  | 4.94  |
| Q96S15 | WD repeat-containing protein 24<br>OS=Homo sapiens<br>GN=WDR24<br>PE=1 SV=1 - [WDR24_HUMAN]                        | 1.63  | 1 | 1 | 1 | 1  | 1.424 | 0.863 | 0.645 | 1.182 | 3.01  | 1.63  | 1 | 1  | 920  | 101.9 | 6.58  |
| Q8WXG9 | G-protein coupled receptor 98<br>OS=Homo sapiens<br>GN=GPR98<br>PE=1 SV=2 - [GPR98_HUMAN]                          | 0.65  | 1 | 2 | 3 | 3  | 1.469 | 0.827 | 0.737 | 1.182 | 3.44  | 0.65  | 3 | 3  | 6306 | 692.6 | 4.64  |
| P42773 | Cyclin-dependent kinase 4 inhibitor C<br>OS=Homo sapiens<br>GN=CDKN2C<br>PE=1 SV=1 - [CDN2C_HUMAN]                 | 14.88 | 1 | 3 | 3 | 8  | 0.822 | 2.454 | 0.979 | 1.183 | 13.63 | 14.88 | 4 | 8  | 168  | 18.1  | 6.52  |
| P63173 | 60S ribosomal protein L38<br>OS=Homo sapiens<br>GN=RPL38<br>PE=1 SV=2 - [RL38_HUMAN]                               | 52.86 | 1 | 4 | 5 | 19 | 1.208 | 0.920 | 0.901 | 1.183 | 41.96 | 52.86 | 8 | 19 | 70   | 8.2   | 10.10 |
| P05231 | Interleukin-6<br>OS=Homo sapiens<br>GN=IL6<br>PE=1 SV=1 - [IL6_HUMAN]                                              | 3.30  | 1 | 1 | 1 | 1  | 1.872 | 0.442 | 1.159 | 1.183 | 1.91  | 3.30  | 1 | 1  | 212  | 23.7  | 6.57  |
| Q13938 | Calyphosin<br>OS=Homo sapiens<br>GN=CAPS<br>PE=1 SV=1 - [CAYP1_HUMAN]                                              | 9.52  | 1 | 2 | 2 | 12 | 1.310 | 1.931 | 0.431 | 1.183 | 27.12 | 9.52  | 2 | 12 | 189  | 21.0  | 4.89  |
| Q8WVQ1 | Soluble calcium-activated nucleotidase 1<br>OS=Homo sapiens<br>GN=CANT1<br>PE=1 SV=1 - [CANT1_HUMAN]               | 3.49  | 1 | 1 | 1 | 3  | 0.628 | 0.945 | 1.083 | 1.183 | 9.36  | 3.49  | 1 | 3  | 401  | 44.8  | 6.09  |

|        |                                                                                                               |       |   |    |    |    |       |       |       |       |        |       |    |    |      |       |       |
|--------|---------------------------------------------------------------------------------------------------------------|-------|---|----|----|----|-------|-------|-------|-------|--------|-------|----|----|------|-------|-------|
| Q24JP5 | Transmembrane protein 132A<br>OS=Homo sapiens<br>GN=TMEM132A<br>PE=2 SV=1 - [T132A_HUMAN]                     | 3.52  | 1 | 2  | 2  | 5  | 0.982 | 1.001 | 1.153 | 1.183 | 16.02  | 3.52  | 3  | 5  | 1023 | 110.0 | 5.62  |
| Q6NZ67 | Mitotic-spindle organizing protein 2B<br>OS=Homo sapiens<br>GN=MZT2B<br>PE=1 SV=1 - [MZT2B_HUMAN]             | 8.86  | 1 | 1  | 1  | 5  | 0.997 | 0.986 | 1.149 | 1.183 | 17.67  | 8.86  | 2  | 5  | 158  | 16.2  | 10.15 |
| Q96NA2 | Rab-interacting lysosomal protein<br>OS=Homo sapiens<br>GN=RILP PE=1 SV=1 - [RILP_HUMAN]                      | 2.24  | 1 | 1  | 1  | 1  | 1.093 | 0.994 | 0.887 | 1.183 | 1.96   | 2.24  | 1  | 1  | 401  | 44.2  | 5.59  |
| Q9Y2I7 | 1-phosphatidylinositol 3-kinase<br>OS=Homo sapiens<br>GN=PIKFYVE<br>PE=1 SV=3 - [FYV1_HUMAN]                  | 1.00  | 1 | 1  | 2  | 3  | 1.638 | 0.722 | 0.862 | 1.183 | 0.00   | 1.00  | 3  | 3  | 2098 | 237.0 | 6.70  |
| Q7RTP6 | Protein-methionine sulfoxide oxidase MICAL3<br>OS=Homo sapiens<br>GN=MICAL3<br>PE=1 SV=2 - [MICAL3_HUMAN]     | 6.99  | 1 | 12 | 13 | 24 | 0.939 | 1.381 | 1.303 | 1.183 | 37.86  | 6.99  | 17 | 24 | 2002 | 224.2 | 5.55  |
| Q6P1M0 | Long-chain fatty acid transport protein 4<br>OS=Homo sapiens<br>GN=SLC27A4<br>PE=1 SV=1 - [S27A4_HUMAN]       | 11.20 | 1 | 6  | 6  | 18 | 1.079 | 0.966 | 1.009 | 1.184 | 55.44  | 11.20 | 9  | 18 | 643  | 72.0  | 8.47  |
| P11117 | Lysosomal acid phosphatase<br>OS=Homo sapiens<br>GN=ACP2<br>PE=1 SV=3 - [PPAL_HUMAN]                          | 7.33  | 1 | 2  | 2  | 21 | 0.997 | 1.119 | 0.968 | 1.184 | 63.40  | 7.33  | 3  | 21 | 423  | 48.3  | 6.74  |
| Q16836 | Hydroxyacyl-coenzyme A dehydrogenase, mitochondrial<br>OS=Homo sapiens<br>GN=HADH<br>PE=1 SV=3 - [HCDH_HUMAN] | 66.24 | 1 | 17 | 18 | 78 | 0.944 | 1.471 | 1.061 | 1.184 | 176.71 | 66.24 | 26 | 78 | 314  | 34.3  | 8.85  |

|        |                                                                                                                                          |       |   |   |   |    |       |       |       |       |       |       |   |    |      |       |      |
|--------|------------------------------------------------------------------------------------------------------------------------------------------|-------|---|---|---|----|-------|-------|-------|-------|-------|-------|---|----|------|-------|------|
| P29372 | DNA-3-<br>methyladenine<br>glycosylase<br>OS=Homo<br>sapiens<br>GN=MPG PE=1<br>SV=3 -<br>[3MG_HUMAN]                                     | 21.81 | 1 | 5 | 5 | 13 | 1.216 | 1.159 | 1.322 | 1.184 | 30.94 | 21.81 | 9 | 13 | 298  | 32.8  | 9.57 |
| Q13503 | Mediator of<br>RNA<br>polymerase II<br>transcription<br>subunit 21<br>OS=Homo<br>sapiens<br>GN=MED21<br>PE=1 SV=1 -<br>[MED21_HUMA<br>N] | 12.50 | 1 | 1 | 1 | 2  | 1.031 | 0.758 | 0.596 | 1.184 | 9.96  | 12.50 | 2 | 2  | 144  | 15.6  | 4.45 |
| Q7Z6M1 | Rab9 effector<br>protein with<br>kelch motifs<br>OS=Homo<br>sapiens<br>GN=RABEPK<br>PE=1 SV=1 -<br>[RABEK_HUMAN<br>]                     | 5.65  | 1 | 2 | 2 | 4  | 0.713 | 1.571 | 0.818 | 1.184 | 11.76 | 5.65  | 3 | 4  | 372  | 40.5  | 6.25 |
| O75391 | Sperm-<br>associated<br>antigen 7<br>OS=Homo<br>sapiens<br>GN=SPAG7<br>PE=1 SV=2 -<br>[SPAG7_HUMAN<br>]                                  | 12.78 | 1 | 4 | 4 | 8  | 0.995 | 1.088 | 1.203 | 1.184 | 14.63 | 12.78 | 7 | 8  | 227  | 26.0  | 7.91 |
| Q9UKV5 | E3 ubiquitin-<br>protein ligase<br>AMFR<br>OS=Homo<br>sapiens<br>GN=AMFR<br>PE=1 SV=2 -<br>[AMFR_HUMAN]                                  | 9.95  | 1 | 4 | 4 | 12 | 1.021 | 0.893 | 0.878 | 1.184 | 28.67 | 9.95  | 7 | 12 | 643  | 72.9  | 6.39 |
| Q5T9G4 | Armadillo<br>repeat-<br>containing<br>protein 12<br>OS=Homo<br>sapiens<br>GN=ARMC12<br>PE=2 SV=1 -<br>[ARM12_HUMA<br>N]                  | 2.06  | 1 | 1 | 1 | 1  | 1.389 | 0.963 | 0.892 | 1.185 | 2.09  | 2.06  | 1 | 1  | 340  | 38.6  | 7.88 |
| Q8IXT5 | RNA-binding<br>protein 12B<br>OS=Homo<br>sapiens<br>GN=RBM12B<br>PE=1 SV=2 -<br>[RB12B_HUMAN<br>]                                        | 5.09  | 1 | 5 | 5 | 11 | 0.967 | 1.338 | 0.977 | 1.185 | 13.43 | 5.09  | 6 | 11 | 1001 | 118.0 | 6.81 |
| Q969Y2 | tRNA<br>modification<br>GTPase<br>GTPBP3,<br>mitochondrial<br>OS=Homo<br>sapiens<br>GN=GTPBP3<br>PE=1 SV=2 -<br>[GTPB3_HUMAN<br>]        | 3.05  | 1 | 1 | 1 | 1  | 0.329 | 0.751 | 1.230 | 1.185 | 0.00  | 3.05  | 1 | 1  | 492  | 52.0  | 6.48 |

|        |                                                                                                                                                                                               |       |   |    |    |    |       |       |       |       |        |       |    |    |      |       |      |
|--------|-----------------------------------------------------------------------------------------------------------------------------------------------------------------------------------------------|-------|---|----|----|----|-------|-------|-------|-------|--------|-------|----|----|------|-------|------|
| Q5PRF9 | Protein Smaug homolog 2<br>OS=Homo sapiens<br>GN=SAMD4B<br>PE=1 SV=1 - [SMAG2_HUMAN]<br>MORC family CW-type zinc finger protein 2<br>OS=Homo sapiens<br>GN=MORC2<br>PE=1 SV=2 - [MORC2_HUMAN] | 3.31  | 1 | 3  | 3  | 4  | 1.210 | 0.948 | 1.186 | 1.185 | 4.76   | 3.31  | 3  | 4  | 694  | 75.4  | 6.83 |
| Q9Y6X9 | E3 ubiquitin-protein ligase ARIH1<br>OS=Homo sapiens<br>GN=ARIH1<br>PE=1 SV=2 - [ARI1_HUMAN]                                                                                                  | 2.42  | 1 | 2  | 3  | 3  | 0.656 | 0.881 | 1.094 | 1.185 | 5.24   | 2.42  | 3  | 3  | 1032 | 117.7 | 8.38 |
| Q9Y4X5 | Zinc finger RNA-binding protein<br>OS=Homo sapiens<br>GN=ZFR PE=1 SV=2 - [ZFR_HUMAN]                                                                                                          | 12.21 | 1 | 6  | 6  | 23 | 1.064 | 1.113 | 1.080 | 1.185 | 55.79  | 12.21 | 12 | 23 | 557  | 64.1  | 5.08 |
| Q96KR1 | Ubiquitin-like protein ATG12<br>OS=Homo sapiens<br>GN=ATG12<br>PE=1 SV=1 - [ATG12_HUMAN]<br>Sharpin<br>OS=Homo sapiens<br>GN=SHARPIN<br>PE=1 SV=1 - [SHRPN_HUMAN]                             | 20.30 | 1 | 19 | 19 | 52 | 0.986 | 1.136 | 0.980 | 1.185 | 118.04 | 20.30 | 29 | 52 | 1074 | 116.9 | 9.04 |
| O94817 | Probable ATP-dependent RNA helicase DDX60<br>OS=Homo sapiens<br>GN=DDX60<br>PE=1 SV=3 - [DDX60_HUMAN]<br>RNA-binding protein 33<br>OS=Homo sapiens<br>GN=RBM33<br>PE=1 SV=3 - [RBM33_HUMAN]   | 6.43  | 1 | 1  | 1  | 6  | 1.151 | 1.353 | 1.221 | 1.185 | 15.49  | 6.43  | 2  | 6  | 140  | 15.1  | 5.10 |
| Q9H0F6 | Versican core protein<br>OS=Homo sapiens<br>GN=VCAN<br>PE=1 SV=3 - [CSPG2_HUMAN]                                                                                                              | 6.98  | 1 | 2  | 2  | 3  | 1.006 | 1.050 | 1.254 | 1.185 | 4.22   | 6.98  | 3  | 3  | 387  | 39.9  | 5.80 |
| Q8IY21 |                                                                                                                                                                                               | 0.53  | 1 | 1  | 1  | 1  | 1.265 | 1.171 | 1.415 | 1.186 | 1.75   | 0.53  | 1  | 1  | 1712 | 197.7 | 7.59 |
| Q96EV2 |                                                                                                                                                                                               | 4.36  | 1 | 3  | 4  | 15 | 1.068 | 1.225 | 0.857 | 1.186 | 29.04  | 4.36  | 6  | 15 | 1170 | 129.9 | 6.93 |
| P13611 |                                                                                                                                                                                               | 0.82  | 1 | 2  | 2  | 11 | 1.666 | 0.866 | 1.416 | 1.186 | 9.74   | 0.82  | 2  | 11 | 3396 | 372.6 | 4.51 |



|         |                                                                                                                                     |       |   |   |    |    |       |       |       |       |        |       |    |    |     |       |      |
|---------|-------------------------------------------------------------------------------------------------------------------------------------|-------|---|---|----|----|-------|-------|-------|-------|--------|-------|----|----|-----|-------|------|
| Q5T601  | Probable G-protein coupled receptor 110<br>OS=Homo sapiens<br>GN=GPR110<br>PE=2 SV=2 - [GP110_HUMAN<br>Negative elongation factor B | 1.87  | 1 | 1 | 1  | 1  | 0.976 | 1.481 | 1.404 | 1.186 | 2.92   | 1.87  | 1  | 1  | 910 | 101.3 | 8.62 |
| Q8WX92  | OS=Homo sapiens<br>GN=NELFB<br>PE=1 SV=1 - [NELFB_HUMAN<br>] NEDD4-binding protein 1                                                | 17.07 | 1 | 9 | 11 | 28 | 1.225 | 1.459 | 1.003 | 1.186 | 54.87  | 17.07 | 19 | 28 | 580 | 65.7  | 6.13 |
| O75113  | OS=Homo sapiens<br>GN=N4BP1<br>PE=1 SV=4 - [N4BP1_HUMAN<br>] SAP domain-containing ribonucleoprotein                                | 5.69  | 1 | 4 | 4  | 9  | 1.058 | 1.076 | 1.243 | 1.186 | 14.78  | 5.69  | 5  | 9  | 896 | 100.3 | 5.36 |
| P82979  | OS=Homo sapiens<br>GN=SARNP<br>PE=1 SV=3 - [SARNP_HUMAN<br>] Glutaredoxin-1                                                         | 29.05 | 1 | 5 | 5  | 25 | 1.129 | 1.275 | 1.027 | 1.186 | 58.76  | 29.05 | 10 | 25 | 210 | 23.7  | 6.42 |
| P35754  | OS=Homo sapiens<br>GN=GLRX<br>PE=1 SV=2 - [GLRX1_HUMAN<br>] Splicing factor U2AF 35 kDa subunit                                     | 66.04 | 1 | 6 | 6  | 89 | 1.705 | 0.455 | 0.840 | 1.186 | 220.23 | 66.04 | 11 | 89 | 106 | 11.8  | 8.09 |
| Q01081  | OS=Homo sapiens<br>GN=U2AF1<br>PE=1 SV=3 - [U2AF1_HUMAN<br>] Autophagy-related protein 16-1                                         | 35.42 | 2 | 5 | 5  | 29 | 1.063 | 1.241 | 1.079 | 1.187 | 62.02  | 35.42 | 8  | 29 | 240 | 27.9  | 8.81 |
| Q676U5  | OS=Homo sapiens<br>GN=ATG16L1<br>PE=1 SV=2 - [A16L1_HUMAN<br>] Mediator of RNA polymerase II transcription subunit 19               | 9.06  | 1 | 7 | 7  | 15 | 1.002 | 0.988 | 1.173 | 1.187 | 26.50  | 9.06  | 11 | 15 | 607 | 68.2  | 6.64 |
| A0JLT2  | OS=Homo sapiens<br>GN=MED19<br>PE=1 SV=2 - [MED19_HUMAN<br>] WD repeat-containing protein 82                                        | 15.16 | 1 | 2 | 2  | 10 | 0.875 | 1.231 | 1.332 | 1.187 | 6.36   | 15.16 | 3  | 10 | 244 | 26.3  | 9.82 |
| Q6LUXN9 | OS=Homo sapiens<br>GN=WDR82<br>PE=1 SV=1 - [WDR82_HUMAN<br>] WD repeat-containing protein 82                                        | 20.45 | 1 | 6 | 6  | 17 | 1.103 | 1.307 | 0.874 | 1.187 | 38.57  | 20.45 | 9  | 17 | 313 | 35.1  | 7.69 |

|        |                                                                                                                  |       |   |    |    |    |       |       |       |       |        |       |    |    |      |       |      |
|--------|------------------------------------------------------------------------------------------------------------------|-------|---|----|----|----|-------|-------|-------|-------|--------|-------|----|----|------|-------|------|
| P51153 | Ras-related protein Rab-13<br>OS=Homo sapiens<br>GN=RAB13<br>PE=1 SV=1 - [RAB13_HUMAN]                           | 55.67 | 1 | 10 | 13 | 76 | 1.357 | 1.306 | 0.815 | 1.187 | 163.01 | 55.67 | 20 | 76 | 203  | 22.8  | 9.19 |
| Q99941 | Cyclic AMP-dependent transcription factor ATF-6 beta<br>OS=Homo sapiens<br>GN=ATF6B<br>PE=1 SV=2 - [ATF6B_HUMAN] | 1.71  | 1 | 1  | 1  | 2  | 0.819 | 1.098 | 1.180 | 1.187 | 4.36   | 1.71  | 2  | 2  | 703  | 76.7  | 6.27 |
| O95672 | Endothelin-converting enzyme-like 1<br>OS=Homo sapiens<br>GN=ECELL<br>PE=1 SV=3 - [ECELL_HUMAN]                  | 1.42  | 1 | 1  | 1  | 2  | 1.320 | 1.018 | 1.222 | 1.187 | 5.73   | 1.42  | 1  | 2  | 775  | 87.7  | 7.03 |
| P12882 | Myosin-1<br>OS=Homo sapiens<br>GN=MYH1<br>PE=1 SV=3 - [MYH1_HUMAN]                                               | 6.81  | 2 | 3  | 13 | 87 | 0.995 | 1.017 | 1.039 | 1.187 | 171.30 | 6.81  | 16 | 87 | 1939 | 223.0 | 5.74 |
| Q9H583 | HEAT repeat-containing protein 1<br>OS=Homo sapiens<br>GN=HEATR1<br>PE=1 SV=3 - [HEATR1_HUMAN]                   | 5.13  | 1 | 10 | 10 | 23 | 0.804 | 0.862 | 0.838 | 1.187 | 43.37  | 5.13  | 16 | 23 | 2144 | 242.2 | 6.54 |
| P16949 | Stathmin<br>OS=Homo sapiens<br>GN=STMN1<br>PE=1 SV=3 - [STMN1_HUMAN]                                             | 48.99 | 4 | 11 | 12 | 85 | 1.378 | 1.698 | 0.915 | 1.188 | 179.54 | 48.99 | 18 | 85 | 149  | 17.3  | 5.97 |
| O75616 | GTPase Era, mitochondrial<br>OS=Homo sapiens<br>GN=ERALL<br>PE=1 SV=2 - [ERALL_HUMAN]                            | 6.41  | 1 | 2  | 2  | 5  | 1.264 | 0.877 | 1.059 | 1.188 | 2.11   | 6.41  | 2  | 5  | 437  | 48.3  | 8.84 |
| Q96JM3 | Chromosome alignment-maintaining phosphoprotein 1<br>OS=Homo sapiens<br>GN=CHAMP1<br>PE=1 SV=2 - [CHAMP1_HUMAN]  | 13.42 | 1 | 10 | 10 | 17 | 1.133 | 1.344 | 1.048 | 1.188 | 28.87  | 13.42 | 15 | 17 | 812  | 89.0  | 8.44 |
| Q13685 | Angio-associated migratory cell protein<br>OS=Homo sapiens<br>GN=AAMP<br>PE=1 SV=2 - [AAMP_HUMAN]                | 10.14 | 1 | 4  | 4  | 12 | 0.853 | 1.205 | 1.119 | 1.188 | 23.99  | 10.14 | 5  | 12 | 434  | 46.7  | 4.42 |

|        |                                                                                                                      |       |   |    |    |    |       |       |       |       |        |       |    |    |      |       |      |
|--------|----------------------------------------------------------------------------------------------------------------------|-------|---|----|----|----|-------|-------|-------|-------|--------|-------|----|----|------|-------|------|
| P69849 | Nodal<br>modulator 3<br>OS=Homo<br>sapiens<br>GN=NOMO3<br>PE=2 SV=2 -<br>[NOMO3_HUMAN]                               | 19.31 | 2 | 2  | 20 | 73 | 0.973 | 0.746 | 0.688 | 1.188 | 185.42 | 19.31 | 32 | 73 | 1222 | 134.0 | 5.67 |
| Q92797 | Symplekin<br>OS=Homo<br>sapiens<br>GN=SYMPK<br>PE=1 SV=2 -<br>[SYMPK_HUMAN]                                          | 9.11  | 1 | 8  | 8  | 20 | 1.009 | 1.301 | 1.136 | 1.188 | 46.06  | 9.11  | 13 | 20 | 1274 | 141.1 | 6.13 |
| Q8WU79 | Stromal<br>membrane-<br>associated<br>protein 2<br>OS=Homo<br>sapiens<br>GN=SMAP2<br>PE=1 SV=1 -<br>[SMAP2_HUMAN]    | 13.52 | 1 | 5  | 5  | 15 | 1.134 | 0.969 | 0.952 | 1.189 | 38.45  | 13.52 | 7  | 15 | 429  | 46.8  | 8.87 |
| Q6YN16 | Hydroxysteroid<br>dehydrogenase-<br>like protein 2<br>OS=Homo<br>sapiens<br>GN=HSDL2<br>PE=1 SV=1 -<br>[HSDL2_HUMAN] | 35.41 | 1 | 12 | 12 | 54 | 0.836 | 1.174 | 1.076 | 1.189 | 178.42 | 35.41 | 20 | 54 | 418  | 45.4  | 7.99 |
| Q9NR28 | Diablo<br>homolog,<br>mitochondrial<br>OS=Homo<br>sapiens<br>GN=DIABLO<br>PE=1 SV=1 -<br>[DBL1H_HUMAN]               | 28.45 | 1 | 6  | 6  | 28 | 1.108 | 1.177 | 1.133 | 1.189 | 70.96  | 28.45 | 11 | 28 | 239  | 27.1  | 5.90 |
| Q92621 | Nuclear pore<br>complex<br>protein<br>Nup205<br>OS=Homo<br>sapiens<br>GN=NUP205<br>PE=1 SV=3 -<br>[NU205_HUMAN]      | 8.50  | 1 | 18 | 18 | 40 | 1.115 | 1.025 | 0.887 | 1.189 | 93.03  | 8.50  | 29 | 40 | 2012 | 227.8 | 6.19 |
| Q9Y2D4 | Exocyst complex<br>component 6B<br>OS=Homo<br>sapiens<br>GN=EXOC6B<br>PE=1 SV=3 -<br>[EXC6B_HUMAN]                   | 20.22 | 2 | 14 | 16 | 43 | 1.244 | 0.955 | 1.067 | 1.189 | 107.07 | 20.22 | 22 | 43 | 811  | 94.1  | 6.46 |
| Q9NQG7 | Hermansky-<br>Pudlak<br>syndrome 4<br>protein<br>OS=Homo<br>sapiens<br>GN=HPS4<br>PE=1 SV=2 -<br>[HPS4_HUMAN]        | 2.54  | 1 | 1  | 1  | 1  | 1.021 | 0.814 | 1.095 | 1.189 | 0.00   | 2.54  | 1  | 1  | 708  | 76.9  | 5.45 |
| Q9HAT2 | Sialate O-<br>acetyltransferase<br>OS=Homo<br>sapiens<br>GN=SIAE PE=1<br>SV=1 -<br>[SIAE_HUMAN]                      | 10.52 | 1 | 6  | 6  | 18 | 0.794 | 0.978 | 0.997 | 1.190 | 41.32  | 10.52 | 11 | 18 | 523  | 58.3  | 7.33 |

|        |                                                                                                                              |       |   |   |   |    |       |       |       |       |       |       |   |    |      |       |      |
|--------|------------------------------------------------------------------------------------------------------------------------------|-------|---|---|---|----|-------|-------|-------|-------|-------|-------|---|----|------|-------|------|
| Q43663 | Protein regulator of cytokinesis 1<br>OS=Homo sapiens<br>GN=PRC1<br>PE=1 SV=2 - [PRC1_HUMAN]                                 | 6.77  | 3 | 3 | 6 | 12 | 1.062 | 1.007 | 0.926 | 1.190 | 20.92 | 6.77  | 6 | 12 | 620  | 71.6  | 6.68 |
| Q9Y692 | Glucocorticoid modulatory element-binding protein 1<br>OS=Homo sapiens<br>GN=GMEB1<br>PE=1 SV=2 - [GMEB1_HUMAN]              | 2.62  | 2 | 2 | 3 | 9  | 1.924 | 1.456 | 1.018 | 1.190 | 22.87 | 2.62  | 3 | 9  | 573  | 62.6  | 4.83 |
| Q6KC79 | Nipped-B-like protein<br>OS=Homo sapiens<br>GN=NIPBL<br>PE=1 SV=2 - [NIPBL_HUMAN]                                            | 2.03  | 1 | 6 | 6 | 7  | 1.246 | 1.362 | 1.123 | 1.190 | 6.40  | 2.03  | 7 | 7  | 2804 | 315.9 | 7.91 |
| Q8N9N8 | Probable RNA-binding protein EIF1AD<br>OS=Homo sapiens<br>GN=EIF1AD<br>PE=1 SV=1 - [EIF1A_HUMAN]                             | 10.30 | 1 | 1 | 1 | 5  | 1.332 | 0.902 | 1.114 | 1.190 | 15.20 | 10.30 | 2 | 5  | 165  | 19.0  | 5.21 |
| Q8M4H5 | Mitochondrial import receptor subunit TOM5 homolog<br>OS=Homo sapiens<br>GN=TOMM5<br>PE=1 SV=1 - [TOM5_HUMAN]                | 41.18 | 1 | 3 | 3 | 10 | 1.064 | 0.740 | 0.544 | 1.190 | 21.19 | 41.18 | 5 | 10 | 51   | 6.0   | 9.70 |
| Q9BSH5 | Halooxid dehalogenase-like hydrolase domain-containing protein 3<br>OS=Homo sapiens<br>GN=HDHD3<br>PE=1 SV=1 - [HDHD3_HUMAN] | 22.31 | 1 | 4 | 4 | 9  | 0.794 | 1.422 | 1.079 | 1.190 | 21.32 | 22.31 | 6 | 9  | 251  | 28.0  | 6.71 |
| Q96I25 | Splicing factor 45<br>OS=Homo sapiens<br>GN=RBM17<br>PE=1 SV=1 - [SPF45_HUMAN]                                               | 10.47 | 1 | 4 | 5 | 28 | 1.017 | 1.292 | 1.084 | 1.190 | 58.98 | 10.47 | 8 | 28 | 401  | 44.9  | 5.97 |
| Q7Z5N4 | Protein sidekick-1<br>OS=Homo sapiens<br>GN=SDK1<br>PE=1 SV=3 - [SDK1_HUMAN]                                                 | 3.21  | 1 | 4 | 4 | 10 | 1.286 | 0.720 | 0.511 | 1.191 | 28.70 | 3.21  | 5 | 10 | 2213 | 242.0 | 6.39 |

|        |                                                                                                                  |       |   |    |    |    |       |       |       |       |        |       |    |    |     |      |      |
|--------|------------------------------------------------------------------------------------------------------------------|-------|---|----|----|----|-------|-------|-------|-------|--------|-------|----|----|-----|------|------|
| P46087 | Probable 28S rRNA (cytosine(4447)-C(5)-methyltransferase OS=Homo sapiens GN=NOP2 PE=1 SV=2 - [NOP2_HUMAN]        | 23.89 | 1 | 17 | 17 | 44 | 0.853 | 0.961 | 0.911 | 1.191 | 105.35 | 23.89 | 24 | 44 | 812 | 89.2 | 9.23 |
| O95834 | Echinoderm microtubule-associated protein-like 2 OS=Homo sapiens GN=EML2 PE=1 SV=1 - [EMAL2_HUMAN]               | 16.02 | 1 | 10 | 10 | 50 | 1.620 | 0.728 | 0.822 | 1.191 | 109.65 | 16.02 | 17 | 50 | 649 | 70.6 | 6.32 |
| O75964 | ATP synthase subunit g, mitochondrial OS=Homo sapiens GN=ATP5L PE=1 SV=3 - [ATP5L_HUMAN]                         | 51.46 | 2 | 5  | 6  | 20 | 1.049 | 0.943 | 0.698 | 1.191 | 51.04  | 51.46 | 9  | 20 | 103 | 11.4 | 9.64 |
| Q7Z6B0 | Coiled-coil domain-containing protein 91 OS=Homo sapiens GN=CCDC91 PE=1 SV=2 - [CCD91_HUMAN]                     | 11.56 | 1 | 6  | 7  | 18 | 1.056 | 1.493 | 1.291 | 1.192 | 37.26  | 11.56 | 9  | 18 | 441 | 49.9 | 5.07 |
| Q14694 | Ubiquitin carboxyl-terminal hydrolase 10 OS=Homo sapiens GN=USP10 PE=1 SV=2 - [UBP10_HUMAN]                      | 14.04 | 1 | 11 | 11 | 31 | 1.148 | 1.120 | 1.015 | 1.192 | 63.38  | 14.04 | 17 | 31 | 798 | 87.1 | 5.31 |
| Q9P2K6 | Kelch-like protein 42 OS=Homo sapiens GN=KLHL42 PE=1 SV=2 - [KLH42_HUMAN]                                        | 2.97  | 1 | 2  | 2  | 3  | 1.204 | 1.329 | 1.093 | 1.192 | 6.12   | 2.97  | 2  | 3  | 505 | 56.8 | 5.74 |
| Q8TB52 | F-box only protein 30 OS=Homo sapiens GN=FBXO30 PE=1 SV=3 - [FBX30_HUMAN]                                        | 3.09  | 1 | 3  | 3  | 5  | 1.006 | 1.250 | 1.073 | 1.192 | 8.75   | 3.09  | 4  | 5  | 745 | 82.3 | 5.40 |
| O76071 | Probable cytosolic iron-sulfur protein assembly protein CIAO1 OS=Homo sapiens GN=CIAO1 PE=1 SV=1 - [CIAO1_HUMAN] | 5.31  | 1 | 2  | 2  | 2  | 1.293 | 0.914 | 0.919 | 1.192 | 4.19   | 5.31  | 2  | 2  | 339 | 37.8 | 4.97 |

|        |                                                                                                                      |       |   |    |    |      |       |       |       |       |         |       |    |      |      |       |       |
|--------|----------------------------------------------------------------------------------------------------------------------|-------|---|----|----|------|-------|-------|-------|-------|---------|-------|----|------|------|-------|-------|
| Q4U2R6 | 39S ribosomal protein L51, mitochondrial<br>OS=Homo sapiens<br>GN=MRPL51<br>PE=1 SV=1 - [RMS1_HUMAN]                 | 28.13 | 1 | 4  | 4  | 9    | 0.914 | 1.316 | 1.024 | 1.192 | 17.85   | 28.13 | 6  | 9    | 128  | 15.1  | 11.27 |
| A1X283 | SH3 and PX domain-containing protein 2B<br>OS=Homo sapiens<br>GN=SH3PXD2B<br>PE=1 SV=3 - [SPD2B_HUMAN]               | 22.39 | 1 | 20 | 21 | 75   | 1.242 | 1.380 | 1.245 | 1.192 | 158.87  | 22.39 | 34 | 75   | 911  | 101.5 | 8.69  |
| Q99685 | Monoglyceride lipase<br>OS=Homo sapiens<br>GN=MGLL PE=1 SV=2 - [MGLL_HUMAN]                                          | 22.11 | 1 | 6  | 6  | 21   | 1.479 | 1.636 | 1.271 | 1.193 | 39.07   | 22.11 | 9  | 21   | 303  | 33.2  | 6.99  |
| P07900 | Heat shock protein HSP 90-alpha<br>OS=Homo sapiens<br>GN=HSP90AA1<br>PE=1 SV=5 - [HS90A_HUMAN]                       | 59.15 | 4 | 32 | 55 | 1078 | 0.969 | 1.113 | 1.087 | 1.193 | 2744.65 | 59.15 | 87 | 1078 | 732  | 84.6  | 5.02  |
| Q9UNX4 | WD repeat-containing protein 3<br>OS=Homo sapiens<br>GN=WDR3<br>PE=1 SV=1 - [WDR3_HUMAN]                             | 4.98  | 1 | 4  | 4  | 6    | 0.836 | 0.959 | 0.831 | 1.193 | 8.20    | 4.98  | 5  | 6    | 943  | 106.0 | 6.64  |
| Q14978 | Nucleolar and coiled-body phosphoprotein 1<br>OS=Homo sapiens<br>GN=NOLC1<br>PE=1 SV=2 - [NOLC1_HUMAN]               | 21.46 | 1 | 19 | 19 | 64   | 0.908 | 1.045 | 0.857 | 1.193 | 87.36   | 21.46 | 31 | 64   | 699  | 73.6  | 9.47  |
| O43166 | Signal-induced proliferation-associated 1-like protein 1<br>OS=Homo sapiens<br>GN=SI1L1<br>PE=1 SV=4 - [SI1L1_HUMAN] | 4.82  | 1 | 7  | 7  | 18   | 0.934 | 0.806 | 0.876 | 1.193 | 51.45   | 4.82  | 13 | 18   | 1804 | 199.9 | 8.19  |
| Q15007 | Pre-mRNA-splicing regulator WTAP<br>OS=Homo sapiens<br>GN=WTAP<br>PE=1 SV=2 - [FL2D_HUMAN]                           | 3.79  | 1 | 2  | 2  | 2    | 0.963 | 1.360 | 1.345 | 1.194 | 4.86    | 3.79  | 2  | 2    | 396  | 44.2  | 5.19  |

|        |                                                                                                                       |       |   |    |    |    |       |       |       |       |        |       |    |    |      |       |      |
|--------|-----------------------------------------------------------------------------------------------------------------------|-------|---|----|----|----|-------|-------|-------|-------|--------|-------|----|----|------|-------|------|
| Q9BX66 | Sorbin and SH3 domain-containing protein 1<br>OS=Homo sapiens<br>GN=SORBS1<br>PE=1 SV=3 - [SRBS1_HUMAN]               | 15.25 | 1 | 14 | 15 | 27 | 1.098 | 4.941 | 0.935 | 1.194 | 75.41  | 15.25 | 22 | 27 | 1292 | 142.4 | 6.84 |
| Q9BZ29 | Dedicator of cytokinesis protein 9<br>OS=Homo sapiens<br>GN=DOCK9<br>PE=1 SV=2 - [DOCK9_HUMAN]                        | 1.26  | 1 | 3  | 3  | 5  | 1.051 | 0.932 | 0.919 | 1.194 | 4.36   | 1.26  | 3  | 5  | 2069 | 236.3 | 7.49 |
| O60869 | Endothelial differentiation-related factor 1<br>OS=Homo sapiens<br>GN=EDF1<br>PE=1 SV=1 - [EDF1_HUMAN]                | 39.86 | 1 | 7  | 7  | 41 | 1.046 | 1.129 | 1.082 | 1.194 | 75.18  | 39.86 | 12 | 41 | 148  | 16.4  | 9.95 |
| Q96JN8 | Neuralized-like protein 4<br>OS=Homo sapiens<br>GN=NEURL4<br>PE=1 SV=2 - [NEUL4_HUMAN]                                | 0.96  | 1 | 2  | 2  | 3  | 0.791 | 0.220 | 0.406 | 1.194 | 4.29   | 0.96  | 2  | 3  | 1562 | 166.8 | 5.86 |
| Q9HAU0 | Pleckstrin homology domain-containing family A member 5<br>OS=Homo sapiens<br>GN=PLEKHA5<br>PE=1 SV=1 - [PKHA5_HUMAN] | 25.36 | 1 | 20 | 21 | 75 | 1.641 | 1.409 | 0.868 | 1.194 | 185.01 | 25.36 | 33 | 75 | 1116 | 127.4 | 7.53 |
| P52815 | 39S ribosomal protein L12, mitochondrial<br>OS=Homo sapiens<br>GN=MRPL12<br>PE=1 SV=2 - [RM12_HUMAN]                  | 23.74 | 1 | 6  | 6  | 27 | 1.183 | 1.255 | 1.113 | 1.195 | 48.22  | 23.74 | 11 | 27 | 198  | 21.3  | 8.87 |
| O00472 | RNA polymerase II elongation factor ELL2<br>OS=Homo sapiens<br>GN=ELL2 PE=1 SV=2 - [ELL2_HUMAN]                       | 2.03  | 1 | 1  | 1  | 9  | 0.765 | 0.479 | 0.577 | 1.195 | 11.92  | 2.03  | 1  | 9  | 640  | 72.3  | 9.00 |
| Q29RF7 | Sister chromatid cohesion protein PDS5 homolog A<br>OS=Homo sapiens<br>GN=PDS5A<br>PE=1 SV=1 - [PDS5A_HUMAN]          | 8.30  | 1 | 10 | 11 | 15 | 1.141 | 1.233 | 1.136 | 1.195 | 29.09  | 8.30  | 12 | 15 | 1337 | 150.7 | 7.91 |

|        |                                                                                                                  |       |   |    |    |    |       |       |       |       |        |       |    |    |     |       |      |
|--------|------------------------------------------------------------------------------------------------------------------|-------|---|----|----|----|-------|-------|-------|-------|--------|-------|----|----|-----|-------|------|
| Q9BXJ1 | Complement C1q tumor necrosis factor-related protein 1 OS=Homo sapiens<br>GN=C1QTNF1<br>PE=1 SV=1 - [C1Q1_HUMAN] | 4.63  | 1 | 1  | 1  | 3  | 0.802 | 1.292 | 0.445 | 1.195 | 12.05  | 4.63  | 2  | 3  | 281 | 31.7  | 6.90 |
| Q9NX40 | OCIA domain-containing protein 1 OS=Homo sapiens<br>GN=OCIAD1<br>PE=1 SV=1 - [OCAD1_HUMAN]                       | 42.04 | 1 | 12 | 12 | 39 | 1.305 | 1.029 | 0.823 | 1.195 | 104.14 | 42.04 | 18 | 39 | 245 | 27.6  | 7.49 |
| O75264 | Small integral membrane protein 24 OS=Homo sapiens<br>GN=SMIM24<br>PE=2 SV=2 - [SIM24_HUMAN]                     | 10.00 | 1 | 1  | 1  | 2  | 1.393 | 0.960 | 1.263 | 1.195 | 4.51   | 10.00 | 1  | 2  | 130 | 15.0  | 5.29 |
| P32418 | Sodium/calcium exchanger 1 OS=Homo sapiens<br>GN=SLC8A1<br>PE=1 SV=3 - [NAC1_HUMAN]                              | 5.96  | 1 | 4  | 4  | 16 | 0.845 | 0.774 | 0.628 | 1.196 | 28.49  | 5.96  | 8  | 16 | 973 | 108.5 | 5.00 |
| Q14149 | MORC family CW-type zinc finger protein 3 OS=Homo sapiens<br>GN=MORC3<br>PE=1 SV=3 - [MORC3_HUMAN]               | 2.66  | 1 | 2  | 2  | 2  | 1.585 | 0.794 | 1.076 | 1.196 | 4.70   | 2.66  | 2  | 2  | 939 | 107.0 | 5.60 |
| Q96CB8 | Integrator complex subunit 12 OS=Homo sapiens<br>GN=INTS12<br>PE=1 SV=1 - [INT12_HUMAN]                          | 10.17 | 1 | 3  | 4  | 7  | 1.262 | 1.548 | 1.185 | 1.196 | 12.94  | 10.17 | 6  | 7  | 462 | 48.8  | 9.69 |
| P43378 | Tyrosine-protein phosphatase non-receptor type 9 OS=Homo sapiens<br>GN=PTPN9<br>PE=1 SV=1 - [PTN9_HUMAN]         | 7.25  | 1 | 4  | 4  | 13 | 1.346 | 0.988 | 0.882 | 1.196 | 33.91  | 7.25  | 8  | 13 | 593 | 68.0  | 8.02 |
| Q9ULC6 | Protein-arginine deiminase type-1 OS=Homo sapiens<br>GN=PADI1<br>PE=1 SV=2 - [PADI1_HUMAN]                       | 3.47  | 1 | 1  | 1  | 1  | 2.478 | 2.479 | 1.630 | 1.196 | 2.90   | 3.47  | 1  | 1  | 663 | 74.6  | 6.49 |



|        |                                                                                                            |       |   |    |    |     |       |       |       |       |        |       |    |     |      |       |      |
|--------|------------------------------------------------------------------------------------------------------------|-------|---|----|----|-----|-------|-------|-------|-------|--------|-------|----|-----|------|-------|------|
| Q00839 | Heterogeneous nuclear ribonucleoprotein U<br>OS=Homo sapiens<br>GN=HNRNPU<br>PE=1 SV=6 - [HNRNPU_HUMAN]    | 34.55 | 1 | 34 | 34 | 321 | 1.157 | 1.212 | 0.922 | 1.196 | 817.39 | 34.55 | 44 | 321 | 825  | 90.5  | 6.00 |
| Q99608 | Necdin<br>OS=Homo sapiens<br>GN=NDN PE=2<br>SV=1 - [NECD_HUMAN]                                            | 3.12  | 1 | 1  | 1  | 4   | 0.395 | 0.485 | 0.364 | 1.196 | 7.60   | 3.12  | 2  | 4   | 321  | 36.1  | 8.78 |
| Q8IVB4 | Sodium/hydrogen exchanger 9<br>OS=Homo sapiens<br>GN=SLC9A9<br>PE=1 SV=1 - [SL9A9_HUMAN]                   | 6.51  | 1 | 2  | 2  | 5   | 1.462 | 1.228 | 0.828 | 1.197 | 13.00  | 6.51  | 3  | 5   | 645  | 72.5  | 6.21 |
| Q5JTD0 | Tight junction-associated protein 1<br>OS=Homo sapiens<br>GN=TJAP1<br>PE=1 SV=1 - [TJAP1_HUMAN]            | 10.77 | 1 | 5  | 6  | 10  | 0.918 | 1.134 | 1.123 | 1.197 | 15.53  | 10.77 | 8  | 10  | 557  | 61.8  | 5.97 |
| P09016 | Homeobox protein Hox-D4<br>OS=Homo sapiens<br>GN=HOXD4<br>PE=2 SV=3 - [HXD4_HUMAN]                         | 6.27  | 1 | 1  | 1  | 3   | 3.275 | 1.518 | 1.257 | 1.197 | 0.00   | 6.27  | 1  | 3   | 255  | 27.9  | 9.39 |
| Q8NDW8 | Tetrapeptide repeat protein 21A<br>OS=Homo sapiens<br>GN=TTC21A<br>PE=2 SV=3 - [TT21A_HUMAN]               | 1.67  | 1 | 1  | 2  | 3   | 1.074 | 0.653 | 1.192 | 1.197 | 1.85   | 1.67  | 2  | 3   | 1320 | 150.8 | 7.24 |
| Q9NZR1 | Tropomodulin-2<br>OS=Homo sapiens<br>GN=TMOD2<br>PE=1 SV=1 - [TMOD2_HUMAN]                                 | 23.08 | 1 | 7  | 8  | 23  | 1.387 | 0.751 | 1.051 | 1.197 | 44.36  | 23.08 | 11 | 23  | 351  | 39.6  | 5.27 |
| Q86VM9 | Zinc finger CCCH domain-containing protein 18<br>OS=Homo sapiens<br>GN=ZC3H18<br>PE=1 SV=2 - [ZCH18_HUMAN] | 11.54 | 2 | 9  | 10 | 26  | 1.097 | 1.414 | 0.969 | 1.197 | 56.91  | 11.54 | 16 | 26  | 953  | 106.3 | 8.32 |
| P51798 | H(+)/Cl(-) exchange transporter 7<br>OS=Homo sapiens<br>GN=CLCN7<br>PE=1 SV=2 - [CLCN7_HUMAN]              | 7.08  | 1 | 5  | 5  | 25  | 0.803 | 0.710 | 0.818 | 1.197 | 76.22  | 7.08  | 8  | 25  | 805  | 88.6  | 8.43 |

|        |                                                                                                                                                          |       |   |   |    |     |       |       |       |       |        |       |    |     |     |      |       |
|--------|----------------------------------------------------------------------------------------------------------------------------------------------------------|-------|---|---|----|-----|-------|-------|-------|-------|--------|-------|----|-----|-----|------|-------|
| Q9NZN8 | CCR4-NOT transcription complex subunit 2<br>OS=Homo sapiens<br>GN=CNOT2<br>PE=1 SV=1 - [CNOT2_HUMAN]<br>Zinc finger and BTB domain-containing protein 43 | 9.63  | 1 | 4 | 4  | 11  | 0.715 | 0.917 | 1.056 | 1.197 | 31.48  | 9.63  | 6  | 11  | 540 | 59.7 | 7.66  |
| O43298 | OS=Homo sapiens<br>GN=ZBTB43<br>PE=1 SV=1 - [ZBT43_HUMAN]<br>Inactive N-acetylated-alpha-linked acidic dipeptidase-like protein 2                        | 3.21  | 1 | 1 | 1  | 1   | 1.344 | 1.182 | 1.077 | 1.198 | 0.00   | 3.21  | 1  | 1   | 467 | 52.6 | 5.76  |
| Q58DX5 | OS=Homo sapiens<br>GN=NAALADL2<br>PE=1 SV=3 - [NADL2_HUMAN]<br>Aldo-keto reductase family 1 member C3                                                    | 7.17  | 1 | 5 | 5  | 11  | 0.807 | 0.712 | 0.854 | 1.198 | 23.89  | 7.17  | 8  | 11  | 795 | 88.6 | 6.15  |
| P42330 | OS=Homo sapiens<br>GN=AKR1C3<br>PE=1 SV=4 - [AK1C3_HUMAN]<br>Small nuclear ribonucleoprotein-associated proteins B and B'                                | 50.46 | 3 | 5 | 16 | 154 | 0.843 | 0.682 | 0.971 | 1.198 | 326.02 | 50.46 | 24 | 154 | 323 | 36.8 | 7.94  |
| P14678 | OS=Homo sapiens<br>GN=SNRPB<br>PE=1 SV=2 - [RSMB_HUMAN]<br>Probable C-mannosyltransferase DPY19L3                                                        | 15.00 | 2 | 4 | 4  | 17  | 1.042 | 1.217 | 1.152 | 1.199 | 43.97  | 15.00 | 7  | 17  | 240 | 24.6 | 11.19 |
| Q6ZPD9 | OS=Homo sapiens<br>GN=DPY19L3<br>PE=2 SV=1 - [DI9L3_HUMAN]<br>Protein eva-1 homolog A                                                                    | 1.54  | 1 | 1 | 1  | 1   | 1.880 | 1.462 | 1.112 | 1.199 | 2.60   | 1.54  | 1  | 1   | 716 | 83.1 | 8.72  |
| Q9H8M9 | OS=Homo sapiens<br>GN=EVA1A<br>PE=2 SV=1 - [EVA1A_HUMAN]<br>Protein spire homolog 1                                                                      | 7.24  | 1 | 1 | 1  | 4   | 0.599 | 0.811 | 1.534 | 1.199 | 7.75   | 7.24  | 2  | 4   | 152 | 17.5 | 6.93  |
| Q08AE8 | OS=Homo sapiens<br>GN=SPIRE1<br>PE=1 SV=3 - [SPIR1_HUMAN]                                                                                                | 5.95  | 3 | 2 | 4  | 14  | 0.449 | 0.969 | 1.477 | 1.199 | 26.84  | 5.95  | 5  | 14  | 756 | 85.5 | 8.62  |

|        |                                                                                                                                              |       |   |    |    |    |       |       |       |       |        |       |    |    |      |       |      |
|--------|----------------------------------------------------------------------------------------------------------------------------------------------|-------|---|----|----|----|-------|-------|-------|-------|--------|-------|----|----|------|-------|------|
| Q9Y3E2 | BoIA-like protein 1<br>OS=Homo sapiens<br>GN=BOLA1<br>PE=1 SV=1 - [BOLA1_HUMAN]                                                              | 16.06 | 1 | 2  | 2  | 6  | 1.122 | 1.436 | 1.284 | 1.199 | 13.53  | 16.06 | 3  | 6  | 137  | 14.3  | 7.96 |
| Q5T6F2 | Ubiquitin-associated protein 2<br>OS=Homo sapiens<br>GN=UBAP2<br>PE=1 SV=1 - [UBAP2_HUMAN]                                                   | 10.01 | 1 | 9  | 10 | 23 | 0.960 | 1.144 | 1.047 | 1.200 | 49.46  | 10.01 | 15 | 23 | 1119 | 117.0 | 7.34 |
| P61587 | Rho-related GTP-binding protein RhoE<br>OS=Homo sapiens<br>GN=RND3<br>PE=1 SV=1 - [RND3_HUMAN]                                               | 32.38 | 1 | 7  | 7  | 20 | 1.067 | 0.314 | 0.508 | 1.200 | 54.59  | 32.38 | 12 | 20 | 244  | 27.4  | 8.48 |
| Q9Y5W7 | Sorting nexin-14<br>OS=Homo sapiens<br>GN=SNX14<br>PE=1 SV=3 - [SNX14_HUMAN]                                                                 | 0.95  | 1 | 1  | 1  | 1  | 1.403 | 1.391 | 1.007 | 1.200 | 0.00   | 0.95  | 1  | 1  | 946  | 110.1 | 6.70 |
| Q9NQ50 | 39S ribosomal protein L40, mitochondrial<br>OS=Homo sapiens<br>GN=MRPL40<br>PE=1 SV=1 - [RM40_HUMAN]                                         | 15.05 | 1 | 3  | 3  | 13 | 0.972 | 1.334 | 0.970 | 1.200 | 33.67  | 15.05 | 6  | 13 | 206  | 24.5  | 9.63 |
| Q9UHD2 | Serine/threonine-protein kinase TBK1<br>OS=Homo sapiens<br>GN=TBK1<br>PE=1 SV=1 - [TBK1_HUMAN]                                               | 24.55 | 1 | 14 | 15 | 44 | 1.061 | 1.010 | 0.879 | 1.200 | 110.77 | 24.55 | 24 | 44 | 729  | 83.6  | 6.79 |
| A6NKD9 | Coiled-coil domain-containing protein 85C<br>OS=Homo sapiens<br>GN=CCDC85C<br>PE=1 SV=1 - [CC85C_HUMAN]                                      | 5.25  | 1 | 2  | 2  | 6  | 1.341 | 1.849 | 1.033 | 1.200 | 13.52  | 5.25  | 4  | 6  | 419  | 45.2  | 6.96 |
| A6NHR9 | Structural maintenance of chromosomes flexible hinge domain-containing protein 1<br>OS=Homo sapiens<br>GN=SMCHD1<br>PE=1 SV=2 - [SMHD1_HUMA] | 12.57 | 1 | 22 | 23 | 42 | 1.188 | 1.253 | 1.009 | 1.200 | 83.82  | 12.57 | 31 | 42 | 2005 | 226.2 | 7.30 |

|        |                                                                                                                |       |   |    |    |     |       |       |       |       |        |       |    |     |      |       |       |
|--------|----------------------------------------------------------------------------------------------------------------|-------|---|----|----|-----|-------|-------|-------|-------|--------|-------|----|-----|------|-------|-------|
| Q9H2P0 | Activity-dependent neuroprotector homeobox protein<br>OS=Homo sapiens<br>GN=ADNP<br>PE=1 SV=1 - [ADNP_HUMAN]   | 9.80  | 1 | 10 | 10 | 25  | 1.110 | 1.387 | 1.260 | 1.200 | 44.60  | 9.80  | 14 | 25  | 1102 | 123.5 | 7.34  |
| Q86V81 | THO complex subunit 4<br>OS=Homo sapiens<br>GN=ALYREF<br>PE=1 SV=3 - [THOC4_HUMAN]                             | 47.86 | 1 | 8  | 8  | 31  | 1.250 | 1.823 | 0.955 | 1.201 | 108.87 | 47.86 | 11 | 31  | 257  | 26.9  | 11.15 |
| Q04656 | Copper-transporting ATPase 1<br>OS=Homo sapiens<br>GN=ATP7A<br>PE=1 SV=3 - [ATP7A_HUMAN]                       | 4.13  | 3 | 6  | 7  | 15  | 1.359 | 1.139 | 1.077 | 1.201 | 23.61  | 4.13  | 11 | 15  | 1500 | 163.3 | 6.24  |
| Q13435 | Splicing factor 3B subunit 2<br>OS=Homo sapiens<br>GN=SF3B2<br>PE=1 SV=2 - [SF3B2_HUMAN]                       | 37.21 | 1 | 28 | 29 | 142 | 1.082 | 1.363 | 1.115 | 1.201 | 316.96 | 37.21 | 49 | 142 | 895  | 100.2 | 5.67  |
| Q92736 | Ryanodine receptor 2<br>OS=Homo sapiens<br>GN=RYP2<br>PE=1 SV=3 - [RYP2_HUMAN]                                 | 1.91  | 1 | 5  | 7  | 9   | 0.641 | 1.059 | 0.791 | 1.201 | 15.52  | 1.91  | 7  | 9   | 4967 | 564.2 | 6.07  |
| Q96C86 | m7GpppX diphosphatase<br>OS=Homo sapiens<br>GN=DCPS<br>PE=1 SV=2 - [DCPS_HUMAN]                                | 32.64 | 1 | 7  | 7  | 18  | 1.460 | 0.994 | 0.885 | 1.201 | 47.42  | 32.64 | 10 | 18  | 337  | 38.6  | 6.38  |
| Q81WZ3 | Ankyrin repeat and KH domain-containing protein 1<br>OS=Homo sapiens<br>GN=ANKHD1<br>PE=1 SV=1 - [ANKH1_HUMAN] | 3.70  | 1 | 4  | 8  | 13  | 0.849 | 0.738 | 0.783 | 1.201 | 40.48  | 3.70  | 10 | 13  | 2542 | 269.3 | 5.73  |
| P14866 | Heterogeneous nuclear ribonucleoprotein L<br>OS=Homo sapiens<br>GN=HNRNPL<br>PE=1 SV=2 - [HNRNPL_HUMAN]        | 31.24 | 1 | 13 | 14 | 117 | 1.190 | 1.290 | 1.044 | 1.201 | 305.99 | 31.24 | 25 | 117 | 589  | 64.1  | 8.22  |
| Q9UBE0 | SUMO-activating enzyme subunit 1<br>OS=Homo sapiens<br>GN=SAE1<br>PE=1 SV=1 - [SAE1_HUMAN]                     | 39.88 | 1 | 13 | 13 | 56  | 1.012 | 0.941 | 0.856 | 1.202 | 155.31 | 39.88 | 19 | 56  | 346  | 38.4  | 5.30  |

|        |                                                                                                        |       |   |    |    |     |       |       |       |       |        |       |    |     |      |       |      |
|--------|--------------------------------------------------------------------------------------------------------|-------|---|----|----|-----|-------|-------|-------|-------|--------|-------|----|-----|------|-------|------|
| Q9UBU9 | Nuclear RNA export factor 1<br>OS=Homo sapiens<br>GN=NXF1<br>PE=1 SV=1 - [NXF1_HUMAN]                  | 5.98  | 1 | 3  | 4  | 7   | 1.355 | 1.068 | 0.978 | 1.202 | 8.32   | 5.98  | 6  | 7   | 619  | 70.1  | 8.51 |
| Q9BZE4 | Nucleolar GTP-binding protein 1<br>OS=Homo sapiens<br>GN=GTPBP4<br>PE=1 SV=3 - [NOG1_HUMAN]            | 19.09 | 1 | 12 | 12 | 27  | 0.832 | 0.823 | 0.698 | 1.202 | 62.03  | 19.09 | 17 | 27  | 634  | 73.9  | 9.50 |
| Q8ND24 | RING finger protein 214<br>OS=Homo sapiens<br>GN=RNF214<br>PE=1 SV=2 - [RN214_HUMAN]                   | 18.21 | 2 | 11 | 12 | 80  | 1.219 | 1.033 | 0.936 | 1.202 | 179.55 | 18.21 | 18 | 80  | 703  | 77.6  | 6.95 |
| Q14166 | Tubulin--tyrosine ligase-like protein 12<br>OS=Homo sapiens<br>GN=TTLL12<br>PE=1 SV=2 - [TTLL12_HUMAN] | 28.26 | 1 | 12 | 12 | 41  | 1.126 | 0.815 | 0.771 | 1.202 | 102.31 | 28.26 | 22 | 41  | 644  | 74.4  | 5.53 |
| P54259 | Atrophin-1<br>OS=Homo sapiens<br>GN=ATN1<br>PE=1 SV=3 - [ATN1_HUMAN]                                   | 2.10  | 1 | 3  | 3  | 5   | 1.245 | 1.282 | 1.152 | 1.202 | 4.70   | 2.10  | 4  | 5   | 1190 | 125.3 | 8.98 |
| Q16698 | 2,4-dienoyl-CoA reductase, mitochondrial<br>OS=Homo sapiens<br>GN=DECR1<br>PE=1 SV=1 - [DECR_HUMAN]    | 42.09 | 1 | 14 | 14 | 123 | 1.132 | 1.123 | 1.042 | 1.202 | 278.49 | 42.09 | 22 | 123 | 335  | 36.0  | 9.28 |
| P27707 | Deoxythymine kinase<br>OS=Homo sapiens<br>GN=DCK PE=1 SV=1 - [DCK_HUMAN]                               | 14.62 | 1 | 3  | 3  | 4   | 1.446 | 1.022 | 1.070 | 1.202 | 12.47  | 14.62 | 4  | 4   | 260  | 30.5  | 5.21 |
| Q9UEE9 | Craniofacial development protein 1<br>OS=Homo sapiens<br>GN=CFDP1<br>PE=1 SV=1 - [CFDP1_HUMAN]         | 17.73 | 1 | 4  | 4  | 12  | 0.916 | 1.325 | 0.984 | 1.202 | 30.32  | 17.73 | 5  | 12  | 299  | 33.6  | 4.81 |
| Q9Y2Q9 | 28S ribosomal protein S28, mitochondrial<br>OS=Homo sapiens<br>GN=MRPS28<br>PE=1 SV=1 - [RT28_HUMAN]   | 9.09  | 1 | 2  | 2  | 5   | 1.102 | 1.247 | 0.956 | 1.202 | 14.36  | 9.09  | 3  | 5   | 187  | 20.8  | 9.10 |

|        |                                                                                                                                  |       |   |    |    |    |       |       |       |       |       |       |    |    |      |       |      |
|--------|----------------------------------------------------------------------------------------------------------------------------------|-------|---|----|----|----|-------|-------|-------|-------|-------|-------|----|----|------|-------|------|
| P18583 | Protein SON<br>OS=Homo sapiens<br>GN=SON PE=1 SV=4 - [SON_HUMAN]                                                                 | 9.48  | 1 | 17 | 17 | 36 | 1.170 | 1.101 | 1.073 | 1.202 | 70.67 | 9.48  | 26 | 36 | 2426 | 263.7 | 5.64 |
| Q8N9V3 | WD repeat, SAM and U-box domain-containing protein 1<br>OS=Homo sapiens<br>GN=WDSUB1 PE=1 SV=3 - [WSDU1_HUMAN]                   | 3.15  | 1 | 1  | 1  | 1  | 2.015 | 3.096 | 1.867 | 1.203 | 2.71  | 3.15  | 1  | 1  | 476  | 52.8  | 6.37 |
| Q8N1G1 | RNA exonuclease 1 homolog<br>OS=Homo sapiens<br>GN=REXO1 PE=1 SV=3 - [REXO1_HUMAN]                                               | 0.82  | 1 | 1  | 1  | 1  | 0.627 | 0.993 | 0.740 | 1.203 | 3.15  | 0.82  | 1  | 1  | 1221 | 131.4 | 8.95 |
| Q9Y614 | Actin-like protein 7B<br>OS=Homo sapiens<br>GN=ACTL7B PE=2 SV=1 - [ACL7B_HUMAN]                                                  | 1.93  | 1 | 1  | 1  | 1  | 0.649 | 1.098 | 1.392 | 1.203 | 2.12  | 1.93  | 1  | 1  | 415  | 45.2  | 5.49 |
| Q96P50 | Arf-GAP with coiled-coil, ANK repeat and PH domain-containing protein 3<br>OS=Homo sapiens<br>GN=ACAP3 PE=1 SV=2 - [ACAP3_HUMAN] | 1.20  | 1 | 1  | 1  | 2  | 0.822 | 0.916 | 0.827 | 1.203 | 6.79  | 1.20  | 2  | 2  | 834  | 92.4  | 5.99 |
| O95396 | Adenylyltransferase and sulfurtransferase MOCS3<br>OS=Homo sapiens<br>GN=MOCS3 PE=1 SV=1 - [MOCS3_HUMAN]                         | 8.70  | 1 | 4  | 4  | 9  | 1.156 | 1.087 | 1.260 | 1.203 | 12.51 | 8.70  | 7  | 9  | 460  | 49.6  | 6.21 |
| Q6ZS38 | Uncharacterized protein C1orf122<br>OS=Homo sapiens<br>GN=C1orf122 PE=2 SV=2 - [CA122_HUMAN]                                     | 22.73 | 1 | 2  | 2  | 4  | 0.757 | 0.881 | 1.166 | 1.203 | 7.78  | 22.73 | 4  | 4  | 110  | 11.5  | 6.73 |
| Q9BXV9 | Uncharacterized protein C14orf142<br>OS=Homo sapiens<br>GN=C14orf142 PE=1 SV=2 - [CN142_HUMAN]                                   | 27.00 | 1 | 2  | 2  | 7  | 0.921 | 0.983 | 1.112 | 1.203 | 21.96 | 27.00 | 4  | 7  | 100  | 10.9  | 4.27 |

|        |                                                                                                                  |       |   |    |    |    |       |       |       |       |        |       |    |    |      |       |      |
|--------|------------------------------------------------------------------------------------------------------------------|-------|---|----|----|----|-------|-------|-------|-------|--------|-------|----|----|------|-------|------|
| 000204 | Sulfotransferase family<br>cytosolic 2B member 1<br>OS=Homo sapiens<br>GN=SULT2B1<br>PE=1 SV=2 - [SULT2B1_HUMAN] | 1.64  | 1 | 1  | 1  | 2  | 1.434 | 0.959 | 0.748 | 1.203 | 3.90   | 1.64  | 1  | 2  | 365  | 41.3  | 5.40 |
| Q02127 | Dihydroorotate dehydrogenase (quinone), mitochondrial<br>OS=Homo sapiens<br>GN=DHODH<br>PE=1 SV=3 - [PYRD_HUMAN] | 13.42 | 1 | 4  | 4  | 5  | 0.914 | 0.995 | 0.891 | 1.203 | 16.90  | 13.42 | 5  | 5  | 395  | 42.8  | 9.67 |
| Q9NIW7 | ATPase family AAA domain-containing protein 3A<br>OS=Homo sapiens<br>GN=ATAD3A<br>PE=1 SV=2 - [ATD3A_HUMAN]      | 44.48 | 2 | 9  | 25 | 99 | 1.071 | 0.962 | 0.938 | 1.204 | 270.36 | 44.48 | 38 | 99 | 634  | 71.3  | 8.98 |
| Q16666 | Gamma-interferon-inducible protein 16<br>OS=Homo sapiens<br>GN=IFI16<br>PE=1 SV=3 - [IFI16_HUMAN]                | 34.39 | 1 | 19 | 23 | 69 | 0.953 | 0.899 | 0.729 | 1.204 | 197.67 | 34.39 | 35 | 69 | 785  | 88.2  | 9.28 |
| O60879 | Protein diaphanous homolog 2<br>OS=Homo sapiens<br>GN=DIAPH2<br>PE=1 SV=1 - [DIAP2_HUMAN]                        | 17.35 | 1 | 19 | 20 | 53 | 1.088 | 1.302 | 1.330 | 1.204 | 121.65 | 17.35 | 31 | 53 | 1101 | 125.5 | 6.58 |
| Q8TBY8 | Polyamine-modulated factor 1-binding protein 1<br>OS=Homo sapiens<br>GN=PMFBP1<br>PE=2 SV=1 - [PMFBP_HUMAN]      | 4.89  | 1 | 3  | 4  | 6  | 1.173 | 1.035 | 0.955 | 1.204 | 8.83   | 4.89  | 4  | 6  | 1022 | 119.0 | 6.29 |
| Q9NZC7 | WW domain-containing oxidoreductase<br>OS=Homo sapiens<br>GN=WWOX<br>PE=1 SV=1 - [WWOX_HUMAN]                    | 3.62  | 1 | 1  | 1  | 3  | 1.705 | 0.947 | 1.060 | 1.205 | 7.46   | 3.62  | 2  | 3  | 414  | 46.6  | 7.17 |
| Q8N568 | Serine/threonine-protein kinase DCLK2<br>OS=Homo sapiens<br>GN=DCLK2<br>PE=2 SV=4 - [DCLK2_HUMAN]                | 1.70  | 1 | 1  | 1  | 1  | 0.805 | 1.143 | 2.020 | 1.205 | 3.77   | 1.70  | 1  | 1  | 766  | 83.6  | 8.34 |

|        |                                                                                                                                                                                                                                                                              |       |   |    |    |    |       |       |       |       |        |       |    |    |      |       |      |
|--------|------------------------------------------------------------------------------------------------------------------------------------------------------------------------------------------------------------------------------------------------------------------------------|-------|---|----|----|----|-------|-------|-------|-------|--------|-------|----|----|------|-------|------|
| Q9NRG7 | Epimerase<br>family protein<br>SDR39U1<br>OS=Homo<br>sapiens<br>GN=SDR39U1<br>PE=1 SV=2 -<br>[D39U1_HUMAN<br>]<br>Short transient<br>receptor<br>potential<br>channel 1                                                                                                      | 7.84  | 1 | 3  | 3  | 7  | 1.040 | 1.210 | 0.962 | 1.205 | 11.54  | 7.84  | 5  | 7  | 319  | 34.7  | 9.77 |
| P48995 | OS=Homo<br>sapiens<br>GN=TRPC1<br>PE=1 SV=1 -<br>[TRPC1_HUMAN<br>]<br>Espin-like<br>protein<br>OS=Homo<br>sapiens<br>GN=ESPNL<br>PE=2 SV=3 -<br>[ESPNL_HUMAN<br>]<br>Thioredoxin-like<br>protein AAED1<br>OS=Homo<br>sapiens<br>GN=AAED1<br>PE=2 SV=1 -<br>[AAED1_HUMAN<br>] | 3.03  | 1 | 1  | 2  | 4  |       | 1.628 | 1.676 | 1.205 | 5.80   | 3.03  | 3  | 4  | 793  | 91.2  | 8.05 |
| Q6ZVH7 | Chromobox<br>protein<br>homolog 8<br>OS=Homo<br>sapiens<br>GN=CBX8<br>PE=1 SV=3 -<br>[CBX8_HUMAN<br>]                                                                                                                                                                        | 5.97  | 1 | 2  | 3  | 6  | 1.053 | 0.779 | 0.932 | 1.205 | 9.48   | 5.97  | 4  | 6  | 1005 | 108.1 | 6.47 |
| Q7RTV5 | SUN domain-<br>containing<br>protein 2<br>OS=Homo<br>sapiens<br>GN=SUN2<br>PE=1 SV=3 -<br>[SUN2_HUMAN<br>]                                                                                                                                                                   | 6.64  | 1 | 1  | 1  | 1  | 0.498 | 0.745 | 1.237 | 1.205 | 4.86   | 6.64  | 1  | 1  | 226  | 24.8  | 8.91 |
| Q9HC52 | Stimulated by<br>retinoic acid<br>gene 6 protein<br>homolog<br>OS=Homo<br>sapiens<br>GN=STRA6<br>PE=1 SV=1 -<br>[STRA6_HUMAN<br>]                                                                                                                                            | 2.57  | 1 | 1  | 1  | 4  | 1.357 | 1.415 | 0.978 | 1.205 | 7.26   | 2.57  | 2  | 4  | 389  | 43.4  | 9.91 |
| Q9UH99 | Interleukin-17<br>receptor A<br>OS=Homo<br>sapiens<br>GN=IL17RA<br>PE=1 SV=2 -<br>[I17RA_HUMAN<br>]                                                                                                                                                                          | 28.03 | 1 | 14 | 15 | 35 | 1.371 | 1.847 | 1.261 | 1.206 | 119.03 | 28.03 | 22 | 35 | 717  | 80.3  | 6.73 |
| Q9BX79 | Angiotensin-<br>converting<br>enzyme<br>OS=Homo<br>sapiens<br>GN=ACE PE=1<br>SV=1 -<br>[ACE_HUMAN<br>]                                                                                                                                                                       | 2.85  | 1 | 1  | 1  | 1  | 1.427 | 1.096 | 1.587 | 1.206 | 2.04   | 2.85  | 1  | 1  | 667  | 73.5  | 8.98 |
| Q96F46 |                                                                                                                                                                                                                                                                              | 2.31  | 1 | 2  | 2  | 5  | 1.037 | 1.440 | 1.235 | 1.206 | 15.19  | 2.31  | 3  | 5  | 866  | 96.1  | 5.21 |
| P12821 |                                                                                                                                                                                                                                                                              | 4.52  | 2 | 5  | 6  | 18 | 1.573 | 0.764 | 0.342 | 1.206 | 30.55  | 4.52  | 8  | 18 | 1306 | 149.6 | 6.39 |



|        |                                                                                                                 |       |   |    |    |     |       |       |       |       |        |       |    |     |      |       |      |
|--------|-----------------------------------------------------------------------------------------------------------------|-------|---|----|----|-----|-------|-------|-------|-------|--------|-------|----|-----|------|-------|------|
| Q71RC2 | La-related protein 4<br>OS=Homo sapiens<br>GN=LARP4<br>PE=1 SV=3 - [LARP4_HUMAN]                                | 14.36 | 1 | 8  | 8  | 16  | 0.796 | 0.689 | 0.925 | 1.206 | 36.47  | 14.36 | 10 | 16  | 724  | 80.5  | 6.61 |
| P35232 | Prohibitin<br>OS=Homo sapiens<br>GN=PHB PE=1 SV=1 - [PHB_HUMAN]                                                 | 47.43 | 1 | 15 | 15 | 129 | 1.105 | 1.133 | 0.880 | 1.207 | 287.74 | 47.43 | 28 | 129 | 272  | 29.8  | 5.76 |
| Q86X95 | Corepressor interacting with RBP1 1<br>OS=Homo sapiens<br>GN=CIR1 PE=1 SV=1 - [CIR1_HUMAN]                      | 2.00  | 1 | 1  | 1  | 1   | 0.885 | 0.910 | 1.174 | 1.207 | 0.00   | 2.00  | 1  | 1   | 450  | 52.3  | 9.86 |
| P48634 | Protein PRRC2A<br>OS=Homo sapiens<br>GN=PRRC2A<br>PE=1 SV=3 - [PRC2A_HUMAN]                                     | 15.30 | 1 | 22 | 26 | 71  | 1.080 | 1.404 | 1.087 | 1.208 | 175.06 | 15.30 | 36 | 71  | 2157 | 228.7 | 9.45 |
| P42167 | Lamina-associated polypeptide 2, isoforms beta/gamma<br>OS=Homo sapiens<br>GN=TMPO<br>PE=1 SV=2 - [LAP2B_HUMAN] | 39.65 | 3 | 7  | 15 | 81  | 1.304 | 1.625 | 0.942 | 1.208 | 193.68 | 39.65 | 24 | 81  | 454  | 50.6  | 9.38 |
| P57679 | Ellis-van Creveld syndrome protein<br>OS=Homo sapiens<br>GN=EVC PE=1 SV=1 - [EVC_HUMAN]                         | 3.53  | 1 | 2  | 2  | 5   | 2.472 | 1.471 | 1.375 | 1.208 | 10.13  | 3.53  | 2  | 5   | 992  | 111.9 | 6.73 |
| Q9Y6M5 | Zinc transporter 1<br>OS=Homo sapiens<br>GN=SLC30A1<br>PE=1 SV=3 - [ZNT1_HUMAN]                                 | 10.45 | 1 | 5  | 5  | 8   | 1.179 | 0.842 | 0.767 | 1.208 | 22.49  | 10.45 | 8  | 8   | 507  | 55.3  | 6.48 |
| Q01581 | Hydroxymethylglutaryl-CoA synthase, cytoplasmic<br>OS=Homo sapiens<br>GN=HMGCS1<br>PE=1 SV=2 - [HMCS1_HUMAN]    | 4.04  | 1 | 2  | 2  | 4   | 1.244 | 0.554 | 1.265 | 1.208 | 9.88   | 4.04  | 3  | 4   | 520  | 57.3  | 5.41 |
| P09132 | Signal recognition particle 19 kDa protein<br>OS=Homo sapiens<br>GN=SRP19<br>PE=1 SV=3 - [SRP19_HUMAN]          | 20.14 | 1 | 3  | 3  | 16  | 0.775 | 0.795 | 1.010 | 1.208 | 47.21  | 20.14 | 5  | 16  | 144  | 16.1  | 9.85 |

|        |                                                                                                              |       |   |    |    |     |       |       |       |       |        |       |    |     |      |       |      |
|--------|--------------------------------------------------------------------------------------------------------------|-------|---|----|----|-----|-------|-------|-------|-------|--------|-------|----|-----|------|-------|------|
| Q9UIS9 | Methyl-CpG-binding domain protein 1<br>OS=Homo sapiens<br>GN=MBD1<br>PE=1 SV=2 - [MBD1_HUMAN]                | 7.60  | 1 | 2  | 2  | 2   | 0.921 | 1.509 | 1.345 | 1.208 | 3.27   | 7.60  | 2  | 2   | 605  | 66.6  | 9.04 |
| O60930 | Ribonuclease H1 OS=Homo sapiens<br>GN=RNASEH1<br>PE=1 SV=2 - [RNH1_HUMAN]                                    | 6.99  | 1 | 1  | 2  | 4   | 0.792 | 0.820 | 1.078 | 1.208 | 4.16   | 6.99  | 3  | 4   | 286  | 32.0  | 9.16 |
| Q9UHI6 | Probable ATP-dependent RNA helicase DDX20<br>OS=Homo sapiens<br>GN=DDX20<br>PE=1 SV=2 - [DDX20_HUMAN]        | 7.65  | 1 | 5  | 5  | 11  | 0.950 | 0.779 | 0.834 | 1.209 | 16.82  | 7.65  | 9  | 11  | 824  | 92.2  | 6.95 |
| Q6P4F2 | Adrenodoxin-like protein, mitochondrial<br>OS=Homo sapiens<br>GN=FDX1L<br>PE=1 SV=1 - [ADXL_HUMAN]           | 6.01  | 1 | 1  | 1  | 2   | 1.191 | 1.016 | 1.425 | 1.209 | 2.22   | 6.01  | 2  | 2   | 183  | 19.5  | 5.38 |
| P07099 | Epoxyde hydrolase 1<br>OS=Homo sapiens<br>GN=EPHX1<br>PE=1 SV=1 - [HYEP_HUMAN]                               | 40.44 | 1 | 21 | 21 | 149 | 1.282 | 0.439 | 0.533 | 1.209 | 480.06 | 40.44 | 36 | 149 | 455  | 52.9  | 7.25 |
| Q13546 | Receptor-interacting serine/threonine kinase 1<br>OS=Homo sapiens<br>GN=RIPK1<br>PE=1 SV=3 - [RIPK1_HUMAN]   | 9.54  | 1 | 5  | 5  | 12  | 1.134 | 1.073 | 1.191 | 1.210 | 23.77  | 9.54  | 7  | 12  | 671  | 75.9  | 6.33 |
| O14776 | Transcription elongation regulator 1<br>OS=Homo sapiens<br>GN=TCERG1<br>PE=1 SV=2 - [TCRGI_HUMAN]            | 20.58 | 2 | 26 | 27 | 68  | 1.189 | 1.204 | 0.931 | 1.210 | 142.65 | 20.58 | 42 | 68  | 1098 | 123.8 | 8.65 |
| Q8NBM4 | Ubiquitin-associated domain-containing protein 2<br>OS=Homo sapiens<br>GN=UBAC2<br>PE=2 SV=1 - [UBAC2_HUMAN] | 2.33  | 1 | 1  | 1  | 2   | 0.741 | 0.756 | 0.670 | 1.210 | 1.97   | 2.33  | 2  | 2   | 344  | 38.9  | 9.01 |
| O00151 | PDZ and LIM domain protein 1 OS=Homo sapiens<br>GN=PDLM1<br>PE=1 SV=4 - [PDLI1_HUMAN]                        | 73.56 | 1 | 20 | 21 | 351 | 2.426 | 0.730 | 1.352 | 1.210 | 928.27 | 73.56 | 36 | 351 | 329  | 36.0  | 7.02 |

|        |                                                                                                                                                                     |                                                                                                                    |       |    |    |     |       |       |       |       |        |        |       |     |     |      |      |      |
|--------|---------------------------------------------------------------------------------------------------------------------------------------------------------------------|--------------------------------------------------------------------------------------------------------------------|-------|----|----|-----|-------|-------|-------|-------|--------|--------|-------|-----|-----|------|------|------|
| O43172 | U4/U6 small<br>nuclear<br>ribonucleoprotein<br>Prp4                                                                                                                 | OS=Homo sapiens<br>GN=PRPF4<br>PE=1 SV=2 -<br>[PRP4_HUMAN]                                                         | 23.56 | 1  | 9  | 9   | 28    | 0.930 | 1.066 | 0.874 | 1.210  | 86.05  | 23.56 | 15  | 28  | 522  | 58.4 | 7.42 |
| Q1KMD3 | Heterogeneous<br>nuclear<br>ribonucleoprotein<br>U-like<br>protein 2                                                                                                | OS=Homo sapiens<br>GN=HNRNPUL2<br>PE=1 SV=1 -<br>[HNR12_HUMAN<br>Far upstream<br>element-<br>binding protein<br>2] | 40.03 | 1  | 31 | 31  | 95    | 1.403 | 1.501 | 1.141 | 1.210  | 236.57 | 40.03 | 46  | 95  | 747  | 85.1 | 4.91 |
| Q92945 | OS=Homo sapiens<br>GN=KHSRP<br>PE=1 SV=4 -<br>[FUBP2_HUMAN<br>]                                                                                                     | 46.13                                                                                                              | 1     | 24 | 28 | 143 | 1.160 | 1.301 | 1.167 | 1.210 | 360.80 | 46.13  | 45    | 143 | 711 | 73.1 | 7.30 |      |
| P20962 | Parathyrosin<br>OS=Homo sapiens<br>GN=PTMS<br>PE=1 SV=2 -<br>[PTMS_HUMAN]                                                                                           | 22.55                                                                                                              | 1     | 2  | 2  | 50  | 1.434 | 1.811 | 1.189 | 1.210 | 152.54 | 22.55  | 3     | 50  | 102 | 11.5 | 4.16 |      |
| Q6PI48 | Aspartate--<br>tRNA ligase,<br>mitochondrial<br>OS=Homo sapiens<br>GN=DARS2<br>PE=1 SV=1 -<br>[SYDM_HUMAN]                                                          | 11.32                                                                                                              | 1     | 7  | 8  | 17  | 0.982 | 1.722 | 1.073 | 1.211 | 34.90  | 11.32  | 11    | 17  | 645 | 73.5 | 8.02 |      |
| Q9ULX6 | A-kinase<br>anchor protein<br>8-like<br>OS=Homo sapiens<br>GN=AKAP8L<br>PE=1 SV=3 -<br>[AKP8L_HUMAN<br>]                                                            | 11.15                                                                                                              | 1     | 6  | 6  | 9   | 1.188 | 0.961 | 1.273 | 1.211 | 22.59  | 11.15  | 7     | 9   | 646 | 71.6 | 5.07 |      |
| P17480 | Nucleolar<br>transcription<br>factor 1<br>OS=Homo sapiens<br>GN=UBTF<br>PE=1 SV=1 -<br>[UBF1_HUMAN]                                                                 | 33.90                                                                                                              | 1     | 28 | 28 | 112 | 0.942 | 1.211 | 0.860 | 1.211 | 232.95 | 33.90  | 42    | 112 | 764 | 89.4 | 5.81 |      |
| P18859 | ATP synthase-<br>coupling factor<br>6,<br>mitochondrial<br>OS=Homo sapiens<br>GN=ATP5J<br>PE=1 SV=1 -<br>[ATP5J_HUMAN<br>E3 ubiquitin-<br>protein ligase<br>TRIM22] | 55.56                                                                                                              | 1     | 7  | 7  | 62  | 1.051 | 1.040 | 0.805 | 1.211 | 236.25 | 55.56  | 10    | 62  | 108 | 12.6 | 9.52 |      |
| Q8IYM9 | OS=Homo sapiens<br>GN=TRIM22<br>PE=1 SV=1 -<br>[TRI22_HUMAN<br>]                                                                                                    | 14.06                                                                                                              | 1     | 6  | 6  | 26  | 1.117 | 0.760 | 0.993 | 1.212 | 43.06  | 14.06  | 9     | 26  | 498 | 56.9 | 7.72 |      |

|        |                                                                                                                                                       |       |   |    |    |    |       |       |       |       |        |       |    |    |      |       |      |
|--------|-------------------------------------------------------------------------------------------------------------------------------------------------------|-------|---|----|----|----|-------|-------|-------|-------|--------|-------|----|----|------|-------|------|
| Q14690 | Protein RRP5<br>homolog<br>OS=Homo<br>sapiens<br>GN=PDCCD11<br>PE=1 SV=3 -<br>[RRP5_HUMAN]                                                            | 14.64 | 1 | 24 | 24 | 54 | 0.963 | 0.831 | 0.771 | 1.212 | 108.75 | 14.64 | 33 | 54 | 1871 | 208.6 | 8.87 |
| Q9HAK2 | Transcription<br>factor COE2<br>OS=Homo<br>sapiens<br>GN=EBF2<br>PE=1 SV=4 -<br>[COE2_HUMAN]                                                          | 3.65  | 1 | 1  | 1  | 3  | 2.630 | 2.125 | 1.649 | 1.212 | 0.00   | 3.65  | 1  | 3  | 575  | 62.6  | 9.06 |
| Q5TDH0 | Protein DDI1<br>homolog 2<br>OS=Homo<br>sapiens<br>GN=DDI2 PE=1<br>SV=1 -<br>[DDI2_HUMAN]                                                             | 23.31 | 1 | 7  | 8  | 26 | 1.065 | 0.939 | 0.936 | 1.212 | 60.53  | 23.31 | 12 | 26 | 399  | 44.5  | 5.05 |
| Q9NQZ5 | StAR-related<br>lipid transfer<br>protein 7,<br>mitochondrial<br>OS=Homo<br>sapiens<br>GN=STARD7<br>PE=1 SV=2 -<br>[STAR7_HUMAN<br>]                  | 4.05  | 1 | 2  | 2  | 3  | 0.814 | 0.744 | 1.413 | 1.212 | 7.79   | 4.05  | 2  | 3  | 370  | 43.1  | 8.95 |
| O75150 | E3 ubiquitin-<br>protein ligase<br>BRE1B<br>OS=Homo<br>sapiens<br>GN=RNF40<br>PE=1 SV=4 -<br>[BRE1B_HUMAN<br>]                                        | 17.68 | 2 | 13 | 17 | 40 | 1.022 | 1.256 | 0.989 | 1.212 | 97.39  | 17.68 | 22 | 40 | 1001 | 113.6 | 6.23 |
| Q9BSV6 | tRNA-splicing<br>endonuclease<br>subunit Sen34<br>OS=Homo<br>sapiens<br>GN=TSEN34<br>PE=1 SV=1 -<br>[SEN34_HUMAN<br>]                                 | 2.26  | 1 | 1  | 1  | 2  | 1.255 | 0.958 | 1.148 | 1.212 | 3.13   | 2.26  | 1  | 2  | 310  | 33.6  | 8.43 |
| Q6VAB6 | Kinase<br>suppressor of<br>Ras 2<br>OS=Homo<br>sapiens<br>GN=KSR2<br>PE=1 SV=2 -<br>[KSR2_HUMAN]                                                      | 1.37  | 1 | 1  | 1  | 1  | 1.015 | 0.969 | 0.996 | 1.213 | 0.00   | 1.37  | 1  | 1  | 950  | 107.6 | 8.69 |
| O76024 | Wolframin<br>OS=Homo<br>sapiens<br>GN=WFS1<br>PE=1 SV=2 -<br>[WFS1_HUMAN<br>]                                                                         | 20.56 | 1 | 17 | 17 | 40 | 0.916 | 0.850 | 0.948 | 1.213 | 96.73  | 20.56 | 22 | 40 | 890  | 100.2 | 8.05 |
| O43143 | Putative pre-<br>mRNA-splicing<br>factor ATP-<br>dependent<br>RNA helicase<br>DHX15<br>OS=Homo<br>sapiens<br>GN=DHX15<br>PE=1 SV=2 -<br>[DHX15_HUMAN] | 31.57 | 2 | 23 | 24 | 76 | 1.134 | 1.143 | 0.941 | 1.213 | 196.41 | 31.57 | 37 | 76 | 795  | 90.9  | 7.46 |

|        |                                                                                                                                                                                                                    |       |   |   |   |    |       |       |       |       |       |       |    |    |      |       |       |
|--------|--------------------------------------------------------------------------------------------------------------------------------------------------------------------------------------------------------------------|-------|---|---|---|----|-------|-------|-------|-------|-------|-------|----|----|------|-------|-------|
| Q9NR77 | Peroxisomal membrane protein 2<br>OS=Homo sapiens<br>GN=PXMP2<br>PE=1 SV=3 - [PXMP2_HUMAN]<br>Poly [ADP-ribose] polymerase 10<br>OS=Homo sapiens<br>GN=PARP10<br>PE=1 SV=2 - [PARP10_HUMAN]                        | 5.13  | 1 | 1 | 1 | 2  | 1.070 | 0.878 | 0.922 | 1.213 | 4.46  | 5.13  | 2  | 2  | 195  | 22.2  | 10.58 |
| Q53GL7 | Glycosyltransferase 8 domain-containing protein 2<br>OS=Homo sapiens<br>GN=GLT8D2<br>PE=2 SV=1 - [GLT8D2_HUMAN]<br>Gamma-glutamylaminocyclotransferase<br>OS=Homo sapiens<br>GN=GGACT<br>PE=1 SV=2 - [GGACT_HUMAN] | 9.66  | 1 | 6 | 6 | 28 | 1.797 | 1.226 | 1.126 | 1.213 | 58.09 | 9.66  | 11 | 28 | 1025 | 109.9 | 4.97  |
| Q9H1C3 | NADH dehydrogenase [ubiquinone] 1 alpha subcomplex subunit 1<br>OS=Homo sapiens<br>GN=NDUFA1<br>PE=1 SV=1 - [NDUA1_HUMAN]                                                                                          | 4.87  | 1 | 2 | 2 | 3  | 1.050 | 1.008 | 0.841 | 1.213 | 9.83  | 4.87  | 2  | 3  | 349  | 40.0  | 7.06  |
| Q9BVM4 | Kinesin-like protein KIF26B<br>OS=Homo sapiens<br>GN=KIF26B<br>PE=2 SV=1 - [KI26B_HUMAN]                                                                                                                           | 12.42 | 1 | 1 | 2 | 6  | 0.899 | 0.996 | 0.957 | 1.213 | 13.58 | 12.42 | 3  | 6  | 153  | 17.3  | 6.87  |
| O15239 | Peptidylprolyl isomerase domain and WD repeat-containing protein 1<br>OS=Homo sapiens<br>GN=PPWD1<br>PE=1 SV=1 - [PPWD1_HUMAN]                                                                                     | 8.57  | 1 | 1 | 1 | 2  | 0.665 | 1.214 | 0.727 | 1.213 | 3.86  | 8.57  | 1  | 2  | 70   | 8.1   | 8.84  |
| Q2KJY2 | Cat eye syndrome critical region protein 5<br>OS=Homo sapiens<br>GN=CECR5<br>PE=1 SV=1 - [CECR5_HUMAN]                                                                                                             | 2.85  | 1 | 3 | 3 | 4  | 3.077 | 1.014 | 0.947 | 1.213 | 6.93  | 2.85  | 4  | 4  | 2108 | 223.7 | 8.44  |
| Q96BP3 |                                                                                                                                                                                                                    | 2.79  | 1 | 2 | 2 | 5  | 1.048 | 1.613 | 1.109 | 1.213 | 13.09 | 2.79  | 3  | 5  | 646  | 73.5  | 7.15  |
| Q9BXW7 |                                                                                                                                                                                                                    | 15.37 | 1 | 6 | 6 | 17 | 0.939 | 1.181 | 0.927 | 1.213 | 51.84 | 15.37 | 8  | 17 | 423  | 46.3  | 8.13  |

|        |                                                                                                                               |       |   |    |    |     |       |       |       |       |        |       |    |     |      |       |       |
|--------|-------------------------------------------------------------------------------------------------------------------------------|-------|---|----|----|-----|-------|-------|-------|-------|--------|-------|----|-----|------|-------|-------|
| Q86UQ4 | ATP-binding cassette sub-family A member 13<br>OS=Homo sapiens<br>GN=ABCA13<br>PE=2 SV=3 - [ABCAD_HUMAN]                      | 0.97  | 4 | 2  | 5  | 11  | 0.904 | 1.054 | 0.934 | 1.214 | 14.22  | 0.97  | 5  | 11  | 5058 | 575.8 | 6.46  |
| Q8N3U4 | Cohesin subunit SA-2<br>OS=Homo sapiens<br>GN=STAG2<br>PE=1 SV=3 - [STAG2_HUMAN]                                              | 0.73  | 1 | 1  | 1  | 1   | 0.988 | 1.217 | 0.800 | 1.214 | 1.78   | 0.73  | 1  | 1   | 1231 | 141.2 | 5.43  |
| Q8N3E9 | 1-phosphatidylinositol 4,5-bisphosphate phosphodiesterase delta-3<br>OS=Homo sapiens<br>GN=PLCD3<br>PE=1 SV=3 - [PLCD3_HUMAN] | 14.45 | 2 | 8  | 8  | 15  | 1.786 | 0.807 | 1.761 | 1.214 | 38.84  | 14.45 | 12 | 15  | 789  | 89.2  | 6.98  |
| P07305 | Histone H1.0<br>OS=Homo sapiens<br>GN=H1FO<br>PE=1 SV=3 - [H1O_HUMAN]                                                         | 26.80 | 1 | 7  | 7  | 22  | 1.315 | 4.396 | 1.749 | 1.214 | 44.96  | 26.80 | 9  | 22  | 194  | 20.9  | 10.84 |
| Q9NX63 | MICOS complex subunit MIC19<br>OS=Homo sapiens<br>GN=CHCHD3<br>PE=1 SV=1 - [MIC19_HUMAN]                                      | 41.85 | 1 | 12 | 12 | 70  | 1.013 | 0.972 | 0.729 | 1.214 | 198.82 | 41.85 | 19 | 70  | 227  | 26.1  | 8.28  |
| Q13428 | Treade protein<br>OS=Homo sapiens<br>GN=TCOF1<br>PE=1 SV=3 - [TCOF_HUMAN]                                                     | 27.76 | 1 | 36 | 37 | 145 | 0.881 | 1.328 | 1.097 | 1.214 | 375.55 | 27.76 | 58 | 145 | 1488 | 152.0 | 9.04  |
| Q9NPL8 | Complex I assembly factor TIMMDC1, mitochondrial<br>OS=Homo sapiens<br>GN=TIMMDC1<br>PE=1 SV=2 - [TIDC1_HUMAN]                | 15.79 | 1 | 4  | 4  | 14  | 0.949 | 0.656 | 0.898 | 1.214 | 35.58  | 15.79 | 7  | 14  | 285  | 32.2  | 8.50  |
| O00533 | Neural cell adhesion molecule L1-like protein<br>OS=Homo sapiens<br>GN=CHL1 PE=1 SV=4 - [NCHL1_HUMAN]                         | 0.99  | 1 | 1  | 1  | 2   | 3.102 | 0.839 | 2.384 | 1.214 | 2.44   | 0.99  | 1  | 2   | 1208 | 135.0 | 5.76  |
| P51610 | Host cell factor 1<br>OS=Homo sapiens<br>GN=HCFC1<br>PE=1 SV=2 - [HCFC1_HUMAN]                                                | 6.58  | 1 | 12 | 12 | 36  | 1.248 | 1.371 | 1.036 | 1.214 | 73.70  | 6.58  | 20 | 36  | 2035 | 208.6 | 7.46  |

|        |                                                                                                                         |       |   |    |    |     |       |       |       |       |        |       |    |     |      |       |      |
|--------|-------------------------------------------------------------------------------------------------------------------------|-------|---|----|----|-----|-------|-------|-------|-------|--------|-------|----|-----|------|-------|------|
| Q7Z7M9 | Polypeptide N-acetylgalactosaminyltransferase 5<br>OS=Homo sapiens<br>GN=GALNT5<br>PE=1 SV=1 - [GALNT5_HUMAN]           | 8.09  | 1 | 7  | 8  | 23  | 0.979 | 0.530 | 0.574 | 1.214 | 40.89  | 8.09  | 13 | 23  | 940  | 106.2 | 9.47 |
| P49756 | RNA-binding protein 25<br>OS=Homo sapiens<br>GN=RBM25<br>PE=1 SV=3 - [RBM25_HUMAN]                                      | 21.71 | 1 | 13 | 14 | 43  | 1.163 | 1.264 | 1.025 | 1.214 | 96.87  | 21.71 | 21 | 43  | 843  | 100.1 | 6.32 |
| Q9BS26 | Endoplasmic reticulum resident protein 44<br>OS=Homo sapiens<br>GN=ERP44<br>PE=1 SV=1 - [ERP44_HUMAN]                   | 54.68 | 1 | 19 | 21 | 175 | 0.940 | 0.746 | 0.649 | 1.215 | 450.12 | 54.68 | 32 | 175 | 406  | 46.9  | 5.26 |
| Q92859 | Neogenin<br>OS=Homo sapiens<br>GN=NEO1<br>PE=1 SV=2 - [NEO1_HUMAN]                                                      | 6.78  | 1 | 6  | 6  | 19  | 1.585 | 0.760 | 1.143 | 1.215 | 47.29  | 6.78  | 8  | 19  | 1461 | 159.9 | 6.54 |
| P29084 | Transcription initiation factor IIE subunit beta<br>OS=Homo sapiens<br>GN=GTF2E2<br>PE=1 SV=1 - [T2EB_HUMAN]            | 10.31 | 1 | 3  | 3  | 6   | 1.096 | 0.891 | 0.814 | 1.215 | 15.30  | 10.31 | 5  | 6   | 291  | 33.0  | 9.66 |
| Q7Z417 | Nuclear fragile X mental retardation-interacting protein 2<br>OS=Homo sapiens<br>GN=NUFIP2<br>PE=1 SV=1 - [NUFP2_HUMAN] | 32.23 | 1 | 20 | 20 | 66  | 0.985 | 0.875 | 0.927 | 1.215 | 150.04 | 32.23 | 29 | 66  | 695  | 76.1  | 8.70 |
| Q8N7H5 | RNA polymerase II-associated factor 1 homolog<br>OS=Homo sapiens<br>GN=PAF1<br>PE=1 SV=2 - [PAF1_HUMAN]                 | 7.53  | 1 | 4  | 4  | 12  | 0.956 | 1.017 | 1.011 | 1.215 | 29.37  | 7.53  | 6  | 12  | 531  | 59.9  | 4.63 |
| Q9BWH2 | FUN14 domain-containing protein 2<br>OS=Homo sapiens<br>GN=FUNDC2<br>PE=1 SV=2 - [FUND2_HUMAN]                          | 17.99 | 1 | 3  | 3  | 12  | 0.765 | 0.540 | 0.469 | 1.216 | 34.05  | 17.99 | 5  | 12  | 189  | 20.7  | 9.73 |

|        |                                                                                                                     |       |   |    |    |     |       |       |       |       |         |       |    |     |      |       |      |
|--------|---------------------------------------------------------------------------------------------------------------------|-------|---|----|----|-----|-------|-------|-------|-------|---------|-------|----|-----|------|-------|------|
| P63096 | Guanine nucleotide-binding protein G(i) subunit alpha-1<br>OS=Homo sapiens<br>GN=GNAI1<br>PE=1 SV=2 - [GNAI1_HUMAN] | 40.11 | 4 | 5  | 14 | 99  | 2.283 | 0.780 | 0.856 | 1.216 | 248.26  | 40.11 | 26 | 99  | 354  | 40.3  | 5.97 |
| P19338 | Nucleolin<br>OS=Homo sapiens<br>GN=NCL PE=1 SV=3 - [NUCL_HUMAN]                                                     | 48.03 | 1 | 47 | 48 | 510 | 0.910 | 1.132 | 0.931 | 1.217 | 1268.29 | 48.03 | 78 | 510 | 710  | 76.6  | 4.70 |
| Q75T13 | GPI inositol-deacylase<br>OS=Homo sapiens<br>GN=PGAP1<br>PE=1 SV=1 - [PGAP1_HUMAN]                                  | 3.15  | 1 | 2  | 2  | 4   | 1.437 | 1.568 | 2.194 | 1.217 | 2.07    | 3.15  | 2  | 4   | 922  | 105.3 | 9.01 |
| Q99633 | Pre-mRNA-splicing factor 18<br>OS=Homo sapiens<br>GN=PRPF18<br>PE=1 SV=1 - [PRPF18_HUMAN]                           | 2.34  | 1 | 1  | 1  | 1   | 0.939 | 1.031 | 0.836 | 1.217 | 2.78    | 2.34  | 1  | 1   | 342  | 39.8  | 8.15 |
| Q99615 | DnaJ homolog subfamily C member 7<br>OS=Homo sapiens<br>GN=DNAJC7<br>PE=1 SV=2 - [DNAJC7_HUMAN]                     | 19.43 | 1 | 10 | 10 | 29  | 0.963 | 0.879 | 1.050 | 1.217 | 63.45   | 19.43 | 16 | 29  | 494  | 56.4  | 6.96 |
| O14976 | Cyclin-G-associated kinase<br>OS=Homo sapiens<br>GN=GAK PE=1 SV=2 - [GAK_HUMAN]                                     | 10.37 | 1 | 14 | 14 | 56  | 0.982 | 1.016 | 1.006 | 1.217 | 122.25  | 10.37 | 21 | 56  | 1311 | 143.1 | 5.73 |
| Q9NVK5 | FGFR1 oncogene partner 2<br>OS=Homo sapiens<br>GN=FGFR1OP2<br>PE=2 SV=1 - [FGOP2_HUMAN]                             | 6.32  | 1 | 2  | 2  | 6   | 1.207 | 0.830 | 1.418 | 1.217 | 15.76   | 6.32  | 2  | 6   | 253  | 29.4  | 6.00 |
| P50750 | Cyclin-dependent kinase 9<br>OS=Homo sapiens<br>GN=CDK9<br>PE=1 SV=3 - [CDK9_HUMAN]                                 | 22.85 | 9 | 6  | 9  | 32  | 1.117 | 1.053 | 0.905 | 1.217 | 74.12   | 22.85 | 12 | 32  | 372  | 42.8  | 8.79 |
| Q8N8N7 | Prostaglandin reductase 2<br>OS=Homo sapiens<br>GN=PTGR2<br>PE=1 SV=1 - [PTGR2_HUMAN]                               | 10.54 | 1 | 3  | 3  | 6   | 0.959 | 0.939 | 0.875 | 1.218 | 13.40   | 10.54 | 4  | 6   | 351  | 38.5  | 5.41 |



|        |                                                                                                                                                                                               |       |   |   |   |    |       |       |       |       |       |       |    |    |      |       |      |
|--------|-----------------------------------------------------------------------------------------------------------------------------------------------------------------------------------------------|-------|---|---|---|----|-------|-------|-------|-------|-------|-------|----|----|------|-------|------|
| Q13485 | Mothers<br>against<br>decapentaplegic<br>homolog 4<br>OS=Homo<br>sapiens<br>GN=SMAD4<br>PE=1 SV=1 -<br>[SMAD4_HUMA<br>UDP-glucuronic<br>acid/UDP-N-<br>acetylgalactosa<br>mine<br>transporter | 8.51  | 1 | 4 | 4 | 24 | 1.062 | 1.080 | 1.054 | 1.218 | 38.82 | 8.51  | 7  | 24 | 552  | 60.4  | 6.99 |
| Q9NTN3 | OS=Homo<br>sapiens<br>GN=SLC35D1<br>PE=1 SV=1 -<br>[S35D1_HUMAN<br>]<br>DnaJ homolog<br>subfamily B<br>member 12                                                                              | 2.25  | 1 | 1 | 1 | 3  | 2.899 | 0.664 | 0.604 | 1.218 | 1.89  | 2.25  | 2  | 3  | 355  | 39.2  | 8.97 |
| Q9NXW2 | OS=Homo<br>sapiens<br>GN=DNAJB12<br>PE=1 SV=4 -<br>[DJB12_HUMAN<br>]<br>Aftiphilin                                                                                                            | 26.40 | 1 | 8 | 9 | 19 | 1.186 | 0.772 | 0.835 | 1.218 | 55.01 | 26.40 | 13 | 19 | 375  | 41.8  | 8.53 |
| Q6ULP2 | OS=Homo<br>sapiens<br>GN=AFTPH<br>PE=1 SV=2 -<br>[AFTIN_HUMAN<br>]<br>Sodium<br>channel and<br>dathrin linker 1                                                                               | 4.48  | 1 | 4 | 4 | 12 | 1.048 | 1.216 | 1.135 | 1.218 | 32.04 | 4.48  | 6  | 12 | 937  | 102.1 | 4.54 |
| Q96NL6 | OS=Homo<br>sapiens<br>GN=SCLT1<br>PE=1 SV=2 -<br>[SCLT1_HUMAN<br>]<br>G protein-<br>regulated<br>inducer of<br>neurite<br>outgrowth 1                                                         | 4.65  | 1 | 2 | 3 | 3  | 0.958 | 1.272 | 1.515 | 1.218 | 3.03  | 4.65  | 3  | 3  | 688  | 80.9  | 6.07 |
| Q7Z2K8 | OS=Homo<br>sapiens<br>GN=GPRIN1<br>PE=2 SV=2 -<br>[GRINI_HUMAN<br>]<br>Syntaxin-5                                                                                                             | 3.67  | 1 | 3 | 3 | 9  | 1.239 | 0.729 | 1.263 | 1.218 | 20.54 | 3.67  | 3  | 9  | 1008 | 102.3 | 8.06 |
| Q13190 | OS=Homo<br>sapiens<br>GN=STX5<br>PE=1 SV=2 -<br>[STX5_HUMAN]                                                                                                                                  | 23.38 | 1 | 7 | 7 | 22 | 1.133 | 1.204 | 1.113 | 1.218 | 59.52 | 23.38 | 14 | 22 | 355  | 39.6  | 9.16 |
| Q16637 | Survival motor<br>neuron protein<br>OS=Homo<br>sapiens<br>GN=SMN1<br>PE=1 SV=1 -<br>[SMN_HUMAN]                                                                                               | 6.80  | 1 | 3 | 3 | 7  | 0.907 | 1.022 | 0.900 | 1.219 | 2.25  | 6.80  | 5  | 7  | 294  | 31.8  | 6.55 |
| Q9BTE6 | Alanyl-tRNA<br>editing protein<br>Aarsd1<br>OS=Homo<br>sapiens<br>GN=AARSD1<br>PE=1 SV=2 -<br>[AASD1_HUMAN<br>]                                                                               | 18.93 | 1 | 3 | 5 | 9  | 0.916 | 1.216 | 1.018 | 1.219 | 20.11 | 18.93 | 7  | 9  | 412  | 45.5  | 6.42 |

|        |                                                                                                            |       |   |    |    |    |       |       |       |       |       |       |    |    |      |       |       |
|--------|------------------------------------------------------------------------------------------------------------|-------|---|----|----|----|-------|-------|-------|-------|-------|-------|----|----|------|-------|-------|
| Q92541 | RNA polymerase-associated protein RTF1 homolog<br>OS=Homo sapiens<br>GN=RTF1<br>PE=1 SV=4 - [RTF1_HUMAN]   | 19.86 | 1 | 13 | 14 | 32 | 1.140 | 1.154 | 1.046 | 1.219 | 72.57 | 19.86 | 18 | 32 | 710  | 80.3  | 8.15  |
| Q969Q5 | Ras-related protein Rab-24<br>OS=Homo sapiens<br>GN=RAB24<br>PE=1 SV=1 - [RAB24_HUMAN]                     | 16.26 | 1 | 3  | 3  | 17 | 1.157 | 0.999 | 1.075 | 1.219 | 47.18 | 16.26 | 5  | 17 | 203  | 23.1  | 6.23  |
| Q8N201 | Integrator complex subunit 1<br>OS=Homo sapiens<br>GN=INTS1<br>PE=1 SV=2 - [INT1_HUMAN]                    | 4.11  | 1 | 6  | 6  | 24 | 1.082 | 1.398 | 1.107 | 1.219 | 52.88 | 4.11  | 12 | 24 | 2190 | 244.1 | 6.13  |
| P15692 | Vascular endothelial growth factor A<br>OS=Homo sapiens<br>GN=VEGFA<br>PE=1 SV=2 - [VEGFA_HUMAN]           | 3.02  | 1 | 1  | 1  | 2  | 0.646 | 0.465 | 0.439 | 1.219 | 5.68  | 3.02  | 1  | 2  | 232  | 27.0  | 8.91  |
| P32189 | Glycerol kinase<br>OS=Homo sapiens<br>GN=GK<br>PE=1 SV=3 - [GLPK_HUMAN]                                    | 19.50 | 3 | 11 | 11 | 37 | 1.198 | 1.153 | 0.364 | 1.219 | 97.37 | 19.50 | 17 | 37 | 559  | 61.2  | 6.54  |
| Q9NVS2 | 28S ribosomal protein S18a, mitochondrial<br>OS=Homo sapiens<br>GN=MRPS18A<br>PE=1 SV=1 - [RT18A_HUMAN]    | 8.67  | 1 | 2  | 2  | 4  | 0.953 | 1.316 | 1.202 | 1.219 | 7.45  | 8.67  | 3  | 4  | 196  | 22.2  | 10.33 |
| Q96K80 | Zinc finger CCCH domain-containing protein 10<br>OS=Homo sapiens<br>GN=ZC3H10<br>PE=1 SV=1 - [ZC3HA_HUMAN] | 9.22  | 1 | 2  | 3  | 6  | 0.773 | 1.017 | 0.941 | 1.219 | 11.57 | 9.22  | 3  | 6  | 434  | 46.0  | 7.64  |
| Q16650 | T-box brain protein 1<br>OS=Homo sapiens<br>GN=TBR1<br>PE=1 SV=1 - [TBR1_HUMAN]                            | 2.20  | 1 | 1  | 1  | 1  | 2.611 | 0.795 | 1.459 | 1.219 | 2.85  | 2.20  | 1  | 1  | 682  | 74.0  | 7.33  |
| Q9BYD6 | 39S ribosomal protein L1, mitochondrial<br>OS=Homo sapiens<br>GN=MRPL1<br>PE=1 SV=2 - [RM01_HUMAN]         | 20.00 | 1 | 7  | 7  | 14 | 0.969 | 1.480 | 1.011 | 1.220 | 31.18 | 20.00 | 9  | 14 | 325  | 36.9  | 8.78  |

|        |                                                                                                                                                                                                                                                                                                                                                                                                                                                                                                                                                                                                                                                                                                                                                                                                                                                                                                                                                                 |       |   |    |    |    |       |       |       |       |       |       |    |    |      |       |      |
|--------|-----------------------------------------------------------------------------------------------------------------------------------------------------------------------------------------------------------------------------------------------------------------------------------------------------------------------------------------------------------------------------------------------------------------------------------------------------------------------------------------------------------------------------------------------------------------------------------------------------------------------------------------------------------------------------------------------------------------------------------------------------------------------------------------------------------------------------------------------------------------------------------------------------------------------------------------------------------------|-------|---|----|----|----|-------|-------|-------|-------|-------|-------|----|----|------|-------|------|
| O94913 | Pre-mRNA<br>cleavage<br>complex 2<br>protein Pcf11<br>OS=Homo<br>sapiens<br>GN=PCF11<br>PE=1 SV=3 -<br>[PCF11_HUMAN<br>]<br>Dihydropyrimidi<br>nase-related<br>protein 5<br>OS=Homo<br>sapiens<br>GN=DPYSL5<br>PE=1 SV=1 -<br>[DPYL5_HUMAN<br>]<br>Nuclear factor<br>NF-kappa-B<br>p100 subunit<br>OS=Homo<br>sapiens<br>GN=NFKB2<br>PE=1 SV=4 -<br>[NFKB2_HUMAN<br>]<br>Katanin p60<br>ATPase-<br>containing<br>subunit A1<br>OS=Homo<br>sapiens<br>GN=KATNA1<br>PE=1 SV=1 -<br>[KTNA1_HUMAN<br>]<br>Adenosine<br>deaminase<br>domain-<br>containing<br>protein 1<br>OS=Homo<br>sapiens<br>GN=ADAD1<br>PE=2 SV=1 -<br>[ADAD1_HUMAN<br>]<br>THAP domain-<br>containing<br>protein 4<br>OS=Homo<br>sapiens<br>GN=THAP4<br>PE=1 SV=2 -<br>[THAP4_HUMAN<br>]<br>Nucleolar<br>protein 16<br>OS=Homo<br>sapiens<br>GN=NOP16<br>PE=1 SV=2 -<br>[NOP16_HUMA<br>N]<br>Transmembran<br>e protein 2<br>OS=Homo<br>sapiens<br>GN=TMEM2<br>PE=1 SV=1 -<br>[TMEM2_HUMA<br>N] | 2.38  | 1 | 3  | 4  | 6  | 1.314 | 0.724 | 0.945 | 1.220 | 11.31 | 2.38  | 5  | 6  | 1555 | 172.9 | 8.48 |
| Q9BPU6 |                                                                                                                                                                                                                                                                                                                                                                                                                                                                                                                                                                                                                                                                                                                                                                                                                                                                                                                                                                 | 1.24  | 1 | 1  | 1  | 3  | 1.307 | 2.038 | 0.853 | 1.220 | 6.27  | 1.24  | 2  | 3  | 564  | 61.4  | 7.20 |
| Q00653 |                                                                                                                                                                                                                                                                                                                                                                                                                                                                                                                                                                                                                                                                                                                                                                                                                                                                                                                                                                 | 20.78 | 1 | 15 | 16 | 36 | 1.458 | 1.042 | 1.472 | 1.220 | 91.99 | 20.78 | 22 | 36 | 900  | 96.7  | 6.25 |
| O75449 |                                                                                                                                                                                                                                                                                                                                                                                                                                                                                                                                                                                                                                                                                                                                                                                                                                                                                                                                                                 | 8.76  | 1 | 4  | 4  | 5  | 0.846 | 0.963 | 0.951 | 1.220 | 12.21 | 8.76  | 5  | 5  | 491  | 55.9  | 6.90 |
| Q96M93 |                                                                                                                                                                                                                                                                                                                                                                                                                                                                                                                                                                                                                                                                                                                                                                                                                                                                                                                                                                 | 1.56  | 1 | 1  | 1  | 1  | 2.507 | 2.453 | 2.488 | 1.220 | 0.00  | 1.56  | 1  | 1  | 576  | 64.4  | 9.01 |
| Q8WY91 |                                                                                                                                                                                                                                                                                                                                                                                                                                                                                                                                                                                                                                                                                                                                                                                                                                                                                                                                                                 | 1.04  | 1 | 1  | 1  | 1  | 1.136 | 1.753 | 0.964 | 1.220 | 0.00  | 1.04  | 1  | 1  | 577  | 62.9  | 9.28 |
| Q9Y3C1 |                                                                                                                                                                                                                                                                                                                                                                                                                                                                                                                                                                                                                                                                                                                                                                                                                                                                                                                                                                 | 32.58 | 1 | 6  | 6  | 28 | 0.610 | 0.817 | 0.795 | 1.220 | 67.59 | 32.58 | 11 | 28 | 178  | 21.2  | 9.94 |
| Q9UHN6 |                                                                                                                                                                                                                                                                                                                                                                                                                                                                                                                                                                                                                                                                                                                                                                                                                                                                                                                                                                 | 5.13  | 1 | 7  | 7  | 12 | 0.872 | 0.690 | 1.098 | 1.220 | 21.62 | 5.13  | 11 | 12 | 1383 | 154.3 | 8.15 |

|        |                                                                                                                                                                                                                                                  |       |   |    |    |     |       |       |       |       |         |       |    |     |      |       |       |
|--------|--------------------------------------------------------------------------------------------------------------------------------------------------------------------------------------------------------------------------------------------------|-------|---|----|----|-----|-------|-------|-------|-------|---------|-------|----|-----|------|-------|-------|
| O75643 | U5 small<br>nuclear<br>ribonucleoprotein<br>200 kDa<br>helicase<br>OS=Homo<br>sapiens<br>GN=SNRNP200<br>PE=1 SV=2 -<br>[US20_HUMAN]<br>BRCA1-<br>associated ATM<br>activator 1<br>OS=Homo<br>sapiens<br>GN=BRAT1<br>PE=1 SV=2 -<br>[BRAT1_HUMAN] | 25.66 | 1 | 49 | 49 | 143 | 1.134 | 1.072 | 0.929 | 1.220 | 341.84  | 25.66 | 75 | 143 | 2136 | 244.4 | 6.06  |
| Q6PJG6 | Paraneoplastic<br>antigen Ma1<br>OS=Homo<br>sapiens<br>GN=BRAT1<br>PE=1 SV=2 -<br>[BRAT1_HUMAN]                                                                                                                                                  | 0.97  | 1 | 1  | 1  | 1   | 0.798 | 1.272 | 1.377 | 1.220 | 2.60    | 0.97  | 1  | 1   | 821  | 88.1  | 5.27  |
| Q8ND90 | Protein<br>disulfide-<br>isomerase A4<br>OS=Homo<br>sapiens<br>GN=PNMA1<br>PE=1 SV=2 -<br>[PNMA1_HUMAN]                                                                                                                                          | 7.08  | 1 | 2  | 2  | 4   | 1.768 | 1.601 | 1.938 | 1.220 | 4.56    | 7.08  | 4  | 4   | 353  | 39.7  | 4.83  |
| P13667 | Heterogeneous<br>nuclear<br>ribonucleoprotein<br>H<br>OS=Homo<br>sapiens<br>GN=PDIA4<br>PE=1 SV=2 -<br>[PDIA4_HUMAN]                                                                                                                             | 62.33 | 2 | 47 | 49 | 484 | 0.933 | 1.153 | 1.042 | 1.220 | 1226.84 | 62.33 | 79 | 484 | 645  | 72.9  | 5.07  |
| P31943 | ER membrane<br>protein<br>complex<br>subunit 10<br>OS=Homo<br>sapiens<br>GN=HNRNPH1<br>PE=1 SV=4 -<br>[HNRH1_HUMAN]                                                                                                                              | 52.34 | 1 | 7  | 16 | 196 | 1.099 | 1.416 | 1.132 | 1.221 | 591.28  | 52.34 | 27 | 196 | 449  | 49.2  | 6.30  |
| Q5UCC4 | Serine/threonine-<br>protein<br>kinase PRP4<br>homolog<br>OS=Homo<br>sapiens<br>GN=EMC10<br>PE=1 SV=1 -<br>[EMC10_HUMAN]                                                                                                                         | 23.66 | 1 | 5  | 5  | 20  | 1.044 | 1.128 | 1.126 | 1.221 | 52.06   | 23.66 | 9  | 20  | 262  | 27.3  | 6.13  |
| Q13523 | Chromodomain-<br>helicase-DNA-<br>binding protein<br>4 OS=Homo<br>sapiens<br>GN=PRPF4B<br>PE=1 SV=3 -<br>[PRP4B_HUMAN]                                                                                                                           | 12.21 | 1 | 10 | 11 | 26  | 0.981 | 1.301 | 0.996 | 1.221 | 66.24   | 12.21 | 16 | 26  | 1007 | 116.9 | 10.26 |
| Q14839 | Chromodomain-<br>helicase-DNA-<br>binding protein<br>4 OS=Homo<br>sapiens<br>GN=CHD4<br>PE=1 SV=2 -<br>[CHD4_HUMAN]                                                                                                                              | 10.20 | 1 | 12 | 16 | 49  | 0.987 | 1.172 | 0.802 | 1.221 | 108.08  | 10.20 | 26 | 49  | 1912 | 217.9 | 5.86  |

|        |                                                                                                                               |       |    |   |   |    |       |       |       |       |       |       |   |    |      |       |      |
|--------|-------------------------------------------------------------------------------------------------------------------------------|-------|----|---|---|----|-------|-------|-------|-------|-------|-------|---|----|------|-------|------|
| P11166 | Solute carrier family 2, facilitated glucose transporter member 1<br>OS=Homo sapiens<br>GN=SLC2A1<br>PE=1 SV=2 - [GTR1_HUMAN] | 10.77 | 1  | 6 | 6 | 26 | 2.125 | 0.372 | 1.069 | 1.222 | 61.03 | 10.77 | 9 | 26 | 492  | 54.0  | 8.72 |
| P52298 | Nuclear cap-binding protein subunit 2<br>OS=Homo sapiens<br>GN=NCBP2<br>PE=1 SV=1 - [NCBP2_HUMAN]                             | 12.18 | 1  | 2 | 2 | 5  | 1.166 | 0.998 | 0.770 | 1.222 | 9.44  | 12.18 | 4 | 5  | 156  | 18.0  | 8.21 |
| Q81YG6 | Leucine-rich repeat-containing protein 56<br>OS=Homo sapiens<br>GN=LRRCS6<br>PE=2 SV=1 - [LRC56_HUMAN]                        | 1.11  | 2  | 1 | 1 | 1  | 0.570 | 0.761 | 0.627 | 1.222 | 1.85  | 1.11  | 1 | 1  | 542  | 58.7  | 7.90 |
| Q9NPF4 | Probable tRNA N6-adenosine threonylcarbamoyltransferase<br>OS=Homo sapiens<br>GN=OSGEP<br>PE=1 SV=1 - [OSGEP_HUMAN]           | 13.13 | 1  | 4 | 4 | 11 | 1.136 | 1.327 | 1.022 | 1.222 | 18.62 | 13.13 | 7 | 11 | 335  | 36.4  | 6.35 |
| Q92759 | General transcription factor IIH subunit 4<br>OS=Homo sapiens<br>GN=GTF2H4<br>PE=2 SV=1 - [TF2H4_HUMAN]                       | 1.52  | 1  | 1 | 1 | 3  | 0.979 | 0.984 | 0.784 | 1.222 | 6.76  | 1.52  | 2 | 3  | 462  | 52.2  | 9.04 |
| A8MUK1 | Ubiquitin carboxyl-terminal hydrolase 17-like protein 5<br>OS=Homo sapiens<br>GN=USP17L5<br>PE=3 SV=2 - [U17L5_HUMAN]         | 4.34  | 15 | 2 | 2 | 19 | 1.267 | 0.912 | 1.212 | 1.222 | 36.93 | 4.34  | 3 | 19 | 530  | 59.6  | 8.07 |
| O14802 | DNA-directed RNA polymerase III subunit RPC1<br>OS=Homo sapiens<br>GN=POLR3A<br>PE=1 SV=2 - [RPC1_HUMAN]                      | 4.46  | 1  | 5 | 5 | 6  | 0.893 | 1.122 | 1.036 | 1.222 | 15.64 | 4.46  | 6 | 6  | 1390 | 155.5 | 8.48 |

|        |                                                                                                                                         |       |   |    |    |    |       |       |       |       |        |       |    |    |      |       |      |
|--------|-----------------------------------------------------------------------------------------------------------------------------------------|-------|---|----|----|----|-------|-------|-------|-------|--------|-------|----|----|------|-------|------|
| Q9BQ95 | Evolutionarily conserved signaling intermediate in Toll pathway, mitochondrial OS=Homo sapiens<br>GN=ECSIT<br>PE=1 SV=1 - [ECSIT_HUMAN] | 8.35  | 1 | 2  | 2  | 9  | 1.210 | 1.023 | 0.658 | 1.223 | 17.45  | 8.35  | 3  | 9  | 431  | 49.1  | 6.29 |
| Q08ADI | Calmodulin-regulated spectrin-associated protein 2 OS=Homo sapiens<br>GN=CAMSAP2<br>PE=1 SV=3 - [CAMP2_HUMAN]                           | 10.54 | 1 | 12 | 13 | 23 | 1.007 | 0.866 | 1.201 | 1.223 | 40.15  | 10.54 | 18 | 23 | 1489 | 168.0 | 6.80 |
| Q8TCD1 | UPF0729 protein C18orf32 OS=Homo sapiens<br>GN=C18orf32<br>PE=2 SV=1 - [CR032_HUMAN]                                                    | 30.26 | 1 | 5  | 5  | 25 | 1.578 | 1.202 | 0.846 | 1.223 | 52.09  | 30.26 | 7  | 25 | 76   | 8.7   | 9.13 |
| P30049 | ATP synthase subunit delta, mitochondrial OS=Homo sapiens<br>GN=ATP5D<br>PE=1 SV=2 - [ATPD_HUMAN]                                       | 17.26 | 1 | 2  | 3  | 89 | 1.064 | 1.054 | 0.821 | 1.223 | 301.16 | 17.26 | 5  | 89 | 168  | 17.5  | 5.49 |
| P98179 | Putative RNA-binding protein 3 OS=Homo sapiens<br>GN=RBM3<br>PE=1 SV=1 - [RBM3_HUMAN]                                                   | 43.95 | 1 | 4  | 4  | 31 | 1.465 | 1.390 | 1.457 | 1.224 | 67.54  | 43.95 | 5  | 31 | 157  | 17.2  | 8.91 |
| Q9H7F0 | Probable cation-transporting ATPase 13A3 OS=Homo sapiens<br>GN=ATP13A3<br>PE=1 SV=4 - [AT133_HUMAN]                                     | 0.90  | 1 | 1  | 1  | 4  | 1.210 | 0.586 | 0.714 | 1.224 | 7.16   | 0.90  | 2  | 4  | 1226 | 138.0 | 6.64 |
| Q9H0U6 | 39S ribosomal protein L18, mitochondrial OS=Homo sapiens<br>GN=MRPL18<br>PE=1 SV=1 - [RM18_HUMAN]                                       | 17.78 | 1 | 3  | 3  | 8  | 0.833 | 1.001 | 0.885 | 1.224 | 10.59  | 17.78 | 5  | 8  | 180  | 20.6  | 9.54 |
| Q6NXT4 | Zinc transporter 6 OS=Homo sapiens<br>GN=SLC30A6<br>PE=1 SV=2 - [ZNT6_HUMAN]                                                            | 11.71 | 1 | 3  | 3  | 6  | 0.848 | 0.748 | 0.986 | 1.224 | 13.73  | 11.71 | 5  | 6  | 461  | 51.1  | 9.16 |

|        |                                                                                                                                  |       |   |    |    |     |       |       |       |       |        |       |    |     |      |       |      |
|--------|----------------------------------------------------------------------------------------------------------------------------------|-------|---|----|----|-----|-------|-------|-------|-------|--------|-------|----|-----|------|-------|------|
| Q8IV50 | LysM and putative peptidoglycan-binding domain-containing protein 2<br>OS=Homo sapiens<br>GN=LYSMD2<br>PE=1 SV=1 - [LYSM2_HUMAN] | 7.44  | 1 | 1  | 2  | 3   | 0.988 | 0.889 | 0.945 | 1.224 | 1.75   | 7.44  | 2  | 3   | 215  | 23.4  | 5.35 |
| P20290 | Transcription factor BTF3<br>OS=Homo sapiens<br>GN=BTF3<br>PE=1 SV=1 - [BTF3_HUMAN]                                              | 36.89 | 1 | 6  | 6  | 22  | 0.899 | 1.084 | 1.423 | 1.224 | 61.32  | 36.89 | 11 | 22  | 206  | 22.2  | 9.38 |
| Q96RY7 | Intraflagellar transport protein 140 homolog<br>OS=Homo sapiens<br>GN=IFT140<br>PE=1 SV=1 - [IF140_HUMAN]                        | 3.49  | 1 | 3  | 3  | 5   | 1.135 | 1.116 | 0.939 | 1.224 | 9.15   | 3.49  | 3  | 5   | 1462 | 165.1 | 6.04 |
| O95104 | Splicing factor, arginine/serine-rich 15<br>OS=Homo sapiens<br>GN=SCAF4<br>PE=1 SV=3 - [SFR15_HUMAN]                             | 3.40  | 1 | 3  | 3  | 7   | 1.199 | 1.926 | 1.301 | 1.224 | 15.21  | 3.40  | 4  | 7   | 1147 | 125.8 | 9.55 |
| P63279 | SUMO-conjugating enzyme UBC9<br>OS=Homo sapiens<br>GN=UBE2I<br>PE=1 SV=1 - [UBC9_HUMAN]                                          | 34.81 | 1 | 7  | 7  | 33  | 1.225 | 1.509 | 0.957 | 1.225 | 67.44  | 34.81 | 11 | 33  | 158  | 18.0  | 8.66 |
| P30040 | Endoplasmic reticulum resident protein 29<br>OS=Homo sapiens<br>GN=ERP29<br>PE=1 SV=4 - [ERP29_HUMAN]                            | 54.79 | 1 | 14 | 14 | 107 | 1.046 | 1.096 | 0.808 | 1.225 | 353.54 | 54.79 | 20 | 107 | 261  | 29.0  | 7.31 |
| Q9P2I0 | Cleavage and polyadenylation specificity factor subunit 2<br>OS=Homo sapiens<br>GN=CPSF2<br>PE=1 SV=2 - [CPSF2_HUMAN]            | 3.32  | 1 | 2  | 3  | 7   | 0.934 | 0.775 | 0.989 | 1.225 | 8.53   | 3.32  | 3  | 7   | 782  | 88.4  | 5.11 |
| Q99543 | DnaJ homolog subfamily C member 2<br>OS=Homo sapiens<br>GN=DNAJC2<br>PE=1 SV=4 - [DNAJC2_HUMAN]                                  | 14.98 | 1 | 11 | 11 | 28  | 0.924 | 1.146 | 1.058 | 1.225 | 68.18  | 14.98 | 19 | 28  | 621  | 72.0  | 8.70 |





|        |                                                                                                      |       |   |    |    |     |       |       |       |       |        |       |    |     |      |       |       |
|--------|------------------------------------------------------------------------------------------------------|-------|---|----|----|-----|-------|-------|-------|-------|--------|-------|----|-----|------|-------|-------|
| Q07955 | Serine/arginine-rich splicing factor 1<br>OS=Homo sapiens<br>GN=SRSF1<br>PE=1 SV=2 - [SRSF1_HUMAN]   | 42.34 | 1 | 14 | 14 | 103 | 1.063 | 1.268 | 1.031 | 1.227 | 241.36 | 42.34 | 24 | 103 | 248  | 27.7  | 10.36 |
| P08574 | Cytochrome c1, heme protein, mitochondrial<br>OS=Homo sapiens<br>GN=CYC1<br>PE=1 SV=3 - [CY1_HUMAN]  | 18.77 | 1 | 5  | 5  | 18  | 0.979 | 1.007 | 0.646 | 1.227 | 48.97  | 18.77 | 7  | 18  | 325  | 35.4  | 9.00  |
| Q96MP8 | BTB/POZ domain-containing protein KCTD7<br>OS=Homo sapiens<br>GN=KCTD7<br>PE=1 SV=1 - [KCTD7_HUMAN]  | 3.11  | 1 | 1  | 1  | 2   | 1.315 | 1.288 | 1.346 | 1.228 | 3.56   | 3.11  | 2  | 2   | 289  | 33.1  | 5.91  |
| O43290 | U4/U6.U5 tri-snRNP-associated protein 1<br>OS=Homo sapiens<br>GN=SART1<br>PE=1 SV=1 - [SNUT1_HUMAN]  | 19.88 | 2 | 13 | 13 | 54  | 1.066 | 1.282 | 0.941 | 1.228 | 146.33 | 19.88 | 21 | 54  | 800  | 90.2  | 6.13  |
| Q9BWJ5 | Splicing factor 3B subunit 5<br>OS=Homo sapiens<br>GN=SF3B5<br>PE=1 SV=1 - [SF3B5_HUMAN]             | 32.56 | 1 | 3  | 3  | 8   | 1.248 | 1.419 | 0.978 | 1.228 | 16.32  | 32.56 | 5  | 8   | 86   | 10.1  | 6.35  |
| Q9BYD1 | 39S ribosomal protein L13, mitochondrial<br>OS=Homo sapiens<br>GN=MRPL13<br>PE=1 SV=1 - [RM13_HUMAN] | 28.09 | 1 | 4  | 4  | 15  | 1.151 | 1.621 | 1.115 | 1.228 | 32.31  | 28.09 | 7  | 15  | 178  | 20.7  | 9.16  |
| Q9UHY7 | Enolase-phosphatase E1<br>OS=Homo sapiens<br>GN=ENOPH1<br>PE=1 SV=1 - [ENOPH_HUMAN]                  | 13.79 | 1 | 3  | 3  | 5   | 1.439 | 1.454 | 1.221 | 1.229 | 11.71  | 13.79 | 5  | 5   | 261  | 28.9  | 4.78  |
| P22003 | Bone morphogenetic protein 5<br>OS=Homo sapiens<br>GN=BMP5<br>PE=2 SV=1 - [BMP5_HUMAN]               | 3.96  | 1 | 1  | 1  | 1   | 1.648 | 0.943 | 0.660 | 1.229 | 0.00   | 3.96  | 1  | 1   | 454  | 51.7  | 8.88  |
| O75592 | E3 ubiquitin-protein ligase MYCBP2<br>OS=Homo sapiens<br>GN=MYCBP2<br>PE=1 SV=3 - [MYCB2_HUMAN]      | 2.00  | 1 | 9  | 9  | 18  | 1.055 | 0.974 | 0.951 | 1.229 | 35.22  | 2.00  | 12 | 18  | 4640 | 509.8 | 7.03  |

|        |                                                                                                                                                            |       |   |   |    |    |       |       |       |       |       |       |    |    |      |       |       |
|--------|------------------------------------------------------------------------------------------------------------------------------------------------------------|-------|---|---|----|----|-------|-------|-------|-------|-------|-------|----|----|------|-------|-------|
| P27694 | Replication protein A 70 kDa DNA-binding subunit<br>OS=Homo sapiens<br>GN=RPA1<br>PE=1 SV=2 - [RFA1_HUMAN]                                                 | 19.48 | 1 | 8 | 8  | 29 | 1.526 | 1.492 | 1.245 | 1.229 | 54.19 | 19.48 | 14 | 29 | 616  | 68.1  | 7.21  |
| Q9BYN8 | 28S ribosomal protein S26, mitochondrial<br>OS=Homo sapiens<br>GN=MRPS26<br>PE=1 SV=1 - [RT26_HUMAN]                                                       | 28.78 | 1 | 6 | 6  | 17 | 0.981 | 1.397 | 1.076 | 1.229 | 40.37 | 28.78 | 9  | 17 | 205  | 24.2  | 10.39 |
| Q6ZRP7 | Sulfhydryl oxidase 2<br>OS=Homo sapiens<br>GN=QSOX2<br>PE=1 SV=3 - [QSOX2_HUMAN]                                                                           | 7.88  | 1 | 5 | 5  | 12 | 0.912 | 0.861 | 0.766 | 1.230 | 29.87 | 7.88  | 7  | 12 | 698  | 77.5  | 7.72  |
| Q9Y5A9 | YTH domain-containing family protein 2<br>OS=Homo sapiens<br>GN=YTHDF2<br>PE=1 SV=2 - [YTHD2_HUMAN]                                                        | 12.61 | 1 | 6 | 6  | 19 | 0.843 | 0.956 | 0.980 | 1.230 | 21.76 | 12.61 | 8  | 19 | 579  | 62.3  | 8.79  |
| O75208 | Ubiquinone biosynthesis protein COQ9, mitochondrial<br>OS=Homo sapiens<br>GN=COQ9<br>PE=1 SV=1 - [COQ9_HUMAN]                                              | 10.38 | 1 | 3 | 3  | 7  | 1.024 | 2.153 | 1.002 | 1.230 | 11.49 | 10.38 | 5  | 7  | 318  | 35.5  | 5.94  |
| Q9BQ69 | O-acetyl-ADP-ribose deacetylase<br>MACROD1<br>OS=Homo sapiens<br>GN=MACROD1<br>PE=1 SV=2 - [MACD1_HUMAN]                                                   | 13.23 | 1 | 3 | 3  | 3  | 1.117 | 1.397 | 0.985 | 1.230 | 9.46  | 13.23 | 3  | 3  | 325  | 35.5  | 9.51  |
| Q12824 | SWI/SNF-related matrix-associated actin-dependent regulator of chromatin subfamily B member 1<br>OS=Homo sapiens<br>GN=SMARCB1<br>PE=1 SV=2 - [SNF5_HUMAN] | 11.69 | 1 | 4 | 4  | 11 | 1.124 | 1.178 | 1.073 | 1.230 | 24.69 | 11.69 | 7  | 11 | 385  | 44.1  | 6.23  |
| P11277 | Spectrin beta chain, erythrocytic<br>OS=Homo sapiens<br>GN=SPTB<br>PE=1 SV=5 - [SPTB1_HUMAN]                                                               | 4.68  | 1 | 2 | 11 | 49 | 1.286 | 0.395 | 1.436 | 1.230 | 93.94 | 4.68  | 17 | 49 | 2137 | 246.3 | 5.27  |

|        |                                                                                                    |       |   |    |    |    |       |       |       |       |        |       |    |    |      |       |      |
|--------|----------------------------------------------------------------------------------------------------|-------|---|----|----|----|-------|-------|-------|-------|--------|-------|----|----|------|-------|------|
| P35658 | Nuclear pore complex protein Nup214<br>OS=Homo sapiens<br>GN=NUP214<br>PE=1 SV=2 - [NU214_HUMAN]   | 12.01 | 3 | 19 | 21 | 72 | 1.150 | 1.251 | 0.972 | 1.230 | 158.27 | 12.01 | 34 | 72 | 2090 | 213.5 | 7.47 |
| P78345 | Ribonuclease P protein subunit p38 OS=Homo sapiens<br>GN=RPP38<br>PE=1 SV=2 - [RPP38_HUMAN]        | 4.59  | 1 | 1  | 2  | 3  | 0.744 | 0.796 | 0.714 | 1.231 | 4.41   | 4.59  | 2  | 3  | 283  | 31.8  | 9.92 |
| Q8WY22 | BRI3-binding protein OS=Homo sapiens<br>GN=BRI3BP<br>PE=1 SV=1 - [BRI3B_HUMAN]                     | 9.56  | 1 | 2  | 2  | 7  | 1.250 | 0.646 | 0.642 | 1.231 | 25.02  | 9.56  | 3  | 7  | 251  | 27.8  | 9.44 |
| Q8IYU8 | Calcium uptake protein 2, mitochondrial OS=Homo sapiens<br>GN=MICU2<br>PE=1 SV=2 - [MICU2_HUMAN]   | 10.37 | 1 | 3  | 3  | 6  | 0.758 | 0.641 | 0.697 | 1.231 | 18.47  | 10.37 | 4  | 6  | 434  | 49.6  | 9.09 |
| Q9Y2R4 | Probable ATP-dependent RNA helicase DDX52 OS=Homo sapiens<br>GN=DDX52<br>PE=1 SV=3 - [DDX52_HUMAN] | 6.34  | 1 | 3  | 4  | 5  | 0.762 | 0.640 | 0.865 | 1.231 | 9.18   | 6.34  | 5  | 5  | 599  | 67.5  | 9.67 |
| Q9NUJ7 | ATP-dependent RNA helicase DDX19A OS=Homo sapiens<br>GN=DDX19A<br>PE=1 SV=1 - [DD19A_HUMAN]        | 25.94 | 2 | 13 | 13 | 92 | 1.076 | 1.172 | 1.069 | 1.231 | 187.82 | 25.94 | 21 | 92 | 478  | 53.9  | 6.58 |
| Q75N03 | E3 ubiquitin-protein ligase Hakai OS=Homo sapiens<br>GN=CBL1<br>PE=1 SV=1 - [HAKAI_HUMAN]          | 10.39 | 1 | 3  | 3  | 6  | 0.837 | 1.078 | 1.168 | 1.231 | 13.21  | 10.39 | 4  | 6  | 491  | 54.5  | 8.29 |
| Q9Y315 | Deoxyribose-phosphate aldolase OS=Homo sapiens<br>GN=DERA<br>PE=1 SV=2 - [DEOC_HUMAN]              | 25.16 | 1 | 7  | 7  | 19 | 1.287 | 0.820 | 0.448 | 1.232 | 44.01  | 25.16 | 10 | 19 | 318  | 35.2  | 8.94 |
| P14316 | Interferon regulatory factor 2 OS=Homo sapiens<br>GN=IRF2 PE=1 SV=2 - [IRF2_HUMAN]                 | 5.16  | 1 | 1  | 1  | 1  | 1.166 | 0.868 | 0.619 | 1.232 | 2.02   | 5.16  | 1  | 1  | 349  | 39.3  | 7.52 |

|        |                                                                                                                        |       |   |   |    |    |       |       |       |       |       |       |    |    |     |      |       |
|--------|------------------------------------------------------------------------------------------------------------------------|-------|---|---|----|----|-------|-------|-------|-------|-------|-------|----|----|-----|------|-------|
| Q8NFH5 | Nudeoporphin<br>NUP53<br>OS=Homo sapiens<br>GN=NUP35<br>PE=1 SV=1 - [NUP53_HUMAN]                                      | 19.94 | 1 | 5 | 5  | 16 | 1.115 | 1.558 | 1.046 | 1.232 | 46.03 | 19.94 | 8  | 16 | 326 | 34.8 | 9.09  |
| Q9BVL4 | Selenoprotein O<br>OS=Homo sapiens<br>GN=SELO<br>PE=2 SV=3 - [SELO_HUMAN]                                              | 9.72  | 1 | 5 | 5  | 16 | 1.176 | 1.208 | 1.365 | 1.232 | 36.51 | 9.72  | 7  | 16 | 669 | 73.4 | 5.97  |
| P07992 | DNA excision repair protein ERCC-1<br>OS=Homo sapiens<br>GN=ERCC1<br>PE=1 SV=1 - [ERCC1_HUMAN]                         | 5.72  | 1 | 2 | 2  | 6  | 0.944 | 1.194 | 0.780 | 1.232 | 9.41  | 5.72  | 3  | 6  | 297 | 32.5 | 6.25  |
| Q01844 | RNA-binding protein EWS<br>OS=Homo sapiens<br>GN=EWSR1<br>PE=1 SV=1 - [EWS_HUMAN]                                      | 9.91  | 1 | 5 | 5  | 28 | 1.121 | 1.621 | 1.042 | 1.232 | 74.57 | 9.91  | 9  | 28 | 656 | 68.4 | 9.33  |
| Q96E11 | Ribosome-recycling factor, mitochondrial<br>OS=Homo sapiens<br>GN=MRRF<br>PE=1 SV=1 - [RRFM_HUMAN]                     | 18.32 | 1 | 4 | 4  | 14 | 1.858 | 1.338 | 0.925 | 1.232 | 32.88 | 18.32 | 7  | 14 | 262 | 29.3 | 9.79  |
| Q15717 | ELAV-like protein 1<br>OS=Homo sapiens<br>GN=ELAVL1<br>PE=1 SV=2 - [ELAV1_HUMAN]                                       | 33.13 | 2 | 9 | 10 | 43 | 1.059 | 1.300 | 1.061 | 1.232 | 99.16 | 33.13 | 19 | 43 | 326 | 36.1 | 9.17  |
| Q9BRT6 | Protein LLP homolog<br>OS=Homo sapiens<br>GN=LLPH PE=2 SV=1 - [LLPH_HUMAN]                                             | 12.40 | 1 | 1 | 1  | 17 | 1.007 | 1.221 | 1.073 | 1.232 | 54.28 | 12.40 | 2  | 17 | 129 | 15.2 | 10.37 |
| O43837 | Isocitrate dehydrogenase [NAD] subunit beta, mitochondrial<br>OS=Homo sapiens<br>GN=IDH3B<br>PE=1 SV=2 - [IDH3B_HUMAN] | 24.16 | 1 | 7 | 7  | 20 | 1.315 | 1.417 | 1.013 | 1.232 | 44.28 | 24.16 | 11 | 20 | 385 | 42.2 | 8.46  |
| A5D6W6 | Fat storage-inducing transmembrane protein 1<br>OS=Homo sapiens<br>GN=FITM1<br>PE=1 SV=1 - [FITM1_HUMAN]               | 12.33 | 1 | 2 | 2  | 2  | 2.296 | 0.804 | 0.879 | 1.233 | 2.70  | 12.33 | 2  | 2  | 292 | 32.2 | 9.79  |

|        |                                                                                                                                                                                                               |       |   |    |    |     |       |       |       |       |        |       |    |     |      |       |      |
|--------|---------------------------------------------------------------------------------------------------------------------------------------------------------------------------------------------------------------|-------|---|----|----|-----|-------|-------|-------|-------|--------|-------|----|-----|------|-------|------|
| Q7Z7K0 | COX assembly<br>mitochondrial<br>protein<br>homolog<br>OS=Homo<br>sapiens<br>GN=CMC1<br>PE=1 SV=1 -<br>[COXM1_HUMA<br>N]<br>Heterogeneous<br>nuclear<br>ribonucleoprot<br>ein R                               | 33.96 | 1 | 4  | 4  | 5   | 1.609 | 1.209 | 1.290 | 1.233 | 11.75  | 33.96 | 4  | 5   | 106  | 12.5  | 8.63 |
| O43390 | OS=Homo<br>sapiens<br>GN=HNRNPR<br>PE=1 SV=1 -<br>[HNRPR_HUMAN<br>U6 snRNA-<br>associated Sm-<br>like protein<br>LSM8                                                                                         | 43.76 | 2 | 19 | 27 | 124 | 1.082 | 1.390 | 0.986 | 1.233 | 311.18 | 43.76 | 45 | 124 | 633  | 70.9  | 8.13 |
| O95777 | OS=Homo<br>sapiens<br>GN=LSM8<br>PE=1 SV=3 -<br>[LSM8_HUMAN]                                                                                                                                                  | 59.38 | 1 | 4  | 4  | 10  | 0.909 | 1.094 | 0.715 | 1.233 | 27.39  | 59.38 | 8  | 10  | 96   | 10.4  | 4.48 |
| Q96EY7 | Pentatricopepti<br>de repeat<br>domain-<br>containing<br>protein 3,<br>mitochondrial<br>OS=Homo<br>sapiens<br>GN=PTCD3<br>PE=1 SV=3 -<br>[PTCD3_HUMAN<br>Coiled-coil<br>domain-<br>containing<br>protein 144A | 14.22 | 1 | 8  | 8  | 29  | 1.037 | 1.347 | 0.889 | 1.233 | 60.44  | 14.22 | 14 | 29  | 689  | 78.5  | 6.42 |
| A2RUR9 | OS=Homo<br>sapiens<br>GN=CCDC144A<br>PE=1 SV=1 -<br>[C144A_HUMAN<br>]                                                                                                                                         | 1.89  | 2 | 2  | 4  | 5   | 1.051 | 0.511 | 0.867 | 1.234 | 10.20  | 1.89  | 4  | 5   | 1427 | 165.0 | 5.36 |
| Q00978 | Interferon<br>regulatory<br>factor 9<br>OS=Homo<br>sapiens<br>GN=IRF9 PE=1<br>SV=1 -<br>[IRF9_HUMAN]                                                                                                          | 7.38  | 1 | 3  | 3  | 6   | 2.033 | 1.579 | 2.057 | 1.234 | 10.45  | 7.38  | 4  | 6   | 393  | 43.7  | 5.77 |
| P78562 | Phosphate-<br>regulating<br>neutral<br>endopeptidase<br>OS=Homo<br>sapiens<br>GN=PHEX<br>PE=1 SV=1 -<br>[PHEX_HUMAN]                                                                                          | 0.80  | 1 | 1  | 1  | 1   | 0.795 | 1.085 | 1.220 | 1.234 | 0.00   | 0.80  | 1  | 1   | 749  | 86.4  | 8.76 |
| Q9P013 | Spliceosome-<br>associated<br>protein CWC15<br>homolog<br>OS=Homo<br>sapiens<br>GN=CWC15<br>PE=1 SV=2 -<br>[CWC15_HUMA<br>N]                                                                                  | 8.30  | 1 | 3  | 3  | 9   | 1.126 | 1.263 | 1.059 | 1.234 | 20.91  | 8.30  | 4  | 9   | 229  | 26.6  | 5.71 |

|        |                                                                                                                                                                                                                                                                                                              |       |   |    |    |     |       |       |       |       |         |       |    |     |      |       |      |
|--------|--------------------------------------------------------------------------------------------------------------------------------------------------------------------------------------------------------------------------------------------------------------------------------------------------------------|-------|---|----|----|-----|-------|-------|-------|-------|---------|-------|----|-----|------|-------|------|
| Q75533 | Splicing factor<br>3B subunit 1<br>OS=Homo<br>sapiens<br>GN=SF3B1<br>PE=1 SV=3 -<br>[SF3B1_HUMAN<br>]<br>DNA<br>methyltransferase 1-<br>associated<br>protein 1<br>OS=Homo<br>sapiens<br>GN=DMAP1<br>PE=1 SV=1 -<br>[DMAP1_HUMA                                                                              | 31.29 | 1 | 37 | 37 | 124 | 1.070 | 1.273 | 1.105 | 1.234 | 367.52  | 31.29 | 53 | 124 | 1304 | 145.7 | 7.09 |
| Q9NPF5 | Caspase-4<br>OS=Homo<br>sapiens<br>GN=CASP4<br>PE=1 SV=1 -<br>[CASP4_HUMAN<br>]<br>Transmembran<br>e protein 161A<br>OS=Homo<br>sapiens<br>GN=TMEM161A<br>PE=2 SV=1 -<br>[T161A_HUMAN<br>]<br>Trace amine-<br>associated<br>receptor 1<br>OS=Homo<br>sapiens<br>GN=TAAR1<br>PE=1 SV=1 -<br>[TAAR1_HUMAN<br>] | 7.49  | 1 | 3  | 3  | 5   | 1.114 | 1.761 | 1.011 | 1.235 | 17.75   | 7.49  | 4  | 5   | 467  | 53.0  | 9.50 |
| P49662 | 60 kDa heat<br>shock protein,<br>mitochondrial<br>OS=Homo<br>sapiens<br>GN=HSPD1<br>PE=1 SV=2 -<br>[CH60_HUMAN]                                                                                                                                                                                              | 19.36 | 2 | 8  | 8  | 27  | 0.723 | 0.867 | 0.696 | 1.235 | 90.17   | 19.36 | 14 | 27  | 377  | 43.2  | 6.00 |
| Q9NX61 | Isocitrate<br>dehydrogenase<br>[NAD] subunit<br>gamma,<br>mitochondrial<br>OS=Homo<br>sapiens<br>GN=IDH3G<br>PE=1 SV=1 -<br>[IDH3G_HUMAN<br>]<br>NTF2-related<br>export protein<br>1 OS=Homo<br>sapiens<br>GN=NXT1<br>PE=1 SV=1 -<br>[NXT1_HUMAN]                                                            | 3.13  | 1 | 1  | 1  | 6   | 1.049 | 0.815 | 0.893 | 1.235 | 8.94    | 3.13  | 2  | 6   | 479  | 53.6  | 8.44 |
| Q96RJ0 | Ubiquitin<br>carboxyl-<br>terminal<br>hydrolase 28<br>OS=Homo<br>sapiens<br>GN=USP28<br>PE=1 SV=1 -<br>[UBP28_HUMAN<br>]                                                                                                                                                                                     | 2.36  | 1 | 1  | 1  | 1   | 1.323 | 1.086 | 1.010 | 1.235 | 2.19    | 2.36  | 1  | 1   | 339  | 39.1  | 8.70 |
| P10809 |                                                                                                                                                                                                                                                                                                              | 81.68 | 1 | 46 | 46 | 696 | 0.950 | 1.243 | 0.908 | 1.235 | 2024.67 | 81.68 | 77 | 696 | 573  | 61.0  | 5.87 |
| P51553 |                                                                                                                                                                                                                                                                                                              | 15.52 | 1 | 4  | 4  | 12  | 1.160 | 1.115 | 0.898 | 1.235 | 27.14   | 15.52 | 6  | 12  | 393  | 42.8  | 8.50 |
| Q9UKK6 |                                                                                                                                                                                                                                                                                                              | 5.71  | 2 | 1  | 1  | 1   | 0.957 | 1.127 | 1.602 | 1.235 | 0.00    | 5.71  | 1  | 1   | 140  | 15.8  | 5.03 |
| Q96RU2 |                                                                                                                                                                                                                                                                                                              | 1.39  | 1 | 1  | 1  | 1   | 1.859 | 1.944 | 1.332 | 1.235 | 2.20    | 1.39  | 1  | 1   | 1077 | 122.4 | 5.20 |

|        |                                                                                                                    |       |   |    |    |     |       |       |       |       |        |       |    |     |      |       |      |
|--------|--------------------------------------------------------------------------------------------------------------------|-------|---|----|----|-----|-------|-------|-------|-------|--------|-------|----|-----|------|-------|------|
| Q9NNW7 | Thioredoxin reductase 2, mitochondrial<br>OS=Homo sapiens<br>GN=TXNRD2<br>PE=1 SV=3 - [TRXR2_HUMAN]                | 8.21  | 1 | 5  | 5  | 32  | 1.326 | 1.260 | 1.183 | 1.235 | 76.31  | 8.21  | 9  | 32  | 524  | 56.5  | 7.50 |
| Q9BW91 | ADP-ribose pyrophosphatase, mitochondrial<br>OS=Homo sapiens<br>GN=NUDT9<br>PE=1 SV=1 - [NUDT9_HUMAN]              | 21.71 | 1 | 7  | 7  | 25  | 1.168 | 1.097 | 1.038 | 1.236 | 60.31  | 21.71 | 14 | 25  | 350  | 39.1  | 8.22 |
| P80723 | Brain adduct soluble protein 1<br>OS=Homo sapiens<br>GN=BASP1<br>PE=1 SV=2 - [BASP1_HUMAN]                         | 95.59 | 1 | 24 | 24 | 250 | 3.786 | 0.917 | 0.445 | 1.236 | 745.66 | 95.59 | 34 | 250 | 227  | 22.7  | 4.63 |
| Q15424 | Scaffold attachment factor B1<br>OS=Homo sapiens<br>GN=SAFB<br>PE=1 SV=4 - [SAFB1_HUMAN]                           | 17.05 | 1 | 9  | 16 | 43  | 0.945 | 1.180 | 0.915 | 1.236 | 102.54 | 17.05 | 23 | 43  | 915  | 102.6 | 5.47 |
| P50749 | Ras association domain-containing protein 2<br>OS=Homo sapiens<br>GN=RASSF2<br>PE=1 SV=1 - [RAS2_HUMAN]            | 17.18 | 1 | 5  | 5  | 20  | 1.057 | 0.806 | 1.020 | 1.236 | 44.31  | 17.18 | 8  | 20  | 326  | 37.8  | 8.84 |
| Q06203 | Amidophosphoribosyltransferase<br>OS=Homo sapiens<br>GN=PPAT<br>PE=1 SV=1 - [PUR1_HUMAN]                           | 16.63 | 1 | 7  | 7  | 19  | 0.589 | 1.030 | 0.694 | 1.236 | 33.81  | 16.63 | 12 | 19  | 517  | 57.4  | 6.76 |
| Q99575 | Ribonucleases P/MRP protein subunit POP1<br>OS=Homo sapiens<br>GN=POP1<br>PE=1 SV=2 - [POP1_HUMAN]                 | 12.89 | 1 | 9  | 9  | 21  | 0.953 | 1.042 | 1.188 | 1.236 | 59.55  | 12.89 | 12 | 21  | 1024 | 114.6 | 9.22 |
| Q96RN5 | Mediator of RNA polymerase II transcription subunit 15<br>OS=Homo sapiens<br>GN=MED15<br>PE=1 SV=2 - [MED15_HUMAN] | 6.60  | 1 | 4  | 4  | 11  | 1.137 | 1.034 | 1.089 | 1.236 | 21.54  | 6.60  | 6  | 11  | 788  | 86.7  | 9.42 |

|        |                                                                                                                             |       |   |    |    |    |       |       |       |       |       |       |    |    |      |       |      |
|--------|-----------------------------------------------------------------------------------------------------------------------------|-------|---|----|----|----|-------|-------|-------|-------|-------|-------|----|----|------|-------|------|
| Q16539 | Mitogen-activated protein kinase 14 OS=Homo sapiens<br>GN=MAPK14<br>PE=1 SV=3 - [MK14_HUMAN]                                | 33.89 | 3 | 10 | 11 | 37 | 1.199 | 1.530 | 1.282 | 1.236 | 91.91 | 33.89 | 18 | 37 | 360  | 41.3  | 5.78 |
| Q9P291 | Armadillo repeat-containing X-linked protein 1 OS=Homo sapiens<br>GN=ARMCX1<br>PE=1 SV=1 - [ARMX1_HUMAN]                    | 3.09  | 1 | 2  | 2  | 6  | 1.158 | 0.822 | 1.031 | 1.237 | 12.28 | 3.09  | 3  | 6  | 453  | 49.1  | 9.22 |
| Q9P2H5 | Ubiquitin carboxyl-terminal hydrolase 35 OS=Homo sapiens<br>GN=USP35<br>PE=1 SV=3 - [UBP35_HUMAN]                           | 2.26  | 1 | 1  | 2  | 4  | 1.514 | 0.942 | 0.962 | 1.237 | 0.00  | 2.26  | 2  | 4  | 1018 | 113.3 | 5.57 |
| O75880 | Protein SCO1 homolog, mitochondrial OS=Homo sapiens<br>GN=SCO1<br>PE=1 SV=1 - [SCO1_HUMAN]                                  | 19.93 | 1 | 4  | 4  | 9  | 0.842 | 1.005 | 1.399 | 1.237 | 17.99 | 19.93 | 5  | 9  | 301  | 33.8  | 8.88 |
| Q96P47 | Arf-GAP with GTPase, ANK repeat and PH domain-containing protein 3 OS=Homo sapiens<br>GN=AGAP3<br>PE=1 SV=2 - [AGAP3_HUMAN] | 5.14  | 2 | 2  | 5  | 8  | 0.975 | 1.165 | 1.576 | 1.237 | 15.20 | 5.14  | 6  | 8  | 875  | 95.0  | 7.97 |
| A6NCW7 | Inactive ubiquitin carboxyl-terminal hydrolase 17-like protein 4 OS=Homo sapiens<br>GN=USP17L4<br>PE=3 SV=3 - [UI7L4_HUMAN] | 4.34  | 4 | 1  | 2  | 3  | 1.145 | 0.885 | 1.236 | 1.237 | 4.78  | 4.34  | 2  | 3  | 530  | 59.6  | 7.42 |
| Q6IMI4 | Sulfotransferase 6B1 OS=Homo sapiens<br>GN=SULT6B1<br>PE=2 SV=2 - [ST6B1_HUMAN]                                             | 2.64  | 1 | 1  | 1  | 3  | 0.945 | 1.533 | 1.869 | 1.238 | 6.88  | 2.64  | 1  | 3  | 303  | 34.9  | 6.46 |
| Q92979 | Ribosomal RNA small subunit methyltransferase NEP1 OS=Homo sapiens<br>GN=EMG1<br>PE=1 SV=4 - [NEP1_HUMAN]                   | 4.51  | 1 | 1  | 1  | 4  | 0.963 | 0.673 | 0.807 | 1.238 | 5.09  | 4.51  | 2  | 4  | 244  | 26.7  | 9.17 |



|        |                                                                                                                      |       |   |    |    |     |       |       |       |       |        |       |    |     |      |       |       |
|--------|----------------------------------------------------------------------------------------------------------------------|-------|---|----|----|-----|-------|-------|-------|-------|--------|-------|----|-----|------|-------|-------|
| P22087 | rRNA 2'-O-methyltransferase fibrillar<br>OS=Homo sapiens<br>GN=FBL PE=1 SV=2 - [FBRL_HUMAN]                          | 35.20 | 1 | 12 | 13 | 48  | 1.111 | 1.315 | 1.022 | 1.238 | 105.54 | 35.20 | 21 | 48  | 321  | 33.8  | 10.18 |
| Q96T17 | MAP7 domain-containing protein 2<br>OS=Homo sapiens<br>GN=MAP7D2 PE=1 SV=2 - [MA7D2_HUMAN]                           | 6.15  | 1 | 3  | 3  | 6   | 1.488 | 0.640 | 1.080 | 1.238 | 13.85  | 6.15  | 3  | 6   | 732  | 81.9  | 8.84  |
| O14879 | Interferon-induced protein with tetratricopeptide repeats 3<br>OS=Homo sapiens<br>GN=IFIT3 PE=1 SV=1 - [IFIT3_HUMAN] | 31.84 | 2 | 14 | 15 | 41  | 5.915 | 1.176 | 1.925 | 1.238 | 105.95 | 31.84 | 22 | 41  | 490  | 55.9  | 5.20  |
| Q8N392 | Rho GTPase-activating protein 18<br>OS=Homo sapiens<br>GN=ARHGAP18 PE=1 SV=3 - [RHG18_HUMAN]                         | 18.10 | 1 | 10 | 11 | 30  | 1.459 | 0.932 | 1.248 | 1.238 | 75.97  | 18.10 | 18 | 30  | 663  | 74.9  | 6.44  |
| Q14527 | Helicase-like transcription factor<br>OS=Homo sapiens<br>GN=HLTF PE=1 SV=2 - [HLTF_HUMAN]                            | 2.08  | 1 | 3  | 3  | 6   | 0.877 | 1.210 | 1.165 | 1.238 | 10.44  | 2.08  | 4  | 6   | 1009 | 113.9 | 8.60  |
| O75175 | CCR4-NOT transcription complex subunit 3<br>OS=Homo sapiens<br>GN=CNOT3 PE=1 SV=1 - [CNOT3_HUMAN]                    | 12.08 | 1 | 10 | 10 | 18  | 0.903 | 1.206 | 1.020 | 1.239 | 37.28  | 12.08 | 13 | 18  | 753  | 81.8  | 6.20  |
| Q4L180 | Filamin A-interacting protein 1-like<br>OS=Homo sapiens<br>GN=FILIP1L PE=1 SV=2 - [FIL1L_HUMAN]                      | 39.30 | 2 | 45 | 45 | 159 | 2.263 | 0.486 | 1.482 | 1.239 | 358.19 | 39.30 | 62 | 159 | 1135 | 130.3 | 6.57  |
| O60235 | Transmembrane protease serine 11D<br>OS=Homo sapiens<br>GN=TMPRSS11D PE=1 SV=1 - [TM11D_HUMAN]                       | 3.11  | 1 | 1  | 1  | 1   | 0.899 | 0.205 | 0.325 | 1.239 | 2.02   | 3.11  | 1  | 1   | 418  | 46.2  | 8.38  |

|        |                                                                                                            |       |   |    |    |     |       |       |       |       |         |       |    |     |      |       |      |
|--------|------------------------------------------------------------------------------------------------------------|-------|---|----|----|-----|-------|-------|-------|-------|---------|-------|----|-----|------|-------|------|
| P25705 | ATP synthase subunit alpha, mitochondrial<br>OS=Homo sapiens<br>GN=ATP5A1<br>PE=1 SV=1 - [ATPA_HUMAN]      | 58.23 | 1 | 36 | 37 | 546 | 1.170 | 1.055 | 0.891 | 1.240 | 1357.11 | 58.23 | 64 | 546 | 553  | 59.7  | 9.13 |
| P29622 | Kallistatin<br>OS=Homo sapiens<br>GN=SERPINA4<br>PE=1 SV=3 - [KAIN_HUMAN]                                  | 2.81  | 1 | 1  | 1  | 1   | 1.064 | 1.606 | 1.363 | 1.240 | 2.63    | 2.81  | 1  | 1   | 427  | 48.5  | 7.75 |
| Q93009 | Ubiquitin carboxyl-terminal hydrolase 7<br>OS=Homo sapiens<br>GN=USP7<br>PE=1 SV=2 - [UBP7_HUMAN]          | 16.88 | 1 | 16 | 16 | 50  | 1.038 | 1.099 | 1.039 | 1.240 | 115.59  | 16.88 | 23 | 50  | 1102 | 128.2 | 5.55 |
| Q96CS2 | HAUS augmin-like complex subunit 1<br>OS=Homo sapiens<br>GN=HAUS1<br>PE=1 SV=1 - [HAUS1_HUMAN]             | 3.96  | 1 | 1  | 1  | 2   | 1.093 | 0.906 | 1.056 | 1.240 | 6.65    | 3.96  | 1  | 2   | 278  | 31.8  | 5.53 |
| O75351 | Vacuolar protein sorting-associated protein 4B<br>OS=Homo sapiens<br>GN=VPS4B<br>PE=1 SV=2 - [VPS4B_HUMAN] | 35.81 | 1 | 11 | 17 | 60  | 1.104 | 1.084 | 1.037 | 1.240 | 140.51  | 35.81 | 27 | 60  | 444  | 49.3  | 7.23 |
| Q7Z434 | Mitochondrial antiviral-signaling protein<br>OS=Homo sapiens<br>GN=MAVS<br>PE=1 SV=2 - [MAVS_HUMAN]        | 23.52 | 1 | 9  | 9  | 31  | 1.099 | 1.050 | 1.044 | 1.240 | 69.58   | 23.52 | 13 | 31  | 540  | 56.5  | 5.52 |
| Q92733 | Proline-rich protein PRCC<br>OS=Homo sapiens<br>GN=PRCC<br>PE=1 SV=1 - [PRCC_HUMAN]                        | 9.16  | 1 | 3  | 3  | 5   | 0.903 | 0.908 | 0.603 | 1.240 | 9.55    | 9.16  | 4  | 5   | 491  | 52.4  | 5.10 |
| P43121 | Cell surface glycoprotein MUC18<br>OS=Homo sapiens<br>GN=MCAM<br>PE=1 SV=2 - [MUC18_HUMAN]                 | 22.29 | 1 | 12 | 12 | 43  | 2.642 | 1.028 | 1.084 | 1.240 | 99.68   | 22.29 | 21 | 43  | 646  | 71.6  | 5.76 |
| Q6P587 | Acylpyruvase FAHD1, mitochondrial<br>OS=Homo sapiens<br>GN=FAHD1<br>PE=1 SV=2 - [FAHD1_HUMAN]              | 26.34 | 1 | 6  | 6  | 18  | 1.323 | 1.443 | 1.120 | 1.240 | 43.09   | 26.34 | 9  | 18  | 224  | 24.8  | 7.39 |

|        |                                                                                                                                               |       |   |    |    |    |       |       |       |       |       |       |    |    |      |       |       |
|--------|-----------------------------------------------------------------------------------------------------------------------------------------------|-------|---|----|----|----|-------|-------|-------|-------|-------|-------|----|----|------|-------|-------|
| Q96L91 | E1A-binding<br>protein p400<br>OS=Homo<br>sapiens<br>GN=EP400<br>PE=1 SV=4 -<br>[EP400_HUMAN<br>]                                             | 0.95  | 1 | 2  | 2  | 7  | 1.910 | 1.133 | 0.932 | 1.240 | 6.74  | 0.95  | 3  | 7  | 3159 | 343.3 | 9.19  |
| P49711 | Transcriptional<br>repressor CTCF<br>OS=Homo<br>sapiens<br>GN=CTCF<br>PE=1 SV=1 -<br>[CTCF_HUMAN]                                             | 5.91  | 2 | 5  | 5  | 8  | 1.004 | 1.097 | 0.866 | 1.241 | 4.73  | 5.91  | 5  | 8  | 727  | 82.7  | 6.96  |
| P18887 | DNA repair<br>protein XRCC1<br>OS=Homo<br>sapiens<br>GN=XRCC1<br>PE=1 SV=2 -<br>[XRCC1_HUMAN<br>]                                             | 19.91 | 1 | 10 | 10 | 24 | 1.120 | 1.267 | 1.065 | 1.241 | 44.72 | 19.91 | 16 | 24 | 633  | 69.4  | 6.39  |
| Q1X8D7 | Leucine-rich<br>repeat-<br>containing<br>protein 36<br>OS=Homo<br>sapiens<br>GN=LRR36<br>PE=2 SV=2 -<br>[LRC36_HUMAN<br>]                     | 1.46  | 1 | 1  | 1  | 1  | 1.420 | 0.881 | 1.017 | 1.241 | 3.01  | 1.46  | 1  | 1  | 754  | 83.8  | 7.15  |
| Q9ULE0 | Protein WWC3<br>OS=Homo<br>sapiens<br>GN=WWC3<br>PE=1 SV=3 -<br>[WWC3_HUMA<br>N]                                                              | 4.76  | 2 | 2  | 6  | 13 | 1.086 | 0.642 | 0.747 | 1.241 | 12.93 | 4.76  | 7  | 13 | 1092 | 122.6 | 6.37  |
| Q5VTL8 | Pre-mRNA-<br>splicing factor<br>38B OS=Homo<br>sapiens<br>GN=PRPF38B<br>PE=1 SV=1 -<br>[PR38B_HUMAN<br>]                                      | 4.95  | 1 | 4  | 4  | 7  | 1.094 | 0.997 | 0.962 | 1.241 | 11.72 | 4.95  | 5  | 7  | 546  | 64.4  | 10.54 |
| Q9H4Z3 | Phosphorylated<br>CTD-interacting<br>factor 1<br>OS=Homo<br>sapiens<br>GN=PCIF1<br>PE=1 SV=1 -<br>[PCIF1_HUMAN<br>]                           | 1.28  | 1 | 1  | 1  | 1  | 1.165 | 1.166 | 1.113 | 1.241 | 1.81  | 1.28  | 1  | 1  | 704  | 80.6  | 7.42  |
| Q96IK1 | Biorientation<br>of<br>chromosomes<br>in cell division<br>protein 1<br>OS=Homo<br>sapiens<br>GN=BOD1<br>PE=1 SV=2 -<br>[BOD1_HUMAN]           | 18.38 | 1 | 2  | 3  | 5  | 1.019 | 1.716 | 2.499 | 1.242 | 14.27 | 18.38 | 4  | 5  | 185  | 19.2  | 6.33  |
| Q9NWA1 | Ubiquinol-<br>cytochrome-c<br>reductase<br>complex<br>assembly factor<br>1 OS=Homo<br>sapiens<br>GN=UQCC1<br>PE=1 SV=3 -<br>[UQCC1_HUMA<br>N] | 12.37 | 1 | 3  | 3  | 11 | 1.057 | 1.124 | 1.110 | 1.242 | 28.85 | 12.37 | 4  | 11 | 299  | 34.6  | 8.91  |

|        |                                                                                                         |       |   |    |    |     |       |       |       |       |        |       |    |     |      |       |      |
|--------|---------------------------------------------------------------------------------------------------------|-------|---|----|----|-----|-------|-------|-------|-------|--------|-------|----|-----|------|-------|------|
| O43679 | LIM domain-binding protein<br>2 OS=Homo sapiens<br>GN=LDB2 PE=1 SV=1 - [LDB2_HUMAN]                     | 2.68  | 2 | 1  | 1  | 2   | 1.442 | 1.516 | 1.192 | 1.242 | 2.56   | 2.68  | 1  | 2   | 373  | 42.8  | 6.93 |
| Q13018 | Secretory phospholipase A2 receptor<br>OS=Homo sapiens<br>GN=PLA2R1 PE=1 SV=2 - [PLA2R_HUMAN]           | 0.89  | 1 | 1  | 2  | 3   | 0.633 | 0.746 | 1.269 | 1.242 | 9.32   | 0.89  | 2  | 3   | 1463 | 168.5 | 6.11 |
| P11498 | Pyruvate carboxylase, mitochondrial<br>OS=Homo sapiens GN=PC PE=1 SV=2 - [PYC_HUMAN]                    | 29.37 | 1 | 28 | 28 | 75  | 0.969 | 1.553 | 1.059 | 1.242 | 190.01 | 29.37 | 43 | 75  | 1178 | 129.6 | 6.84 |
| Q9NV06 | DDB1- and CUL4-associated factor 13<br>OS=Homo sapiens<br>GN=DCAF13 PE=1 SV=2 - [DCAF13_HUMAN]          | 9.44  | 1 | 5  | 5  | 10  | 1.052 | 1.067 | 1.264 | 1.243 | 17.00  | 9.44  | 9  | 10  | 445  | 51.4  | 9.19 |
| Q9UQR1 | Zinc finger protein 148<br>OS=Homo sapiens<br>GN=ZNF148 PE=1 SV=2 - [ZNF148_HUMAN]                      | 2.14  | 3 | 1  | 2  | 4   | 1.133 | 1.189 | 1.003 | 1.243 | 4.60   | 2.14  | 3  | 4   | 794  | 88.9  | 6.48 |
| Q9UNA4 | DNA polymerase iota<br>OS=Homo sapiens<br>GN=POLI PE=1 SV=3 - [POLI_HUMAN]                              | 2.03  | 1 | 1  | 2  | 2   | 1.062 | 0.978 | 1.320 | 1.243 | 5.16   | 2.03  | 2  | 2   | 740  | 83.0  | 6.07 |
| Q9UQE7 | Structural maintenance of chromosomes protein 3<br>OS=Homo sapiens<br>GN=SMC3 PE=1 SV=2 - [SMC3_HUMAN]  | 40.26 | 1 | 46 | 48 | 134 | 0.970 | 1.539 | 1.010 | 1.243 | 331.64 | 40.26 | 68 | 134 | 1217 | 141.5 | 7.18 |
| O43598 | 2'-deoxyribose 5'-phosphate N-hydrolase 1<br>OS=Homo sapiens<br>GN=DNPH1 PE=1 SV=1 - [DNPH1_HUMAN]      | 36.78 | 1 | 3  | 3  | 15  | 0.745 | 0.802 | 0.837 | 1.243 | 45.60  | 36.78 | 4  | 15  | 174  | 19.1  | 5.05 |
| Q96HD1 | Cysteine-rich with EGF-like domain protein 1<br>OS=Homo sapiens<br>GN=CRELD1 PE=1 SV=3 - [CRELD1_HUMAN] | 21.19 | 1 | 8  | 8  | 28  | 0.799 | 1.055 | 1.015 | 1.243 | 81.06  | 21.19 | 14 | 28  | 420  | 45.4  | 4.87 |

|        |                                                                                                                     |       |   |    |    |    |       |       |       |       |        |       |    |    |      |       |       |
|--------|---------------------------------------------------------------------------------------------------------------------|-------|---|----|----|----|-------|-------|-------|-------|--------|-------|----|----|------|-------|-------|
| Q13547 | Histone deacetylase 1<br>OS=Homo sapiens<br>GN=HDAC1<br>PE=1 SV=1 - [HDAC1_HUMAN]                                   | 17.63 | 1 | 3  | 7  | 24 | 1.238 | 1.510 | 0.788 | 1.243 | 34.02  | 17.63 | 11 | 24 | 482  | 55.1  | 5.48  |
| Q86TS9 | 39S ribosomal protein L52, mitochondrial<br>OS=Homo sapiens<br>GN=MRPL52<br>PE=2 SV=2 - [RMS2_HUMAN]                | 7.32  | 1 | 1  | 1  | 2  | 1.161 | 1.791 | 1.021 | 1.244 | 0.00   | 7.32  | 1  | 2  | 123  | 13.7  | 10.26 |
| P36954 | DNA-directed RNA polymerase II subunit RPB9<br>OS=Homo sapiens<br>GN=POLR2I<br>PE=1 SV=1 - [RPB9_HUMAN]             | 8.80  | 1 | 1  | 1  | 4  | 1.304 | 1.168 | 1.024 | 1.244 | 7.96   | 8.80  | 2  | 4  | 125  | 14.5  | 5.14  |
| P17152 | Transmembrane protein 11, mitochondrial<br>OS=Homo sapiens<br>GN=TMEM11<br>PE=1 SV=1 - [TMM11_HUMAN]                | 4.17  | 1 | 1  | 1  | 3  | 1.144 | 0.829 | 0.866 | 1.244 | 3.89   | 4.17  | 2  | 3  | 192  | 21.5  | 7.36  |
| Q562E7 | WD repeat-containing protein 81<br>OS=Homo sapiens<br>GN=WDR81<br>PE=1 SV=2 - [WDR81_HUMAN]                         | 3.30  | 1 | 4  | 4  | 5  | 1.429 | 1.680 | 1.257 | 1.244 | 9.18   | 3.30  | 5  | 5  | 1941 | 211.6 | 5.58  |
| O15067 | Phosphoribosylformylglycinamide synthase<br>OS=Homo sapiens<br>GN=PFAS<br>PE=1 SV=4 - [PUR4_HUMAN]                  | 18.01 | 1 | 17 | 18 | 61 | 1.059 | 1.227 | 0.909 | 1.244 | 155.46 | 18.01 | 30 | 61 | 1338 | 144.6 | 5.76  |
| Q9UKV3 | Apoptotic chromatin condensation inducer in the nucleus<br>OS=Homo sapiens<br>GN=ACIN1<br>PE=1 SV=2 - [ACINU_HUMAN] | 16.48 | 1 | 21 | 21 | 63 | 1.310 | 1.464 | 1.139 | 1.244 | 159.69 | 16.48 | 33 | 63 | 1341 | 151.8 | 6.43  |
| Q6RW13 | Type-1 angiotensin II receptor-associated protein<br>OS=Homo sapiens<br>GN=AGTRAP<br>PE=1 SV=1 - [ATRAP_HUMAN]      | 10.69 | 1 | 1  | 1  | 2  | 1.509 | 0.839 | 0.935 | 1.244 | 7.25   | 10.69 | 2  | 2  | 159  | 17.4  | 6.14  |

|        |                                                                                                                                               |       |   |    |    |    |       |       |       |       |       |       |    |    |      |       |      |
|--------|-----------------------------------------------------------------------------------------------------------------------------------------------|-------|---|----|----|----|-------|-------|-------|-------|-------|-------|----|----|------|-------|------|
| Q9Y2W2 | WW domain-binding protein<br>11 OS=Homo sapiens<br>GN=WBP11<br>PE=1 SV=1 - [WBP11_HUMAN]                                                      | 17.94 | 1 | 12 | 12 | 37 | 1.134 | 1.371 | 1.042 | 1.244 | 90.03 | 17.94 | 15 | 37 | 641  | 70.0  | 8.38 |
| P09001 | 39S ribosomal protein L3, mitochondrial<br>OS=Homo sapiens<br>GN=MRPL3<br>PE=1 SV=1 - [RM03_HUMAN]                                            | 7.47  | 1 | 2  | 2  | 5  | 1.043 | 1.471 | 1.091 | 1.244 | 13.67 | 7.47  | 4  | 5  | 348  | 38.6  | 9.48 |
| Q16540 | 39S ribosomal protein L23, mitochondrial<br>OS=Homo sapiens<br>GN=MRPL23<br>PE=1 SV=1 - [RM23_HUMAN]                                          | 9.80  | 1 | 1  | 1  | 3  | 0.849 | 1.067 | 0.920 | 1.244 | 9.61  | 9.80  | 2  | 3  | 153  | 17.8  | 9.69 |
| A8MVJ9 | Putative UPF0609 protein<br>C4orf27-like<br>OS=Homo sapiens<br>PE=3 SV=1 - [YI028_HUMAN]                                                      | 4.32  | 1 | 1  | 2  | 3  | 0.751 | 2.547 | 2.126 | 1.244 | 6.43  | 4.32  | 3  | 3  | 347  | 39.7  | 8.10 |
| Q9Y244 | Proteasome maturation protein<br>OS=Homo sapiens<br>GN=POMP<br>PE=1 SV=1 - [POMP_HUMAN]                                                       | 20.57 | 1 | 3  | 3  | 9  | 0.884 | 0.728 | 0.789 | 1.245 | 19.65 | 20.57 | 5  | 9  | 141  | 15.8  | 5.11 |
| P30154 | Serine/threonine-protein phosphatase 2A 65 kDa regulatory subunit A beta isoform<br>OS=Homo sapiens<br>GN=PPP2R1B<br>PE=1 SV=3 - [2AAB_HUMAN] | 12.31 | 1 | 2  | 7  | 31 | 0.734 | 1.091 | 1.137 | 1.245 | 78.57 | 12.31 | 11 | 31 | 601  | 66.2  | 4.94 |
| Q03188 | Centromere protein C<br>OS=Homo sapiens<br>GN=CENPC<br>PE=1 SV=2 - [CENPC_HUMAN]                                                              | 0.74  | 1 | 1  | 1  | 1  | 0.754 | 1.580 | 1.173 | 1.245 | 2.19  | 0.74  | 1  | 1  | 943  | 106.8 | 9.39 |
| Q6GYQ0 | Ral GTPase-activating protein subunit alpha-1<br>OS=Homo sapiens<br>GN=RALGAPA1<br>PE=1 SV=1 - [RGA1_HUMAN]                                   | 1.72  | 1 | 3  | 3  | 4  | 1.065 | 1.227 | 1.055 | 1.245 | 9.00  | 1.72  | 4  | 4  | 2036 | 229.7 | 6.19 |

|        |                                                                                                                          |       |   |    |    |    |       |       |       |       |        |       |    |    |      |       |      |
|--------|--------------------------------------------------------------------------------------------------------------------------|-------|---|----|----|----|-------|-------|-------|-------|--------|-------|----|----|------|-------|------|
| Q9BQG2 | Peroxisomal<br>NADH<br>pyrophosphatase<br>NUDT12<br>OS=Homo sapiens<br>GN=NUDT12<br>PE=1 SV=1 - [NUDT12_HUMAN]           | 1.73  | 1 | 1  | 1  | 2  | 1.303 | 1.379 | 0.741 | 1.245 | 2.12   | 1.73  | 2  | 2  | 462  | 52.0  | 6.83 |
| P42285 | Superkiller<br>viralidic activity<br>2-like 2<br>OS=Homo sapiens<br>GN=SKIV2L2<br>PE=1 SV=3 - [SK2L2_HUMAN]              | 13.24 | 1 | 14 | 14 | 39 | 0.980 | 1.126 | 0.850 | 1.245 | 85.30  | 13.24 | 20 | 39 | 1042 | 117.7 | 6.52 |
| Q9Y483 | Metal-response<br>element-binding<br>transcription<br>factor 2<br>OS=Homo sapiens<br>GN=MTF2<br>PE=1 SV=2 - [MTF2_HUMAN] | 1.35  | 1 | 1  | 1  | 1  | 1.560 | 0.191 | 0.510 | 1.245 | 2.12   | 1.35  | 1  | 1  | 593  | 67.1  | 8.72 |
| O60524 | Nuclear export<br>mediator<br>factor NEMF<br>OS=Homo sapiens<br>GN=NEMF<br>PE=1 SV=4 - [NEMF_HUMAN]                      | 12.64 | 1 | 14 | 14 | 58 | 1.005 | 0.996 | 1.012 | 1.246 | 122.28 | 12.64 | 20 | 58 | 1076 | 122.9 | 6.35 |
| P61326 | Protein mago<br>nashi homolog<br>OS=Homo sapiens<br>GN=MAGOH<br>PE=1 SV=1 - [MGN_HUMAN]                                  | 20.55 | 2 | 3  | 3  | 7  | 1.108 | 1.046 | 0.779 | 1.246 | 16.71  | 20.55 | 3  | 7  | 146  | 17.2  | 6.11 |
| Q9Y548 | Protein YIPF1<br>OS=Homo sapiens<br>GN=YIPF1<br>PE=2 SV=1 - [YIPF1_HUMAN]                                                | 2.94  | 1 | 1  | 1  | 2  | 1.505 | 0.818 | 0.901 | 1.246 | 4.80   | 2.94  | 2  | 2  | 306  | 34.3  | 5.31 |
| Q8IX11 | Mitochondrial<br>Rho GTPase 2<br>OS=Homo sapiens<br>GN=RHOT2<br>PE=1 SV=2 - [MIRO2_HUMAN]                                | 7.61  | 1 | 2  | 4  | 5  | 0.780 | 0.789 | 0.668 | 1.246 | 14.98  | 7.61  | 4  | 5  | 618  | 68.1  | 5.86 |
| Q9UIX3 | Anaphase-promoting<br>complex<br>subunit 7<br>OS=Homo sapiens<br>GN=ANAPC7<br>PE=1 SV=4 - [APC7_HUMAN]                   | 11.35 | 1 | 6  | 6  | 11 | 1.127 | 1.055 | 1.172 | 1.246 | 31.43  | 11.35 | 9  | 11 | 599  | 66.8  | 5.64 |
| Q9UK59 | Lariat<br>debranching<br>enzyme<br>OS=Homo sapiens<br>GN=DBR1<br>PE=1 SV=2 - [DBR1_HUMAN]                                | 2.02  | 1 | 1  | 1  | 4  | 1.611 | 1.302 | 1.099 | 1.246 | 5.25   | 2.02  | 2  | 4  | 544  | 61.5  | 5.47 |

|        |                                                                                                                                         |       |   |    |    |    |       |       |       |       |        |       |    |    |      |       |      |
|--------|-----------------------------------------------------------------------------------------------------------------------------------------|-------|---|----|----|----|-------|-------|-------|-------|--------|-------|----|----|------|-------|------|
| Q8WXE0 | Caskin-2<br>OS=Homo sapiens<br>GN=CASKIN2<br>PE=1 SV=2 - [CSK12_HUMAN]                                                                  | 5.16  | 1 | 3  | 4  | 12 | 0.902 | 1.146 | 1.373 | 1.247 | 47.27  | 5.16  | 6  | 12 | 1202 | 126.7 | 7.09 |
| Q9H147 | Deoxynucleotidyltransferase terminal-interacting protein 1<br>OS=Homo sapiens<br>GN=DNITIP1<br>PE=1 SV=2 - [TDIF1_HUMAN]                | 6.08  | 1 | 2  | 2  | 3  | 1.224 | 1.425 | 1.135 | 1.247 | 2.29   | 6.08  | 2  | 3  | 329  | 37.0  | 8.97 |
| Q9Y6D9 | Mitotic spindle assembly checkpoint protein MAD1<br>OS=Homo sapiens<br>GN=MAD1L1<br>PE=1 SV=2 - [MD1L1_HUMAN]                           | 19.36 | 1 | 12 | 12 | 28 | 1.204 | 1.251 | 1.046 | 1.247 | 71.12  | 19.36 | 17 | 28 | 718  | 83.0  | 5.92 |
| Q96D96 | Voltage-gated hydrogen channel 1<br>OS=Homo sapiens<br>GN=HVCN1<br>PE=1 SV=1 - [HVCN1_HUMAN]                                            | 5.49  | 1 | 1  | 1  | 2  | 0.890 | 1.109 | 1.419 | 1.247 | 5.44   | 5.49  | 2  | 2  | 273  | 31.7  | 6.80 |
| P51570 | Galactokinase<br>OS=Homo sapiens<br>GN=GALK1<br>PE=1 SV=1 - [GALK1_HUMAN]                                                               | 35.46 | 1 | 12 | 12 | 48 | 1.225 | 0.918 | 0.998 | 1.247 | 141.63 | 35.46 | 21 | 48 | 392  | 42.2  | 6.46 |
| O75027 | ATP-binding cassette sub-family B member 7, mitochondrial<br>OS=Homo sapiens<br>GN=ABCB7<br>PE=1 SV=2 - [ABCB7_HUMAN]                   | 5.05  | 1 | 4  | 4  | 5  | 0.764 | 1.358 | 1.002 | 1.247 | 9.87   | 5.05  | 4  | 5  | 752  | 82.6  | 9.33 |
| Q9NUW8 | Tyrosyl-DNA phosphodiesterase 1<br>OS=Homo sapiens<br>GN=TDP1<br>PE=1 SV=2 - [TYDP1_HUMAN]                                              | 3.78  | 1 | 2  | 2  | 3  | 0.865 | 1.675 | 1.420 | 1.247 | 3.40   | 3.78  | 3  | 3  | 608  | 68.4  | 7.65 |
| O43674 | NADH dehydrogenase [ubiquinone] 1 beta subcomplex subunit 5, mitochondrial<br>OS=Homo sapiens<br>GN=NDUFB5<br>PE=1 SV=1 - [NDUBS_HUMAN] | 23.28 | 1 | 5  | 5  | 15 | 0.828 | 0.846 | 0.780 | 1.247 | 30.36  | 23.28 | 8  | 15 | 189  | 21.7  | 9.63 |



|        |                                                                                                                  |       |   |    |    |     |       |       |       |       |        |       |    |     |      |       |      |
|--------|------------------------------------------------------------------------------------------------------------------|-------|---|----|----|-----|-------|-------|-------|-------|--------|-------|----|-----|------|-------|------|
| Q86X10 | Ral GTPase-activating protein subunit beta<br>OS=Homo sapiens<br>GN=RALGAPB<br>PE=1 SV=1 - [RLGPB_HUMAN]         | 1.41  | 1 | 3  | 3  | 6   | 1.090 | 1.302 | 1.051 | 1.248 | 12.18  | 1.41  | 3  | 6   | 1494 | 166.7 | 6.79 |
| Q9H0U3 | Magnesium transporter protein 1<br>OS=Homo sapiens<br>GN=MAGT1<br>PE=1 SV=1 - [MAGT1_HUMAN]                      | 15.52 | 1 | 6  | 7  | 20  | 1.004 | 1.019 | 0.753 | 1.248 | 47.47  | 15.52 | 11 | 20  | 335  | 38.0  | 9.63 |
| Q9Y4B5 | Microtubule cross-linking factor 1<br>OS=Homo sapiens<br>GN=MTCL1<br>PE=1 SV=5 - [MTCL1_HUMAN]                   | 12.86 | 1 | 17 | 20 | 36  | 1.040 | 1.221 | 1.256 | 1.248 | 80.91  | 12.86 | 29 | 36  | 1905 | 209.4 | 6.43 |
| Q96CB9 | 5-methylcytosine rRNA methyltransferase NSUN4<br>OS=Homo sapiens<br>GN=NSUN4<br>PE=1 SV=2 - [NSUN4_HUMAN]        | 5.73  | 1 | 2  | 2  | 4   | 1.019 | 1.078 | 0.858 | 1.248 | 10.80  | 5.73  | 4  | 4   | 384  | 43.1  | 8.18 |
| P23508 | Colorectal mutant cancer protein<br>OS=Homo sapiens<br>GN=MCC PE=1 SV=2 - [CRCM_HUMAN]                           | 9.89  | 1 | 7  | 7  | 15  | 1.276 | 1.225 | 0.756 | 1.248 | 32.48  | 9.89  | 10 | 15  | 829  | 93.0  | 5.52 |
| P55265 | Double-stranded RNA-specific adenosine deaminase<br>OS=Homo sapiens<br>GN=ADAR<br>PE=1 SV=4 - [DSRAD_HUMAN]      | 23.65 | 1 | 29 | 29 | 148 | 1.417 | 1.053 | 1.054 | 1.248 | 351.32 | 23.65 | 48 | 148 | 1226 | 136.0 | 8.65 |
| P83916 | Chromobox protein homolog 1<br>OS=Homo sapiens<br>GN=CBX1<br>PE=1 SV=1 - [CBX1_HUMAN]                            | 41.08 | 1 | 4  | 5  | 19  | 1.350 | 1.159 | 0.762 | 1.248 | 40.31  | 41.08 | 7  | 19  | 185  | 21.4  | 4.93 |
| Q7L2H7 | Eukaryotic translation initiation factor 3 subunit M<br>OS=Homo sapiens<br>GN=EIF3M<br>PE=1 SV=1 - [EIF3M_HUMAN] | 7.49  | 1 | 2  | 2  | 8   | 0.785 | 0.861 | 0.795 | 1.248 | 24.88  | 7.49  | 3  | 8   | 374  | 42.5  | 5.63 |

|        |                                                                                                                                                                                                                                                         |       |   |    |    |    |       |       |       |       |       |       |    |    |      |       |      |
|--------|---------------------------------------------------------------------------------------------------------------------------------------------------------------------------------------------------------------------------------------------------------|-------|---|----|----|----|-------|-------|-------|-------|-------|-------|----|----|------|-------|------|
| Q9P2G1 | Ankyrin repeat<br>and IBR<br>domain-<br>containing<br>protein 1<br>OS=Homo<br>sapiens<br>GN=ANKIB1<br>PE=1 SV=3 -<br>[AKIB1_HUMAN<br>Periodic<br>tryptophan<br>protein 1<br>homolog<br>OS=Homo<br>sapiens<br>GN=PWP1<br>PE=1 SV=1 -<br>[PWP1_HUMAN<br>] | 5.51  | 1 | 5  | 5  | 7  | 2.083 | 1.336 | 1.237 | 1.248 | 20.54 | 5.51  | 6  | 7  | 1089 | 121.9 | 5.11 |
| Q13610 | Serine/threoni<br>ne-protein<br>phosphatase<br>2A 56 kDa<br>regulatory<br>subunit alpha<br>isoform<br>OS=Homo<br>sapiens<br>GN=PPP2R5A<br>PE=1 SV=1 -<br>[2A5A_HUMAN]                                                                                   | 9.78  | 1 | 3  | 4  | 8  | 0.510 | 0.893 | 1.003 | 1.248 | 16.94 | 9.78  | 5  | 8  | 501  | 55.8  | 4.77 |
| Q15172 | Zinc finger<br>protein ZXDC<br>OS=Homo<br>sapiens<br>GN=ZXDC<br>PE=1 SV=2 -<br>[ZXDC_HUMAN]                                                                                                                                                             | 15.02 | 1 | 5  | 7  | 16 | 1.266 | 1.103 | 1.451 | 1.248 | 45.28 | 15.02 | 11 | 16 | 486  | 56.2  | 6.71 |
| Q2QGD7 | Calcium-binding<br>mitochondrial<br>carrier protein<br>Aralar2<br>OS=Homo<br>sapiens<br>GN=SLC25A13<br>PE=1 SV=2 -<br>[CMC2_HUMAN]                                                                                                                      | 1.86  | 1 | 2  | 2  | 5  | 1.364 | 0.919 | 1.098 | 1.249 | 11.57 | 1.86  | 2  | 5  | 858  | 89.9  | 8.13 |
| Q9UJ50 | Alpha-1,6-<br>mannosylglycop<br>rotein 6-beta-<br>N-<br>acetylglucosami<br>nyltransferase<br>A OS=Homo<br>sapiens<br>GN=MGAT5<br>PE=1 SV=1 -<br>[MGT5A_HUMA<br>N]                                                                                       | 22.96 | 1 | 8  | 12 | 32 | 1.320 | 0.947 | 0.839 | 1.249 | 70.04 | 22.96 | 17 | 32 | 675  | 74.1  | 8.62 |
| Q09328 | Serine/threoni<br>ne-protein<br>kinase VRK1<br>OS=Homo<br>sapiens<br>GN=VRK1<br>PE=1 SV=1 -<br>[VRK1_HUMAN]                                                                                                                                             | 14.71 | 1 | 10 | 10 | 23 | 2.020 | 0.504 | 0.998 | 1.249 | 40.28 | 14.71 | 15 | 23 | 741  | 84.5  | 8.12 |
| Q99986 |                                                                                                                                                                                                                                                         | 7.07  | 1 | 3  | 3  | 4  | 1.216 | 1.382 | 0.938 | 1.249 | 12.37 | 7.07  | 4  | 4  | 396  | 45.4  | 8.91 |

|        |                                                                                                                            |       |   |    |    |    |       |       |       |       |        |       |    |    |      |       |       |
|--------|----------------------------------------------------------------------------------------------------------------------------|-------|---|----|----|----|-------|-------|-------|-------|--------|-------|----|----|------|-------|-------|
| Q969U6 | F-box/WD repeat-containing protein 5<br>OS=Homo sapiens<br>GN=FBXW5<br>PE=1 SV=1 - [FBXW5_HUMAN]                           | 2.65  | 1 | 1  | 1  | 1  | 0.832 | 0.779 | 1.617 | 1.249 | 0.00   | 2.65  | 1  | 1  | 566  | 63.9  | 6.33  |
| Q9BRG1 | Vacuolar protein-sorting-associated protein 25<br>OS=Homo sapiens<br>GN=VPS25<br>PE=1 SV=1 - [VPS25_HUMAN]                 | 25.00 | 1 | 5  | 5  | 18 | 0.950 | 1.116 | 1.002 | 1.249 | 31.73  | 25.00 | 7  | 18 | 176  | 20.7  | 6.34  |
| Q12972 | Nuclear inhibitor of protein phosphatase 1<br>OS=Homo sapiens<br>GN=PPP1R8<br>PE=1 SV=2 - [PP1R8_HUMAN]                    | 33.33 | 1 | 9  | 9  | 22 | 0.966 | 1.131 | 1.017 | 1.249 | 58.99  | 33.33 | 15 | 22 | 351  | 38.5  | 7.37  |
| Q9Y5L4 | Mitochondrial import inner membrane translocase subunit Tim13<br>OS=Homo sapiens<br>GN=TIMM13<br>PE=1 SV=1 - [TIM13_HUMAN] | 27.37 | 1 | 2  | 2  | 12 | 0.932 | 1.108 | 0.747 | 1.249 | 16.63  | 27.37 | 3  | 12 | 95   | 10.5  | 8.18  |
| P10253 | Lysosomal alpha-glucosidase<br>OS=Homo sapiens<br>GN=GAA PE=1 SV=4 - [LYAG_HUMAN]                                          | 24.05 | 1 | 17 | 17 | 82 | 0.913 | 1.066 | 0.884 | 1.249 | 213.76 | 24.05 | 27 | 82 | 952  | 105.3 | 6.00  |
| Q8NBF6 | Late secretory pathway protein AV19 homolog<br>OS=Homo sapiens<br>GN=AV19 PE=1 SV=1 - [AV19_HUMAN]                         | 8.02  | 1 | 5  | 5  | 10 | 0.924 | 0.908 | 0.869 | 1.249 | 18.93  | 8.02  | 8  | 10 | 648  | 71.9  | 6.21  |
| O43861 | Probable phospholipid-transporting ATPase IIB<br>OS=Homo sapiens<br>GN=ATP9B<br>PE=2 SV=4 - [ATP9B_HUMAN]                  | 5.41  | 1 | 4  | 4  | 12 | 1.230 | 0.902 | 1.120 | 1.250 | 21.78  | 5.41  | 7  | 12 | 1147 | 129.2 | 7.61  |
| Q9GZT3 | SRA stem-loop-interacting RNA-binding protein, mitochondrial<br>OS=Homo sapiens<br>GN=SLIRP<br>PE=1 SV=1 - [SLIRP_HUMAN]   | 52.29 | 1 | 5  | 5  | 21 | 0.903 | 0.813 | 1.119 | 1.250 | 49.92  | 52.29 | 9  | 21 | 109  | 12.3  | 10.24 |

|        |                                                                                                                                                                           |       |   |    |    |    |       |       |       |       |        |       |    |    |      |       |       |
|--------|---------------------------------------------------------------------------------------------------------------------------------------------------------------------------|-------|---|----|----|----|-------|-------|-------|-------|--------|-------|----|----|------|-------|-------|
| Q9UBH6 | Xenotropic and polytropic retrovirus receptor 1<br>OS=Homo sapiens<br>GN=XPR1<br>PE=1 SV=1 - [XPR1_HUMAN]                                                                 | 5.75  | 1 | 3  | 3  | 7  | 1.193 | 0.792 | 0.969 | 1.250 | 12.45  | 5.75  | 5  | 7  | 696  | 81.5  | 8.44  |
| Q9HAN9 | Nicotinamide mononucleotide adenylyltransferase 1<br>OS=Homo sapiens<br>GN=NMNAT1<br>PE=1 SV=1 - [NMNAT1_HUMAN]<br>Pre-mRNA-splicing factor<br>ATP-dependent RNA helicase | 12.90 | 1 | 3  | 4  | 10 | 0.946 | 1.252 | 0.910 | 1.250 | 14.80  | 12.90 | 6  | 10 | 279  | 31.9  | 8.87  |
| Q92620 | PRP16<br>OS=Homo sapiens<br>GN=DHX38<br>PE=1 SV=2 - [PRP16_HUMAN]                                                                                                         | 6.03  | 1 | 6  | 6  | 15 | 1.000 | 1.029 | 1.006 | 1.250 | 20.81  | 6.03  | 10 | 15 | 1227 | 140.4 | 6.54  |
| P82664 | 28S ribosomal protein S10, mitochondrial<br>OS=Homo sapiens<br>GN=MRPS10<br>PE=1 SV=2 - [RT10_HUMAN]                                                                      | 14.93 | 1 | 2  | 2  | 6  | 0.729 | 1.556 | 1.141 | 1.250 | 19.02  | 14.93 | 3  | 6  | 201  | 23.0  | 8.00  |
| Q9NR30 | Nucleolar RNA helicase 2<br>OS=Homo sapiens<br>GN=DDX21<br>PE=1 SV=5 - [DDX21_HUMAN]                                                                                      | 23.88 | 1 | 15 | 18 | 55 | 0.724 | 0.751 | 0.726 | 1.251 | 120.09 | 23.88 | 28 | 55 | 783  | 87.3  | 9.28  |
| O00264 | Membrane-associated progesterone receptor component 1<br>OS=Homo sapiens<br>GN=PGRMC1<br>PE=1 SV=3 - [PGRMC1_HUMAN]                                                       | 52.31 | 1 | 9  | 11 | 68 | 1.031 | 0.891 | 1.054 | 1.251 | 172.72 | 52.31 | 18 | 68 | 195  | 21.7  | 4.70  |
| P48047 | ATP synthase subunit O, mitochondrial<br>OS=Homo sapiens<br>GN=ATP5O<br>PE=1 SV=1 - [ATPO_HUMAN]                                                                          | 46.48 | 3 | 10 | 10 | 54 | 1.254 | 1.158 | 0.920 | 1.251 | 111.67 | 46.48 | 16 | 54 | 213  | 23.3  | 9.96  |
| Q13243 | Serine/arginine-rich splicing factor 5<br>OS=Homo sapiens<br>GN=SRSF5<br>PE=1 SV=1 - [SRSF5_HUMAN]                                                                        | 13.97 | 1 | 2  | 3  | 22 | 1.132 | 1.622 | 1.156 | 1.251 | 53.98  | 13.97 | 6  | 22 | 272  | 31.2  | 11.59 |

|        |                                                                                                             |       |   |    |    |     |       |       |       |       |         |       |    |     |      |       |      |
|--------|-------------------------------------------------------------------------------------------------------------|-------|---|----|----|-----|-------|-------|-------|-------|---------|-------|----|-----|------|-------|------|
| P51159 | Ras-related protein Rab-27A OS=Homo sapiens<br>GN=RAB27A<br>PE=1 SV=3 - [RB27A_HUMAN]                       | 10.86 | 1 | 2  | 2  | 7   | 1.129 | 1.514 | 0.837 | 1.251 | 12.39   | 10.86 | 4  | 7   | 221  | 24.9  | 5.22 |
| Q12769 | Nuclear pore complex protein Nup160 OS=Homo sapiens<br>GN=NUP160<br>PE=1 SV=3 - [NU160_HUMAN]               | 2.79  | 1 | 4  | 4  | 9   | 0.913 | 0.982 | 1.006 | 1.251 | 13.26   | 2.79  | 7  | 9   | 1436 | 162.0 | 5.50 |
| P14778 | Interleukin-1 receptor type 1 OS=Homo sapiens<br>GN=IL1R1<br>PE=1 SV=1 - [IL1R1_HUMAN]                      | 1.58  | 1 | 1  | 1  | 3   | 0.943 | 1.003 | 1.686 | 1.252 | 4.87    | 1.58  | 2  | 3   | 569  | 65.4  | 7.83 |
| P08107 | Heat shock 70 kDa protein 1A/1B OS=Homo sapiens<br>GN=HSPA1A<br>PE=1 SV=5 - [HSP71_HUMAN]                   | 58.81 | 2 | 20 | 36 | 824 | 1.405 | 1.291 | 1.192 | 1.252 | 1808.32 | 58.81 | 65 | 824 | 641  | 70.0  | 5.66 |
| P13010 | X-ray repair cross-complementing protein 5 OS=Homo sapiens<br>GN=XRCC5<br>PE=1 SV=3 - [XRCC5_HUMAN]         | 54.37 | 1 | 33 | 34 | 184 | 1.171 | 1.116 | 0.878 | 1.253 | 457.18  | 54.37 | 55 | 184 | 732  | 82.7  | 5.81 |
| Q8NFD5 | AT-rich interactive domain-containing protein 1B OS=Homo sapiens<br>GN=ARID1B<br>PE=1 SV=2 - [ARI1B_HUMAN]  | 6.89  | 1 | 10 | 11 | 30  | 1.035 | 1.521 | 1.249 | 1.253 | 86.91   | 6.89  | 15 | 30  | 2236 | 236.0 | 6.73 |
| O75865 | Trafficking protein particle complex subunit 6A OS=Homo sapiens<br>GN=TRAPPC6A<br>PE=1 SV=2 - [TPC6A_HUMAN] | 9.43  | 1 | 2  | 2  | 4   | 0.957 | 1.101 | 1.268 | 1.253 | 8.10    | 9.43  | 3  | 4   | 159  | 17.6  | 5.26 |
| P55082 | Microfibril-associated glycoprotein 3 OS=Homo sapiens<br>GN=MFAP3<br>PE=2 SV=1 - [MFAP3_HUMAN]              | 1.66  | 2 | 1  | 1  | 1   | 1.053 | 0.724 | 0.818 | 1.254 | 1.64    | 1.66  | 1  | 1   | 362  | 40.1  | 5.00 |

|        |                                                                                                                       |       |   |    |    |     |       |       |       |       |        |       |    |     |      |       |       |
|--------|-----------------------------------------------------------------------------------------------------------------------|-------|---|----|----|-----|-------|-------|-------|-------|--------|-------|----|-----|------|-------|-------|
| P17096 | High mobility group protein HMG-1/HMG-Y<br>OS=Homo sapiens<br>GN=HMGA1<br>PE=1 SV=3 - [HMGA1_HUMAN]                   | 38.32 | 1 | 6  | 6  | 38  | 0.882 | 2.539 | 3.226 | 1.254 | 86.59  | 38.32 | 11 | 38  | 107  | 11.7  | 10.32 |
| Q8WXF1 | Paraspeckle component 1<br>OS=Homo sapiens<br>GN=PSPC1<br>PE=1 SV=1 - [PSPC1_HUMAN]                                   | 23.14 | 1 | 13 | 14 | 83  | 1.088 | 1.314 | 0.988 | 1.254 | 184.16 | 23.14 | 26 | 83  | 523  | 58.7  | 6.67  |
| O75155 | Cullin-associated NEDD8-dissodated protein 2<br>OS=Homo sapiens<br>GN=CAND2<br>PE=1 SV=3 - [CAND2_HUMAN]              | 6.39  | 1 | 3  | 8  | 24  | 0.898 | 1.924 | 1.765 | 1.254 | 44.53  | 6.39  | 12 | 24  | 1236 | 135.2 | 5.68  |
| Q86UU0 | B-cell CLL/lymphoma 9-like protein<br>OS=Homo sapiens<br>GN=BCL9L<br>PE=1 SV=1 - [BCL9L_HUMAN]                        | 7.20  | 1 | 9  | 10 | 24  | 0.819 | 1.143 | 0.962 | 1.254 | 47.24  | 7.20  | 14 | 24  | 1499 | 157.0 | 8.63  |
| Q13123 | Protein Red<br>OS=Homo sapiens GN=IK<br>PE=1 SV=3 - [RED_HUMAN]                                                       | 20.65 | 1 | 11 | 11 | 29  | 1.225 | 1.353 | 1.131 | 1.254 | 62.58  | 20.65 | 13 | 29  | 557  | 65.6  | 6.64  |
| Q9UBT2 | SUMO-activating enzyme subunit 2<br>OS=Homo sapiens<br>GN=UBA2<br>PE=1 SV=2 - [SAE2_HUMAN]                            | 35.16 | 1 | 19 | 19 | 59  | 1.023 | 1.071 | 0.893 | 1.254 | 154.63 | 35.16 | 31 | 59  | 640  | 71.2  | 5.29  |
| Q96AE4 | Far upstream element-binding protein 1<br>OS=Homo sapiens<br>GN=FUBP1<br>PE=1 SV=3 - [FUBP1_HUMAN]                    | 38.20 | 1 | 19 | 24 | 111 | 1.118 | 1.456 | 0.941 | 1.255 | 237.98 | 38.20 | 37 | 111 | 644  | 67.5  | 7.61  |
| Q9NYB0 | Telomeric repeat-binding factor 2-interacting protein 1<br>OS=Homo sapiens<br>GN=TERF2IP<br>PE=1 SV=1 - [TE2IP_HUMAN] | 26.82 | 1 | 9  | 9  | 16  | 0.973 | 1.327 | 1.028 | 1.255 | 27.77  | 26.82 | 11 | 16  | 399  | 44.2  | 4.73  |
| Q9H9S4 | Calcium-binding protein 39-like<br>OS=Homo sapiens<br>GN=CAB39L<br>PE=1 SV=3 - [CB39L_HUMAN]                          | 21.07 | 1 | 6  | 7  | 23  | 1.248 | 0.881 | 1.089 | 1.255 | 35.40  | 21.07 | 10 | 23  | 337  | 39.1  | 8.40  |

|        |                                                                                                                          |       |   |    |    |    |       |       |       |       |       |       |    |      |       |       |      |
|--------|--------------------------------------------------------------------------------------------------------------------------|-------|---|----|----|----|-------|-------|-------|-------|-------|-------|----|------|-------|-------|------|
| Q5W0Q7 | SUMO-specific isopeptidase<br>USPL1<br>OS=Homo sapiens<br>GN=USPL1<br>PE=1 SV=1 - [USPL1_HUMAN]                          | 1.37  | 1 | 1  | 1  | 1  | 0.841 | 0.858 | 1.255 | 3.27  | 1.37  | 1     | 1  | 1092 | 120.4 | 6.19  |      |
| Q8IVS2 | Malonyl-CoA-acyl carrier protein transacylase, mitochondrial<br>OS=Homo sapiens<br>GN=MCAT<br>PE=1 SV=2 - [FABD_HUMAN]   | 16.67 | 1 | 4  | 4  | 10 | 1.447 | 1.380 | 1.269 | 1.255 | 21.24 | 16.67 | 5  | 10   | 390   | 42.9  | 8.72 |
| Q8N5A5 | Zinc finger CCHH-type with G patch domain-containing protein<br>OS=Homo sapiens<br>GN=ZGPAT<br>PE=1 SV=3 - [ZGPAT_HUMAN] | 1.69  | 1 | 1  | 1  | 1  | 1.015 | 1.040 | 0.603 | 1.256 | 0.00  | 1.69  | 1  | 1    | 531   | 57.3  | 5.43 |
| P17612 | cAMP-dependent protein kinase catalytic subunit alpha<br>OS=Homo sapiens<br>GN=PRKACA<br>PE=1 SV=2 - [KAPCA_HUMAN]       | 22.51 | 2 | 3  | 13 | 37 | 1.757 | 1.355 | 1.202 | 1.256 | 83.81 | 22.51 | 18 | 37   | 351   | 40.6  | 8.79 |
| Q2M3C7 | A-kinase anchor protein SPHKAP<br>OS=Homo sapiens<br>GN=SPHKAP<br>PE=1 SV=1 - [SPKAP_HUMAN]                              | 0.47  | 1 | 1  | 1  | 1  | 2.259 | 0.434 | 1.218 | 1.256 | 2.44  | 0.47  | 1  | 1    | 1700  | 186.3 | 5.14 |
| Q8N878 | FERM domain-containing protein 1<br>OS=Homo sapiens<br>GN=FRMD1<br>PE=2 SV=2 - [FRMD1_HUMAN]                             | 4.92  | 1 | 2  | 3  | 4  | 0.327 | 0.971 | 0.931 | 1.256 | 8.41  | 4.92  | 3  | 4    | 549   | 62.5  | 8.21 |
| P28290 | Sperm-specific antigen 2<br>OS=Homo sapiens<br>GN=SSFA2<br>PE=1 SV=3 - [SSFA2_HUMAN]                                     | 13.11 | 1 | 14 | 14 | 42 | 1.925 | 0.894 | 0.693 | 1.256 | 98.30 | 13.11 | 20 | 42   | 1259  | 138.3 | 5.19 |
| Q9HCN8 | Stromal cell-derived factor 2-like protein 1<br>OS=Homo sapiens<br>GN=SDF2L1<br>PE=1 SV=2 - [SDF2L_HUMAN]                | 12.67 | 1 | 2  | 2  | 3  | 0.948 | 1.012 | 1.134 | 1.257 | 6.62  | 12.67 | 3  | 3    | 221   | 23.6  | 7.03 |

|        |                                                                                                                                 |       |   |    |    |    |       |       |       |       |        |       |    |    |      |       |      |
|--------|---------------------------------------------------------------------------------------------------------------------------------|-------|---|----|----|----|-------|-------|-------|-------|--------|-------|----|----|------|-------|------|
| Q13217 | DnaJ homolog subfamily C member 3<br>OS=Homo sapiens<br>GN=DNAJC3<br>PE=1 SV=1 - [DNAJC3_HUMAN]                                 | 44.25 | 1 | 21 | 22 | 94 | 1.134 | 0.904 | 0.880 | 1.257 | 155.59 | 44.25 | 33 | 94 | 504  | 57.5  | 6.15 |
| Q03111 | Protein ENL<br>OS=Homo sapiens<br>GN=MLLT1<br>PE=1 SV=2 - [ENL_HUMAN]                                                           | 6.44  | 1 | 3  | 3  | 8  | 0.863 | 1.526 | 1.189 | 1.257 | 20.15  | 6.44  | 5  | 8  | 559  | 62.0  | 8.59 |
| Q9BXJ8 | Transmembrane protein 120A<br>OS=Homo sapiens<br>GN=TMEM120A<br>PE=2 SV=1 - [T120A_HUMAN]                                       | 4.96  | 1 | 2  | 2  | 3  | 1.527 | 0.927 | 0.977 | 1.257 | 2.36   | 4.96  | 3  | 3  | 343  | 40.6  | 8.98 |
| O43819 | Protein SCO2 homolog, mitochondrial<br>OS=Homo sapiens<br>GN=SCO2<br>PE=1 SV=3 - [SCO2_HUMAN]                                   | 6.39  | 1 | 2  | 2  | 7  | 1.337 | 0.961 | 0.981 | 1.257 | 17.72  | 6.39  | 4  | 7  | 266  | 29.8  | 8.85 |
| O00623 | Peroxisome assembly protein 12<br>OS=Homo sapiens<br>GN=PEX12<br>PE=1 SV=1 - [PEX12_HUMAN]                                      | 4.74  | 1 | 2  | 2  | 4  | 0.787 | 1.175 | 1.074 | 1.257 | 4.33   | 4.74  | 3  | 4  | 359  | 40.8  | 9.11 |
| Q7Z553 | MAM domain-containing glycosylphosphatidylinositol anchor protein 2<br>OS=Homo sapiens<br>GN=MDGA2<br>PE=1 SV=2 - [MDGA2_HUMAN] | 1.67  | 1 | 1  | 1  | 1  | 1.272 | 1.772 | 1.140 | 1.258 | 2.83   | 1.67  | 1  | 1  | 956  | 107.4 | 7.20 |
| Q8N302 | Angiogenic factor with G patch and FHA domains 1<br>OS=Homo sapiens<br>GN=AGGF1<br>PE=1 SV=2 - [AGGF1_HUMAN]                    | 1.54  | 1 | 1  | 1  | 2  | 0.968 | 0.790 | 0.640 | 1.258 | 6.38   | 1.54  | 1  | 2  | 714  | 80.9  | 5.44 |
| Q7Z5J4 | Retinoic acid-induced protein 1<br>OS=Homo sapiens<br>GN=RAI1<br>PE=1 SV=2 - [RAI1_HUMAN]                                       | 1.52  | 1 | 3  | 3  | 4  | 1.236 | 1.330 | 1.097 | 1.258 | 5.44   | 1.52  | 4  | 4  | 1906 | 203.2 | 8.79 |
| P05165 | Propionyl-CoA carboxylase alpha chain, mitochondrial<br>OS=Homo sapiens<br>GN=PCCA<br>PE=1 SV=4 - [PCCA_HUMAN]                  | 23.76 | 1 | 16 | 16 | 50 | 1.041 | 1.382 | 1.262 | 1.258 | 139.59 | 23.76 | 24 | 50 | 728  | 80.0  | 7.52 |



|        |                                                                                                                                        |       |   |    |    |    |       |       |       |       |        |       |    |    |      |       |      |
|--------|----------------------------------------------------------------------------------------------------------------------------------------|-------|---|----|----|----|-------|-------|-------|-------|--------|-------|----|----|------|-------|------|
| Q99650 | Oncostatin-M-specific receptor subunit beta<br>OS=Homo sapiens<br>GN=OSMR<br>PE=1 SV=1 - [OSMR_HUMAN<br>Replication factor C subunit 5 | 1.33  | 1 | 1  | 1  | 2  | 1.010 | 1.362 | 1.838 | 1.258 | 0.00   | 1.33  | 1  | 2  | 979  | 110.4 | 5.82 |
| P40937 | OS=Homo sapiens<br>GN=RFC5<br>PE=1 SV=1 - [RFC5_HUMAN]<br>PDZ domain-containing protein 2                                              | 12.35 | 1 | 2  | 3  | 7  | 0.923 | 1.232 | 0.753 | 1.259 | 16.37  | 12.35 | 4  | 7  | 340  | 38.5  | 7.20 |
| O15018 | OS=Homo sapiens<br>GN=PDZD2<br>PE=1 SV=4 - [PDZD2_HUMAN]<br>Methyltransferase-like protein 6                                           | 0.63  | 3 | 2  | 2  | 2  | 1.042 | 1.149 | 1.743 | 1.259 | 2.67   | 0.63  | 2  | 2  | 2839 | 301.5 | 7.43 |
| Q8TCB7 | OS=Homo sapiens<br>GN=METTL6<br>PE=2 SV=2 - [METL6_HUMAN]<br>Sideroflexin-4                                                            | 2.11  | 1 | 1  | 1  | 1  | 1.323 | 1.274 | 1.765 | 1.259 | 1.62   | 2.11  | 1  | 1  | 284  | 33.2  | 6.19 |
| Q6P4A7 | OS=Homo sapiens<br>GN=SFXN4<br>PE=1 SV=1 - [SFXN4_HUMAN]<br>Probable ATP-dependent RNA helicase                                        | 4.15  | 1 | 1  | 1  | 2  | 0.891 | 1.329 | 1.195 | 1.259 | 3.71   | 4.15  | 2  | 2  | 337  | 38.0  | 9.19 |
| Q9BUQ8 | OS=Homo sapiens<br>GN=DDX23<br>PE=1 SV=3 - [DDX23_HUMAN]<br>Sjogren syndrome/scleroderma autoantigen 1                                 | 18.78 | 1 | 14 | 15 | 38 | 1.112 | 1.005 | 0.887 | 1.260 | 99.36  | 18.78 | 22 | 38 | 820  | 95.5  | 9.55 |
| O60232 | OS=Homo sapiens<br>GN=SSSCA1<br>PE=1 SV=1 - [SSA27_HUMAN]<br>Protein ZGRF1                                                             | 7.54  | 1 | 2  | 2  | 5  | 0.760 | 1.134 | 1.178 | 1.260 | 10.51  | 7.54  | 3  | 5  | 199  | 21.5  | 5.24 |
| Q86YA3 | OS=Homo sapiens<br>GN=ZGRF1<br>PE=2 SV=3 - [ZGRF1_HUMAN]<br>Regulator of chromosome condensation                                       | 1.85  | 1 | 2  | 3  | 5  | 1.678 | 0.958 | 0.843 | 1.260 | 0.00   | 1.85  | 3  | 5  | 2104 | 236.5 | 6.16 |
| P18754 | OS=Homo sapiens<br>GN=RCC1<br>PE=1 SV=1 - [RCC1_HUMAN]                                                                                 | 22.33 | 1 | 8  | 8  | 43 | 1.105 | 1.228 | 0.885 | 1.260 | 128.21 | 22.33 | 13 | 43 | 421  | 44.9  | 7.52 |

|        |                                                                                                                             |       |   |    |    |    |       |       |       |       |        |       |    |    |      |       |       |
|--------|-----------------------------------------------------------------------------------------------------------------------------|-------|---|----|----|----|-------|-------|-------|-------|--------|-------|----|----|------|-------|-------|
| Q13506 | NGF1-A-binding protein 1<br>OS=Homo sapiens<br>GN=NAB1<br>PE=1 SV=2 - [NAB1_HUMAN]                                          | 4.52  | 1 | 2  | 2  | 5  | 0.824 | 0.826 | 0.954 | 1.260 | 8.03   | 4.52  | 3  | 5  | 487  | 54.4  | 6.70  |
| P24386 | Rab proteins geranylgeranyl transferase component A 1<br>OS=Homo sapiens<br>GN=CHM PE=1 SV=3 - [RAE1_HUMAN]                 | 4.29  | 2 | 2  | 2  | 4  | 0.995 | 1.059 | 1.357 | 1.260 | 12.81  | 4.29  | 3  | 4  | 653  | 73.4  | 4.75  |
| Q92738 | USP6 N-terminal-like protein<br>OS=Homo sapiens<br>GN=USP6NL<br>PE=1 SV=3 - [US6NL_HUMAN]                                   | 1.33  | 1 | 1  | 1  | 3  | 1.522 | 1.995 | 1.656 | 1.260 | 4.73   | 1.33  | 2  | 3  | 828  | 94.0  | 9.07  |
| Q9Y3Z3 | Deoxynucleoside triphosphate triphosphohydrolase SAMHD1<br>OS=Homo sapiens<br>GN=SAMHD1<br>PE=1 SV=2 - [SAMH1_HUMAN]        | 53.04 | 1 | 28 | 29 | 97 | 3.493 | 1.766 | 1.034 | 1.260 | 245.64 | 53.04 | 43 | 97 | 626  | 72.2  | 7.14  |
| P17301 | Integrin alpha-2<br>OS=Homo sapiens<br>GN=ITGA2<br>PE=1 SV=1 - [ITTA2_HUMAN]                                                | 24.64 | 1 | 23 | 24 | 83 | 1.193 | 0.850 | 0.682 | 1.260 | 210.84 | 24.64 | 34 | 83 | 1181 | 129.2 | 5.31  |
| Q8IZQ1 | WD repeat and FYVE domain-containing protein 3<br>OS=Homo sapiens<br>GN=WDFY3<br>PE=1 SV=2 - [WDFY3_HUMAN]                  | 1.73  | 1 | 4  | 5  | 6  | 1.089 | 0.852 | 1.124 | 1.260 | 11.23  | 1.73  | 6  | 6  | 3526 | 395.0 | 6.76  |
| Q9P015 | 39S ribosomal protein L15, mitochondrial<br>OS=Homo sapiens<br>GN=MRPL15<br>PE=1 SV=1 - [RM15_HUMAN]                        | 30.74 | 1 | 7  | 8  | 14 | 1.090 | 1.597 | 0.943 | 1.261 | 27.94  | 30.74 | 12 | 14 | 296  | 33.4  | 10.01 |
| Q9NUP1 | Biogenesis of lysosome-related organelles complex 1 subunit 4<br>OS=Homo sapiens<br>GN=BLOC1S4<br>PE=1 SV=1 - [BL1S4_HUMAN] | 33.18 | 1 | 4  | 6  | 12 | 1.187 | 0.957 | 1.009 | 1.261 | 28.37  | 33.18 | 9  | 12 | 217  | 23.3  | 4.98  |

|        |                                                                                                                                     |       |   |   |   |    |       |       |       |       |       |       |   |    |      |       |      |
|--------|-------------------------------------------------------------------------------------------------------------------------------------|-------|---|---|---|----|-------|-------|-------|-------|-------|-------|---|----|------|-------|------|
| Q9HCD5 | Nuclear receptor coactivator 5<br>OS=Homo sapiens<br>GN=NCOA5<br>PE=1 SV=2 - [NCOA5_HUMA]                                           | 10.19 | 1 | 6 | 6 | 18 | 0.899 | 0.984 | 1.087 | 1.261 | 46.20 | 10.19 | 6 | 18 | 579  | 65.5  | 9.60 |
| O43497 | Voltage-dependent T-type calcium channel subunit alpha-1G<br>OS=Homo sapiens<br>GN=CACNA1G<br>PE=2 SV=3 - [CAC1G_HUMAN]             | 0.97  | 1 | 2 | 2 | 2  | 1.194 | 0.948 | 0.876 | 1.262 | 5.50  | 0.97  | 2 | 2  | 2377 | 262.3 | 6.60 |
| Q9UHL9 | General transcription factor II-I repeat domain-containing protein 1<br>OS=Homo sapiens<br>GN=GTF2IRD1<br>PE=1 SV=1 - [GT2D1_HUMAN] | 0.83  | 1 | 1 | 1 | 2  | 0.965 | 0.926 | 1.130 | 1.262 | 3.93  | 0.83  | 1 | 2  | 959  | 106.0 | 6.87 |
| Q9H0L4 | Cleavage stimulation factor subunit 2 tau variant<br>OS=Homo sapiens<br>GN=CSTF2T<br>PE=1 SV=1 - [CSTFT_HUMAN]                      | 12.34 | 1 | 2 | 7 | 11 | 0.900 | 1.457 | 1.017 | 1.262 | 11.89 | 12.34 | 9 | 11 | 616  | 64.4  | 7.25 |
| Q7Z3T8 | Zinc finger FYVE domain-containing protein 16<br>OS=Homo sapiens<br>GN=ZFYVE16<br>PE=1 SV=3 - [ZFY16_HUMAN]                         | 4.61  | 1 | 8 | 8 | 10 | 1.099 | 0.732 | 0.803 | 1.262 | 16.37 | 4.61  | 9 | 10 | 1539 | 168.8 | 4.82 |
| Q96PE7 | Methylmalonyl-CoA epimerase, mitochondrial<br>OS=Homo sapiens<br>GN=MCEE<br>PE=1 SV=1 - [MCEE_HUMAN]                                | 13.07 | 1 | 2 | 2 | 6  | 1.008 | 1.265 | 0.964 | 1.262 | 4.71  | 13.07 | 4 | 6  | 176  | 18.7  | 9.09 |
| P28340 | DNA polymerase delta catalytic subunit<br>OS=Homo sapiens<br>GN=POLD1<br>PE=1 SV=2 - [DPOD1_HUMA]                                   | 4.43  | 1 | 4 | 5 | 14 | 0.953 | 2.802 | 1.242 | 1.263 | 19.02 | 4.43  | 7 | 14 | 1107 | 123.6 | 7.03 |
| Q9UKJ3 | G patch domain-containing protein 8<br>OS=Homo sapiens<br>GN=GPATCH8<br>PE=1 SV=2 - [GPTC8_HUMAN]                                   | 2.20  | 1 | 3 | 3 | 5  | 0.953 | 1.421 | 1.097 | 1.263 | 7.16  | 2.20  | 4 | 5  | 1502 | 164.1 | 8.66 |

|        |                                                                                                                          |       |   |    |    |     |       |       |       |       |         |       |    |     |      |       |      |
|--------|--------------------------------------------------------------------------------------------------------------------------|-------|---|----|----|-----|-------|-------|-------|-------|---------|-------|----|-----|------|-------|------|
| P29401 | <p>Transketolase<br/>OS=Homo sapiens<br/>GN=TKT PE=1 SV=3 - [TKT_HUMAN]</p>                                              | 53.29 | 1 | 33 | 34 | 451 | 1.552 | 1.012 | 1.052 | 1.263 | 1010.11 | 53.29 | 61 | 451 | 623  | 67.8  | 7.66 |
| Q07817 | <p>Bcl-2-like protein 1<br/>OS=Homo sapiens<br/>GN=BCL2L1 PE=1 SV=1 - [B2CL1_HUMAN]</p>                                  | 3.86  | 1 | 1  | 1  | 9   | 1.037 | 1.220 | 0.806 | 1.263 | 26.81   | 3.86  | 1  | 9   | 233  | 26.0  | 4.93 |
| Q96L92 | <p>Sorting nexin-27 OS=Homo sapiens<br/>GN=SNX27 PE=1 SV=2 - [SNX27_HUMAN]</p>                                           | 16.82 | 1 | 7  | 7  | 21  | 1.238 | 0.911 | 1.069 | 1.263 | 46.70   | 16.82 | 12 | 21  | 541  | 61.2  | 6.49 |
| Q9UBD0 | <p>Heat shock transcription factor, X-linked<br/>OS=Homo sapiens<br/>GN=HSFX1 PE=1 SV=1 - [HSFX1_HUMAN]</p>              | 1.89  | 1 | 1  | 1  | 1   | 0.832 | 0.678 | 0.959 | 1.263 | 1.95    | 1.89  | 1  | 1   | 423  | 46.7  | 7.11 |
| Q9H9J2 | <p>39S ribosomal protein L44, mitochondrial<br/>OS=Homo sapiens<br/>GN=MRPL44 PE=1 SV=1 - [RM44_HUMAN]</p>               | 26.51 | 1 | 9  | 9  | 22  | 1.069 | 1.113 | 0.964 | 1.263 | 55.80   | 26.51 | 12 | 22  | 332  | 37.5  | 8.40 |
| O00566 | <p>U3 small nucleolar ribonucleoprotein protein MPP10<br/>OS=Homo sapiens<br/>GN=MPHOSPH10 PE=1 SV=2 - [MPP10_HUMAN]</p> | 5.58  | 1 | 3  | 4  | 20  | 0.930 | 1.093 | 0.998 | 1.264 | 59.75   | 5.58  | 5  | 20  | 681  | 78.8  | 4.86 |
| Q9C0D5 | <p>Protein TANC1<br/>OS=Homo sapiens<br/>GN=TANC1 PE=1 SV=3 - [TANC1_HUMAN]</p>                                          | 5.37  | 1 | 8  | 9  | 15  | 1.158 | 0.903 | 1.062 | 1.264 | 22.33   | 5.37  | 11 | 15  | 1861 | 202.1 | 8.32 |
| P19971 | <p>Thymidine phosphorylase<br/>OS=Homo sapiens<br/>GN=TYMP PE=1 SV=2 - [TYPH_HUMAN]</p>                                  | 29.46 | 1 | 11 | 11 | 48  | 3.954 | 1.095 | 0.753 | 1.264 | 129.88  | 29.46 | 20 | 48  | 482  | 49.9  | 5.53 |
| Q9Y3C4 | <p>EKC/KEOPS complex subunit TPRKB<br/>OS=Homo sapiens<br/>GN=TPRKB PE=1 SV=1 - [TPRKB_HUMAN]</p>                        | 28.57 | 1 | 4  | 4  | 7   | 1.053 | 1.065 | 0.847 | 1.264 | 18.72   | 28.57 | 6  | 7   | 175  | 19.6  | 6.79 |

|        |                                                                                                                       |       |   |    |    |    |       |       |       |       |        |       |    |    |      |       |      |
|--------|-----------------------------------------------------------------------------------------------------------------------|-------|---|----|----|----|-------|-------|-------|-------|--------|-------|----|----|------|-------|------|
| Q7Z3B4 | Nudeoporphin<br>p54 OS=Homo sapiens<br>GN=NUP54<br>PE=1 SV=2 - [NUP54_HUMAN]                                          | 29.39 | 1 | 13 | 13 | 29 | 1.193 | 1.231 | 1.088 | 1.264 | 78.06  | 29.39 | 19 | 29 | 507  | 55.4  | 7.02 |
| Q8IZ83 | Aldehyde dehydrogenase family 16 member A1<br>OS=Homo sapiens<br>GN=ALDH16A1<br>PE=1 SV=2 - [A16A1_HUMAN]             | 19.45 | 1 | 14 | 14 | 45 | 1.588 | 0.696 | 0.621 | 1.264 | 109.96 | 19.45 | 27 | 45 | 802  | 85.1  | 6.79 |
| Q96PK6 | RNA-binding protein 14<br>OS=Homo sapiens<br>GN=RBM14<br>PE=1 SV=2 - [RBM14_HUMAN]                                    | 25.71 | 1 | 22 | 22 | 88 | 1.212 | 1.197 | 1.061 | 1.264 | 173.11 | 25.71 | 38 | 88 | 669  | 69.4  | 9.67 |
| Q8NHR7 | Uncharacterized protein C15orf43<br>OS=Homo sapiens<br>GN=C15orf43<br>PE=2 SV=1 - [CO043_HUMAN]                       | 7.27  | 1 | 1  | 1  | 1  | 0.728 | 1.161 | 1.247 | 1.264 | 0.00   | 7.27  | 1  | 1  | 220  | 25.3  | 7.59 |
| Q9H8L6 | Multimerin-2<br>OS=Homo sapiens<br>GN=MMRN2<br>PE=1 SV=2 - [MMRN2_HUMAN]                                              | 2.32  | 1 | 2  | 2  | 2  | 0.695 | 0.953 | 1.376 | 1.265 | 2.34   | 2.32  | 2  | 2  | 949  | 104.3 | 5.86 |
| P49750 | YLP motif-containing protein 1<br>OS=Homo sapiens<br>GN=YLPM1<br>PE=1 SV=3 - [YLPM1_HUMAN]                            | 13.99 | 2 | 22 | 23 | 88 | 1.181 | 1.464 | 1.165 | 1.265 | 205.91 | 13.99 | 35 | 88 | 1951 | 219.8 | 6.57 |
| Q9NRA8 | Eukaryotic translation initiation factor 4E transporter<br>OS=Homo sapiens<br>GN=EIF4ENIF1<br>PE=1 SV=2 - [4ET_HUMAN] | 3.96  | 2 | 4  | 4  | 7  | 1.133 | 1.527 | 1.323 | 1.265 | 13.84  | 3.96  | 5  | 7  | 985  | 108.1 | 8.32 |
| Q8NCS7 | Choline transporter-like protein 5<br>OS=Homo sapiens<br>GN=SLC44A5<br>PE=2 SV=4 - [CTL5_HUMAN]                       | 2.92  | 1 | 1  | 1  | 1  | 1.808 | 1.114 | 1.179 | 1.266 | 0.00   | 2.92  | 1  | 1  | 719  | 81.6  | 8.18 |
| Q13257 | Mitotic spindle assembly checkpoint protein MAD2A<br>OS=Homo sapiens<br>GN=MAD2L1<br>PE=1 SV=1 - [MD2L1_HUMAN]        | 3.41  | 1 | 1  | 1  | 9  | 1.007 | 1.036 | 0.660 | 1.266 | 20.48  | 3.41  | 2  | 9  | 205  | 23.5  | 5.08 |

|        |                                                                                                                             |       |   |    |    |    |       |       |       |       |        |       |    |    |     |       |      |
|--------|-----------------------------------------------------------------------------------------------------------------------------|-------|---|----|----|----|-------|-------|-------|-------|--------|-------|----|----|-----|-------|------|
| O43670 | BUB3-interacting and GLEBS motif-containing protein<br>ZNF207<br>OS=Homo sapiens<br>GN=ZNF207<br>PE=1 SV=1 - [ZNF207_HUMAN] | 11.30 | 1 | 4  | 4  | 53 | 1.028 | 1.182 | 0.890 | 1.266 | 121.23 | 11.30 | 7  | 53 | 478 | 50.7  | 9.10 |
| Q9BZD4 | Kinetochore protein Nuf2<br>OS=Homo sapiens<br>GN=NUF2<br>PE=1 SV=2 - [NUF2_HUMAN]                                          | 4.53  | 1 | 2  | 3  | 5  | 0.856 | 1.070 | 0.567 | 1.266 | 10.74  | 4.53  | 3  | 5  | 464 | 54.3  | 8.27 |
| O94906 | Pre-mRNA-processing factor 6<br>OS=Homo sapiens<br>GN=PRPF6<br>PE=1 SV=1 - [PRPF6_HUMAN]                                    | 19.02 | 1 | 19 | 19 | 66 | 1.140 | 1.174 | 0.964 | 1.266 | 141.87 | 19.02 | 30 | 66 | 941 | 106.9 | 8.25 |
| Q9UNX9 | ATP-sensitive inward rectifier potassium channel 14<br>OS=Homo sapiens<br>GN=KCNJ14<br>PE=1 SV=1 - [KCNJ14_HUMAN]           | 4.13  | 1 | 1  | 1  | 1  | 0.698 | 1.208 | 1.498 | 1.267 | 0.00   | 4.13  | 1  | 1  | 436 | 47.8  | 5.41 |
| Q9BUH6 | Uncharacterized protein C9orf142<br>OS=Homo sapiens<br>GN=C9orf142<br>PE=1 SV=2 - [C9orf142_HUMAN]                          | 34.80 | 1 | 8  | 8  | 16 | 0.982 | 1.379 | 1.313 | 1.267 | 42.25  | 34.80 | 13 | 16 | 204 | 21.6  | 5.48 |
| Q9UKC9 | F-box/LRR-repeat protein 2<br>OS=Homo sapiens<br>GN=FBXL2<br>PE=1 SV=3 - [FBXL2_HUMAN]                                      | 5.20  | 1 | 2  | 3  | 5  | 1.288 | 1.577 | 1.550 | 1.267 | 8.11   | 5.20  | 4  | 5  | 423 | 47.0  | 7.40 |
| Q6P1J9 | Parafibromin<br>OS=Homo sapiens<br>GN=CDC73<br>PE=1 SV=1 - [CDC73_HUMAN]                                                    | 13.75 | 1 | 7  | 7  | 27 | 1.007 | 1.151 | 1.000 | 1.267 | 47.38  | 13.75 | 11 | 27 | 531 | 60.5  | 9.61 |
| Q00059 | Transcription factor A, mitochondrial<br>OS=Homo sapiens<br>GN=TFAM<br>PE=1 SV=1 - [TFAM_HUMAN]                             | 41.06 | 1 | 13 | 13 | 37 | 0.930 | 1.057 | 0.851 | 1.267 | 72.59  | 41.06 | 21 | 37 | 246 | 29.1  | 9.72 |
| P56381 | ATP synthase subunit epsilon, mitochondrial<br>OS=Homo sapiens<br>GN=ATP5E<br>PE=1 SV=2 - [ATP5E_HUMAN]                     | 45.10 | 2 | 3  | 3  | 5  | 1.341 | 1.358 | 0.852 | 1.267 | 12.30  | 45.10 | 4  | 5  | 51  | 5.8   | 9.92 |

|        |                                                                                                                    |       |   |    |    |     |       |       |       |       |        |       |    |     |      |       |       |
|--------|--------------------------------------------------------------------------------------------------------------------|-------|---|----|----|-----|-------|-------|-------|-------|--------|-------|----|-----|------|-------|-------|
| O94905 | Erlin-2<br>OS=Homo sapiens<br>GN=ERLIN2<br>PE=1 SV=1 - [ERLIN2_HUMAN]                                              | 41.30 | 1 | 12 | 18 | 106 | 1.058 | 0.754 | 0.662 | 1.268 | 271.14 | 41.30 | 29 | 106 | 339  | 37.8  | 5.62  |
| Q8M4T8 | Carbonyl reductase family member 4<br>OS=Homo sapiens<br>GN=CBR4<br>PE=1 SV=3 - [CBR4_HUMAN]                       | 3.38  | 1 | 1  | 1  | 2   | 1.899 | 1.093 | 0.862 | 1.268 | 1.92   | 3.38  | 2  | 2   | 237  | 25.3  | 9.33  |
| Q6KF10 | Growth/differentiation factor 6<br>OS=Homo sapiens<br>GN=GDF6<br>PE=1 SV=1 - [GDF6_HUMAN]                          | 4.18  | 1 | 1  | 1  | 1   | 1.398 | 1.675 | 1.177 | 1.268 | 2.58   | 4.18  | 1  | 1   | 455  | 50.6  | 8.88  |
| Q969Z0 | Protein TBRG4<br>OS=Homo sapiens<br>GN=TBRG4<br>PE=1 SV=1 - [TBRG4_HUMAN]                                          | 13.63 | 1 | 8  | 8  | 16  | 0.978 | 1.007 | 1.036 | 1.268 | 31.70  | 13.63 | 12 | 16  | 631  | 70.7  | 7.42  |
| Q99836 | Myeloid differentiation primary response protein MyD88<br>OS=Homo sapiens<br>GN=MYD88<br>PE=1 SV=1 - [MYD88_HUMAN] | 22.64 | 1 | 5  | 5  | 12  | 1.238 | 1.078 | 1.162 | 1.268 | 26.17  | 22.64 | 8  | 12  | 296  | 33.2  | 6.15  |
| Q01130 | Serine/arginine-rich splicing factor 2<br>OS=Homo sapiens<br>GN=SRSF2<br>PE=1 SV=4 - [SRSF2_HUMAN]                 | 14.48 | 2 | 3  | 3  | 32  | 1.024 | 1.187 | 1.008 | 1.268 | 62.65  | 14.48 | 6  | 32  | 221  | 25.5  | 11.85 |
| P59045 | NACHT, LRR and PYD domains-containing protein 11<br>OS=Homo sapiens<br>GN=NLRP11<br>PE=2 SV=2 - [NAL11_HUMAN]      | 2.42  | 1 | 1  | 2  | 2   | 1.018 | 1.509 | 1.621 | 1.268 | 2.17   | 2.42  | 2  | 2   | 1033 | 117.7 | 7.71  |
| Q14865 | AT-rich interactive domain-containing protein 5B<br>OS=Homo sapiens<br>GN=ARID5B<br>PE=1 SV=3 - [ARI5B_HUMAN]      | 5.47  | 1 | 6  | 6  | 6   | 1.334 | 1.440 | 1.012 | 1.268 | 10.81  | 5.47  | 6  | 6   | 1188 | 132.3 | 8.72  |
| P61769 | Beta-2-microglobulin<br>OS=Homo sapiens<br>GN=B2M PE=1 SV=1 - [B2MG_HUMAN]                                         | 43.70 | 1 | 5  | 5  | 80  | 2.265 | 0.872 | 0.998 | 1.269 | 189.32 | 43.70 | 8  | 80  | 119  | 13.7  | 6.52  |

|        |                                                                                                                                                                                                                                                                                                                                                                                                                                                                                                                                                                                                                                                                                                                                                                                                                                                                                                                                                  |       |   |    |    |    |       |       |       |       |        |       |    |    |      |       |      |
|--------|--------------------------------------------------------------------------------------------------------------------------------------------------------------------------------------------------------------------------------------------------------------------------------------------------------------------------------------------------------------------------------------------------------------------------------------------------------------------------------------------------------------------------------------------------------------------------------------------------------------------------------------------------------------------------------------------------------------------------------------------------------------------------------------------------------------------------------------------------------------------------------------------------------------------------------------------------|-------|---|----|----|----|-------|-------|-------|-------|--------|-------|----|----|------|-------|------|
| Q9NVM9 | Protein<br>asunder<br>homolog<br>OS=Homo<br>sapiens<br>GN=ASUN<br>PE=1 SV=2 -<br>[ASUN_HUMAN]<br>Tripartite motif-<br>containing<br>protein 72<br>OS=Homo<br>sapiens<br>GN=TRIM72<br>PE=1 SV=2 -<br>[TRIM72_HUMAN<br>]<br>Tripartite motif-<br>containing<br>protein 3<br>OS=Homo<br>sapiens<br>GN=TRIM3<br>PE=1 SV=2 -<br>[TRIM3_HUMAN<br>]<br>Metastasis-<br>associated<br>protein MTA2<br>OS=Homo<br>sapiens<br>GN=MTA2<br>PE=1 SV=1 -<br>[MTA2_HUMAN]<br>UDP-N-<br>acetylglucosami<br>ne transferase<br>subunit ALG14<br>homolog<br>OS=Homo<br>sapiens<br>GN=ALG14<br>PE=2 SV=1 -<br>[ALG14_HUMAN<br>]<br>Structural<br>maintenance<br>of<br>chromosomes<br>protein 2<br>OS=Homo<br>sapiens<br>GN=SMC2<br>PE=1 SV=2 -<br>[SMC2_HUMAN]<br>CDKN2A-<br>interacting<br>protein<br>OS=Homo<br>sapiens<br>GN=CDKN2AIP<br>PE=1 SV=3 -<br>[CARF_HUMAN]<br>mRNA export<br>factor<br>OS=Homo<br>sapiens<br>GN=RAE1<br>PE=1 SV=1 -<br>[RAE1L_HUMAN<br>] | 7.22  | 1 | 5  | 5  | 12 | 1.207 | 1.068 | 0.890 | 1.269 | 21.66  | 7.22  | 8  | 12 | 706  | 80.2  | 6.70 |
| Q6ZMU5 | OS=Homo<br>sapiens<br>GN=TRIM72<br>PE=1 SV=2 -<br>[TRIM72_HUMAN<br>]<br>Tripartite motif-<br>containing<br>protein 3<br>OS=Homo<br>sapiens<br>GN=TRIM3<br>PE=1 SV=2 -<br>[TRIM3_HUMAN<br>]<br>Metastasis-<br>associated<br>protein MTA2<br>OS=Homo<br>sapiens<br>GN=MTA2<br>PE=1 SV=1 -<br>[MTA2_HUMAN]<br>UDP-N-<br>acetylglucosami<br>ne transferase<br>subunit ALG14<br>homolog<br>OS=Homo<br>sapiens<br>GN=ALG14<br>PE=2 SV=1 -<br>[ALG14_HUMAN<br>]<br>Structural<br>maintenance<br>of<br>chromosomes<br>protein 2<br>OS=Homo<br>sapiens<br>GN=SMC2<br>PE=1 SV=2 -<br>[SMC2_HUMAN]<br>CDKN2A-<br>interacting<br>protein<br>OS=Homo<br>sapiens<br>GN=CDKN2AIP<br>PE=1 SV=3 -<br>[CARF_HUMAN]<br>mRNA export<br>factor<br>OS=Homo<br>sapiens<br>GN=RAE1<br>PE=1 SV=1 -<br>[RAE1L_HUMAN<br>]                                                                                                                                                   | 3.77  | 1 | 1  | 1  | 1  | 1.290 | 0.712 | 1.955 | 1.269 | 2.61   | 3.77  | 1  | 1  | 477  | 52.7  | 6.48 |
| O75382 | OS=Homo<br>sapiens<br>GN=TRIM3<br>PE=1 SV=2 -<br>[TRIM3_HUMAN<br>]<br>Metastasis-<br>associated<br>protein MTA2<br>OS=Homo<br>sapiens<br>GN=MTA2<br>PE=1 SV=1 -<br>[MTA2_HUMAN]<br>UDP-N-<br>acetylglucosami<br>ne transferase<br>subunit ALG14<br>homolog<br>OS=Homo<br>sapiens<br>GN=ALG14<br>PE=2 SV=1 -<br>[ALG14_HUMAN<br>]<br>Structural<br>maintenance<br>of<br>chromosomes<br>protein 2<br>OS=Homo<br>sapiens<br>GN=SMC2<br>PE=1 SV=2 -<br>[SMC2_HUMAN]<br>CDKN2A-<br>interacting<br>protein<br>OS=Homo<br>sapiens<br>GN=CDKN2AIP<br>PE=1 SV=3 -<br>[CARF_HUMAN]<br>mRNA export<br>factor<br>OS=Homo<br>sapiens<br>GN=RAE1<br>PE=1 SV=1 -<br>[RAE1L_HUMAN<br>]                                                                                                                                                                                                                                                                           | 4.97  | 1 | 3  | 3  | 6  | 1.384 | 1.299 | 1.261 | 1.270 | 13.55  | 4.97  | 5  | 6  | 744  | 80.8  | 7.83 |
| O94776 | OS=Homo<br>sapiens<br>GN=MTA2<br>PE=1 SV=1 -<br>[MTA2_HUMAN]<br>UDP-N-<br>acetylglucosami<br>ne transferase<br>subunit ALG14<br>homolog<br>OS=Homo<br>sapiens<br>GN=ALG14<br>PE=2 SV=1 -<br>[ALG14_HUMAN<br>]<br>Structural<br>maintenance<br>of<br>chromosomes<br>protein 2<br>OS=Homo<br>sapiens<br>GN=SMC2<br>PE=1 SV=2 -<br>[SMC2_HUMAN]<br>CDKN2A-<br>interacting<br>protein<br>OS=Homo<br>sapiens<br>GN=CDKN2AIP<br>PE=1 SV=3 -<br>[CARF_HUMAN]<br>mRNA export<br>factor<br>OS=Homo<br>sapiens<br>GN=RAE1<br>PE=1 SV=1 -<br>[RAE1L_HUMAN<br>]                                                                                                                                                                                                                                                                                                                                                                                              | 18.56 | 1 | 8  | 12 | 33 | 1.036 | 1.170 | 0.937 | 1.270 | 61.58  | 18.56 | 21 | 33 | 668  | 75.0  | 9.66 |
| Q96F25 | OS=Homo<br>sapiens<br>GN=ALG14<br>PE=2 SV=1 -<br>[ALG14_HUMAN<br>]<br>Structural<br>maintenance<br>of<br>chromosomes<br>protein 2<br>OS=Homo<br>sapiens<br>GN=SMC2<br>PE=1 SV=2 -<br>[SMC2_HUMAN]<br>CDKN2A-<br>interacting<br>protein<br>OS=Homo<br>sapiens<br>GN=CDKN2AIP<br>PE=1 SV=3 -<br>[CARF_HUMAN]<br>mRNA export<br>factor<br>OS=Homo<br>sapiens<br>GN=RAE1<br>PE=1 SV=1 -<br>[RAE1L_HUMAN<br>]                                                                                                                                                                                                                                                                                                                                                                                                                                                                                                                                         | 5.09  | 1 | 1  | 1  | 2  | 1.132 | 1.270 | 0.895 | 1.270 | 5.93   | 5.09  | 1  | 2  | 216  | 24.1  | 8.94 |
| O95347 | OS=Homo<br>sapiens<br>GN=SMC2<br>PE=1 SV=2 -<br>[SMC2_HUMAN]<br>CDKN2A-<br>interacting<br>protein<br>OS=Homo<br>sapiens<br>GN=CDKN2AIP<br>PE=1 SV=3 -<br>[CARF_HUMAN]<br>mRNA export<br>factor<br>OS=Homo<br>sapiens<br>GN=RAE1<br>PE=1 SV=1 -<br>[RAE1L_HUMAN<br>]                                                                                                                                                                                                                                                                                                                                                                                                                                                                                                                                                                                                                                                                              | 17.13 | 1 | 20 | 20 | 50 | 1.154 | 1.635 | 0.777 | 1.270 | 128.74 | 17.13 | 31 | 50 | 1197 | 135.6 | 8.43 |
| Q9NXV6 | OS=Homo<br>sapiens<br>GN=CDKN2AIP<br>PE=1 SV=3 -<br>[CARF_HUMAN]<br>mRNA export<br>factor<br>OS=Homo<br>sapiens<br>GN=RAE1<br>PE=1 SV=1 -<br>[RAE1L_HUMAN<br>]                                                                                                                                                                                                                                                                                                                                                                                                                                                                                                                                                                                                                                                                                                                                                                                   | 14.48 | 1 | 6  | 6  | 14 | 1.171 | 1.837 | 1.164 | 1.271 | 25.36  | 14.48 | 10 | 14 | 580  | 61.1  | 9.01 |
| P78406 | OS=Homo<br>sapiens<br>GN=RAE1<br>PE=1 SV=1 -<br>[RAE1L_HUMAN<br>]                                                                                                                                                                                                                                                                                                                                                                                                                                                                                                                                                                                                                                                                                                                                                                                                                                                                                | 51.90 | 1 | 16 | 17 | 51 | 1.103 | 1.050 | 1.033 | 1.271 | 124.47 | 51.90 | 28 | 51 | 368  | 40.9  | 7.83 |



|            |                                                                                                         |       |    |   |    |     |       |       |       |       |        |       |    |     |     |       |       |
|------------|---------------------------------------------------------------------------------------------------------|-------|----|---|----|-----|-------|-------|-------|-------|--------|-------|----|-----|-----|-------|-------|
| Q14949     | Cytochrome b-c1 complex subunit 8<br>OS=Homo sapiens<br>GN=UQCRQ<br>PE=1 SV=4 - [QCR8_HUMAN]            | 37.80 | 1  | 3 | 3  | 26  | 1.155 | 1.167 | 0.851 | 1.271 | 69.06  | 37.80 | 6  | 26  | 82  | 9.9   | 10.08 |
| Q15365     | Poly(rC)-binding protein 1 OS=Homo sapiens<br>GN=PCBP1<br>PE=1 SV=2 - [PCBP1_HUMAN]                     | 41.57 | 1  | 7 | 13 | 153 | 1.086 | 1.076 | 0.986 | 1.271 | 419.29 | 41.57 | 24 | 153 | 356 | 37.5  | 7.09  |
| P52735     | Guanine nucleotide exchange factor VAV2 OS=Homo sapiens<br>GN=VAV2<br>PE=1 SV=2 - [VAV2_HUMAN]          | 9.79  | 1  | 7 | 8  | 25  | 1.346 | 0.849 | 1.113 | 1.271 | 63.21  | 9.79  | 13 | 25  | 878 | 101.2 | 7.08  |
| Q9BPZ7     | Target of rapamycin complex 2 subunit MAPKAP1 OS=Homo sapiens<br>GN=MAPKAP1<br>PE=1 SV=2 - [SIN1_HUMAN] | 2.87  | 1  | 1 | 2  | 3   | 1.422 | 1.246 | 1.381 | 1.272 | 4.69   | 2.87  | 2  | 3   | 522 | 59.1  | 7.55  |
| Q6UWP2     | Dehydrogenase/reductase SDR family member 11 OS=Homo sapiens<br>GN=DHRS11<br>PE=1 SV=1 - [DHR11_HUMAN]  | 4.62  | 1  | 1 | 1  | 1   | 1.077 | 1.187 | 1.136 | 1.272 | 2.81   | 4.62  | 1  | 1   | 260 | 28.3  | 6.64  |
| A0A087WVF3 | TBC1 domain family member 3D OS=Homo sapiens<br>GN=TBC1D3D<br>PE=2 SV=1 - [TBC3D_HUMAN]                 | 3.28  | 10 | 1 | 1  | 1   | 0.584 | 0.526 | 1.061 | 1.272 | 0.00   | 3.28  | 1  | 1   | 549 | 62.1  | 9.01  |
| Q5JU69     | Torsin-2A OS=Homo sapiens<br>GN=TOR2A<br>PE=2 SV=1 - [TOR2A_HUMAN]                                      | 9.97  | 1  | 1 | 1  | 1   |       |       |       | 1.273 | 0.00   | 9.97  | 1  | 1   | 321 | 35.7  | 7.97  |
| Q99417     | C-Myc-binding protein OS=Homo sapiens<br>GN=MYCBP<br>PE=1 SV=3 - [MYCBP_HUMAN]                          | 52.43 | 1  | 5 | 5  | 27  | 1.220 | 1.061 | 0.977 | 1.273 | 66.92  | 52.43 | 8  | 27  | 103 | 12.0  | 5.91  |
| P03928     | ATP synthase protein 8 OS=Homo sapiens<br>GN=MT-ATP8<br>PE=1 SV=1 - [ATP8_HUMAN]                        | 72.06 | 1  | 4 | 4  | 10  | 1.019 | 0.919 | 0.923 | 1.273 | 4.50   | 72.06 | 6  | 10  | 68  | 8.0   | 9.91  |

|        |                                                                                                                              |       |   |    |    |     |       |       |       |       |         |       |    |     |      |       |      |
|--------|------------------------------------------------------------------------------------------------------------------------------|-------|---|----|----|-----|-------|-------|-------|-------|---------|-------|----|-----|------|-------|------|
| Q9NYB9 | Abl interactor<br>2 OS=Homo<br>sapiens<br>GN=ABI2 PE=1<br>SV=1 -<br>[ABI2_HUMAN]                                             | 18.91 | 1 | 5  | 8  | 22  | 1.173 | 1.259 | 1.425 | 1.273 | 44.03   | 18.91 | 13 | 22  | 513  | 55.6  | 6.16 |
| Q69YN2 | CWF19-like<br>protein 1<br>OS=Homo<br>sapiens<br>GN=CWF19L1<br>PE=1 SV=2 -<br>[C19L1_HUMAN<br>]                              | 3.35  | 1 | 2  | 2  | 3   | 0.577 | 1.141 | 1.093 | 1.273 | 5.29    | 3.35  | 2  | 3   | 538  | 60.6  | 7.24 |
| Q8WUM0 | Nuclear pore<br>complex<br>protein<br>Nup133<br>OS=Homo<br>sapiens<br>GN=NUP133<br>PE=1 SV=2 -<br>[NU133_HUMAN]              | 12.37 | 1 | 14 | 14 | 44  | 1.130 | 1.081 | 0.965 | 1.273 | 100.17  | 12.37 | 25 | 44  | 1156 | 128.9 | 5.10 |
| P06396 | Gelsolin<br>OS=Homo<br>sapiens<br>GN=GSN PE=1<br>SV=1 -<br>[GELS_HUMAN]                                                      | 51.79 | 1 | 31 | 31 | 413 | 1.410 | 1.371 | 1.548 | 1.274 | 1111.53 | 51.79 | 48 | 413 | 782  | 85.6  | 6.28 |
| O15155 | BET1 homolog<br>OS=Homo<br>sapiens<br>GN=BET1<br>PE=1 SV=1 -<br>[BET1_HUMAN]                                                 | 15.25 | 1 | 2  | 2  | 4   | 0.813 | 2.195 | 1.408 | 1.274 | 12.81   | 15.25 | 3  | 4   | 118  | 13.3  | 9.06 |
| P31930 | Cytochrome b-<br>c1 complex<br>subunit 1,<br>mitochondrial<br>OS=Homo<br>sapiens<br>GN=UQCRC1<br>PE=1 SV=3 -<br>[QCR1_HUMAN] | 44.17 | 1 | 15 | 16 | 82  | 1.057 | 1.186 | 0.818 | 1.274 | 203.80  | 44.17 | 25 | 82  | 480  | 52.6  | 6.37 |
| O14646 | Chromodomain-<br>helicase-DNA-<br>binding protein<br>1 OS=Homo<br>sapiens<br>GN=CHD1<br>PE=1 SV=2 -<br>[CHD1_HUMAN]          | 3.63  | 1 | 2  | 4  | 4   | 0.825 | 1.088 | 1.599 | 1.274 | 9.50    | 3.63  | 4  | 4   | 1710 | 196.6 | 7.14 |
| Q96EK9 | Protein KTI12<br>homolog<br>OS=Homo<br>sapiens<br>GN=KTI12<br>PE=1 SV=1 -<br>[KTI12_HUMAN<br>]                               | 12.43 | 1 | 4  | 4  | 8   | 0.808 | 0.839 | 1.021 | 1.274 | 17.99   | 12.43 | 5  | 8   | 354  | 38.6  | 6.95 |
| Q01831 | DNA repair<br>protein<br>complementing<br>XP-C cells<br>OS=Homo<br>sapiens<br>GN=XPC PE=1<br>SV=4 -<br>[XPC_HUMAN]           | 7.45  | 1 | 7  | 7  | 15  | 1.136 | 1.435 | 0.873 | 1.274 | 33.31   | 7.45  | 10 | 15  | 940  | 105.9 | 8.90 |

|        |                                                                                                                      |       |   |    |    |    |       |       |       |       |        |       |    |    |      |       |      |
|--------|----------------------------------------------------------------------------------------------------------------------|-------|---|----|----|----|-------|-------|-------|-------|--------|-------|----|----|------|-------|------|
| P35249 | Replication factor C subunit 4<br>OS=Homo sapiens<br>GN=RFC4<br>PE=1 SV=2 - [RFC4_HUMAN]                             | 17.63 | 1 | 5  | 5  | 8  | 1.348 | 1.397 | 1.003 | 1.274 | 14.17  | 17.63 | 7  | 8  | 363  | 39.7  | 8.02 |
| Q9H307 | Pinin<br>OS=Homo sapiens<br>GN=PNN PE=1 SV=4 - [PININ_HUMAN]                                                         | 21.90 | 2 | 16 | 18 | 59 | 1.192 | 1.102 | 1.035 | 1.274 | 141.47 | 21.90 | 27 | 59 | 717  | 81.6  | 7.14 |
| Q8IYX3 | Coiled-coil domain-containing protein 116<br>OS=Homo sapiens<br>GN=CCDC116<br>PE=2 SV=2 - [CC116_HUMAN]              | 3.50  | 1 | 1  | 2  | 2  | 1.015 | 0.514 | 1.351 | 1.275 | 2.02   | 3.50  | 2  | 2  | 515  | 56.9  | 9.64 |
| Q9Y240 | C-type lectin domain family 11 member A<br>OS=Homo sapiens<br>GN=CLEC11A<br>PE=1 SV=1 - [CLC11_HUMAN]                | 8.05  | 1 | 2  | 2  | 8  | 0.571 | 0.460 | 0.526 | 1.275 | 19.67  | 8.05  | 4  | 8  | 323  | 35.7  | 5.16 |
| Q49AR2 | UPF0489 protein C5orf22<br>OS=Homo sapiens<br>GN=C5orf22<br>PE=1 SV=2 - [CE022_HUMAN]                                | 1.58  | 1 | 1  | 1  | 2  | 0.925 | 0.819 | 1.121 | 1.275 | 2.28   | 1.58  | 1  | 2  | 442  | 49.9  | 4.78 |
| Q07820 | Induced myeloid leukemia cell differentiation protein Md-1<br>OS=Homo sapiens<br>GN=MCL1<br>PE=1 SV=3 - [MCL1_HUMAN] | 5.71  | 1 | 1  | 1  | 4  | 0.958 | 1.000 | 0.838 | 1.276 | 17.13  | 5.71  | 1  | 4  | 350  | 37.3  | 5.66 |
| Q96B26 | Exosome complex component RRP43<br>OS=Homo sapiens<br>GN=EXOSC8<br>PE=1 SV=1 - [EXOS8_HUMAN]                         | 2.90  | 1 | 1  | 1  | 2  | 1.331 | 1.416 | 0.868 | 1.276 | 2.86   | 2.90  | 1  | 2  | 276  | 30.0  | 5.30 |
| Q99719 | Septin-5<br>OS=Homo sapiens<br>GN=SEPT5<br>PE=1 SV=1 - [SEPT5_HUMAN]                                                 | 1.90  | 1 | 1  | 1  | 2  | 1.460 | 0.890 | 1.225 | 1.276 | 3.61   | 1.90  | 1  | 2  | 369  | 42.7  | 6.67 |
| Q7LBC6 | Lysine-specific demethylase 3B<br>OS=Homo sapiens<br>GN=KDM3B<br>PE=1 SV=2 - [KDM3B_HUMAN]                           | 6.47  | 1 | 7  | 8  | 15 | 1.310 | 0.966 | 1.093 | 1.276 | 30.59  | 6.47  | 12 | 15 | 1761 | 191.5 | 7.18 |

|        |                                                                                                                 |       |   |    |    |    |       |       |       |       |       |       |    |    |      |       |      |
|--------|-----------------------------------------------------------------------------------------------------------------|-------|---|----|----|----|-------|-------|-------|-------|-------|-------|----|----|------|-------|------|
| Q5D0E6 | DALR anticodon-binding domain-containing protein 3<br>OS=Homo sapiens<br>GN=DALRD3<br>PE=2 SV=2 - [DALD3_HUMAN] | 1.47  | 1 | 1  | 1  | 1  | 0.659 | 1.322 | 1.220 | 1.276 | 2.48  | 1.47  | 1  | 1  | 543  | 59.3  | 7.42 |
| Q9BRR6 | ADP-dependent glucokinase<br>OS=Homo sapiens<br>GN=ADPGK<br>PE=1 SV=1 - [ADPGK_HUMAN]                           | 15.09 | 1 | 5  | 5  | 14 | 1.155 | 0.737 | 0.771 | 1.276 | 31.93 | 15.09 | 9  | 14 | 497  | 54.1  | 6.20 |
| Q8IY37 | Probable ATP-dependent RNA helicase<br>DHX37<br>OS=Homo sapiens<br>GN=DHX37<br>PE=1 SV=1 - [DHX37_HUMAN]        | 2.59  | 1 | 2  | 3  | 5  | 0.949 | 1.424 | 1.443 | 1.276 | 13.55 | 2.59  | 4  | 5  | 1157 | 129.5 | 8.10 |
| Q9BRP4 | Proteasomal ATPase-associated factor 1<br>OS=Homo sapiens<br>GN=PAAF1<br>PE=1 SV=2 - [PAAF1_HUMAN]              | 8.16  | 1 | 3  | 3  | 6  | 1.003 | 1.079 | 1.160 | 1.276 | 8.37  | 8.16  | 4  | 6  | 392  | 42.2  | 6.32 |
| P23276 | Kell blood group glycoprotein<br>OS=Homo sapiens<br>GN=KEL PE=1 SV=2 - [KELL_HUMAN]                             | 3.69  | 1 | 2  | 2  | 2  | 0.825 | 1.473 | 2.049 | 1.276 | 0.00  | 3.69  | 2  | 2  | 732  | 82.8  | 7.90 |
| Q13901 | Nuclear nucleic acid-binding protein C1D<br>OS=Homo sapiens<br>GN=C1D PE=1 SV=1 - [C1D_HUMAN]                   | 9.22  | 2 | 1  | 2  | 3  | 0.730 | 1.186 | 1.314 | 1.277 | 5.32  | 9.22  | 3  | 3  | 141  | 16.0  | 9.03 |
| P28370 | Probable global transcription activator<br>SNF2L1<br>OS=Homo sapiens<br>GN=SMARCA1<br>PE=1 SV=2 - [SMCA1_HUMA]  | 14.80 | 1 | 13 | 17 | 41 | 1.057 | 1.115 | 1.052 | 1.277 | 80.35 | 14.80 | 24 | 41 | 1054 | 122.5 | 8.09 |
| Q01638 | Interleukin-1 receptor-like 1<br>OS=Homo sapiens<br>GN=IL1RL1<br>PE=1 SV=4 - [ILRL1_HUMAN]                      | 1.08  | 1 | 1  | 1  | 1  | 1.132 | 0.978 | 1.410 | 1.277 | 2.05  | 1.08  | 1  | 1  | 556  | 63.3  | 8.35 |

|        |                                                                                                                         |       |   |    |    |    |       |       |       |       |        |       |    |    |      |       |      |
|--------|-------------------------------------------------------------------------------------------------------------------------|-------|---|----|----|----|-------|-------|-------|-------|--------|-------|----|----|------|-------|------|
| Q9H479 | Fructosamine-3-kinase<br>OS=Homo sapiens<br>GN=F3NK<br>PE=1 SV=1 - [F3NK_HUMAN]                                         | 7.12  | 1 | 2  | 2  | 5  | 1.111 | 1.895 | 1.110 | 1.277 | 15.56  | 7.12  | 2  | 5  | 309  | 35.1  | 7.55 |
| Q9Y2R0 | Cytochrome c oxidase assembly factor 3 homolog, mitochondrial<br>OS=Homo sapiens<br>GN=COA3<br>PE=1 SV=1 - [COA3_HUMAN] | 27.36 | 1 | 3  | 3  | 7  | 0.943 | 0.935 | 0.791 | 1.277 | 22.30  | 27.36 | 5  | 7  | 106  | 11.7  | 9.60 |
| Q92922 | SWI1/SNF complex subunit SMARCC1<br>OS=Homo sapiens<br>GN=SMARCC1<br>PE=1 SV=3 - [SMRC1_HUMAN]                          | 13.21 | 1 | 9  | 15 | 33 | 1.093 | 1.274 | 0.891 | 1.277 | 83.95  | 13.21 | 22 | 33 | 1105 | 122.8 | 5.76 |
| Q9Y3M8 | STAR-related lipid transfer protein 13<br>OS=Homo sapiens<br>GN=STARD13<br>PE=1 SV=2 - [STA13_HUMAN]                    | 7.10  | 1 | 6  | 8  | 25 | 1.677 | 0.658 | 1.061 | 1.277 | 65.83  | 7.10  | 13 | 25 | 1113 | 124.9 | 7.02 |
| Q99459 | Cell division cycle 5-like protein<br>OS=Homo sapiens<br>GN=CDC5L<br>PE=1 SV=2 - [CDC5L_HUMAN]                          | 36.66 | 1 | 21 | 22 | 47 | 1.147 | 1.233 | 1.023 | 1.277 | 124.63 | 36.66 | 30 | 47 | 802  | 92.2  | 8.18 |
| Q4KMZ1 | IQ domain-containing protein C<br>OS=Homo sapiens<br>GN=IQCC<br>PE=2 SV=2 - [IQCC_HUMAN]                                | 1.72  | 1 | 1  | 1  | 10 | 1.696 | 1.972 | 1.548 | 1.278 | 19.17  | 1.72  | 2  | 10 | 466  | 53.0  | 7.99 |
| Q8NFH3 | Nudeoporin Nup43<br>OS=Homo sapiens<br>GN=NUP43<br>PE=1 SV=1 - [NUP43_HUMAN]                                            | 19.74 | 1 | 6  | 6  | 20 | 1.161 | 0.948 | 0.886 | 1.279 | 39.85  | 19.74 | 12 | 20 | 380  | 42.1  | 5.63 |
| P00533 | Epidermal growth factor receptor<br>OS=Homo sapiens<br>GN=EGFR<br>PE=1 SV=2 - [EGFR_HUMAN]                              | 19.26 | 1 | 20 | 22 | 64 | 1.269 | 0.864 | 1.030 | 1.279 | 160.03 | 19.26 | 34 | 64 | 1210 | 134.2 | 6.68 |

|        |                                                                                                                                            |       |   |    |    |     |       |       |       |       |        |       |    |     |      |       |      |
|--------|--------------------------------------------------------------------------------------------------------------------------------------------|-------|---|----|----|-----|-------|-------|-------|-------|--------|-------|----|-----|------|-------|------|
| O14735 | CDP-<br>diacylglycerol-<br>inositol 3-<br>phosphatidytra<br>nsferase<br>OS=Homo<br>sapiens<br>GN=CDIPT<br>PE=1 SV=1 -<br>[CDIPT_HUMAN<br>] | 9.86  | 1 | 2  | 2  | 7   | 0.980 | 0.754 | 0.748 | 1.279 | 10.94  | 9.86  | 4  | 7   | 213  | 23.5  | 8.03 |
| Q9C0E8 | Protein<br>lunapark<br>OS=Homo<br>sapiens<br>GN=LNP PE=1<br>SV=2 -<br>[LNP_HUMAN]                                                          | 23.36 | 1 | 8  | 8  | 25  | 1.311 | 1.277 | 1.310 | 1.279 | 65.42  | 23.36 | 14 | 25  | 428  | 47.7  | 5.11 |
| Q06787 | Fragile X<br>mental<br>retardation<br>protein 1<br>OS=Homo<br>sapiens<br>GN=FMR1<br>PE=1 SV=1 -<br>[FMR1_HUMAN]                            | 24.68 | 1 | 11 | 15 | 44  | 1.352 | 1.372 | 1.093 | 1.279 | 96.98  | 24.68 | 21 | 44  | 632  | 71.1  | 7.42 |
| P21926 | CD9 antigen<br>OS=Homo<br>sapiens<br>GN=CD9 PE=1<br>SV=4 -<br>[CD9_HUMAN]                                                                  | 13.60 | 1 | 5  | 5  | 22  | 3.916 | 1.350 | 2.138 | 1.279 | 42.81  | 13.60 | 7  | 22  | 228  | 25.4  | 7.15 |
| Q86YV5 | Tyrosine-<br>protein kinase<br>SgK223<br>OS=Homo<br>sapiens<br>GN=SGK223<br>PE=1 SV=4 -<br>[SG223_HUMAN<br>]                               | 0.92  | 1 | 1  | 1  | 1   | 1.011 | 1.999 | 1.458 | 1.280 | 3.22   | 0.92  | 1  | 1   | 1406 | 149.5 | 7.20 |
| P09874 | Poly [ADP-<br>ribose]<br>polymerase 1<br>OS=Homo<br>sapiens<br>GN=PARP1<br>PE=1 SV=4 -<br>[PARP1_HUMAN<br>]                                | 38.56 | 1 | 37 | 37 | 109 | 1.231 | 1.564 | 1.149 | 1.280 | 268.09 | 38.56 | 56 | 109 | 1014 | 113.0 | 8.88 |
| Q969S8 | Histone<br>deacetylase 10<br>OS=Homo<br>sapiens<br>GN=HDAC10<br>PE=1 SV=1 -<br>[HDA10_HUMAN<br>]                                           | 1.20  | 1 | 1  | 1  | 4   | 1.273 | 1.271 | 1.205 | 1.280 | 15.53  | 1.20  | 2  | 4   | 669  | 71.4  | 5.74 |
| Q9NQX3 | Gephyrin<br>OS=Homo<br>sapiens<br>GN=GPHN<br>PE=1 SV=1 -<br>[GEPH_HUMAN]                                                                   | 14.27 | 1 | 8  | 8  | 21  | 1.168 | 1.051 | 1.015 | 1.280 | 45.27  | 14.27 | 13 | 21  | 736  | 79.7  | 5.43 |
| Q6ZS25 | Rho guanine<br>nudeotide<br>exchange<br>factor 18<br>OS=Homo<br>sapiens<br>GN=ARHGEF18<br>PE=1 SV=3 -<br>[ARHGL_HUMAN]                     | 2.64  | 1 | 3  | 4  | 8   | 1.290 | 1.047 | 1.119 | 1.280 | 14.61  | 2.64  | 4  | 8   | 1173 | 130.7 | 7.08 |

|        |                                                                                                       |       |    |   |   |    |       |       |       |       |       |       |    |    |      |       |      |
|--------|-------------------------------------------------------------------------------------------------------|-------|----|---|---|----|-------|-------|-------|-------|-------|-------|----|----|------|-------|------|
| Q8TCC3 | 39S ribosomal protein L30, mitochondrial<br>OS=Homo sapiens<br>GN=MRPL30<br>PE=1 SV=1 - [RM30_HUMAN]  | 10.56 | 1  | 1 | 1 | 1  | 1.531 | 1.619 | 1.213 | 1.280 | 2.20  | 10.56 | 1  | 1  | 161  | 18.5  | 9.99 |
| Q96EX3 | WD repeat-containing protein 34<br>OS=Homo sapiens<br>GN=WDR34<br>PE=1 SV=2 - [WDR34_HUMAN]           | 1.87  | 1  | 1 | 1 | 1  | 1.543 | 1.131 | 0.826 | 1.280 | 0.00  | 1.87  | 1  | 1  | 536  | 57.8  | 6.64 |
| O43318 | Mitogen-activated protein kinase kinase 7<br>OS=Homo sapiens<br>GN=MAP3K7<br>PE=1 SV=1 - [M3K7_HUMAN] | 10.56 | 1  | 6 | 6 | 17 | 0.970 | 1.219 | 1.317 | 1.281 | 32.08 | 10.56 | 11 | 17 | 606  | 67.2  | 7.11 |
| Q9Y320 | Thioredoxin-related transmembrane protein 2<br>OS=Homo sapiens<br>GN=TMX2<br>PE=1 SV=1 - [TMX2_HUMAN] | 6.08  | 1  | 2 | 2 | 10 | 1.086 | 0.579 | 0.768 | 1.281 | 26.51 | 6.08  | 4  | 10 | 296  | 34.0  | 8.69 |
| P33076 | MHC class II transactivator<br>OS=Homo sapiens<br>GN=CIIITA<br>PE=1 SV=3 - [C2TA_HUMAN]               | 1.33  | 1  | 1 | 1 | 1  |       |       | 0.598 | 1.281 | 2.22  | 1.33  | 1  | 1  | 1130 | 123.4 | 5.47 |
| Q709F0 | Acyl-CoA dehydrogenase family member 11<br>OS=Homo sapiens<br>GN=ACAD11<br>PE=1 SV=2 - [ACD11_HUMAN]  | 10.38 | 1  | 6 | 6 | 13 | 1.012 | 1.326 | 1.497 | 1.281 | 30.45 | 10.38 | 8  | 13 | 780  | 87.2  | 8.12 |
| O60308 | Centrosomal protein of 104 kDa<br>OS=Homo sapiens<br>GN=CEP104<br>PE=1 SV=1 - [CE104_HUMAN]           | 3.46  | 1  | 2 | 3 | 4  | 1.609 | 0.686 | 1.555 | 1.281 | 4.54  | 3.46  | 3  | 4  | 925  | 104.4 | 7.62 |
| Q9Y2U5 | Mitogen-activated protein kinase kinase 2<br>OS=Homo sapiens<br>GN=MAP3K2<br>PE=1 SV=2 - [M3K2_HUMAN] | 6.79  | 1  | 3 | 4 | 9  | 0.939 | 0.722 | 0.926 | 1.281 | 17.00 | 6.79  | 6  | 9  | 619  | 69.7  | 8.00 |
| Q9Y5G8 | Protocadherin gamma-A5<br>OS=Homo sapiens<br>GN=PCDHGA5<br>PE=2 SV=1 - [PCDGS_HUMAN]                  | 4.83  | 13 | 1 | 3 | 5  |       |       |       | 1.282 | 11.04 | 4.83  | 4  | 5  | 931  | 100.9 | 4.87 |

|        |                                                                                                                                                             |       |   |   |   |    |       |       |       |       |       |       |    |     |      |       |      |
|--------|-------------------------------------------------------------------------------------------------------------------------------------------------------------|-------|---|---|---|----|-------|-------|-------|-------|-------|-------|----|-----|------|-------|------|
| Q9BUT1 | 3-hydroxybutyrate dehydrogenase type 2<br>OS=Homo sapiens<br>GN=BDH2<br>PE=1 SV=2 - [BDH2_HUMAN]                                                            | 28.57 | 1 | 7 | 8 | 36 | 1.642 | 0.847 | 0.685 | 1.282 | 79.80 | 28.57 | 13 | 36  | 245  | 26.7  | 7.65 |
| Q9HBF4 | Zinc finger FYVE domain-containing protein 1<br>OS=Homo sapiens<br>GN=ZFYVE1<br>PE=1 SV=1 - [ZFYV1_HUMAN]                                                   | 2.96  | 1 | 2 | 2 | 2  | 0.522 | 0.846 | 1.282 | 5.89  | 2.96  | 2     | 2  | 777 | 87.1 | 7.42  |      |
| Q13444 | Disintegrin and metalloproteinase domain-containing protein 15<br>OS=Homo sapiens<br>GN=ADAM15<br>PE=1 SV=4 - [ADA15_HUMAN]                                 | 4.63  | 1 | 4 | 4 | 6  | 0.878 | 0.714 | 0.904 | 1.282 | 12.57 | 4.63  | 5  | 6   | 863  | 92.9  | 6.73 |
| Q9BXI6 | TBC1 domain family member 10A<br>OS=Homo sapiens<br>GN=TBC1D10A<br>PE=1 SV=1 - [TB10A_HUMAN]                                                                | 23.62 | 1 | 9 | 9 | 30 | 1.650 | 0.966 | 1.114 | 1.282 | 48.65 | 23.62 | 15 | 30  | 508  | 57.1  | 8.44 |
| Q969G3 | SWI/SNF-related matrix-associated actin-dependent regulator of chromatin subfamily E member 1<br>OS=Homo sapiens<br>GN=SMARCE1<br>PE=1 SV=2 - [SMCE1_HUMAN] | 18.73 | 1 | 5 | 6 | 18 | 1.080 | 1.255 | 1.041 | 1.283 | 52.27 | 18.73 | 8  | 18  | 411  | 46.6  | 4.88 |
| Q9UPA5 | Protein bassoon<br>OS=Homo sapiens<br>GN=BSN<br>PE=2 SV=4 - [BSN_HUMAN]                                                                                     | 0.33  | 1 | 1 | 2 | 2  | 0.982 | 1.155 | 1.533 | 1.283 | 2.72  | 0.33  | 2  | 2   | 3926 | 416.2 | 7.55 |
| O14497 | AT-rich interactive domain-containing protein 1A<br>OS=Homo sapiens<br>GN=ARID1A<br>PE=1 SV=3 - [ARI1A_HUMAN]                                               | 4.29  | 1 | 7 | 8 | 19 | 0.919 | 1.303 | 1.026 | 1.284 | 38.61 | 4.29  | 12 | 19  | 2285 | 241.9 | 6.70 |



|        |                                                                                                                                   |       |   |    |    |     |       |       |       |       |        |       |    |     |      |       |      |
|--------|-----------------------------------------------------------------------------------------------------------------------------------|-------|---|----|----|-----|-------|-------|-------|-------|--------|-------|----|-----|------|-------|------|
| P21912 | Succinate dehydrogenase [ubiquinone] iron-sulfur subunit, mitochondrial<br>OS=Homo sapiens<br>GN=SDHB<br>PE=1 SV=3 - [SDHB_HUMAN] | 42.50 | 1 | 13 | 15 | 36  | 0.830 | 1.330 | 0.914 | 1.284 | 78.41  | 42.50 | 20 | 36  | 280  | 31.6  | 8.76 |
| Q99523 | Sortilin<br>OS=Homo sapiens<br>GN=SORT1<br>PE=1 SV=3 - [SORT_HUMAN]                                                               | 6.38  | 1 | 5  | 5  | 13  | 1.101 | 0.673 | 1.015 | 1.284 | 23.90  | 6.38  | 9  | 13  | 831  | 92.0  | 5.74 |
| Q7L4S7 | Protein ARMCX6<br>OS=Homo sapiens<br>GN=ARMCX6<br>PE=2 SV=1 - [ARMCX6_HUMAN]                                                      | 3.00  | 1 | 1  | 1  | 3   | 1.745 | 1.238 | 1.368 | 1.284 | 4.26   | 3.00  | 2  | 3   | 300  | 33.0  | 4.78 |
| Q7L2E3 | Putative ATP-dependent RNA helicase DHX30<br>OS=Homo sapiens<br>GN=DHX30<br>PE=1 SV=1 - [DHX30_HUMAN]                             | 14.66 | 1 | 16 | 18 | 49  | 1.047 | 0.903 | 0.931 | 1.284 | 100.61 | 14.66 | 29 | 49  | 1194 | 133.9 | 8.78 |
| Q9NVU7 | Protein SDA1 homolog<br>OS=Homo sapiens<br>GN=SDAD1<br>PE=1 SV=3 - [SDA1_HUMAN]                                                   | 6.40  | 1 | 5  | 5  | 7   | 0.637 | 0.775 | 0.696 | 1.284 | 14.26  | 6.40  | 6  | 7   | 687  | 79.8  | 9.25 |
| O60336 | Mitogen-activated protein kinase-binding protein 1<br>OS=Homo sapiens<br>GN=MAPKBP1<br>PE=1 SV=4 - [MABP1_HUMAN]                  | 1.39  | 1 | 2  | 3  | 5   | 0.547 | 1.340 | 1.354 | 1.285 | 9.90   | 1.39  | 4  | 5   | 1514 | 163.7 | 6.76 |
| Q9NTX5 | Ethylmalonyl-CoA decarboxylase<br>OS=Homo sapiens<br>GN=ECHDC1<br>PE=1 SV=2 - [ECHD1_HUMAN]                                       | 38.11 | 1 | 10 | 10 | 31  | 0.856 | 0.972 | 0.870 | 1.285 | 75.90  | 38.11 | 16 | 31  | 307  | 33.7  | 8.21 |
| P06400 | Retinoblastoma-associated protein<br>OS=Homo sapiens<br>GN=RB1<br>PE=1 SV=2 - [RB_HUMAN]                                          | 6.79  | 1 | 6  | 7  | 11  | 1.530 | 1.198 | 0.978 | 1.285 | 23.58  | 6.79  | 9  | 11  | 928  | 106.1 | 7.94 |
| Q15029 | 116 kDa U5 small nuclear ribonucleoprotein component<br>OS=Homo sapiens<br>GN=EFTUD2<br>PE=1 SV=1 - [U5S1_HUMAN]                  | 29.84 | 1 | 24 | 25 | 156 | 1.094 | 1.154 | 0.897 | 1.285 | 348.05 | 29.84 | 41 | 156 | 972  | 109.4 | 5.00 |

|        |                                                                                                                                                  |       |   |    |    |    |       |       |       |       |        |       |    |    |      |       |      |
|--------|--------------------------------------------------------------------------------------------------------------------------------------------------|-------|---|----|----|----|-------|-------|-------|-------|--------|-------|----|----|------|-------|------|
| Q5VT52 | Regulation of<br>nuclear pre-<br>mRNA domain-<br>containing<br>protein 2<br>OS=Homo<br>sapiens<br>GN=RPRD2<br>PE=1 SV=1 -<br>[RPRD2_HUMAN<br>]   | 6.02  | 1 | 6  | 6  | 10 | 1.041 | 1.529 | 1.113 | 1.285 | 21.54  | 6.02  | 7  | 10 | 1461 | 155.9 | 7.42 |
| Q9Y2P8 | RNA 3'-terminal<br>phosphate<br>cyclase-like<br>protein<br>OS=Homo<br>sapiens<br>GN=RCL1 PE=1<br>SV=3 -<br>[RCL1_HUMAN]                          | 6.43  | 1 | 3  | 3  | 4  | 0.836 | 0.743 | 0.603 | 1.285 | 8.61   | 6.43  | 4  | 4  | 373  | 40.8  | 9.26 |
| Q6ZP01 | RNA-binding<br>protein 44<br>OS=Homo<br>sapiens<br>GN=RBM44<br>PE=2 SV=2 -<br>[RBM44_HUMAN]                                                      | 1.24  | 1 | 1  | 1  | 2  | 0.198 | 1.163 | 2.089 | 1.286 | 2.89   | 1.24  | 1  | 2  | 1051 | 117.9 | 5.72 |
| O95785 | Protein Wiz<br>OS=Homo<br>sapiens<br>GN=WIZ PE=1<br>SV=2 -<br>[WIZ_HUMAN]                                                                        | 1.51  | 1 | 1  | 2  | 2  | 1.083 | 1.981 | 1.192 | 1.286 | 5.15   | 1.51  | 2  | 2  | 1651 | 178.6 | 6.86 |
| Q6P6B7 | Ankyrin repeat<br>domain-<br>containing<br>protein 16<br>OS=Homo<br>sapiens<br>GN=ANKRD16<br>PE=1 SV=1 -<br>[ANR16_HUMAN<br>]                    | 3.05  | 1 | 1  | 1  | 3  | 1.841 | 0.984 | 0.799 | 1.286 | 6.30   | 3.05  | 2  | 3  | 361  | 39.3  | 7.25 |
| Q86U90 | YrdC domain-<br>containing<br>protein,<br>mitochondrial<br>OS=Homo<br>sapiens<br>GN=YRDC<br>PE=1 SV=1 -<br>[YRDC_HUMAN]                          | 10.75 | 1 | 2  | 2  | 4  | 1.401 | 1.709 | 1.143 | 1.286 | 13.44  | 10.75 | 3  | 4  | 279  | 29.3  | 8.57 |
| O14925 | Mitochondrial<br>import inner<br>membrane<br>translocase<br>subunit Tim23<br>OS=Homo<br>sapiens<br>GN=TIMM23<br>PE=1 SV=1 -<br>[TIM23_HUMAN<br>] | 5.26  | 2 | 1  | 1  | 5  | 1.107 | 0.761 | 0.851 | 1.286 | 5.58   | 5.26  | 2  | 5  | 209  | 21.9  | 8.60 |
| Q01433 | AMP<br>deaminase 2<br>OS=Homo<br>sapiens<br>GN=AMPD2<br>PE=1 SV=2 -<br>[AMPD2_HUMAN]                                                             | 24.46 | 1 | 22 | 22 | 71 | 0.790 | 0.842 | 0.892 | 1.287 | 191.20 | 24.46 | 37 | 71 | 879  | 100.6 | 6.93 |

|        |                                                                                                              |       |   |   |   |    |       |       |       |       |       |       |   |    |      |       |      |
|--------|--------------------------------------------------------------------------------------------------------------|-------|---|---|---|----|-------|-------|-------|-------|-------|-------|---|----|------|-------|------|
| Q96G46 | tRNA-dihydrouridine(47) synthase [NAD(P)(+)]-like OS=Homo sapiens GN=DUS3L PE=1 SV=2 - [DUS3L_HUMAN]         | 6.77  | 1 | 3 | 3 | 4  | 0.955 | 0.923 | 1.086 | 1.287 | 12.65 | 6.77  | 4 | 4  | 650  | 72.5  | 8.05 |
| Q96CP2 | FLYWCH family member 2 OS=Homo sapiens GN=FLYWCH2 PE=1 SV=1 - [FWCH2_HUMAN]                                  | 30.00 | 1 | 3 | 3 | 18 | 1.273 | 0.903 | 0.894 | 1.287 | 42.87 | 30.00 | 6 | 18 | 140  | 14.6  | 8.46 |
| Q9BUA3 | Uncharacterized protein C11orf84 OS=Homo sapiens GN=C11orf84 PE=1 SV=3 - [CK084_HUMAN]                       | 7.61  | 1 | 2 | 2 | 5  | 1.377 | 1.125 | 1.283 | 1.287 | 13.27 | 7.61  | 3 | 5  | 381  | 41.0  | 5.01 |
| Q12986 | Transcriptional repressor NF-X1 OS=Homo sapiens GN=NFX1 PE=1 SV=2 - [NFX1_HUMAN]                             | 1.88  | 1 | 2 | 2 | 3  | 0.836 | 1.042 | 0.918 | 1.287 | 8.12  | 1.88  | 2 | 3  | 1120 | 124.3 | 8.24 |
| Q7Z3K3 | Pogo transposable element with ZNF domain OS=Homo sapiens GN=POGZ PE=1 SV=2 - [POGZ_HUMAN]                   | 3.40  | 1 | 4 | 4 | 10 | 1.134 | 1.389 | 1.178 | 1.288 | 19.21 | 3.40  | 6 | 10 | 1410 | 155.2 | 7.40 |
| Q8N5C6 | S1 RNA-binding domain-containing protein 1 OS=Homo sapiens GN=SRBD1 PE=1 SV=2 - [SRBD1_HUMAN]                | 0.90  | 1 | 1 | 1 | 1  | 1.190 | 1.234 | 1.326 | 1.288 | 2.40  | 0.90  | 1 | 1  | 995  | 111.7 | 8.72 |
| Q9BQ61 | Uncharacterized protein C19orf43 OS=Homo sapiens GN=C19orf43 PE=1 SV=1 - [CS043_HUMAN]                       | 39.20 | 1 | 6 | 6 | 18 | 1.156 | 1.118 | 0.913 | 1.288 | 43.27 | 39.20 | 7 | 18 | 176  | 18.4  | 9.44 |
| Q96LM1 | Putative uncharacterized protein encoded by LINC00615 OS=Homo sapiens GN=LINC00615 PE=5 SV=1 - [CL037_HUMAN] | 10.61 | 1 | 1 | 1 | 1  | 2.148 | 2.586 | 2.427 | 1.289 | 0.00  | 10.61 | 1 | 1  | 132  | 14.5  | 9.91 |

|        |                                                                                                                  |       |   |    |    |     |       |       |       |       |        |       |    |     |      |       |      |
|--------|------------------------------------------------------------------------------------------------------------------|-------|---|----|----|-----|-------|-------|-------|-------|--------|-------|----|-----|------|-------|------|
| Q8IZX4 | Transcription initiation factor TFIID subunit 1-like<br>OS=Homo sapiens<br>GN=TAF1L<br>PE=1 SV=1 - [TAF1L_HUMAN] | 0.38  | 1 | 1  | 1  | 1   | 1.030 | 1.284 | 1.172 | 1.289 | 1.98   | 0.38  | 1  | 1   | 1826 | 207.2 | 5.40 |
| O95602 | DNA-directed RNA polymerase I subunit RPA1<br>OS=Homo sapiens<br>GN=POLR1A<br>PE=1 SV=2 - [RPA1_HUMAN]           | 3.55  | 1 | 6  | 6  | 16  | 0.949 | 1.123 | 1.219 | 1.289 | 32.67  | 3.55  | 8  | 16  | 1720 | 194.7 | 7.03 |
| Q7Z3E2 | Coiled-coil domain-containing protein 186<br>OS=Homo sapiens<br>GN=CCDC186<br>PE=1 SV=2 - [CC186_HUMAN]          | 4.57  | 1 | 2  | 3  | 6   | 1.192 | 0.872 | 1.895 | 1.289 | 15.27  | 4.57  | 5  | 6   | 898  | 103.6 | 6.27 |
| P43243 | Matrin-3<br>OS=Homo sapiens<br>GN=MATR3<br>PE=1 SV=2 - [MATR3_HUMAN]                                             | 34.12 | 1 | 28 | 28 | 169 | 1.125 | 1.151 | 1.143 | 1.289 | 432.23 | 34.12 | 43 | 169 | 847  | 94.6  | 6.25 |
| Q9UER7 | Death domain-associated protein 6<br>OS=Homo sapiens<br>GN=DAXX<br>PE=1 SV=2 - [DAXX_HUMAN]                      | 6.62  | 1 | 4  | 4  | 5   | 1.030 | 1.049 | 0.940 | 1.289 | 15.47  | 6.62  | 5  | 5   | 740  | 81.3  | 4.87 |
| Q9BVJ7 | Dual specificity protein phosphatase 23<br>OS=Homo sapiens<br>GN=DUSP23<br>PE=1 SV=1 - [DUS23_HUMAN]             | 22.00 | 1 | 3  | 3  | 6   | 1.035 | 1.149 | 1.115 | 1.290 | 17.57  | 22.00 | 5  | 6   | 150  | 16.6  | 8.21 |
| P49792 | E3 SUMO-protein ligase RanBP2<br>OS=Homo sapiens<br>GN=RANBP2<br>PE=1 SV=2 - [RBP2_HUMAN]                        | 21.12 | 5 | 33 | 63 | 164 | 1.163 | 1.280 | 0.948 | 1.290 | 383.59 | 21.12 | 88 | 164 | 3224 | 358.0 | 6.20 |
| Q7L2J0 | 7SK snRNA methylphosphate capping enzyme<br>OS=Homo sapiens<br>GN=MEPCE<br>PE=1 SV=1 - [MEPCE_HUMAN]             | 8.27  | 1 | 5  | 5  | 9   | 0.834 | 1.298 | 1.201 | 1.290 | 20.17  | 8.27  | 7  | 9   | 689  | 74.3  | 9.57 |

|        |                                                                                                                        |       |   |    |    |    |       |       |       |       |        |       |    |    |      |       |       |
|--------|------------------------------------------------------------------------------------------------------------------------|-------|---|----|----|----|-------|-------|-------|-------|--------|-------|----|----|------|-------|-------|
| Q14498 | RNA-binding protein 39<br>OS=Homo sapiens<br>GN=RBM39<br>PE=1 SV=2 - [RBM39_HUMAN]                                     | 25.28 | 1 | 12 | 12 | 36 | 1.109 | 1.326 | 0.958 | 1.290 | 89.15  | 25.28 | 17 | 36 | 530  | 59.3  | 10.10 |
| O00541 | Pescadillo homolog<br>OS=Homo sapiens<br>GN=PES1<br>PE=1 SV=1 - [PESC_HUMAN]                                           | 21.09 | 1 | 12 | 13 | 30 | 0.712 | 0.820 | 0.694 | 1.290 | 71.97  | 21.09 | 19 | 30 | 588  | 68.0  | 7.33  |
| P23786 | Carnitine O-palmitoyltransferase 2, mitochondrial<br>OS=Homo sapiens<br>GN=CPT2<br>PE=1 SV=2 - [CPT2_HUMAN]            | 34.35 | 1 | 23 | 23 | 50 | 1.275 | 1.043 | 0.763 | 1.291 | 123.69 | 34.35 | 32 | 50 | 658  | 73.7  | 8.18  |
| Q8NEB9 | Phosphatidylinositol 3-kinase catalytic subunit type 3<br>OS=Homo sapiens<br>GN=PIK3C3<br>PE=1 SV=1 - [PIK3C3_HUMAN]   | 8.68  | 1 | 7  | 7  | 20 | 0.965 | 0.857 | 0.931 | 1.291 | 49.41  | 8.68  | 13 | 20 | 887  | 101.5 | 6.81  |
| A6NGB9 | WAS/WASL-interacting protein family member 3<br>OS=Homo sapiens<br>GN=WIPF3<br>PE=2 SV=4 - [WIPF3_HUMAN]               | 1.45  | 1 | 1  | 1  | 4  | 1.513 | 1.245 | 1.948 | 1.291 | 9.10   | 1.45  | 1  | 4  | 483  | 49.4  | 10.15 |
| Q9UPT6 | C-Jun-amino-terminal kinase-interacting protein 3<br>OS=Homo sapiens<br>GN=MAPK8IP3<br>PE=1 SV=3 - [IIP3_HUMAN]        | 6.36  | 1 | 4  | 5  | 7  | 0.955 | 1.135 | 1.062 | 1.292 | 15.83  | 6.36  | 6  | 7  | 1336 | 147.4 | 5.40  |
| P16219 | Short-chain specific acyl-CoA dehydrogenase, mitochondrial<br>OS=Homo sapiens<br>GN=ACADS<br>PE=1 SV=1 - [ACADS_HUMAN] | 24.27 | 1 | 9  | 9  | 17 | 1.050 | 1.373 | 0.875 | 1.292 | 35.75  | 24.27 | 13 | 17 | 412  | 44.3  | 7.99  |
| P24723 | Protein kinase C eta type<br>OS=Homo sapiens<br>GN=PRKCH<br>PE=1 SV=4 - [KPCL_HUMAN]                                   | 3.81  | 1 | 1  | 2  | 5  | 1.601 | 2.007 | 1.297 | 1.293 | 8.16   | 3.81  | 2  | 5  | 683  | 77.8  | 7.77  |

|        |                                                                                                                                                                                              |       |   |    |    |     |       |       |       |       |        |       |    |     |      |       |      |
|--------|----------------------------------------------------------------------------------------------------------------------------------------------------------------------------------------------|-------|---|----|----|-----|-------|-------|-------|-------|--------|-------|----|-----|------|-------|------|
| Q7Z2W4 | Zinc finger<br>CCCH-type<br>antiviral<br>protein 1<br>OS=Homo<br>sapiens<br>GN=ZC3HAV1<br>PE=1 SV=3 -<br>[ZCCHV_HUMAN<br>U3 small<br>nucleolar RNA-<br>associated<br>protein 14<br>homolog A | 19.51 | 1 | 13 | 13 | 47  | 1.320 | 1.045 | 1.185 | 1.293 | 137.89 | 19.51 | 22 | 47  | 902  | 101.4 | 8.40 |
| Q9BVJ6 | OS=Homo<br>sapiens<br>GN=UTP14A<br>PE=1 SV=1 -<br>[UT14A_HUMAN<br>]<br>Non-POU<br>domain-<br>containing<br>octamer-<br>binding protein                                                       | 3.11  | 1 | 2  | 2  | 7   | 0.779 | 0.994 | 1.005 | 1.293 | 21.11  | 3.11  | 3  | 7   | 771  | 87.9  | 7.87 |
| Q15233 | OS=Homo<br>sapiens<br>GN=NONO<br>PE=1 SV=4 -<br>[NONO_HUMAN<br>]<br>Microfibrillar-<br>associated<br>protein 1                                                                               | 55.41 | 1 | 21 | 23 | 176 | 1.163 | 1.243 | 1.056 | 1.293 | 487.91 | 55.41 | 41 | 176 | 471  | 54.2  | 8.95 |
| P55081 | OS=Homo<br>sapiens<br>GN=MFAP1<br>PE=1 SV=2 -<br>[MFAP1_HUMAN<br>N]<br>Coiled-coil<br>domain-<br>containing<br>protein 170                                                                   | 23.23 | 1 | 6  | 8  | 15  | 1.376 | 1.429 | 1.124 | 1.293 | 50.62  | 23.23 | 11 | 15  | 439  | 51.9  | 4.98 |
| Q8IYT3 | OS=Homo<br>sapiens<br>GN=CCDC170<br>PE=2 SV=3 -<br>[CC170_HUMAN<br>]<br>ATP-<br>dependent<br>RNA helicase A                                                                                  | 2.10  | 1 | 1  | 2  | 4   | 0.992 | 1.490 | 1.283 | 1.293 | 8.38   | 2.10  | 2  | 4   | 715  | 82.2  | 6.64 |
| Q08211 | OS=Homo<br>sapiens<br>GN=DHX9<br>PE=1 SV=4 -<br>[DHX9_HUMAN]<br>Phosphatase<br>and actin<br>regulator 2                                                                                      | 34.96 | 1 | 39 | 42 | 197 | 1.149 | 1.148 | 0.960 | 1.293 | 553.04 | 34.96 | 61 | 197 | 1270 | 140.9 | 6.84 |
| O75167 | OS=Homo<br>sapiens<br>GN=PHACTR2<br>PE=1 SV=2 -<br>[PHAR2_HUMAN<br>]<br>Phytanoyl-CoA<br>dioxygenase,<br>peroxisomal                                                                         | 7.10  | 1 | 3  | 4  | 5   | 2.347 | 1.605 | 1.262 | 1.293 | 10.28  | 7.10  | 5  | 5   | 634  | 69.7  | 8.16 |
| O14832 | OS=Homo<br>sapiens<br>GN=PHYH<br>PE=1 SV=1 -<br>[PAHX_HUMAN]                                                                                                                                 | 5.92  | 1 | 3  | 3  | 6   | 0.996 | 1.163 | 1.141 | 1.293 | 12.30  | 5.92  | 4  | 6   | 338  | 38.5  | 8.47 |

|        |                                                                                                                |       |    |    |    |     |       |       |       |       |        |       |    |     |      |       |      |
|--------|----------------------------------------------------------------------------------------------------------------|-------|----|----|----|-----|-------|-------|-------|-------|--------|-------|----|-----|------|-------|------|
| Q15061 | WD repeat-containing protein 43<br>OS=Homo sapiens<br>GN=WDR43<br>PE=1 SV=3 - [WDR43_HUMAN]                    | 13.59 | 1  | 5  | 6  | 16  | 0.846 | 1.039 | 0.949 | 1.294 | 35.50  | 13.59 | 7  | 16  | 677  | 74.8  | 5.57 |
| Q5VYS8 | Terminal uridylyltransferase 7<br>OS=Homo sapiens<br>GN=ZCCHC6<br>PE=1 SV=1 - [TUT7_HUMAN]                     | 2.94  | 2  | 4  | 5  | 10  | 1.095 | 0.776 | 0.955 | 1.294 | 18.53  | 2.94  | 8  | 10  | 1495 | 171.1 | 6.83 |
| Q9HCK8 | Chromodomain-helicase-DNA-binding protein 8<br>OS=Homo sapiens<br>GN=CHD8<br>PE=1 SV=5 - [CHD8_HUMAN]          | 1.63  | 1  | 3  | 3  | 4   | 1.215 | 1.286 | 1.110 | 1.294 | 4.76   | 1.63  | 3  | 4   | 2581 | 290.3 | 6.47 |
| P60880 | Synaptosomal-associated protein 25<br>OS=Homo sapiens<br>GN=SNAP25<br>PE=1 SV=1 - [SNP25_HUMAN]                | 6.80  | 1  | 1  | 1  | 2   | 1.867 | 1.963 | 0.988 | 1.294 | 5.49   | 6.80  | 2  | 2   | 206  | 23.3  | 4.77 |
| B7Z6K7 | Putative uncharacterized zinc finger protein 814<br>OS=Homo sapiens<br>GN=ZNF814<br>PE=2 SV=2 - [ZNF814_HUMAN] | 2.57  | 11 | 1  | 2  | 3   | 1.373 | 1.301 | 1.147 | 1.294 | 5.25   | 2.57  | 3  | 3   | 855  | 97.3  | 8.85 |
| P20700 | Lamin-B1<br>OS=Homo sapiens<br>GN=LMNB1<br>PE=1 SV=2 - [LMNB1_HUMAN]                                           | 72.70 | 1  | 36 | 43 | 342 | 1.128 | 1.538 | 0.793 | 1.294 | 796.87 | 72.70 | 72 | 342 | 586  | 66.4  | 5.16 |
| P09455 | Retinol-binding protein 1<br>OS=Homo sapiens<br>GN=RBP1<br>PE=1 SV=2 - [RET1_HUMAN]                            | 53.33 | 1  | 6  | 6  | 14  | 0.869 | 3.984 | 1.146 | 1.294 | 37.28  | 53.33 | 9  | 14  | 135  | 15.8  | 5.11 |
| Q86UE8 | Serine/threonine-protein kinase tousled-like 2<br>OS=Homo sapiens<br>GN=TLK2<br>PE=1 SV=2 - [TLK2_HUMAN]       | 6.99  | 1  | 4  | 5  | 6   | 0.880 | 0.821 | 1.024 | 1.294 | 9.28   | 6.99  | 5  | 6   | 772  | 87.6  | 8.41 |
| P61604 | 10 kDa heat shock protein, mitochondrial<br>OS=Homo sapiens<br>GN=HSPE1<br>PE=1 SV=2 - [CH10_HUMAN]            | 63.73 | 1  | 9  | 9  | 122 | 1.012 | 1.676 | 1.054 | 1.295 | 198.06 | 63.73 | 16 | 122 | 102  | 10.9  | 8.92 |

|        |                                                                                                                            |       |   |    |    |    |       |       |       |       |        |       |    |    |      |       |       |
|--------|----------------------------------------------------------------------------------------------------------------------------|-------|---|----|----|----|-------|-------|-------|-------|--------|-------|----|----|------|-------|-------|
| Q14241 | Transcription elongation factor B polypeptide 3<br>OS=Homo sapiens<br>GN=TCEB3<br>PE=1 SV=2 - [ELOA1_HUMAN]                | 8.40  | 1 | 7  | 7  | 23 | 0.998 | 1.063 | 0.862 | 1.295 | 38.74  | 8.40  | 12 | 23 | 798  | 89.9  | 9.57  |
| O43741 | 5'-AMP-activated protein kinase subunit beta-2<br>OS=Homo sapiens<br>GN=PRKAB2<br>PE=1 SV=1 - [AAKB2_HUMAN]                | 9.19  | 1 | 2  | 2  | 7  | 0.727 | 0.709 | 1.140 | 1.295 | 14.60  | 9.19  | 3  | 7  | 272  | 30.3  | 6.46  |
| Q05209 | Tyrosine-protein phosphatase non-receptor type 12<br>OS=Homo sapiens<br>GN=PTPN12<br>PE=1 SV=3 - [PTN12_HUMAN]             | 20.26 | 1 | 13 | 13 | 46 | 1.119 | 0.957 | 1.138 | 1.295 | 93.33  | 20.26 | 22 | 46 | 780  | 88.1  | 5.62  |
| Q92522 | Histone H1x<br>OS=Homo sapiens<br>GN=H1FX<br>PE=1 SV=1 - [H1X_HUMAN]                                                       | 40.85 | 1 | 11 | 11 | 55 | 1.841 | 2.369 | 0.971 | 1.295 | 134.55 | 40.85 | 20 | 55 | 213  | 22.5  | 10.76 |
| Q8TA86 | Retinitis pigmentosa 9 protein<br>OS=Homo sapiens<br>GN=RP9 PE=1 SV=2 - [RP9_HUMAN]                                        | 4.98  | 1 | 1  | 1  | 2  | 1.012 | 1.487 | 0.954 | 1.295 | 2.77   | 4.98  | 1  | 2  | 221  | 26.1  | 9.79  |
| Q9C0E4 | Glutamate receptor-interacting protein 2<br>OS=Homo sapiens<br>GN=GRIP2<br>PE=1 SV=3 - [GRIP2_HUMAN]                       | 1.44  | 1 | 1  | 1  | 1  | 0.537 | 0.606 | 1.090 | 1.295 | 0.00   | 1.44  | 1  | 1  | 1043 | 112.4 | 6.49  |
| P19404 | NADH dehydrogenase [ubiquinone] flavoprotein 2, mitochondrial<br>OS=Homo sapiens<br>GN=NDUFV2<br>PE=1 SV=2 - [NDUV2_HUMAN] | 22.49 | 2 | 5  | 5  | 36 | 0.753 | 1.212 | 0.840 | 1.296 | 78.37  | 22.49 | 8  | 36 | 249  | 27.4  | 8.06  |
| Q2M218 | Zinc finger protein 630<br>OS=Homo sapiens<br>GN=ZNF630<br>PE=2 SV=1 - [ZNF630_HUMAN]                                      | 1.22  | 1 | 1  | 1  | 1  | 1.121 | 1.861 | 1.468 | 1.296 | 0.00   | 1.22  | 1  | 1  | 657  | 76.0  | 8.78  |



|        |                                                                                                                                   |       |   |    |    |    |       |       |       |       |        |       |    |    |      |       |       |
|--------|-----------------------------------------------------------------------------------------------------------------------------------|-------|---|----|----|----|-------|-------|-------|-------|--------|-------|----|----|------|-------|-------|
| Q9BYG3 | MKI67 FHA domain-interacting nucleolar phosphoprotein OS=Homo sapiens GN=NIFK PE=1 SV=1 - [MK671_HUMAN]                           | 23.21 | 1 | 6  | 6  | 13 | 0.831 | 0.841 | 0.764 | 1.296 | 21.76  | 23.21 | 9  | 13 | 293  | 34.2  | 9.88  |
| Q9H8H0 | Nucleolar protein 11 OS=Homo sapiens GN=NOL11 PE=1 SV=1 - [NOL11_HUMAN]                                                           | 5.01  | 1 | 4  | 4  | 5  | 0.852 | 1.099 | 0.911 | 1.297 | 6.71   | 5.01  | 4  | 5  | 719  | 81.1  | 6.07  |
| Q9BYD2 | 39S ribosomal protein L9, mitochondrial OS=Homo sapiens GN=MRPL9 PE=1 SV=2 - [RMO9_HUMAN]                                         | 16.48 | 1 | 4  | 4  | 9  | 0.949 | 0.974 | 1.032 | 1.298 | 25.90  | 16.48 | 6  | 9  | 267  | 30.2  | 10.08 |
| Q3KRA6 | UPF0538 protein C2orf76 OS=Homo sapiens GN=C2orf76 PE=1 SV=3 - [CB076_HUMAN]                                                      | 10.32 | 1 | 1  | 1  | 2  | 0.873 | 0.789 | 0.658 | 1.298 | 8.08   | 10.32 | 2  | 2  | 126  | 14.6  | 6.93  |
| O75385 | Serine/threonine-protein kinase ULK1 OS=Homo sapiens GN=ULK1 PE=1 SV=2 - [ULK1_HUMAN]                                             | 0.86  | 1 | 1  | 1  | 1  | 0.593 | 0.935 | 0.932 | 1.299 | 0.00   | 0.86  | 1  | 1  | 1050 | 112.6 | 8.79  |
| Q8TB72 | Pumilio homolog 2 OS=Homo sapiens GN=PUM2 PE=1 SV=2 - [PUM2_HUMAN]                                                                | 6.00  | 2 | 3  | 7  | 17 | 0.987 | 1.497 | 0.708 | 1.299 | 36.15  | 6.00  | 9  | 17 | 1066 | 114.1 | 7.08  |
| P62263 | 40S ribosomal protein S14 OS=Homo sapiens GN=RPS14 PE=1 SV=3 - [RS14_HUMAN]                                                       | 47.02 | 1 | 11 | 11 | 71 | 1.000 | 0.992 | 1.125 | 1.299 | 171.90 | 47.02 | 21 | 71 | 151  | 16.3  | 10.05 |
| O95299 | NADH dehydrogenase [ubiquinone] 1 alpha subcomplex subunit 10, mitochondrial OS=Homo sapiens GN=NDUFA10 PE=1 SV=1 - [NDUAA_HUMAN] | 30.70 | 2 | 9  | 9  | 17 | 1.018 | 0.897 | 1.104 | 1.300 | 44.42  | 30.70 | 13 | 17 | 355  | 40.7  | 8.48  |

|        |                                                                                                                                                                                                                                          |       |   |    |    |    |       |       |       |       |       |       |    |    |      |       |      |
|--------|------------------------------------------------------------------------------------------------------------------------------------------------------------------------------------------------------------------------------------------|-------|---|----|----|----|-------|-------|-------|-------|-------|-------|----|----|------|-------|------|
| Q9P2D1 | Chromodomain-helicase-DNA-binding protein<br>7 OS=Homo sapiens<br>GN=CHD7<br>PE=1 SV=3 - [CHD7_HUMAN]                                                                                                                                    | 1.33  | 1 | 3  | 4  | 6  | 0.661 | 0.554 | 0.728 | 1.300 | 6.47  | 1.33  | 4  | 6  | 2997 | 335.7 | 6.34 |
| Q9BY77 | Polymerase delta-interacting protein 3<br>OS=Homo sapiens<br>GN=POLDIP3<br>PE=1 SV=2 - [PDIP3_HUMAN<br>LysM and putative peptidoglycan-binding domain-containing protein 3<br>OS=Homo sapiens<br>GN=LYSMD3<br>PE=1 SV=2 - [LYSM3_HUMAN ] | 18.29 | 1 | 7  | 7  | 17 | 1.063 | 1.051 | 0.985 | 1.300 | 41.18 | 18.29 | 11 | 17 | 421  | 46.1  | 9.99 |
| Q7Z3D4 | Inter-alpha-trypsin inhibitor heavy chain H2<br>OS=Homo sapiens<br>GN=ITIH2<br>PE=1 SV=2 - [ITIH2_HUMAN]                                                                                                                                 | 3.59  | 1 | 1  | 1  | 1  | 0.612 | 1.015 | 1.501 | 1.300 | 2.99  | 3.59  | 1  | 1  | 306  | 34.5  | 5.97 |
| P19823 | Sorting and assembly machinery component 50 homolog<br>OS=Homo sapiens<br>GN=SAMM50<br>PE=1 SV=3 - [SAM50_HUMAN ]                                                                                                                        | 3.07  | 1 | 2  | 3  | 10 | 0.853 | 0.599 | 0.992 | 1.301 | 20.56 | 3.07  | 4  | 10 | 946  | 106.4 | 6.86 |
| Q9Y512 | Integrator complex subunit 6<br>OS=Homo sapiens<br>GN=INTS6<br>PE=1 SV=1 - [INT6_HUMAN]                                                                                                                                                  | 21.32 | 1 | 10 | 10 | 19 | 1.026 | 0.900 | 1.012 | 1.301 | 42.92 | 21.32 | 13 | 19 | 469  | 51.9  | 6.90 |
| Q9UL03 | Armadillo repeat-containing protein 3<br>OS=Homo sapiens<br>GN=ARMC3<br>PE=2 SV=2 - [ARMC3_HUMAN<br>Polypyrimidine tract-binding protein 3<br>OS=Homo sapiens<br>GN=PTBP3<br>PE=1 SV=2 - [PTBP3_HUMAN ]                                  | 2.14  | 1 | 2  | 2  | 4  | 1.040 | 0.984 | 1.002 | 1.301 | 6.87  | 2.14  | 3  | 4  | 887  | 100.3 | 8.62 |
| Q5W041 |                                                                                                                                                                                                                                          | 0.69  | 1 | 1  | 1  | 1  | 1.291 | 0.787 | 1.289 | 1.301 | 1.89  | 0.69  | 1  | 1  | 872  | 96.3  | 6.21 |
| O95758 |                                                                                                                                                                                                                                          | 7.97  | 1 | 2  | 5  | 33 | 1.092 | 1.057 | 1.110 | 1.302 | 92.68 | 7.97  | 7  | 33 | 552  | 59.7  | 9.04 |

|        |                                                                                                           |       |   |    |    |    |       |       |       |       |        |       |    |    |      |       |      |
|--------|-----------------------------------------------------------------------------------------------------------|-------|---|----|----|----|-------|-------|-------|-------|--------|-------|----|----|------|-------|------|
| Q00478 | Butyrophilin subfamily 3 member A3<br>OS=Homo sapiens<br>GN=BTN3A3<br>PE=1 SV=1 - [BTN3A3_HUMAN]          | 8.05  | 3 | 4  | 5  | 13 | 3.191 | 0.997 | 0.722 | 1.302 | 29.59  | 8.05  | 6  | 13 | 584  | 65.0  | 5.53 |
| Q8NEJ9 | Neuroguidin<br>OS=Homo sapiens<br>GN=NGDN<br>PE=1 SV=1 - [NGDN_HUMAN]                                     | 13.97 | 1 | 4  | 4  | 15 | 0.771 | 0.655 | 0.789 | 1.302 | 35.30  | 13.97 | 7  | 15 | 315  | 35.9  | 9.57 |
| Q9H0A0 | N-acetyltransferase 10<br>OS=Homo sapiens<br>GN=NAT10<br>PE=1 SV=2 - [NAT10_HUMAN]                        | 16.20 | 2 | 14 | 15 | 38 | 0.849 | 0.827 | 0.722 | 1.302 | 81.85  | 16.20 | 24 | 38 | 1025 | 115.7 | 8.27 |
| Q8WUZ0 | B-cell CLL/lymphoma 7 protein family member C<br>OS=Homo sapiens<br>GN=BCL7C<br>PE=1 SV=3 - [BCL7C_HUMAN] | 10.14 | 1 | 1  | 2  | 9  | 1.157 | 2.464 | 1.546 | 1.302 | 18.21  | 10.14 | 4  | 9  | 217  | 23.5  | 5.20 |
| Q96LD8 | Sentrin-specific protease 8<br>OS=Homo sapiens<br>GN=SENP8<br>PE=1 SV=1 - [SENP8_HUMAN]                   | 3.30  | 1 | 1  | 1  | 4  | 0.822 | 0.981 | 0.902 | 1.302 | 9.26   | 3.30  | 2  | 4  | 212  | 24.1  | 5.97 |
| P51808 | Dynein light chain Tctex-type 3<br>OS=Homo sapiens<br>GN=DYNLT3<br>PE=1 SV=1 - [DYL3_HUMAN]               | 14.66 | 1 | 1  | 1  | 7  | 1.734 | 0.886 | 1.057 | 1.303 | 22.00  | 14.66 | 2  | 7  | 116  | 13.1  | 5.66 |
| P51003 | Poly(A) polymerase alpha<br>OS=Homo sapiens<br>GN=PAPOLA<br>PE=1 SV=4 - [PAPOA_HUMAN]                     | 3.89  | 2 | 3  | 4  | 7  | 1.046 | 0.882 | 0.850 | 1.303 | 16.08  | 3.89  | 4  | 7  | 745  | 82.8  | 7.37 |
| Q15345 | Leucine-rich repeat-containing protein 41<br>OS=Homo sapiens<br>GN=LRR41<br>PE=1 SV=3 - [LRC41_HUMAN]     | 4.43  | 1 | 2  | 2  | 2  | 1.214 | 1.767 | 1.237 | 1.303 | 9.55   | 4.43  | 2  | 2  | 812  | 88.6  | 8.38 |
| Q14151 | Scaffold attachment factor B2<br>OS=Homo sapiens<br>GN=SAFB2<br>PE=1 SV=1 - [SAFB2_HUMAN]                 | 16.79 | 1 | 10 | 17 | 47 | 1.137 | 1.503 | 1.019 | 1.303 | 100.52 | 16.79 | 27 | 47 | 953  | 107.4 | 6.16 |

|        |                                                                                                            |       |   |    |    |     |       |       |       |       |        |       |    |     |      |       |       |
|--------|------------------------------------------------------------------------------------------------------------|-------|---|----|----|-----|-------|-------|-------|-------|--------|-------|----|-----|------|-------|-------|
| Q9BWS9 | Chitinase domain-containing protein 1<br>OS=Homo sapiens<br>GN=CHID1<br>PE=1 SV=1 - [CHID1_HUMAN]          | 22.14 | 1 | 9  | 9  | 27  | 0.953 | 0.960 | 0.832 | 1.303 | 57.34  | 22.14 | 14 | 27  | 393  | 44.9  | 8.63  |
| Q96QD9 | UAP56-interacting factor<br>OS=Homo sapiens<br>GN=FYTDD1<br>PE=1 SV=3 - [UIF_HUMAN]                        | 8.49  | 1 | 3  | 3  | 6   | 1.315 | 1.133 | 1.271 | 1.303 | 9.76   | 8.49  | 4  | 6   | 318  | 35.8  | 11.78 |
| Q14103 | Heterogeneous nuclear ribonucleoprotein D0<br>OS=Homo sapiens<br>GN=HNRNPD<br>PE=1 SV=1 - [HNRNPD_HUMAN]   | 39.72 | 1 | 16 | 17 | 114 | 1.111 | 1.399 | 1.085 | 1.304 | 311.39 | 39.72 | 27 | 114 | 355  | 38.4  | 7.81  |
| Q9NRY2 | SOSS complex subunit C<br>OS=Homo sapiens<br>GN=INIP<br>PE=1 SV=1 - [SOSSC_HUMAN]                          | 10.58 | 1 | 1  | 1  | 3   | 1.476 | 1.416 | 0.667 | 1.305 | 2.20   | 10.58 | 2  | 3   | 104  | 11.4  | 9.25  |
| Q03252 | Lamin-B2<br>OS=Homo sapiens<br>GN=LMNB2<br>PE=1 SV=3 - [LMNB2_HUMAN]                                       | 53.50 | 1 | 36 | 44 | 285 | 1.144 | 1.366 | 1.019 | 1.305 | 638.21 | 53.50 | 72 | 285 | 600  | 67.6  | 5.35  |
| P56277 | Cx9C motif-containing protein 4<br>OS=Homo sapiens<br>GN=CMC4<br>PE=1 SV=1 - [CMC4_HUMAN]                  | 10.29 | 1 | 1  | 1  | 2   | 1.271 | 1.322 | 1.263 | 1.305 | 4.16   | 10.29 | 1  | 2   | 68   | 7.7   | 8.18  |
| Q6P161 | 39S ribosomal protein L54, mitochondrial<br>OS=Homo sapiens<br>GN=MRPL54<br>PE=1 SV=1 - [RMS4_HUMAN]       | 7.25  | 1 | 1  | 1  | 2   | 0.923 | 1.661 | 1.030 | 1.306 | 2.85   | 7.25  | 2  | 2   | 138  | 15.8  | 9.60  |
| P52655 | Transcription initiation factor IIA subunit 1<br>OS=Homo sapiens<br>GN=GTF2A1<br>PE=1 SV=1 - [TF2AA_HUMAN] | 7.45  | 1 | 2  | 2  | 4   | 0.830 | 1.289 | 0.548 | 1.306 | 10.97  | 7.45  | 4  | 4   | 376  | 41.5  | 4.55  |
| O75376 | Nuclear receptor corepressor 1<br>OS=Homo sapiens<br>GN=NCOR1<br>PE=1 SV=2 - [NCOR1_HUMAN]                 | 5.33  | 2 | 11 | 12 | 21  | 0.985 | 1.134 | 1.009 | 1.306 | 53.73  | 5.33  | 14 | 21  | 2440 | 270.0 | 7.11  |

|        |                                                                                                   |       |   |    |    |     |       |       |       |       |        |       |    |     |      |       |      |
|--------|---------------------------------------------------------------------------------------------------|-------|---|----|----|-----|-------|-------|-------|-------|--------|-------|----|-----|------|-------|------|
| P00491 | Purine nucleoside phosphorylase<br>OS=Homo sapiens<br>GN=PNP PE=1<br>SV=2 - [PNPH_HUMAN]          | 35.29 | 1 | 7  | 8  | 25  | 0.921 | 0.989 | 1.061 | 1.306 | 57.73  | 35.29 | 12 | 25  | 289  | 32.1  | 6.95 |
| Q6ZWT7 | Lysophospholipid acyltransferase 2<br>OS=Homo sapiens<br>GN=MBOAT2<br>PE=2 SV=2 - [MBOA2_HUMAN]   | 5.19  | 1 | 3  | 3  | 5   | 1.065 | 1.900 | 1.522 | 1.306 | 10.30  | 5.19  | 4  | 5   | 520  | 59.5  | 8.03 |
| A1XBS5 | Protein FAM92A1<br>OS=Homo sapiens<br>GN=FAM92A1<br>PE=2 SV=2 - [F92A1_HUMAN]                     | 4.84  | 1 | 2  | 2  | 2   | 1.333 | 0.860 | 0.510 | 1.307 | 3.36   | 4.84  | 2  | 2   | 289  | 33.4  | 6.21 |
| Q9UFW8 | CGG triplet repeat-binding protein 1<br>OS=Homo sapiens<br>GN=CGGBP1<br>PE=1 SV=2 - [CGBP1_HUMAN] | 5.39  | 1 | 1  | 1  | 3   | 1.006 | 1.219 | 1.170 | 1.307 | 0.00   | 5.39  | 1  | 3   | 167  | 18.8  | 8.95 |
| P78524 | Suppression of tumorigenicity 5 protein<br>OS=Homo sapiens<br>GN=ST5 PE=1<br>SV=3 - [ST5_HUMAN]   | 6.24  | 1 | 6  | 6  | 21  | 1.154 | 0.935 | 1.040 | 1.307 | 44.95  | 6.24  | 9  | 21  | 1137 | 126.4 | 9.25 |
| P17010 | Zinc finger X-chromosomal protein<br>OS=Homo sapiens<br>GN=ZFX PE=2<br>SV=2 - [ZFX_HUMAN]         | 4.22  | 3 | 3  | 3  | 9   | 1.078 | 1.612 | 0.964 | 1.307 | 4.67   | 4.22  | 4  | 9   | 805  | 90.5  | 6.14 |
| Q9BYN0 | Sulfiredoxin-1<br>OS=Homo sapiens<br>GN=SRXN1<br>PE=1 SV=2 - [SRXN1_HUMAN]                        | 58.39 | 1 | 6  | 6  | 12  | 1.007 | 0.471 | 1.191 | 1.307 | 41.34  | 58.39 | 10 | 12  | 137  | 14.3  | 8.19 |
| P49411 | Elongation factor Tu, mitochondrial<br>OS=Homo sapiens<br>GN=TUFM<br>PE=1 SV=2 - [EFTU_HUMAN]     | 63.05 | 1 | 26 | 26 | 207 | 1.185 | 1.228 | 1.007 | 1.307 | 634.20 | 63.05 | 42 | 207 | 452  | 49.5  | 7.61 |
| Q9BZ17 | Regulator of nonsense transcripts 3B<br>OS=Homo sapiens<br>GN=UPF3B<br>PE=1 SV=1 - [REN3B_HUMAN]  | 14.91 | 1 | 7  | 7  | 15  | 1.107 | 1.340 | 1.093 | 1.308 | 35.81  | 14.91 | 8  | 15  | 483  | 57.7  | 9.48 |

|        |                                                                                                                  |       |   |    |    |    |       |       |       |       |        |       |    |    |      |       |      |
|--------|------------------------------------------------------------------------------------------------------------------|-------|---|----|----|----|-------|-------|-------|-------|--------|-------|----|----|------|-------|------|
| Q9NVH2 | Integrator complex subunit 7<br>OS=Homo sapiens<br>GN=INTS7<br>PE=1 SV=1 - [INT7_HUMAN]                          | 3.85  | 1 | 3  | 3  | 17 | 1.283 | 1.084 | 0.936 | 1.308 | 17.21  | 3.85  | 5  | 17 | 962  | 106.8 | 8.02 |
| P06746 | DNA polymerase beta<br>OS=Homo sapiens<br>GN=POLB<br>PE=1 SV=3 - [DPOLB_HUMAN]                                   | 11.34 | 1 | 4  | 4  | 18 | 0.984 | 1.554 | 1.497 | 1.308 | 34.90  | 11.34 | 6  | 18 | 335  | 38.2  | 8.95 |
| Q8TDR0 | TRAF3-interacting protein 1<br>OS=Homo sapiens<br>GN=TRAF3IP1<br>PE=1 SV=1 - [MIPT3_HUMAN]                       | 4.49  | 1 | 3  | 4  | 5  | 1.403 | 1.731 | 1.216 | 1.308 | 5.16   | 4.49  | 4  | 5  | 691  | 78.6  | 7.93 |
| O75674 | TOM1-like protein 1<br>OS=Homo sapiens<br>GN=TOM1L1<br>PE=1 SV=2 - [TM1L1_HUMAN]                                 | 3.36  | 1 | 1  | 2  | 3  | 1.366 | 1.006 | 1.314 | 1.309 | 6.38   | 3.36  | 3  | 3  | 476  | 53.0  | 5.24 |
| P98198 | Phospholipid-transporting ATPase ID<br>OS=Homo sapiens<br>GN=ATP8B2<br>PE=1 SV=2 - [AT8B2_HUMAN]                 | 3.47  | 1 | 3  | 3  | 4  | 0.808 | 0.628 | 1.061 | 1.309 | 7.67   | 3.47  | 4  | 4  | 1209 | 137.4 | 7.01 |
| P24539 | ATP synthase F(0) complex subunit B1, mitochondrial<br>OS=Homo sapiens<br>GN=ATP5F1<br>PE=1 SV=2 - [AT5F1_HUMAN] | 39.06 | 1 | 14 | 14 | 86 | 1.222 | 1.060 | 0.942 | 1.309 | 201.50 | 39.06 | 23 | 86 | 256  | 28.9  | 9.36 |
| Q9UBW7 | Zinc finger MYM-type protein 2<br>OS=Homo sapiens<br>GN=ZMYM2<br>PE=1 SV=1 - [ZMYM2_HUMAN]                       | 1.16  | 1 | 1  | 1  | 2  | 1.514 | 1.808 | 1.425 | 1.309 | 4.49   | 1.16  | 2  | 2  | 1377 | 154.8 | 6.34 |
| P39210 | Protein Mpv17<br>OS=Homo sapiens<br>GN=MPV17<br>PE=1 SV=1 - [MPV17_HUMAN]                                        | 4.55  | 1 | 1  | 1  | 3  | 1.192 | 1.210 | 0.754 | 1.309 | 2.13   | 4.55  | 2  | 3  | 176  | 19.7  | 9.47 |
| Q9Y314 | Nitric oxide synthase-interacting protein<br>OS=Homo sapiens<br>GN=NOSIP<br>PE=1 SV=1 - [NOSIP_HUMAN]            | 24.25 | 1 | 7  | 7  | 15 | 1.016 | 1.235 | 1.124 | 1.309 | 36.92  | 24.25 | 10 | 15 | 301  | 33.2  | 8.82 |

|        |                                                                                                             |       |   |    |    |     |       |       |       |       |        |       |    |     |      |       |      |
|--------|-------------------------------------------------------------------------------------------------------------|-------|---|----|----|-----|-------|-------|-------|-------|--------|-------|----|-----|------|-------|------|
| Q92841 | Probable ATP-dependent RNA helicase DDX17<br>OS=Homo sapiens<br>GN=DDX17<br>PE=1 SV=2 - [DDX17_HUMAN]       | 45.54 | 1 | 28 | 35 | 239 | 1.156 | 1.394 | 1.102 | 1.309 | 540.15 | 45.54 | 58 | 239 | 729  | 80.2  | 8.27 |
| Q8NHQ8 | Ras association domain-containing protein 8<br>OS=Homo sapiens<br>GN=RASSF8<br>PE=1 SV=2 - [RASSF8_HUMAN]   | 15.51 | 1 | 6  | 7  | 11  | 1.237 | 1.097 | 1.136 | 1.309 | 21.95  | 15.51 | 9  | 11  | 419  | 48.3  | 6.49 |
| Q9BRD0 | BUD13 homolog<br>OS=Homo sapiens<br>GN=BUD13<br>PE=1 SV=1 - [BUD13_HUMAN]                                   | 1.62  | 1 | 1  | 1  | 1   | 0.888 | 1.299 | 1.132 | 1.310 | 0.00   | 1.62  | 1  | 1   | 619  | 70.5  | 9.86 |
| P25440 | Bromodomain-containing protein 2<br>OS=Homo sapiens<br>GN=BRD2<br>PE=1 SV=2 - [BRD2_HUMAN]                  | 5.12  | 1 | 4  | 4  | 10  | 0.992 | 1.168 | 0.831 | 1.310 | 19.55  | 5.12  | 7  | 10  | 801  | 88.0  | 9.09 |
| Q12789 | General transcription factor 3C polypeptide 1<br>OS=Homo sapiens<br>GN=GTF3C1<br>PE=1 SV=4 - [GTF3C1_HUMAN] | 2.47  | 1 | 5  | 5  | 8   | 0.732 | 1.082 | 0.994 | 1.310 | 15.22  | 2.47  | 6  | 8   | 2109 | 238.7 | 7.30 |
| Q99704 | Docking protein 1<br>OS=Homo sapiens<br>GN=DOK1<br>PE=1 SV=1 - [DOK1_HUMAN]                                 | 6.24  | 1 | 2  | 2  | 6   | 0.572 | 1.165 | 0.711 | 1.310 | 22.06  | 6.24  | 3  | 6   | 481  | 52.4  | 6.47 |
| Q7L775 | EPM2A-interacting protein 1<br>OS=Homo sapiens<br>GN=EPM2AIP1<br>PE=1 SV=1 - [EPMIP_HUMAN]                  | 15.49 | 1 | 6  | 8  | 22  | 1.145 | 1.093 | 1.111 | 1.310 | 58.43  | 15.49 | 12 | 22  | 607  | 70.3  | 6.11 |
| Q01804 | OTU domain-containing protein 4<br>OS=Homo sapiens<br>GN=OTUD4<br>PE=1 SV=4 - [OTUD4_HUMAN]                 | 6.91  | 1 | 5  | 5  | 12  | 1.009 | 1.227 | 1.369 | 1.310 | 25.54  | 6.91  | 8  | 12  | 1114 | 124.0 | 6.71 |

|        |                                                                                                                                   |       |   |    |    |    |       |       |       |       |        |       |    |    |      |       |      |
|--------|-----------------------------------------------------------------------------------------------------------------------------------|-------|---|----|----|----|-------|-------|-------|-------|--------|-------|----|----|------|-------|------|
| Q96HR9 | Receptor<br>expression-<br>enhancing<br>protein 6<br>OS=Homo<br>sapiens<br>GN=REEP6<br>PE=1 SV=1 -<br>[REEP6_HUMAN<br>]           | 5.98  | 1 | 1  | 1  | 2  | 0.787 | 2.331 | 0.546 | 1.310 | 2.35   | 5.98  | 2  | 2  | 184  | 20.7  | 8.56 |
| Q92539 | Phosphatidate<br>phosphatase<br>LPIN2<br>OS=Homo<br>sapiens<br>GN=LPIN2<br>PE=1 SV=1 -<br>[LPIN2_HUMAN]                           | 1.56  | 1 | 1  | 2  | 3  | 0.862 | 0.355 | 0.824 | 1.310 | 6.46   | 1.56  | 2  | 3  | 896  | 99.3  | 5.33 |
| P57737 | Coronin-7<br>OS=Homo<br>sapiens<br>GN=CORO7<br>PE=1 SV=2 -<br>[CORO7_HUMA<br>N]                                                   | 8.86  | 1 | 7  | 7  | 9  | 1.542 | 0.866 | 0.944 | 1.311 | 24.60  | 8.86  | 9  | 9  | 925  | 100.5 | 5.80 |
| Q5RKV6 | Exosome<br>complex<br>component<br>MTR3<br>OS=Homo<br>sapiens<br>GN=EXOSC6<br>PE=1 SV=1 -<br>[EXOS6_HUMA<br>N]                    | 30.15 | 1 | 6  | 6  | 16 | 1.383 | 1.332 | 0.954 | 1.311 | 39.97  | 30.15 | 10 | 16 | 272  | 28.2  | 6.28 |
| Q86WA6 | Valacyclovir<br>hydrolase<br>OS=Homo<br>sapiens<br>GN=BPHL PE=1<br>SV=1 -<br>[BPHL_HUMAN]                                         | 20.27 | 1 | 7  | 7  | 11 | 1.587 | 1.544 | 1.303 | 1.311 | 27.70  | 20.27 | 8  | 11 | 291  | 32.5  | 9.14 |
| Q9P2N5 | RNA-binding<br>protein 27<br>OS=Homo<br>sapiens<br>GN=RBM27<br>PE=1 SV=2 -<br>[RBM27_HUMA<br>N]                                   | 5.57  | 1 | 5  | 5  | 11 | 1.167 | 1.543 | 1.043 | 1.311 | 23.04  | 5.57  | 6  | 11 | 1060 | 118.6 | 9.19 |
| Q15031 | Probable<br>leucine--tRNA<br>ligase,<br>mitochondrial<br>OS=Homo<br>sapiens<br>GN=LARS2<br>PE=1 SV=2 -<br>[SYLM_HUMAN]            | 6.98  | 1 | 6  | 6  | 14 | 1.106 | 1.061 | 0.996 | 1.311 | 11.40  | 6.98  | 11 | 14 | 903  | 101.9 | 8.22 |
| P37198 | Nuclear pore<br>glycoprotein<br>p62 OS=Homo<br>sapiens<br>GN=NUP62<br>PE=1 SV=3 -<br>[NUP62_HUMAN<br>]                            | 16.86 | 1 | 8  | 8  | 78 | 1.349 | 1.460 | 0.939 | 1.311 | 258.44 | 16.86 | 15 | 78 | 522  | 53.2  | 5.31 |
| O00534 | von Willebrand<br>factor A<br>domain-<br>containing<br>protein 5A<br>OS=Homo<br>sapiens<br>GN=VWA5A<br>PE=2 SV=2 -<br>[VMA5A_HUMA | 22.39 | 1 | 16 | 16 | 38 | 1.915 | 0.684 | 0.572 | 1.311 | 93.08  | 22.39 | 27 | 38 | 786  | 86.4  | 6.58 |



|        |                                                                                                                 |       |   |    |    |     |       |       |       |       |        |       |    |     |      |       |       |
|--------|-----------------------------------------------------------------------------------------------------------------|-------|---|----|----|-----|-------|-------|-------|-------|--------|-------|----|-----|------|-------|-------|
| Q6ZMC9 | Sialic acid-binding Ig-like lectin 15<br>OS=Homo sapiens<br>GN=SIGLEC15<br>PE=1 SV=1 - [SIG15_HUMAN]            | 1.83  | 1 | 1  | 1  | 1   | 0.967 | 1.472 | 1.006 | 1.312 | 2.28   | 1.83  | 1  | 1   | 328  | 35.6  | 8.51  |
| Q16594 | Transcription initiation factor TFIID subunit 9<br>OS=Homo sapiens<br>GN=TAF9<br>PE=1 SV=1 - [TAF9_HUMAN]       | 10.61 | 2 | 3  | 3  | 5   | 1.073 | 0.793 | 1.129 | 1.312 | 6.58   | 10.61 | 4  | 5   | 264  | 29.0  | 8.66  |
| Q9BPZ3 | Polyadenylate-binding protein-interacting protein 2<br>OS=Homo sapiens<br>GN=PAIP2<br>PE=1 SV=1 - [PAIP2_HUMAN] | 11.02 | 1 | 1  | 1  | 2   | 1.249 | 0.708 | 0.691 | 1.312 | 8.20   | 11.02 | 2  | 2   | 127  | 15.0  | 4.12  |
| Q14669 | E3 ubiquitin-protein ligase TRIP12<br>OS=Homo sapiens<br>GN=TRIP12<br>PE=1 SV=1 - [TRIPC_HUMAN]                 | 7.13  | 1 | 12 | 12 | 33  | 0.830 | 0.994 | 0.952 | 1.313 | 82.76  | 7.13  | 20 | 33  | 1992 | 220.3 | 8.48  |
| Q12840 | Kinesin heavy chain isoform 5A<br>OS=Homo sapiens<br>GN=KIF5A<br>PE=1 SV=2 - [KIF5A_HUMAN]                      | 10.08 | 1 | 2  | 9  | 39  | 1.230 | 1.016 | 0.972 | 1.314 | 108.81 | 10.08 | 14 | 39  | 1032 | 117.3 | 5.90  |
| P98164 | Low-density lipoprotein receptor-related protein 2<br>OS=Homo sapiens<br>GN=LRP2<br>PE=1 SV=3 - [LRP2_HUMAN]    | 0.39  | 1 | 1  | 2  | 2   | 0.834 | 0.757 | 1.152 | 1.314 | 5.58   | 0.39  | 2  | 2   | 4655 | 521.6 | 5.08  |
| Q9BVC6 | Transmembrane protein 109<br>OS=Homo sapiens<br>GN=TMEM109<br>PE=1 SV=1 - [TM109_HUMAN]                         | 9.47  | 1 | 5  | 5  | 23  | 1.374 | 1.431 | 1.702 | 1.314 | 60.09  | 9.47  | 9  | 23  | 243  | 26.2  | 10.48 |
| P55209 | Nucleosome assembly protein 1-like 1<br>OS=Homo sapiens<br>GN=NAP1L1<br>PE=1 SV=1 - [NP1L1_HUMAN]               | 39.90 | 1 | 9  | 11 | 198 | 0.876 | 1.004 | 1.033 | 1.314 | 577.01 | 39.90 | 16 | 198 | 391  | 45.3  | 4.46  |
| Q15773 | Myeloid leukemia factor 2<br>OS=Homo sapiens<br>GN=MLF2<br>PE=1 SV=1 - [MLF2_HUMAN]                             | 4.84  | 1 | 1  | 1  | 2   | 0.825 | 1.055 | 1.313 | 1.315 | 3.57   | 4.84  | 2  | 2   | 248  | 28.1  | 6.90  |

|        |                                                                                                             |       |   |    |    |     |       |       |       |       |        |       |    |     |      |       |       |
|--------|-------------------------------------------------------------------------------------------------------------|-------|---|----|----|-----|-------|-------|-------|-------|--------|-------|----|-----|------|-------|-------|
| Q96AP7 | Endothelial cell-selective adhesion molecule<br>OS=Homo sapiens<br>GN=ESAM<br>PE=1 SV=1 - [ESAM_HUMAN]      | 2.82  | 1 | 1  | 1  | 1   | 0.960 | 1.541 | 1.851 | 1.315 | 0.00   | 2.82  | 1  | 1   | 390  | 41.2  | 9.32  |
| Q5VSP4 | Putative lipocalin 1-like protein 1<br>OS=Homo sapiens<br>GN=LCN1P1<br>PE=5 SV=1 - [LC1L1_HUMAN]            | 6.79  | 2 | 1  | 1  | 2   | 0.148 | 1.242 | 1.052 | 1.315 | 0.00   | 6.79  | 2  | 2   | 162  | 17.9  | 5.00  |
| Q6ZR62 | Zinc finger CCHC domain-containing protein 16<br>OS=Homo sapiens<br>GN=ZCCHC16<br>PE=2 SV=2 - [ZCH16_HUMAN] | 3.23  | 1 | 1  | 1  | 1   | 0.932 | 1.007 | 0.898 | 1.315 | 3.03   | 3.23  | 1  | 1   | 310  | 34.7  | 5.80  |
| Q8WUY8 | N-acetyltransferase 14<br>OS=Homo sapiens<br>GN=NAT14<br>PE=1 SV=1 - [NAT14_HUMAN]                          | 16.02 | 1 | 3  | 3  | 4   | 1.395 | 0.958 | 0.803 | 1.315 | 4.58   | 16.02 | 4  | 4   | 206  | 21.6  | 10.74 |
| Q14957 | Glutamate receptor ionotropic, NMDA 2C<br>OS=Homo sapiens<br>GN=GRIN2C<br>PE=1 SV=3 - [NMDE3_HUMAN]         | 0.89  | 1 | 1  | 1  | 1   | 0.746 | 1.334 | 0.891 | 1.315 | 0.00   | 0.89  | 1  | 1   | 1233 | 134.1 | 8.48  |
| O43464 | Serine protease HTRA2, mitochondrial<br>OS=Homo sapiens<br>GN=HTRA2<br>PE=1 SV=2 - [HTRA2_HUMAN]            | 27.29 | 2 | 8  | 8  | 22  | 1.050 | 1.353 | 1.157 | 1.316 | 61.68  | 27.29 | 13 | 22  | 458  | 48.8  | 10.07 |
| P52597 | Heterogeneous nuclear ribonucleoprotein F<br>OS=Homo sapiens<br>GN=HNRNPF<br>PE=1 SV=3 - [HNRPF_HUMAN]      | 44.34 | 1 | 11 | 13 | 116 | 1.107 | 1.520 | 1.034 | 1.316 | 334.62 | 44.34 | 21 | 116 | 415  | 45.6  | 5.58  |
| Q92504 | Zinc transporter SLC39A7<br>OS=Homo sapiens<br>GN=SLC39A7<br>PE=1 SV=2 - [S39A7_HUMAN]                      | 2.99  | 1 | 2  | 2  | 18  | 1.235 | 1.109 | 0.861 | 1.316 | 32.78  | 2.99  | 3  | 18  | 469  | 50.1  | 6.87  |

|        |                                                                                                                                   |       |   |    |    |    |       |       |       |       |        |       |    |    |      |       |      |
|--------|-----------------------------------------------------------------------------------------------------------------------------------|-------|---|----|----|----|-------|-------|-------|-------|--------|-------|----|----|------|-------|------|
| O75306 | NADH dehydrogenase [ubiquinone] iron-sulfur protein 2, mitochondrial<br>OS=Homo sapiens<br>GN=NDUFS2<br>PE=1 SV=2 - [NDUS2_HUMAN] | 28.29 | 1 | 10 | 10 | 38 | 0.820 | 1.299 | 0.965 | 1.316 | 113.14 | 28.29 | 14 | 38 | 463  | 52.5  | 7.55 |
| Q9Y6N7 | Roundabout homolog 1<br>OS=Homo sapiens<br>GN=ROBO1<br>PE=1 SV=1 - [ROBO1_HUMAN]                                                  | 8.84  | 1 | 10 | 10 | 23 | 1.553 | 0.904 | 1.005 | 1.316 | 26.42  | 8.84  | 14 | 23 | 1651 | 180.8 | 6.04 |
| Q8N6R0 | Methyltransferase-like protein 13<br>OS=Homo sapiens<br>GN=METTL3<br>PE=1 SV=1 - [MET13_HUMAN]                                    | 3.86  | 1 | 3  | 3  | 7  | 0.801 | 0.802 | 1.022 | 1.316 | 16.02  | 3.86  | 4  | 7  | 699  | 78.7  | 6.73 |
| B7ZAP0 | Rab GTPase-activating protein 1-like, isoform 10<br>OS=Homo sapiens<br>GN=RABGAP1L<br>PE=1 SV=1 - [RBG10_HUMAN]                   | 14.62 | 1 | 1  | 3  | 4  | 2.224 | 5.234 | 6.990 | 1.317 | 6.88   | 14.62 | 4  | 4  | 253  | 29.0  | 5.33 |
| Q9BXL7 | Caspase recruitment domain-containing protein 11<br>OS=Homo sapiens<br>GN=CARD11<br>PE=1 SV=3 - [CAR11_HUMAN]                     | 0.69  | 1 | 1  | 1  | 1  | 1.838 | 2.766 | 1.965 | 1.317 | 2.49   | 0.69  | 1  | 1  | 1154 | 133.2 | 6.09 |
| O94760 | N(G),N(G)-dimethylarginine dimethylaminohydrolase 1<br>OS=Homo sapiens<br>GN=DDAH1<br>PE=1 SV=3 - [DDAH1_HUMAN]                   | 56.14 | 1 | 10 | 11 | 52 | 1.185 | 1.109 | 0.755 | 1.317 | 141.46 | 56.14 | 19 | 52 | 285  | 31.1  | 5.81 |
| Q8TAQ2 | SWI/SNF complex subunit SMARCC2<br>OS=Homo sapiens<br>GN=SMARCC2<br>PE=1 SV=1 - [SMRC2_HUMAN]                                     | 17.05 | 1 | 12 | 18 | 62 | 1.268 | 1.612 | 1.322 | 1.317 | 157.87 | 17.05 | 26 | 62 | 1214 | 132.8 | 5.69 |
| P19419 | ETS domain-containing protein Elk-1<br>OS=Homo sapiens<br>GN=ELK1 PE=1 SV=2 - [ELK1_HUMAN]                                        | 5.61  | 1 | 2  | 2  | 6  | 0.578 | 0.967 | 1.020 | 1.318 | 11.90  | 5.61  | 3  | 6  | 428  | 44.9  | 6.89 |

|        |                                                                                                               |       |   |    |    |     |       |       |       |       |        |       |     |     |      |       |      |
|--------|---------------------------------------------------------------------------------------------------------------|-------|---|----|----|-----|-------|-------|-------|-------|--------|-------|-----|-----|------|-------|------|
| Q9Y3T6 | R3H and coiled-coil domain-containing protein 1<br>OS=Homo sapiens<br>GN=R3HCC1<br>PE=1 SV=2 - [R3HCL1_HUMAN] | 11.46 | 1 | 3  | 3  | 6   | 1.373 | 1.428 | 1.353 | 1.318 | 5.43   | 11.46 | 4   | 6   | 480  | 53.2  | 6.27 |
| Q9BVL2 | Nudeoporin p58/p45<br>OS=Homo sapiens<br>GN=NUPL1<br>PE=1 SV=1 - [NUPL1_HUMAN]                                | 6.34  | 1 | 5  | 5  | 14  | 1.141 | 1.064 | 0.921 | 1.318 | 18.45  | 6.34  | 7   | 14  | 599  | 60.9  | 9.33 |
| A8MW92 | PHD finger protein 20-like protein 1<br>OS=Homo sapiens<br>GN=PHF20L1<br>PE=1 SV=2 - [P20L1_HUMAN]            | 1.97  | 1 | 2  | 2  | 2   | 1.988 | 1.838 | 0.619 | 1.318 | 4.89   | 1.97  | 2   | 2   | 1017 | 114.9 | 6.83 |
| Q14393 | Growth arrest-specific protein 6<br>OS=Homo sapiens<br>GN=GAS6<br>PE=1 SV=2 - [GAS6_HUMAN]                    | 6.10  | 1 | 4  | 4  | 10  | 0.681 | 0.931 | 0.669 | 1.318 | 27.53  | 6.10  | 6   | 10  | 721  | 79.6  | 6.21 |
| P10109 | Adrenodoxin, mitochondrial<br>OS=Homo sapiens<br>GN=FDX1<br>PE=1 SV=1 - [ADX_HUMAN]                           | 27.72 | 1 | 4  | 4  | 6   | 0.731 | 1.042 | 1.346 | 1.318 | 15.17  | 27.72 | 5   | 6   | 184  | 19.4  | 5.83 |
| P12270 | Nudeoprotein TPR<br>OS=Homo sapiens<br>GN=TPR<br>PE=1 SV=3 - [TPR_HUMAN]                                      | 38.21 | 2 | 84 | 89 | 320 | 1.166 | 1.253 | 0.956 | 1.318 | 742.87 | 38.21 | 136 | 320 | 2363 | 267.1 | 5.02 |
| Q8NEV4 | Myosin-IIIa<br>OS=Homo sapiens<br>GN=MYO3A<br>PE=2 SV=2 - [MYO3A_HUMAN]                                       | 0.93  | 1 | 2  | 2  | 2   | 2.060 | 0.215 | 0.339 | 1.319 | 2.27   | 0.93  | 2   | 2   | 1616 | 186.1 | 8.91 |
| Q9H9T3 | Elongator complex protein 3<br>OS=Homo sapiens<br>GN=ELP3<br>PE=1 SV=2 - [ELP3_HUMAN]                         | 5.30  | 1 | 3  | 3  | 10  | 0.598 | 1.161 | 1.095 | 1.319 | 18.78  | 5.30  | 5   | 10  | 547  | 62.2  | 8.88 |
| Q0D2K2 | Kelch-like protein 30<br>OS=Homo sapiens<br>GN=KLHL30<br>PE=2 SV=3 - [KLHL30_HUMAN]                           | 4.50  | 1 | 1  | 1  | 2   | 2.666 | 1.089 | 0.960 | 1.320 | 5.08   | 4.50  | 1   | 2   | 578  | 63.9  | 5.94 |
| Q8IVL5 | Prolyl 3-hydroxylase 2<br>OS=Homo sapiens<br>GN=LEPREL1<br>PE=1 SV=1 - [P3H2_HUMAN]                           | 29.10 | 1 | 14 | 16 | 54  | 1.756 | 0.447 | 0.809 | 1.320 | 146.30 | 29.10 | 26  | 54  | 708  | 80.9  | 5.71 |

|        |                                                                                                                            |       |   |    |    |     |       |       |       |       |        |       |    |     |     |      |      |
|--------|----------------------------------------------------------------------------------------------------------------------------|-------|---|----|----|-----|-------|-------|-------|-------|--------|-------|----|-----|-----|------|------|
| Q9Y605 | MORF4 family-associated protein 1<br>OS=Homo sapiens<br>GN=MRFAP1<br>PE=1 SV=1 - [MOFA1_HUMAN]                             | 25.20 | 1 | 2  | 2  | 8   | 0.766 | 0.868 | 1.025 | 1.320 | 16.35  | 25.20 | 4  | 8   | 127 | 14.6 | 4.70 |
| O75914 | Serine/threonine-protein kinase PAK 3<br>OS=Homo sapiens<br>GN=PAK3<br>PE=1 SV=2 - [PAK3_HUMAN]                            | 9.66  | 1 | 1  | 5  | 33  | 0.748 | 1.823 | 2.085 | 1.321 | 73.58  | 9.66  | 9  | 33  | 559 | 62.3 | 5.45 |
| P17844 | Probable ATP-dependent RNA helicase DDX5<br>OS=Homo sapiens<br>GN=DDX5<br>PE=1 SV=1 - [DDX5_HUMAN]                         | 39.58 | 1 | 23 | 30 | 204 | 1.159 | 1.073 | 0.884 | 1.321 | 448.38 | 39.58 | 46 | 204 | 614 | 69.1 | 8.92 |
| O60476 | Mannosyl-oligosaccharide 1,2-alpha-mannosidase IB<br>OS=Homo sapiens<br>GN=MAN1A2<br>PE=1 SV=1 - [MA1A2_HUMAN]             | 7.02  | 1 | 4  | 5  | 9   | 0.887 | 1.338 | 1.049 | 1.321 | 21.12  | 7.02  | 6  | 9   | 641 | 73.0 | 7.61 |
| Q8NB16 | Mixed lineage kinase domain-like protein<br>OS=Homo sapiens<br>GN=MLKL PE=1 SV=1 - [MLKL_HUMAN]                            | 7.86  | 1 | 5  | 5  | 7   | 1.091 | 0.902 | 1.012 | 1.321 | 11.17  | 7.86  | 6  | 7   | 471 | 54.4 | 8.82 |
| P31153 | S-adenosylmethionine synthase isoform type-2<br>OS=Homo sapiens<br>GN=MAT2A<br>PE=1 SV=1 - [METK2_HUMAN]                   | 36.20 | 2 | 14 | 14 | 52  | 0.960 | 0.849 | 0.918 | 1.321 | 138.62 | 36.20 | 23 | 52  | 395 | 43.6 | 6.48 |
| Q9BUL5 | PHD finger protein 23<br>OS=Homo sapiens<br>GN=PHF23<br>PE=1 SV=1 - [PHF23_HUMAN]                                          | 6.20  | 1 | 2  | 2  | 6   | 1.021 | 1.825 | 1.316 | 1.321 | 14.69  | 6.20  | 4  | 6   | 403 | 43.8 | 5.78 |
| Q9BVV7 | Mitochondrial import inner membrane translocase subunit Tim21<br>OS=Homo sapiens<br>GN=TIMM21<br>PE=1 SV=1 - [TIM21_HUMAN] | 25.40 | 1 | 7  | 7  | 14  | 1.144 | 0.924 | 0.738 | 1.321 | 31.22  | 25.40 | 12 | 14  | 248 | 28.2 | 9.70 |

|        |                                                                                                         |       |   |    |    |    |       |       |       |       |       |       |    |    |     |       |       |
|--------|---------------------------------------------------------------------------------------------------------|-------|---|----|----|----|-------|-------|-------|-------|-------|-------|----|----|-----|-------|-------|
| Q8N108 | Mesoderm induction early response protein 1<br>OS=Homo sapiens<br>GN=MIER1<br>PE=1 SV=2 - [MIER1_HUMAN] | 1.76  | 1 | 1  | 1  | 1  | 1.367 | 1.016 | 1.362 | 1.322 | 0.00  | 1.76  | 1  | 1  | 512 | 57.9  | 4.42  |
| Q13573 | SNW domain-containing protein 1<br>OS=Homo sapiens<br>GN=SNW1<br>PE=1 SV=1 - [SNW1_HUMAN]               | 19.03 | 1 | 10 | 10 | 41 | 1.173 | 1.532 | 0.976 | 1.322 | 74.21 | 19.03 | 18 | 41 | 536 | 61.5  | 9.52  |
| O75676 | Ribosomal protein S6 kinase alpha-4<br>OS=Homo sapiens<br>GN=RPS6KA4<br>PE=1 SV=1 - [KSGA4_HUMAN]       | 3.11  | 1 | 2  | 2  | 4  | 1.121 | 1.429 | 1.291 | 1.322 | 9.59  | 3.11  | 3  | 4  | 772 | 85.6  | 8.28  |
| P50747 | Biotin--protein ligase<br>OS=Homo sapiens<br>GN=HLCS PE=1 SV=1 - [BPL1_HUMAN]                           | 4.96  | 1 | 3  | 3  | 9  | 1.372 | 1.207 | 1.179 | 1.322 | 13.49 | 4.96  | 6  | 9  | 726 | 80.7  | 5.62  |
| Q13084 | 39S ribosomal protein L28, mitochondrial<br>OS=Homo sapiens<br>GN=MRPL28<br>PE=1 SV=4 - [RM28_HUMAN]    | 21.48 | 1 | 4  | 4  | 5  | 1.376 | 1.144 | 0.956 | 1.323 | 15.66 | 21.48 | 4  | 5  | 256 | 30.1  | 8.29  |
| Q03519 | Antigen peptide transporter 2<br>OS=Homo sapiens<br>GN=TAP2<br>PE=1 SV=1 - [TAP2_HUMAN]                 | 12.83 | 1 | 8  | 8  | 14 | 2.232 | 0.766 | 0.921 | 1.323 | 33.46 | 12.83 | 11 | 14 | 686 | 75.6  | 8.02  |
| P18858 | DNA ligase 1<br>OS=Homo sapiens<br>GN=LIG1 PE=1 SV=1 - [DNL1_HUMAN]                                     | 2.07  | 1 | 2  | 2  | 2  | 1.082 | 0.685 | 0.765 | 1.323 | 4.12  | 2.07  | 2  | 2  | 919 | 101.7 | 5.62  |
| P17275 | Transcription factor jun-B<br>OS=Homo sapiens<br>GN=JUNB PE=1 SV=1 - [JUNB_HUMAN]                       | 7.20  | 1 | 2  | 2  | 5  | 0.875 | 0.999 | 0.878 | 1.324 | 4.64  | 7.20  | 4  | 5  | 347 | 35.9  | 9.22  |
| Q86Y79 | Probable peptidyl-trRNA hydrolase<br>OS=Homo sapiens<br>GN=PTRH1<br>PE=1 SV=1 - [PTH_HUMAN]             | 4.67  | 1 | 1  | 1  | 2  | 1.488 | 1.287 | 1.042 | 1.324 | 9.05  | 4.67  | 2  | 2  | 214 | 22.9  | 10.56 |

|        |                                                                                                                       |       |   |    |    |    |       |       |       |       |        |       |    |    |      |       |      |
|--------|-----------------------------------------------------------------------------------------------------------------------|-------|---|----|----|----|-------|-------|-------|-------|--------|-------|----|----|------|-------|------|
| P98175 | RNA-binding protein 10<br>OS=Homo sapiens<br>GN=RBM10<br>PE=1 SV=3 - [RBM10_HUMAN]                                    | 16.34 | 1 | 13 | 15 | 30 | 1.288 | 1.039 | 1.011 | 1.324 | 68.51  | 16.34 | 22 | 30 | 930  | 103.5 | 5.97 |
| O15116 | U6 snRNA-associated Sm-like protein<br>LSM1<br>OS=Homo sapiens<br>GN=LSM1<br>PE=1 SV=1 - [LSM1_HUMAN]                 | 9.77  | 1 | 2  | 2  | 2  | 1.671 | 1.145 | 1.325 | 1.324 | 4.50   | 9.77  | 2  | 2  | 133  | 15.2  | 5.22 |
| Q9BYX4 | Interferon-induced helicase C domain-containing protein 1<br>OS=Homo sapiens<br>GN=IFIH1<br>PE=1 SV=3 - [IFIH1_HUMAN] | 1.46  | 1 | 1  | 1  | 1  | 1.288 | 1.049 | 1.213 | 1.325 | 2.85   | 1.46  | 1  | 1  | 1025 | 116.6 | 5.52 |
| O00422 | Histone deacetylase complex subunit SAP18<br>OS=Homo sapiens<br>GN=SAP18<br>PE=1 SV=1 - [SAP18_HUMAN]                 | 50.98 | 1 | 8  | 8  | 38 | 0.960 | 1.278 | 0.838 | 1.325 | 86.55  | 50.98 | 13 | 38 | 153  | 17.5  | 9.35 |
| Q13636 | Ras-related protein Rab-31<br>OS=Homo sapiens<br>GN=RAB31<br>PE=1 SV=1 - [RAB31_HUMAN]                                | 21.65 | 1 | 3  | 4  | 13 | 0.750 | 0.685 | 0.878 | 1.325 | 32.47  | 21.65 | 7  | 13 | 194  | 21.6  | 7.06 |
| P35226 | Polycomb complex protein BMI-1<br>OS=Homo sapiens<br>GN=BMI1<br>PE=1 SV=2 - [BMI1_HUMAN]                              | 5.21  | 1 | 1  | 1  | 1  | 0.766 | 1.457 | 1.608 | 1.325 | 3.41   | 5.21  | 1  | 1  | 326  | 36.9  | 8.63 |
| P29590 | Protein PML<br>OS=Homo sapiens<br>GN=PML PE=1 SV=3 - [PML_HUMAN]                                                      | 26.64 | 1 | 23 | 23 | 98 | 1.729 | 1.009 | 1.034 | 1.325 | 214.52 | 26.64 | 39 | 98 | 882  | 97.5  | 6.21 |
| P51532 | Transcription activator BRG1<br>OS=Homo sapiens<br>GN=SMARCA4<br>PE=1 SV=2 - [SMCA4_HUMAN]                            | 10.44 | 1 | 9  | 17 | 50 | 1.326 | 1.294 | 0.929 | 1.326 | 136.13 | 10.44 | 25 | 50 | 1647 | 184.5 | 7.88 |
| P0C7P3 | Schlafen family member 14<br>OS=Homo sapiens<br>GN=SLFN14<br>PE=2 SV=2 - [SLN14_HUMAN]                                | 0.99  | 1 | 1  | 1  | 1  | 0.755 | 0.798 | 0.977 | 1.326 | 0.00   | 0.99  | 1  | 1  | 912  | 103.8 | 8.24 |

|        |                                                                                                                                   |       |    |    |    |     |       |       |       |       |         |       |    |     |     |      |       |
|--------|-----------------------------------------------------------------------------------------------------------------------------------|-------|----|----|----|-----|-------|-------|-------|-------|---------|-------|----|-----|-----|------|-------|
| P37837 | Transaldolase<br>OS=Homo sapiens<br>GN=TALDO1<br>PE=1 SV=2 - [TALDO_HUMAN]                                                        | 52.52 | 1  | 24 | 24 | 512 | 1.392 | 0.632 | 1.052 | 1.326 | 1287.85 | 52.52 | 41 | 512 | 337 | 37.5 | 6.81  |
| Q8WZA1 | Protein O-linked-mannose beta-1,2-N-acetylglucosaminyltransferase<br>1 OS=Homo sapiens<br>GN=POMGNT1<br>PE=1 SV=2 - [PMGT1_HUMAN] | 1.36  | 1  | 1  | 1  | 2   | 0.637 | 1.855 | 1.230 | 1.326 | 4.43    | 1.36  | 2  | 2   | 660 | 75.2 | 6.83  |
| Q7L8L6 | FAST kinase domain-containing protein 5<br>OS=Homo sapiens<br>GN=FASTKD5<br>PE=1 SV=1 - [FAKD5_HUMAN]                             | 2.62  | 1  | 2  | 2  | 5   | 0.960 | 0.918 | 0.799 | 1.326 | 10.20   | 2.62  | 4  | 5   | 764 | 86.5 | 8.13  |
| P15621 | Zinc finger protein 44<br>OS=Homo sapiens<br>GN=ZNF44<br>PE=2 SV=3 - [ZNF44_HUMAN]                                                | 6.79  | 28 | 1  | 2  | 3   | 0.824 | 0.735 | 1.208 | 1.327 | 2.55    | 6.79  | 2  | 3   | 663 | 76.5 | 8.68  |
| Q9Y394 | Dehydrogenase/reductase SDR family member 7<br>OS=Homo sapiens<br>GN=DHRS7<br>PE=1 SV=1 - [DHRS7_HUMAN]                           | 28.61 | 1  | 10 | 10 | 54  | 1.336 | 1.007 | 1.036 | 1.327 | 110.16  | 28.61 | 17 | 54  | 339 | 38.3 | 8.32  |
| Q8WVW9 | Heterogeneous nuclear ribonucleoprotein L-like<br>OS=Homo sapiens<br>GN=HNRNPLL<br>PE=1 SV=1 - [HNRLL_HUMAN]                      | 22.14 | 1  | 9  | 10 | 45  | 1.132 | 1.266 | 1.066 | 1.327 | 105.41  | 22.14 | 18 | 45  | 542 | 60.0 | 7.72  |
| Q9NP92 | 28S ribosomal protein S30, mitochondrial<br>OS=Homo sapiens<br>GN=MRPS30<br>PE=1 SV=2 - [RT30_HUMAN]                              | 5.92  | 1  | 2  | 2  | 5   | 1.277 | 1.343 | 1.141 | 1.327 | 8.18    | 5.92  | 3  | 5   | 439 | 50.3 | 7.97  |
| O95563 | Mitochondrial pyruvate carrier 2<br>OS=Homo sapiens<br>GN=MPC2<br>PE=1 SV=1 - [MPC2_HUMAN]                                        | 9.45  | 1  | 1  | 1  | 2   | 1.367 | 0.874 | 0.770 | 1.328 | 0.00    | 9.45  | 2  | 2   | 127 | 14.3 | 10.43 |
| Q8N983 | 39S ribosomal protein L43, mitochondrial<br>OS=Homo sapiens<br>GN=MRPL43<br>PE=1 SV=1 - [RM43_HUMAN]                              | 13.49 | 1  | 3  | 3  | 19  | 0.870 | 1.242 | 1.021 | 1.328 | 37.23   | 13.49 | 4  | 19  | 215 | 23.4 | 8.65  |



|        |                                                                                                                  |       |   |    |    |    |       |       |       |       |        |       |    |    |      |       |       |
|--------|------------------------------------------------------------------------------------------------------------------|-------|---|----|----|----|-------|-------|-------|-------|--------|-------|----|----|------|-------|-------|
| Q8TDM6 | Disk large homolog 5<br>OS=Homo sapiens<br>GN=DLG5 PE=1 SV=4 - [DLG5_HUMAN]                                      | 3.60  | 1 | 7  | 7  | 16 | 0.877 | 0.930 | 1.155 | 1.328 | 40.55  | 3.60  | 9  | 16 | 1919 | 213.7 | 7.42  |
| Q68CQ4 | Digestive organ expansion factor homolog<br>OS=Homo sapiens<br>GN=DIEXF PE=1 SV=2 - [DIEXF_HUMAN]                | 3.84  | 1 | 3  | 3  | 6  | 0.875 | 0.917 | 1.084 | 1.328 | 5.33   | 3.84  | 5  | 6  | 756  | 87.0  | 5.88  |
| P07311 | Acylphosphatase-1<br>OS=Homo sapiens<br>GN=ACYP1 PE=1 SV=2 - [ACYP1_HUMAN]                                       | 39.39 | 1 | 4  | 4  | 8  | 1.239 | 1.910 | 1.140 | 1.328 | 21.97  | 39.39 | 5  | 8  | 99   | 11.3  | 9.31  |
| Q9BYC8 | 39S ribosomal protein L32, mitochondrial<br>OS=Homo sapiens<br>GN=MRPL32 PE=1 SV=1 - [RM32_HUMAN]                | 12.23 | 1 | 1  | 1  | 4  | 1.345 | 1.614 | 0.894 | 1.328 | 15.34  | 12.23 | 2  | 4  | 188  | 21.4  | 9.73  |
| B2RTY4 | Unconventional myosin-IXa<br>OS=Homo sapiens<br>GN=MYO9A PE=1 SV=2 - [MYO9A_HUMAN]                               | 2.43  | 1 | 3  | 4  | 4  | 1.563 | 1.361 | 1.079 | 1.328 | 0.00   | 2.43  | 4  | 4  | 2548 | 292.5 | 8.88  |
| O95466 | Formin-like protein 1<br>OS=Homo sapiens<br>GN=FMNL1 PE=1 SV=3 - [FMNL_HUMAN]                                    | 4.64  | 1 | 4  | 5  | 6  | 1.570 | 0.640 | 0.510 | 1.329 | 8.27   | 4.64  | 6  | 6  | 1100 | 121.8 | 5.72  |
| O75746 | Calcium-binding mitochondrial carrier protein Aralar1<br>OS=Homo sapiens<br>GN=SLC25A12 PE=1 SV=2 - [CMC1_HUMAN] | 24.34 | 1 | 10 | 14 | 54 | 1.410 | 1.200 | 1.106 | 1.329 | 123.69 | 24.34 | 22 | 54 | 678  | 74.7  | 8.38  |
| Q9UPT8 | Zinc finger CCH domain-containing protein 4<br>OS=Homo sapiens<br>GN=ZC3H4 PE=1 SV=3 - [ZC3H4_HUMAN]             | 7.98  | 1 | 7  | 7  | 27 | 1.238 | 1.661 | 1.117 | 1.329 | 63.81  | 7.98  | 10 | 27 | 1303 | 140.2 | 6.27  |
| P38159 | RNA-binding motif protein, X chromosome<br>OS=Homo sapiens<br>GN=RBMX PE=1 SV=3 - [RBMX_HUMAN]                   | 31.20 | 2 | 5  | 13 | 75 | 1.304 | 1.769 | 1.336 | 1.329 | 174.14 | 31.20 | 21 | 75 | 391  | 42.3  | 10.05 |

|        |                                                                                                                                                                                         |       |   |    |    |    |       |       |       |       |        |       |    |    |     |       |      |
|--------|-----------------------------------------------------------------------------------------------------------------------------------------------------------------------------------------|-------|---|----|----|----|-------|-------|-------|-------|--------|-------|----|----|-----|-------|------|
| Q02790 | Peptidyl-prolyl<br>cis-trans<br>isomerase<br>FKBP4<br>OS=Homo<br>sapiens<br>GN=FKBP4<br>PE=1 SV=3 -<br>[FKBP4_HUMAN<br>]<br>Glucocorticoid<br>modulatory<br>element-<br>binding protein | 34.86 | 1 | 14 | 15 | 52 | 0.941 | 0.828 | 0.987 | 1.330 | 137.36 | 34.86 | 22 | 52 | 459 | 51.8  | 5.43 |
| Q9UKD1 | 2 OS=Homo<br>sapiens<br>GN=GMEB2<br>PE=1 SV=1 -<br>[GMEB2_HUMA<br>N]<br>Lysophosphatid<br>ylcholine<br>acyltransferase                                                                  | 1.32  | 1 | 1  | 1  | 3  | 1.042 | 1.032 | 1.108 | 1.330 | 6.05   | 1.32  | 2  | 3  | 530 | 56.4  | 5.60 |
| Q8NF37 | 1 OS=Homo<br>sapiens<br>GN=LPCAT1<br>PE=1 SV=2 -<br>[PCAT1_HUMAN<br>]<br>Mitogen-<br>activated<br>protein kinase<br>kinase kinase                                                       | 2.62  | 1 | 1  | 2  | 5  | 1.092 | 0.621 | 0.476 | 1.331 | 13.14  | 2.62  | 3  | 5  | 534 | 59.1  | 6.02 |
| Q99558 | 14 OS=Homo<br>sapiens<br>GN=MAP3K14<br>PE=1 SV=2 -<br>[M3K14_HUMA<br>N]<br>WD repeat-<br>containing<br>protein 91                                                                       | 0.95  | 1 | 1  | 1  | 1  | 1.065 | 1.050 | 0.766 | 1.331 | 2.33   | 0.95  | 1  | 1  | 947 | 104.0 | 7.72 |
| A4D1P6 | OS=Homo<br>sapiens<br>GN=WDR91<br>PE=1 SV=2 -<br>[WDR91_HUMA<br>N]<br>N6-adenosine-<br>methyltransfer<br>ase 70 kDa<br>subunit                                                          | 3.61  | 1 | 2  | 3  | 4  | 1.891 | 1.538 | 1.078 | 1.331 | 10.21  | 3.61  | 4  | 4  | 747 | 83.3  | 6.58 |
| Q86U44 | OS=Homo<br>sapiens<br>GN=METTL3<br>PE=1 SV=2 -<br>[MTA70_HUMA<br>N]<br>E3 ubiquitin-<br>protein ligase<br>BRE1A                                                                         | 6.03  | 1 | 3  | 3  | 5  | 1.599 | 1.567 | 1.267 | 1.331 | 9.88   | 6.03  | 4  | 5  | 580 | 64.4  | 6.42 |
| Q5VTR2 | OS=Homo<br>sapiens<br>GN=RNF20<br>PE=1 SV=2 -<br>[BRE1A_HUMAN<br>]<br>Splicing factor<br>1                                                                                              | 7.59  | 1 | 4  | 7  | 22 | 1.233 | 1.309 | 1.227 | 1.331 | 52.62  | 7.59  | 10 | 22 | 975 | 113.6 | 5.94 |
| Q15637 | OS=Homo<br>sapiens<br>GN=SF1 PE=1<br>SV=4 -<br>[SF01_HUMAN]                                                                                                                             | 22.38 | 1 | 11 | 12 | 73 | 1.117 | 1.261 | 1.240 | 1.332 | 186.45 | 22.38 | 18 | 73 | 639 | 68.3  | 8.98 |

|        |                                                                                                         |       |   |   |   |    |       |       |       |       |       |       |   |    |      |       |      |
|--------|---------------------------------------------------------------------------------------------------------|-------|---|---|---|----|-------|-------|-------|-------|-------|-------|---|----|------|-------|------|
| Q13769 | THO complex subunit 5 homolog<br>OS=Homo sapiens<br>GN=THOC5<br>PE=1 SV=2 - [THOC5_HUMAN]               | 7.03  | 1 | 5 | 5 | 15 | 1.012 | 1.191 | 0.772 | 1.332 | 30.21 | 7.03  | 8 | 15 | 683  | 78.5  | 6.87 |
| P41002 | Cyclin-F<br>OS=Homo sapiens<br>GN=CCNF<br>PE=1 SV=2 - [CCNF_HUMAN]                                      | 1.53  | 1 | 1 | 1 | 1  | 0.889 | 3.214 | 6.256 | 1.332 | 0.00  | 1.53  | 1 | 1  | 786  | 87.6  | 6.33 |
| Q9H9V4 | RING finger protein 122<br>OS=Homo sapiens<br>GN=RNF122<br>PE=2 SV=2 - [RNF122_HUMAN]                   | 12.26 | 1 | 1 | 1 | 2  | 1.808 | 3.655 | 1.284 | 1.332 | 0.00  | 12.26 | 1 | 2  | 155  | 17.5  | 7.88 |
| P56715 | Oxygen-regulated protein 1<br>OS=Homo sapiens<br>GN=RP1 PE=1 SV=1 - [RP1_HUMAN]                         | 1.86  | 1 | 3 | 3 | 3  | 1.138 | 0.838 | 1.013 | 1.332 | 4.46  | 1.86  | 3 | 3  | 2156 | 240.5 | 5.80 |
| Q6PJ69 | Tripartite motif-containing protein 65<br>OS=Homo sapiens<br>GN=TRIM65<br>PE=1 SV=3 - [TRIM65_HUMAN]    | 3.87  | 1 | 2 | 2 | 5  | 1.247 | 1.066 | 1.104 | 1.333 | 10.02 | 3.87  | 4 | 5  | 517  | 57.3  | 6.70 |
| O43818 | U3 small nucleolar RNA-interacting protein 2<br>OS=Homo sapiens<br>GN=RRP9<br>PE=1 SV=1 - [U3IP2_HUMAN] | 6.53  | 1 | 3 | 3 | 4  | 1.029 | 0.955 | 0.937 | 1.333 | 6.35  | 6.53  | 3 | 4  | 475  | 51.8  | 7.85 |
| Q9BSJ5 | Uncharacterized protein C17orf80<br>OS=Homo sapiens<br>GN=C17orf80<br>PE=2 SV=2 - [CQ080_HUMAN]         | 9.20  | 1 | 4 | 4 | 6  | 0.927 | 1.821 | 1.535 | 1.333 | 8.37  | 9.20  | 5 | 6  | 609  | 67.3  | 9.16 |
| Q9HCH0 | Nck-associated protein 5-like<br>OS=Homo sapiens<br>GN=NCKAP5L<br>PE=1 SV=2 - [NCK5L_HUMAN]             | 1.95  | 1 | 2 | 2 | 3  | 1.399 | 2.278 | 2.341 | 1.334 | 3.83  | 1.95  | 3 | 3  | 1330 | 138.9 | 8.13 |
| Q9HBP2 | Negative elongation factor A<br>OS=Homo sapiens<br>GN=NELFA<br>PE=1 SV=3 - [NELFA_HUMAN]                | 12.31 | 1 | 5 | 5 | 14 | 1.569 | 1.386 | 1.206 | 1.334 | 40.67 | 12.31 | 7 | 14 | 528  | 57.2  | 9.03 |

|        |                                                                                                                                                        |       |   |    |    |    |       |       |       |       |        |       |    |    |      |       |       |
|--------|--------------------------------------------------------------------------------------------------------------------------------------------------------|-------|---|----|----|----|-------|-------|-------|-------|--------|-------|----|----|------|-------|-------|
| Q13315 | Serine-protein kinase ATM<br>OS=Homo sapiens<br>GN=ATM PE=1 SV=4 - [ATM_HUMAN]                                                                         | 3.53  | 1 | 9  | 10 | 22 | 1.046 | 1.373 | 1.228 | 1.334 | 44.92  | 3.53  | 13 | 22 | 3056 | 350.5 | 6.81  |
| Q5T200 | Zinc finger CCH domain-containing protein 13<br>OS=Homo sapiens<br>GN=ZC3H13 PE=1 SV=1 - [ZC3HD_HUMAN]                                                 | 3.48  | 1 | 5  | 6  | 9  | 1.183 | 1.253 | 1.140 | 1.334 | 22.83  | 3.48  | 8  | 9  | 1668 | 196.5 | 9.42  |
| P81605 | Dermddin<br>OS=Homo sapiens<br>GN=DCD PE=1 SV=2 - [DCD_HUMAN]                                                                                          | 6.36  | 1 | 1  | 1  | 1  | 0.823 | 1.887 | 1.022 | 1.335 | 2.03   | 6.36  | 1  | 1  | 110  | 11.3  | 6.54  |
| Q86V25 | Vasohibin-2<br>OS=Homo sapiens<br>GN=VASH2 PE=1 SV=2 - [VASH2_HUMAN]                                                                                   | 2.82  | 1 | 1  | 1  | 1  | 2.603 | 0.544 | 1.043 | 1.335 | 1.71   | 2.82  | 1  | 1  | 355  | 40.4  | 10.01 |
| Q8NCN5 | Pyruvate dehydrogenase phosphatase regulatory subunit, mitochondrial<br>OS=Homo sapiens<br>GN=PDPR PE=1 SV=2 - [PDPR_HUMAN]                            | 13.08 | 1 | 10 | 10 | 15 | 1.146 | 1.175 | 0.997 | 1.336 | 31.71  | 13.08 | 12 | 15 | 879  | 99.3  | 6.35  |
| Q96I99 | Succinyl-CoA ligase [GDP-forming] subunit beta, mitochondrial<br>OS=Homo sapiens<br>GN=SUCLG2 PE=1 SV=2 - [SUCB2_HUMAN]                                | 46.30 | 1 | 20 | 20 | 84 | 1.123 | 1.041 | 0.928 | 1.336 | 193.61 | 46.30 | 38 | 84 | 432  | 46.5  | 6.39  |
| O60290 | Zinc finger protein 862<br>OS=Homo sapiens<br>GN=ZNF862 PE=2 SV=2 - [ZNF862_HUMAN]                                                                     | 0.51  | 1 | 1  | 1  | 1  | 1.036 | 1.158 | 0.862 | 1.336 | 0.00   | 0.51  | 1  | 1  | 1169 | 131.6 | 7.23  |
| Q9P2V4 | Leucine-rich repeat, immunoglobulin-like domain and transmembrane domain-containing protein 1<br>OS=Homo sapiens<br>GN=LRIT1 PE=2 SV=1 - [LRIT1_HUMAN] | 6.58  | 1 | 1  | 2  | 2  | 0.911 | 0.649 | 1.093 | 1.336 | 2.83   | 6.58  | 2  | 2  | 623  | 68.0  | 8.54  |

|        |                                                                                                             |       |   |    |    |    |       |       |       |       |       |       |    |     |      |       |      |
|--------|-------------------------------------------------------------------------------------------------------------|-------|---|----|----|----|-------|-------|-------|-------|-------|-------|----|-----|------|-------|------|
| B9ZVM9 | Putative t-complex protein 10A homolog 2<br>OS=Homo sapiens<br>GN=TCP10L2<br>PE=5 SV=2 - [TCP2L_HUMAN]      | 4.25  | 1 | 1  | 1  | 1  | 3.581 | 2.025 | 1.337 | 0.00  | 4.25  | 1     | 1  | 353 | 38.3 | 7.66  |      |
| P33121 | Long-chain-fatty-acid--CoA ligase 1<br>OS=Homo sapiens<br>GN=ACSL1<br>PE=1 SV=1 - [ACSL1_HUMAN]             | 28.37 | 2 | 17 | 19 | 46 | 0.906 | 0.979 | 0.807 | 1.337 | 94.40 | 28.37 | 29 | 46  | 698  | 77.9  | 7.15 |
| Q2M1Z3 | Rho GTPase-activating protein 31<br>OS=Homo sapiens<br>GN=ARHGAP31<br>PE=1 SV=2 - [RHG31_HUMAN]             | 3.12  | 1 | 3  | 3  | 4  | 0.697 | 1.127 | 1.100 | 1.337 | 7.52  | 3.12  | 4  | 4   | 1444 | 156.9 | 5.76 |
| P07199 | Major centromere autoantigen B<br>OS=Homo sapiens<br>GN=CENPB<br>PE=1 SV=2 - [CENPB_HUMAN]                  | 2.00  | 1 | 1  | 1  | 1  | 1.285 | 1.618 | 1.331 | 1.337 | 2.66  | 2.00  | 1  | 1   | 599  | 65.1  | 4.55 |
| Q6W0C5 | Developmental pluripotency-associated protein 3<br>OS=Homo sapiens<br>GN=DPPA3<br>PE=2 SV=1 - [DPPA3_HUMAN] | 4.40  | 1 | 1  | 1  | 1  | 1.055 | 0.662 | 0.690 | 1.338 | 1.88  | 4.40  | 1  | 1   | 159  | 17.8  | 8.63 |
| Q8ND30 | Liprin-beta-2<br>OS=Homo sapiens<br>GN=PPF1BP2<br>PE=1 SV=3 - [LIPB2_HUMAN]                                 | 5.25  | 1 | 2  | 4  | 8  | 1.434 | 0.953 | 0.931 | 1.338 | 19.85 | 5.25  | 5  | 8   | 876  | 98.5  | 6.27 |
| Q8TB40 | Abhydrolase domain-containing protein 4<br>OS=Homo sapiens<br>GN=ABHD4<br>PE=2 SV=1 - [ABHD4_HUMAN]         | 2.63  | 1 | 1  | 1  | 2  | 0.583 | 0.945 | 1.663 | 1.338 | 5.91  | 2.63  | 2  | 2   | 342  | 38.8  | 7.59 |
| Q9UBT7 | Alpha-catulin<br>OS=Homo sapiens<br>GN=CTNNA1<br>PE=1 SV=2 - [CTNLI_HUMAN]                                  | 4.22  | 1 | 3  | 3  | 4  | 1.108 | 1.214 | 1.153 | 1.338 | 6.78  | 4.22  | 4  | 4   | 734  | 81.8  | 6.64 |
| Q6PJT7 | Zinc finger CCCH domain-containing protein 14<br>OS=Homo sapiens<br>GN=ZC3H14<br>PE=1 SV=1 - [ZC3HE_HUMAN]  | 19.02 | 1 | 11 | 11 | 28 | 1.078 | 1.345 | 1.003 | 1.338 | 65.81 | 19.02 | 18 | 28  | 736  | 82.8  | 7.31 |

|        |                                                                                                                                     |       |   |    |    |     |       |       |       |       |        |       |    |     |     |      |       |
|--------|-------------------------------------------------------------------------------------------------------------------------------------|-------|---|----|----|-----|-------|-------|-------|-------|--------|-------|----|-----|-----|------|-------|
| Q13895 | <p>Bystin</p> <p>OS=Homo sapiens</p> <p>GN=BYSL PE=1 SV=3 - [BYST_HUMAN]</p>                                                        | 18.08 | 1 | 9  | 9  | 17  | 0.741 | 0.974 | 0.906 | 1.339 | 39.64  | 18.08 | 12 | 17  | 437 | 49.6 | 8.12  |
| P60468 | <p>Protein transport protein Sec61 subunit beta</p> <p>OS=Homo sapiens</p> <p>GN=SEC61B PE=1 SV=2 - [SEC61B_HUMAN]</p>              | 21.88 | 1 | 2  | 2  | 62  | 0.769 | 1.008 | 1.019 | 1.339 | 132.25 | 21.88 | 4  | 62  | 96  | 10.0 | 11.56 |
| P40425 | <p>Pre-B-cell leukemia transcription factor 2</p> <p>OS=Homo sapiens</p> <p>GN=PBX2 PE=1 SV=2 - [PBX2_HUMAN]</p>                    | 6.05  | 1 | 1  | 2  | 3   | 0.899 | 1.038 | 0.900 | 1.340 | 6.69   | 6.05  | 2  | 3   | 430 | 45.9 | 7.56  |
| O43660 | <p>Pleiotropic regulator 1</p> <p>OS=Homo sapiens</p> <p>GN=PLRG1 PE=1 SV=1 - [PLRG1_HUMAN]</p>                                     | 14.01 | 1 | 4  | 4  | 10  | 1.067 | 1.135 | 0.910 | 1.340 | 28.64  | 14.01 | 5  | 10  | 514 | 57.2 | 9.17  |
| Q15022 | <p>Polycomb protein SUZ12</p> <p>OS=Homo sapiens</p> <p>GN=SUZ12 PE=1 SV=3 - [SUZ12_HUMAN]</p>                                      | 1.35  | 1 | 1  | 1  | 3   | 0.921 | 1.252 | 0.992 | 1.340 | 4.76   | 1.35  | 2  | 3   | 739 | 83.0 | 8.81  |
| P52434 | <p>DNA-directed RNA polymerases I, II, and III subunit RPABC3</p> <p>OS=Homo sapiens</p> <p>GN=POLR2H PE=1 SV=4 - [RPAB3_HUMAN]</p> | 15.33 | 1 | 2  | 2  | 7   | 1.715 | 1.845 | 1.495 | 1.340 | 14.57  | 15.33 | 3  | 7   | 150 | 17.1 | 4.68  |
| Q9NS73 | <p>MAP3K12-binding inhibitory protein 1</p> <p>OS=Homo sapiens</p> <p>GN=MBIP PE=1 SV=2 - [MBIP1_HUMAN]</p>                         | 4.36  | 1 | 1  | 2  | 4   | 1.086 | 1.351 | 1.273 | 1.341 | 5.55   | 4.36  | 3  | 4   | 344 | 39.3 | 7.24  |
| P52209 | <p>6-phosphogluconate decarboxylating</p> <p>OS=Homo sapiens</p> <p>GN=PGD PE=1 SV=3 - [6PGD_HUMAN]</p>                             | 55.69 | 1 | 29 | 31 | 372 | 1.546 | 0.546 | 0.862 | 1.341 | 946.62 | 55.69 | 50 | 372 | 483 | 53.1 | 7.23  |

|        |                                                                                                             |       |   |    |    |     |       |       |       |       |        |       |    |     |      |       |      |
|--------|-------------------------------------------------------------------------------------------------------------|-------|---|----|----|-----|-------|-------|-------|-------|--------|-------|----|-----|------|-------|------|
| Q00403 | Transcription initiation factor IIB OS=Homo sapiens<br>GN=GTF2B<br>PE=1 SV=1 - [TF2B_HUMAN]                 | 22.47 | 1 | 5  | 6  | 13  | 1.203 | 1.398 | 1.109 | 1.341 | 32.34  | 22.47 | 9  | 13  | 316  | 34.8  | 8.35 |
| Q03701 | CCAAT/enhancer-binding protein zeta OS=Homo sapiens<br>GN=CEBPZ<br>PE=1 SV=3 - [CEBPZ_HUMAN]                | 6.36  | 1 | 6  | 6  | 14  | 0.802 | 0.923 | 0.848 | 1.341 | 29.85  | 6.36  | 10 | 14  | 1054 | 120.9 | 5.94 |
| Q725L9 | Interferon regulatory factor 2-binding protein 2 OS=Homo sapiens<br>GN=IRF2BP2<br>PE=1 SV=2 - [I2BP2_HUMAN] | 17.38 | 1 | 7  | 8  | 23  | 1.122 | 1.493 | 0.860 | 1.341 | 41.78  | 17.38 | 10 | 23  | 587  | 61.0  | 8.69 |
| P27487 | Dipeptidyl peptidase 4 OS=Homo sapiens<br>GN=DPP4<br>PE=1 SV=2 - [DPP4_HUMAN]                               | 38.12 | 1 | 30 | 30 | 132 | 2.968 | 0.563 | 0.697 | 1.341 | 310.10 | 38.12 | 46 | 132 | 766  | 88.2  | 6.04 |
| P36508 | Zinc finger protein 76 OS=Homo sapiens<br>GN=ZNF76<br>PE=2 SV=2 - [ZNF76_HUMAN]                             | 1.58  | 2 | 1  | 1  | 4   | 1.014 | 1.129 | 1.147 | 1.341 | 5.32   | 1.58  | 2  | 4   | 570  | 61.8  | 6.05 |
| Q70EK8 | Inactive ubiquitin carboxyl-terminal hydrolase 53 OS=Homo sapiens<br>GN=USP53<br>PE=2 SV=2 - [UBP53_HUMAN]  | 1.30  | 1 | 1  | 1  | 1   | 1.519 | 1.062 | 1.268 | 1.342 | 2.25   | 1.30  | 1  | 1   | 1073 | 120.7 | 7.59 |
| Q9BRS2 | Serine/threonine-protein kinase RIO1 OS=Homo sapiens<br>GN=RIOK1<br>PE=1 SV=2 - [RIOK1_HUMAN]               | 3.87  | 1 | 2  | 2  | 5   | 0.825 | 0.864 | 0.911 | 1.342 | 10.87  | 3.87  | 3  | 5   | 568  | 65.5  | 6.19 |
| P62306 | Small nuclear ribonucleoprotein F OS=Homo sapiens<br>GN=SNRPF<br>PE=1 SV=1 - [RUXF_HUMAN]                   | 9.30  | 1 | 1  | 1  | 1   | 1.054 | 0.915 | 1.116 | 1.342 | 2.18   | 9.30  | 1  | 1   | 86   | 9.7   | 4.67 |

|        |                                                                                                                          |       |   |    |    |    |       |       |       |       |       |       |    |    |      |       |      |
|--------|--------------------------------------------------------------------------------------------------------------------------|-------|---|----|----|----|-------|-------|-------|-------|-------|-------|----|----|------|-------|------|
| P36551 | Oxygen-dependent coproporphyrinogen-III oxidase, mitochondrial<br>OS=Homo sapiens<br>GN=CPOX<br>PE=1 SV=3 - [HEM6_HUMAN] | 25.11 | 1 | 10 | 10 | 24 | 1.041 | 1.328 | 1.173 | 1.343 | 64.76 | 25.11 | 17 | 24 | 454  | 50.1  | 8.25 |
| O94868 | FCH and double SH3 domains protein 2<br>OS=Homo sapiens<br>GN=FCHSD2<br>PE=1 SV=3 - [FCSD2_HUMAN]                        | 2.84  | 1 | 2  | 3  | 8  | 0.863 | 0.964 | 1.429 | 1.343 | 11.83 | 2.84  | 4  | 8  | 740  | 84.2  | 5.77 |
| Q8TBM8 | DnaJ homolog subfamily B member 14<br>OS=Homo sapiens<br>GN=DNAJB14<br>PE=1 SV=1 - [DJB14_HUMAN]                         | 3.69  | 1 | 2  | 2  | 3  | 1.005 | 0.877 | 1.026 | 1.344 | 4.34  | 3.69  | 3  | 3  | 379  | 42.5  | 8.59 |
| O15160 | DNA-directed RNA polymerases I and III subunit RPAC1<br>OS=Homo sapiens<br>GN=POLR1C<br>PE=1 SV=1 - [RPAC1_HUMAN]        | 26.59 | 1 | 7  | 7  | 21 | 0.906 | 0.914 | 1.038 | 1.344 | 49.46 | 26.59 | 10 | 21 | 346  | 39.2  | 5.50 |
| Q96P20 | NACHT, LRR and PYD domains-containing protein 3<br>OS=Homo sapiens<br>GN=NLRP3<br>PE=1 SV=3 - [NALP3_HUMAN]              | 1.06  | 1 | 1  | 1  | 1  | 2.958 | 0.897 | 1.124 | 1.344 | 0.00  | 1.06  | 1  | 1  | 1036 | 118.1 | 6.65 |
| Q9UBI9 | Headcase protein homolog<br>OS=Homo sapiens<br>GN=HECA<br>PE=1 SV=1 - [HDC_HUMAN]                                        | 1.84  | 1 | 1  | 1  | 1  | 0.638 | 1.882 | 1.365 | 1.344 | 0.00  | 1.84  | 1  | 1  | 543  | 58.8  | 8.54 |
| Q86WV6 | Stimulator of interferon genes protein<br>OS=Homo sapiens<br>GN=TMEM173<br>PE=1 SV=1 - [STING_HUMAN]                     | 28.23 | 1 | 7  | 7  | 20 | 1.743 | 1.466 | 1.158 | 1.345 | 46.12 | 28.23 | 11 | 20 | 379  | 42.2  | 7.05 |
| O14718 | Visual pigment-like receptor peropsin<br>OS=Homo sapiens<br>GN=RRH PE=1 SV=1 - [OPSX_HUMAN]                              | 2.97  | 1 | 1  | 1  | 1  | 1.160 |       |       | 1.345 | 2.90  | 2.97  | 1  | 1  | 337  | 37.4  | 8.48 |



|        |                                                                                                                             |       |   |    |    |    |       |       |       |       |        |       |    |    |      |       |      |
|--------|-----------------------------------------------------------------------------------------------------------------------------|-------|---|----|----|----|-------|-------|-------|-------|--------|-------|----|----|------|-------|------|
| Q49MG5 | Microtubule-associated protein 9<br>OS=Homo sapiens<br>GN=MAP9<br>PE=1 SV=3 - [MAP9_HUMAN]                                  | 1.39  | 1 | 1  | 1  | 2  | 1.070 | 1.370 | 1.365 | 1.345 | 3.02   | 1.39  | 2  | 2  | 647  | 74.2  | 7.80 |
| Q9C098 | Serine/threonine-protein kinase DCLK3<br>OS=Homo sapiens<br>GN=DCLK3<br>PE=1 SV=2 - [DCLK3_HUMAN]                           | 4.01  | 1 | 2  | 3  | 4  | 1.270 | 1.118 | 1.219 | 1.346 | 9.68   | 4.01  | 3  | 4  | 648  | 73.8  | 8.84 |
| Q96AQ6 | Pre-B-cell leukemia transcription factor-interacting protein 1<br>OS=Homo sapiens<br>GN=PBXIP1<br>PE=1 SV=1 - [PBIP1_HUMAN] | 31.33 | 1 | 21 | 21 | 74 | 1.412 | 1.355 | 1.501 | 1.346 | 166.75 | 31.33 | 35 | 74 | 731  | 80.6  | 5.33 |
| Q96M86 | Dynein heavy chain domain-containing protein 1<br>OS=Homo sapiens<br>GN=DNHD1<br>PE=2 SV=2 - [DNHD1_HUMAN]                  | 1.05  | 1 | 4  | 5  | 8  | 1.052 | 0.867 | 1.146 | 1.346 | 13.06  | 1.05  | 6  | 8  | 4753 | 533.3 | 6.71 |
| P56182 | Ribosomal RNA processing protein 1 homolog A<br>OS=Homo sapiens<br>GN=RRP1<br>PE=1 SV=1 - [RRP1_HUMAN]                      | 2.60  | 1 | 1  | 1  | 5  | 0.808 | 1.116 | 1.061 | 1.347 | 11.35  | 2.60  | 2  | 5  | 461  | 52.8  | 9.33 |
| Q9UI30 | Multifunctional methyltransferase subunit TRM112-like protein<br>OS=Homo sapiens<br>GN=TRMT112<br>PE=1 SV=1 - [TR112_HUMAN] | 39.20 | 1 | 4  | 4  | 7  | 0.683 | 0.961 | 1.156 | 1.347 | 20.22  | 39.20 | 6  | 7  | 125  | 14.2  | 5.26 |
| Q99567 | Nuclear pore complex protein Nup88<br>OS=Homo sapiens<br>GN=NUP88<br>PE=1 SV=2 - [NUP88_HUMAN]                              | 12.55 | 1 | 8  | 8  | 19 | 1.110 | 1.133 | 1.011 | 1.347 | 47.98  | 12.55 | 11 | 19 | 741  | 83.5  | 5.69 |
| Q9Y6G3 | 39S ribosomal protein L42, mitochondrial<br>OS=Homo sapiens<br>GN=MRPL42<br>PE=1 SV=1 - [RM42_HUMAN]                        | 21.13 | 1 | 3  | 3  | 9  | 1.096 | 1.229 | 1.631 | 1.348 | 22.78  | 21.13 | 4  | 9  | 142  | 16.7  | 8.35 |

|        |                                                                                                                |       |   |    |    |     |       |       |       |       |        |       |    |     |      |       |       |
|--------|----------------------------------------------------------------------------------------------------------------|-------|---|----|----|-----|-------|-------|-------|-------|--------|-------|----|-----|------|-------|-------|
| O00625 | Pirin OS=Homo sapiens<br>GN=PIR PE=1 SV=1 - [PIR_HUMAN]                                                        | 16.55 | 1 | 4  | 4  | 6   | 1.375 | 0.512 | 0.727 | 1.348 | 11.70  | 16.55 | 4  | 6   | 290  | 32.1  | 6.92  |
| Q96N95 | Zinc finger protein 396 OS=Homo sapiens<br>GN=ZNF396 PE=1 SV=2 - [ZNF396_HUMAN]                                | 2.39  | 1 | 1  | 1  | 1   | 0.700 | 0.670 | 0.820 | 1.348 | 2.43   | 2.39  | 1  | 1   | 335  | 38.6  | 8.05  |
| Q63HQ2 | Pilachurin OS=Homo sapiens<br>GN=EGFLAM PE=1 SV=2 - [EGFLA_HUMAN]                                              | 1.38  | 1 | 1  | 1  | 2   | 1.985 | 0.548 | 1.098 | 1.348 | 0.00   | 1.38  | 1  | 2   | 1017 | 111.2 | 7.40  |
| P29558 | RNA-binding motif, single-stranded-interacting protein 1 OS=Homo sapiens<br>GN=RBMS1 PE=1 SV=3 - [RBMS1_HUMAN] | 17.24 | 1 | 3  | 7  | 23  | 1.259 | 0.836 | 1.017 | 1.348 | 61.07  | 17.24 | 11 | 23  | 406  | 44.5  | 8.79  |
| Q6P1L8 | 39S ribosomal protein L14, mitochondrial OS=Homo sapiens<br>GN=MRPL14 PE=1 SV=1 - [RM14_HUMAN]                 | 22.76 | 1 | 2  | 2  | 6   | 1.179 | 1.011 | 1.079 | 1.348 | 18.26  | 22.76 | 3  | 6   | 145  | 15.9  | 10.24 |
| Q7Z333 | Probable helicase senataxin OS=Homo sapiens<br>GN=SETX PE=1 SV=4 - [SETX_HUMAN]                                | 1.87  | 2 | 3  | 5  | 10  | 0.772 | 1.034 | 0.891 | 1.349 | 8.44   | 1.87  | 5  | 10  | 2677 | 302.7 | 7.17  |
| P23246 | Splicing factor, proline- and glutamine-rich OS=Homo sapiens<br>GN=SFPQ PE=1 SV=2 - [SFPQ_HUMAN]               | 38.76 | 1 | 26 | 27 | 192 | 1.100 | 1.303 | 1.042 | 1.349 | 446.41 | 38.76 | 44 | 192 | 707  | 76.1  | 9.44  |
| Q8WU14 | Histone deacetylase 7 OS=Homo sapiens<br>GN=HDAC7 PE=1 SV=2 - [HDAC7_HUMAN]                                    | 4.10  | 1 | 4  | 4  | 25  | 0.744 | 0.956 | 1.020 | 1.349 | 47.82  | 4.10  | 7  | 25  | 952  | 102.9 | 7.58  |
| O95926 | Pre-mRNA-splicing factor SYF2 OS=Homo sapiens<br>GN=SYF2 PE=1 SV=1 - [SYF2_HUMAN]                              | 15.23 | 1 | 3  | 3  | 5   | 1.056 | 1.108 | 0.953 | 1.350 | 2.48   | 15.23 | 4  | 5   | 243  | 28.7  | 8.40  |

|        |                                                                                                                                   |       |   |    |    |    |       |       |       |       |        |       |    |    |      |       |       |
|--------|-----------------------------------------------------------------------------------------------------------------------------------|-------|---|----|----|----|-------|-------|-------|-------|--------|-------|----|----|------|-------|-------|
| Q9HAV4 | Exportin-5<br>OS=Homo sapiens<br>GN=XPO5<br>PE=1 SV=1 - [XPO5_HUMAN]                                                              | 4.15  | 1 | 5  | 5  | 12 | 1.015 | 0.856 | 0.873 | 1.350 | 25.22  | 4.15  | 8  | 12 | 1204 | 136.2 | 5.80  |
| Q5K4L6 | Long-chain fatty acid transport protein 3<br>OS=Homo sapiens<br>GN=SLC27A3<br>PE=2 SV=3 - [S27A3_HUMAN]                           | 6.03  | 1 | 3  | 3  | 5  | 1.389 | 1.332 | 0.815 | 1.350 | 18.08  | 6.03  | 4  | 5  | 730  | 78.6  | 7.49  |
| Q9NTZ6 | RNA-binding protein 12<br>OS=Homo sapiens<br>GN=RBM12<br>PE=1 SV=1 - [RBM12_HUMAN]                                                | 11.59 | 1 | 9  | 9  | 33 | 1.203 | 1.232 | 1.013 | 1.350 | 76.91  | 11.59 | 16 | 33 | 932  | 97.3  | 8.63  |
| Q6R3Z7 | Rapamycin-insensitive companion of mTOR<br>OS=Homo sapiens<br>GN=RICTOR<br>PE=1 SV=1 - [RICTR_HUMAN]                              | 2.11  | 1 | 3  | 3  | 3  | 1.009 | 0.968 | 0.781 | 1.350 | 7.52   | 2.11  | 3  | 3  | 1708 | 192.1 | 7.47  |
| Q92754 | Transcription factor AP-2 gamma<br>OS=Homo sapiens<br>GN=TFAP2C<br>PE=1 SV=1 - [AP2C_HUMAN]                                       | 2.89  | 1 | 1  | 2  | 8  | 3.748 | 1.423 | 1.144 | 1.350 | 18.08  | 2.89  | 2  | 8  | 450  | 49.1  | 7.83  |
| P00390 | Glutathione reductase, mitochondrial<br>OS=Homo sapiens<br>GN=GSR PE=1 SV=2 - [GSHR_HUMAN]                                        | 32.76 | 1 | 11 | 12 | 56 | 1.721 | 0.659 | 0.826 | 1.350 | 139.57 | 32.76 | 19 | 56 | 522  | 56.2  | 8.50  |
| O43181 | NADH dehydrogenase [ubiquinone] iron-sulfur protein 4, mitochondrial<br>OS=Homo sapiens<br>GN=NDUFS4<br>PE=1 SV=1 - [NDUS4_HUMAN] | 32.00 | 1 | 5  | 5  | 30 | 0.671 | 1.038 | 0.817 | 1.351 | 86.28  | 32.00 | 8  | 30 | 175  | 20.1  | 10.30 |
| O43303 | Centriolar coiled-coil protein of 110 kDa<br>OS=Homo sapiens<br>GN=CCP110<br>PE=1 SV=3 - [CP110_HUMAN]                            | 5.04  | 1 | 3  | 4  | 8  | 1.064 | 1.262 | 1.007 | 1.351 | 18.43  | 5.04  | 6  | 8  | 1012 | 113.4 | 8.65  |

|        |                                                                                                                                                |       |   |    |    |    |       |       |       |       |        |       |    |    |      |       |       |
|--------|------------------------------------------------------------------------------------------------------------------------------------------------|-------|---|----|----|----|-------|-------|-------|-------|--------|-------|----|----|------|-------|-------|
| Q5T3U5 | Multidrug<br>resistance-<br>associated<br>protein 7<br>OS=Homo<br>sapiens<br>GN=ABCC10<br>PE=1 SV=1 -<br>[MRP7_HUMAN]                          | 0.47  | 1 | 1  | 1  | 2  | 0.938 | 1.020 | 0.932 | 1.351 | 3.68   | 0.47  | 1  | 2  | 1492 | 161.5 | 7.08  |
| A2RUS2 | DENN domain-<br>containing<br>protein 3<br>OS=Homo<br>sapiens<br>GN=DEND3<br>PE=1 SV=2 -<br>[DEND3_HUMAN<br>]                                  | 3.67  | 1 | 5  | 5  | 13 | 1.484 | 0.931 | 1.736 | 1.352 | 26.46  | 3.67  | 7  | 13 | 1198 | 135.8 | 7.06  |
| P04920 | Anion<br>exchange<br>protein 2<br>OS=Homo<br>sapiens<br>GN=SLC4A2<br>PE=1 SV=4 -<br>[B3A2_HUMAN]                                               | 0.73  | 1 | 1  | 1  | 3  | 2.355 | 0.822 | 1.313 | 1.352 | 0.00   | 0.73  | 2  | 3  | 1241 | 136.9 | 6.29  |
| Q6V9R5 | Zinc finger<br>protein 562<br>OS=Homo<br>sapiens<br>GN=ZNF562<br>PE=2 SV=2 -<br>[ZNF562_HUMAN<br>]                                             | 2.11  | 2 | 1  | 1  | 1  | 1.617 | 0.749 | 0.821 | 1.352 | 1.84   | 2.11  | 1  | 1  | 426  | 48.5  | 8.41  |
| Q9NRK6 | ATP-binding<br>cassette sub-<br>family B<br>member 10,<br>mitochondrial<br>OS=Homo<br>sapiens<br>GN=ABCB10<br>PE=1 SV=2 -<br>[ABCBA_HUMAN<br>] | 2.17  | 1 | 2  | 2  | 2  | 0.978 | 2.050 | 1.333 | 1.353 | 4.49   | 2.17  | 2  | 2  | 738  | 79.1  | 9.85  |
| Q16629 | Serine/arginine-<br>rich splicing<br>factor 7<br>OS=Homo<br>sapiens<br>GN=SRSF7<br>PE=1 SV=1 -<br>[SRSF7_HUMAN<br>]                            | 19.75 | 1 | 4  | 5  | 45 | 1.275 | 1.229 | 1.012 | 1.353 | 103.14 | 19.75 | 10 | 45 | 238  | 27.4  | 11.82 |
| P11387 | DNA<br>topoisomerase<br>1 OS=Homo<br>sapiens<br>GN=TOP1<br>PE=1 SV=2 -<br>[TOP1_HUMAN]                                                         | 34.51 | 1 | 23 | 26 | 67 | 0.993 | 1.123 | 0.817 | 1.353 | 133.67 | 34.51 | 39 | 67 | 765  | 90.7  | 9.31  |
| Q9HBU6 | Ethanolamine<br>kinase 1<br>OS=Homo<br>sapiens<br>GN=ETNK1<br>PE=1 SV=1 -<br>[EK11_HUMAN]                                                      | 2.65  | 1 | 1  | 1  | 4  | 0.675 | 0.887 | 1.153 | 1.353 | 13.97  | 2.65  | 2  | 4  | 452  | 50.9  | 6.54  |
| Q9UHL4 | Dipeptidyl<br>peptidase 2<br>OS=Homo<br>sapiens<br>GN=DPP7<br>PE=1 SV=3 -<br>[DPP2_HUMAN]                                                      | 26.02 | 1 | 11 | 11 | 54 | 1.109 | 1.056 | 0.879 | 1.353 | 144.70 | 26.02 | 19 | 54 | 492  | 54.3  | 6.32  |

|        |                                                                                                                             |       |   |    |    |     |       |       |       |       |        |       |    |     |     |      |      |
|--------|-----------------------------------------------------------------------------------------------------------------------------|-------|---|----|----|-----|-------|-------|-------|-------|--------|-------|----|-----|-----|------|------|
| Q9NZN3 | EH domain-containing protein 3<br>OS=Homo sapiens<br>GN=EHD3<br>PE=1 SV=2 - [EHD3_HUMAN]                                    | 26.17 | 2 | 6  | 20 | 117 | 0.989 | 1.068 | 1.208 | 1.353 | 251.25 | 26.17 | 30 | 117 | 535 | 60.8 | 6.57 |
| Q8M4T4 | Rho guanine nucleotide exchange factor 39<br>OS=Homo sapiens<br>GN=ARGGEF39<br>PE=2 SV=1 - [ARG39_HUMAN]                    | 8.96  | 1 | 1  | 1  | 1   | 0.936 | 0.593 |       | 1.354 | 2.82   | 8.96  | 1  | 1   | 335 | 38.3 | 9.64 |
| Q9BTL4 | Immediate early response gene 2 protein<br>OS=Homo sapiens<br>GN=IER2 PE=1 SV=1 - [IER2_HUMAN]                              | 7.62  | 1 | 1  | 1  | 1   | 4.977 | 2.795 | 1.572 | 1.354 | 2.32   | 7.62  | 1  | 1   | 223 | 24.2 | 6.92 |
| Q9BUR5 | Apolipoprotein O<br>OS=Homo sapiens<br>GN=APOO PE=1 SV=1 - [APOO_HUMAN]                                                     | 18.18 | 1 | 3  | 3  | 6   | 1.048 | 1.088 | 0.779 | 1.354 | 13.90  | 18.18 | 5  | 6   | 198 | 22.3 | 9.13 |
| O96013 | Serine/threonine-protein kinase PAK 4<br>OS=Homo sapiens<br>GN=PAK4<br>PE=1 SV=1 - [PAK4_HUMAN]                             | 3.89  | 2 | 2  | 3  | 3   | 1.278 | 1.793 | 0.999 | 1.355 | 7.30   | 3.89  | 3  | 3   | 591 | 64.0 | 9.73 |
| Q9Y282 | Endoplasmic reticulum-Golgi intermediate compartment protein 3<br>OS=Homo sapiens<br>GN=ERGIC3<br>PE=1 SV=1 - [ERGL3_HUMAN] | 19.58 | 1 | 7  | 8  | 26  | 0.952 | 0.848 | 0.884 | 1.355 | 74.69  | 19.58 | 10 | 26  | 383 | 43.2 | 6.06 |
| A6NGH7 | Coiled-coil domain-containing protein 160<br>OS=Homo sapiens<br>GN=CCDC160<br>PE=3 SV=3 - [CC160_HUMAN]                     | 4.62  | 2 | 1  | 2  | 3   | 0.824 | 1.395 | 0.844 | 1.356 | 7.44   | 4.62  | 2  | 3   | 325 | 38.3 | 5.41 |
| Q14644 | Ras GTPase-activating protein 3<br>OS=Homo sapiens<br>GN=RASA3<br>PE=1 SV=3 - [RASA3_HUMAN]                                 | 15.47 | 1 | 13 | 14 | 26  | 1.511 | 0.779 | 0.927 | 1.356 | 54.91  | 15.47 | 20 | 26  | 834 | 95.6 | 7.15 |

|        |                                                                                                       |       |   |   |   |    |       |       |       |       |       |       |    |    |     |       |       |
|--------|-------------------------------------------------------------------------------------------------------|-------|---|---|---|----|-------|-------|-------|-------|-------|-------|----|----|-----|-------|-------|
| Q9Y4W2 | Ribosomal biogenesis protein IAS1L<br>OS=Homo sapiens<br>GN=IAS1L<br>PE=1 SV=2 - [IAS1L_HUMAN]        | 5.18  | 1 | 3 | 3 | 7  | 0.654 | 1.292 | 0.936 | 1.356 | 24.89 | 5.18  | 5  | 7  | 734 | 83.0  | 4.73  |
| Q2M3G4 | Protein Shroom1<br>OS=Homo sapiens<br>GN=SHROOM1<br>PE=1 SV=1 - [SHRM1_HUMAN]                         | 0.94  | 1 | 1 | 1 | 1  | 0.900 | 0.586 | 0.780 | 1.357 | 2.19  | 0.94  | 1  | 1  | 852 | 90.7  | 6.15  |
| Q96MU7 | YTH domain-containing protein 1<br>OS=Homo sapiens<br>GN=YTHDC1<br>PE=1 SV=3 - [YTDC1_HUMAN]          | 7.84  | 1 | 6 | 6 | 18 | 1.268 | 1.620 | 1.131 | 1.357 | 29.32 | 7.84  | 10 | 18 | 727 | 84.6  | 6.23  |
| P14927 | Cytochrome b-c1 complex subunit 7<br>OS=Homo sapiens<br>GN=UQCRB<br>PE=1 SV=2 - [QCR7_HUMAN]          | 66.67 | 1 | 8 | 8 | 23 | 1.072 | 1.303 | 0.817 | 1.357 | 52.58 | 66.67 | 13 | 23 | 111 | 13.5  | 8.78  |
| Q8N5G0 | Small integral membrane protein 20<br>OS=Homo sapiens<br>GN=SMIM20<br>PE=1 SV=2 - [SMI20_HUMAN]       | 13.10 | 1 | 2 | 2 | 17 | 1.141 | 1.148 | 0.930 | 1.357 | 36.16 | 13.10 | 3  | 17 | 168 | 18.4  | 10.99 |
| P37108 | Signal recognition partide 14 kDa protein<br>OS=Homo sapiens<br>GN=SRP14<br>PE=1 SV=2 - [SRP14_HUMAN] | 44.12 | 1 | 7 | 7 | 28 | 1.092 | 1.354 | 0.982 | 1.357 | 59.62 | 44.12 | 12 | 28 | 136 | 14.6  | 10.04 |
| Q9P0V3 | SH3 domain-binding protein 4<br>OS=Homo sapiens<br>GN=SH3BP4<br>PE=1 SV=1 - [SH3B4_HUMAN]             | 9.24  | 1 | 8 | 8 | 17 | 1.245 | 0.762 | 0.976 | 1.357 | 38.28 | 9.24  | 13 | 17 | 963 | 107.4 | 7.71  |
| O14807 | Ras-related protein M-Ras<br>OS=Homo sapiens<br>GN=MRAS<br>PE=1 SV=2 - [RASM_HUMAN]                   | 3.37  | 1 | 1 | 1 | 2  | 1.325 | 0.363 | 0.321 | 1.358 | 5.28  | 3.37  | 2  | 2  | 208 | 23.8  | 8.79  |
| Q02318 | Sterol 26-hydroxylase, mitochondrial<br>OS=Homo sapiens<br>GN=CYP27A1<br>PE=1 SV=1 - [CP27A_HUMAN]    | 9.79  | 1 | 5 | 5 | 9  | 1.200 | 0.985 | 0.920 | 1.358 | 14.07 | 9.79  | 8  | 9  | 531 | 60.2  | 8.90  |

|        |                                                                                                            |       |   |    |    |     |       |       |       |       |        |       |    |     |      |       |      |
|--------|------------------------------------------------------------------------------------------------------------|-------|---|----|----|-----|-------|-------|-------|-------|--------|-------|----|-----|------|-------|------|
| Q13825 | Methylglutaconyl-CoA hydratase, mitochondrial<br>OS=Homo sapiens<br>GN=AUH PE=1<br>SV=1 - [AUHM_HUMAN]     | 15.93 | 1 | 4  | 5  | 8   | 1.219 | 1.641 | 0.921 | 1.358 | 20.58  | 15.93 | 6  | 8   | 339  | 35.6  | 9.48 |
| Q6LXH1 | Cysteine-rich with EGF-like domain protein 2<br>OS=Homo sapiens<br>GN=CRELD2 PE=1 SV=1 - [CREL2_HUMAN]     | 8.50  | 1 | 3  | 3  | 8   | 0.596 | 0.986 | 0.805 | 1.358 | 24.41  | 8.50  | 6  | 8   | 353  | 38.2  | 4.59 |
| Q14444 | Caprin-1<br>OS=Homo sapiens<br>GN=CAPRIN1 PE=1 SV=2 - [CAPR1_HUMAN]                                        | 21.72 | 1 | 16 | 16 | 111 | 0.993 | 1.191 | 1.168 | 1.359 | 237.03 | 21.72 | 26 | 111 | 709  | 78.3  | 5.25 |
| Q5BKZ1 | DBIRD complex subunit ZNF326<br>OS=Homo sapiens<br>GN=ZNF326 PE=1 SV=2 - [ZNF326_HUMAN]                    | 15.12 | 1 | 8  | 8  | 25  | 1.422 | 1.125 | 1.012 | 1.360 | 52.87  | 15.12 | 12 | 25  | 582  | 65.6  | 5.15 |
| P55789 | FAD-linked sulphhydryl oxidase ALR<br>OS=Homo sapiens<br>GN=GFER PE=1 SV=2 - [ALR_HUMAN]                   | 12.68 | 1 | 2  | 2  | 3   | 0.683 | 1.025 | 0.871 | 1.360 | 12.21  | 12.68 | 2  | 3   | 205  | 23.4  | 7.62 |
| Q86VF7 | Nebulin-related-anchoring protein<br>OS=Homo sapiens<br>GN=NRAP PE=2 SV=2 - [NRAP_HUMAN]                   | 1.45  | 1 | 2  | 2  | 2   | 1.051 | 0.937 | 1.342 | 1.360 | 2.77   | 1.45  | 2  | 2   | 1730 | 197.0 | 9.20 |
| O00221 | NF-kappa-B inhibitor epsilon<br>OS=Homo sapiens<br>GN=NFKBIE PE=1 SV=3 - [IKBE_HUMAN]                      | 2.40  | 1 | 1  | 1  | 2   | 1.518 | 1.305 | 1.696 | 1.360 | 6.93   | 2.40  | 2  | 2   | 500  | 52.8  | 6.68 |
| Q03989 | AT-rich interactive domain-containing protein 5A<br>OS=Homo sapiens<br>GN=ARID5A PE=1 SV=2 - [ARI5A_HUMAN] | 2.53  | 1 | 1  | 1  | 1   | 4.731 | 1.992 | 1.183 | 1.360 | 0.00   | 2.53  | 1  | 1   | 594  | 64.0  | 9.25 |
| O94988 | Protein FAM13A<br>OS=Homo sapiens<br>GN=FAM13A PE=1 SV=2 - [FA13A_HUMAN]                                   | 1.47  | 1 | 1  | 2  | 6   | 0.951 | 1.029 | 0.800 | 1.361 | 12.24  | 1.47  | 2  | 6   | 1023 | 116.9 | 6.48 |

|        |                                                                                                                     |       |   |    |    |     |       |       |       |       |        |       |    |     |      |       |      |
|--------|---------------------------------------------------------------------------------------------------------------------|-------|---|----|----|-----|-------|-------|-------|-------|--------|-------|----|-----|------|-------|------|
| Q96B97 | SH3 domain-containing kinase-binding protein 1<br>OS=Homo sapiens<br>GN=SH3KBP1<br>PE=1 SV=2 - [SH3K1_HUMAN]        | 19.25 | 1 | 12 | 12 | 37  | 1.049 | 0.435 | 0.594 | 1.362 | 82.28  | 19.25 | 20 | 37  | 665  | 73.1  | 6.62 |
| Q9BRF8 | Serine/threonine-protein phosphatase CPPED1<br>OS=Homo sapiens<br>GN=CPPED1<br>PE=1 SV=3 - [CPPED_HUMAN]            | 35.99 | 1 | 9  | 9  | 43  | 2.146 | 0.667 | 1.125 | 1.362 | 100.69 | 35.99 | 17 | 43  | 314  | 35.5  | 6.20 |
| O95400 | CD2 antigen cytoplasmic tail-binding protein 2<br>OS=Homo sapiens<br>GN=CD2BP2<br>PE=1 SV=1 - [CD2B2_HUMAN]         | 16.72 | 1 | 6  | 6  | 11  | 1.330 | 1.294 | 1.189 | 1.362 | 21.16  | 16.72 | 9  | 11  | 341  | 37.6  | 4.61 |
| Q9Y5Q9 | General transcription factor 3C polypeptide 3<br>OS=Homo sapiens<br>GN=GTF3C3<br>PE=1 SV=1 - [TF3C3_HUMAN]          | 3.05  | 1 | 2  | 2  | 6   | 1.088 | 1.125 | 0.961 | 1.362 | 8.52   | 3.05  | 3  | 6   | 886  | 101.2 | 5.07 |
| Q14966 | Zinc finger protein 638<br>OS=Homo sapiens<br>GN=ZNF638<br>PE=1 SV=2 - [ZNF38_HUMAN]                                | 3.39  | 1 | 6  | 6  | 16  | 1.148 | 1.364 | 0.960 | 1.363 | 25.08  | 3.39  | 9  | 16  | 1978 | 220.5 | 6.38 |
| Q13283 | Ras GTPase-activating protein-binding protein 1<br>OS=Homo sapiens<br>GN=G3BP1<br>PE=1 SV=1 - [G3BP1_HUMAN]         | 40.77 | 1 | 14 | 16 | 117 | 0.943 | 0.876 | 0.915 | 1.363 | 296.82 | 40.77 | 26 | 117 | 466  | 52.1  | 5.52 |
| Q5VWQ8 | Disabled homolog 2-interacting protein<br>OS=Homo sapiens<br>GN=DAB2IP<br>PE=1 SV=2 - [DAB2P_HUMAN]                 | 8.24  | 2 | 8  | 11 | 16  | 2.657 | 0.918 | 1.052 | 1.363 | 27.35  | 8.24  | 14 | 16  | 1189 | 131.5 | 8.72 |
| Q5MNZ9 | WD repeat domain phosphoinositide-interacting protein 1<br>OS=Homo sapiens<br>GN=WIP11<br>PE=1 SV=3 - [WIP11_HUMAN] | 3.81  | 1 | 2  | 2  | 3   | 1.088 | 0.705 | 0.752 | 1.363 | 7.41   | 3.81  | 2  | 3   | 446  | 48.6  | 6.60 |



|        |                                                                                                                         |       |   |    |    |     |       |       |       |       |        |       |    |     |      |       |      |
|--------|-------------------------------------------------------------------------------------------------------------------------|-------|---|----|----|-----|-------|-------|-------|-------|--------|-------|----|-----|------|-------|------|
| O60885 | Bromodomain-containing protein 4<br>OS=Homo sapiens<br>GN=BRD4<br>PE=1 SV=2 - [BRD4_HUMAN]                              | 4.48  | 1 | 4  | 5  | 13  | 1.822 | 1.345 | 0.982 | 1.363 | 17.02  | 4.48  | 7  | 13  | 1362 | 152.1 | 9.19 |
| P48735 | Isocitrate dehydrogenase [NADP], mitochondrial<br>OS=Homo sapiens<br>GN=IDH2 PE=1 SV=2 - [IDH2_HUMAN]                   | 45.58 | 1 | 19 | 19 | 107 | 0.888 | 1.477 | 0.952 | 1.363 | 234.23 | 45.58 | 32 | 107 | 452  | 50.9  | 8.69 |
| P08183 | Multidrug resistance protein 1<br>OS=Homo sapiens<br>GN=ABCB1<br>PE=1 SV=3 - [MDR1_HUMAN]                               | 1.48  | 1 | 2  | 2  | 2   | 0.851 | 0.967 | 1.696 | 1.364 | 2.21   | 1.48  | 2  | 2   | 1280 | 141.4 | 9.00 |
| Q9NTJ4 | Alpha-mannosidase 2C1 OS=Homo sapiens<br>GN=MAN2C1<br>PE=1 SV=1 - [MA2C1_HUMAN]                                         | 3.27  | 1 | 5  | 5  | 8   | 1.268 | 1.217 | 1.204 | 1.364 | 7.08   | 3.27  | 7  | 8   | 1040 | 115.8 | 6.57 |
| P19387 | DNA-directed RNA polymerase II subunit RPB3<br>OS=Homo sapiens<br>GN=POLR2C<br>PE=1 SV=2 - [RPB3_HUMAN]                 | 22.55 | 1 | 4  | 4  | 6   | 1.402 | 1.491 | 0.940 | 1.364 | 10.07  | 22.55 | 6  | 6   | 275  | 31.4  | 4.92 |
| P49959 | Double-strand break repair protein MRE11A<br>OS=Homo sapiens<br>GN=MRE11A<br>PE=1 SV=3 - [MRE11_HUMAN]                  | 19.49 | 1 | 14 | 14 | 37  | 0.895 | 1.320 | 0.878 | 1.365 | 61.54  | 19.49 | 22 | 37  | 708  | 80.5  | 5.90 |
| Q02410 | Amyloid beta A4 precursor protein-binding family A member 1<br>OS=Homo sapiens<br>GN=APBA1<br>PE=1 SV=3 - [APBA1_HUMAN] | 5.62  | 1 | 4  | 4  | 13  | 1.597 | 0.707 | 1.069 | 1.366 | 25.93  | 5.62  | 6  | 13  | 837  | 92.8  | 4.93 |
| Q9NQ78 | Kinesin-like protein KIF13B<br>OS=Homo sapiens<br>GN=KIF13B<br>PE=1 SV=2 - [KI13B_HUMAN]                                | 8.54  | 1 | 10 | 16 | 40  | 1.462 | 1.340 | 1.251 | 1.366 | 107.71 | 8.54  | 24 | 40  | 1826 | 202.7 | 5.88 |

|        |                                                                                                                |       |   |    |    |    |       |       |       |       |        |       |    |    |      |       |      |
|--------|----------------------------------------------------------------------------------------------------------------|-------|---|----|----|----|-------|-------|-------|-------|--------|-------|----|----|------|-------|------|
| O60216 | Double-strand-break repair protein rad21 homolog<br>OS=Homo sapiens<br>GN=RAD21<br>PE=1 SV=2 - [RAD21_HUMAN]   | 9.67  | 1 | 4  | 4  | 13 | 1.257 | 1.032 | 0.788 | 1.366 | 36.03  | 9.67  | 7  | 13 | 631  | 71.6  | 4.65 |
| Q96HJ3 | Coiled-coil domain-containing protein 34<br>OS=Homo sapiens<br>GN=CCDC34<br>PE=2 SV=2 - [CCDC34_HUMAN]         | 2.41  | 1 | 1  | 1  | 2  | 1.886 | 0.744 | 0.679 | 1.366 | 0.00   | 2.41  | 1  | 2  | 373  | 43.2  | 7.40 |
| Q9GZR7 | ATP-dependent RNA helicase DDX24<br>OS=Homo sapiens<br>GN=DDX24<br>PE=1 SV=1 - [DDX24_HUMAN]                   | 21.65 | 2 | 16 | 17 | 38 | 0.930 | 0.866 | 0.915 | 1.366 | 100.78 | 21.65 | 22 | 38 | 859  | 96.3  | 9.06 |
| Q496A3 | Spermatogenesis-associated serine-rich protein 1<br>OS=Homo sapiens<br>GN=SPATS1<br>PE=2 SV=2 - [SPATS1_HUMAN] | 2.33  | 1 | 1  | 1  | 2  | 0.616 | 0.549 | 1.180 | 1.366 | 4.79   | 2.33  | 1  | 2  | 300  | 33.7  | 7.46 |
| Q7Z6K5 | Arpin<br>OS=Homo sapiens<br>GN=ARPIN<br>PE=1 SV=1 - [ARPIN_HUMAN]                                              | 23.01 | 1 | 3  | 4  | 6  | 1.398 | 1.327 | 1.083 | 1.366 | 14.59  | 23.01 | 5  | 6  | 226  | 24.9  | 5.83 |
| Q8N131 | Porimin<br>OS=Homo sapiens<br>GN=TMEM123<br>PE=1 SV=1 - [PORIM_HUMAN]                                          | 4.33  | 1 | 1  | 1  | 1  | 0.935 | 1.133 | 1.294 | 1.367 | 0.00   | 4.33  | 1  | 1  | 208  | 21.5  | 8.70 |
| Q96JI7 | Spatacsin<br>OS=Homo sapiens<br>GN=SPG11<br>PE=1 SV=3 - [SPTCS_HUMAN]                                          | 0.82  | 1 | 2  | 2  | 4  | 0.854 | 1.457 | 1.923 | 1.368 | 7.40   | 0.82  | 2  | 4  | 2443 | 278.7 | 5.97 |
| O95232 | Luc7-like protein 3<br>OS=Homo sapiens<br>GN=LUC7L3<br>PE=1 SV=2 - [LC7L3_HUMAN]                               | 14.81 | 1 | 5  | 6  | 11 | 0.928 | 0.804 | 0.657 | 1.368 | 28.12  | 14.81 | 10 | 11 | 432  | 51.4  | 9.79 |
| O94766 | Galactosylgalactosyltransferase 3<br>OS=Homo sapiens<br>GN=B3GAT3<br>PE=1 SV=2 - [B3GA3_HUMAN]                 | 13.73 | 1 | 3  | 3  | 8  | 0.858 | 0.861 | 0.992 | 1.368 | 22.68  | 13.73 | 5  | 8  | 335  | 37.1  | 8.27 |

|        |                                                                                                                |       |   |    |    |    |       |       |       |       |       |       |    |    |      |       |       |
|--------|----------------------------------------------------------------------------------------------------------------|-------|---|----|----|----|-------|-------|-------|-------|-------|-------|----|----|------|-------|-------|
| Q08945 | FACT complex subunit SSRP1 OS=Homo sapiens GN=SSRP1 PE=1 SV=1 - [SSRP1_HUMAN]                                  | 17.21 | 1 | 14 | 14 | 37 | 1.025 | 1.361 | 0.891 | 1.368 | 79.72 | 17.21 | 20 | 37 | 709  | 81.0  | 6.87  |
| Q9ULW3 | Activator of basal transcription 1 OS=Homo sapiens GN=ABT1 PE=1 SV=1 - [ABT1_HUMAN]                            | 2.57  | 1 | 1  | 1  | 2  | 0.852 | 1.086 | 1.284 | 1.369 | 2.04  | 2.57  | 2  | 2  | 272  | 31.1  | 9.88  |
| P62875 | DNA-directed RNA polymerases I, II, and III subunit RPABC5 OS=Homo sapiens GN=POLR2L PE=1 SV=1 - [RPABS_HUMAN] | 29.85 | 1 | 2  | 2  | 6  | 1.114 | 1.145 | 1.028 | 1.369 | 17.17 | 29.85 | 4  | 6  | 67   | 7.6   | 7.77  |
| Q15154 | Pericentriolar material 1 protein OS=Homo sapiens GN=PCM1 PE=1 SV=4 - [PCM1_HUMAN]                             | 7.02  | 1 | 11 | 12 | 25 | 0.908 | 1.501 | 1.151 | 1.369 | 60.70 | 7.02  | 17 | 25 | 2024 | 228.4 | 5.02  |
| Q13393 | Phospholipase D1 OS=Homo sapiens GN=PLD1 PE=1 SV=1 - [PLD1_HUMAN]                                              | 6.33  | 1 | 8  | 8  | 12 | 1.670 | 1.061 | 0.864 | 1.370 | 27.66 | 6.33  | 11 | 12 | 1074 | 124.1 | 8.78  |
| Q9NW64 | Pre-mRNA-splicing factor RBM22 OS=Homo sapiens GN=RBM22 PE=1 SV=1 - [RBM22_HUMAN]                              | 14.76 | 1 | 5  | 6  | 13 | 1.310 | 0.963 | 1.152 | 1.370 | 18.88 | 14.76 | 8  | 13 | 420  | 46.9  | 8.54  |
| O95707 | Ribonuclease P protein subunit p29 OS=Homo sapiens GN=POP4 PE=1 SV=2 - [RPP29_HUMAN]                           | 4.55  | 1 | 1  | 1  | 3  | 0.915 | 0.831 | 0.752 | 1.370 | 2.46  | 4.55  | 2  | 3  | 220  | 25.4  | 10.07 |
| P01213 | Proenkephalin-B OS=Homo sapiens GN=PDYN PE=1 SV=1 - [PDYN_HUMAN]                                               | 3.54  | 1 | 1  | 1  | 1  | 1.019 | 1.299 | 1.257 | 1.370 | 1.97  | 3.54  | 1  | 1  | 254  | 28.4  | 6.30  |
| Q96J01 | THO complex subunit 3 OS=Homo sapiens GN=THOC3 PE=1 SV=1 - [THOC3_HUMAN]                                       | 2.56  | 1 | 1  | 1  | 1  | 0.958 | 1.378 | 0.911 | 1.371 | 2.54  | 2.56  | 1  | 1  | 351  | 38.7  | 6.09  |

|        |                                                                                                                |       |   |    |    |    |       |       |       |       |       |       |     |      |      |       |      |
|--------|----------------------------------------------------------------------------------------------------------------|-------|---|----|----|----|-------|-------|-------|-------|-------|-------|-----|------|------|-------|------|
| Q9BRP1 | Programmed cell death protein 2-like OS=Homo sapiens<br>GN=PDCD2L<br>PE=1 SV=1 - [PDCD2L_HUMAN]                | 5.03  | 1 | 1  | 1  | 1  | 0.966 | 1.371 | 2.96  | 5.03  | 1     | 1     | 358 | 39.4 | 4.86 |       |      |
| P36269 | Gamma-glutamyltransferase 5 OS=Homo sapiens<br>GN=GGT5<br>PE=1 SV=2 - [GGT5_HUMAN]                             | 17.92 | 1 | 9  | 9  | 28 | 1.364 | 0.616 | 0.355 | 1.371 | 74.07 | 17.92 | 16  | 28   | 586  | 62.2  | 7.55 |
| O43395 | U4/U6 small nuclear ribonucleoprotein Prp3 OS=Homo sapiens<br>GN=PRPF3<br>PE=1 SV=2 - [PRPF3_HUMAN]            | 20.20 | 1 | 12 | 12 | 21 | 1.082 | 1.241 | 1.068 | 1.371 | 34.63 | 20.20 | 18  | 21   | 683  | 77.5  | 9.50 |
| Q8N111 | Cell cycle exit and neuronal differentiation protein 1 OS=Homo sapiens<br>GN=CEND1<br>PE=2 SV=1 - [CEND_HUMAN] | 15.44 | 1 | 2  | 2  | 2  | 1.692 | 2.321 | 1.166 | 1.371 | 4.76  | 15.44 | 2   | 2    | 149  | 14.9  | 9.20 |
| Q6JQN1 | Acyl-CoA dehydrogenase family member 10 OS=Homo sapiens<br>GN=ACAD10<br>PE=2 SV=1 - [ACD10_HUMAN]              | 5.67  | 1 | 6  | 6  | 10 | 0.954 | 1.689 | 1.301 | 1.371 | 17.58 | 5.67  | 8   | 10   | 1059 | 118.8 | 8.06 |
| Q8N2G8 | GH3 domain-containing protein OS=Homo sapiens<br>GN=GHDC<br>PE=1 SV=2 - [GHDC_HUMAN]                           | 8.87  | 1 | 5  | 6  | 14 | 1.095 | 1.067 | 0.867 | 1.372 | 33.54 | 8.87  | 10  | 14   | 530  | 57.5  | 7.88 |
| Q9BXS9 | Solute carrier family 26 member 6 OS=Homo sapiens<br>GN=SLC26A6<br>PE=1 SV=1 - [S26A6_HUMAN]                   | 0.92  | 1 | 1  | 1  | 2  | 1.627 | 1.436 | 0.899 | 1.372 | 4.67  | 0.92  | 1   | 2    | 759  | 82.9  | 8.37 |
| O43933 | Peroxisome biogenesis factor 1 OS=Homo sapiens<br>GN=PEX1<br>PE=1 SV=1 - [PEX1_HUMAN]                          | 2.10  | 1 | 2  | 3  | 8  | 1.003 | 1.124 | 1.191 | 1.373 | 20.16 | 2.10  | 4   | 8    | 1283 | 142.8 | 6.33 |

|        |                                                                                                                             |       |   |   |    |    |       |       |       |       |        |       |    |    |      |       |       |
|--------|-----------------------------------------------------------------------------------------------------------------------------|-------|---|---|----|----|-------|-------|-------|-------|--------|-------|----|----|------|-------|-------|
| Q9H6R4 | Nucleolar protein 6<br>OS=Homo sapiens<br>GN=NOL6<br>PE=1 SV=2 - [NOL6_HUMAN]                                               | 6.72  | 1 | 7 | 8  | 13 | 0.813 | 0.806 | 0.771 | 1.373 | 20.90  | 6.72  | 10 | 13 | 1146 | 127.5 | 7.64  |
| Q96I59 | Probable asparagine--tRNA ligase, mitochondrial<br>OS=Homo sapiens<br>GN=NARS2<br>PE=1 SV=3 - [SYNM_HUMAN]                  | 3.98  | 1 | 2 | 2  | 3  | 0.848 | 1.228 | 1.185 | 1.374 | 5.33   | 3.98  | 2  | 3  | 477  | 54.1  | 7.24  |
| Q12851 | Mitogen-activated protein kinase kinase kinase 2<br>OS=Homo sapiens<br>GN=MAP4K2<br>PE=1 SV=2 - [M4K2_HUMAN]                | 2.20  | 1 | 1 | 2  | 2  | 1.264 | 0.756 | 0.782 | 1.374 | 4.63   | 2.20  | 2  | 2  | 820  | 91.5  | 6.34  |
| Q5T9A4 | ATPase family AAA domain-containing protein 3B<br>OS=Homo sapiens<br>GN=ATAD3B<br>PE=1 SV=1 - [ATD3B_HUMAN]                 | 27.47 | 1 | 1 | 17 | 78 | 1.440 | 1.430 | 0.786 | 1.374 | 200.81 | 27.47 | 26 | 78 | 648  | 72.5  | 9.20  |
| Q9Y5J9 | Mitochondrial import inner membrane translocase subunit Tim8 B<br>OS=Homo sapiens<br>GN=TIMM8B<br>PE=1 SV=1 - [TIM8B_HUMAN] | 40.96 | 1 | 4 | 4  | 7  | 0.720 | 0.788 | 0.845 | 1.374 | 12.61  | 40.96 | 5  | 7  | 83   | 9.3   | 5.12  |
| Q9Y2H5 | Pleckstrin homology domain-containing family A member 6<br>OS=Homo sapiens<br>GN=PLEKHA6<br>PE=1 SV=4 - [PKHA6_HUMAN]       | 6.20  | 1 | 6 | 8  | 11 | 1.317 | 0.460 | 1.065 | 1.375 | 12.89  | 6.20  | 9  | 11 | 1048 | 117.1 | 9.10  |
| P55769 | NHP2-like protein 1<br>OS=Homo sapiens<br>GN=NHP2L1<br>PE=1 SV=3 - [NH2L1_HUMAN]                                            | 39.84 | 1 | 3 | 3  | 10 | 0.931 | 0.966 | 0.972 | 1.375 | 27.03  | 39.84 | 5  | 10 | 128  | 14.2  | 8.46  |
| A6NGC4 | TLC domain-containing protein 2<br>OS=Homo sapiens<br>GN=TLCD2<br>PE=2 SV=3 - [TLCD2_HUMAN]                                 | 3.79  | 1 | 1 | 1  | 4  | 0.408 | 0.868 | 0.584 | 1.376 | 11.86  | 3.79  | 2  | 4  | 264  | 28.7  | 10.10 |

|        |                                                                                                                                           |       |   |   |    |     |       |       |       |        |       |       |     |     |      |       |      |
|--------|-------------------------------------------------------------------------------------------------------------------------------------------|-------|---|---|----|-----|-------|-------|-------|--------|-------|-------|-----|-----|------|-------|------|
| Q9Y3A4 | Ribosomal RNA-processing protein 7 homolog A<br>OS=Homo sapiens<br>GN=RRP7A<br>PE=1 SV=2 - [RRP7A_HUMAN]                                  | 11.07 | 2 | 3 | 3  | 5   | 1.213 | 1.081 | 1.030 | 1.376  | 10.64 | 11.07 | 5   | 5   | 280  | 32.3  | 9.58 |
| C9JR72 | Kelch repeat and BTB domain-containing protein 13<br>OS=Homo sapiens<br>GN=KBTBD13<br>PE=1 SV=1 - [KBTBD_HUMAN CB1]                       | 4.80  | 1 | 1 | 1  | 3   | 1.268 | 1.776 | 1.658 | 1.376  | 0.00  | 4.80  | 1   | 3   | 458  | 49.5  | 5.71 |
| Q96F85 | cannabinoid receptor-interacting protein 1<br>OS=Homo sapiens<br>GN=CNRIP1<br>PE=1 SV=1 - [CNRIP1_HUMAN]                                  | 45.73 | 1 | 7 | 7  | 14  | 1.611 | 1.026 | 0.850 | 1.376  | 37.45 | 45.73 | 9   | 14  | 164  | 18.6  | 7.94 |
| P84243 | Histone H3.3<br>OS=Homo sapiens<br>GN=H3F3A<br>PE=1 SV=2 - [H33_HUMAN]                                                                    | 59.56 | 2 | 2 | 10 | 142 | 3.217 | 0.612 | 1.377 | 270.79 | 59.56 | 13    | 142 | 136 | 15.3 | 11.27 |      |
| O14874 | [3-methyl-2-oxobutanoate dehydrogenase [lipamide]]<br>kinase,<br>mitochondrial<br>OS=Homo sapiens<br>GN=BCKDK<br>PE=1 SV=2 - [BCKD_HUMAN] | 13.83 | 1 | 4 | 4  | 14  | 1.434 | 1.591 | 1.636 | 1.377  | 22.61 | 13.83 | 8   | 14  | 412  | 46.3  | 8.82 |
| Q13057 | Bifunctional coenzyme A synthase<br>OS=Homo sapiens<br>GN=COASY<br>PE=1 SV=4 - [COASY_HUMAN]                                              | 7.45  | 1 | 4 | 4  | 9   | 1.086 | 0.984 | 0.929 | 1.377  | 20.16 | 7.45  | 6   | 9   | 564  | 62.3  | 6.99 |
| Q9GZS1 | DNA-directed RNA polymerase I subunit RPA49<br>OS=Homo sapiens<br>GN=POLR1E<br>PE=1 SV=2 - [RPA49_HUMAN]                                  | 1.66  | 1 | 1 | 1  | 2   | 0.825 | 0.884 | 1.167 | 1.378  | 2.16  | 1.66  | 2   | 2   | 481  | 53.9  | 8.56 |
| Q8WUA2 | Peptidyl-prolyl cis-trans isomerase-like 4<br>OS=Homo sapiens<br>GN=PPIL4<br>PE=1 SV=1 - [PPIL4_HUMAN]                                    | 5.28  | 1 | 2 | 2  | 6   | 0.987 | 1.491 | 1.184 | 1.378  | 19.12 | 5.28  | 4   | 6   | 492  | 57.2  | 5.92 |

|        |                                                                                                                            |       |    |    |    |    |       |       |       |       |       |       |    |    |      |       |       |
|--------|----------------------------------------------------------------------------------------------------------------------------|-------|----|----|----|----|-------|-------|-------|-------|-------|-------|----|----|------|-------|-------|
| Q9BYB4 | Guanine nucleotide-binding protein subunit beta-like protein 1<br>OS=Homo sapiens<br>GN=GNB1L<br>PE=1 SV=2 - [GNB1L_HUMAN] | 2.75  | 1  | 1  | 1  | 1  | 0.913 | 0.591 | 0.688 | 1.379 | 0.00  | 2.75  | 1  | 1  | 327  | 35.6  | 7.97  |
| Q5SNV9 | Uncharacterized protein C1orf167<br>OS=Homo sapiens<br>GN=C1orf167<br>PE=2 SV=2 - [CA167_HUMAN]                            | 0.75  | 1  | 1  | 1  | 1  | 1.201 | 0.316 | 0.440 | 1.379 | 1.64  | 0.75  | 1  | 1  | 1468 | 162.3 | 10.70 |
| P51522 | Zinc finger protein 83<br>OS=Homo sapiens<br>GN=ZNF83<br>PE=2 SV=3 - [ZNF83_HUMAN]                                         | 15.89 | 94 | 1  | 2  | 3  | 1.838 | 2.833 | 1.742 | 1.379 | 2.61  | 15.89 | 2  | 3  | 516  | 59.7  | 9.22  |
| Q8IX01 | SURP and G-patch domain-containing protein 2<br>OS=Homo sapiens<br>GN=SUGP2<br>PE=1 SV=2 - [SUGP2_HUMAN]                   | 10.91 | 1  | 10 | 10 | 21 | 1.156 | 1.131 | 0.909 | 1.380 | 39.40 | 10.91 | 16 | 21 | 1082 | 120.1 | 7.28  |
| Q9C004 | Protein sprouty homolog 4<br>OS=Homo sapiens<br>GN=SPRY4<br>PE=1 SV=2 - [SPRY4_HUMAN]                                      | 7.36  | 1  | 2  | 2  | 4  | 1.202 | 0.691 | 1.691 | 1.380 | 8.61  | 7.36  | 3  | 4  | 299  | 32.5  | 7.88  |
| Q96EL3 | 39S ribosomal protein L53, mitochondrial<br>OS=Homo sapiens<br>GN=MRPL53<br>PE=1 SV=1 - [RMS53_HUMAN]                      | 24.11 | 1  | 2  | 2  | 4  | 1.147 | 0.818 | 1.211 | 1.381 | 10.28 | 24.11 | 4  | 4  | 112  | 12.1  | 8.76  |
| Q9Y2H6 | Fibronectin type-III domain-containing protein 3A<br>OS=Homo sapiens<br>GN=FNDC3A<br>PE=1 SV=4 - [FNDC3A_HUMAN]            | 10.60 | 1  | 12 | 12 | 39 | 1.558 | 1.065 | 0.595 | 1.383 | 97.91 | 10.60 | 21 | 39 | 1198 | 131.8 | 6.71  |
| Q92879 | CUGBP Elav-like family member 1<br>OS=Homo sapiens<br>GN=CELF1<br>PE=1 SV=2 - [CELF1_HUMAN]                                | 8.44  | 1  | 3  | 4  | 11 | 1.639 | 1.217 | 0.952 | 1.383 | 18.96 | 8.44  | 6  | 11 | 486  | 52.0  | 8.46  |

|        |                                                              |                                                                      |       |   |    |    |    |       |       |       |       |        |       |    |    |      |       |      |
|--------|--------------------------------------------------------------|----------------------------------------------------------------------|-------|---|----|----|----|-------|-------|-------|-------|--------|-------|----|----|------|-------|------|
| P05166 | Propionyl-CoA<br>carboxylase<br>beta chain,<br>mitochondrial | OS=Homo<br>sapiens<br>GN=PCCB<br>PE=1 SV=3 -<br>[PCCB_HUMAN]         | 17.44 | 1 | 7  | 7  | 24 | 1.106 | 1.476 | 1.347 | 1.384 | 75.44  | 17.44 | 14 | 24 | 539  | 58.2  | 7.64 |
| Q9H974 | Queuine tRNA-<br>ribosyltransfera<br>se subunit<br>QTRTD1    | OS=Homo<br>sapiens<br>GN=QTRTD1<br>PE=1 SV=1 -<br>[QTRD1_HUMA<br>N]  | 6.27  | 1 | 2  | 2  | 5  | 1.056 | 1.374 | 1.103 | 1.384 | 12.26  | 6.27  | 4  | 5  | 415  | 46.7  | 6.81 |
| P23219 | Prostaglandin<br>G/H synthase 1                              | OS=Homo<br>sapiens<br>GN=PTGS1<br>PE=1 SV=2 -<br>[PGH1_HUMAN]        | 25.04 | 1 | 12 | 12 | 50 | 1.432 | 1.099 | 0.927 | 1.384 | 135.22 | 25.04 | 20 | 50 | 599  | 68.6  | 7.23 |
| O75400 | Pre-mRNA-<br>processing<br>factor 40<br>homolog A            | OS=Homo<br>sapiens<br>GN=PRPF40A<br>PE=1 SV=2 -<br>[PR40A_HUMAN<br>] | 20.06 | 2 | 21 | 21 | 53 | 1.018 | 1.206 | 0.888 | 1.385 | 132.84 | 20.06 | 28 | 53 | 957  | 108.7 | 7.56 |
| O75694 | Nuclear pore<br>complex<br>protein<br>Nup155                 | OS=Homo<br>sapiens<br>GN=NUP155<br>PE=1 SV=1 -<br>[NUP155_HUMAN]     | 12.15 | 1 | 12 | 12 | 43 | 1.045 | 0.993 | 0.894 | 1.386 | 105.43 | 12.15 | 18 | 43 | 1391 | 155.1 | 6.16 |
| Q14137 | Ribosome<br>biogenesis<br>protein BOP1                       | OS=Homo<br>sapiens<br>GN=BOP1<br>PE=1 SV=2 -<br>[BOP1_HUMAN]         | 12.20 | 1 | 9  | 9  | 20 | 0.831 | 1.036 | 0.915 | 1.386 | 49.46  | 12.20 | 15 | 20 | 746  | 83.6  | 6.19 |
| O75367 | Core histone<br>macro-H2A.1                                  | OS=Homo<br>sapiens<br>GN=H2AFY<br>PE=1 SV=4 -<br>[H2AY_HUMAN]        | 48.12 | 1 | 17 | 18 | 76 | 1.134 | 1.404 | 1.091 | 1.386 | 196.26 | 48.12 | 27 | 76 | 372  | 39.6  | 9.79 |
| O96028 | Histone-lysine N-<br>methyltransfer<br>ase NSD2              | OS=Homo<br>sapiens<br>GN=WHSC1<br>PE=1 SV=1 -<br>[NSD2_HUMAN]        | 0.51  | 3 | 1  | 1  | 1  | 0.477 | 1.801 | 1.177 | 1.387 | 0.00   | 0.51  | 1  | 1  | 1365 | 152.2 | 8.69 |



|        |                                                                                                                                |       |   |    |    |    |       |       |       |       |       |       |    |     |       |       |      |
|--------|--------------------------------------------------------------------------------------------------------------------------------|-------|---|----|----|----|-------|-------|-------|-------|-------|-------|----|-----|-------|-------|------|
| Q92889 | DNA repair<br>endonuclease<br>XPF OS=Homo<br>sapiens<br>GN=ERCC4<br>PE=1 SV=3 -<br>[XPF_HUMAN]                                 | 1.31  | 1 | 1  | 1  | 9  | 1.157 | 1.147 | 1.091 | 1.387 | 18.89 | 1.31  | 2  | 9   | 916   | 104.4 | 6.93 |
| Q14517 | Protocadherin<br>Fat 1<br>OS=Homo<br>sapiens<br>GN=FAT1<br>PE=1 SV=2 -<br>[FAT1_HUMAN]                                         | 6.12  | 1 | 20 | 20 | 32 | 1.265 | 0.582 | 0.779 | 1.387 | 69.06 | 6.12  | 25 | 32  | 4588  | 506.0 | 5.00 |
| Q13232 | Nucleoside<br>diphosphate<br>kinase 3<br>OS=Homo<br>sapiens<br>GN=NME3<br>PE=1 SV=2 -<br>[NDK3_HUMAN]                          | 40.83 | 1 | 6  | 6  | 19 | 1.627 | 0.847 | 0.554 | 1.387 | 33.27 | 40.83 | 9  | 19  | 169   | 19.0  | 7.84 |
| O43823 | A-kinase<br>anchor protein<br>8 OS=Homo<br>sapiens<br>GN=AKAP8<br>PE=1 SV=1 -<br>[AKAP8_HUMAN<br>]                             | 6.79  | 1 | 5  | 5  | 9  | 1.439 | 1.471 | 1.197 | 1.387 | 19.13 | 6.79  | 7  | 9   | 692   | 76.1  | 5.15 |
| Q9HCN4 | GPN-loop<br>GTPase 1<br>OS=Homo<br>sapiens<br>GN=GPNI<br>PE=1 SV=1 -<br>[GPNI_HUMAN]                                           | 6.68  | 1 | 2  | 2  | 5  | 0.962 | 1.083 | 0.874 | 1.388 | 12.25 | 6.68  | 3  | 5   | 374   | 41.7  | 4.92 |
| P32239 | Gastrin/cholecys<br>tokinin type B<br>receptor<br>OS=Homo<br>sapiens<br>GN=CCKBR<br>PE=1 SV=1 -<br>[GASR_HUMAN]                | 5.59  | 1 | 1  | 1  | 1  | 3.767 | 1.510 | 3.514 | 1.388 | 2.46  | 5.59  | 1  | 1   | 447   | 48.4  | 9.96 |
| Q96C23 | Aldose 1-<br>epimerase<br>OS=Homo<br>sapiens<br>GN=GALM<br>PE=1 SV=1 -<br>[GALM_HUMAN]                                         | 26.32 | 1 | 7  | 7  | 22 | 1.543 | 0.853 | 0.647 | 1.388 | 47.15 | 26.32 | 9  | 22  | 342   | 37.7  | 6.65 |
| Q9BVA0 | Katanin p80<br>WD40 repeat-<br>containing<br>subunit B1<br>OS=Homo<br>sapiens<br>GN=KATNB1<br>PE=1 SV=1 -<br>[KTNB1_HUMAN<br>] | 5.19  | 1 | 2  | 2  | 9  | 1.913 | 1.173 | 1.038 | 1.388 | 41.63 | 5.19  | 2  | 9   | 655   | 72.3  | 7.56 |
| Q9UFE4 | Coiled-coil<br>domain-<br>containing<br>protein 39<br>OS=Homo<br>sapiens<br>GN=CCDC39<br>PE=2 SV=3 -<br>[CCDC39_HUMAN<br>]     | 3.08  | 1 | 1  | 2  | 5  | 3.753 | 5.616 | 1.389 | 0.00  | 3.08  | 2     | 5  | 941 | 109.8 | 6.44  |      |

|        |                                                                                                                           |       |   |   |    |    |       |       |       |       |       |       |    |    |      |       |       |
|--------|---------------------------------------------------------------------------------------------------------------------------|-------|---|---|----|----|-------|-------|-------|-------|-------|-------|----|----|------|-------|-------|
| Q6PD62 | RNA polymerase-associated protein CTR9 homolog<br>OS=Homo sapiens<br>GN=CTR9<br>PE=1 SV=1 - [CTR9_HUMAN]                  | 5.03  | 1 | 3 | 6  | 11 | 1.095 | 0.857 | 0.960 | 1.389 | 33.80 | 5.03  | 7  | 11 | 1173 | 133.4 | 6.77  |
| Q96H09 | UPF0562 protein C7orf55<br>OS=Homo sapiens<br>GN=C7orf55<br>PE=1 SV=2 - [CG055_HUMAN]                                     | 28.32 | 1 | 3 | 3  | 5  | 1.880 | 1.329 | 1.312 | 1.389 | 9.95  | 28.32 | 4  | 5  | 113  | 12.7  | 10.07 |
| Q09161 | Nuclear cap-binding protein subunit 1<br>OS=Homo sapiens<br>GN=NCBP1<br>PE=1 SV=1 - [NCBP1_HUMAN]                         | 6.58  | 1 | 5 | 6  | 27 | 1.261 | 1.111 | 0.837 | 1.389 | 63.24 | 6.58  | 8  | 27 | 790  | 91.8  | 6.43  |
| Q9UPY3 | Endoribonuclease Dicer<br>OS=Homo sapiens<br>GN=DICER1<br>PE=1 SV=3 - [DICER_HUMAN]                                       | 2.13  | 1 | 3 | 3  | 5  | 0.795 | 1.178 | 1.247 | 1.389 | 5.87  | 2.13  | 5  | 5  | 1922 | 218.5 | 5.68  |
| Q13330 | Metastasis-associated protein MTA1<br>OS=Homo sapiens<br>GN=MTA1<br>PE=1 SV=2 - [MTA1_HUMAN]                              | 16.50 | 1 | 7 | 10 | 21 | 0.973 | 1.418 | 1.090 | 1.390 | 39.62 | 16.50 | 14 | 21 | 715  | 80.7  | 9.26  |
| Q13426 | DNA repair protein XRCC4<br>OS=Homo sapiens<br>GN=XRCC4<br>PE=1 SV=2 - [XRCC4_HUMAN]                                      | 5.36  | 1 | 2 | 2  | 2  | 1.181 | 1.896 | 1.659 | 1.390 | 2.25  | 5.36  | 2  | 2  | 336  | 38.3  | 4.98  |
| A4D1F6 | Leucine-rich repeat and death domain-containing protein 1<br>OS=Homo sapiens<br>GN=LRRD1<br>PE=2 SV=2 - [LRRD1_HUMAN]     | 3.49  | 1 | 2 | 2  | 14 | 2.368 | 1.298 | 0.995 | 1.390 | 0.00  | 3.49  | 2  | 14 | 860  | 98.0  | 7.46  |
| Q99643 | Succinate dehydrogenase cytochrome b560 subunit, mitochondrial<br>OS=Homo sapiens<br>GN=SDHC<br>PE=1 SV=1 - [CS560_HUMAN] | 9.47  | 1 | 1 | 1  | 1  | 2.758 | 1.975 | 1.452 | 1.392 | 2.64  | 9.47  | 1  | 1  | 169  | 18.6  | 9.69  |

|        |                                                                                                                              |       |   |   |   |    |       |       |       |       |       |       |   |    |      |       |      |
|--------|------------------------------------------------------------------------------------------------------------------------------|-------|---|---|---|----|-------|-------|-------|-------|-------|-------|---|----|------|-------|------|
| Q8WVM7 | Cohesin subunit SA-1<br>OS=Homo sapiens<br>GN=STAG1<br>PE=1 SV=3 - [STAG1_HUMAN]                                             | 4.21  | 1 | 5 | 7 | 9  | 1.756 | 0.768 | 0.741 | 1.392 | 17.19 | 4.21  | 8 | 9  | 1258 | 144.3 | 5.59 |
| O00712 | Nuclear factor 1 B-type<br>OS=Homo sapiens<br>GN=NFIB PE=1<br>SV=2 - [NFIB_HUMAN]                                            | 5.71  | 1 | 1 | 2 | 3  | 0.760 | 0.832 | 1.076 | 1.392 | 8.69  | 5.71  | 2 | 3  | 420  | 47.4  | 8.87 |
| Q96NY7 | Chloride intracellular channel protein 6<br>OS=Homo sapiens<br>GN=CLIC6<br>PE=2 SV=3 - [CLIC6_HUMAN]                         | 8.81  | 1 | 2 | 5 | 6  | 1.420 | 0.599 | 1.564 | 1.392 | 16.20 | 8.81  | 6 | 6  | 704  | 73.0  | 4.37 |
| O14548 | Cytochrome c oxidase subunit 7A-related protein, mitochondrial<br>OS=Homo sapiens<br>GN=COX7A2L<br>PE=1 SV=2 - [COX7R_HUMAN] | 33.33 | 1 | 4 | 4 | 6  | 1.648 | 0.980 | 0.799 | 1.393 | 16.78 | 33.33 | 5 | 6  | 114  | 12.6  | 9.42 |
| Q9Y6M7 | Sodium bicarbonate cotransporter 3<br>OS=Homo sapiens<br>GN=SLC4A7<br>PE=1 SV=2 - [S4A7_HUMAN]                               | 9.56  | 1 | 7 | 7 | 14 | 0.885 | 0.453 | 0.600 | 1.393 | 29.19 | 9.56  | 9 | 14 | 1214 | 136.0 | 6.71 |
| Q9UQ90 | Paraplegin<br>OS=Homo sapiens<br>GN=SPG7<br>PE=1 SV=2 - [SPG7_HUMAN]                                                         | 6.04  | 1 | 3 | 3 | 8  | 1.065 | 1.096 | 0.972 | 1.393 | 23.29 | 6.04  | 4 | 8  | 795  | 88.2  | 8.69 |
| Q9NUT2 | ATP-binding cassette sub-family B member 8, mitochondrial<br>OS=Homo sapiens<br>GN=ABCB8<br>PE=1 SV=3 - [ABCB8_HUMAN]        | 4.63  | 1 | 3 | 3 | 5  | 1.560 | 1.629 | 1.415 | 1.393 | 5.16  | 4.63  | 4 | 5  | 735  | 79.9  | 8.98 |
| Q8N9T8 | Protein KRI1 homolog<br>OS=Homo sapiens<br>GN=KRI1 PE=1<br>SV=3 - [KRI1_HUMAN]                                               | 7.54  | 1 | 5 | 6 | 17 | 1.088 | 0.893 | 0.913 | 1.393 | 24.53 | 7.54  | 8 | 17 | 703  | 82.5  | 5.14 |
| Q8WZ74 | Cortactin-binding protein 2<br>OS=Homo sapiens<br>GN=CTTNBP2<br>PE=1 SV=1 - [CTTB2_HUMAN]                                    | 1.92  | 2 | 1 | 4 | 5  | 1.156 | 2.390 | 1.611 | 1.393 | 6.69  | 1.92  | 4 | 5  | 1663 | 180.9 | 7.93 |

|        |                                                                                                                                                   |       |   |    |    |    |       |       |       |       |       |       |    |    |      |       |      |
|--------|---------------------------------------------------------------------------------------------------------------------------------------------------|-------|---|----|----|----|-------|-------|-------|-------|-------|-------|----|----|------|-------|------|
| O43676 | NADH<br>dehydrogenase<br>[ubiquinone] 1<br>beta<br>subcomplex<br>subunit 3<br>OS=Homo<br>sapiens<br>GN=NDUFB3<br>PE=1 SV=3 -<br>[NDUB3_HUMAN<br>] | 31.63 | 1 | 4  | 4  | 10 | 0.685 | 1.218 | 1.031 | 1.393 | 22.73 | 31.63 | 6  | 10 | 98   | 11.4  | 9.20 |
| P13500 | C-C motif<br>chemokine 2<br>OS=Homo<br>sapiens<br>GN=CCL2 PE=1<br>SV=1 -<br>[CCL2_HUMAN]                                                          | 17.17 | 3 | 2  | 2  | 2  | 0.903 | 0.299 | 0.544 | 1.393 | 2.87  | 17.17 | 2  | 2  | 99   | 11.0  | 9.25 |
| Q10570 | Cleavage and<br>polyadenylation<br>specificity<br>factor subunit<br>1 OS=Homo<br>sapiens<br>GN=CPSF1<br>PE=1 SV=2 -<br>[CPSF1_HUMAN<br>]          | 9.22  | 1 | 11 | 11 | 27 | 1.118 | 1.372 | 1.127 | 1.393 | 68.00 | 9.22  | 17 | 27 | 1443 | 160.8 | 6.40 |
| Q14722 | Voltage-gated<br>potassium<br>channel<br>subunit beta-1<br>OS=Homo<br>sapiens<br>GN=KCNAB1<br>PE=2 SV=1 -<br>[KCAB1_HUMAN<br>]                    | 3.10  | 1 | 1  | 2  | 2  | 3.186 | 2.062 | 1.064 | 1.394 | 2.09  | 3.10  | 2  | 2  | 419  | 46.5  | 8.94 |
| P39060 | Collagen alpha-<br>1(XVIII) chain<br>OS=Homo<br>sapiens<br>GN=COL18A1<br>PE=1 SV=5 -<br>[CO1A1_HUMAN<br>]                                         | 12.71 | 1 | 17 | 17 | 42 | 1.465 | 0.817 | 0.725 | 1.394 | 94.11 | 12.71 | 25 | 42 | 1754 | 178.1 | 6.01 |
| Q5H8A4 | GPI<br>ethanolamine<br>phosphate<br>transferase 2<br>OS=Homo<br>sapiens<br>GN=PIGG PE=1<br>SV=1 -<br>[PIGG_HUMAN]                                 | 3.66  | 1 | 2  | 3  | 4  | 1.084 | 0.970 | 1.052 | 1.394 | 6.96  | 3.66  | 4  | 4  | 983  | 108.1 | 7.15 |
| Q9BZL6 | Serine/threoni<br>ne-protein<br>kinase D2<br>OS=Homo<br>sapiens<br>GN=PRKD2<br>PE=1 SV=2 -<br>[KPCD2_HUMAN]                                       | 6.95  | 2 | 3  | 5  | 14 | 1.039 | 0.747 | 1.372 | 1.395 | 35.12 | 6.95  | 8  | 14 | 878  | 96.7  | 6.84 |
| Q16719 | Kynureninase<br>OS=Homo<br>sapiens<br>GN=KYNU<br>PE=1 SV=1 -<br>[KYNU_HUMAN]                                                                      | 18.49 | 1 | 7  | 8  | 14 | 7.489 | 0.557 | 0.482 | 1.395 | 27.26 | 18.49 | 11 | 14 | 465  | 52.3  | 7.03 |

|        |                                                                                                             |       |   |    |    |    |       |       |       |       |       |       |    |    |      |       |      |
|--------|-------------------------------------------------------------------------------------------------------------|-------|---|----|----|----|-------|-------|-------|-------|-------|-------|----|----|------|-------|------|
| Q8NDD1 | Uncharacterized protein<br>C1orf131<br>OS=Homo sapiens<br>GN=C1orf131<br>PE=1 SV=3 - [CA131_HUMAN]          | 5.78  | 8 | 1  | 2  | 6  | 0.963 | 0.913 | 0.911 | 1.395 | 15.76 | 5.78  | 2  | 6  | 294  | 32.7  | 9.92 |
| Q9NTJ3 | Structural maintenance of chromosomes protein 4<br>OS=Homo sapiens<br>GN=SMC4<br>PE=1 SV=2 - [SMC4_HUMAN]   | 6.60  | 1 | 8  | 8  | 20 | 1.335 | 1.298 | 0.745 | 1.395 | 42.54 | 6.60  | 13 | 20 | 1288 | 147.1 | 6.79 |
| P17676 | CCAAT/enhancer-binding protein beta<br>OS=Homo sapiens<br>GN=CEBPB<br>PE=1 SV=2 - [CEBPB_HUMAN]             | 11.30 | 1 | 4  | 4  | 14 | 1.156 | 1.317 | 1.096 | 1.395 | 24.23 | 11.30 | 5  | 14 | 345  | 36.1  | 8.31 |
| Q99549 | M-phase phosphoprotein 8<br>OS=Homo sapiens<br>GN=MPHOSPH8<br>PE=1 SV=2 - [MPP8_HUMAN]                      | 6.51  | 1 | 5  | 5  | 7  | 1.072 | 1.156 | 1.065 | 1.396 | 12.40 | 6.51  | 5  | 7  | 860  | 97.1  | 6.06 |
| P09601 | Heme oxygenase 1<br>OS=Homo sapiens<br>GN=HMOX1<br>PE=1 SV=1 - [HMOX1_HUMAN]                                | 32.29 | 1 | 10 | 10 | 28 | 0.480 | 1.389 | 1.122 | 1.396 | 74.37 | 32.29 | 13 | 28 | 288  | 32.8  | 8.25 |
| Q92796 | Disk large homolog 3<br>OS=Homo sapiens<br>GN=DLG3 PE=1 SV=2 - [DLG3_HUMAN]                                 | 4.16  | 1 | 2  | 4  | 10 | 1.465 | 1.555 | 1.181 | 1.396 | 16.25 | 4.16  | 4  | 10 | 817  | 90.3  | 7.03 |
| Q8N4C6 | Ninein<br>OS=Homo sapiens<br>GN=NIN PE=1 SV=4 - [NIN_HUMAN]                                                 | 1.82  | 1 | 2  | 5  | 32 | 1.574 | 0.819 | 1.463 | 1.397 | 61.60 | 1.82  | 6  | 32 | 2090 | 243.1 | 5.03 |
| Q9P1T7 | MyoD family inhibitor domain-containing protein<br>OS=Homo sapiens<br>GN=MDFIC<br>PE=1 SV=2 - [MDFIC_HUMAN] | 6.50  | 1 | 1  | 1  | 4  | 1.763 | 0.814 | 0.617 | 1.398 | 12.12 | 6.50  | 2  | 4  | 246  | 25.8  | 5.27 |
| P61244 | Protein max<br>OS=Homo sapiens<br>GN=MAX PE=1 SV=1 - [MAX_HUMAN]                                            | 6.25  | 1 | 1  | 1  | 2  | 0.916 | 1.150 | 0.959 | 1.398 | 2.42  | 6.25  | 2  | 2  | 160  | 18.3  | 6.30 |

|        |                                                                                                          |       |   |    |    |    |       |       |       |       |        |       |    |    |     |      |      |
|--------|----------------------------------------------------------------------------------------------------------|-------|---|----|----|----|-------|-------|-------|-------|--------|-------|----|----|-----|------|------|
| Q14684 | Ribosomal RNA processing protein 1 homolog B<br>OS=Homo sapiens<br>GN=RRP1B<br>PE=1 SV=3 - [RRP1B_HUMAN] | 15.70 | 1 | 10 | 10 | 17 | 0.922 | 1.112 | 0.885 | 1.399 | 25.96  | 15.70 | 13 | 17 | 758 | 84.4 | 9.76 |
| Q9BX40 | Protein LSM14 homolog B<br>OS=Homo sapiens<br>GN=LSM14B<br>PE=1 SV=1 - [LS14B_HUMAN]                     | 7.53  | 1 | 2  | 3  | 9  | 1.238 | 1.877 | 1.121 | 1.399 | 21.19  | 7.53  | 4  | 9  | 385 | 42.0 | 9.69 |
| Q7Z7A4 | PX domain-containing protein kinase-like protein<br>OS=Homo sapiens<br>GN=PXK PE=1 SV=1 - [PXK_HUMAN]    | 9.69  | 1 | 3  | 4  | 5  | 0.924 | 0.672 | 2.851 | 1.399 | 4.97   | 9.69  | 4  | 5  | 578 | 64.9 | 9.35 |
| Q9Y3T9 | Nucleolar complex protein 2 homolog<br>OS=Homo sapiens<br>GN=NOC2L<br>PE=1 SV=4 - [NOC2L_HUMAN]          | 4.01  | 1 | 4  | 4  | 7  | 0.689 | 0.862 | 0.800 | 1.400 | 15.01  | 4.01  | 6  | 7  | 749 | 84.9 | 5.62 |
| Q06265 | Exosome complex component RRP45<br>OS=Homo sapiens<br>GN=EXOSC9<br>PE=1 SV=3 - [EXOS9_HUMAN]             | 4.78  | 1 | 2  | 2  | 6  | 1.080 | 0.931 | 0.882 | 1.400 | 15.84  | 4.78  | 4  | 6  | 439 | 48.9 | 5.29 |
| P50453 | Serpin B9<br>OS=Homo sapiens<br>GN=SERPINB9<br>PE=1 SV=1 - [SPB9_HUMAN]                                  | 53.72 | 1 | 17 | 17 | 52 | 1.631 | 0.620 | 0.655 | 1.401 | 128.15 | 53.72 | 27 | 52 | 376 | 42.4 | 5.86 |
| Q6UWH4 | Protein FAM198B<br>OS=Homo sapiens<br>GN=FAM198B<br>PE=2 SV=1 - [F198B_HUMAN]                            | 8.09  | 1 | 4  | 4  | 7  | 0.487 | 1.034 | 0.607 | 1.401 | 21.43  | 8.09  | 7  | 7  | 519 | 57.5 | 9.70 |
| Q9NXJ5 | Pyroglutamyl-peptidase 1<br>OS=Homo sapiens<br>GN=PGPEP1<br>PE=1 SV=1 - [PGPI_HUMAN]                     | 7.66  | 1 | 1  | 1  | 3  | 0.886 | 1.038 | 1.408 | 1.401 | 8.24   | 7.66  | 2  | 3  | 209 | 23.1 | 5.90 |
| Q15291 | Retinoblastoma-binding protein 5<br>OS=Homo sapiens<br>GN=RBBP5<br>PE=1 SV=2 - [RBBP5_HUMAN]             | 9.29  | 1 | 3  | 3  | 5  | 1.052 | 1.149 | 1.007 | 1.401 | 15.16  | 9.29  | 4  | 5  | 538 | 59.1 | 5.10 |

|        |                                                                                                                                     |       |   |    |    |    |       |       |       |       |        |       |    |    |      |       |       |
|--------|-------------------------------------------------------------------------------------------------------------------------------------|-------|---|----|----|----|-------|-------|-------|-------|--------|-------|----|----|------|-------|-------|
| P84103 | Serine/arginine-rich splicing factor 3<br>OS=Homo sapiens<br>GN=SRSF3<br>PE=1 SV=1 - [SRSF3_HUMAN]                                  | 34.76 | 1 | 8  | 9  | 94 | 1.227 | 1.558 | 1.084 | 1.401 | 173.33 | 34.76 | 18 | 94 | 164  | 19.3  | 11.65 |
| Q9BYG4 | Partitioning defective 6 homolog gamma<br>OS=Homo sapiens<br>GN=PAR6G<br>PE=1 SV=1 - [PAR6G_HUMAN]                                  | 4.52  | 2 | 1  | 2  | 6  | 3.117 | 1.049 | 1.624 | 1.401 | 13.02  | 4.52  | 4  | 6  | 376  | 40.9  | 8.22  |
| Q9BST9 | RhoteKin<br>OS=Homo sapiens<br>GN=RTKN<br>PE=1 SV=2 - [RTKN_HUMAN]                                                                  | 4.09  | 1 | 2  | 2  | 2  | 1.299 | 1.025 | 1.191 | 1.401 | 5.76   | 4.09  | 2  | 2  | 563  | 62.6  | 7.44  |
| Q7RTV0 | PHD finger-like domain-containing protein 5A<br>OS=Homo sapiens<br>GN=PHF5A<br>PE=1 SV=1 - [PHF5A_HUMAN]                            | 21.82 | 1 | 3  | 3  | 9  | 1.122 | 1.727 | 1.072 | 1.401 | 10.34  | 21.82 | 6  | 9  | 110  | 12.4  | 8.41  |
| Q15057 | Arf-GAP with coiled-coil, ANK repeat and PH domain-containing protein 2<br>OS=Homo sapiens<br>GN=ACAP2<br>PE=1 SV=3 - [ACAP2_HUMAN] | 11.83 | 1 | 10 | 10 | 30 | 1.280 | 1.081 | 0.950 | 1.401 | 80.27  | 11.83 | 14 | 30 | 778  | 88.0  | 6.80  |
| Q81ZA0 | Dyslexia-associated protein KIAA0319-like protein<br>OS=Homo sapiens<br>GN=KIAA0319L<br>PE=1 SV=2 - [K319L_HUMAN]                   | 3.91  | 1 | 3  | 3  | 10 | 1.390 | 1.092 | 1.127 | 1.402 | 16.54  | 3.91  | 6  | 10 | 1049 | 115.6 | 6.05  |
| Q9C0A1 | Zinc finger homeobox protein 2<br>OS=Homo sapiens<br>GN=ZFX2<br>PE=2 SV=3 - [ZFX2_HUMAN]                                            | 0.78  | 1 | 1  | 1  | 2  | 0.722 | 3.910 | 3.071 | 1.402 | 0.00   | 0.78  | 1  | 2  | 2572 | 274.0 | 5.88  |
| Q81XK0 | Polyhomeotic-like protein 2<br>OS=Homo sapiens<br>GN=PHC2<br>PE=1 SV=1 - [PHC2_HUMAN]                                               | 3.03  | 1 | 3  | 3  | 6  | 1.006 | 1.308 | 0.919 | 1.402 | 11.68  | 3.03  | 4  | 6  | 858  | 90.7  | 8.69  |

|        |                                                                                                                                                 |       |   |    |    |    |       |       |       |       |        |       |    |    |      |       |      |  |
|--------|-------------------------------------------------------------------------------------------------------------------------------------------------|-------|---|----|----|----|-------|-------|-------|-------|--------|-------|----|----|------|-------|------|--|
|        | Probable ATP-dependent RNA helicase DDX31                                                                                                       |       |   |    |    |    |       |       |       |       |        |       |    |    |      |       |      |  |
| Q9H8H2 | OS=Homo sapiens<br>GN=DDX31<br>PE=1 SV=2 - [DDX31_HUMAN<br>Rhomboid-related protein 3 OS=Homo sapiens<br>GN=RHBDL3<br>PE=2 SV=1 - [RHBL3_HUMAN] | 7.17  | 1 | 6  | 6  | 12 | 0.760 | 1.011 | 0.922 | 1.403 | 18.66  | 7.17  | 10 | 12 | 851  | 94.0  | 9.99 |  |
| P58872 | DNA-directed RNA polymerase III subunit RPC3 OS=Homo sapiens<br>GN=POLR3C<br>PE=1 SV=1 - [RPC3_HUMAN]                                           | 1.98  | 1 | 1  | 1  | 1  | 0.668 | 1.118 | 1.317 | 1.403 | 0.00   | 1.98  | 1  | 1  | 404  | 45.2  | 7.61 |  |
| Q9BUI4 | Transcriptional repressor p66-alpha OS=Homo sapiens<br>GN=GATAD2A<br>PE=1 SV=1 - [P66A_HUMAN]                                                   | 7.87  | 1 | 3  | 3  | 5  | 0.948 | 1.523 | 1.349 | 1.403 | 10.83  | 7.87  | 4  | 5  | 534  | 60.6  | 7.31 |  |
| Q86YP4 | Protein CFAP46 OS=Homo sapiens<br>GN=CFAP46<br>PE=2 SV=3 - [CFA46_HUMAN]                                                                        | 21.01 | 1 | 9  | 10 | 35 | 1.008 | 1.090 | 0.975 | 1.403 | 65.61  | 21.01 | 17 | 35 | 633  | 68.0  | 9.94 |  |
| Q81YW2 | U3 small nucleolar RNA-associated protein 18 homolog OS=Homo sapiens<br>GN=UTP18<br>PE=1 SV=3 - [UTP18_HUMAN]                                   | 0.66  | 1 | 1  | 1  | 1  | 1.172 | 2.357 | 1.836 | 1.403 | 0.00   | 0.66  | 1  | 1  | 2715 | 303.3 | 7.36 |  |
| Q9Y5J1 | Arf-GAP with SH3 domain, ANK repeat and PH domain-containing protein 1 OS=Homo sapiens<br>GN=ASAP1<br>PE=1 SV=4 - [ASAP1_HUMAN]                 | 7.37  | 1 | 3  | 3  | 13 | 0.726 | 0.836 | 0.870 | 1.403 | 24.64  | 7.37  | 5  | 13 | 556  | 62.0  | 8.76 |  |
| Q9ULH1 | Serine/threonine-protein kinase SIK2 OS=Homo sapiens<br>GN=SIK2 PE=1 SV=1 - [SIK2_HUMAN]                                                        | 25.16 | 1 | 21 | 24 | 88 | 1.824 | 0.618 | 0.961 | 1.404 | 242.30 | 25.16 | 36 | 88 | 1129 | 125.4 | 7.31 |  |
| Q9H0K1 |                                                                                                                                                 | 3.02  | 1 | 3  | 3  | 5  | 0.864 | 1.727 | 1.297 | 1.404 | 14.81  | 3.02  | 4  | 5  | 926  | 103.8 | 6.02 |  |



|        |                                                                                                                                                                                                                                                            |       |   |   |    |    |       |       |       |       |       |       |    |    |      |       |      |
|--------|------------------------------------------------------------------------------------------------------------------------------------------------------------------------------------------------------------------------------------------------------------|-------|---|---|----|----|-------|-------|-------|-------|-------|-------|----|----|------|-------|------|
| Q96CM3 | RNA<br>pseudouridylation<br>synthase<br>domain-<br>containing<br>protein 4<br>OS=Homo<br>sapiens<br>GN=RPUSD4<br>PE=2 SV=1 -<br>[RUSD4_HUMAN<br>]<br>mRNA-<br>decapping<br>enzyme 1B<br>OS=Homo<br>sapiens<br>GN=DCP1B<br>PE=1 SV=2 -<br>[DCP1B_HUMAN<br>] | 2.92  | 1 | 1 | 1  | 1  | 0.759 | 0.981 | 1.447 | 1.404 | 2.09  | 2.92  | 1  | 1  | 377  | 42.2  | 9.88 |
| Q81ZD4 | OS=Homo<br>sapiens<br>GN=DCP1B<br>PE=1 SV=2 -<br>[DCP1B_HUMAN<br>]                                                                                                                                                                                         | 6.65  | 1 | 3 | 3  | 10 | 1.167 | 1.369 | 0.959 | 1.404 | 24.30 | 6.65  | 5  | 10 | 617  | 67.7  | 8.56 |
| Q15165 | Serum<br>paraoxonase/a<br>rylesterase 2<br>OS=Homo<br>sapiens<br>GN=PON2<br>PE=1 SV=3 -<br>[PON2_HUMAN]                                                                                                                                                    | 22.60 | 1 | 5 | 5  | 9  | 0.803 | 0.853 | 0.759 | 1.406 | 21.54 | 22.60 | 8  | 9  | 354  | 39.4  | 5.60 |
| P48051 | G protein-<br>activated<br>inward rectifier<br>potassium<br>channel 2<br>OS=Homo<br>sapiens<br>GN=KCNJ6<br>PE=1 SV=1 -<br>[KCNJ6_HUMAN<br>]                                                                                                                | 1.89  | 1 | 1 | 1  | 2  | 5.773 | 0.923 | 1.257 | 1.406 | 1.81  | 1.89  | 2  | 2  | 423  | 48.4  | 5.38 |
| Q9NZJ6 | Hexaprenyldihy<br>droxybenzoate<br>methyltransfer<br>ase,<br>mitochondrial<br>OS=Homo<br>sapiens<br>GN=COQ3<br>PE=1 SV=3 -<br>[COQ3_HUMAN<br>]                                                                                                             | 6.50  | 1 | 2 | 2  | 7  | 1.335 | 1.439 | 2.453 | 1.406 | 3.19  | 6.50  | 2  | 7  | 369  | 41.0  | 7.42 |
| Q9Y613 | FH1/FH2<br>domain-<br>containing<br>protein 1<br>OS=Homo<br>sapiens<br>GN=FHOD1<br>PE=1 SV=3 -<br>[FHOD1_HUMA<br>N]                                                                                                                                        | 6.10  | 1 | 7 | 7  | 12 | 1.035 | 0.892 | 0.783 | 1.407 | 37.59 | 6.10  | 10 | 12 | 1164 | 126.5 | 6.39 |
| Q9P0U4 | CXXC-type zinc<br>finger protein<br>1 OS=Homo<br>sapiens<br>GN=CXXC1<br>PE=1 SV=2 -<br>[CXXC1_HUMAN<br>]                                                                                                                                                   | 3.51  | 1 | 2 | 2  | 12 | 0.923 | 1.411 | 0.989 | 1.407 | 32.28 | 3.51  | 4  | 12 | 656  | 75.7  | 8.24 |
| Q9NQG5 | Regulation of<br>nuclear pre-<br>mRNA domain-<br>containing<br>protein 1B<br>OS=Homo<br>sapiens<br>GN=RPRD1B<br>PE=1 SV=1 -<br>[RPR1B_HUMAN<br>]                                                                                                           | 31.90 | 3 | 8 | 10 | 33 | 1.189 | 1.346 | 0.850 | 1.407 | 85.63 | 31.90 | 15 | 33 | 326  | 36.9  | 5.97 |

|        |                                                                                                                          |       |   |    |    |     |       |       |       |       |        |       |    |     |      |       |      |
|--------|--------------------------------------------------------------------------------------------------------------------------|-------|---|----|----|-----|-------|-------|-------|-------|--------|-------|----|-----|------|-------|------|
| Q99496 | E3 ubiquitin-protein ligase<br>RING2<br>OS=Homo sapiens<br>GN=RNF2<br>PE=1 SV=1 - [RING2_HUMAN]                          | 6.25  | 1 | 2  | 2  | 5   | 0.907 | 1.128 | 0.890 | 1.407 | 11.35  | 6.25  | 4  | 5   | 336  | 37.6  | 6.84 |
| Q9H5X1 | MIP18 family protein<br>FAM96A<br>OS=Homo sapiens<br>GN=FAM96A<br>PE=1 SV=1 - [FA96A_HUMAN]                              | 12.50 | 1 | 2  | 2  | 10  | 1.165 | 0.918 | 0.878 | 1.408 | 21.42  | 12.50 | 4  | 10  | 160  | 18.3  | 4.88 |
| Q8NFI7 | Methylcytosine dioxygenase<br>TET1<br>OS=Homo sapiens<br>GN=TET1<br>PE=1 SV=2 - [TET1_HUMAN]                             | 1.54  | 1 | 2  | 2  | 4   | 0.934 | 1.050 | 0.955 | 1.408 | 2.74   | 1.54  | 2  | 4   | 2136 | 235.2 | 8.24 |
| Q8IX05 | CD302 antigen<br>OS=Homo sapiens<br>GN=CD302<br>PE=1 SV=1 - [CD302_HUMAN]                                                | 11.64 | 1 | 2  | 2  | 3   | 1.078 | 0.589 | 0.410 | 1.409 | 6.58   | 11.64 | 2  | 3   | 232  | 26.2  | 4.61 |
| Q6Y288 | Beta-1,3-glucosyltransferase<br>OS=Homo sapiens<br>GN=B3GALTL<br>PE=1 SV=2 - [B3GLT_HUMAN]                               | 3.01  | 1 | 1  | 2  | 3   | 1.229 | 1.690 | 1.876 | 1.410 | 4.67   | 3.01  | 3  | 3   | 498  | 56.5  | 7.50 |
| Q5VZL5 | Zinc finger MYM-type protein 4<br>OS=Homo sapiens<br>GN=ZMYM4<br>PE=1 SV=1 - [ZMYM4_HUMAN]                               | 5.36  | 1 | 4  | 4  | 5   | 1.598 | 1.471 | 1.237 | 1.410 | 5.44   | 5.36  | 4  | 5   | 1548 | 172.7 | 6.84 |
| Q8N5G2 | Macollin<br>OS=Homo sapiens<br>GN=TMEM57<br>PE=1 SV=1 - [MACOI_HUMAN]                                                    | 5.57  | 1 | 3  | 4  | 17  | 1.077 | 1.030 | 1.437 | 1.410 | 36.23  | 5.57  | 7  | 17  | 664  | 76.1  | 9.07 |
| O95425 | Supervillin<br>OS=Homo sapiens<br>GN=SVIL PE=1 SV=2 - [SVIL_HUMAN]                                                       | 26.33 | 1 | 48 | 48 | 160 | 1.491 | 2.158 | 1.444 | 1.410 | 430.91 | 26.33 | 74 | 160 | 2214 | 247.6 | 6.98 |
| O95139 | NADH dehydrogenase [ubiquinone] 1 beta subcomplex subunit 6<br>OS=Homo sapiens<br>GN=NDUFB6<br>PE=1 SV=3 - [NDUB6_HUMAN] | 39.84 | 1 | 6  | 6  | 17  | 1.253 | 1.167 | 0.963 | 1.411 | 30.67  | 39.84 | 8  | 17  | 128  | 15.5  | 9.63 |

|        |                                                                                                                         |       |   |   |    |     |       |       |       |       |        |       |    |     |      |       |       |
|--------|-------------------------------------------------------------------------------------------------------------------------|-------|---|---|----|-----|-------|-------|-------|-------|--------|-------|----|-----|------|-------|-------|
| Q8IZQ5 | Selenoprotein H OS=Homo sapiens<br>GN=SELH PE=1 SV=2 - [SELH_HUMAN]                                                     | 15.57 | 1 | 2 | 2  | 5   | 1.717 | 0.990 | 0.686 | 1.411 | 12.26  | 15.57 | 3  | 5   | 122  | 13.4  | 9.74  |
| Q9H0C8 | Integrin-linked kinase-associated serine/threonine phosphatase 2C OS=Homo sapiens<br>GN=ILKAP PE=1 SV=1 - [ILKAP_HUMAN] | 16.33 | 1 | 6 | 6  | 14  | 1.277 | 1.083 | 0.702 | 1.411 | 35.70  | 16.33 | 8  | 14  | 392  | 42.9  | 7.09  |
| P23527 | Histone H2B type 1-O OS=Homo sapiens<br>GN=HIST1H2B O PE=1 SV=3 - [H2B1O_HUMAN]                                         | 67.46 | 7 | 2 | 13 | 353 | 1.661 | 1.725 | 1.031 | 1.412 | 745.67 | 67.46 | 23 | 353 | 126  | 13.9  | 10.32 |
| Q8N9N7 | Leucine-rich repeat-containing protein 57 OS=Homo sapiens<br>GN=LRRC57 PE=1 SV=1 - [LRC57_HUMAN]                        | 17.99 | 1 | 5 | 5  | 9   | 1.041 | 1.137 | 1.127 | 1.412 | 19.18  | 17.99 | 7  | 9   | 239  | 26.7  | 8.43  |
| Q9BYX2 | TBC1 domain family member 2A OS=Homo sapiens<br>GN=TBC1D2 PE=1 SV=3 - [TBD2A_HUMAN]                                     | 8.84  | 2 | 6 | 8  | 31  | 1.748 | 0.706 | 1.064 | 1.412 | 74.75  | 8.84  | 11 | 31  | 928  | 105.3 | 6.58  |
| Q16875 | 6-phosphofructo-2-kinase/fructose-2,6-bisphosphatase 3 OS=Homo sapiens<br>GN=PFKFB3 PE=1 SV=1 - [F263_HUMAN]            | 1.92  | 1 | 1 | 1  | 1   | 1.182 | 1.056 | 1.539 | 1.413 | 2.13   | 1.92  | 1  | 1   | 520  | 59.6  | 8.21  |
| Q9H5Q4 | Dimethyladenosine transferase 2, mitochondrial OS=Homo sapiens<br>GN=TFB2M PE=1 SV=1 - [TFB2M_HUMAN]                    | 5.81  | 1 | 2 | 2  | 6   | 0.686 | 0.938 | 1.009 | 1.413 | 15.93  | 5.81  | 2  | 6   | 396  | 45.3  | 9.19  |
| Q5TCY1 | Tau-tubulin kinase 1 OS=Homo sapiens<br>GN=TTBK1 PE=1 SV=2 - [TTBK1_HUMAN]                                              | 0.98  | 1 | 1 | 1  | 2   | 0.658 | 0.724 | 1.331 | 1.413 | 0.00   | 0.98  | 1  | 2   | 1321 | 142.6 | 5.60  |

|        |                                                                                                                                       |       |   |    |    |    |       |       |       |       |        |       |    |    |     |       |       |
|--------|---------------------------------------------------------------------------------------------------------------------------------------|-------|---|----|----|----|-------|-------|-------|-------|--------|-------|----|----|-----|-------|-------|
| Q9H6K4 | Optic atrophy<br>3 protein<br>OS=Homo<br>sapiens<br>GN=OPA3<br>PE=1 SV=1 -<br>[OPA3_HUMAN]                                            | 9.50  | 1 | 2  | 2  | 4  | 1.515 | 0.888 | 1.015 | 1.413 | 2.14   | 9.50  | 3  | 4  | 179 | 20.0  | 8.91  |
| Q52LJ0 | Protein<br>FAM98B<br>OS=Homo<br>sapiens<br>GN=FAM98B<br>PE=1 SV=1 -<br>[FA98B_HUMAN]                                                  | 31.21 | 1 | 7  | 10 | 33 | 1.161 | 1.346 | 1.258 | 1.414 | 64.40  | 31.21 | 14 | 33 | 330 | 37.2  | 6.29  |
| Q9BXP5 | Serrate RNA<br>effector<br>molecule<br>homolog<br>OS=Homo<br>sapiens<br>GN=SRRT<br>PE=1 SV=1 -<br>[SRRT_HUMAN]                        | 20.32 | 2 | 20 | 20 | 77 | 1.199 | 1.220 | 1.072 | 1.414 | 167.42 | 20.32 | 27 | 77 | 876 | 100.6 | 5.96  |
| O00488 | Zinc finger<br>protein 593<br>OS=Homo<br>sapiens<br>GN=ZNF593<br>PE=1 SV=2 -<br>[ZNF593_HUMAN]                                        | 10.45 | 1 | 1  | 1  | 4  | 0.294 | 0.840 | 0.585 | 1.414 | 18.31  | 10.45 | 1  | 4  | 134 | 15.2  | 9.82  |
| Q8N163 | Cell cycle and<br>apoptosis<br>regulator<br>protein 2<br>OS=Homo<br>sapiens<br>GN=CCAR2<br>PE=1 SV=2 -<br>[CCAR2_HUMAN]               | 13.98 | 1 | 11 | 13 | 25 | 1.576 | 1.208 | 0.973 | 1.415 | 52.93  | 13.98 | 20 | 25 | 923 | 102.8 | 5.22  |
| Q05048 | Cleavage<br>stimulation<br>factor subunit<br>1 OS=Homo<br>sapiens<br>GN=CSTF1<br>PE=1 SV=1 -<br>[CSTF1_HUMAN]                         | 11.37 | 1 | 3  | 3  | 12 | 0.721 | 1.317 | 1.366 | 1.415 | 40.77  | 11.37 | 6  | 12 | 431 | 48.3  | 6.58  |
| O95478 | Ribosome<br>biogenesis<br>protein NSA2<br>homolog<br>OS=Homo<br>sapiens<br>GN=NSA2<br>PE=1 SV=1 -<br>[NSA2_HUMAN]                     | 10.77 | 1 | 3  | 3  | 6  | 0.616 | 0.730 | 0.666 | 1.416 | 11.33  | 10.77 | 3  | 6  | 260 | 30.0  | 10.27 |
| Q15020 | Squamous cell<br>carcinoma<br>antigen<br>recognized by<br>T-cells 3<br>OS=Homo<br>sapiens<br>GN=SART3<br>PE=1 SV=1 -<br>[SART3_HUMAN] | 16.10 | 1 | 13 | 14 | 42 | 0.975 | 1.137 | 0.858 | 1.416 | 90.80  | 16.10 | 21 | 42 | 963 | 109.9 | 5.57  |

|        |                                                                                                           |       |   |    |    |     |       |       |       |       |        |       |    |     |      |       |       |
|--------|-----------------------------------------------------------------------------------------------------------|-------|---|----|----|-----|-------|-------|-------|-------|--------|-------|----|-----|------|-------|-------|
| Q9Y383 | Putative RNA-binding protein<br>Luc7-like 2<br>OS=Homo sapiens<br>GN=LUC7L2<br>PE=1 SV=2 - [LC7L2_HUMAN]  | 26.79 | 1 | 6  | 10 | 67  | 1.052 | 1.300 | 1.102 | 1.418 | 185.29 | 26.79 | 18 | 67  | 392  | 46.5  | 10.01 |
| Q6UW63 | KDEL motif-containing protein 1<br>OS=Homo sapiens<br>GN=KDEL1<br>PE=1 SV=1 - [KDEL1_HUMAN]               | 7.77  | 1 | 3  | 4  | 7   | 1.934 | 1.067 | 1.458 | 1.419 | 10.99  | 7.77  | 5  | 7   | 502  | 58.0  | 7.71  |
| Q6PL18 | ATPase family AAA domain-containing protein 2<br>OS=Homo sapiens<br>GN=ATAD2<br>PE=1 SV=1 - [ATAD2_HUMAN] | 2.23  | 1 | 2  | 2  | 4   | 1.078 | 1.351 | 0.938 | 1.419 | 8.00   | 2.23  | 2  | 4   | 1390 | 158.5 | 6.32  |
| Q13228 | Selenium-binding protein 1<br>OS=Homo sapiens<br>GN=SELENBP1<br>PE=1 SV=2 - [SBP1_HUMAN]                  | 43.22 | 1 | 18 | 18 | 64  | 1.823 | 1.254 | 0.923 | 1.419 | 173.28 | 43.22 | 29 | 64  | 472  | 52.4  | 6.37  |
| Q8TAV0 | Protein FAM76A<br>OS=Homo sapiens<br>GN=FAM76A<br>PE=2 SV=1 - [FA76A_HUMAN]                               | 2.28  | 1 | 1  | 1  | 1   | 1.698 | 1.364 | 1.179 | 1.420 | 2.72   | 2.28  | 1  | 1   | 307  | 35.0  | 9.19  |
| Q9BUP3 | Oxidoreductase HTATIP2<br>OS=Homo sapiens<br>GN=HTATIP2<br>PE=1 SV=2 - [HTAI2_HUMAN]                      | 42.56 | 1 | 11 | 11 | 18  | 1.371 | 0.825 | 0.723 | 1.421 | 38.09  | 42.56 | 15 | 18  | 242  | 27.0  | 8.38  |
| P35637 | RNA-binding protein FUS<br>OS=Homo sapiens<br>GN=FUS PE=1 SV=1 - [FUS_HUMAN]                              | 20.15 | 1 | 9  | 12 | 87  | 1.204 | 0.908 | 0.858 | 1.422 | 193.98 | 20.15 | 19 | 87  | 526  | 53.4  | 9.36  |
| Q13263 | Transcription intermediary factor 1-beta<br>OS=Homo sapiens<br>GN=TRIM28<br>PE=1 SV=5 - [TIF1B_HUMAN]     | 23.35 | 1 | 21 | 21 | 182 | 1.168 | 1.106 | 0.870 | 1.422 | 455.13 | 23.35 | 38 | 182 | 835  | 88.5  | 5.77  |
| Q6IC98 | GRAM domain-containing protein 4<br>OS=Homo sapiens<br>GN=GRAMD4<br>PE=1 SV=1 - [GRAM4_HUMAN]             | 1.73  | 1 | 1  | 1  | 1   | 2.271 | 1.141 | 0.279 | 1.422 | 2.39   | 1.73  | 1  | 1   | 578  | 66.4  | 8.84  |

|        |                                                                                                             |       |   |    |    |     |       |       |       |       |        |       |    |     |      |       |       |
|--------|-------------------------------------------------------------------------------------------------------------|-------|---|----|----|-----|-------|-------|-------|-------|--------|-------|----|-----|------|-------|-------|
| Q8ND76 | Cydin-Y<br>OS=Homo sapiens<br>GN=CCNY<br>PE=1 SV=2 - [CCNY_HUMAN]                                           | 4.99  | 1 | 1  | 2  | 4   | 3.512 | 2.306 | 1.373 | 1.422 | 9.93   | 4.99  | 3  | 4   | 341  | 39.3  | 7.20  |
| Q9Y2I1 | Nischarin<br>OS=Homo sapiens<br>GN=NISCH<br>PE=1 SV=3 - [NISCH_HUMAN]                                       | 1.20  | 1 | 2  | 2  | 5   | 1.280 | 1.153 | 0.983 | 1.423 | 10.99  | 1.20  | 2  | 5   | 1504 | 166.5 | 5.14  |
| Q9NQ55 | Suppressor of SWI4 1 homolog<br>OS=Homo sapiens<br>GN=PPAN<br>PE=1 SV=1 - [SSF1_HUMAN]                      | 3.38  | 1 | 2  | 2  | 5   | 0.988 | 0.931 | 0.659 | 1.424 | 11.93  | 3.38  | 3  | 5   | 473  | 53.2  | 10.13 |
| Q96GC9 | Vacuole membrane protein 1<br>OS=Homo sapiens<br>GN=VMP1<br>PE=1 SV=1 - [VMP1_HUMAN]                        | 8.87  | 1 | 1  | 2  | 4   |       |       | 0.525 | 1.424 | 11.29  | 8.87  | 2  | 4   | 406  | 46.2  | 6.95  |
| O14578 | Citron Rho-interacting kinase<br>OS=Homo sapiens<br>GN=CIT PE=1 SV=2 - [CTRO_HUMAN]                         | 4.14  | 1 | 5  | 8  | 24  | 0.933 | 1.489 | 1.522 | 1.424 | 51.98  | 4.14  | 9  | 24  | 2027 | 231.3 | 6.57  |
| O14939 | Phospholipase D2<br>OS=Homo sapiens<br>GN=PLD2 PE=1 SV=2 - [PLD2_HUMAN]                                     | 5.04  | 1 | 4  | 4  | 7   | 1.581 | 1.208 | 1.280 | 1.425 | 19.19  | 5.04  | 5  | 7   | 933  | 105.9 | 7.64  |
| Q86U38 | Nucleolar protein 9<br>OS=Homo sapiens<br>GN=NOP9<br>PE=1 SV=1 - [NOP9_HUMAN]                               | 5.35  | 1 | 2  | 3  | 9   | 0.791 | 0.519 | 0.695 | 1.425 | 26.00  | 5.35  | 4  | 9   | 636  | 69.4  | 7.28  |
| P07910 | Heterogeneous nuclear ribonucleoproteins C1/C2<br>OS=Homo sapiens<br>GN=HNRNPC<br>PE=1 SV=4 - [HNRPC_HUMAN] | 36.27 | 7 | 11 | 17 | 159 | 1.275 | 1.441 | 1.009 | 1.425 | 376.80 | 36.27 | 27 | 159 | 306  | 33.6  | 5.08  |
| A6NCK2 | Tripartite motif-containing protein 43B<br>OS=Homo sapiens<br>GN=TRIM43B<br>PE=3 SV=3 - [TR43B_HUMAN]       | 3.36  | 1 | 1  | 1  | 1   | 1.247 | 2.081 | 1.446 | 1.426 | 2.96   | 3.36  | 1  | 1   | 446  | 52.3  | 7.85  |

|        |                                                                                                      |       |   |    |    |    |       |       |       |       |        |       |    |    |     |      |       |
|--------|------------------------------------------------------------------------------------------------------|-------|---|----|----|----|-------|-------|-------|-------|--------|-------|----|----|-----|------|-------|
| Q9BRP8 | Partner of Y14 and mago<br>OS=Homo sapiens<br>GN=WIBG<br>PE=1 SV=1 - [WIBG_HUMAN]                    | 62.25 | 1 | 9  | 9  | 21 | 1.257 | 1.109 | 1.157 | 1.426 | 57.92  | 62.25 | 11 | 21 | 204 | 22.6 | 9.45  |
| Q14914 | Prostaglandin reductase 1<br>OS=Homo sapiens<br>GN=PTGR1<br>PE=1 SV=2 - [PTGR1_HUMAN]                | 44.38 | 1 | 17 | 17 | 92 | 2.439 | 0.536 | 0.686 | 1.426 | 233.60 | 44.38 | 28 | 92 | 329 | 35.8 | 8.29  |
| Q9Y291 | 28S ribosomal protein S33, mitochondrial<br>OS=Homo sapiens<br>GN=MRPS33<br>PE=1 SV=1 - [RT33_HUMAN] | 11.32 | 1 | 1  | 1  | 2  | 0.767 | 1.612 | 1.284 | 1.427 | 2.80   | 11.32 | 2  | 2  | 106 | 12.6 | 10.11 |
| P09234 | U1 small nuclear ribonucleoprotein C<br>OS=Homo sapiens<br>GN=SNRPC<br>PE=1 SV=1 - [SNRPC_HUMAN]     | 5.66  | 1 | 1  | 1  | 4  | 1.107 | 1.251 | 0.988 | 1.427 | 12.83  | 5.66  | 2  | 4  | 159 | 17.4 | 9.67  |
| Q9UBR2 | Cathepsin Z<br>OS=Homo sapiens<br>GN=CTSZ<br>PE=1 SV=1 - [CATZ_HUMAN]                                | 20.13 | 1 | 6  | 6  | 30 | 1.278 | 1.206 | 1.774 | 1.427 | 58.23  | 20.13 | 10 | 30 | 303 | 33.8 | 7.11  |
| Q13077 | TNF receptor-associated factor 1<br>OS=Homo sapiens<br>GN=TRAF1<br>PE=1 SV=1 - [TRAF1_HUMAN]         | 2.64  | 1 | 1  | 1  | 2  | 1.089 | 0.634 | 1.293 | 1.428 | 1.64   | 2.64  | 2  | 2  | 416 | 46.1 | 6.11  |
| Q13835 | Plakophilin-1<br>OS=Homo sapiens<br>GN=PKP1<br>PE=1 SV=2 - [PKP1_HUMAN]                              | 1.74  | 1 | 1  | 1  | 1  | 1.384 | 0.953 | 0.980 | 1.428 | 0.00   | 1.74  | 1  | 1  | 747 | 82.8 | 9.13  |
| Q9H814 | Phosphorylated adapter RNA export protein<br>OS=Homo sapiens<br>GN=PHAX<br>PE=1 SV=1 - [PHAX_HUMAN]  | 7.87  | 1 | 3  | 3  | 6  | 0.999 | 1.242 | 1.130 | 1.430 | 19.06  | 7.87  | 5  | 6  | 394 | 44.4 | 5.40  |
| Q9NQ29 | Putative RNA-binding protein Luc7-like 1<br>OS=Homo sapiens<br>GN=LUC7L<br>PE=1 SV=1 - [LUC7L_HUMAN] | 18.33 | 1 | 2  | 6  | 20 | 1.018 | 1.410 | 0.804 | 1.430 | 58.51  | 18.33 | 9  | 20 | 371 | 43.7 | 9.92  |

|        |                                                                                                                      |       |   |    |    |     |       |       |       |       |        |       |    |     |      |       |      |
|--------|----------------------------------------------------------------------------------------------------------------------|-------|---|----|----|-----|-------|-------|-------|-------|--------|-------|----|-----|------|-------|------|
| Q9BW30 | Tubulin polymerization-promoting protein family member 3<br>OS=Homo sapiens<br>GN=TPPP3<br>PE=1 SV=1 - [TPPP3_HUMAN] | 12.50 | 1 | 2  | 2  | 4   | 1.641 | 9.479 | 1.566 | 1.430 | 8.48   | 12.50 | 3  | 4   | 176  | 19.0  | 9.13 |
| Q12946 | Forkhead box protein F1<br>OS=Homo sapiens<br>GN=FOXF1<br>PE=1 SV=2 - [FOXF1_HUMAN]                                  | 15.57 | 2 | 3  | 3  | 11  | 1.038 | 1.077 | 1.349 | 1.431 | 29.90  | 15.57 | 4  | 11  | 379  | 40.1  | 9.10 |
| O95905 | Protein SGT1<br>OS=Homo sapiens<br>GN=ECD PE=1 SV=1 - [SGT1_HUMAN]                                                   | 1.24  | 1 | 1  | 1  | 2   | 1.187 | 0.974 | 1.172 | 1.431 | 1.64   | 1.24  | 2  | 2   | 644  | 72.7  | 4.87 |
| O94952 | F-box only protein 21<br>OS=Homo sapiens<br>GN=FBXO21<br>PE=2 SV=2 - [FBX21_HUMAN]                                   | 1.27  | 1 | 1  | 1  | 1   | 1.230 | 2.643 | 1.947 | 1.431 | 0.00   | 1.27  | 1  | 1   | 628  | 72.2  | 6.09 |
| P21399 | Cytoplasmic aconitate hydratase<br>OS=Homo sapiens<br>GN=ACO1<br>PE=1 SV=3 - [ACOC_HUMAN]                            | 32.85 | 1 | 27 | 27 | 170 | 2.013 | 1.342 | 1.049 | 1.431 | 429.99 | 32.85 | 43 | 170 | 889  | 98.3  | 6.68 |
| O15381 | Nuclear valosin-containing protein-like<br>OS=Homo sapiens<br>GN=NVL PE=1 SV=1 - [NVL_HUMAN]                         | 1.40  | 1 | 1  | 1  | 2   | 0.939 | 0.963 | 0.646 | 1.432 | 3.33   | 1.40  | 2  | 2   | 856  | 95.0  | 6.48 |
| Q5VV42 | Threonylcarbamoyladenosine tRNA methyltransferase<br>OS=Homo sapiens<br>GN=CDKAL1<br>PE=1 SV=1 - [CDKAL_HUMAN]       | 2.07  | 1 | 1  | 1  | 4   | 0.902 | 0.922 | 0.874 | 1.432 | 9.46   | 2.07  | 2  | 4   | 579  | 65.1  | 7.46 |
| P28065 | Proteasome subunit beta type-9<br>OS=Homo sapiens<br>GN=PSMB9<br>PE=1 SV=2 - [PSB9_HUMAN]                            | 24.66 | 1 | 4  | 4  | 12  | 1.720 | 0.776 | 0.624 | 1.432 | 33.28  | 24.66 | 6  | 12  | 219  | 23.2  | 5.03 |
| Q96AE7 | Tetratricopeptide repeat protein 17<br>OS=Homo sapiens<br>GN=TTC17<br>PE=1 SV=1 - [TTC17_HUMAN]                      | 4.65  | 1 | 5  | 6  | 17  | 1.192 | 0.976 | 0.856 | 1.432 | 40.92  | 4.65  | 8  | 17  | 1141 | 129.5 | 6.58 |



|        |                                                                                                                  |       |   |    |    |    |       |       |       |       |       |       |    |    |      |       |      |
|--------|------------------------------------------------------------------------------------------------------------------|-------|---|----|----|----|-------|-------|-------|-------|-------|-------|----|----|------|-------|------|
| Q8NA47 | Coiled-coil domain-containing protein 63<br>OS=Homo sapiens<br>GN=CCDC63<br>PE=2 SV=1 - [CCD63_HUMAN]            | 1.78  | 1 | 1  | 1  | 2  | 1.950 | 0.799 | 1.501 | 1.432 | 0.00  | 1.78  | 1  | 2  | 563  | 66.2  | 9.06 |
| Q96P56 | Cation channel sperm-associated protein 2<br>OS=Homo sapiens<br>GN=CATSPER2<br>PE=1 SV=2 - [CTSR2_HUMAN]         | 2.26  | 1 | 1  | 1  | 2  | 1.669 | 0.990 | 1.561 | 1.432 | 4.22  | 2.26  | 1  | 2  | 530  | 62.0  | 7.30 |
| Q9NWP1 | ATP-dependent RNA helicase DDX18<br>OS=Homo sapiens<br>GN=DDX18<br>PE=1 SV=2 - [DDX18_HUMAN]                     | 16.12 | 1 | 9  | 9  | 24 | 0.878 | 0.938 | 0.865 | 1.432 | 62.60 | 16.12 | 12 | 24 | 670  | 75.4  | 9.50 |
| Q96FJ2 | Dynein light chain 2, cytoplasmic<br>OS=Homo sapiens<br>GN=DYNLL2<br>PE=1 SV=1 - [DYL2_HUMAN]                    | 20.22 | 1 | 2  | 3  | 16 | 0.972 | 1.649 | 1.450 | 1.433 | 33.93 | 20.22 | 4  | 16 | 89   | 10.3  | 7.37 |
| Q13625 | Apoptosis-stimulating of p53 protein 2<br>OS=Homo sapiens<br>GN=TP53BP2<br>PE=1 SV=2 - [ASPP2_HUMAN]             | 4.88  | 1 | 5  | 5  | 11 | 1.005 | 1.482 | 1.365 | 1.435 | 23.53 | 4.88  | 7  | 11 | 1128 | 125.5 | 6.07 |
| Q9Y624 | Junctional adhesion molecule A<br>OS=Homo sapiens<br>GN=F11R<br>PE=1 SV=1 - [JAM1_HUMAN]                         | 6.02  | 1 | 2  | 2  | 5  | 1.330 | 0.655 | 0.571 | 1.435 | 7.72  | 6.02  | 4  | 5  | 299  | 32.6  | 7.90 |
| Q6NSJ2 | Plectrin homology-like domain family B member 3<br>OS=Homo sapiens<br>GN=PHLDB3<br>PE=2 SV=3 - [PHLB3_HUMAN]     | 6.41  | 1 | 4  | 4  | 6  | 0.885 | 0.884 | 0.871 | 1.436 | 11.76 | 6.41  | 4  | 6  | 640  | 71.9  | 6.57 |
| Q9UDR5 | Alpha-aminoadipic semialdehyde synthase, mitochondrial<br>OS=Homo sapiens<br>GN=AASS<br>PE=1 SV=1 - [AASS_HUMAN] | 12.85 | 1 | 12 | 12 | 34 | 1.177 | 1.127 | 0.677 | 1.437 | 55.10 | 12.85 | 18 | 34 | 926  | 102.1 | 6.64 |

|        |                                                                                                                                                                                                               |       |   |    |    |    |       |       |       |       |       |       |    |    |      |       |      |
|--------|---------------------------------------------------------------------------------------------------------------------------------------------------------------------------------------------------------------|-------|---|----|----|----|-------|-------|-------|-------|-------|-------|----|----|------|-------|------|
| Q9UK61 | Protein<br>FAM208A<br>OS=Homo<br>sapiens<br>GN=FAM208A<br>PE=1 SV=3 -<br>[F208A_HUMAN<br>]<br>Protein O-<br>glucosyltransfer<br>ase 1<br>OS=Homo<br>sapiens<br>GN=POGLUT1<br>PE=1 SV=1 -<br>[PGLT1_HUMAN<br>] | 4.13  | 1 | 7  | 7  | 9  | 0.888 | 1.590 | 0.938 | 1.437 | 11.64 | 4.13  | 9  | 9  | 1670 | 188.9 | 5.80 |
| Q8NBL1 | Lysine-specific<br>demethylase<br>PHF2<br>OS=Homo<br>sapiens<br>GN=PHF2<br>PE=1 SV=4 -<br>[PHF2_HUMAN]                                                                                                        | 26.02 | 1 | 12 | 12 | 41 | 1.149 | 0.869 | 0.926 | 1.437 | 71.48 | 26.02 | 19 | 41 | 392  | 46.2  | 8.72 |
| O75151 | Nuclear factor<br>related to<br>kappa-B-<br>binding protein<br>OS=Homo<br>sapiens<br>GN=NFRKB<br>PE=1 SV=2 -<br>[NFRKB_HUMAN<br>]                                                                             | 5.02  | 1 | 5  | 5  | 9  | 1.065 | 1.503 | 1.087 | 1.437 | 12.14 | 5.02  | 7  | 9  | 1096 | 120.7 | 9.17 |
| Q6P4R8 | Ankyrin repeat<br>domain-<br>containing<br>protein 35<br>OS=Homo<br>sapiens<br>GN=ANKRD35<br>PE=2 SV=2 -<br>[ANR35_HUMAN<br>]                                                                                 | 1.23  | 1 | 1  | 1  | 1  | 1.157 | 1.290 | 1.074 | 1.438 | 0.00  | 1.23  | 1  | 1  | 1299 | 138.9 | 9.25 |
| Q8N283 | Bifunctional<br>polynucleotide<br>phosphatase/ki<br>nase<br>OS=Homo<br>sapiens<br>GN=PNKP<br>PE=1 SV=1 -<br>[PNKP_HUMAN]                                                                                      | 5.29  | 2 | 4  | 5  | 6  | 1.649 | 2.204 | 1.390 | 1.438 | 12.97 | 5.29  | 6  | 6  | 1001 | 109.9 | 6.02 |
| Q96T60 | Phosphatidyli<br>nitol 4-kinase<br>type 2-beta<br>OS=Homo<br>sapiens<br>GN=PI4K2B<br>PE=1 SV=1 -<br>[P4K2B_HUMAN<br>]                                                                                         | 8.06  | 1 | 3  | 4  | 15 | 1.157 | 1.409 | 1.160 | 1.438 | 33.37 | 8.06  | 5  | 15 | 521  | 57.0  | 8.46 |
| Q8TCG2 | Probable<br>ribosome<br>biogenesis<br>protein RLP24<br>OS=Homo<br>sapiens<br>GN=RSL24D1<br>PE=1 SV=1 -<br>[RLP24_HUMAN<br>]                                                                                   | 3.12  | 1 | 1  | 2  | 3  | 1.158 | 0.840 | 1.193 | 1.439 | 0.00  | 3.12  | 2  | 3  | 481  | 54.7  | 5.97 |
| Q9UHA3 |                                                                                                                                                                                                               | 4.29  | 1 | 1  | 1  | 3  | 0.733 | 0.953 | 1.204 | 1.440 | 5.51  | 4.29  | 2  | 3  | 163  | 19.6  | 9.98 |

|        |                                                                                                                                                                                                       |       |   |    |    |     |       |       |       |       |        |       |     |     |      |       |       |
|--------|-------------------------------------------------------------------------------------------------------------------------------------------------------------------------------------------------------|-------|---|----|----|-----|-------|-------|-------|-------|--------|-------|-----|-----|------|-------|-------|
| Q9Y2B9 | cAMP-dependent protein kinase inhibitor<br>gamma<br>OS=Homo sapiens<br>GN=PKIG PE=2<br>SV=1 - [IPKG_HUMAN]<br>Transmembrane protein 209<br>OS=Homo sapiens<br>GN=TMEM209<br>PE=1 SV=2 - [TM209_HUMAN] | 21.05 | 1 | 1  | 1  | 11  | 1.469 | 2.420 | 1.819 | 1.440 | 29.25  | 21.05 | 2   | 11  | 76   | 7.9   | 4.25  |
| Q96SK2 | 40S ribosomal protein S7<br>OS=Homo sapiens<br>GN=RPS7<br>PE=1 SV=1 - [RS7_HUMAN]                                                                                                                     | 5.88  | 1 | 3  | 3  | 6   | 1.293 | 1.134 | 0.856 | 1.441 | 15.75  | 5.88  | 4   | 6   | 561  | 62.9  | 8.63  |
| P62081 | Adenylosuccinate synthetase isozyme 1<br>OS=Homo sapiens<br>GN=ADSSL1<br>PE=2 SV=1 - [PURA1_HUMAN]                                                                                                    | 59.79 | 1 | 12 | 12 | 51  | 1.227 | 1.368 | 1.042 | 1.441 | 100.50 | 59.79 | 16  | 51  | 194  | 22.1  | 10.10 |
| Q8N142 | B-cell CLL/lymphoma 7 protein family member<br>OS=Homo sapiens<br>GN=BCL7B<br>PE=1 SV=1 - [BCL7B_HUMAN]                                                                                               | 7.66  | 1 | 2  | 3  | 10  | 2.185 | 1.166 | 1.283 | 1.441 | 26.27  | 7.66  | 5   | 10  | 457  | 50.2  | 8.59  |
| Q9BQE9 | Eukaryotic translation initiation factor 4E type 2<br>OS=Homo sapiens<br>GN=EIF4E2<br>PE=1 SV=1 - [IF4E2_HUMAN]                                                                                       | 5.45  | 2 | 1  | 2  | 8   | 0.853 | 1.288 | 1.360 | 1.441 | 15.12  | 5.45  | 4   | 8   | 202  | 22.2  | 4.75  |
| O60573 | HAUS augmin-like complex subunit 6<br>OS=Homo sapiens<br>GN=HAUS6<br>PE=1 SV=2 - [HAUS6_HUMAN]                                                                                                        | 6.94  | 1 | 1  | 1  | 2   | 1.032 | 1.260 | 0.890 | 1.442 | 5.60   | 6.94  | 1   | 2   | 245  | 28.3  | 8.88  |
| Q7Z4H7 | Exosome component 10<br>OS=Homo sapiens<br>GN=EXOSC10<br>PE=1 SV=2 - [EXOSX_HUMAN]                                                                                                                    | 3.56  | 1 | 1  | 3  | 3   | 1.192 | 1.190 | 0.870 | 1.442 | 5.75   | 3.56  | 3   | 3   | 955  | 108.6 | 6.47  |
| Q01780 | Talin-2<br>OS=Homo sapiens<br>GN=TLN2 PE=1<br>SV=4 - [TLN2_HUMAN]                                                                                                                                     | 11.07 | 1 | 9  | 9  | 24  | 0.919 | 1.090 | 0.944 | 1.443 | 47.03  | 11.07 | 13  | 24  | 885  | 100.8 | 8.46  |
| Q9Y4G6 |                                                                                                                                                                                                       | 31.39 | 3 | 48 | 70 | 356 | 1.496 | 1.012 | 0.978 | 1.443 | 845.38 | 31.39 | 112 | 356 | 2542 | 271.4 | 5.57  |

|        |                                                                                                                                                                                                                   |       |   |    |    |    |       |       |       |       |        |       |    |    |      |       |      |
|--------|-------------------------------------------------------------------------------------------------------------------------------------------------------------------------------------------------------------------|-------|---|----|----|----|-------|-------|-------|-------|--------|-------|----|----|------|-------|------|
| Q16740 | ATP-dependent Clp protease proteolytic subunit, mitochondrial<br>OS=Homo sapiens<br>GN=CLPP PE=1 SV=1 - [CLPP_HUMAN]<br>Keratin, type II cytoskeletal<br>72 OS=Homo sapiens<br>GN=KRT72 PE=1 SV=2 - [K2C72_HUMAN] | 36.82 | 1 | 8  | 8  | 24 | 1.209 | 1.082 | 1.161 | 1.443 | 69.11  | 36.82 | 12 | 24 | 277  | 30.2  | 8.09 |
| Q14CM4 | Actin filament-associated protein 1-like 2<br>OS=Homo sapiens<br>GN=AFAP112 PE=1 SV=1 - [AF112_HUMAN]                                                                                                             | 18.00 | 2 | 3  | 6  | 12 | 1.192 | 1.940 | 1.717 | 1.444 | 24.31  | 18.00 | 7  | 12 | 511  | 55.8  | 6.89 |
| Q8M4X5 | 5'-3' exoribonuclease 2<br>OS=Homo sapiens<br>GN=AFAP112 PE=1 SV=1 - [AF112_HUMAN]                                                                                                                                | 2.81  | 1 | 2  | 2  | 2  | 0.783 | 0.778 | 1.063 | 1.444 | 7.50   | 2.81  | 2  | 2  | 818  | 91.2  | 5.31 |
| Q9H0D6 | Mitotic checkpoint protein BUB3<br>OS=Homo sapiens<br>GN=XRN2 PE=1 SV=1 - [XRN2_HUMAN]                                                                                                                            | 17.68 | 1 | 15 | 15 | 48 | 1.504 | 1.280 | 0.859 | 1.444 | 130.67 | 17.68 | 24 | 48 | 950  | 108.5 | 7.47 |
| O43684 | CD97 antigen<br>OS=Homo sapiens<br>GN=BUB3 PE=1 SV=1 - [BUB3_HUMAN]                                                                                                                                               | 24.70 | 1 | 7  | 7  | 31 | 0.971 | 0.850 | 0.687 | 1.445 | 82.30  | 24.70 | 13 | 31 | 328  | 37.1  | 6.84 |
| P48960 | Sin3 histone deacetylase corepressor complex component<br>OS=Homo sapiens<br>GN=CD97 PE=1 SV=4 - [CD97_HUMAN]                                                                                                     | 10.54 | 2 | 6  | 6  | 17 | 1.851 | 1.242 | 1.314 | 1.445 | 33.04  | 10.54 | 10 | 17 | 835  | 91.8  | 6.87 |
| Q9H7L9 | RNA-binding protein 26<br>OS=Homo sapiens<br>GN=SDS3 PE=1 SV=2 - [SDS3_HUMAN]                                                                                                                                     | 7.01  | 1 | 2  | 2  | 5  | 0.583 | 2.309 | 1.243 | 1.445 | 14.81  | 7.01  | 2  | 5  | 328  | 38.1  | 5.66 |
| Q5T8P6 | CD97 antigen<br>OS=Homo sapiens<br>GN=RBM26 PE=1 SV=3 - [RBM26_HUMAN]                                                                                                                                             | 6.95  | 1 | 7  | 7  | 11 | 1.156 | 1.173 | 0.986 | 1.446 | 28.30  | 6.95  | 9  | 11 | 1007 | 113.5 | 9.16 |

|        |                                                                                                                                                                                                     |       |   |   |   |    |       |       |       |       |       |       |   |    |     |      |      |
|--------|-----------------------------------------------------------------------------------------------------------------------------------------------------------------------------------------------------|-------|---|---|---|----|-------|-------|-------|-------|-------|-------|---|----|-----|------|------|
| Q81W45 | ATP-dependent (S)-NAD(P)H-hydratase<br>dehydratase<br>OS=Homo sapiens<br>GN=CARKD<br>PE=1 SV=1 - [NNRD_HUMAN]<br>Collectin-12<br>OS=Homo sapiens                                                    | 23.05 | 1 | 6 | 6 | 20 | 1.482 | 1.209 | 1.241 | 1.446 | 47.87 | 23.05 | 9 | 20 | 347 | 36.6 | 8.06 |
| Q5KU26 | GN=COLEC12<br>PE=1 SV=3 - [COL12_HUMAN]<br>60S ribosome subunit<br>biogenesis<br>protein NIP7<br>homolog<br>OS=Homo sapiens<br>GN=NIP7 PE=1 SV=1 - [NIP7_HUMAN]                                     | 11.05 | 1 | 6 | 6 | 9  | 0.918 | 1.440 | 1.267 | 1.446 | 16.38 | 11.05 | 9 | 9  | 742 | 81.5 | 5.69 |
| Q9Y221 | OS=Homo sapiens<br>GN=NIP7 PE=1 SV=1 - [NIP7_HUMAN]                                                                                                                                                 | 7.78  | 1 | 1 | 1 | 2  | 0.912 | 1.001 | 0.688 | 1.446 | 0.00  | 7.78  | 1 | 2  | 180 | 20.4 | 8.51 |
| Q14691 | DNA replication complex GINS<br>protein PSF1<br>OS=Homo sapiens<br>GN=GINS1<br>PE=1 SV=1 - [PSF1_HUMAN]                                                                                             | 3.57  | 1 | 1 | 1 | 1  | 0.702 | 1.048 | 1.781 | 1.446 | 3.19  | 3.57  | 1 | 1  | 196 | 23.0 | 7.39 |
| P35250 | Replication factor C<br>subunit 2<br>OS=Homo sapiens<br>GN=RFC2<br>PE=1 SV=3 - [RFC2_HUMAN]<br>Cleavage stimulation<br>factor subunit 3<br>OS=Homo sapiens<br>GN=CSTF3<br>PE=1 SV=1 - [CSTF3_HUMAN] | 9.89  | 1 | 3 | 3 | 4  | 1.149 | 1.572 | 1.146 | 1.446 | 7.76  | 9.89  | 4 | 4  | 354 | 39.1 | 6.44 |
| Q12996 | HIV Tat-specific<br>factor 1<br>OS=Homo sapiens<br>GN=HTATSF1<br>PE=1 SV=1 - [HTSF1_HUMAN]                                                                                                          | 4.32  | 1 | 2 | 3 | 4  | 1.236 | 1.750 | 1.276 | 1.447 | 14.16 | 4.32  | 4 | 4  | 717 | 82.9 | 8.12 |
| O43719 | Exosome complex component<br>RRP4<br>OS=Homo sapiens<br>GN=EXOSC2<br>PE=1 SV=2 - [EXOS2_HUMAN]                                                                                                      | 8.87  | 1 | 6 | 6 | 14 | 1.129 | 1.043 | 0.914 | 1.447 | 32.20 | 8.87  | 7 | 14 | 755 | 85.8 | 4.40 |
| Q13868 | OS=Homo sapiens<br>GN=EXOSC2<br>PE=1 SV=2 - [EXOS2_HUMAN]                                                                                                                                           | 5.80  | 1 | 1 | 1 | 1  | 0.966 | 1.813 | 2.341 | 1.448 | 3.82  | 5.80  | 1 | 1  | 293 | 32.8 | 7.50 |

|        |                                                                                                                                                                  |       |   |    |    |    |       |       |       |       |        |       |    |    |      |       |      |
|--------|------------------------------------------------------------------------------------------------------------------------------------------------------------------|-------|---|----|----|----|-------|-------|-------|-------|--------|-------|----|----|------|-------|------|
| Q15262 | Receptor-type tyrosine-protein phosphatase kappa<br>OS=Homo sapiens<br>GN=PTPRK<br>PE=1 SV=2 - [PTPRK_HUMAN]<br>Caspase recruitment domain-containing protein 16 | 11.61 | 1 | 11 | 13 | 37 | 1.454 | 0.972 | 1.129 | 1.448 | 92.43  | 11.61 | 19 | 37 | 1439 | 162.0 | 5.90 |
| Q5EG05 | OS=Homo sapiens<br>GN=CARD16<br>PE=1 SV=1 - [CARD16_HUMAN]<br>Delta-aminolevulinic acid dehydratase                                                              | 13.20 | 1 | 1  | 3  | 10 | 0.766 | 0.521 | 0.449 | 1.449 | 20.55  | 13.20 | 6  | 10 | 197  | 22.6  | 8.44 |
| P13716 | OS=Homo sapiens<br>GN=ALAD PE=1 SV=1 - [HEM2_HUMAN]<br>Pyruvate dehydrogenase protein X component, mitochondrial                                                 | 29.70 | 1 | 8  | 8  | 42 | 1.730 | 0.874 | 0.999 | 1.449 | 130.57 | 29.70 | 14 | 42 | 330  | 36.3  | 6.79 |
| O00330 | OS=Homo sapiens<br>GN=PDHX<br>PE=1 SV=3 - [ODPX_HUMAN]<br>Ubiquitin-1                                                                                            | 18.76 | 1 | 8  | 9  | 37 | 1.058 | 0.979 | 0.952 | 1.450 | 85.61  | 18.76 | 14 | 37 | 501  | 54.1  | 8.66 |
| Q9NPG3 | OS=Homo sapiens<br>GN=UBN1<br>PE=1 SV=2 - [UBN1_HUMAN]<br>Uncharacterized protein ZMYM6NB                                                                        | 1.94  | 1 | 2  | 2  | 3  | 0.944 | 1.408 | 1.013 | 1.450 | 2.47   | 1.94  | 3  | 3  | 1134 | 121.4 | 9.33 |
| Q8NCS4 | OS=Homo sapiens<br>GN=ZMYM6NB<br>PE=2 SV=1 - [ZMYNB_HUMAN]<br>Probable ATP-dependent RNA helicase                                                                | 11.69 | 2 | 2  | 2  | 3  | 0.813 | 0.860 | 0.892 | 1.450 | 6.85   | 11.69 | 3  | 3  | 154  | 16.9  | 9.17 |
| Q9NY93 | OS=Homo sapiens<br>GN=DDX56<br>PE=1 SV=1 - [DDX56_HUMAN]<br>CDP-diacylglycerol-3-glycerol-3-phosphate 3-phosphatidyltransferase,                                 | 6.76  | 1 | 3  | 3  | 12 | 1.069 | 0.860 | 0.857 | 1.451 | 18.16  | 6.76  | 6  | 12 | 547  | 61.6  | 9.26 |
| Q32NB8 | mitochondrial<br>OS=Homo sapiens<br>GN=PGS1<br>PE=2 SV=1 - [PGPS1_HUMAN]                                                                                         | 2.52  | 1 | 1  | 1  | 2  | 1.266 | 1.127 | 0.936 | 1.451 | 3.94   | 2.52  | 2  | 2  | 556  | 62.7  | 8.90 |

|        |                                                                                                            |       |   |   |    |     |       |       |       |       |        |       |    |     |      |       |       |
|--------|------------------------------------------------------------------------------------------------------------|-------|---|---|----|-----|-------|-------|-------|-------|--------|-------|----|-----|------|-------|-------|
| Q9UG56 | Phosphatidyserine decarboxylase proenzyme<br>OS=Homo sapiens<br>GN=PISD PE=2 SV=4 - [PISD_HUMAN]           | 1.71  | 1 | 1 | 1  | 1   | 0.925 | 0.809 | 1.111 | 1.451 | 2.64   | 1.71  | 1  | 1   | 409  | 46.6  | 9.42  |
| Q12933 | TNF receptor-associated factor 2<br>OS=Homo sapiens<br>GN=TRAF2 PE=1 SV=2 - [TRAF2_HUMAN]                  | 4.19  | 1 | 2 | 3  | 6   | 1.047 | 1.115 | 1.247 | 1.452 | 13.18  | 4.19  | 3  | 6   | 501  | 55.8  | 7.53  |
| Q6ZUT9 | DENN domain-containing protein 5B<br>OS=Homo sapiens<br>GN=DENND5B PE=1 SV=2 - [DENNB_HUMAN]               | 1.26  | 1 | 1 | 1  | 1   | 1.535 | 0.782 | 0.930 | 1.452 | 2.74   | 1.26  | 1  | 1   | 1274 | 144.9 | 6.73  |
| Q55YE7 | NHS-like protein 1<br>OS=Homo sapiens<br>GN=NHSL1 PE=1 SV=2 - [NHSL1_HUMAN]                                | 4.35  | 1 | 5 | 5  | 7   | 1.149 | 1.264 | 1.002 | 1.452 | 6.34   | 4.35  | 7  | 7   | 1610 | 170.6 | 6.96  |
| Q08170 | Serine/arginine-rich splicing factor 4<br>OS=Homo sapiens<br>GN=SRSF4 PE=1 SV=2 - [SRSF4_HUMAN]            | 17.61 | 1 | 7 | 11 | 44  | 0.911 | 1.329 | 0.951 | 1.453 | 95.93  | 17.61 | 17 | 44  | 494  | 56.6  | 11.52 |
| Q3SY00 | Testis-specific protein 10-interacting protein<br>OS=Homo sapiens<br>GN=TSGA10IP PE=2 SV=2 - [T10IP_HUMAN] | 6.65  | 1 | 1 | 2  | 2   | 1.630 | 0.808 | 1.649 | 1.453 | 5.16   | 6.65  | 2  | 2   | 556  | 62.3  | 10.05 |
| Q5T2E6 | UPF0668 protein C10orf76<br>OS=Homo sapiens<br>GN=C10orf76 PE=2 SV=1 - [CJ076_HUMAN]                       | 2.76  | 1 | 2 | 2  | 6   | 1.342 | 0.809 | 0.965 | 1.454 | 17.31  | 2.76  | 3  | 6   | 689  | 78.7  | 6.60  |
| P62805 | Histone H4<br>OS=Homo sapiens<br>GN=HIST1H4A PE=1 SV=2 - [H4_HUMAN]                                        | 54.37 | 1 | 9 | 9  | 486 | 1.376 | 2.014 | 1.005 | 1.454 | 938.11 | 54.37 | 18 | 486 | 103  | 11.4  | 11.36 |
| O14773 | Tripeptidyl-peptidase 1<br>OS=Homo sapiens<br>GN=TPP1 PE=1 SV=2 - [TPP1_HUMAN]                             | 9.41  | 1 | 4 | 4  | 28  | 1.266 | 1.276 | 1.086 | 1.454 | 92.95  | 9.41  | 7  | 28  | 563  | 61.2  | 6.48  |

|        |                                                                                                             |       |   |   |   |   |       |       |       |       |       |       |   |   |      |       |      |
|--------|-------------------------------------------------------------------------------------------------------------|-------|---|---|---|---|-------|-------|-------|-------|-------|-------|---|---|------|-------|------|
| P43628 | Killer cell immunoglobulin-like receptor 2DL3<br>OS=Homo sapiens<br>GN=KIR2DL3<br>PE=1 SV=1 - [K12L3_HUMAN] | 4.99  | 2 | 1 | 1 | 1 | 1.233 | 1.258 | 1.819 | 1.455 | 0.00  | 4.99  | 1 | 1 | 341  | 37.9  | 6.71 |
| Q8NFH4 | Nudeopodin Nup37<br>OS=Homo sapiens<br>GN=NUP37<br>PE=1 SV=1 - [NUP37_HUMAN]                                | 3.99  | 1 | 1 | 1 | 3 | 1.231 | 1.131 | 0.792 | 1.455 | 5.49  | 3.99  | 2 | 3 | 326  | 36.7  | 5.92 |
| Q06330 | Recombining binding protein suppressor of hairless<br>OS=Homo sapiens<br>GN=RBPJ PE=1 SV=3 - [SUH_HUMAN]    | 6.40  | 2 | 3 | 3 | 3 | 1.380 | 1.350 | 1.181 | 1.455 | 7.32  | 6.40  | 3 | 3 | 500  | 55.6  | 7.18 |
| Q9NQC1 | Protein Jade-2<br>OS=Homo sapiens<br>GN=JADE2<br>PE=1 SV=2 - [JADE2_HUMAN]                                  | 2.53  | 1 | 1 | 1 | 1 | 1.252 | 1.277 | 1.266 | 1.456 | 0.00  | 2.53  | 1 | 1 | 790  | 87.4  | 5.26 |
| Q9Y6Q3 | Zinc finger protein 37 homolog<br>OS=Homo sapiens<br>GN=ZFP37<br>PE=2 SV=3 - [ZFP37_HUMAN]                  | 5.71  | 1 | 3 | 3 | 3 | 1.340 | 1.854 | 1.604 | 1.458 | 5.42  | 5.71  | 3 | 3 | 630  | 71.2  | 9.09 |
| O15213 | WD repeat-containing protein 46<br>OS=Homo sapiens<br>GN=WDR46<br>PE=1 SV=3 - [WDR46_HUMAN]                 | 5.57  | 1 | 2 | 2 | 2 | 0.777 | 1.273 | 1.958 | 1.458 | 6.66  | 5.57  | 2 | 2 | 610  | 68.0  | 9.67 |
| Q9Y5Q8 | General transcription factor 3C polypeptide 5<br>OS=Homo sapiens<br>GN=GTF3C5<br>PE=1 SV=2 - [TF3C5_HUMAN]  | 5.01  | 1 | 2 | 2 | 3 | 1.258 | 0.783 | 0.964 | 1.458 | 6.44  | 5.01  | 3 | 3 | 519  | 59.5  | 6.90 |
| Q5EBL8 | PDZ domain-containing protein 11<br>OS=Homo sapiens<br>GN=PDZD11<br>PE=1 SV=2 - [PDZ11_HUMAN]               | 22.86 | 1 | 2 | 3 | 9 | 1.455 | 1.416 | 1.522 | 1.459 | 23.19 | 22.86 | 4 | 9 | 140  | 16.1  | 7.21 |
| O43306 | Adenylate cyclase type 6<br>OS=Homo sapiens<br>GN=ADCY6<br>PE=1 SV=2 - [ADCY6_HUMAN]                        | 3.00  | 1 | 2 | 3 | 5 | 1.063 | 0.724 | 0.995 | 1.459 | 17.39 | 3.00  | 4 | 5 | 1168 | 130.5 | 8.22 |



|        |                                                                                                                       |       |   |   |   |    |       |       |       |       |        |       |    |    |      |       |      |
|--------|-----------------------------------------------------------------------------------------------------------------------|-------|---|---|---|----|-------|-------|-------|-------|--------|-------|----|----|------|-------|------|
| P13497 | Bone morphogenetic protein 1<br>OS=Homo sapiens<br>GN=BMP1<br>PE=1 SV=2 - [BMP1_HUMAN]                                | 1.62  | 1 | 1 | 1 | 2  | 0.953 | 1.041 | 1.929 | 1.459 | 5.04   | 1.62  | 2  | 2  | 986  | 111.2 | 6.90 |
| P26358 | DNA (cytosine-5)-methyltransferase 1<br>OS=Homo sapiens<br>GN=DNMT1<br>PE=1 SV=2 - [DNMT1_HUMAN]                      | 5.69  | 1 | 8 | 8 | 12 | 0.881 | 1.041 | 0.738 | 1.459 | 21.65  | 5.69  | 10 | 12 | 1616 | 183.0 | 7.75 |
| Q9NUL5 | UPF0515 protein C19orf66<br>OS=Homo sapiens<br>GN=C19orf66<br>PE=1 SV=2 - [CS066_HUMAN]                               | 13.75 | 1 | 4 | 4 | 18 | 1.813 | 1.086 | 1.101 | 1.459 | 40.52  | 13.75 | 8  | 18 | 291  | 33.1  | 7.25 |
| Q9H4I0 | Double-strand-break repair protein rad21-like protein 1<br>OS=Homo sapiens<br>GN=RAD21L1<br>PE=2 SV=3 - [RD21L_HUMAN] | 8.45  | 1 | 2 | 2 | 2  | 1.248 | 0.753 | 0.796 | 1.460 | 5.20   | 8.45  | 2  | 2  | 556  | 63.3  | 5.16 |
| Q8IU81 | Interferon regulatory factor 2-binding protein 1<br>OS=Homo sapiens<br>GN=IRF2BP1<br>PE=1 SV=1 - [I2BP1_HUMAN]        | 16.10 | 1 | 6 | 6 | 20 | 1.289 | 1.236 | 0.975 | 1.461 | 37.84  | 16.10 | 10 | 20 | 584  | 61.6  | 8.18 |
| P16157 | Ankyrin-1<br>OS=Homo sapiens<br>GN=ANK1<br>PE=1 SV=3 - [ANK1_HUMAN]                                                   | 0.80  | 1 | 1 | 1 | 1  | 1.894 | 0.798 | 1.073 | 1.461 | 0.00   | 0.80  | 1  | 1  | 1881 | 206.1 | 6.01 |
| Q9NPD3 | Exosome complex component RRP41<br>OS=Homo sapiens<br>GN=EXOSC4<br>PE=1 SV=3 - [EXOS4_HUMAN]                          | 7.35  | 1 | 2 | 2 | 5  | 1.218 | 0.956 | 0.844 | 1.461 | 3.92   | 7.35  | 3  | 5  | 245  | 26.4  | 6.52 |
| O14828 | Secretory carrier-associated membrane protein 3<br>OS=Homo sapiens<br>GN=SCAMP3<br>PE=1 SV=3 - [SCAM3_HUMAN]          | 27.67 | 1 | 7 | 7 | 43 | 1.259 | 1.075 | 0.930 | 1.462 | 128.85 | 27.67 | 11 | 43 | 347  | 38.3  | 7.64 |

|        |                                                                                                                               |       |   |   |   |    |       |       |       |       |       |       |   |    |      |       |       |
|--------|-------------------------------------------------------------------------------------------------------------------------------|-------|---|---|---|----|-------|-------|-------|-------|-------|-------|---|----|------|-------|-------|
| Q9UNW9 | RNA-binding protein Nove-2<br>OS=Homo sapiens<br>GN=NOVA2<br>PE=1 SV=1 - [NOVA2_HUMAN]                                        | 3.86  | 1 | 1 | 2 | 3  | 1.186 | 1.873 | 1.168 | 1.462 | 4.43  | 3.86  | 3 | 3  | 492  | 49.0  | 8.16  |
| Q5MNV8 | F-box only protein 47<br>OS=Homo sapiens<br>GN=FBXO47<br>PE=2 SV=2 - [FBX47_HUMAN]                                            | 2.88  | 1 | 1 | 1 | 1  | 1.840 | 1.196 | 1.900 | 1.462 | 0.00  | 2.88  | 1 | 1  | 452  | 51.9  | 8.35  |
| Q13823 | Nucleolar GTP-binding protein 2<br>OS=Homo sapiens<br>GN=GNL2<br>PE=1 SV=1 - [NOG2_HUMAN]                                     | 2.19  | 1 | 2 | 2 | 2  | 0.507 | 0.873 | 0.873 | 1.463 | 2.07  | 2.19  | 2 | 2  | 731  | 83.6  | 9.25  |
| Q9Y5U8 | Mitochondrial pyruvate carrier 1<br>OS=Homo sapiens<br>GN=MPC1<br>PE=1 SV=1 - [MPC1_HUMAN]                                    | 6.42  | 1 | 1 | 1 | 1  | 2.538 | 1.042 | 0.979 | 1.463 | 2.11  | 6.42  | 1 | 1  | 109  | 12.3  | 9.61  |
| O95873 | Uncharacterized protein C6orf47<br>OS=Homo sapiens<br>GN=C6orf47<br>PE=2 SV=2 - [CF047_HUMAN]                                 | 4.42  | 1 | 1 | 1 | 1  | 1.686 | 0.957 | 1.057 | 1.464 | 3.09  | 4.42  | 1 | 1  | 294  | 31.7  | 6.37  |
| Q7L4I2 | Arginine/serine-rich coiled-coil protein 2<br>OS=Homo sapiens<br>GN=RSRC2<br>PE=1 SV=1 - [RSRC2_HUMAN]                        | 5.76  | 1 | 2 | 2 | 5  | 1.026 | 1.244 | 1.301 | 1.465 | 14.47 | 5.76  | 3 | 5  | 434  | 50.5  | 11.33 |
| Q96AX2 | Ras-related protein Rab-37<br>OS=Homo sapiens<br>GN=RAB37<br>PE=1 SV=3 - [RAB37_HUMAN]                                        | 10.76 | 3 | 1 | 3 | 23 | 4.026 | 1.163 | 0.908 | 1.466 | 48.85 | 10.76 | 4 | 23 | 223  | 24.8  | 6.35  |
| Q9BY12 | S phase cyclin A-associated protein in the endoplasmic reticulum<br>OS=Homo sapiens<br>GN=SCAPER<br>PE=1 SV=2 - [SCAPE_HUMAN] | 4.29  | 1 | 3 | 4 | 6  | 1.196 | 2.052 | 0.721 | 1.466 | 4.61  | 4.29  | 4 | 6  | 1400 | 158.2 | 7.44  |
| Q53GS9 | U4/U6.U5 tri-snRNP-associated protein 2<br>OS=Homo sapiens<br>GN=USP39<br>PE=1 SV=2 - [SNUT2_HUMAN]                           | 4.42  | 1 | 3 | 4 | 5  | 0.905 | 0.992 | 1.100 | 1.466 | 11.01 | 4.42  | 5 | 5  | 565  | 65.3  | 8.91  |

|        |                                                                                                                           |       |   |    |    |    |       |       |       |       |        |       |    |    |      |       |      |
|--------|---------------------------------------------------------------------------------------------------------------------------|-------|---|----|----|----|-------|-------|-------|-------|--------|-------|----|----|------|-------|------|
| Q14331 | Protein FRG1<br>OS=Homo sapiens<br>GN=FRG1<br>PE=1 SV=1 - [FRG1_HUMAN]                                                    | 8.91  | 2 | 2  | 2  | 3  | 0.888 | 1.046 | 1.034 | 1.467 | 7.46   | 8.91  | 3  | 3  | 258  | 29.2  | 9.01 |
| Q9BY42 | Protein RTF2<br>homolog<br>OS=Homo sapiens<br>GN=RTFDC1<br>PE=1 SV=3 - [RTF2_HUMAN]                                       | 20.59 | 1 | 5  | 5  | 14 | 0.949 | 0.983 | 1.252 | 1.467 | 28.61  | 20.59 | 8  | 14 | 306  | 33.9  | 8.59 |
| Q96S44 | TP53-<br>regulating<br>kinase<br>OS=Homo sapiens<br>GN=TP53RK<br>PE=1 SV=2 - [PRPK_HUMAN]                                 | 7.51  | 1 | 2  | 2  | 4  | 0.996 | 0.872 | 1.097 | 1.467 | 8.09   | 7.51  | 3  | 4  | 253  | 28.1  | 9.54 |
| Q7Z2K6 | Endoplasmic<br>reticulum<br>metallopeptidase 1<br>OS=Homo sapiens<br>GN=ERMP1<br>PE=1 SV=2 - [ERMP1_HUMAN]                | 5.75  | 1 | 5  | 5  | 17 | 1.149 | 1.304 | 0.882 | 1.468 | 33.80  | 5.75  | 9  | 17 | 904  | 100.2 | 7.52 |
| O15438 | Canalicular<br>multispecific<br>organic anion<br>transporter 2<br>OS=Homo sapiens<br>GN=ABCC3<br>PE=1 SV=3 - [MRP3_HUMAN] | 12.18 | 1 | 12 | 14 | 43 | 2.132 | 0.776 | 0.754 | 1.468 | 108.52 | 12.18 | 22 | 43 | 1527 | 169.2 | 7.20 |
| Q96RT7 | Gamma-tubulin<br>complex<br>component 6<br>OS=Homo sapiens<br>GN=TUBGCP6<br>PE=1 SV=3 - [GCP6_HUMAN]                      | 3.74  | 1 | 4  | 4  | 8  | 1.393 | 1.522 | 1.945 | 1.468 | 19.23  | 3.74  | 6  | 8  | 1819 | 200.4 | 6.32 |
| P51965 | Ubiquitin-<br>conjugating<br>enzyme E2 E1<br>OS=Homo sapiens<br>GN=UBE2E1<br>PE=1 SV=1 - [UB2E1_HUMAN]                    | 17.10 | 2 | 2  | 3  | 3  | 1.441 | 1.910 | 1.926 | 1.468 | 4.70   | 17.10 | 3  | 3  | 193  | 21.4  | 8.53 |
| Q13185 | Chromobox<br>protein<br>homolog 3<br>OS=Homo sapiens<br>GN=CBX3<br>PE=1 SV=4 - [CBX3_HUMAN]                               | 43.72 | 1 | 8  | 9  | 50 | 1.455 | 1.511 | 0.952 | 1.469 | 136.11 | 43.72 | 14 | 50 | 183  | 20.8  | 5.33 |
| P23921 | Ribonucleoside-<br>diphosphate<br>reductase<br>large subunit<br>OS=Homo sapiens<br>GN=RRM1<br>PE=1 SV=1 - [RIR1_HUMAN]    | 20.83 | 1 | 11 | 11 | 20 | 0.942 | 1.025 | 0.744 | 1.470 | 50.80  | 20.83 | 15 | 20 | 792  | 90.0  | 7.15 |

|        |                                                                                                                       |       |   |    |    |     |       |       |       |       |        |       |    |     |     |       |       |
|--------|-----------------------------------------------------------------------------------------------------------------------|-------|---|----|----|-----|-------|-------|-------|-------|--------|-------|----|-----|-----|-------|-------|
| P15121 | Aldose reductase<br>OS=Homo sapiens<br>GN=AKR1B1<br>PE=1 SV=3 - [ALDR_HUMAN]                                          | 61.71 | 2 | 19 | 20 | 229 | 2.106 | 0.540 | 0.940 | 1.470 | 492.62 | 61.71 | 33 | 229 | 316 | 35.8  | 6.98  |
| Q9NZM5 | Glioma tumor suppressor candidate region gene 2 protein<br>OS=Homo sapiens<br>GN=GLTSCR2<br>PE=1 SV=2 - [GSCR2_HUMAN] | 11.51 | 1 | 4  | 4  | 9   | 0.838 | 0.842 | 0.823 | 1.471 | 14.14  | 11.51 | 7  | 9   | 478 | 54.4  | 10.32 |
| Q9NQ4  | Exosome complex component RRP46<br>OS=Homo sapiens<br>GN=EXOSC5<br>PE=1 SV=1 - [EXOSC5_HUMAN]                         | 23.40 | 1 | 3  | 3  | 4   | 1.050 | 1.106 | 0.719 | 1.471 | 5.78   | 23.40 | 3  | 4   | 235 | 25.2  | 7.59  |
| Q9BZK7 | F-box-like/WD repeat-containing protein TBL1XR1<br>OS=Homo sapiens<br>GN=TBL1XR1<br>PE=1 SV=1 - [TBL1R_HUMAN]         | 9.14  | 3 | 4  | 4  | 15  | 0.867 | 1.135 | 0.787 | 1.471 | 37.61  | 9.14  | 6  | 15  | 514 | 55.6  | 5.55  |
| Q96RD7 | Pannexin-1<br>OS=Homo sapiens<br>GN=PANX1<br>PE=1 SV=4 - [PANX1_HUMAN]                                                | 6.81  | 1 | 2  | 3  | 7   | 1.284 | 1.343 | 0.719 | 1.471 | 15.90  | 6.81  | 4  | 7   | 426 | 48.0  | 6.01  |
| Q92598 | Heat shock protein 105 kDa<br>OS=Homo sapiens<br>GN=HSPH1<br>PE=1 SV=1 - [HS105_HUMAN]                                | 30.89 | 2 | 21 | 26 | 111 | 1.053 | 1.122 | 1.046 | 1.471 | 268.91 | 30.89 | 40 | 111 | 858 | 96.8  | 5.39  |
| Q81Y85 | EF-hand calcium-binding domain-containing protein 13<br>OS=Homo sapiens<br>GN=EFCAB13<br>PE=1 SV=2 - [EFC13_HUMAN]    | 1.03  | 1 | 1  | 1  | 1   | 0.665 | 0.910 | 0.685 | 1.472 | 2.45   | 1.03  | 1  | 1   | 973 | 110.1 | 6.57  |
| O14745 | Na(+)/H(+) exchange regulatory cofactor NHERF1<br>OS=Homo sapiens<br>GN=SLC9A3R1<br>PE=1 SV=4 - [NHERF1_HUMAN]        | 13.97 | 1 | 5  | 5  | 16  | 1.103 | 1.354 | 1.248 | 1.472 | 33.61  | 13.97 | 6  | 16  | 358 | 38.8  | 5.77  |

|        |                                                                                                              |       |   |    |    |     |       |       |       |       |        |       |     |     |      |       |      |
|--------|--------------------------------------------------------------------------------------------------------------|-------|---|----|----|-----|-------|-------|-------|-------|--------|-------|-----|-----|------|-------|------|
| P51811 | Membrane transport protein XK<br>OS=Homo sapiens GN=XK PE=1 SV=5 - [XK_HUMAN]                                | 3.60  | 1 | 1  | 1  | 1   | 1.866 | 1.738 | 1.424 | 1.472 | 0.00   | 3.60  | 1   | 1   | 444  | 50.9  | 8.25 |
| P13747 | HLA class I histocompatibility antigen, alpha chain E<br>OS=Homo sapiens GN=HLA-E PE=1 SV=3 - [HLAE_HUMAN]   | 20.95 | 1 | 3  | 5  | 31  | 1.296 | 1.160 | 0.695 | 1.472 | 86.28  | 20.95 | 8   | 31  | 358  | 40.1  | 5.95 |
| P48651 | Phosphatidyserine synthase 1<br>OS=Homo sapiens GN=PTDSS1 PE=1 SV=1 - [PTSS1_HUMAN]                          | 4.23  | 1 | 2  | 2  | 5   | 1.823 | 0.930 | 0.954 | 1.472 | 11.23  | 4.23  | 3   | 5   | 473  | 55.5  | 8.43 |
| Q8NG31 | Protein CASC5<br>OS=Homo sapiens GN=CASC5 PE=1 SV=3 - [CASC5_HUMAN]                                          | 2.69  | 1 | 2  | 4  | 23  | 2.461 | 1.924 | 1.095 | 1.472 | 32.07  | 2.69  | 5   | 23  | 2342 | 265.2 | 5.47 |
| Q14980 | Nuclear mitotic apparatus protein 1<br>OS=Homo sapiens GN=NUMA1 PE=1 SV=2 - [NUMA1_HUMAN]                    | 35.22 | 1 | 66 | 68 | 227 | 1.605 | 1.872 | 0.916 | 1.473 | 580.35 | 35.22 | 104 | 227 | 2115 | 238.1 | 5.78 |
| Q8NE18 | Putative methyltransferase NSUN7<br>OS=Homo sapiens GN=NSUN7 PE=2 SV=4 - [NSUN7_HUMAN]                       | 1.53  | 1 | 1  | 1  | 1   | 0.643 | 0.713 | 0.732 | 1.473 | 2.31   | 1.53  | 1   | 1   | 718  | 81.0  | 8.75 |
| Q6ZM23 | Nesprin-3<br>OS=Homo sapiens GN=SYNE3 PE=1 SV=2 - [SYNE3_HUMAN]                                              | 13.23 | 2 | 12 | 13 | 49  | 1.069 | 0.618 | 0.851 | 1.473 | 132.13 | 13.23 | 18  | 49  | 975  | 112.1 | 6.23 |
| Q6P2C8 | Mediator of RNA polymerase II transcription subunit 27<br>OS=Homo sapiens GN=MED27 PE=1 SV=1 - [MED27_HUMAN] | 3.22  | 1 | 1  | 1  | 2   | 0.898 | 1.080 | 1.025 | 1.473 | 5.67   | 3.22  | 2   | 2   | 311  | 35.4  | 9.31 |
| O60636 | Tetraspanin-2<br>OS=Homo sapiens GN=TSPAN2 PE=2 SV=2 - [TSN2_HUMAN]                                          | 8.14  | 1 | 2  | 2  | 3   | 8.312 | 0.226 | 0.596 | 1.474 | 7.78   | 8.14  | 3   | 3   | 221  | 24.1  | 7.77 |

|        |                                                                                                                 |       |   |    |    |     |       |       |       |       |        |       |    |     |      |       |       |
|--------|-----------------------------------------------------------------------------------------------------------------|-------|---|----|----|-----|-------|-------|-------|-------|--------|-------|----|-----|------|-------|-------|
| Q8N806 | Putative E3 ubiquitin-protein ligase UBR7<br>OS=Homo sapiens<br>GN=UBR7<br>PE=1 SV=2 - [UBR7_HUMAN]             | 4.47  | 1 | 2  | 2  | 13  | 0.874 | 1.079 | 0.925 | 1.474 | 29.35  | 4.47  | 3  | 13  | 425  | 48.0  | 4.81  |
| O60306 | Intron-binding protein aquarius<br>OS=Homo sapiens<br>GN=AQR PE=1 SV=4 - [AQR_HUMAN]                            | 4.31  | 1 | 6  | 8  | 25  | 1.106 | 1.306 | 0.983 | 1.474 | 57.67  | 4.31  | 11 | 25  | 1485 | 171.2 | 6.37  |
| P16401 | Histone H1.5<br>OS=Homo sapiens<br>GN=H1ST1H1B<br>PE=1 SV=3 - [H15_HUMAN]                                       | 42.04 | 1 | 13 | 20 | 239 | 1.325 | 1.801 | 0.798 | 1.475 | 451.93 | 42.04 | 30 | 239 | 226  | 22.6  | 10.92 |
| Q96Q89 | Kinesin-like protein KIF20B<br>OS=Homo sapiens<br>GN=KIF20B<br>PE=1 SV=3 - [KIF20B_HUMAN]                       | 2.47  | 1 | 3  | 5  | 12  | 1.125 | 2.135 | 1.987 | 1.476 | 21.66  | 2.47  | 5  | 12  | 1820 | 210.5 | 5.67  |
| Q9P016 | Thymocyte nuclear protein 1<br>OS=Homo sapiens<br>GN=THYN1<br>PE=1 SV=1 - [THYN1_HUMAN]                         | 29.33 | 1 | 7  | 7  | 23  | 1.234 | 2.158 | 1.149 | 1.476 | 50.27  | 29.33 | 9  | 23  | 225  | 25.7  | 9.25  |
| O15120 | 1-acyl-sn-glycerol-3-phosphate acyltransferase beta<br>OS=Homo sapiens<br>GN=AGPAT2<br>PE=1 SV=1 - [PLCB_HUMAN] | 5.04  | 1 | 1  | 1  | 2   | 1.275 | 0.608 | 0.988 | 1.477 | 9.57   | 5.04  | 1  | 2   | 278  | 30.9  | 9.01  |
| Q17R31 | Putative deoxyribonuclease TATDN3<br>OS=Homo sapiens<br>GN=TATDN3<br>PE=1 SV=1 - [TATDN3_HUMAN]                 | 4.38  | 1 | 2  | 2  | 6   | 1.093 | 0.964 | 0.993 | 1.478 | 10.39  | 4.38  | 3  | 6   | 274  | 30.3  | 7.15  |
| P43490 | Nicotinamide phosphoribosyltransferase<br>OS=Homo sapiens<br>GN=NAMPT<br>PE=1 SV=1 - [NAMPT_HUMAN]              | 48.27 | 1 | 23 | 23 | 192 | 1.260 | 1.258 | 1.034 | 1.478 | 507.48 | 48.27 | 36 | 192 | 491  | 55.5  | 7.15  |
| Q96FB5 | Protein RRNAD1<br>OS=Homo sapiens<br>GN=RRNAD1<br>PE=2 SV=2 - [RRNAD_HUMAN]                                     | 1.47  | 1 | 1  | 1  | 1   | 0.889 | 1.179 | 2.941 | 1.480 | 2.13   | 1.47  | 1  | 1   | 475  | 52.9  | 7.97  |

|        |                                                                                                                                    |       |   |   |   |    |       |       |       |       |       |       |    |    |      |       |      |
|--------|------------------------------------------------------------------------------------------------------------------------------------|-------|---|---|---|----|-------|-------|-------|-------|-------|-------|----|----|------|-------|------|
| Q96EY5 | Multivesicular<br>body subunit<br>12A OS=Homo<br>sapiens<br>GN=MVB12A<br>PE=1 SV=1 -<br>[MB12A_HUMAN<br>N]                         | 10.99 | 1 | 2 | 2 | 2  | 1.181 | 0.625 | 1.093 | 1.480 | 5.86  | 10.99 | 2  | 2  | 273  | 28.8  | 8.91 |
| O43759 | Synaptogyrin-1<br>OS=Homo<br>sapiens<br>GN=SYNGR1<br>PE=1 SV=2 -<br>[SNG1_HUMAN]                                                   | 10.30 | 1 | 2 | 2 | 10 | 1.645 | 0.509 | 0.669 | 1.480 | 18.12 | 10.30 | 4  | 10 | 233  | 25.4  | 4.68 |
| Q9NUQ3 | Gamma-taxilin<br>OS=Homo<br>sapiens<br>GN=TXLNG<br>PE=1 SV=2 -<br>[TXLNG_HUMAN<br>]                                                | 13.83 | 2 | 4 | 8 | 17 | 0.740 | 1.513 | 1.122 | 1.480 | 35.15 | 13.83 | 11 | 17 | 528  | 60.5  | 7.52 |
| O76041 | Nebulette<br>OS=Homo<br>sapiens<br>GN=NEBL PE=1<br>SV=1 -<br>[NEBL_HUMAN]                                                          | 2.07  | 1 | 2 | 2 | 2  | 1.202 | 0.481 | 0.643 | 1.480 | 0.00  | 2.07  | 2  | 2  | 1014 | 116.4 | 7.99 |
| Q86UA1 | Pre-mRNA-<br>processing<br>factor 39<br>OS=Homo<br>sapiens<br>GN=PRPF39<br>PE=1 SV=3 -<br>[PRP39_HUMAN<br>]                        | 3.89  | 1 | 2 | 2 | 4  | 0.841 | 1.059 | 1.230 | 1.481 | 7.97  | 3.89  | 2  | 4  | 669  | 78.4  | 5.40 |
| Q5VZ46 | Uncharacterize<br>d protein<br>KIAA1614<br>OS=Homo<br>sapiens<br>GN=KIAA1614<br>PE=2 SV=3 -<br>[K1614_HUMAN<br>]                   | 6.30  | 1 | 4 | 4 | 8  | 0.785 | 0.576 | 1.331 | 1.482 | 2.02  | 6.30  | 4  | 8  | 1190 | 126.5 | 8.82 |
| Q96SN8 | CDK5<br>regulatory<br>subunit-<br>associated<br>protein 2<br>OS=Homo<br>sapiens<br>GN=CDK5RAP2<br>PE=1 SV=5 -<br>[CK5P2_HUMAN<br>] | 2.27  | 3 | 2 | 6 | 13 | 0.752 | 0.916 | 1.048 | 1.483 | 16.06 | 2.27  | 6  | 13 | 1893 | 214.9 | 5.58 |
| Q9H3Z7 | Abhydrolase<br>domain-<br>containing<br>protein 16B<br>OS=Homo<br>sapiens<br>GN=ABHD16B<br>PE=2 SV=1 -<br>[ABHGB_HUMAN<br>]        | 1.49  | 1 | 1 | 1 | 1  | 1.358 | 2.213 | 0.990 | 1.483 | 2.44  | 1.49  | 1  | 1  | 469  | 52.5  | 8.57 |
| P29083 | General<br>transcription<br>factor IIE<br>subunit 1<br>OS=Homo<br>sapiens<br>GN=GTF2E1<br>PE=1 SV=2 -<br>[T2EA_HUMAN]              | 8.43  | 1 | 3 | 4 | 5  | 0.561 | 0.888 | 0.648 | 1.483 | 14.38 | 8.43  | 4  | 5  | 439  | 49.4  | 4.82 |

|        |                                                                                                                                                                                                             |       |   |    |    |     |       |       |       |       |        |       |    |     |      |       |       |
|--------|-------------------------------------------------------------------------------------------------------------------------------------------------------------------------------------------------------------|-------|---|----|----|-----|-------|-------|-------|-------|--------|-------|----|-----|------|-------|-------|
| Q14683 | Structural maintenance of chromosomes protein 1A<br>OS=Homo sapiens<br>GN=SMC1A<br>PE=1 SV=2 - [SMC1A_HUMAN]<br>Probable RNA-binding protein 19<br>OS=Homo sapiens<br>GN=RBM19<br>PE=1 SV=3 - [RBM19_HUMAN] | 33.50 | 3 | 40 | 41 | 119 | 1.293 | 1.394 | 0.906 | 1.483 | 278.09 | 33.50 | 62 | 119 | 1233 | 143.1 | 7.64  |
| Q9Y4C8 | Mediator of RNA polymerase II transcription subunit 13<br>OS=Homo sapiens<br>GN=MED13<br>PE=1 SV=3 - [MED13_HUMAN]                                                                                          | 8.65  | 1 | 5  | 6  | 6   | 1.572 | 1.339 | 0.996 | 1.484 | 14.05  | 8.65  | 6  | 6   | 960  | 107.3 | 6.54  |
| Q9UHV7 | Nuclear pore complex protein Nup50<br>OS=Homo sapiens<br>GN=NUP50<br>PE=1 SV=2 - [NUP50_HUMAN]                                                                                                              | 0.46  | 1 | 1  | 1  | 2   | 1.176 | 1.404 | 1.510 | 1.484 | 6.71   | 0.46  | 1  | 2   | 2174 | 239.1 | 5.64  |
| Q9UKX7 | LYR motif-containing protein 5<br>OS=Homo sapiens<br>GN=LYRM5<br>PE=1 SV=2 - [LYRM5_HUMAN]                                                                                                                  | 19.87 | 1 | 7  | 7  | 17  | 0.972 | 1.029 | 0.762 | 1.485 | 48.64  | 19.87 | 11 | 17  | 468  | 50.1  | 7.06  |
| Q6IPR1 | SH3 and multiple ankyrin repeat domains protein 1<br>OS=Homo sapiens<br>GN=SHANK1<br>PE=1 SV=2 - [SHANK1_HUMAN]                                                                                             | 10.00 | 1 | 1  | 1  | 2   | 2.182 | 0.988 | 1.049 | 1.485 | 4.41   | 10.00 | 1  | 2   | 90   | 10.9  | 9.92  |
| Q9Y566 | Vesicle transport protein GOT1B<br>OS=Homo sapiens<br>GN=GOLT1B<br>PE=1 SV=1 - [GOLT1B_HUMAN]                                                                                                               | 3.33  | 1 | 3  | 3  | 4   | 1.226 | 0.651 | 1.143 | 1.486 | 7.05   | 3.33  | 3  | 4   | 2161 | 224.8 | 8.15  |
| Q9Y3E0 | Protein ELYS<br>OS=Homo sapiens<br>GN=AHCTF1<br>PE=1 SV=3 - [ELYS_HUMAN]                                                                                                                                    | 9.42  | 1 | 1  | 1  | 3   | 2.387 | 1.754 | 1.294 | 1.486 | 7.48   | 9.42  | 1  | 3   | 138  | 15.4  | 10.36 |
| Q8WYP5 |                                                                                                                                                                                                             | 3.80  | 1 | 7  | 8  | 12  | 1.198 | 1.217 | 1.047 | 1.486 | 27.16  | 3.80  | 9  | 12  | 2266 | 252.3 | 6.60  |



|        |                                                                                                                                                                                                                                             |       |   |    |    |    |       |       |       |       |        |       |    |    |      |       |       |
|--------|---------------------------------------------------------------------------------------------------------------------------------------------------------------------------------------------------------------------------------------------|-------|---|----|----|----|-------|-------|-------|-------|--------|-------|----|----|------|-------|-------|
| Q7L9B9 | Endonuclease/<br>exonuclease/phosphatase<br>family domain-<br>containing<br>protein 1<br>OS=Homo<br>sapiens<br>GN=EEPD1<br>PE=1 SV=2 -<br>[EEPD1_HUMAN<br>]                                                                                 | 16.52 | 1 | 8  | 8  | 18 | 1.548 | 0.742 | 1.485 | 1.487 | 49.37  | 16.52 | 12 | 18 | 569  | 62.4  | 8.41  |
| O95391 | Pre-mRNA-<br>splicing factor<br>SLU7<br>OS=Homo<br>sapiens<br>GN=SLU7 PE=1<br>SV=2 -<br>[SLU7_HUMAN]                                                                                                                                        | 1.19  | 1 | 1  | 1  | 1  | 1.338 | 1.370 | 1.063 | 1.490 | 3.01   | 1.19  | 1  | 1  | 586  | 68.3  | 7.14  |
| P22570 | NADPH:adrenodoxin<br>oxidoreductase<br>, mitochondrial<br>OS=Homo<br>sapiens<br>GN=FDXR<br>PE=1 SV=3 -<br>[ADRO_HUMAN]                                                                                                                      | 37.68 | 1 | 18 | 18 | 46 | 1.174 | 1.313 | 1.050 | 1.490 | 113.46 | 37.68 | 30 | 46 | 491  | 53.8  | 8.44  |
| O75525 | KH domain-<br>containing,<br>RNA-binding,<br>signal<br>transduction-<br>associated<br>protein 3<br>OS=Homo<br>sapiens<br>GN=KHDRBS3<br>PE=1 SV=1 -<br>[KHDR3_HUMAN<br>]                                                                     | 17.63 | 1 | 5  | 7  | 18 | 1.006 | 0.916 | 1.226 | 1.492 | 46.49  | 17.63 | 7  | 18 | 346  | 38.8  | 7.61  |
| Q96N53 | Putative<br>uncharacterized<br>protein<br>encoded by<br>LINC00167<br>OS=Homo<br>sapiens<br>GN=LINC00167<br>PE=5 SV=1 -<br>[CK037_HUMAN<br>Protein canopy<br>homolog 3<br>OS=Homo<br>sapiens<br>GN=CNPY3<br>PE=1 SV=1 -<br>[CNPY3_HUMAN<br>] | 11.56 | 1 | 1  | 1  | 1  | 2.795 | 1.326 | 1.399 | 1.492 | 2.50   | 11.56 | 1  | 1  | 147  | 15.4  | 11.85 |
| Q9BT09 | NACHT, LRR<br>and PYD<br>domains-<br>containing<br>protein 2<br>OS=Homo<br>sapiens<br>GN=NLRP2<br>PE=1 SV=1 -<br>[NALP2_HUMAN<br>]                                                                                                          | 34.17 | 1 | 8  | 8  | 29 | 0.970 | 1.226 | 0.869 | 1.493 | 77.49  | 34.17 | 14 | 29 | 278  | 30.7  | 5.49  |
| Q9NX02 | OS=Homo<br>sapiens<br>GN=NLRP2<br>PE=1 SV=1 -<br>[NALP2_HUMAN<br>]                                                                                                                                                                          | 0.85  | 1 | 1  | 1  | 1  | 0.278 | 0.329 | 1.464 | 1.493 | 0.00   | 0.85  | 1  | 1  | 1062 | 120.4 | 6.07  |

|        |                                                                                                                                                                              |       |   |   |   |    |       |       |       |       |       |       |   |      |       |       |      |
|--------|------------------------------------------------------------------------------------------------------------------------------------------------------------------------------|-------|---|---|---|----|-------|-------|-------|-------|-------|-------|---|------|-------|-------|------|
| Q9P2R6 | Arginine-glutamic acid dipeptide repeats protein OS=Homo sapiens GN=RERE PE=1 SV=2 - [RERE_HUMAN] Surfeit locus protein 1 OS=Homo sapiens GN=SURF1 PE=1 SV=1 - [SURF1_HUMAN] | 0.51  | 1 | 1 | 1 | 1  | 0.717 | 1.744 | 1.493 | 2.20  | 0.51  | 1     | 1 | 1566 | 172.3 | 7.69  |      |
| Q15526 | Nuclear factor erythroid 2-related factor 2 OS=Homo sapiens GN=NFE2L2 PE=1 SV=3 - [NFE2L2_HUMAN]                                                                             | 7.00  | 1 | 2 | 2 | 3  | 2.154 | 1.961 | 2.164 | 1.493 | 3.91  | 7.00  | 3 | 3    | 300   | 33.3  | 9.60 |
| Q16236 | Protein dpy-30 homolog OS=Homo sapiens GN=DPY30 PE=1 SV=1 - [DPY30_HUMAN]                                                                                                    | 0.99  | 1 | 1 | 1 | 1  | 0.971 | 0.684 | 0.885 | 1.494 | 1.75  | 0.99  | 1 | 1    | 605   | 67.8  | 4.78 |
| Q9C005 | FERM, RhoGEF and plectstrin domain-containing protein 2 OS=Homo sapiens GN=FARP2 PE=1 SV=3 - [FARP2_HUMAN]                                                                   | 17.17 | 2 | 3 | 3 | 7  | 2.365 | 2.070 | 1.296 | 1.495 | 5.77  | 17.17 | 5 | 7    | 99    | 11.2  | 4.88 |
| O94887 | Homeobox protein HoxA9 OS=Homo sapiens GN=HOXA9 PE=1 SV=4 - [HOXA9_HUMAN]                                                                                                    | 5.60  | 1 | 3 | 4 | 6  | 0.872 | 1.633 | 1.338 | 1.496 | 8.77  | 5.60  | 4 | 6    | 1054  | 119.8 | 8.79 |
| P31269 | Splicing factor 3B subunit 4 OS=Homo sapiens GN=SF3B4 PE=1 SV=1 - [SF3B4_HUMAN]                                                                                              | 4.41  | 2 | 1 | 1 | 1  | 1.948 | 0.975 | 1.084 | 1.496 | 0.00  | 4.41  | 1 | 1    | 272   | 30.2  | 8.62 |
| Q15427 | Transcription initiation factor TFIID subunit 4 OS=Homo sapiens GN=TAF4 PE=1 SV=2 - [TAF4_HUMAN]                                                                             | 15.57 | 1 | 4 | 4 | 15 | 1.092 | 1.251 | 1.018 | 1.497 | 44.95 | 15.57 | 5 | 15   | 424   | 44.4  | 8.56 |
| O00268 |                                                                                                                                                                              | 5.81  | 1 | 3 | 3 | 6  | 1.506 | 1.334 | 1.228 | 1.498 | 7.10  | 5.81  | 4 | 6    | 1085  | 110.0 | 9.94 |

|        |                                                                                                                                                 |       |   |   |   |    |       |       |       |       |       |       |   |    |      |       |      |
|--------|-------------------------------------------------------------------------------------------------------------------------------------------------|-------|---|---|---|----|-------|-------|-------|-------|-------|-------|---|----|------|-------|------|
| P50150 | Guanine<br>nucleotide-<br>binding protein<br>G(I)/G(S)/G(O)<br>subunit gamma-<br>4 OS=Homo<br>sapiens<br>GN=GNG4<br>PE=1 SV=1 -<br>[GBG4_HUMAN] | 21.33 | 1 | 1 | 1 | 1  | 2.469 | 0.807 | 0.741 | 1.498 | 1.79  | 21.33 | 1 | 1  | 75   | 8.4   | 7.08 |
| Q8WYLS | Protein<br>phosphatase<br>Slingshot<br>homolog 1<br>OS=Homo<br>sapiens<br>GN=SSH1<br>PE=1 SV=2 -<br>[SSH1_HUMAN]                                | 10.49 | 1 | 7 | 8 | 10 | 0.927 | 0.934 | 1.262 | 1.498 | 25.75 | 10.49 | 8 | 10 | 1049 | 115.4 | 6.25 |
| Q9H446 | RWD domain-<br>containing<br>protein 1<br>OS=Homo<br>sapiens<br>GN=RWDD1<br>PE=1 SV=1 -<br>[RWDD1_HUMAN]                                        | 4.53  | 1 | 2 | 2 | 2  | 0.722 | 0.959 | 0.943 | 1.498 | 0.00  | 4.53  | 2 | 2  | 243  | 27.9  | 4.20 |
| Q9Y679 | Ancient<br>ubiquitous<br>protein 1<br>OS=Homo<br>sapiens<br>GN=AUP1<br>PE=1 SV=1 -<br>[AUP1_HUMAN]                                              | 12.82 | 1 | 5 | 5 | 11 | 1.265 | 1.243 | 0.725 | 1.498 | 31.97 | 12.82 | 6 | 11 | 476  | 53.0  | 8.09 |
| Q7Z7F0 | UPF0469<br>protein<br>KIAA0907<br>OS=Homo<br>sapiens<br>GN=KIAA0907<br>PE=1 SV=1 -<br>[K0907_HUMAN]                                             | 4.72  | 1 | 1 | 2 | 2  | 1.086 | 1.714 | 1.209 | 1.498 | 3.21  | 4.72  | 2 | 2  | 614  | 64.8  | 8.73 |
| Q5VST6 | Alpha/beta<br>hydrolase<br>domain-<br>containing<br>protein 17B<br>OS=Homo<br>sapiens<br>GN=ABHD17B<br>PE=2 SV=1 -<br>[AB17B_HUMAN]             | 2.78  | 1 | 1 | 1 | 1  | 0.836 | 1.210 | 1.099 | 1.499 | 1.82  | 2.78  | 1 | 1  | 288  | 32.2  | 6.29 |
| P00374 | Dihydrofolate<br>reductase<br>OS=Homo<br>sapiens<br>GN=DHFR<br>PE=1 SV=2 -<br>[DYSR_HUMAN]                                                      | 7.49  | 1 | 1 | 1 | 3  | 1.291 | 1.092 | 0.958 | 1.499 | 7.59  | 7.49  | 2 | 3  | 187  | 21.4  | 7.42 |
| Q9Y333 | U6 snRNA-<br>associated Sm-<br>like protein<br>LSM2<br>OS=Homo<br>sapiens<br>GN=LSM2<br>PE=1 SV=1 -<br>[LSM2_HUMAN]                             | 27.37 | 1 | 4 | 4 | 7  | 1.121 | 1.622 | 1.415 | 1.499 | 19.01 | 27.37 | 6 | 7  | 95   | 10.8  | 6.52 |

|        |                                                                                                                                                                                                 |       |   |    |    |    |       |       |       |       |        |       |    |    |      |       |      |
|--------|-------------------------------------------------------------------------------------------------------------------------------------------------------------------------------------------------|-------|---|----|----|----|-------|-------|-------|-------|--------|-------|----|----|------|-------|------|
| Q13671 | Ras and Rab<br>interactor 1<br>OS=Homo<br>sapiens<br>GN=RINI PE=1<br>SV=4 -<br>[RINI_HUMAN]                                                                                                     | 9.83  | 1 | 5  | 5  | 9  | 0.837 | 1.273 | 1.033 | 1.503 | 23.20  | 9.83  | 7  | 9  | 783  | 84.0  | 8.02 |
| P35269 | General<br>transcription<br>factor IIF<br>subunit 1<br>OS=Homo<br>sapiens<br>GN=GTF2F1<br>PE=1 SV=2 -<br>[T2FA_HUMAN]                                                                           | 17.60 | 1 | 10 | 10 | 17 | 1.505 | 0.890 | 0.766 | 1.503 | 40.12  | 17.60 | 10 | 17 | 517  | 58.2  | 7.49 |
| Q96I15 | Selenocysteine<br>lyase<br>OS=Homo<br>sapiens<br>GN=SCLY PE=1<br>SV=4 -<br>[SCLY_HUMAN]                                                                                                         | 22.02 | 1 | 7  | 7  | 26 | 1.069 | 0.843 | 1.058 | 1.503 | 62.25  | 22.02 | 10 | 26 | 445  | 48.1  | 7.12 |
| Q9P0P8 | Uncharacterize<br>d protein<br>C6orf203<br>OS=Homo<br>sapiens<br>GN=C6orf203<br>PE=1 SV=1 -<br>[CF203_HUMAN<br>]                                                                                | 9.17  | 1 | 1  | 1  | 1  | 1.150 | 1.671 | 1.107 | 1.505 | 5.68   | 9.17  | 1  | 1  | 240  | 27.9  | 9.29 |
| P61218 | DNA-directed<br>RNA<br>polymerases I,<br>II, and III<br>subunit<br>RPABC2<br>OS=Homo<br>sapiens<br>GN=POLR2F<br>PE=1 SV=1 -<br>[RPAB2_HUMAN<br>]                                                | 6.30  | 1 | 1  | 1  | 1  | 0.981 | 1.318 | 1.074 | 1.505 | 1.93   | 6.30  | 1  | 1  | 127  | 14.5  | 4.22 |
| O60264 | SWI/SNF-<br>related matrix-<br>associated<br>actin-<br>dependent<br>regulator of<br>chromatin<br>subfamily A<br>member 5<br>OS=Homo<br>sapiens<br>GN=SMARCA5<br>PE=1 SV=1 -<br>[SMCA5_HUMA<br>] | 14.45 | 1 | 11 | 15 | 51 | 1.097 | 1.368 | 1.024 | 1.505 | 114.44 | 14.45 | 24 | 51 | 1052 | 121.8 | 8.09 |
| Q93074 | Mediator of<br>RNA<br>polymerase II<br>transcription<br>subunit 12<br>OS=Homo<br>sapiens<br>GN=MED12<br>PE=1 SV=4 -<br>[MED12_HUMA<br>N]                                                        | 1.24  | 1 | 2  | 2  | 13 | 1.369 | 1.135 | 0.812 | 1.506 | 40.59  | 1.24  | 2  | 13 | 2177 | 242.9 | 7.05 |

|        |                                                                                                                                               |       |   |   |   |    |       |       |       |       |       |       |    |    |      |       |      |
|--------|-----------------------------------------------------------------------------------------------------------------------------------------------|-------|---|---|---|----|-------|-------|-------|-------|-------|-------|----|----|------|-------|------|
| Q96CM8 | Acyl-CoA<br>synthetase<br>family member<br>2,<br>mitochondrial<br>OS=Homo<br>sapiens<br>GN=ACSF2<br>PE=1 SV=2 -<br>[ACSF2_HUMAN]              | 14.15 | 1 | 7 | 7 | 21 | 1.050 | 0.761 | 0.970 | 1.506 | 63.79 | 14.15 | 10 | 21 | 615  | 68.1  | 7.55 |
| Q15274 | Nicotinate-<br>nucleotide<br>pyrophosphoryl<br>ase<br>[carboxylating]<br>OS=Homo<br>sapiens<br>GN=QPRT<br>PE=1 SV=3 -<br>[NADC_HUMAN]         | 17.51 | 1 | 5 | 5 | 16 | 0.947 | 1.106 | 0.530 | 1.507 | 28.56 | 17.51 | 8  | 16 | 297  | 30.8  | 6.21 |
| Q9BZX2 | Uridine-cytidine<br>kinase 2<br>OS=Homo<br>sapiens<br>GN=UCK2<br>PE=1 SV=1 -<br>[UCK2_HUMAN]                                                  | 17.62 | 2 | 5 | 5 | 13 | 0.899 | 0.617 | 0.845 | 1.507 | 32.35 | 17.62 | 7  | 13 | 261  | 29.3  | 6.70 |
| Q86UK5 | Limbin<br>OS=Homo<br>sapiens<br>GN=EVC2<br>PE=1 SV=1 -<br>[LBN_HUMAN]                                                                         | 3.67  | 1 | 3 | 4 | 5  | 1.600 | 1.257 | 0.605 | 1.507 | 10.45 | 3.67  | 4  | 5  | 1308 | 147.9 | 6.96 |
| Q96G21 | U3 small<br>nucleolar<br>ribonucleoprot<br>ein protein<br>IMP4<br>OS=Homo<br>sapiens<br>GN=IMP4<br>PE=1 SV=1 -<br>[IMP4_HUMAN]                | 12.03 | 1 | 2 | 2 | 11 | 0.975 | 0.929 | 0.623 | 1.508 | 41.29 | 12.03 | 4  | 11 | 291  | 33.7  | 9.47 |
| Q5SXM8 | DNL-type zinc<br>finger protein<br>OS=Homo<br>sapiens<br>GN=DNLZ PE=1<br>SV=1 -<br>[DNLZ_HUMAN]                                               | 13.48 | 1 | 2 | 2 | 4  | 1.073 | 1.419 | 1.258 | 1.509 | 11.90 | 13.48 | 4  | 4  | 178  | 19.2  | 9.80 |
| Q9BRT2 | Ubiquinol-<br>cytochrome-c<br>reductase<br>complex<br>assembly factor<br>2 OS=Homo<br>sapiens<br>GN=UQCC2<br>PE=1 SV=1 -<br>[UQCC2_HUMA<br>N] | 21.43 | 1 | 3 | 3 | 5  | 1.159 | 1.410 | 0.908 | 1.510 | 18.09 | 21.43 | 4  | 5  | 126  | 14.9  | 7.37 |
| Q9BSI4 | TERF1-<br>interacting<br>nuclear factor<br>2 OS=Homo<br>sapiens<br>GN=TINF2<br>PE=1 SV=1 -<br>[TINF2_HUMAN<br>]                               | 5.99  | 1 | 2 | 2 | 4  | 1.117 | 0.701 | 0.776 | 1.510 | 2.35  | 5.99  | 2  | 4  | 451  | 50.0  | 7.96 |

|        |                                                                                                                              |       |   |   |   |    |       |       |       |       |        |       |    |    |      |       |      |
|--------|------------------------------------------------------------------------------------------------------------------------------|-------|---|---|---|----|-------|-------|-------|-------|--------|-------|----|----|------|-------|------|
| Q9ULX3 | RNA-binding protein NOB1<br>OS=Homo sapiens<br>GN=NOB1<br>PE=1 SV=1 - [NOB1_HUMAN]                                           | 4.61  | 1 | 2 | 2 | 3  | 1.124 | 0.971 | 0.828 | 1.511 | 8.32   | 4.61  | 3  | 3  | 412  | 46.6  | 7.18 |
| P52292 | Importin subunit alpha-1<br>OS=Homo sapiens<br>GN=KPNA2<br>PE=1 SV=1 - [IMA1_HUMAN]                                          | 17.20 | 1 | 9 | 9 | 40 | 0.834 | 0.784 | 0.768 | 1.512 | 119.39 | 17.20 | 14 | 40 | 529  | 57.8  | 5.40 |
| Q9H628 | Ras-related and estrogen-regulated growth inhibitor-like protein<br>OS=Homo sapiens<br>GN=RERGL<br>PE=2 SV=1 - [RERGL_HUMAN] | 6.83  | 1 | 1 | 1 | 2  | 1.178 | 0.563 |       | 1.513 | 5.10   | 6.83  | 1  | 2  | 205  | 23.8  | 9.51 |
| Q9HC98 | Serine/threonine-protein kinase Nek6<br>OS=Homo sapiens<br>GN=NEK6<br>PE=1 SV=2 - [NEK6_HUMAN]                               | 11.50 | 1 | 2 | 4 | 16 | 1.328 | 1.223 | 1.044 | 1.513 | 40.64  | 11.50 | 6  | 16 | 313  | 35.7  | 8.03 |
| Q01201 | Transcription factor RelB<br>OS=Homo sapiens<br>GN=RELB PE=1 SV=2 - [RELB_HUMAN]                                             | 6.56  | 1 | 2 | 3 | 4  | 1.404 | 1.146 | 1.574 | 1.514 | 5.78   | 6.56  | 4  | 4  | 579  | 62.1  | 6.24 |
| Q6NUN0 | Acyl-coenzyme A synthetase ACSM5, mitochondrial<br>OS=Homo sapiens<br>GN=ACSM5<br>PE=2 SV=2 - [ACSM5_HUMAN]                  | 3.11  | 1 | 1 | 1 | 2  | 1.390 | 0.987 | 0.933 | 1.514 | 2.79   | 3.11  | 1  | 2  | 579  | 64.7  | 8.40 |
| Q14031 | Collagen alpha-6(IV) chain<br>OS=Homo sapiens<br>GN=COL4A6<br>PE=1 SV=3 - [COL4A6_HUMAN]                                     | 3.19  | 1 | 3 | 3 | 3  | 1.393 | 1.532 | 1.200 | 1.515 | 6.08   | 3.19  | 3  | 3  | 1691 | 163.7 | 9.20 |
| Q96ME7 | Zinc finger protein 512<br>OS=Homo sapiens<br>GN=ZNF512<br>PE=1 SV=2 - [ZNF512_HUMAN]                                        | 5.11  | 1 | 3 | 3 | 6  | 1.522 | 1.095 | 1.236 | 1.516 | 11.72  | 5.11  | 4  | 6  | 567  | 64.6  | 9.76 |
| O95674 | Phosphatidate cytidyltransferase 2<br>OS=Homo sapiens<br>GN=CDS2<br>PE=1 SV=1 - [CDS2_HUMAN]                                 | 9.89  | 1 | 2 | 3 | 10 | 1.558 | 0.641 | 0.569 | 1.517 | 30.92  | 9.89  | 5  | 10 | 445  | 51.4  | 7.09 |

|        |                                                                                                                               |       |   |    |    |    |       |       |       |       |        |       |    |    |     |      |      |
|--------|-------------------------------------------------------------------------------------------------------------------------------|-------|---|----|----|----|-------|-------|-------|-------|--------|-------|----|----|-----|------|------|
| P24941 | Cylin-<br>dependent<br>kinase 2<br>OS=Homo<br>sapiens<br>GN=CDK2<br>PE=1 SV=2 -<br>[CDK2_HUMAN]                               | 23.15 | 8 | 4  | 7  | 19 | 1.132 | 1.031 | 1.010 | 1.517 | 32.05  | 23.15 | 10 | 19 | 298 | 33.9 | 8.68 |
| Q9BQ67 | Glutamate-rich<br>WD repeat-<br>containing<br>protein 1<br>OS=Homo<br>sapiens<br>GN=GRWD1<br>PE=1 SV=1 -<br>[GRWD1_HUMA<br>N] | 10.31 | 1 | 4  | 4  | 6  | 0.828 | 1.156 | 0.986 | 1.518 | 14.81  | 10.31 | 6  | 6  | 446 | 49.4 | 4.92 |
| Q8WXW3 | Progesterone-<br>induced-<br>blocking factor<br>1 OS=Homo<br>sapiens<br>GN=PIBF1<br>PE=1 SV=2 -<br>[PIBF1_HUMAN<br>]          | 3.96  | 1 | 2  | 4  | 5  | 0.819 | 1.378 | 1.233 | 1.518 | 9.13   | 3.96  | 4  | 5  | 757 | 89.7 | 6.02 |
| Q9Y3B9 | RRP15-like<br>protein<br>OS=Homo<br>sapiens<br>GN=RRP15<br>PE=1 SV=2 -<br>[RRP15_HUMAN<br>]                                   | 8.16  | 1 | 3  | 3  | 7  | 0.621 | 0.830 | 0.808 | 1.518 | 13.99  | 8.16  | 4  | 7  | 282 | 31.5 | 5.52 |
| O75934 | Pre-mRNA-<br>splicing factor<br>SPF27<br>OS=Homo<br>sapiens<br>GN=BCAS2<br>PE=1 SV=1 -<br>[SPF27_HUMAN<br>]                   | 24.89 | 1 | 6  | 6  | 17 | 1.087 | 1.408 | 1.046 | 1.518 | 40.31  | 24.89 | 9  | 17 | 225 | 26.1 | 5.66 |
| Q16831 | Uridine<br>phosphorylase<br>1 OS=Homo<br>sapiens<br>GN=UPP1<br>PE=1 SV=1 -<br>[UPP1_HUMAN]                                    | 9.68  | 1 | 3  | 3  | 5  | 1.357 | 0.670 | 1.097 | 1.518 | 13.37  | 9.68  | 3  | 5  | 310 | 33.9 | 7.88 |
| Q9H706 | GRB2-<br>associated and<br>regulator of<br>MAPK protein<br>OS=Homo<br>sapiens<br>GN=GAREM<br>PE=1 SV=2 -<br>[GAREM_HUMA<br>N] | 0.91  | 1 | 1  | 1  | 1  | 1.270 | 1.120 | 1.423 | 1.520 | 1.69   | 0.91  | 1  | 1  | 876 | 97.1 | 6.77 |
| P31689 | DnaJ homolog<br>subfamily A<br>member 1<br>OS=Homo<br>sapiens<br>GN=DNAJA1<br>PE=1 SV=2 -<br>[DNAJA1_HUMAN<br>]               | 39.55 | 3 | 14 | 16 | 70 | 1.167 | 1.112 | 1.006 | 1.520 | 185.43 | 39.55 | 26 | 70 | 397 | 44.8 | 7.08 |
| P02787 | Serotransferrin<br>OS=Homo<br>sapiens GN=TF<br>PE=1 SV=3 -<br>[TRFE_HUMAN]                                                    | 2.01  | 1 | 1  | 1  | 3  | 1.474 | 0.543 | 0.683 | 1.521 | 7.34   | 2.01  | 1  | 3  | 698 | 77.0 | 7.12 |

|        |                                                                                                                                     |       |   |   |   |    |       |       |        |       |       |       |   |    |     |      |       |
|--------|-------------------------------------------------------------------------------------------------------------------------------------|-------|---|---|---|----|-------|-------|--------|-------|-------|-------|---|----|-----|------|-------|
| P52926 | High mobility group protein HMGI-C<br>OS=Homo sapiens<br>GN=HMGA2<br>PE=1 SV=1 - [HMGA2_HUMAN]<br>E3 ubiquitin-protein ligase RING1 | 41.28 | 1 | 4 | 4 | 26 | 1.213 | 3.180 | 10.678 | 1.521 | 69.20 | 41.28 | 6 | 26 | 109 | 11.8 | 10.62 |
| Q06587 | OS=Homo sapiens<br>GN=RING1<br>PE=1 SV=2 - [RING1_HUMAN]<br>Transformer-2 protein homolog alpha                                     | 14.29 | 1 | 4 | 4 | 13 | 1.098 | 1.139 | 1.190  | 1.523 | 33.05 | 14.29 | 7 | 13 | 406 | 42.4 | 5.62  |
| Q13595 | OS=Homo sapiens<br>GN=TRA2A<br>PE=1 SV=1 - [TRA2A_HUMAN]<br>Interferon-related developmental regulator 2                            | 26.60 | 1 | 4 | 6 | 21 | 1.136 | 1.290 | 0.848  | 1.523 | 52.61 | 26.60 | 8 | 21 | 282 | 32.7 | 11.27 |
| Q12894 | OS=Homo sapiens<br>GN=IFRD2<br>PE=1 SV=3 - [IFRD2_HUMAN]<br>Zinc finger MYND domain-containing protein 11                           | 4.15  | 1 | 2 | 2 | 2  | 0.454 | 1.369 | 1.237  | 1.524 | 0.00  | 4.15  | 2 | 2  | 506 | 54.8 | 7.94  |
| Q15326 | OS=Homo sapiens<br>GN=ZMYND11<br>PE=1 SV=2 - [ZMY11_HUMAN]<br>Homeobox protein GBX-2                                                | 2.33  | 1 | 1 | 2 | 3  | 1.269 | 1.586 | 1.174  | 1.525 | 8.09  | 2.33  | 2 | 3  | 602 | 70.9 | 8.53  |
| P52951 | OS=Homo sapiens<br>GN=GBX2<br>PE=2 SV=3 - [GBX2_HUMAN]<br>Transmembrane prolyl 4-hydroxylase                                        | 10.06 | 1 | 2 | 2 | 2  | 1.847 | 1.991 | 2.016  | 1.525 | 4.73  | 10.06 | 2 | 2  | 348 | 37.3 | 8.38  |
| Q9NXG6 | OS=Homo sapiens<br>GN=P4HTM<br>PE=1 SV=2 - [P4HTM_HUMAN]<br>High mobility group nucleosome-binding domain-containing protein 4      | 12.55 | 1 | 4 | 4 | 18 | 1.431 | 0.986 | 0.970  | 1.526 | 53.59 | 12.55 | 6 | 18 | 502 | 56.6 | 6.06  |
| Q00479 | OS=Homo sapiens<br>GN=HMGN4<br>PE=1 SV=3 - [HMGN4_HUMAN]                                                                            | 47.78 | 1 | 4 | 4 | 19 | 1.742 | 2.047 | 1.491  | 1.527 | 20.67 | 47.78 | 5 | 19 | 90  | 9.5  | 10.48 |



|        |                                                                                                                     |       |   |    |    |     |       |       |       |       |        |       |    |     |      |       |      |
|--------|---------------------------------------------------------------------------------------------------------------------|-------|---|----|----|-----|-------|-------|-------|-------|--------|-------|----|-----|------|-------|------|
| Q9Y6N5 | Sulfide:quinone oxidoreductase, mitochondrial<br>OS=Homo sapiens<br>GN=SQRDL<br>PE=1 SV=1 - [SQRD_HUMAN]            | 57.11 | 1 | 28 | 28 | 304 | 1.694 | 0.745 | 0.910 | 1.527 | 853.02 | 57.11 | 47 | 304 | 450  | 49.9  | 9.11 |
| Q9NRP4 | Succinate dehydrogenase assembly factor 3, mitochondrial<br>OS=Homo sapiens<br>GN=ACN9<br>PE=2 SV=1 - [SDHF3_HUMAN] | 4.80  | 1 | 1  | 1  | 1   | 0.822 | 1.163 | 1.080 | 1.528 | 0.00   | 4.80  | 1  | 1   | 125  | 14.6  | 9.07 |
| Q9H1B7 | Interferon regulatory factor 2-binding protein-like<br>OS=Homo sapiens<br>GN=IRF2BPL<br>PE=1 SV=1 - [I2BPL_HUMAN]   | 14.95 | 1 | 7  | 8  | 22  | 1.748 | 2.047 | 1.388 | 1.529 | 69.04  | 14.95 | 12 | 22  | 796  | 82.6  | 8.24 |
| P04179 | Superoxide dismutase [Mn], mitochondrial<br>OS=Homo sapiens<br>GN=SOD2<br>PE=1 SV=2 - [SODM_HUMAN]                  | 36.94 | 1 | 12 | 12 | 325 | 1.643 | 2.262 | 1.684 | 1.529 | 730.29 | 36.94 | 21 | 325 | 222  | 24.7  | 8.25 |
| Q5M775 | Cytosin-B<br>OS=Homo sapiens<br>GN=SPECC1<br>PE=1 SV=1 - [CYTSB_HUMAN]                                              | 10.39 | 1 | 10 | 10 | 20  | 2.135 | 0.931 | 0.711 | 1.529 | 58.07  | 10.39 | 13 | 20  | 1068 | 118.5 | 6.70 |
| Q8IZM8 | Zinc finger protein 654<br>OS=Homo sapiens<br>GN=ZNF654<br>PE=2 SV=3 - [ZNF654_HUMAN]                               | 2.07  | 1 | 1  | 1  | 2   | 0.906 | 1.628 | 1.840 | 1.529 | 2.71   | 2.07  | 1  | 2   | 581  | 65.8  | 5.58 |
| P39748 | Flap endonuclease 1<br>OS=Homo sapiens<br>GN=FEN1<br>PE=1 SV=1 - [FEN1_HUMAN]                                       | 24.47 | 1 | 8  | 8  | 25  | 1.548 | 1.266 | 0.808 | 1.530 | 61.14  | 24.47 | 11 | 25  | 380  | 42.6  | 8.62 |
| P26583 | High mobility group protein B2<br>OS=Homo sapiens<br>GN=HMGB2<br>PE=1 SV=2 - [HMGB2_HUMAN]                          | 40.67 | 1 | 11 | 15 | 43  | 1.521 | 3.726 | 0.709 | 1.531 | 90.09  | 40.67 | 21 | 43  | 209  | 24.0  | 7.81 |
| Q6P3W2 | DnaJ homolog subfamily C member 24<br>OS=Homo sapiens<br>GN=DNAJC24<br>PE=1 SV=1 - [DJC24_HUMAN]                    | 11.49 | 1 | 1  | 2  | 2   |       | 1.218 | 2.542 | 1.532 | 2.20   | 11.49 | 2  | 2   | 148  | 17.0  | 4.65 |

|        |                                                                                                                                                                                                                              |       |   |    |    |    |       |       |       |       |        |       |    |    |     |      |      |
|--------|------------------------------------------------------------------------------------------------------------------------------------------------------------------------------------------------------------------------------|-------|---|----|----|----|-------|-------|-------|-------|--------|-------|----|----|-----|------|------|
| Q01658 | Protein Dr1<br>OS=Homo sapiens<br>GN=DR1 PE=1 SV=1 -<br>[NC2B_HUMAN]                                                                                                                                                         | 21.59 | 1 | 4  | 4  | 26 | 1.080 | 1.300 | 1.486 | 1.532 | 78.46  | 21.59 | 6  | 26 | 176 | 19.4 | 4.75 |
| Q4G0U5 | Cilia- and flagella-associated protein 221<br>OS=Homo sapiens<br>GN=CFAP221 PE=1 SV=2 -<br>[PCDP1_HUMAN<br>Succinate--hydroxymethylglutarate CoA-transferase<br>OS=Homo sapiens<br>GN=SUGCT PE=1 SV=2 -<br>[SUCHY_HUMAN<br>] | 1.43  | 1 | 1  | 1  | 1  | 1.326 | 1.131 | 0.995 | 1.533 | 2.26   | 1.43  | 1  | 1  | 840 | 96.8 | 8.62 |
| Q9HAC7 | MutS protein homolog 5<br>OS=Homo sapiens<br>GN=MSH5 PE=1 SV=1 -<br>[MSH5_HUMAN]                                                                                                                                             | 4.49  | 1 | 2  | 2  | 2  | 1.118 | 1.114 | 1.046 | 1.535 | 2.23   | 4.49  | 2  | 2  | 445 | 48.4 | 8.35 |
| O43196 | Methylmalonate-semialdehyde dehydrogenase [acylating], mitochondrial<br>OS=Homo sapiens<br>GN=ALDH6A1 PE=1 SV=2 -<br>[MMSA_HUMAN<br>]                                                                                        | 2.52  | 1 | 1  | 2  | 3  | 0.661 | 2.951 | 2.212 | 1.535 | 2.32   | 2.52  | 2  | 3  | 834 | 92.8 | 6.37 |
| Q02252 | DnaJ homolog subfamily C member 9<br>OS=Homo sapiens<br>GN=DNAJC9 PE=1 SV=1 -<br>[DNJC9_HUMAN<br>]                                                                                                                           | 25.98 | 1 | 13 | 14 | 37 | 0.837 | 1.292 | 1.024 | 1.537 | 91.47  | 25.98 | 22 | 37 | 535 | 57.8 | 8.50 |
| Q8WXX5 | Diacylglycerol kinase beta<br>OS=Homo sapiens<br>GN=DGKB PE=2 SV=2 -<br>[DGKB_HUMAN]                                                                                                                                         | 15.00 | 1 | 4  | 4  | 9  | 1.103 | 1.496 | 1.038 | 1.539 | 23.24  | 15.00 | 6  | 9  | 260 | 29.9 | 5.73 |
| Q9Y6T7 | Heterogeneous nuclear ribonucleoprotein A/B<br>OS=Homo sapiens<br>GN=HNRNPAB PE=1 SV=2 -<br>[ROAA_HUMAN]                                                                                                                     | 1.99  | 1 | 1  | 1  | 1  | 1.105 | 0.466 | 0.746 | 1.540 | 0.00   | 1.99  | 1  | 1  | 804 | 90.5 | 7.85 |
| Q99729 |                                                                                                                                                                                                                              | 26.81 | 1 | 10 | 11 | 61 | 0.978 | 1.124 | 0.900 | 1.540 | 147.36 | 26.81 | 17 | 61 | 332 | 36.2 | 8.21 |

|        |                                                                                                                                                                                    |       |   |    |    |    |       |       |       |       |       |       |    |    |      |       |      |
|--------|------------------------------------------------------------------------------------------------------------------------------------------------------------------------------------|-------|---|----|----|----|-------|-------|-------|-------|-------|-------|----|----|------|-------|------|
| Q6PCB7 | Long-chain fatty acid transport protein 1<br>OS=Homo sapiens<br>GN=SLC27A1<br>PE=2 SV=1 - [S27A1_HUMAN]                                                                            | 4.95  | 1 | 3  | 3  | 5  | 1.404 | 1.078 | 1.041 | 1.541 | 6.49  | 4.95  | 5  | 5  | 646  | 71.1  | 8.53 |
| O14981 | TATA-binding protein-associated factor 172<br>OS=Homo sapiens<br>GN=BTAF1<br>PE=1 SV=2 - [BTAF1_HUMAN<br>Protein FAM9C<br>OS=Homo sapiens<br>GN=FAM9C<br>PE=2 SV=1 - [FAM9C_HUMAN] | 3.52  | 1 | 4  | 5  | 10 | 0.813 | 1.216 | 1.226 | 1.542 | 27.05 | 3.52  | 6  | 10 | 1849 | 206.8 | 6.52 |
| Q8IZT9 | DNA mismatch repair protein Msh6<br>OS=Homo sapiens<br>GN=MSH6<br>PE=1 SV=2 - [MSH6_HUMAN]                                                                                         | 4.22  | 2 | 1  | 1  | 5  | 1.448 | 0.864 | 1.236 | 1.542 | 8.25  | 4.22  | 1  | 5  | 166  | 19.2  | 5.24 |
| P52701 | Ribonuclease P protein subunit p40<br>OS=Homo sapiens<br>GN=RPP40<br>PE=1 SV=3 - [RPP40_HUMAN]                                                                                     | 11.47 | 1 | 13 | 13 | 32 | 1.071 | 1.252 | 1.036 | 1.542 | 64.11 | 11.47 | 21 | 32 | 1360 | 152.7 | 6.90 |
| O75818 | DNA-directed RNA polymerases I, II, and III subunit<br>OS=Homo sapiens<br>GN=POLR2E<br>PE=1 SV=4 - [RPAB1_HUMAN]                                                                   | 7.44  | 1 | 3  | 3  | 8  | 0.883 | 1.171 | 1.525 | 1.543 | 25.22 | 7.44  | 5  | 8  | 363  | 41.8  | 6.67 |
| P19388 | Protein tweety homolog 1<br>OS=Homo sapiens<br>GN=TTYH1<br>PE=2 SV=1 - [TTYH1_HUMAN]                                                                                               | 25.71 | 1 | 5  | 5  | 16 | 0.806 | 1.035 | 0.895 | 1.543 | 41.75 | 25.71 | 8  | 16 | 210  | 24.5  | 5.95 |
| Q9HB13 | Programmed cell death protein 6<br>OS=Homo sapiens<br>GN=PDCC6<br>PE=1 SV=1 - [PDCC6_HUMAN]                                                                                        | 3.11  | 1 | 1  | 1  | 1  | 0.996 | 2.263 | 3.091 | 1.543 | 0.00  | 3.11  | 1  | 1  | 450  | 49.0  | 4.97 |
| O75340 | Death domain-containing protein CRADD<br>OS=Homo sapiens<br>GN=CRADD<br>PE=1 SV=1 - [CRADD_HUMAN]                                                                                  | 16.23 | 1 | 4  | 4  | 21 | 1.919 | 1.514 | 1.394 | 1.544 | 40.04 | 16.23 | 8  | 21 | 191  | 21.9  | 5.40 |
| P78560 |                                                                                                                                                                                    | 34.67 | 1 | 6  | 6  | 13 | 0.983 | 0.807 | 1.099 | 1.546 | 35.03 | 34.67 | 9  | 13 | 199  | 22.7  | 6.80 |

|        |                                                                                                                       |       |    |    |    |     |       |       |       |       |        |       |    |     |      |       |       |
|--------|-----------------------------------------------------------------------------------------------------------------------|-------|----|----|----|-----|-------|-------|-------|-------|--------|-------|----|-----|------|-------|-------|
| Q9NRX1 | RNA-binding protein PNO1<br>OS=Homo sapiens<br>GN=PNO1<br>PE=1 SV=1 - [PNO1_HUMAN]                                    | 13.89 | 1  | 4  | 4  | 8   | 0.882 | 1.417 | 1.171 | 1.546 | 18.10  | 13.89 | 4  | 8   | 252  | 27.9  | 9.73  |
| Q14164 | Inhibitor of nuclear factor kappa-B kinase subunit epsilon<br>OS=Homo sapiens<br>GN=IKBKE<br>PE=1 SV=1 - [IKKE_HUMAN] | 3.35  | 1  | 1  | 2  | 6   | 1.262 | 1.203 | 1.413 | 1.547 | 3.79   | 3.35  | 4  | 6   | 716  | 80.4  | 7.84  |
| Q9Y5G0 | Protocadherin gamma-B5<br>OS=Homo sapiens<br>GN=PCDHGB5<br>PE=2 SV=1 - [PCDGH_HUMAN]                                  | 3.47  | 26 | 2  | 3  | 5   | 0.728 | 0.876 | 1.578 | 1.549 | 12.15  | 3.47  | 3  | 5   | 923  | 99.8  | 5.05  |
| Q9NTI5 | Sister chromatid cohesion protein PDS5 homolog B<br>OS=Homo sapiens<br>GN=PDS5B<br>PE=1 SV=1 - [PDS5B_HUMAN]          | 14.37 | 1  | 17 | 18 | 34  | 1.350 | 1.467 | 0.752 | 1.551 | 69.02  | 14.37 | 24 | 34  | 1447 | 164.6 | 8.47  |
| Q96PZ0 | Pseudouridylylase synthase 7 homolog<br>OS=Homo sapiens<br>GN=PUS7<br>PE=1 SV=2 - [PUS7_HUMAN]                        | 6.96  | 1  | 4  | 4  | 6   | 0.949 | 0.882 | 0.980 | 1.551 | 15.38  | 6.96  | 6  | 6   | 661  | 75.0  | 6.37  |
| Q9UL42 | Paraneoplastic antigen Ma2<br>OS=Homo sapiens<br>GN=PNMA2<br>PE=1 SV=2 - [PNMA2_HUMAN]                                | 14.29 | 1  | 5  | 6  | 20  | 2.024 | 0.267 | 0.327 | 1.551 | 35.90  | 14.29 | 10 | 20  | 364  | 41.5  | 4.86  |
| Q5T8A7 | Protein phosphatase 1 regulatory subunit 26<br>OS=Homo sapiens<br>GN=PPP1R26<br>PE=1 SV=1 - [PPR26_HUMAN]             | 1.65  | 2  | 2  | 2  | 3   | 2.137 | 1.518 | 1.309 | 1.552 | 1.89   | 1.65  | 2  | 3   | 1209 | 127.3 | 8.59  |
| P16402 | Histone H1.3<br>OS=Homo sapiens<br>GN=HIST1H1D<br>PE=1 SV=2 - [H13_HUMAN]                                             | 39.37 | 2  | 4  | 17 | 143 | 0.682 | 6.488 | 3.465 | 1.555 | 297.09 | 39.37 | 26 | 143 | 221  | 22.3  | 11.02 |
| P01024 | Complement C3<br>OS=Homo sapiens<br>GN=C3<br>PE=1 SV=2 - [CO3_HUMAN]                                                  | 16.12 | 1  | 21 | 21 | 44  | 2.215 | 1.244 | 0.918 | 1.555 | 104.84 | 16.12 | 29 | 44  | 1663 | 187.0 | 6.40  |

|        |                                                                                                                        |       |   |    |    |    |       |       |       |       |       |       |    |    |      |       |      |
|--------|------------------------------------------------------------------------------------------------------------------------|-------|---|----|----|----|-------|-------|-------|-------|-------|-------|----|----|------|-------|------|
| Q95361 | Tripartite motif-containing protein 16<br>OS=Homo sapiens<br>GN=TRIM16<br>PE=1 SV=3 - [TRIM16_HUMAN]                   | 8.16  | 2 | 3  | 3  | 11 | 1.629 | 1.103 | 1.824 | 1.555 | 31.65 | 8.16  | 5  | 11 | 564  | 63.9  | 5.49 |
| Q9HAU8 | Arginyl aminopeptidase-like 1<br>OS=Homo sapiens<br>GN=RNPEPL1<br>PE=2 SV=2 - [RNPEPL1_HUMAN]                          | 1.42  | 1 | 1  | 1  | 1  | 1.055 | 1.418 | 0.943 | 1.556 | 2.41  | 1.42  | 1  | 1  | 494  | 55.5  | 4.91 |
| Q8NFP7 | Diphosphoinositol polyphosphate phosphohydrolase 3-alpha<br>OS=Homo sapiens<br>GN=NUDT10<br>PE=1 SV=1 - [NUDT10_HUMAN] | 41.46 | 2 | 2  | 6  | 27 | 0.870 | 1.018 | 1.266 | 1.556 | 80.47 | 41.46 | 7  | 27 | 164  | 18.5  | 5.68 |
| Q9Y5M1 | Uncharacterized protein FAM215A<br>OS=Homo sapiens<br>GN=FAM215A<br>PE=2 SV=2 - [F215A_HUMAN]                          | 14.91 | 1 | 1  | 1  | 1  | 2.066 | 1.395 | 1.632 | 1.557 | 0.00  | 14.91 | 1  | 1  | 114  | 12.0  | 7.87 |
| Q9BTC0 | Death-inducer obliterator 1<br>OS=Homo sapiens<br>GN=DIDO1<br>PE=1 SV=5 - [DIDO1_HUMAN]                                | 6.43  | 2 | 11 | 12 | 33 | 1.316 | 1.736 | 1.099 | 1.557 | 63.63 | 6.43  | 18 | 33 | 2240 | 243.7 | 7.88 |
| Q53S58 | Transmembrane protein 177<br>OS=Homo sapiens<br>GN=TMEM177<br>PE=2 SV=1 - [TM177_HUMAN]                                | 2.89  | 1 | 1  | 1  | 2  | 1.312 | 0.713 | 0.620 | 1.558 | 1.68  | 2.89  | 1  | 2  | 311  | 33.7  | 9.61 |
| Q7Z6E9 | E3 ubiquitin-protein ligase RBBP6<br>OS=Homo sapiens<br>GN=RBBP6<br>PE=1 SV=1 - [RBBP6_HUMAN]                          | 1.40  | 1 | 2  | 2  | 5  | 1.289 | 0.469 | 1.106 | 1.561 | 12.83 | 1.40  | 2  | 5  | 1792 | 201.4 | 9.64 |
| Q6ZNS5 | Zinc finger protein 574<br>OS=Homo sapiens<br>GN=ZNF574<br>PE=1 SV=2 - [ZNF574_HUMAN]                                  | 1.67  | 1 | 1  | 2  | 3  | 1.365 | 1.283 | 1.089 | 1.561 | 6.50  | 1.67  | 2  | 3  | 896  | 98.8  | 8.07 |
| Q8TCG1 | Protein CIP2A<br>OS=Homo sapiens<br>GN=KIAA1524<br>PE=1 SV=2 - [CIP2A_HUMAN]                                           | 5.19  | 1 | 4  | 4  | 6  | 3.170 | 0.922 | 0.979 | 1.561 | 7.49  | 5.19  | 4  | 6  | 905  | 102.1 | 6.23 |

|        |                                                                                                               |       |   |    |    |     |       |       |       |       |        |       |    |     |     |      |       |
|--------|---------------------------------------------------------------------------------------------------------------|-------|---|----|----|-----|-------|-------|-------|-------|--------|-------|----|-----|-----|------|-------|
| Q9H8H3 | Methyltransferase-like protein 7A OS=Homo sapiens<br>GN=METTL7A<br>PE=1 SV=1 - [MET7A_HUMAN]                  | 17.21 | 1 | 3  | 3  | 6   | 0.764 | 2.763 | 0.461 | 1.562 | 17.99  | 17.21 | 5  | 6   | 244 | 28.3 | 8.38  |
| Q86UL3 | Glycerol-3-phosphate acyltransferase 4 OS=Homo sapiens<br>GN=AGPAT6<br>PE=1 SV=1 - [GPAT4_HUMAN]              | 5.48  | 1 | 2  | 2  | 5   | 3.481 | 1.551 | 1.402 | 1.564 | 5.72   | 5.48  | 2  | 5   | 456 | 52.0 | 9.19  |
| Q9UKU7 | Isobutyryl-CoA dehydrogenase, mitochondrial OS=Homo sapiens<br>GN=ACAD8<br>PE=1 SV=1 - [ACAD8_HUMAN]          | 12.29 | 1 | 5  | 5  | 16  | 1.379 | 1.512 | 1.007 | 1.564 | 36.11  | 12.29 | 8  | 16  | 415 | 45.0 | 7.85  |
| Q8TED0 | U3 small nucleolar RNA-associated protein 15 homolog OS=Homo sapiens<br>GN=UTP15<br>PE=1 SV=3 - [UTP15_HUMAN] | 9.65  | 1 | 4  | 5  | 12  | 0.874 | 0.701 | 0.882 | 1.565 | 29.24  | 9.65  | 6  | 12  | 518 | 58.4 | 9.11  |
| O95199 | RCC1 and BTB domain-containing protein 2 OS=Homo sapiens<br>GN=RCBTB2<br>PE=2 SV=1 - [RCBT2_HUMAN]            | 3.09  | 1 | 1  | 1  | 1   | 1.415 | 1.870 | 4.193 | 1.566 | 0.00   | 3.09  | 1  | 1   | 551 | 60.3 | 5.49  |
| P0C0S5 | Histone H2A.Z OS=Homo sapiens<br>GN=H2AFZ<br>PE=1 SV=2 - [H2AZ_HUMAN]                                         | 35.94 | 2 | 3  | 6  | 49  | 1.780 | 2.719 | 0.933 | 1.566 | 128.55 | 35.94 | 10 | 49  | 128 | 13.5 | 10.58 |
| Q8NA72 | Centrosomal protein POC5 OS=Homo sapiens<br>GN=POC5<br>PE=1 SV=2 - [POC5_HUMAN]                               | 2.43  | 1 | 1  | 1  | 1   | 1.345 | 0.972 | 0.857 | 1.566 | 3.47   | 2.43  | 1  | 1   | 575 | 63.3 | 7.42  |
| P09429 | High mobility group protein B1 OS=Homo sapiens<br>GN=HMGB1<br>PE=1 SV=3 - [HMGB1_HUMAN]                       | 43.26 | 2 | 11 | 16 | 118 | 1.762 | 2.099 | 0.945 | 1.567 | 207.88 | 43.26 | 26 | 118 | 215 | 24.9 | 5.74  |
| Q15025 | TNFAIP3-interacting protein 1 OS=Homo sapiens<br>GN=TNIP1<br>PE=1 SV=2 - [TNIP1_HUMAN]                        | 1.73  | 1 | 1  | 1  | 2   | 1.442 | 0.636 | 1.097 | 1.567 | 2.28   | 1.73  | 2  | 2   | 636 | 71.8 | 6.62  |

|        |                                                                                                                               |       |   |   |   |    |       |       |       |       |       |       |    |    |      |       |      |
|--------|-------------------------------------------------------------------------------------------------------------------------------|-------|---|---|---|----|-------|-------|-------|-------|-------|-------|----|----|------|-------|------|
| Q9BSQ5 | Malcavernin<br>OS=Homo sapiens<br>GN=CCM2<br>PE=1 SV=1 - [CCM2_HUMAN]                                                         | 8.78  | 1 | 4 | 4 | 9  | 1.665 | 1.503 | 1.070 | 1.568 | 17.13 | 8.78  | 7  | 9  | 444  | 48.8  | 5.54 |
| Q8NHY5 | Checkpoint protein HUS1B<br>OS=Homo sapiens<br>GN=HUS1B<br>PE=1 SV=2 - [HUS1B_HUMAN]                                          | 5.04  | 1 | 1 | 1 | 1  | 1.189 | 0.946 | 0.829 | 1.568 | 2.08  | 5.04  | 1  | 1  | 278  | 31.0  | 9.33 |
| Q9UL45 | Biogenesis of lysosome-related organelles complex 1 subunit 6<br>OS=Homo sapiens<br>GN=BLOC1S6<br>PE=1 SV=1 - [BLOC1S6_HUMAN] | 3.49  | 1 | 1 | 1 | 1  | 1.269 | 2.097 | 1.442 | 1.568 | 0.00  | 3.49  | 1  | 1  | 172  | 19.7  | 6.40 |
| Q9Y657 | Spindlin-1<br>OS=Homo sapiens<br>GN=SPIN1<br>PE=1 SV=3 - [SPIN1_HUMAN]                                                        | 17.56 | 2 | 3 | 4 | 7  | 0.897 | 1.867 | 1.080 | 1.568 | 24.23 | 17.56 | 5  | 7  | 262  | 29.6  | 6.96 |
| P05026 | Sodium/potassium-transporting ATPase subunit beta-1<br>OS=Homo sapiens<br>GN=ATP1B1<br>PE=1 SV=1 - [AT1B1_HUMAN]              | 12.54 | 1 | 3 | 3 | 10 | 1.851 | 3.053 | 1.479 | 1.569 | 26.57 | 12.54 | 5  | 10 | 303  | 35.0  | 8.53 |
| Q96KB5 | Lymphokine-activated killer T-cell-originated protein kinase<br>OS=Homo sapiens<br>GN=PBK PE=1 SV=3 - [TOPK_HUMAN]            | 13.35 | 1 | 5 | 5 | 8  | 1.196 | 1.022 | 0.747 | 1.570 | 12.66 | 13.35 | 7  | 8  | 322  | 36.1  | 5.12 |
| P19440 | Gamma-glutamyltranspeptidase 1<br>OS=Homo sapiens<br>GN=GGT1<br>PE=1 SV=2 - [GGT1_HUMAN]                                      | 10.90 | 5 | 6 | 6 | 12 | 2.463 | 0.670 | 0.716 | 1.570 | 27.80 | 10.90 | 10 | 12 | 569  | 61.4  | 7.12 |
| Q5TB80 | Centrosomal protein of 162 kDa<br>OS=Homo sapiens<br>GN=CEP162<br>PE=1 SV=2 - [CE162_HUMAN]                                   | 1.07  | 1 | 1 | 1 | 1  | 1.304 | 1.143 | 1.470 | 1.571 | 2.08  | 1.07  | 1  | 1  | 1403 | 161.8 | 5.47 |
| O76038 | Secretagogin<br>OS=Homo sapiens<br>GN=SCGN<br>PE=1 SV=2 - [SEGN_HUMAN]                                                        | 7.61  | 1 | 1 | 1 | 2  | 0.843 | 1.214 | 0.784 | 1.571 | 0.00  | 7.61  | 1  | 2  | 276  | 32.0  | 5.41 |

|        |                                                                                                                             |       |   |    |    |     |       |       |       |       |        |       |    |     |     |      |      |
|--------|-----------------------------------------------------------------------------------------------------------------------------|-------|---|----|----|-----|-------|-------|-------|-------|--------|-------|----|-----|-----|------|------|
| P78337 | Pituitary homeobox 1<br>OS=Homo sapiens<br>GN=PITX1<br>PE=1 SV=2 - [PITX1_HUMAN]                                            | 8.60  | 3 | 2  | 2  | 6   | 1.878 | 0.860 | 1.463 | 1.572 | 13.63  | 8.60  | 3  | 6   | 314 | 34.1 | 8.98 |
| P56181 | NADH dehydrogenase [ubiquinone] flavoprotein 3, mitochondrial<br>OS=Homo sapiens<br>GN=NDUFV3<br>PE=1 SV=2 - [NDUFV3_HUMAN] | 34.26 | 1 | 2  | 2  | 3   | 1.045 | 0.768 | 0.959 | 1.573 | 9.07   | 34.26 | 2  | 3   | 108 | 11.9 | 9.70 |
| P04004 | Vitronectin<br>OS=Homo sapiens<br>GN=VTN PE=1 SV=1 - [VTNC_HUMAN]                                                           | 7.32  | 1 | 3  | 3  | 11  | 1.124 | 0.943 | 1.228 | 1.573 | 27.71  | 7.32  | 4  | 11  | 478 | 54.3 | 5.80 |
| P49321 | Nuclear autoantigenic sperm protein<br>OS=Homo sapiens<br>GN=NASP<br>PE=1 SV=2 - [NASP_HUMAN]                               | 37.18 | 3 | 24 | 25 | 109 | 1.261 | 1.503 | 0.806 | 1.573 | 288.94 | 37.18 | 39 | 109 | 788 | 85.2 | 4.30 |
| P46439 | Glutathione S-transferase Mu 5<br>OS=Homo sapiens<br>GN=GSTM5<br>PE=1 SV=3 - [GSTM5_HUMAN]                                  | 66.97 | 1 | 9  | 18 | 173 | 1.957 | 0.747 | 0.801 | 1.573 | 416.65 | 66.97 | 31 | 173 | 218 | 25.7 | 7.39 |
| Q49A26 | Putative oxidoreductase GLYR1<br>OS=Homo sapiens<br>GN=GLYR1<br>PE=1 SV=3 - [GLYR1_HUMAN]                                   | 5.42  | 1 | 2  | 2  | 3   | 1.003 | 0.886 | 0.900 | 1.574 | 4.82   | 5.42  | 3  | 3   | 553 | 60.5 | 9.17 |
| Q30201 | Hereditary hemochromatosis protein<br>OS=Homo sapiens<br>GN=HFE PE=1 SV=1 - [HFE_HUMAN]                                     | 3.45  | 1 | 1  | 1  | 4   | 1.354 | 1.034 | 0.899 | 1.574 | 10.49  | 3.45  | 2  | 4   | 348 | 40.1 | 6.60 |
| O75907 | Diacylglycerol O-acyltransferase 1<br>OS=Homo sapiens<br>GN=DGAT1<br>PE=1 SV=2 - [DGAT1_HUMAN]                              | 3.89  | 1 | 1  | 1  | 2   | 1.453 | 1.343 | 1.074 | 1.574 | 4.23   | 3.89  | 2  | 2   | 488 | 55.2 | 9.32 |
| P00750 | Tissue-type plasminogen activator<br>OS=Homo sapiens<br>GN=PLAT PE=1 SV=1 - [TPA_HUMAN]                                     | 21.00 | 1 | 11 | 11 | 27  | 2.347 | 0.556 | 1.050 | 1.575 | 67.17  | 21.00 | 17 | 27  | 562 | 62.9 | 7.80 |



|        |                                                                                                                |       |   |   |    |    |       |       |       |       |        |       |    |    |      |       |      |
|--------|----------------------------------------------------------------------------------------------------------------|-------|---|---|----|----|-------|-------|-------|-------|--------|-------|----|----|------|-------|------|
| P00167 | Cytochrome b5<br>OS=Homo sapiens<br>GN=CYB5A<br>PE=1 SV=2 - [CYB5_HUMAN]                                       | 47.01 | 1 | 5 | 5  | 28 | 1.651 | 0.743 | 0.874 | 1.575 | 77.95  | 47.01 | 9  | 28 | 134  | 15.3  | 4.96 |
| Q8NFV4 | Alpha/beta hydrolase domain-containing protein 11<br>OS=Homo sapiens<br>GN=ABHD11<br>PE=2 SV=1 - [ABHDB_HUMAN] | 16.83 | 1 | 5 | 5  | 10 | 1.043 | 1.369 | 1.445 | 1.575 | 12.96  | 16.83 | 7  | 10 | 315  | 34.7  | 9.48 |
| Q8IUW5 | RELT-like protein 1<br>OS=Homo sapiens<br>GN=RELL1<br>PE=1 SV=1 - [RELL1_HUMAN]                                | 9.23  | 1 | 2 | 2  | 13 | 1.695 | 0.914 | 0.538 | 1.576 | 30.33  | 9.23  | 4  | 13 | 271  | 29.3  | 8.34 |
| Q9Y4B4 | Helicase ARIP4<br>OS=Homo sapiens<br>GN=RAD54L2<br>PE=1 SV=4 - [ARIP4_HUMAN]                                   | 2.86  | 1 | 4 | 4  | 4  | 1.167 | 1.367 | 0.864 | 1.577 | 3.85   | 2.86  | 4  | 4  | 1467 | 162.7 | 6.09 |
| Q8IWT6 | Volume-regulated anion channel subunit LRRC8A<br>OS=Homo sapiens<br>GN=LRRC8A<br>PE=1 SV=1 - [LRC8A_HUMAN]     | 4.07  | 1 | 2 | 3  | 5  | 1.625 | 1.109 | 1.736 | 1.577 | 14.20  | 4.07  | 4  | 5  | 810  | 94.1  | 7.94 |
| O15533 | Tapasin<br>OS=Homo sapiens<br>GN=TAPBP<br>PE=1 SV=1 - [TPSN_HUMAN]                                             | 16.96 | 1 | 4 | 4  | 8  | 1.987 | 1.037 | 0.985 | 1.578 | 26.62  | 16.96 | 6  | 8  | 448  | 47.6  | 7.15 |
| P12236 | ADP/ATP translocase 3<br>OS=Homo sapiens<br>GN=SLC25A6<br>PE=1 SV=4 - [ADT3_HUMAN]                             | 51.34 | 2 | 4 | 18 | 94 | 2.424 | 1.219 | 1.234 | 1.578 | 197.18 | 51.34 | 29 | 94 | 298  | 32.8  | 9.74 |
| O60565 | Gremlin-1<br>OS=Homo sapiens<br>GN=GREM1<br>PE=1 SV=1 - [GREM1_HUMAN]                                          | 15.22 | 1 | 3 | 3  | 8  | 0.583 | 5.160 | 2.912 | 1.578 | 12.63  | 15.22 | 6  | 8  | 184  | 20.7  | 9.39 |
| O14525 | Astrotactin-1<br>OS=Homo sapiens<br>GN=ASTN1<br>PE=2 SV=3 - [ASTN1_HUMAN]                                      | 1.69  | 1 | 2 | 2  | 3  | 2.547 | 1.064 | 4.331 | 1.579 | 3.79   | 1.69  | 2  | 3  | 1302 | 144.8 | 5.24 |

|        |                                                                                                                                                         |       |   |    |    |    |       |       |       |       |        |       |    |    |      |       |      |
|--------|---------------------------------------------------------------------------------------------------------------------------------------------------------|-------|---|----|----|----|-------|-------|-------|-------|--------|-------|----|----|------|-------|------|
| O95429 | BAG family<br>molecular<br>chaperone<br>regulator 4<br>OS=Homo<br>sapiens<br>GN=BAG4<br>PE=1 SV=1 -<br>[BAG4_HUMAN]                                     | 14.44 | 1 | 3  | 4  | 22 | 1.453 | 0.858 | 1.241 | 1.580 | 70.77  | 14.44 | 5  | 22 | 457  | 49.6  | 5.12 |
| P04424 | Argininosuccina<br>te lyase<br>OS=Homo<br>sapiens<br>GN=ASL PE=1<br>SV=4 -<br>[ARLY_HUMAN]                                                              | 30.39 | 1 | 14 | 14 | 49 | 2.020 | 0.866 | 0.669 | 1.581 | 115.97 | 30.39 | 23 | 49 | 464  | 51.6  | 6.48 |
| P53634 | Dipeptidyl<br>peptidase 1<br>OS=Homo<br>sapiens<br>GN=CTSC<br>PE=1 SV=2 -<br>[CATC_HUMAN]                                                               | 31.32 | 1 | 10 | 10 | 69 | 1.518 | 0.528 | 0.680 | 1.581 | 247.65 | 31.32 | 14 | 69 | 463  | 51.8  | 6.99 |
| Q05901 | Neuronal<br>acetylcholine<br>receptor<br>subunit beta-3<br>OS=Homo<br>sapiens<br>GN=CHRB3<br>PE=2 SV=2 -<br>[ACHB3_HUMAN<br>]                           | 2.84  | 1 | 1  | 1  | 1  | 1.236 | 1.334 | 1.003 | 1.581 | 0.00   | 2.84  | 1  | 1  | 458  | 52.7  | 8.10 |
| Q6P179 | Endoplasmic<br>reticulum<br>aminopeptidas<br>e 2 OS=Homo<br>sapiens<br>GN=ERAP2<br>PE=1 SV=2 -<br>[ERAP2_HUMAN<br>]                                     | 6.35  | 1 | 7  | 7  | 12 | 1.908 | 1.279 | 1.619 | 1.582 | 20.75  | 6.35  | 10 | 12 | 960  | 110.4 | 6.71 |
| P35568 | Insulin<br>receptor<br>substrate 1<br>OS=Homo<br>sapiens<br>GN=IRS1 PE=1<br>SV=1 -<br>[IRS1_HUMAN]                                                      | 10.63 | 1 | 9  | 9  | 21 | 1.844 | 1.633 | 0.975 | 1.583 | 64.11  | 10.63 | 12 | 21 | 1242 | 131.5 | 8.54 |
| O00762 | Ubiquitin-<br>conjugating<br>enzyme E2 C<br>OS=Homo<br>sapiens<br>GN=UBE2C<br>PE=1 SV=1 -<br>[UBE2C_HUMAN<br>]                                          | 6.15  | 1 | 1  | 1  | 1  | 1.004 | 0.920 | 0.819 | 1.583 | 2.17   | 6.15  | 1  | 1  | 179  | 19.6  | 7.37 |
| Q13939 | Calicin<br>OS=Homo<br>sapiens<br>GN=CCIN PE=2<br>SV=3 -<br>[CALL_HUMAN]                                                                                 | 2.21  | 1 | 1  | 1  | 1  | 0.984 | 1.226 | 1.154 | 1.583 | 0.00   | 2.21  | 1  | 1  | 588  | 66.5  | 8.18 |
| P0CW20 | LIM and<br>senescent cell<br>antigen-like-<br>containing<br>domain protein<br>3-like<br>OS=Homo<br>sapiens<br>GN=LIMS3L<br>PE=3 SV=1 -<br>[LIM3L_HUMAN] | 25.64 | 1 | 2  | 2  | 17 | 0.737 | 1.059 | 1.180 | 1.584 | 43.26  | 25.64 | 4  | 17 | 117  | 13.2  | 5.49 |

|        |                                                                                                        |       |   |   |    |    |       |       |       |       |       |       |    |    |     |      |       |
|--------|--------------------------------------------------------------------------------------------------------|-------|---|---|----|----|-------|-------|-------|-------|-------|-------|----|----|-----|------|-------|
| P13984 | General transcription factor IIF subunit 2<br>OS=Homo sapiens<br>GN=GTF2F2<br>PE=1 SV=2 - [T2FB_HUMAN] | 45.78 | 1 | 7 | 8  | 27 | 1.711 | 1.243 | 0.940 | 1.584 | 56.46 | 45.78 | 13 | 27 | 249 | 28.4 | 9.23  |
| Q9Y4J8 | Dystrobrevin alpha<br>OS=Homo sapiens<br>GN=DTNA<br>PE=1 SV=2 - [DTNA_HUMAN]                           | 9.42  | 1 | 3 | 6  | 12 | 0.750 | 3.613 | 1.141 | 1.587 | 26.23 | 9.42  | 8  | 12 | 743 | 83.8 | 6.89  |
| Q96FM4 | Copine-2<br>OS=Homo sapiens<br>GN=CPNE2<br>PE=1 SV=3 - [CPNE2_HUMAN]                                   | 3.28  | 4 | 1 | 2  | 12 | 1.117 | 2.625 | 1.449 | 1.588 | 29.97 | 3.28  | 2  | 12 | 548 | 61.2 | 6.07  |
| P50897 | Palmitoyl-protein thioesterase 1<br>OS=Homo sapiens<br>GN=PPT1<br>PE=1 SV=1 - [PPT1_HUMAN]             | 33.33 | 1 | 9 | 9  | 24 | 1.580 | 1.174 | 0.846 | 1.588 | 57.47 | 33.33 | 13 | 24 | 306 | 34.2 | 6.52  |
| Q8TEQ0 | Sorting nexin-29<br>OS=Homo sapiens<br>GN=SNX29<br>PE=1 SV=3 - [SNX29_HUMAN]                           | 13.90 | 2 | 9 | 10 | 18 | 1.302 | 0.843 | 0.937 | 1.589 | 33.65 | 13.90 | 11 | 18 | 813 | 91.2 | 6.21  |
| Q9UNZ5 | Leydig cell tumor 10 kDa protein homolog<br>OS=Homo sapiens<br>GN=C19orf53<br>PE=1 SV=1 - [L10K_HUMAN] | 17.17 | 1 | 3 | 3  | 3  | 0.981 | 1.399 | 0.843 | 1.589 | 2.48  | 17.17 | 3  | 3  | 99  | 10.6 | 11.55 |
| P06280 | Alpha-galactosidase A<br>OS=Homo sapiens<br>GN=GLA PE=1 SV=1 - [AGAL_HUMAN]                            | 15.85 | 1 | 6 | 6  | 22 | 1.346 | 0.817 | 0.967 | 1.590 | 54.80 | 15.85 | 8  | 22 | 429 | 48.7 | 5.60  |
| Q4G0M1 | Erythroferrone<br>OS=Homo sapiens<br>GN=FAM132B<br>PE=2 SV=2 - [ERFE_HUMAN]                            | 3.95  | 1 | 1 | 1  | 1  | 0.768 | 0.806 | 0.834 | 1.590 | 0.00  | 3.95  | 1  | 1  | 354 | 37.3 | 9.83  |
| Q9UI47 | Catenin alpha-3<br>OS=Homo sapiens<br>GN=CTNNA3<br>PE=1 SV=2 - [CTNA3_HUMAN]                           | 3.69  | 1 | 1 | 2  | 2  | 2.874 | 0.646 | 0.989 | 1.592 | 5.14  | 3.69  | 2  | 2  | 895 | 99.7 | 6.16  |

|        |                                                                                                           |       |   |   |   |    |       |       |       |       |       |       |    |    |      |       |      |
|--------|-----------------------------------------------------------------------------------------------------------|-------|---|---|---|----|-------|-------|-------|-------|-------|-------|----|----|------|-------|------|
| P20585 | DNA mismatch repair protein Msh3<br>OS=Homo sapiens<br>GN=MSH3<br>PE=1 SV=4 - [MSH3_HUMAN]                | 0.79  | 1 | 1 | 1 | 8  | 1.010 | 0.832 | 0.837 | 1.593 | 23.47 | 0.79  | 1  | 8  | 1137 | 127.3 | 8.02 |
| Q9H875 | PRKR-interacting protein 1<br>OS=Homo sapiens<br>GN=PRKRIP1<br>PE=1 SV=1 - [PKRI1_HUMAN]                  | 4.89  | 1 | 1 | 1 | 4  | 0.795 | 1.131 | 1.214 | 1.593 | 10.35 | 4.89  | 2  | 4  | 184  | 21.0  | 9.79 |
| P07451 | Carbonic anhydrase 3<br>OS=Homo sapiens<br>GN=CA3 PE=1 SV=3 - [CAH3_HUMAN]                                | 3.46  | 1 | 1 | 1 | 1  | 0.900 | 1.722 | 1.210 | 1.593 | 2.47  | 3.46  | 1  | 1  | 260  | 29.5  | 7.34 |
| Q96SB8 | Structural maintenance of chromosomes protein 6<br>OS=Homo sapiens<br>GN=SMC6<br>PE=1 SV=2 - [SMC6_HUMAN] | 2.29  | 1 | 3 | 3 | 7  | 1.118 | 1.047 | 1.063 | 1.593 | 11.90 | 2.29  | 3  | 7  | 1091 | 126.2 | 6.99 |
| O95983 | Methyl-CpG-binding domain protein 3<br>OS=Homo sapiens<br>GN=MBD3<br>PE=1 SV=1 - [MBD3_HUMAN]             | 8.59  | 1 | 2 | 3 | 5  | 0.886 | 1.554 | 1.334 | 1.594 | 5.56  | 8.59  | 4  | 5  | 291  | 32.8  | 5.34 |
| Q9NU22 | Midasin<br>OS=Homo sapiens<br>GN=MDN1<br>PE=1 SV=2 - [MDN1_HUMAN]                                         | 0.55  | 1 | 3 | 4 | 9  | 0.824 | 1.063 | 1.048 | 1.594 | 17.89 | 0.55  | 6  | 9  | 5596 | 632.4 | 5.68 |
| Q8WVX9 | Fatty acyl-CoA reductase 1<br>OS=Homo sapiens<br>GN=FAR1<br>PE=1 SV=1 - [FACR1_HUMAN]                     | 4.08  | 1 | 2 | 2 | 4  | 0.772 | 0.847 | 1.113 | 1.595 | 6.01  | 4.08  | 3  | 4  | 515  | 59.3  | 9.17 |
| P35270 | Sepiapterin reductase<br>OS=Homo sapiens<br>GN=SPR PE=1 SV=1 - [SPRE_HUMAN]                               | 33.72 | 1 | 8 | 8 | 29 | 1.670 | 0.866 | 1.071 | 1.596 | 65.50 | 33.72 | 13 | 29 | 261  | 28.0  | 8.05 |
| O00522 | Krev interaction trapped protein 1<br>OS=Homo sapiens<br>GN=KRIT1<br>PE=1 SV=2 -                          | 2.17  | 1 | 2 | 2 | 2  | 0.929 | 1.165 | 1.161 | 1.596 | 3.95  | 2.17  | 2  | 2  | 736  | 84.3  | 8.41 |

|        |                                                                                                                              |       |   |   |   |    |       |       |       |       |       |       |   |    |      |       |      |
|--------|------------------------------------------------------------------------------------------------------------------------------|-------|---|---|---|----|-------|-------|-------|-------|-------|-------|---|----|------|-------|------|
| Q9Y5J7 | Mitochondrial import inner membrane translocase subunit Tim9<br>OS=Homo sapiens<br>GN=TIMM9<br>PE=1 SV=1 - [TIM9_HUMAN]      | 29.21 | 1 | 3 | 3 | 11 | 1.252 | 1.351 | 1.488 | 1.597 | 29.76 | 29.21 | 5 | 11 | 89   | 10.4  | 7.21 |
| P98173 | Protein FAM3A<br>OS=Homo sapiens<br>GN=FAM3A<br>PE=1 SV=2 - [FAM3A_HUMAN]                                                    | 3.48  | 1 | 1 | 1 | 1  | 1.249 | 1.283 | 1.262 | 1.597 | 2.37  | 3.48  | 1 | 1  | 230  | 25.1  | 8.68 |
| Q9Y6R1 | Electrogenic sodium bicarbonate cotransporter 1<br>OS=Homo sapiens<br>GN=SLC4A4<br>PE=1 SV=1 - [S4A4_HUMAN]                  | 4.91  | 2 | 4 | 5 | 7  | 2.067 | 0.186 | 0.518 | 1.597 | 19.25 | 4.91  | 6 | 7  | 1079 | 121.4 | 6.80 |
| Q8TDI7 | Transmembrane channel-like protein 2<br>OS=Homo sapiens<br>GN=TMC2<br>PE=2 SV=3 - [TMC2_HUMAN]                               | 0.88  | 1 | 1 | 1 | 5  | 0.927 | 1.303 | 0.662 | 1.598 | 8.24  | 0.88  | 1 | 5  | 906  | 102.5 | 9.47 |
| O43505 | Beta-1,4-glucuronyltransferase 1<br>OS=Homo sapiens<br>GN=B3GNT1<br>PE=1 SV=1 - [B4GA1_HUMAN]                                | 3.86  | 1 | 1 | 1 | 5  | 1.158 | 1.062 | 0.900 | 1.599 | 10.96 | 3.86  | 2 | 5  | 415  | 47.1  | 7.20 |
| P82970 | High mobility group nucleosome-binding domain-containing protein 5<br>OS=Homo sapiens<br>GN=HMG5<br>PE=1 SV=1 - [HMG5_HUMAN] | 3.19  | 1 | 1 | 1 | 1  | 0.705 | 1.286 | 1.334 | 1.600 | 2.72  | 3.19  | 1 | 1  | 282  | 31.5  | 4.55 |
| O00124 | UBX domain-containing protein 8<br>OS=Homo sapiens<br>GN=UBXN8<br>PE=1 SV=2 - [UBXN8_HUMAN]                                  | 6.30  | 1 | 1 | 1 | 2  |       |       |       | 1.606 | 8.57  | 6.30  | 1 | 2  | 270  | 30.5  | 7.78 |
| Q8N655 | Uncharacterized protein C10orf12<br>OS=Homo sapiens<br>GN=C10orf12<br>PE=1 SV=1 - [C1012_HUMAN]                              | 2.17  | 1 | 3 | 3 | 3  | 1.084 | 0.603 | 0.908 | 1.606 | 6.08  | 2.17  | 3 | 3  | 1247 | 137.1 | 8.24 |

|        |                                                                                                                                                |       |   |    |    |     |       |       |       |       |        |       |    |     |     |      |      |
|--------|------------------------------------------------------------------------------------------------------------------------------------------------|-------|---|----|----|-----|-------|-------|-------|-------|--------|-------|----|-----|-----|------|------|
| P30533 | Alpha-2-macroglobulin receptor-associated protein<br>OS=Homo sapiens<br>GN=LRPAP1<br>PE=1 SV=1 - [AMRP_HUMAN]                                  | 48.18 | 2 | 25 | 26 | 152 | 1.331 | 1.133 | 1.221 | 1.606 | 416.54 | 48.18 | 38 | 152 | 357 | 41.4 | 8.78 |
| O75626 | PR domain zinc finger protein 1<br>OS=Homo sapiens<br>GN=PRDM1<br>PE=1 SV=2 - [PRDM1_HUMAN]                                                    | 2.18  | 1 | 2  | 2  | 2   | 1.211 | 1.565 | 1.553 | 1.609 | 2.05   | 2.18  | 2  | 2   | 825 | 91.7 | 8.48 |
| P10914 | Interferon regulatory factor 1<br>OS=Homo sapiens<br>GN=IRF1 PE=1 SV=2 - [IRF1_HUMAN]                                                          | 10.15 | 1 | 2  | 2  | 4   | 1.085 | 1.339 | 1.073 | 1.610 | 5.03   | 10.15 | 2  | 4   | 325 | 36.5 | 5.39 |
| Q9UNQ2 | Probable dimethyladenosine transferase<br>OS=Homo sapiens<br>GN=DIMT1<br>PE=1 SV=1 - [DIM1_HUMAN]                                              | 2.24  | 1 | 1  | 1  | 1   | 0.722 | 0.703 | 0.507 | 1.610 | 2.52   | 2.24  | 1  | 1   | 313 | 35.2 | 9.99 |
| O60658 | High affinity cAMP-specific and IBMX-insensitive 3',5'-cyclic phosphodiesterase 8A<br>OS=Homo sapiens<br>GN=PDE8A<br>PE=1 SV=2 - [PDE8A_HUMAN] | 2.65  | 1 | 2  | 2  | 3   | 2.338 | 1.429 | 1.147 | 1.610 | 2.04   | 2.65  | 3  | 3   | 829 | 93.2 | 6.11 |
| P54284 | Voltage-dependent L-type calcium channel subunit beta-3<br>OS=Homo sapiens<br>GN=CACNB3<br>PE=1 SV=1 - [CACB3_HUMAN]                           | 14.88 | 3 | 4  | 6  | 22  | 1.715 | 1.477 | 1.126 | 1.612 | 56.83  | 14.88 | 9  | 22  | 484 | 54.5 | 6.35 |
| P15559 | NAD(P)H dehydrogenase [quinone] 1<br>OS=Homo sapiens<br>GN=NQO1<br>PE=1 SV=1 - [NQO1_HUMAN]                                                    | 45.26 | 1 | 15 | 15 | 254 | 1.792 | 0.537 | 0.796 | 1.612 | 693.17 | 45.26 | 26 | 254 | 274 | 30.8 | 8.88 |

|        |                                                                                                                           |       |   |   |   |    |       |       |       |       |       |       |    |    |     |      |      |
|--------|---------------------------------------------------------------------------------------------------------------------------|-------|---|---|---|----|-------|-------|-------|-------|-------|-------|----|----|-----|------|------|
| P31321 | cAMP-dependent protein kinase type I-beta regulatory subunit<br>OS=Homo sapiens<br>GN=PRKAR1B<br>PE=1 SV=4 - [KAP1_HUMAN] | 22.05 | 1 | 4 | 7 | 14 | 1.981 | 0.652 | 0.865 | 1.612 | 38.93 | 22.05 | 8  | 14 | 381 | 43.0 | 5.71 |
| Q7Z4T9 | Protein MAATS1<br>OS=Homo sapiens<br>GN=MAATS1<br>PE=1 SV=2 - [MAAT1_HUMAN]                                               | 2.32  | 1 | 1 | 1 | 1  | 1.362 | 0.998 | 1.194 | 1.613 | 2.67  | 2.32  | 1  | 1  | 603 | 71.0 | 7.74 |
| Q5QJE6 | Deoxynucleotidyltransferase terminal-interacting protein 2<br>OS=Homo sapiens<br>GN=DNTTIP2<br>PE=1 SV=2 - [TDIF2_HUMAN]  | 8.47  | 2 | 4 | 5 | 21 | 0.875 | 1.184 | 0.829 | 1.613 | 47.32 | 8.47  | 8  | 21 | 756 | 84.4 | 6.16 |
| Q6BCY4 | NADH-cytochrome b5 reductase 2<br>OS=Homo sapiens<br>GN=CYB5R2<br>PE=1 SV=1 - [NBSR2_HUMAN]                               | 32.97 | 1 | 7 | 8 | 19 | 0.823 | 0.480 | 0.929 | 1.613 | 24.20 | 32.97 | 13 | 19 | 276 | 31.4 | 8.50 |
| P69905 | Hemoglobin subunit alpha<br>OS=Homo sapiens<br>GN=HBA1<br>PE=1 SV=2 - [HBA_HUMAN]                                         | 21.83 | 1 | 2 | 2 | 6  | 1.415 | 0.677 | 0.809 | 1.614 | 7.08  | 21.83 | 3  | 6  | 142 | 15.2 | 8.68 |
| O95801 | Tetratricopeptide repeat protein 4<br>OS=Homo sapiens<br>GN=TTC4<br>PE=1 SV=3 - [TTC4_HUMAN]                              | 2.58  | 1 | 1 | 1 | 3  | 0.736 | 1.129 | 1.486 | 1.615 | 4.10  | 2.58  | 2  | 3  | 387 | 44.7 | 5.60 |
| P22607 | Fibroblast growth factor receptor 3<br>OS=Homo sapiens<br>GN=FGFR3<br>PE=1 SV=1 - [FGFR3_HUMAN]                           | 6.08  | 7 | 1 | 3 | 13 | 1.045 | 1.043 | 0.868 | 1.616 | 22.65 | 6.08  | 4  | 13 | 806 | 87.7 | 5.90 |
| P38435 | Vitamin K-dependent gamma-carboxylase<br>OS=Homo sapiens<br>GN=GGCX<br>PE=1 SV=2 - [VKGC_HUMAN]                           | 9.50  | 1 | 7 | 7 | 22 | 1.243 | 0.782 | 0.735 | 1.616 | 56.13 | 9.50  | 12 | 22 | 758 | 87.5 | 8.02 |

|        |                                                                                                                                 |       |   |    |    |    |       |       |       |       |       |       |    |     |       |       |      |
|--------|---------------------------------------------------------------------------------------------------------------------------------|-------|---|----|----|----|-------|-------|-------|-------|-------|-------|----|-----|-------|-------|------|
| Q6ZN66 | Guanylate-binding protein<br>6 OS=Homo sapiens<br>GN=GBP6<br>PE=2 SV=1 - [GBP6_HUMAN]                                           | 3.79  | 1 | 1  | 2  | 2  | 2.329 | 0.403 | 0.857 | 1.617 | 2.59  | 3.79  | 2  | 2   | 633   | 72.4  | 6.37 |
| P12004 | Proliferating cell nuclear antigen<br>OS=Homo sapiens<br>GN=PCNA<br>PE=1 SV=1 - [PCNA_HUMAN]                                    | 40.61 | 1 | 9  | 9  | 37 | 1.169 | 1.131 | 0.886 | 1.619 | 70.43 | 40.61 | 14 | 37  | 261   | 28.8  | 4.69 |
| Q9H0E9 | Bromodomain-containing protein 8<br>OS=Homo sapiens<br>GN=BRD8<br>PE=1 SV=2 - [BRD8_HUMAN]                                      | 2.35  | 1 | 2  | 3  | 5  | 1.523 | 1.107 | 1.230 | 1.619 | 9.86  | 2.35  | 3  | 5   | 1235  | 135.3 | 4.60 |
| P50613 | Cyclin-dependent kinase 7<br>OS=Homo sapiens<br>GN=CDK7<br>PE=1 SV=1 - [CDK7_HUMAN]                                             | 7.23  | 1 | 2  | 3  | 6  | 1.327 | 1.200 | 1.093 | 1.619 | 10.14 | 7.23  | 5  | 6   | 346   | 39.0  | 8.47 |
| Q8NFP4 | MAM domain-containing glycosylphosphatidylinositol anchor protein 1<br>OS=Homo sapiens<br>GN=MDGA1<br>PE=1 SV=1 - [MDGA1_HUMAN] | 1.15  | 1 | 1  | 1  | 1  | 0.910 | 2.514 | 1.621 | 0.00  | 1.15  | 1     | 1  | 955 | 105.7 | 8.34  |      |
| Q96RE7 | Nucleus accumbens-associated protein 1<br>OS=Homo sapiens<br>GN=NACC1<br>PE=1 SV=1 - [NACC1_HUMAN]                              | 9.11  | 1 | 3  | 3  | 8  | 1.034 | 0.833 | 0.959 | 1.621 | 16.42 | 9.11  | 4  | 8   | 527   | 57.2  | 5.74 |
| Q9UIG0 | Tyrosine-protein kinase BAZ1B<br>OS=Homo sapiens<br>GN=BAZ1B<br>PE=1 SV=2 - [BAZ1B_HUMAN]                                       | 6.54  | 1 | 11 | 12 | 36 | 1.168 | 1.343 | 0.899 | 1.621 | 80.30 | 6.54  | 19 | 36  | 1483  | 170.8 | 8.48 |
| Q8WUY1 | Protein THEM6<br>OS=Homo sapiens<br>GN=THEM6<br>PE=1 SV=2 - [THEM6_HUMAN]                                                       | 14.42 | 1 | 3  | 3  | 7  | 1.602 | 0.829 | 0.574 | 1.622 | 18.12 | 14.42 | 4  | 7   | 208   | 23.8  | 9.55 |
| O14763 | Tumor necrosis factor receptor superfamily member 10B<br>OS=Homo sapiens<br>GN=TNFRSF10B<br>PE=1 SV=2 - [TR10B_HUMAN]           | 3.41  | 1 | 1  | 1  | 3  | 1.663 | 1.583 | 1.644 | 1.623 | 3.15  | 3.41  | 2  | 3   | 440   | 47.8  | 5.55 |



|        |                                                                                                                         |       |   |   |   |   |       |       |       |       |       |       |   |   |      |       |      |
|--------|-------------------------------------------------------------------------------------------------------------------------|-------|---|---|---|---|-------|-------|-------|-------|-------|-------|---|---|------|-------|------|
| P52823 | Stanniocalcin-1<br>OS=Homo sapiens<br>GN=STC1<br>PE=1 SV=1 - [STC1_HUMAN]                                               | 5.67  | 1 | 1 | 1 | 1 | 2.593 | 0.695 | 0.957 | 1.624 | 4.77  | 5.67  | 1 | 1 | 247  | 27.6  | 7.99 |
| Q63ZY6 | Putative methyltransferase NSUN5C<br>OS=Homo sapiens<br>GN=NSUN5P2<br>PE=5 SV=2 - [NSUN5C_HUMAN]                        | 11.75 | 2 | 2 | 3 | 4 | 0.908 | 1.382 | 1.372 | 1.627 | 9.97  | 11.75 | 4 | 4 | 315  | 34.3  | 8.68 |
| Q13099 | Intraflagellar transport protein 88 homolog<br>OS=Homo sapiens<br>GN=IFT88<br>PE=2 SV=2 - [IFT88_HUMAN]                 | 1.80  | 1 | 1 | 2 | 2 | 1.034 | 2.896 | 4.823 | 1.627 | 2.47  | 1.80  | 2 | 2 | 833  | 94.2  | 6.54 |
| O14526 | FCH domain only protein 1<br>OS=Homo sapiens<br>GN=FCHO1<br>PE=1 SV=2 - [FCHO1_HUMAN]                                   | 3.37  | 2 | 1 | 4 | 8 | 2.140 | 2.142 | 2.740 | 1.629 | 10.47 | 3.37  | 4 | 8 | 889  | 96.8  | 6.96 |
| Q9H0R6 | Glutamyl-tRNA(Gln) amidotransferase subunit A, mitochondrial<br>OS=Homo sapiens<br>GN=QRSL1<br>PE=1 SV=2 - [GATA_HUMAN] | 5.49  | 1 | 2 | 2 | 8 | 0.658 | 1.311 | 1.010 | 1.630 | 22.13 | 5.49  | 4 | 8 | 528  | 57.4  | 5.68 |
| Q5T7V8 | RAB6-interacting golgin<br>OS=Homo sapiens<br>GN=GORAB<br>PE=1 SV=1 - [GORAB_HUMAN]                                     | 4.82  | 1 | 2 | 2 | 4 | 1.286 | 0.973 | 0.924 | 1.632 | 7.50  | 4.82  | 2 | 4 | 394  | 45.0  | 7.08 |
| Q5VUA4 | Zinc finger protein 318<br>OS=Homo sapiens<br>GN=ZNF318<br>PE=1 SV=2 - [ZNF318_HUMAN]                                   | 1.10  | 1 | 2 | 2 | 2 | 1.291 | 1.443 | 1.326 | 1.634 | 2.20  | 1.10  | 2 | 2 | 2279 | 251.0 | 7.20 |
| P36955 | Pigment epithelium-derived factor<br>OS=Homo sapiens<br>GN=SERPINF1<br>PE=1 SV=4 - [PEDF_HUMAN]                         | 2.39  | 1 | 1 | 1 | 4 | 1.047 | 2.070 | 0.728 | 1.635 | 9.71  | 2.39  | 2 | 4 | 418  | 46.3  | 6.38 |
| O60938 | Keratocan<br>OS=Homo sapiens<br>GN=KERA<br>PE=1 SV=1 - [KERA_HUMAN]                                                     | 2.56  | 1 | 1 | 1 | 1 | 1.526 | 2.305 | 1.422 | 1.635 | 2.48  | 2.56  | 1 | 1 | 352  | 40.5  | 7.47 |

|        |                                                                                                                         |       |    |    |    |    |       |       |       |       |        |       |    |    |      |       |      |
|--------|-------------------------------------------------------------------------------------------------------------------------|-------|----|----|----|----|-------|-------|-------|-------|--------|-------|----|----|------|-------|------|
| P49790 | Nuclear pore complex protein Nup153<br>OS=Homo sapiens<br>GN=NUP153<br>PE=1 SV=2 - [NUP153_HUMAN]                       | 16.00 | 1  | 19 | 19 | 45 | 1.156 | 1.185 | 0.988 | 1.635 | 107.97 | 16.00 | 29 | 45 | 1475 | 153.8 | 8.73 |
| O95696 | Bromodomain-containing protein 1<br>OS=Homo sapiens<br>GN=BRD1<br>PE=1 SV=1 - [BRD1_HUMAN]                              | 1.89  | 4  | 1  | 3  | 3  | 1.259 | 1.325 | 1.738 | 1.635 | 2.09   | 1.89  | 3  | 3  | 1058 | 119.4 | 8.60 |
| Q9BX82 | Zinc finger protein 471<br>OS=Homo sapiens<br>GN=ZNF471<br>PE=2 SV=1 - [ZNF471_HUMAN]                                   | 6.39  | 94 | 1  | 2  | 3  | 0.375 | 0.751 | 1.819 | 1.636 | 0.00   | 6.39  | 2  | 3  | 626  | 73.0  | 8.56 |
| Q8WV22 | Non-structural maintenance of chromosomes element 1 homolog<br>OS=Homo sapiens<br>GN=NSMCE1<br>PE=1 SV=5 - [NSE1_HUMAN] | 9.02  | 1  | 3  | 3  | 3  | 0.998 | 1.117 | 1.128 | 1.638 | 5.86   | 9.02  | 3  | 3  | 266  | 30.8  | 7.47 |
| O00463 | TNF receptor-associated factor 5<br>OS=Homo sapiens<br>GN=TRAF5<br>PE=1 SV=2 - [TRAF5_HUMAN]                            | 2.15  | 1  | 1  | 1  | 1  | 1.572 | 0.915 | 1.088 | 1.639 | 3.18   | 2.15  | 1  | 1  | 557  | 64.4  | 7.43 |
| Q93096 | Protein tyrosine phosphatase type IVA 1<br>OS=Homo sapiens<br>GN=PTP4A1<br>PE=1 SV=2 - [TP4A1_HUMAN]                    | 23.70 | 1  | 1  | 4  | 18 | 1.092 | 0.761 | 1.103 | 1.639 | 25.36  | 23.70 | 7  | 18 | 173  | 19.8  | 8.97 |
| Q15723 | ETS-related transcription factor E1f-2<br>OS=Homo sapiens<br>GN=ELF2 PE=1 SV=2 - [ELF2_HUMAN]                           | 3.20  | 3  | 2  | 2  | 2  | 1.092 | 1.442 | 1.059 | 1.640 | 2.51   | 3.20  | 2  | 2  | 593  | 63.9  | 6.57 |
| P07332 | Tyrosine-protein kinase Fes/Fps<br>OS=Homo sapiens<br>GN=FES PE=1 SV=3 - [FES_HUMAN]                                    | 2.31  | 1  | 1  | 1  | 1  | 1.739 | 1.811 | 1.203 | 1.644 | 0.00   | 2.31  | 1  | 1  | 822  | 93.4  | 6.73 |
| Q9UDX5 | Mitochondrial fission process protein 1<br>OS=Homo sapiens<br>GN=MTFP1<br>PE=1 SV=1 - [MTFP1_HUMAN]                     | 7.23  | 1  | 1  | 1  | 2  | 1.253 | 1.216 | 0.507 | 1.646 | 0.00   | 7.23  | 2  | 2  | 166  | 18.0  | 9.31 |

|        |                                                                                                                                      |       |   |    |    |    |       |       |       |       |       |       |    |    |      |       |      |
|--------|--------------------------------------------------------------------------------------------------------------------------------------|-------|---|----|----|----|-------|-------|-------|-------|-------|-------|----|----|------|-------|------|
| Q6LXI7 | Vitrin<br>OS=Homo sapiens<br>GN=VIT PE=2<br>SV=1 -<br>[VITRN_HUMAN<br>]<br>Coiled-coil<br>domain-<br>containing<br>protein 12        | 2.21  | 1 | 1  | 1  | 1  | 1.460 | 0.782 | 0.636 | 1.646 | 0.00  | 2.21  | 1  | 1  | 678  | 73.9  | 9.20 |
| Q8WUD4 | OS=Homo sapiens<br>GN=CCDC12<br>PE=1 SV=1 -<br>[CCDC12_HUMAN<br>]<br>Laminin subunit<br>beta-3                                       | 30.72 | 1 | 2  | 3  | 3  | 1.383 | 3.568 | 1.022 | 1.647 | 8.29  | 30.72 | 3  | 3  | 166  | 19.2  | 7.34 |
| Q13751 | OS=Homo sapiens<br>GN=LAMB3<br>PE=1 SV=1 -<br>[LAMB3_HUMAN<br>]<br>Mini-<br>chromosome<br>maintenance<br>complex-<br>binding protein | 2.82  | 1 | 2  | 2  | 3  | 1.311 | 1.178 | 1.654 | 1.648 | 0.00  | 2.82  | 2  | 3  | 1172 | 129.5 | 7.21 |
| Q9BTE3 | OS=Homo sapiens<br>GN=MCMBP<br>PE=1 SV=2 -<br>[MCMBP_HUMAN<br>]<br>NAD-<br>dependent<br>protein<br>deacetylase                       | 10.59 | 1 | 6  | 6  | 16 | 0.976 | 1.482 | 1.176 | 1.650 | 28.32 | 10.59 | 11 | 16 | 642  | 72.9  | 5.87 |
| Q8N6T7 | sirtuin-6<br>OS=Homo sapiens<br>GN=SIRT6<br>PE=1 SV=2 -<br>[SIRT6_HUMAN<br>]                                                         | 6.48  | 1 | 2  | 2  | 3  | 0.598 | 0.863 | 0.854 | 1.651 | 8.08  | 6.48  | 2  | 3  | 355  | 39.1  | 9.19 |
| P20719 | Homeobox<br>protein Hox-A5<br>OS=Homo sapiens<br>GN=HOXA5<br>PE=1 SV=2 -<br>[HXA5_HUMAN<br>]                                         | 9.26  | 1 | 1  | 1  | 1  | 2.386 | 0.571 |       | 1.651 | 2.41  | 9.26  | 1  | 1  | 270  | 29.3  | 9.25 |
| Q7Z6I8 | UPF0461<br>protein<br>C5orf24<br>OS=Homo sapiens<br>GN=C5orf24<br>PE=1 SV=1 -<br>[CE024_HUMAN<br>]                                   | 5.85  | 1 | 1  | 1  | 1  | 2.039 | 1.457 | 1.524 | 1.654 | 0.00  | 5.85  | 1  | 1  | 188  | 20.1  | 9.85 |
| Q03181 | Peroxisome<br>proliferator-<br>activated<br>receptor delta<br>OS=Homo sapiens<br>GN=PPARD<br>PE=1 SV=1 -<br>[PPARD_HUMAN<br>]        | 1.59  | 1 | 1  | 1  | 8  | 1.412 | 0.973 | 1.194 | 1.654 | 22.00 | 1.59  | 2  | 8  | 441  | 49.9  | 7.59 |
| Q8IXS6 | Paralemmin-2<br>OS=Homo sapiens<br>GN=PALM2<br>PE=2 SV=3 -<br>[PALM2_HUMAN<br>]                                                      | 34.30 | 1 | 12 | 12 | 41 | 1.198 | 1.008 | 1.393 | 1.655 | 73.65 | 34.30 | 22 | 41 | 379  | 42.2  | 5.10 |

|        |                                                                                                                         |       |   |    |    |    |       |       |       |       |        |       |    |     |      |       |      |
|--------|-------------------------------------------------------------------------------------------------------------------------|-------|---|----|----|----|-------|-------|-------|-------|--------|-------|----|-----|------|-------|------|
| Q8NA31 | Telomere repeats-binding bouquet formation protein 1<br>OS=Homo sapiens<br>GN=CCDC79<br>PE=2 SV=3 - [TERB1_HUMAN]       | 1.65  | 1 | 1  | 1  | 2  | 1.623 | 0.906 | 1.657 | 2.89  | 1.65   | 1     | 2  | 727 | 83.0 | 7.46  |      |
| Q9ULE3 | DENN domain-containing protein 2A<br>OS=Homo sapiens<br>GN=DENND2A<br>PE=2 SV=4 - [DEN2A_HUMAN]                         | 17.94 | 2 | 13 | 17 | 51 | 2.596 | 0.886 | 0.604 | 1.658 | 141.61 | 17.94 | 23 | 51  | 1009 | 113.8 | 8.95 |
| Q15599 | Na(+)/H(+) exchange regulatory cofactor NHE-RF2<br>OS=Homo sapiens<br>GN=SLC9A3R2<br>PE=1 SV=2 - [NHRF2_HUMAN]          | 43.92 | 1 | 13 | 13 | 40 | 1.764 | 0.692 | 0.949 | 1.658 | 91.17  | 43.92 | 22 | 40  | 337  | 37.4  | 7.93 |
| P43246 | DNA mismatch repair protein Msh2<br>OS=Homo sapiens<br>GN=MSH2<br>PE=1 SV=1 - [MSH2_HUMAN]                              | 12.31 | 1 | 10 | 11 | 23 | 1.326 | 1.171 | 0.854 | 1.659 | 51.57  | 12.31 | 19 | 23  | 934  | 104.7 | 5.77 |
| Q96HP0 | Dedicator of cytokinesis protein 6<br>OS=Homo sapiens<br>GN=DOCK6<br>PE=1 SV=3 - [DOCK6_HUMAN]                          | 7.62  | 1 | 10 | 13 | 33 | 1.057 | 1.113 | 1.362 | 1.660 | 96.64  | 7.62  | 17 | 33  | 2047 | 229.4 | 6.74 |
| P07711 | Cathepsin L1<br>OS=Homo sapiens<br>GN=CTSL<br>PE=1 SV=2 - [CATL1_HUMAN]                                                 | 20.72 | 2 | 7  | 8  | 28 | 0.756 | 0.810 | 0.801 | 1.660 | 74.30  | 20.72 | 14 | 28  | 333  | 37.5  | 5.45 |
| Q9UIL8 | PHD finger protein 11<br>OS=Homo sapiens<br>GN=PHF11<br>PE=1 SV=3 - [PHF11_HUMAN]                                       | 3.63  | 1 | 1  | 1  | 1  | 1.288 | 1.420 | 1.513 | 1.660 | 2.53   | 3.63  | 1  | 1   | 331  | 37.6  | 7.72 |
| P33316 | Deoxyuridine 5'-triphosphate nucleotidohydrolase, mitochondrial<br>OS=Homo sapiens<br>GN=DUT<br>PE=1 SV=4 - [DUT_HUMAN] | 21.43 | 1 | 4  | 4  | 33 | 1.246 | 1.441 | 1.077 | 1.662 | 91.19  | 21.43 | 7  | 33  | 252  | 26.5  | 9.36 |

|        |                                                                                                         |       |   |   |   |    |       |       |       |       |       |       |    |    |      |       |      |
|--------|---------------------------------------------------------------------------------------------------------|-------|---|---|---|----|-------|-------|-------|-------|-------|-------|----|----|------|-------|------|
| Q6XQN6 | Nicotinate phosphoribosyltransferase<br>OS=Homo sapiens<br>GN=NAPRT<br>PE=1 SV=2 - [PNCB_HUMAN]         | 12.64 | 1 | 6 | 6 | 18 | 2.132 | 1.429 | 1.664 | 1.663 | 38.72 | 12.64 | 10 | 18 | 538  | 57.5  | 5.68 |
| Q9UBP6 | tRNA (guanine-N(7)-)-methyltransferase<br>OS=Homo sapiens<br>GN=METTL1<br>PE=1 SV=1 - [TRMB_HUMAN]      | 7.61  | 1 | 2 | 2 | 8  | 1.320 | 1.595 | 1.221 | 1.663 | 28.08 | 7.61  | 3  | 8  | 276  | 31.5  | 7.64 |
| Q9NVV4 | Poly(A) RNA polymerase, mitochondrial<br>OS=Homo sapiens<br>GN=MTPAP<br>PE=1 SV=1 - [PAPD1_HUMAN]       | 5.15  | 1 | 2 | 3 | 6  | 0.941 | 1.341 | 0.883 | 1.664 | 13.18 | 5.15  | 4  | 6  | 582  | 66.1  | 9.04 |
| Q8NI35 | InaD-like protein<br>OS=Homo sapiens<br>GN=INADL<br>PE=1 SV=3 - [INADL_HUMAN]                           | 1.33  | 1 | 2 | 3 | 6  | 1.268 | 0.693 | 0.846 | 1.665 | 13.31 | 1.33  | 3  | 6  | 1801 | 196.2 | 4.94 |
| Q96EA4 | Protein Spindly<br>OS=Homo sapiens<br>GN=SPDL1<br>PE=1 SV=2 - [SPDLY_HUMAN]                             | 5.12  | 1 | 2 | 3 | 3  | 1.103 | 0.618 | 0.609 | 1.665 | 7.33  | 5.12  | 3  | 3  | 605  | 70.1  | 5.47 |
| Q6UW68 | Transmembrane protein 205<br>OS=Homo sapiens<br>GN=TMEM205<br>PE=1 SV=1 - [TM205_HUMAN]                 | 15.87 | 1 | 2 | 2 | 6  | 1.385 | 1.460 | 1.066 | 1.667 | 19.70 | 15.87 | 3  | 6  | 189  | 21.2  | 8.62 |
| O75717 | WD repeat and HMG-box DNA-binding protein 1<br>OS=Homo sapiens<br>GN=WDHD1<br>PE=1 SV=1 - [WDHD1_HUMAN] | 1.15  | 1 | 1 | 1 | 2  |       |       | 1.117 | 1.672 | 7.01  | 1.15  | 1  | 2  | 1129 | 125.9 | 5.62 |
| O43824 | Putative GTP-binding protein 6<br>OS=Homo sapiens<br>GN=GTPBP6<br>PE=2 SV=3 - [GTPB6_HUMAN]             | 2.13  | 1 | 1 | 1 | 4  | 0.924 | 1.592 | 1.247 | 1.673 | 7.42  | 2.13  | 2  | 4  | 516  | 56.8  | 9.42 |
| P78316 | Nucleolar protein 14<br>OS=Homo sapiens<br>GN=NOP14<br>PE=1 SV=3 - [NOP14_HUMAN]                        | 7.47  | 1 | 6 | 6 | 8  | 0.995 | 1.635 | 1.350 | 1.674 | 20.92 | 7.47  | 6  | 8  | 857  | 97.6  | 7.58 |

|        |                                                                                                                       |       |   |   |    |    |       |       |       |       |        |       |    |    |      |       |      |
|--------|-----------------------------------------------------------------------------------------------------------------------|-------|---|---|----|----|-------|-------|-------|-------|--------|-------|----|----|------|-------|------|
| P40306 | Proteasome subunit beta type-10<br>OS=Homo sapiens<br>GN=PSMB10<br>PE=1 SV=1 - [PSB10_HUMAN]                          | 33.70 | 1 | 6 | 6  | 23 | 2.274 | 1.136 | 0.729 | 1.676 | 49.21  | 33.70 | 9  | 23 | 273  | 28.9  | 7.81 |
| P37287 | Phosphatidylinositol N-acetylglucosaminyltransferase subunit A<br>OS=Homo sapiens<br>GN=PIGA PE=1 SV=1 - [PIGA_HUMAN] | 4.75  | 1 | 2 | 2  | 2  | 1.827 | 1.799 | 2.351 | 1.676 | 5.63   | 4.75  | 2  | 2  | 484  | 54.1  | 8.34 |
| P61077 | Ubiquitin-conjugating enzyme E2 D3<br>OS=Homo sapiens<br>GN=UBE2D3<br>PE=1 SV=1 - [UB2D3_HUMAN]                       | 6.80  | 1 | 1 | 2  | 17 | 3.798 | 1.740 | 1.861 | 1.677 | 31.37  | 6.80  | 4  | 17 | 147  | 16.7  | 7.80 |
| O15211 | Ral guanine nucleotide dissociation stimulator-like 2<br>OS=Homo sapiens<br>GN=RGL2 PE=1 SV=1 - [RGL2_HUMAN]          | 4.38  | 1 | 2 | 3  | 7  | 1.935 | 2.197 | 2.474 | 1.679 | 8.95   | 4.38  | 5  | 7  | 777  | 83.5  | 6.18 |
| Q9UNY4 | Transcription termination factor 2<br>OS=Homo sapiens<br>GN=TTTF2<br>PE=1 SV=2 - [TTTF2_HUMAN]                        | 1.03  | 1 | 1 | 1  | 2  | 1.047 | 0.981 | 1.087 | 1.682 | 5.20   | 1.03  | 2  | 2  | 1162 | 129.5 | 8.37 |
| P33991 | DNA replication licensing factor MCM4<br>OS=Homo sapiens<br>GN=MCM4<br>PE=1 SV=5 - [MCM4_HUMAN]                       | 8.81  | 1 | 7 | 7  | 16 | 1.351 | 1.332 | 0.598 | 1.682 | 36.44  | 8.81  | 10 | 16 | 863  | 96.5  | 6.74 |
| Q9H0V1 | Transmembrane protein 168<br>OS=Homo sapiens<br>GN=TMEM168<br>PE=1 SV=2 - [TM168_HUMAN]                               | 2.01  | 1 | 1 | 1  | 1  | 1.198 | 1.198 | 1.331 | 1.682 | 2.65   | 2.01  | 1  | 1  | 697  | 79.7  | 8.03 |
| P30481 | HLA class I histocompatibility antigen, B-44 alpha chain<br>OS=Homo sapiens<br>GN=HLA-B<br>PE=1 SV=1 - [1B44_HUMAN]   | 35.91 | 2 | 3 | 13 | 83 | 0.598 | 1.266 | 1.276 | 1.684 | 184.25 | 35.91 | 20 | 83 | 362  | 40.5  | 6.04 |

|        |                                                                                                                     |       |   |   |    |     |       |       |       |       |        |       |    |     |      |       |      |
|--------|---------------------------------------------------------------------------------------------------------------------|-------|---|---|----|-----|-------|-------|-------|-------|--------|-------|----|-----|------|-------|------|
| Q9NZ63 | Uncharacterized protein<br>C9orf78<br>OS=Homo sapiens<br>GN=C9orf78<br>PE=1 SV=1 - [C1078_HUMAN]                    | 2.77  | 1 | 1 | 1  | 3   | 1.065 | 1.502 | 1.264 | 1.685 | 6.91   | 2.77  | 2  | 3   | 289  | 33.7  | 6.74 |
| Q03518 | Antigen peptide transporter 1<br>OS=Homo sapiens<br>GN=TAP1<br>PE=1 SV=2 - [TAP1_HUMAN]                             | 11.14 | 1 | 6 | 6  | 12  | 1.776 | 0.795 | 0.865 | 1.685 | 41.40  | 11.14 | 8  | 12  | 808  | 87.2  | 8.02 |
| P30459 | HLA class I histocompatibility antigen, A-74 alpha chain<br>OS=Homo sapiens<br>GN=HLA-A<br>PE=1 SV=1 - [1A74_HUMAN] | 48.22 | 3 | 1 | 16 | 138 | 0.975 | 0.985 | 1.696 | 1.686 | 318.57 | 48.22 | 26 | 138 | 365  | 40.9  | 6.47 |
| Q9UFC0 | Leucine-rich repeat and WD repeat-containing protein 1<br>OS=Homo sapiens<br>GN=LRWD1<br>PE=1 SV=2 - [LRWD1_HUMAN]  | 3.55  | 1 | 2 | 2  | 3   | 1.107 | 1.401 | 0.903 | 1.687 | 7.51   | 3.55  | 2  | 3   | 647  | 70.8  | 7.21 |
| Q13490 | Baculoviral IAP repeat-containing protein 2<br>OS=Homo sapiens<br>GN=BIRC2<br>PE=1 SV=2 - [BIRC2_HUMAN]             | 6.31  | 1 | 3 | 3  | 3   | 1.298 | 1.151 | 1.047 | 1.688 | 6.03   | 6.31  | 3  | 3   | 618  | 69.9  | 6.70 |
| Q96BZ8 | Leukocyte receptor cluster member 1<br>OS=Homo sapiens<br>GN=LENG1<br>PE=1 SV=1 - [LENG1_HUMAN]                     | 2.65  | 1 | 1 | 1  | 2   | 0.808 | 0.596 | 0.573 | 1.688 | 4.69   | 2.65  | 1  | 2   | 264  | 30.5  | 9.69 |
| P60033 | CD81 antigen<br>OS=Homo sapiens<br>GN=CD81<br>PE=1 SV=1 - [CD81_HUMAN]                                              | 8.47  | 1 | 1 | 1  | 5   | 1.393 | 1.547 | 1.183 | 1.691 | 17.11  | 8.47  | 1  | 5   | 236  | 25.8  | 5.29 |
| Q9NNW5 | WD repeat-containing protein 6<br>OS=Homo sapiens<br>GN=WDR6<br>PE=1 SV=1 - [WDR6_HUMAN]                            | 0.89  | 1 | 1 | 1  | 1   | 0.994 | 1.659 | 1.344 | 1.691 | 2.19   | 0.89  | 1  | 1   | 1121 | 121.6 | 6.87 |

|        |                                                                                                             |       |   |    |    |     |       |       |       |       |        |       |    |     |      |       |      |
|--------|-------------------------------------------------------------------------------------------------------------|-------|---|----|----|-----|-------|-------|-------|-------|--------|-------|----|-----|------|-------|------|
| Q9H6E4 | Coiled-coil domain-containing protein 134<br>OS=Homo sapiens<br>GN=CCDC134<br>PE=1 SV=1 - [CC134_HUMAN]     | 20.52 | 1 | 3  | 3  | 4   | 1.519 | 1.494 | 1.530 | 1.692 | 9.42   | 20.52 | 4  | 4   | 229  | 26.5  | 8.85 |
| Q9HBG6 | Intraflagellar transport protein 122 homolog<br>OS=Homo sapiens<br>GN=IFT122<br>PE=1 SV=2 - [IF122_HUMAN]   | 1.13  | 1 | 1  | 2  | 4   | 4.115 | 7.157 | 4.636 | 1.693 | 3.85   | 1.13  | 2  | 4   | 1241 | 141.7 | 6.49 |
| Q9BXN1 | Asporin<br>OS=Homo sapiens<br>GN=ASPN<br>PE=1 SV=2 - [ASPN_HUMAN]                                           | 1.58  | 1 | 1  | 1  | 1   | 1.304 | 1.909 | 1.256 | 1.696 | 1.71   | 1.58  | 1  | 1   | 380  | 43.4  | 7.08 |
| Q7Z7H8 | 39S ribosomal protein L10, mitochondrial<br>OS=Homo sapiens<br>GN=MRPL10<br>PE=1 SV=3 - [RM10_HUMAN]        | 11.49 | 1 | 2  | 2  | 5   | 1.154 | 1.226 | 1.395 | 1.698 | 13.00  | 11.49 | 3  | 5   | 261  | 29.3  | 9.58 |
| Q13370 | cGMP-inhibited 3',5'-cyclic phosphodiesterase B<br>OS=Homo sapiens<br>GN=PDE3B<br>PE=1 SV=2 - [PDE3B_HUMAN] | 0.72  | 1 | 1  | 1  | 1   | 1.012 | 2.072 | 3.154 | 1.699 | 1.95   | 0.72  | 1  | 1   | 1112 | 124.3 | 5.91 |
| P49418 | Amphiphysin<br>OS=Homo sapiens<br>GN=AMPH<br>PE=1 SV=1 - [AMPH_HUMAN]                                       | 16.40 | 1 | 10 | 10 | 24  | 0.462 | 0.856 | 1.361 | 1.699 | 68.55  | 16.40 | 14 | 24  | 695  | 76.2  | 4.64 |
| P51688 | N-sulphoglucosamine sulphohydrolase<br>OS=Homo sapiens<br>GN=SGSH<br>PE=1 SV=1 - [SPHM_HUMAN]               | 19.72 | 1 | 8  | 8  | 25  | 1.057 | 0.858 | 1.065 | 1.700 | 59.07  | 19.72 | 12 | 25  | 502  | 56.7  | 6.95 |
| P16220 | Cyclic AMP-responsive element-binding protein 1<br>OS=Homo sapiens<br>GN=CREB1<br>PE=1 SV=2 - [CREB1_HUMAN] | 9.68  | 1 | 2  | 3  | 8   | 1.981 | 2.317 | 1.556 | 1.705 | 13.28  | 9.68  | 6  | 8   | 341  | 36.7  | 5.57 |
| P52789 | Hexokinase-2<br>OS=Homo sapiens<br>GN=HK2 PE=1 SV=2 - [HKK2_HUMAN]                                          | 41.77 | 1 | 33 | 37 | 159 | 2.334 | 0.488 | 0.867 | 1.705 | 413.55 | 41.77 | 61 | 159 | 917  | 102.3 | 6.05 |



|        |                                                                                                                                         |       |   |    |    |    |       |       |       |       |        |       |    |    |      |       |      |
|--------|-----------------------------------------------------------------------------------------------------------------------------------------|-------|---|----|----|----|-------|-------|-------|-------|--------|-------|----|----|------|-------|------|
| O15091 | Mitochondrial ribonuclease P protein 3<br>OS=Homo sapiens<br>GN=KIAA0391<br>PE=1 SV=2 - [MRRP3_HUMAN]                                   | 3.60  | 1 | 2  | 2  | 3  | 1.736 | 1.883 | 1.395 | 1.705 | 10.77  | 3.60  | 2  | 3  | 583  | 67.3  | 8.78 |
| Q96RL1 | BRCA1-A complex subunit RAP80<br>OS=Homo sapiens<br>GN=UIMC1<br>PE=1 SV=2 - [UIMC1_HUMAN]                                               | 0.97  | 1 | 1  | 1  | 1  | 1.670 | 1.373 | 1.066 | 1.712 | 0.00   | 0.97  | 1  | 1  | 719  | 79.7  | 5.45 |
| Q9BWG4 | Single-stranded DNA-binding protein 4<br>OS=Homo sapiens<br>GN=SSBP4<br>PE=1 SV=1 - [SSBP4_HUMAN]                                       | 4.42  | 1 | 1  | 1  | 1  | 0.907 | 2.210 | 1.311 | 1.712 | 4.33   | 4.42  | 1  | 1  | 385  | 39.4  | 6.80 |
| Q11201 | CMP-N-acetylneuramin ate-beta-galactosamide-alpha-2,3-sialyltransferase 1<br>OS=Homo sapiens<br>GN=ST3GAL1<br>PE=2 SV=1 - [SIA4A_HUMAN] | 9.71  | 1 | 3  | 3  | 7  | 0.930 | 0.568 | 0.491 | 1.712 | 10.71  | 9.71  | 4  | 7  | 340  | 39.1  | 9.09 |
| A5PL33 | Protein KRBA1<br>OS=Homo sapiens<br>GN=KRBA1<br>PE=1 SV=3 - [KRBA1_HUMAN]                                                               | 1.84  | 1 | 1  | 1  | 2  | 1.434 | 1.005 | 0.798 | 1.712 | 4.67   | 1.84  | 1  | 2  | 1030 | 107.4 | 7.83 |
| P43304 | Glycerol-3-phosphate dehydrogenase, mitochondrial<br>OS=Homo sapiens<br>GN=GPD2<br>PE=1 SV=3 - [GPD2_HUMAN]                             | 35.21 | 1 | 25 | 25 | 66 | 2.246 | 0.906 | 0.757 | 1.715 | 174.99 | 35.21 | 37 | 66 | 727  | 80.8  | 7.69 |
| Q9NZQ7 | Programmed cell death 1 ligand 1<br>OS=Homo sapiens<br>GN=CD274<br>PE=1 SV=1 - [PDL1_HUMAN]                                             | 2.41  | 1 | 1  | 1  | 2  | 5.189 | 0.701 | 0.629 | 1.716 | 1.99   | 2.41  | 2  | 2  | 290  | 33.3  | 7.23 |
| O94813 | Slit homolog 2 protein<br>OS=Homo sapiens<br>GN=SLIT2<br>PE=1 SV=1 - [SLIT2_HUMAN]                                                      | 2.88  | 1 | 2  | 3  | 6  | 2.722 | 3.067 | 4.977 | 1.717 | 4.65   | 2.88  | 3  | 6  | 1529 | 169.8 | 7.06 |

|        |                                                                                                                 |       |   |   |   |    |       |       |       |       |       |       |   |    |      |       |      |
|--------|-----------------------------------------------------------------------------------------------------------------|-------|---|---|---|----|-------|-------|-------|-------|-------|-------|---|----|------|-------|------|
| Q8IY67 | Ribonucleoprotein PTB-binding 1<br>OS=Homo sapiens<br>GN=RAVER1<br>PE=1 SV=1 - [RAVR1_HUMAN]                    | 1.82  | 1 | 1 | 1 | 4  | 1.454 | 1.559 | 0.886 | 1.718 | 4.83  | 1.82  | 2 | 4  | 606  | 63.8  | 8.48 |
| Q8NBZ7 | UDP-glucuronic acid decarboxylase 1<br>OS=Homo sapiens<br>GN=UXS1<br>PE=1 SV=1 - [UXS1_HUMAN]                   | 5.71  | 1 | 2 | 2 | 3  | 2.299 | 1.272 | 1.618 | 1.719 | 3.13  | 5.71  | 3 | 3  | 420  | 47.5  | 8.94 |
| P60059 | Protein transport protein Sec61 subunit gamma<br>OS=Homo sapiens<br>GN=SEC61G<br>PE=1 SV=1 - [SC61G_HUMAN]      | 11.76 | 1 | 1 | 1 | 1  | 1.269 | 2.521 | 3.107 | 1.721 | 0.00  | 11.76 | 1 | 1  | 68   | 7.7   | 9.99 |
| Q96P11 | Probable 28S rRNA (cytosine-C(5))-methyltransferase<br>OS=Homo sapiens<br>GN=NSUN5<br>PE=1 SV=2 - [NSUN5_HUMAN] | 4.66  | 1 | 1 | 2 | 4  | 0.848 | 1.083 | 1.046 | 1.722 | 7.66  | 4.66  | 4 | 4  | 429  | 46.7  | 8.62 |
| O15479 | Melanoma-associated antigen B2<br>OS=Homo sapiens<br>GN=MAGEB2<br>PE=1 SV=3 - [MAGB2_HUMAN]                     | 2.51  | 1 | 1 | 1 | 1  | 1.750 | 0.797 | 1.181 | 1.722 | 2.42  | 2.51  | 1 | 1  | 319  | 35.3  | 8.76 |
| Q52LD8 | Raftlin-2<br>OS=Homo sapiens<br>GN=RFTN2<br>PE=2 SV=3 - [RFTN2_HUMAN]                                           | 2.99  | 1 | 1 | 1 | 2  | 1.287 | 0.387 | 0.721 | 1.725 | 4.81  | 2.99  | 2 | 2  | 501  | 55.9  | 5.83 |
| P06727 | Apolipoprotein A-IV<br>OS=Homo sapiens<br>GN=APOA4<br>PE=1 SV=3 - [APOA4_HUMAN]                                 | 4.55  | 1 | 1 | 2 | 5  | 1.058 | 0.915 | 1.178 | 1.727 | 12.61 | 4.55  | 3 | 5  | 396  | 45.4  | 5.38 |
| Q6ZRR7 | Leucine-rich repeat-containing protein 9<br>OS=Homo sapiens<br>GN=LRRC9<br>PE=2 SV=2 - [LRRC9_HUMAN]            | 2.20  | 2 | 2 | 3 | 12 | 2.288 | 2.320 | 1.570 | 1.729 | 22.95 | 2.20  | 4 | 12 | 1453 | 166.8 | 7.65 |
| Q5VTB9 | E3 ubiquitin-protein ligase RNF220<br>OS=Homo sapiens<br>GN=RNF220<br>PE=1 SV=1 - [RN220_HUMAN]                 | 2.47  | 1 | 1 | 1 | 1  | 1.496 | 1.702 | 1.158 | 1.730 | 4.10  | 2.47  | 1 | 1  | 566  | 62.7  | 6.04 |

|        |                                                                                                            |       |   |    |    |     |       |       |       |       |        |       |    |     |      |       |      |
|--------|------------------------------------------------------------------------------------------------------------|-------|---|----|----|-----|-------|-------|-------|-------|--------|-------|----|-----|------|-------|------|
| Q9P217 | Zinc finger SWIM domain-containing protein 5<br>OS=Homo sapiens<br>GN=ZSWIM5<br>PE=2 SV=2 - [ZSWIM5_HUMAN] | 3.38  | 1 | 2  | 2  | 2   | 1.024 | 1.063 | 1.275 | 1.731 | 5.35   | 3.38  | 2  | 2   | 1185 | 130.6 | 7.18 |
| Q8WVM0 | Dimethyladenosine transferase 1, mitochondrial<br>OS=Homo sapiens<br>GN=TFB1M<br>PE=1 SV=1 - [TFB1M_HUMAN] | 5.78  | 1 | 1  | 2  | 3   | 1.280 | 0.900 | 1.215 | 1.733 | 2.35   | 5.78  | 3  | 3   | 346  | 39.5  | 9.26 |
| Q8IWI9 | MAX gene-associated protein<br>OS=Homo sapiens<br>GN=MGA PE=1 SV=3 - [MGAP_HUMAN]                          | 0.93  | 1 | 2  | 2  | 2   | 2.183 | 0.672 | 1.202 | 1.734 | 3.33   | 0.93  | 2  | 2   | 3026 | 331.6 | 6.79 |
| Q13634 | Cadherin-18<br>OS=Homo sapiens<br>GN=CDH18<br>PE=2 SV=1 - [CAD18_HUMAN]                                    | 6.96  | 1 | 3  | 3  | 3   | 0.924 | 1.243 | 0.860 | 1.734 | 2.62   | 6.96  | 3  | 3   | 790  | 88.0  | 5.14 |
| Q5T9L3 | Protein wntless homolog<br>OS=Homo sapiens<br>GN=WLS PE=1 SV=2 - [WLS_HUMAN]                               | 11.28 | 1 | 9  | 9  | 35  | 1.510 | 0.934 | 0.967 | 1.736 | 81.94  | 11.28 | 16 | 35  | 541  | 62.2  | 7.36 |
| Q12797 | Aspartyl/asparaginyl beta-hydroxylase<br>OS=Homo sapiens<br>GN=ASPH<br>PE=1 SV=3 - [ASPH_HUMAN]            | 39.71 | 1 | 33 | 33 | 333 | 1.337 | 0.649 | 0.855 | 1.736 | 854.94 | 39.71 | 54 | 333 | 758  | 85.8  | 5.01 |
| Q09472 | Histone acetyltransferase p300<br>OS=Homo sapiens<br>GN=EP300<br>PE=1 SV=2 - [EP300_HUMAN]                 | 2.03  | 3 | 4  | 5  | 6   | 1.436 | 1.910 | 0.865 | 1.738 | 10.49  | 2.03  | 6  | 6   | 2414 | 264.0 | 8.50 |
| A6NFQ2 | Protein FAM115C<br>OS=Homo sapiens<br>GN=FAM115C<br>PE=2 SV=2 - [F115C_HUMAN]                              | 2.18  | 1 | 2  | 2  | 5   | 1.842 | 1.065 | 1.639 | 1.738 | 10.64  | 2.18  | 3  | 5   | 919  | 100.8 | 7.17 |
| Q96NB3 | Zinc finger protein 830<br>OS=Homo sapiens<br>GN=ZNF830<br>PE=1 SV=2 - [ZNF830_HUMAN]                      | 4.03  | 1 | 1  | 2  | 3   | 1.603 | 1.315 | 1.453 | 1.738 | 5.46   | 4.03  | 2  | 3   | 372  | 42.0  | 5.31 |

|        |                                                                                                                       |      |   |   |   |    |       |       |       |       |       |      |   |    |     |      |      |
|--------|-----------------------------------------------------------------------------------------------------------------------|------|---|---|---|----|-------|-------|-------|-------|-------|------|---|----|-----|------|------|
| Q96MCS | Uncharacterized protein<br>C16orf45<br>OS=Homo sapiens<br>GN=C16orf45<br>PE=2 SV=1 - [CP045_HUMAN]                    | 5.39 | 1 | 1 | 1 | 5  | 0.730 | 1.239 | 1.130 | 1.738 | 20.37 | 5.39 | 1 | 5  | 204 | 23.7 | 6.16 |
| Q8TB37 | Iron-sulfur protein NUBPL<br>OS=Homo sapiens<br>GN=NUBPL<br>PE=1 SV=3 - [NUBPL_HUMAN]                                 | 5.02 | 1 | 2 | 2 | 4  | 1.083 | 1.880 | 1.336 | 1.739 | 5.80  | 5.02 | 3 | 4  | 319 | 34.1 | 9.04 |
| Q04725 | Transducin-like enhancer protein 2<br>OS=Homo sapiens<br>GN=TLE2 PE=1 SV=2 - [TLE2_HUMAN]                             | 8.08 | 4 | 4 | 4 | 5  | 1.160 | 1.474 | 1.014 | 1.740 | 5.32  | 8.08 | 5 | 5  | 743 | 79.8 | 6.62 |
| Q9BWU0 | Kanadaplin<br>OS=Homo sapiens<br>GN=SLC4A1AP<br>PE=1 SV=1 - [NADAP_HUMAN]                                             | 9.05 | 1 | 5 | 5 | 17 | 1.827 | 1.366 | 1.108 | 1.741 | 35.65 | 9.05 | 8 | 17 | 796 | 88.8 | 5.19 |
| P05412 | Transcription factor AP-1<br>OS=Homo sapiens<br>GN=JUN PE=1 SV=2 - [JUN_HUMAN]                                        | 6.95 | 1 | 1 | 2 | 7  | 1.230 | 0.375 | 0.678 | 1.743 | 26.84 | 6.95 | 2 | 7  | 331 | 35.7 | 8.76 |
| P52657 | Transcription initiation factor IIA subunit 2<br>OS=Homo sapiens<br>GN=GTF2A2<br>PE=1 SV=1 - [T2AG_HUMAN]             | 8.26 | 1 | 1 | 1 | 2  | 1.011 | 0.980 | 0.886 | 1.745 | 2.62  | 8.26 | 2 | 2  | 109 | 12.4 | 6.62 |
| P14210 | Hepatocyte growth factor<br>OS=Homo sapiens<br>GN=HGF PE=1 SV=2 - [HGF_HUMAN]                                         | 3.85 | 1 | 3 | 3 | 4  | 4.426 | 0.968 | 0.537 | 1.746 | 6.40  | 3.85 | 4 | 4  | 728 | 83.1 | 7.88 |
| Q9Y592 | Centrosomal protein of 83 kDa<br>OS=Homo sapiens<br>GN=CEP83<br>PE=1 SV=2 - [CEP83_HUMAN]                             | 4.76 | 1 | 2 | 3 | 3  | 0.960 | 0.969 | 0.814 | 1.751 | 4.45  | 4.76 | 3 | 3  | 693 | 82.0 | 6.28 |
| Q9HCC8 | Glycerophosphoinositol inositolphosphodiesterase<br>GDPD2<br>OS=Homo sapiens<br>GN=GDPD2<br>PE=2 SV=1 - [GDPD2_HUMAN] | 1.86 | 1 | 1 | 1 | 1  | 0.774 | 1.157 |       | 1.754 | 1.90  | 1.86 | 1 | 1  | 539 | 61.7 | 8.41 |

|        |                                                                                                                        |       |   |    |    |     |       |       |       |       |        |       |    |     |     |      |       |
|--------|------------------------------------------------------------------------------------------------------------------------|-------|---|----|----|-----|-------|-------|-------|-------|--------|-------|----|-----|-----|------|-------|
| Q13336 | Urea transporter 1<br>OS=Homo sapiens<br>GN=SLC14A1<br>PE=1 SV=2 - [UT1_HUMAN]                                         | 2.83  | 1 | 1  | 1  | 2   | 2.546 | 2.394 | 4.934 | 1.754 | 2.32   | 2.83  | 2  | 2   | 389 | 42.5 | 7.15  |
| P01579 | Interferon gamma<br>OS=Homo sapiens<br>GN=IFNG PE=1 SV=1 - [IFNG_HUMAN]                                                | 12.05 | 1 | 1  | 2  | 20  | 0.932 | 3.250 | 5.421 | 1.755 | 31.75  | 12.05 | 2  | 20  | 166 | 19.3 | 9.47  |
| Q96RD6 | Pannexin-2<br>OS=Homo sapiens<br>GN=PANX2<br>PE=2 SV=2 - [PANX2_HUMAN]                                                 | 3.84  | 1 | 1  | 1  | 3   |       | 1.644 | 1.867 | 1.757 | 5.85   | 3.84  | 1  | 3   | 677 | 74.4 | 8.02  |
| P16188 | HLA class I histocompatibility antigen, A-30 alpha chain<br>OS=Homo sapiens<br>GN=HLA-A<br>PE=1 SV=2 - [1A30_HUMAN]    | 47.40 | 3 | 1  | 16 | 151 | 0.965 | 0.818 | 1.307 | 1.759 | 353.65 | 47.40 | 26 | 151 | 365 | 40.9 | 6.10  |
| P00352 | Retinal dehydrogenase 1<br>OS=Homo sapiens<br>GN=ALDH1A1<br>PE=1 SV=2 - [AL1A1_HUMAN]                                  | 53.49 | 1 | 20 | 23 | 205 | 3.012 | 0.337 | 1.264 | 1.760 | 452.79 | 53.49 | 38 | 205 | 501 | 54.8 | 6.73  |
| O94923 | D-glucuronyl C5-epimerase<br>OS=Homo sapiens<br>GN=GLCE PE=1 SV=3 - [GLCE_HUMAN]                                       | 1.30  | 1 | 1  | 1  | 2   | 2.271 | 1.286 | 0.774 | 1.761 | 4.72   | 1.30  | 2  | 2   | 617 | 70.1 | 8.97  |
| Q92529 | SHC-transforming protein 3<br>OS=Homo sapiens<br>GN=SHC3<br>PE=1 SV=1 - [SHC3_HUMAN]                                   | 2.69  | 1 | 1  | 1  | 1   | 2.473 | 0.794 | 0.425 | 1.762 | 0.00   | 2.69  | 1  | 1   | 594 | 64.0 | 8.32  |
| Q8IZR5 | CKLF-like MARVEL transmembrane domain-containing protein 4<br>OS=Homo sapiens<br>GN=CMTM4<br>PE=1 SV=1 - [CKLF4_HUMAN] | 10.26 | 1 | 2  | 2  | 2   | 2.011 | 1.173 | 3.447 | 1.766 | 0.00   | 10.26 | 2  | 2   | 234 | 25.8 | 7.75  |
| P16104 | Histone H2AX<br>OS=Homo sapiens<br>GN=H2AFX<br>PE=1 SV=2 - [H2AX_HUMAN]                                                | 22.38 | 2 | 2  | 6  | 81  | 1.799 | 2.216 | 1.046 | 1.769 | 182.47 | 22.38 | 11 | 81  | 143 | 15.1 | 10.74 |

|        |                                                                                                                             |       |   |   |   |    |       |       |       |       |       |       |   |    |      |       |      |
|--------|-----------------------------------------------------------------------------------------------------------------------------|-------|---|---|---|----|-------|-------|-------|-------|-------|-------|---|----|------|-------|------|
| Q5JQS6 | Germinal center-associated signaling and motility-like protein<br>OS=Homo sapiens<br>GN=GCSAML<br>PE=2 SV=1 - [GSAML_HUMAN] | 6.67  | 1 | 1 | 1 | 1  | 0.461 | 0.459 | 0.876 | 1.770 | 2.35  | 6.67  | 1 | 1  | 135  | 15.7  | 6.68 |
| Q9UPT9 | Ubiquitin carboxyl-terminal hydrolase 22<br>OS=Homo sapiens<br>GN=USP22<br>PE=1 SV=2 - [UBP22_HUMAN]                        | 3.62  | 2 | 2 | 2 | 6  | 0.969 | 1.085 | 0.932 | 1.771 | 7.46  | 3.62  | 4 | 6  | 525  | 59.9  | 8.05 |
| Q9ULR0 | Pre-mRNA-splicing factor ISY1 homolog<br>OS=Homo sapiens<br>GN=ISY1 PE=1 SV=3 - [ISY1_HUMAN]                                | 21.40 | 1 | 6 | 6 | 18 | 1.081 | 1.122 | 1.011 | 1.776 | 46.72 | 21.40 | 8 | 18 | 285  | 33.0  | 5.17 |
| O75182 | Paired amphipathic helix protein Sin3b<br>OS=Homo sapiens<br>GN=SIN3B<br>PE=1 SV=2 - [SIN3B_HUMAN]                          | 2.24  | 1 | 2 | 2 | 3  | 0.701 | 0.967 | 0.625 | 1.777 | 4.10  | 2.24  | 2 | 3  | 1162 | 133.0 | 6.93 |
| Q8N3X1 | Formin-binding protein 4<br>OS=Homo sapiens<br>GN=FBNP4<br>PE=1 SV=3 - [FBNP4_HUMAN]                                        | 3.74  | 1 | 2 | 3 | 3  | 1.076 | 1.435 | 1.193 | 1.777 | 9.67  | 3.74  | 3 | 3  | 1017 | 110.2 | 4.74 |
| Q969Z3 | Mitochondrial amidoxime reducing component 2<br>OS=Homo sapiens<br>GN=MARC2<br>PE=1 SV=1 - [MARC2_HUMAN]                    | 7.46  | 2 | 3 | 3 | 5  | 1.766 | 0.760 | 0.657 | 1.778 | 13.96 | 7.46  | 4 | 5  | 335  | 38.0  | 9.16 |
| Q08495 | Dematin<br>OS=Homo sapiens<br>GN=DMTN<br>PE=1 SV=3 - [DEMA_HUMAN]                                                           | 3.46  | 1 | 1 | 1 | 1  | 0.310 | 1.717 | 0.569 | 1.780 | 2.51  | 3.46  | 1 | 1  | 405  | 45.5  | 8.88 |
| Q13356 | Peptidyl-prolyl cis-trans isomerase-like 2<br>OS=Homo sapiens<br>GN=PPIL2<br>PE=1 SV=1 - [PPIL2_HUMAN]                      | 4.81  | 1 | 2 | 2 | 4  | 1.001 | 1.382 | 0.847 | 1.780 | 7.34  | 4.81  | 4 | 4  | 520  | 58.8  | 8.78 |

|        |                                                                                                                 |       |   |    |    |    |       |       |       |       |       |       |    |    |      |       |      |
|--------|-----------------------------------------------------------------------------------------------------------------|-------|---|----|----|----|-------|-------|-------|-------|-------|-------|----|----|------|-------|------|
| Q9BT25 | HAUS augmin-like complex subunit 8<br>OS=Homo sapiens<br>GN=HAUS8<br>PE=1 SV=3 - [HAUS_HUMAN]                   | 5.37  | 1 | 1  | 2  | 8  | 1.461 | 1.099 | 1.077 | 1.781 | 21.26 | 5.37  | 2  | 8  | 410  | 44.8  | 7.06 |
| Q15388 | Mitochondrial import receptor subunit TOM20 homolog<br>OS=Homo sapiens<br>GN=TOMM20<br>PE=1 SV=1 - [TOM20_HUMA] | 31.03 | 1 | 3  | 3  | 6  |       | 1.769 | 1.309 | 1.782 | 26.54 | 31.03 | 3  | 6  | 145  | 16.3  | 8.60 |
| Q9ULK6 | Phosphatidylcholine transfer protein<br>OS=Homo sapiens<br>GN=PCTP<br>PE=1 SV=1 - [PPCT_HUMAN]                  | 4.67  | 1 | 1  | 1  | 2  | 1.787 | 1.242 | 1.218 | 1.784 | 4.37  | 4.67  | 2  | 2  | 214  | 24.8  | 5.78 |
| Q2LD37 | Uncharacterized protein KIAA1109<br>OS=Homo sapiens<br>GN=KIAA1109<br>PE=1 SV=2 - [K1109_HUMAN]                 | 0.28  | 1 | 2  | 2  | 2  | 0.897 | 0.819 |       | 1.785 | 2.33  | 0.28  | 2  | 2  | 5005 | 555.1 | 6.58 |
| Q7Z7G0 | Target of Nesh-3H3 OS=Homo sapiens<br>GN=ABI3BP<br>PE=1 SV=1 - [TARSH_HUMAN]                                    | 3.63  | 1 | 2  | 2  | 2  | 1.234 | 0.707 | 0.754 | 1.786 | 1.82  | 3.63  | 2  | 2  | 1075 | 118.6 | 9.44 |
| P33993 | DNA replication licensing factor MCM7<br>OS=Homo sapiens<br>GN=MCM7<br>PE=1 SV=4 - [MCM7_HUMAN]                 | 18.08 | 1 | 11 | 11 | 28 | 1.265 | 1.173 | 0.631 | 1.791 | 81.54 | 18.08 | 16 | 28 | 719  | 81.3  | 6.46 |
| Q8NEF9 | Serum response factor-binding protein 1<br>OS=Homo sapiens<br>GN=SRFBP1<br>PE=1 SV=1 - [SRFB1_HUMAN]            | 6.99  | 1 | 3  | 3  | 7  | 0.749 | 1.018 | 0.883 | 1.795 | 15.12 | 6.99  | 4  | 7  | 429  | 48.6  | 9.58 |
| Q7LBR1 | Charged multivesicular body protein 1b OS=Homo sapiens<br>GN=CHMP1B<br>PE=1 SV=1 - [CHM1B_HUMAN]                | 11.56 | 1 | 3  | 3  | 13 | 1.789 | 1.214 | 0.881 | 1.796 | 26.09 | 11.56 | 6  | 13 | 199  | 22.1  | 8.10 |
| P02774 | Vitamin D-binding protein<br>OS=Homo sapiens<br>GN=GC<br>PE=1 SV=1 - [VTDB_HUMAN]                               | 7.59  | 1 | 2  | 3  | 9  | 1.324 | 0.636 | 1.319 | 1.798 | 22.80 | 7.59  | 5  | 9  | 474  | 52.9  | 5.54 |

|        |                                                                                                         |       |   |    |    |     |       |       |       |       |        |       |    |     |      |       |       |
|--------|---------------------------------------------------------------------------------------------------------|-------|---|----|----|-----|-------|-------|-------|-------|--------|-------|----|-----|------|-------|-------|
| Q96CN7 | Isochorismatase domain-containing protein 1<br>OS=Homo sapiens<br>GN=ISOC1<br>PE=1 SV=3 - [ISOC1_HUMAN] | 43.62 | 1 | 10 | 10 | 30  | 1.970 | 1.423 | 0.807 | 1.802 | 74.49  | 43.62 | 16 | 30  | 298  | 32.2  | 7.39  |
| O60512 | Beta-1,4-galactosyltransferase 3<br>OS=Homo sapiens<br>GN=B4GALT3<br>PE=1 SV=2 - [B4GT3_HUMAN]          | 2.04  | 1 | 1  | 1  | 1   | 1.120 | 1.030 | 0.856 | 1.806 | 3.55   | 2.04  | 1  | 1   | 393  | 43.9  | 9.25  |
| Q98Y78 | RING finger protein 26<br>OS=Homo sapiens<br>GN=RNF26<br>PE=2 SV=1 - [RNF26_HUMAN]                      | 12.01 | 1 | 2  | 2  | 2   | 1.835 | 0.974 | 2.214 | 1.811 | 5.50   | 12.01 | 2  | 2   | 433  | 47.7  | 8.46  |
| P08603 | Complement factor H<br>OS=Homo sapiens<br>GN=CFH PE=1 SV=4 - [CFAH_HUMAN]                               | 0.81  | 1 | 1  | 1  | 2   | 1.268 | 0.892 | 1.262 | 1.812 | 3.44   | 0.81  | 2  | 2   | 1231 | 139.0 | 6.61  |
| Q969I3 | Glycine N-acyltransferase-like protein 1<br>OS=Homo sapiens<br>GN=GLYATL1<br>PE=1 SV=1 - [GLYL1_HUMAN]  | 3.64  | 1 | 1  | 1  | 1   | 1.712 | 0.915 | 1.329 | 1.820 | 0.00   | 3.64  | 1  | 1   | 302  | 35.1  | 6.87  |
| O14817 | Tetraspanin-4<br>OS=Homo sapiens<br>GN=TSPAN4<br>PE=1 SV=1 - [TSN4_HUMAN]                               | 3.36  | 1 | 1  | 1  | 2   | 3.373 | 0.449 | 0.472 | 1.833 | 2.19   | 3.36  | 1  | 2   | 238  | 26.1  | 6.47  |
| P53708 | Integrin alpha-8<br>OS=Homo sapiens<br>GN=ITGA8<br>PE=1 SV=3 - [ITAB_HUMAN]                             | 5.36  | 1 | 5  | 6  | 9   | 1.522 | 0.740 | 1.634 | 1.834 | 17.14  | 5.36  | 8  | 9   | 1063 | 117.4 | 5.58  |
| Q02539 | Histone H1.1<br>OS=Homo sapiens<br>GN=HIST1H1A<br>PE=1 SV=3 - [H11_HUMAN]                               | 36.74 | 2 | 3  | 12 | 101 | 0.978 | 0.792 | 0.805 | 1.838 | 224.65 | 36.74 | 18 | 101 | 215  | 21.8  | 10.99 |
| P49005 | DNA polymerase delta subunit 2<br>OS=Homo sapiens<br>GN=POLD2<br>PE=1 SV=1 - [DPOD2_HUMAN]              | 4.90  | 1 | 2  | 2  | 4   | 1.275 | 1.662 | 1.493 | 1.843 | 0.00   | 4.90  | 4  | 4   | 469  | 51.3  | 5.58  |



|        |                                                                                                                       |       |   |   |    |     |       |       |       |       |        |       |    |     |     |      |       |
|--------|-----------------------------------------------------------------------------------------------------------------------|-------|---|---|----|-----|-------|-------|-------|-------|--------|-------|----|-----|-----|------|-------|
| P01892 | HLA class I histocompatibility antigen, A-2 alpha chain<br>OS=Homo sapiens<br>GN=HLA-A<br>PE=1 SV=1 - [1A02_HUMAN]    | 54.52 | 2 | 3 | 22 | 214 | 2.791 | 1.134 | 1.341 | 1.846 | 517.59 | 54.52 | 36 | 214 | 365 | 40.9 | 6.99  |
| P58004 | Sestrin-2<br>OS=Homo sapiens<br>GN=SESN2<br>PE=1 SV=1 - [SESN2_HUMAN]                                                 | 3.33  | 1 | 1 | 1  | 8   | 0.677 | 0.941 | 0.943 | 1.847 | 33.01  | 3.33  | 1  | 8   | 480 | 54.5 | 5.90  |
| Q81UE6 | Histone H2A type 2-B<br>OS=Homo sapiens<br>GN=HIST2H2AB<br>PE=1 SV=3 - [H2A2B_HUMAN]                                  | 17.69 | 1 | 1 | 3  | 50  | 1.750 | 3.283 | 1.300 | 1.847 | 120.51 | 17.69 | 4  | 50  | 130 | 14.0 | 10.89 |
| Q86SG6 | Serine/threonine-protein kinase Nek8<br>OS=Homo sapiens<br>GN=NEK8<br>PE=1 SV=1 - [NEK8_HUMAN]                        | 1.59  | 1 | 1 | 1  | 4   | 1.249 |       | 2.434 | 1.850 | 10.38  | 1.59  | 1  | 4   | 692 | 74.8 | 7.81  |
| Q53GL0 | Pleckstrin homology domain-containing family O member 1<br>OS=Homo sapiens<br>GN=PLEKHO1<br>PE=1 SV=2 - [PKHO1_HUMAN] | 1.71  | 1 | 1 | 1  | 1   | 1.267 | 2.663 | 1.834 | 1.854 | 2.42   | 1.71  | 1  | 1   | 409 | 46.2 | 8.82  |
| P20592 | Interferon-induced GTP-binding protein Mx2<br>OS=Homo sapiens<br>GN=MX2 PE=1 SV=1 - [MX2_HUMAN]                       | 16.92 | 1 | 9 | 11 | 27  | 8.085 | 1.125 | 1.400 | 1.854 | 54.96  | 16.92 | 15 | 27  | 715 | 82.0 | 8.76  |
| Q765P7 | MTSS1-like protein<br>OS=Homo sapiens<br>GN=MTSS1L<br>PE=1 SV=1 - [MTSSL_HUMAN]                                       | 15.66 | 1 | 7 | 8  | 22  | 1.853 | 1.189 | 1.385 | 1.855 | 55.21  | 15.66 | 11 | 22  | 747 | 79.9 | 7.47  |
| O14929 | Histone acetyltransferase type B catalytic subunit<br>OS=Homo sapiens<br>GN=HAT1<br>PE=1 SV=1 - [HAT1_HUMAN]          | 5.97  | 1 | 3 | 3  | 5   | 1.374 | 1.018 | 0.740 | 1.856 | 8.56   | 5.97  | 5  | 5   | 419 | 49.5 | 5.69  |

|        |                                                                                                                                         |       |   |   |    |    |        |       |       |       |        |       |    |    |     |      |      |
|--------|-----------------------------------------------------------------------------------------------------------------------------------------|-------|---|---|----|----|--------|-------|-------|-------|--------|-------|----|----|-----|------|------|
| P30486 | HLA class I histocompatibility antigen, B-48 alpha chain<br>OS=Homo sapiens<br>GN=HLA-B<br>PE=1 SV=1 - [1B48_HUMAN]                     | 32.87 | 2 | 1 | 11 | 58 | 12.087 | 0.906 | 2.426 | 1.860 | 143.05 | 32.87 | 16 | 58 | 362 | 40.3 | 6.00 |
| Q9P2N2 | Rho GTPase-activating protein 28<br>OS=Homo sapiens<br>GN=ARHGAP28<br>PE=1 SV=3 - [RHG28_HUMAN]                                         | 2.88  | 1 | 1 | 2  | 4  | 2.070  | 0.734 | 0.960 | 1.864 | 13.84  | 2.88  | 3  | 4  | 729 | 82.0 | 7.75 |
| Q6IS24 | Putative polypeptide N-acetylgalactosaminyltransferase-like protein 3<br>OS=Homo sapiens<br>GN=WBSCR17<br>PE=2 SV=2 - [GLTL3_HUMAN]     | 4.18  | 1 | 1 | 1  | 1  | 3.773  | 4.740 | 2.642 | 1.865 | 0.00   | 4.18  | 1  | 1  | 598 | 67.7 | 8.90 |
| Q4V9L6 | Transmembrane protein 119<br>OS=Homo sapiens<br>GN=TMEM119<br>PE=2 SV=1 - [TM119_HUMAN]                                                 | 12.37 | 1 | 4 | 4  | 12 | 1.889  | 0.462 | 0.607 | 1.865 | 17.30  | 12.37 | 7  | 12 | 283 | 29.2 | 4.58 |
| Q5W0B7 | Transmembrane protein 236<br>OS=Homo sapiens<br>GN=TMEM236<br>PE=2 SV=1 - [TM236_HUMAN]                                                 | 4.56  | 1 | 1 | 1  | 1  | 1.798  | 1.038 | 0.529 | 1.865 | 0.00   | 4.56  | 1  | 1  | 351 | 39.6 | 9.26 |
| O15554 | Intermediate conductance calcium-activated potassium channel protein 4<br>OS=Homo sapiens<br>GN=KCNN4<br>PE=1 SV=1 - REST corepressor 1 | 3.98  | 1 | 1 | 1  | 1  | 1.388  | 1.112 | 0.983 | 1.871 | 0.00   | 3.98  | 1  | 1  | 427 | 47.7 | 9.83 |
| Q9UKL0 | OS=Homo sapiens<br>GN=RCOR1<br>PE=1 SV=1 - [RCOR1_HUMAN]                                                                                | 6.64  | 1 | 2 | 2  | 3  | 1.545  | 1.705 | 1.221 | 1.873 | 5.03   | 6.64  | 3  | 3  | 482 | 53.0 | 7.03 |
| Q8NBV4 | Probable lipid phosphate phosphatase<br>PPAPDC3<br>OS=Homo sapiens<br>GN=PPAPDC3<br>PE=2 SV=1 - [PPAC3_HUMAN]                           | 6.27  | 1 | 1 | 1  | 8  | 0.992  | 1.661 | 1.248 | 1.878 | 19.84  | 6.27  | 2  | 8  | 271 | 29.4 | 9.94 |

|        |                                                                                                                                                                                      |       |   |   |   |   |       |       |       |       |       |       |   |     |      |       |      |
|--------|--------------------------------------------------------------------------------------------------------------------------------------------------------------------------------------|-------|---|---|---|---|-------|-------|-------|-------|-------|-------|---|-----|------|-------|------|
| P31152 | Mitogen-activated protein kinase<br>4 OS=Homo sapiens<br>GN=MAPK4<br>PE=1 SV=2 - [MKO4_HUMAN]                                                                                        | 4.26  | 2 | 1 | 2 | 5 |       | 3.186 | 1.878 | 13.04 | 4.26  | 3     | 5 | 587 | 65.9 | 5.45  |      |
| P57081 | tRNA (guanine-N(7)-)-methyltransferase non-catalytic subunit WDR4<br>OS=Homo sapiens<br>GN=WDR4<br>PE=1 SV=2 - [WDR4_HUMAN<br>G-protein coupled receptor-associated sorting protein] | 1.70  | 1 | 1 | 1 | 1 | 1.141 | 1.448 | 1.256 | 1.886 | 2.30  | 1.70  | 1 | 1   | 412  | 45.5  | 7.11 |
| Q96D09 | 2 OS=Homo sapiens<br>GN=GPRASP2<br>PE=1 SV=1 - [GASP2_HUMAN]                                                                                                                         | 5.13  | 1 | 4 | 4 | 8 | 1.280 | 1.145 | 1.881 | 1.886 | 16.30 | 5.13  | 6 | 8   | 838  | 93.7  | 5.01 |
| Q9UJ14 | Gamma-glutamyltransferase 7<br>OS=Homo sapiens<br>GN=GGT7<br>PE=1 SV=2 - [GGT7_HUMAN]                                                                                                | 8.61  | 1 | 3 | 3 | 8 | 1.612 | 1.451 | 1.605 | 1.888 | 21.77 | 8.61  | 4 | 8   | 662  | 70.4  | 5.10 |
| Q01955 | Collagen alpha-3(IV) chain<br>OS=Homo sapiens<br>GN=COL4A3<br>PE=1 SV=3 - [COL4A3_HUMAN]                                                                                             | 2.63  | 1 | 2 | 2 | 3 |       | 1.259 | 1.089 | 1.892 | 10.17 | 2.63  | 2 | 3   | 1670 | 161.7 | 9.16 |
| P55345 | Protein arginine N-methyltransferase 2<br>OS=Homo sapiens<br>GN=PRMT2<br>PE=1 SV=1 - [ANM2_HUMAN]                                                                                    | 1.62  | 1 | 1 | 1 | 1 | 0.827 | 2.140 | 1.098 | 1.893 | 0.00  | 1.62  | 1 | 1   | 433  | 49.0  | 5.17 |
| Q8IWL3 | Iron-sulfur cluster co-chaperone protein HscB, mitochondrial<br>OS=Homo sapiens<br>GN=HSCB<br>PE=1 SV=3 - [HSC20_HUMAN]                                                              | 11.49 | 1 | 3 | 3 | 8 | 1.684 | 1.289 | 0.841 | 1.894 | 23.12 | 11.49 | 5 | 8   | 235  | 27.4  | 7.69 |
| Q9NSI6 | Bromodomain and WD repeat-containing protein 1<br>OS=Homo sapiens<br>GN=BRWD1<br>PE=1 SV=4 - [BRWD1_HUMAN]                                                                           | 0.52  | 1 | 1 | 1 | 1 | 1.496 | 1.016 | 1.411 | 1.895 | 2.31  | 0.52  | 1 | 1   | 2320 | 262.8 | 8.46 |

|        |                                                                                                             |       |   |   |    |    |       |       |       |       |       |       |    |    |      |       |       |
|--------|-------------------------------------------------------------------------------------------------------------|-------|---|---|----|----|-------|-------|-------|-------|-------|-------|----|----|------|-------|-------|
| Q9H222 | ATP-binding cassette sub-family G member 5<br>OS=Homo sapiens<br>GN=ABCG5<br>PE=1 SV=1 - [ABCG5_HUMAN]      | 2.00  | 1 | 1 | 1  | 1  | 1.710 | 1.207 | 1.122 | 1.896 | 0.00  | 2.00  | 1  | 1  | 651  | 72.5  | 8.95  |
| Q8N264 | Rho GTPase-activating protein 24<br>OS=Homo sapiens<br>GN=ARHGAP24<br>PE=1 SV=2 - [RHG24_HUMAN]             | 1.60  | 1 | 1 | 1  | 2  | 0.584 | 1.295 | 1.041 | 1.898 | 2.91  | 1.60  | 2  | 2  | 748  | 84.2  | 6.67  |
| P45983 | Mitogen-activated protein kinase 8<br>OS=Homo sapiens<br>GN=MAPK8<br>PE=1 SV=2 - [MK08_HUMAN]               | 13.35 | 4 | 2 | 6  | 14 | 0.593 | 0.836 | 0.859 | 1.900 | 28.37 | 13.35 | 10 | 14 | 427  | 48.3  | 6.89  |
| O60675 | Transcription factor MafK<br>OS=Homo sapiens<br>GN=MAFK<br>PE=1 SV=1 - [MAFK_HUMAN]                         | 4.49  | 3 | 1 | 1  | 4  | 0.998 | 0.948 | 0.912 | 1.904 | 9.03  | 4.49  | 2  | 4  | 156  | 17.5  | 10.10 |
| O15516 | Circadian locomotor output cycles protein kaput<br>OS=Homo sapiens<br>GN=CLOCK<br>PE=1 SV=1 - [CLOCK_HUMAN] | 2.01  | 1 | 1 | 1  | 1  | 1.645 | 0.790 | 1.722 | 1.905 | 0.00  | 2.01  | 1  | 1  | 846  | 95.2  | 7.01  |
| Q7Z7K6 | Centromere protein V<br>OS=Homo sapiens<br>GN=CENPV<br>PE=1 SV=1 - [CENPV_HUMAN]                            | 18.18 | 1 | 3 | 3  | 6  | 0.670 | 2.294 | 1.029 | 1.909 | 30.43 | 18.18 | 4  | 6  | 275  | 29.9  | 9.73  |
| Q6PJW8 | Consortin<br>OS=Homo sapiens<br>GN=CNST<br>PE=1 SV=3 - [CNST_HUMAN]                                         | 1.52  | 1 | 1 | 1  | 3  | 0.953 | 1.092 | 1.624 | 1.909 | 8.24  | 1.52  | 1  | 3  | 725  | 79.5  | 4.53  |
| P25054 | Adenomatous polyposis coli protein<br>OS=Homo sapiens<br>GN=APC<br>PE=1 SV=2 - [APC_HUMAN]                  | 2.46  | 1 | 4 | 5  | 9  | 1.965 | 1.162 | 0.978 | 1.909 | 8.99  | 2.46  | 7  | 9  | 2843 | 311.5 | 7.80  |
| P30405 | Peptidyl-prolyl isomerase F, mitochondrial<br>OS=Homo sapiens<br>GN=PP1F<br>PE=1 SV=1 - [PP1F_HUMAN]        | 52.17 | 2 | 7 | 10 | 42 | 1.744 | 0.856 | 0.696 | 1.910 | 89.25 | 52.17 | 12 | 42 | 207  | 22.0  | 9.38  |

|        |                                                                                                                                              |       |   |    |    |     |       |       |       |       |         |       |    |     |      |       |       |
|--------|----------------------------------------------------------------------------------------------------------------------------------------------|-------|---|----|----|-----|-------|-------|-------|-------|---------|-------|----|-----|------|-------|-------|
| P35125 | Ubiquitin<br>carboxyl-<br>terminal<br>hydrolase 6<br>OS=Homo<br>sapiens<br>GN=USP6<br>PE=1 SV=2 -<br>[UBP6_HUMAN]                            | 2.49  | 1 | 2  | 2  | 2   | 1.281 | 1.112 | 2.070 | 1.910 | 2.55    | 2.49  | 2  | 2   | 1406 | 158.6 | 7.71  |
| Q96DH6 | RNA-binding<br>protein<br>Musashi<br>homolog 2<br>OS=Homo<br>sapiens<br>GN=MSI2<br>PE=1 SV=1 -<br>[MSI2H_HUMAN]                              | 13.11 | 1 | 3  | 3  | 4   | 1.502 | 1.008 | 0.899 | 1.911 | 11.10   | 13.11 | 4  | 4   | 328  | 35.2  | 8.48  |
| P54652 | Heat shock-<br>related 70 kDa<br>protein 2<br>OS=Homo<br>sapiens<br>GN=HSPA2<br>PE=1 SV=1 -<br>[HSP72_HUMAN]                                 | 56.34 | 1 | 19 | 39 | 983 | 2.347 | 1.396 | 0.859 | 1.913 | 2193.98 | 56.34 | 69 | 983 | 639  | 70.0  | 5.74  |
| Q9H6F5 | Coiled-coil<br>domain-<br>containing<br>protein 86<br>OS=Homo<br>sapiens<br>GN=CCDC86<br>PE=1 SV=1 -<br>[CCDC86_HUMAN]                       | 21.11 | 1 | 6  | 6  | 11  | 0.901 | 0.880 | 0.810 | 1.919 | 22.70   | 21.11 | 8  | 11  | 360  | 40.2  | 10.33 |
| Q569K6 | Coiled-coil<br>domain-<br>containing<br>protein 157<br>OS=Homo<br>sapiens<br>GN=CCDC157<br>PE=2 SV=3 -<br>[CC157_HUMAN]                      | 2.79  | 3 | 1  | 3  | 20  | 1.161 | 0.974 | 1.178 | 1.920 | 46.23   | 2.79  | 4  | 20  | 752  | 83.9  | 7.15  |
| Q9HCL0 | Protocadherin-<br>18 OS=Homo<br>sapiens<br>GN=PCDH18<br>PE=2 SV=3 -<br>[PCD18_HUMAN]                                                         | 4.41  | 1 | 2  | 2  | 3   | 1.659 | 0.431 | 0.310 | 1.924 | 5.82    | 4.41  | 3  | 3   | 1135 | 126.1 | 5.15  |
| Q9BXB1 | Leucine-rich<br>repeat-<br>containing G-<br>protein<br>coupled<br>receptor 4<br>OS=Homo<br>sapiens<br>GN=LGR4 PE=1<br>SV=2 -<br>[LGR4_HUMAN] | 1.05  | 1 | 1  | 1  | 4   | 3.202 | 0.225 | 0.476 | 1.925 | 1.62    | 1.05  | 1  | 4   | 951  | 104.4 | 6.19  |
| Q86VD7 | Mitochondrial<br>coenzyme A<br>transporter<br>SLC25A42<br>OS=Homo<br>sapiens<br>GN=SLC25A42<br>PE=2 SV=2 -<br>[S2542_HUMAN]                  | 3.46  | 1 | 1  | 1  | 3   | 1.641 | 1.341 | 1.470 | 1.926 | 7.57    | 3.46  | 2  | 3   | 318  | 35.4  | 10.07 |

|        |                                                                                                         |       |     |   |    |     |       |       |       |       |        |       |    |     |      |       |       |
|--------|---------------------------------------------------------------------------------------------------------|-------|-----|---|----|-----|-------|-------|-------|-------|--------|-------|----|-----|------|-------|-------|
| O00160 | Unconventional myosin-I<br>OS=Homo sapiens<br>GN=MYO1F<br>PE=1 SV=3 - [MYO1F_HUMAN]                     | 1.55  | 1   | 1 | 2  | 6   | 1.153 | 0.830 | 1.307 | 1.934 | 9.35   | 1.55  | 3  | 6   | 1098 | 124.8 | 9.11  |
| Q8NFG4 | Folliculin<br>OS=Homo sapiens<br>GN=FLCN PE=1 SV=1 - [FLCN_HUMAN]                                       | 5.70  | 1   | 2 | 2  | 4   | 2.369 | 1.904 | 1.425 | 1.935 | 3.08   | 5.70  | 2  | 4   | 579  | 64.4  | 6.23  |
| P0CJ79 | Zinc finger protein 888<br>OS=Homo sapiens<br>GN=ZNF888<br>PE=3 SV=1 - [ZNF888_HUMAN]                   | 16.20 | 122 | 1 | 3  | 7   | 1.098 | 0.841 | 1.871 | 1.942 | 4.69   | 16.20 | 4  | 7   | 500  | 58.7  | 9.09  |
| Q9H0E3 | Histone deacetylase complex subunit SAP130<br>OS=Homo sapiens<br>GN=SAP130<br>PE=1 SV=1 - [SP130_HUMAN] | 1.15  | 1   | 1 | 1  | 3   | 2.123 | 1.492 | 1.327 | 1.945 | 6.24   | 1.15  | 2  | 3   | 1048 | 110.3 | 9.83  |
| Q8TBF8 | Protein FAM81A<br>OS=Homo sapiens<br>GN=FAM81A<br>PE=2 SV=3 - [FAM81A_HUMAN]                            | 3.80  | 1   | 2 | 2  | 8   | 3.186 | 3.022 | 2.189 | 1.947 | 8.96   | 3.80  | 2  | 8   | 368  | 42.4  | 8.92  |
| Q15391 | P2Y purinoceptor 14<br>OS=Homo sapiens<br>GN=P2RY14<br>PE=1 SV=1 - [P2Y14_HUMAN]                        | 2.07  | 1   | 1 | 1  | 1   | 2.074 | 0.913 | 1.075 | 1.955 | 2.05   | 2.07  | 1  | 1   | 338  | 38.9  | 9.47  |
| P16403 | Histone H1.2<br>OS=Homo sapiens<br>GN=HIST1H1C<br>PE=1 SV=2 - [H12_HUMAN]                               | 38.03 | 2   | 3 | 17 | 144 | 2.914 | 5.997 | 1.204 | 1.955 | 299.82 | 38.03 | 25 | 144 | 213  | 21.4  | 10.93 |
| Q5XPI4 | E3 ubiquitin-protein ligase RNF123<br>OS=Homo sapiens<br>GN=RNF123<br>PE=1 SV=1 - [RNF123_HUMAN]        | 1.60  | 1   | 2 | 2  | 7   | 0.845 | 1.004 | 1.119 | 1.956 | 12.78  | 1.60  | 3  | 7   | 1314 | 148.4 | 6.74  |
| Q8TBP0 | TBC1 domain family member 16<br>OS=Homo sapiens<br>GN=TBC1D16<br>PE=2 SV=1 - [TBC16_HUMAN]              | 1.04  | 1   | 1 | 1  | 1   | 1.470 | 0.748 | 0.894 | 1.957 | 0.00   | 1.04  | 1  | 1   | 767  | 86.3  | 5.82  |

|        |                                                                                                                              |       |   |    |    |    |       |       |       |       |        |       |    |    |      |       |      |
|--------|------------------------------------------------------------------------------------------------------------------------------|-------|---|----|----|----|-------|-------|-------|-------|--------|-------|----|----|------|-------|------|
| P04818 | Thymidylate synthase<br>OS=Homo sapiens<br>GN=TYMS<br>PE=1 SV=3 - [TYSY_HUMAN]                                               | 16.29 | 1 | 3  | 3  | 15 | 1.747 | 0.694 | 0.488 | 1.958 | 45.01  | 16.29 | 4  | 15 | 313  | 35.7  | 7.01 |
| P29466 | Caspase-1<br>OS=Homo sapiens<br>GN=CASP1<br>PE=1 SV=1 - [CASP1_HUMAN]                                                        | 29.21 | 1 | 8  | 10 | 39 | 1.609 | 1.043 | 0.880 | 1.964 | 84.28  | 29.21 | 18 | 39 | 404  | 45.1  | 5.91 |
| P06493 | Cyclin-dependent kinase 1<br>OS=Homo sapiens<br>GN=CDK1<br>PE=1 SV=3 - [CDK1_HUMAN]                                          | 25.59 | 7 | 6  | 8  | 24 | 1.508 | 0.863 | 0.602 | 1.968 | 37.06  | 25.59 | 13 | 24 | 297  | 34.1  | 8.40 |
| O75762 | Transient receptor potential cation channel subfamily A member 1<br>OS=Homo sapiens<br>GN=TRPA1<br>PE=1 SV=3 - [TRPA1_HUMAN] | 21.27 | 1 | 21 | 21 | 76 | 5.154 | 0.696 | 1.090 | 1.969 | 163.96 | 21.27 | 33 | 76 | 1119 | 127.4 | 7.12 |
| Q9NPE3 | H/ACA ribonucleoprotein complex subunit 3<br>OS=Homo sapiens<br>GN=NOP10<br>PE=1 SV=1 - [NOP10_HUMAN]                        | 20.31 | 1 | 1  | 1  | 2  | 1.288 | 1.127 | 1.226 | 1.969 | 7.03   | 20.31 | 1  | 2  | 64   | 7.7   | 9.99 |
| Q8WWQ0 | PH-interacting protein<br>OS=Homo sapiens<br>GN=PHIP<br>PE=1 SV=2 - [PHIP_HUMAN]                                             | 1.21  | 1 | 2  | 2  | 4  | 1.017 | 1.548 | 1.018 | 1.976 | 6.48   | 1.21  | 3  | 4  | 1821 | 206.6 | 8.85 |
| Q9BZ72 | Membrane-associated phosphatidylinositol transfer protein 2<br>OS=Homo sapiens<br>GN=PITPNM2<br>PE=1 SV=1 - [PITM2_HUMAN]    | 1.63  | 1 | 2  | 2  | 2  | 1.946 | 0.574 | 0.657 | 1.976 | 4.59   | 1.63  | 2  | 2  | 1349 | 148.8 | 7.17 |
| Q8TF61 | F-box only protein 41<br>OS=Homo sapiens<br>GN=FBXO41<br>PE=2 SV=5 - [FBX41_HUMAN]                                           | 0.91  | 1 | 1  | 1  | 2  | 1.249 | 2.179 | 2.930 | 1.983 | 2.94   | 0.91  | 1  | 2  | 875  | 94.4  | 8.24 |

|        |                                                                                                            |       |   |   |    |    |       |       |       |       |       |       |    |    |      |       |      |
|--------|------------------------------------------------------------------------------------------------------------|-------|---|---|----|----|-------|-------|-------|-------|-------|-------|----|----|------|-------|------|
| P14174 | Macrophage migration inhibitory factor<br>OS=Homo sapiens<br>GN=MIF PE=1 SV=4 - [MIF_HUMAN]                | 17.39 | 1 | 2 | 2  | 3  | 2.782 | 1.796 | 0.948 | 1.988 | 4.74  | 17.39 | 3  | 3  | 115  | 12.5  | 7.88 |
| P43235 | Cathepsin K<br>OS=Homo sapiens<br>GN=CTSK PE=1 SV=1 - [CATK_HUMAN]                                         | 7.60  | 2 | 5 | 6  | 23 | 6.187 | 1.076 | 1.036 | 1.994 | 39.53 | 7.60  | 9  | 23 | 329  | 36.9  | 8.48 |
| Q8TDX9 | Polycystic kidney disease protein 1-like 1<br>OS=Homo sapiens<br>GN=PKD1L1 PE=1 SV=1 - [PK1L1_HUMAN]       | 1.47  | 1 | 2 | 2  | 3  | 1.092 | 1.948 | 2.079 | 1.995 | 7.19  | 1.47  | 2  | 3  | 2849 | 315.2 | 7.06 |
| Q6ZSB9 | Zinc finger and BTB domain-containing protein 49<br>OS=Homo sapiens<br>GN=ZBTB49 PE=2 SV=3 - [ZBT49_HUMAN] | 1.70  | 1 | 1 | 1  | 1  | 1.279 | 1.283 | 0.991 | 2.011 | 0.00  | 1.70  | 1  | 1  | 765  | 85.0  | 6.98 |
| O15068 | Guanine nucleotide exchange factor DBS<br>OS=Homo sapiens<br>GN=MCF2L PE=1 SV=2 - [MCF2L_HUMAN]            | 3.61  | 1 | 2 | 2  | 3  | 1.281 | 1.252 | 0.446 | 2.013 | 3.18  | 3.61  | 2  | 3  | 1137 | 128.0 | 6.43 |
| Q05193 | Dynamin-1<br>OS=Homo sapiens<br>GN=DNM1 PE=1 SV=2 - [DYN1_HUMAN]                                           | 11.46 | 1 | 1 | 12 | 49 | 1.034 | 1.179 | 1.013 | 2.013 | 90.40 | 11.46 | 20 | 49 | 864  | 97.3  | 7.17 |
| Q9HBZ2 | Aryl hydrocarbon receptor nuclear translocator 2<br>OS=Homo sapiens<br>GN=ARNT2 PE=1 SV=2 - [ARNT2_HUMAN]  | 4.04  | 1 | 2 | 3  | 3  |       |       |       | 2.016 | 4.18  | 4.04  | 3  | 3  | 717  | 78.6  | 6.71 |
| Q8WUU5 | GATA zinc finger domain-containing protein 1<br>OS=Homo sapiens<br>GN=GATAD1 PE=1 SV=1 - [GATD1_HUMAN]     | 4.83  | 1 | 1 | 1  | 1  | 1.112 | 1.298 | 1.072 | 2.018 | 0.00  | 4.83  | 1  | 1  | 269  | 28.7  | 9.41 |
| P02788 | Lactotransferrin<br>OS=Homo sapiens<br>GN=LTF PE=1 SV=6 - [TRFL_HUMAN]                                     | 6.06  | 1 | 4 | 4  | 12 | 1.251 | 0.717 | 1.070 | 2.029 | 18.58 | 6.06  | 6  | 12 | 710  | 78.1  | 8.12 |



|        |                                                                                                                             |       |   |   |   |    |       |       |       |       |       |       |    |    |      |       |      |
|--------|-----------------------------------------------------------------------------------------------------------------------------|-------|---|---|---|----|-------|-------|-------|-------|-------|-------|----|----|------|-------|------|
| P19021 | Peptidyl-glycine<br>alpha-<br>amidating<br>monooxygenase<br>OS=Homo<br>sapiens<br>GN=PAM PE=1<br>SV=2 -<br>[AMD_HUMAN]      | 2.67  | 1 | 2 | 2 | 6  | 0.937 | 1.537 | 0.727 | 2.031 | 15.57 | 2.67  | 3  | 6  | 973  | 108.3 | 6.42 |
| Q15413 | Ryanodine<br>receptor 3<br>OS=Homo<br>sapiens<br>GN=RYR3<br>PE=1 SV=3 -<br>[RYR3_HUMAN]                                     | 1.33  | 1 | 3 | 5 | 7  | 1.319 | 2.019 | 2.538 | 2.036 | 10.43 | 1.33  | 6  | 7  | 4870 | 551.7 | 5.68 |
| P0C091 | FRAS1-related<br>extracellular<br>matrix protein<br>3 OS=Homo<br>sapiens<br>GN=FREM3<br>PE=2 SV=2 -<br>[FREM3_HUMAN]        | 0.56  | 1 | 1 | 1 | 1  | 3.284 | 2.228 | 2.210 | 2.049 | 2.97  | 0.56  | 1  | 1  | 2139 | 238.0 | 5.33 |
| Q9P0L9 | Polycystic kidney<br>disease 2-like 1<br>protein<br>OS=Homo<br>sapiens<br>GN=PKD2L1<br>PE=1 SV=1 -<br>[PK2L1_HUMAN]         | 2.86  | 1 | 2 | 3 | 3  | 1.300 | 1.164 | 1.082 | 2.050 | 7.32  | 2.86  | 3  | 3  | 805  | 91.9  | 5.48 |
| Q8TDW0 | Volume-<br>regulated<br>anion channel<br>subunit LRRC8C<br>OS=Homo<br>sapiens<br>GN=LRRC8C<br>PE=1 SV=2 -<br>[LRRC8C_HUMAN] | 9.84  | 1 | 5 | 7 | 18 | 2.140 | 1.386 | 0.922 | 2.060 | 40.11 | 9.84  | 10 | 18 | 803  | 92.4  | 7.62 |
| Q14566 | DNA replication<br>licensing factor<br>MCM6<br>OS=Homo<br>sapiens<br>GN=MCM6<br>PE=1 SV=1 -<br>[MCM6_HUMAN]                 | 9.01  | 1 | 7 | 8 | 20 | 1.259 | 1.250 | 0.593 | 2.061 | 44.17 | 9.01  | 11 | 20 | 821  | 92.8  | 5.41 |
| Q9H582 | Zinc finger<br>protein 644<br>OS=Homo<br>sapiens<br>GN=ZNF644<br>PE=1 SV=2 -<br>[ZNF644_HUMAN]                              | 0.68  | 1 | 1 | 1 | 1  | 9.213 | 3.958 | 4.110 | 2.063 | 2.10  | 0.68  | 1  | 1  | 1327 | 149.5 | 8.16 |
| Q96RD1 | Olfactory<br>receptor 6C1<br>OS=Homo<br>sapiens<br>GN=OR6C1<br>PE=2 SV=2 -<br>[OR6C1_HUMAN]                                 | 11.86 | 1 | 2 | 2 | 2  | 0.101 | 0.664 | 1.344 | 2.064 | 5.25  | 11.86 | 2  | 2  | 312  | 35.6  | 8.82 |
| Q96D53 | AarF domain-<br>containing<br>protein kinase<br>4 OS=Homo<br>sapiens<br>GN=ADCK4<br>PE=1 SV=2 -<br>[ADCK4_HUMAN]            | 1.65  | 1 | 1 | 1 | 2  | 1.239 | 3.164 | 1.169 | 2.064 | 6.73  | 1.65  | 1  | 2  | 544  | 60.0  | 7.23 |

|        |                                                                                                                                     |       |   |   |    |     |       |       |       |       |        |       |    |     |      |       |       |
|--------|-------------------------------------------------------------------------------------------------------------------------------------|-------|---|---|----|-----|-------|-------|-------|-------|--------|-------|----|-----|------|-------|-------|
| Q96DF8 | Protein<br>DGCR14<br>OS=Homo<br>sapiens<br>GN=DGCR14<br>PE=1 SV=1 -<br>[DGC14_HUMAN<br>]<br>Rho GTPase-<br>activating<br>protein 42 | 7.14  | 1 | 2 | 2  | 5   | 1.747 | 0.856 | 1.148 | 2.065 | 14.05  | 7.14  | 3  | 5   | 476  | 52.5  | 7.56  |
| A6NI28 | OS=Homo<br>sapiens<br>GN=ARHGAP42<br>PE=1 SV=3 -<br>[RHG42_HUMAN<br>]                                                               | 3.66  | 1 | 2 | 3  | 6   | 1.260 | 0.617 | 1.267 | 2.069 | 14.80  | 3.66  | 5  | 6   | 874  | 98.5  | 7.99  |
| P10145 | Interleukin-8<br>OS=Homo<br>sapiens<br>GN=CXCL8<br>PE=1 SV=1 -<br>[IL8_HUMAN]                                                       | 9.09  | 1 | 1 | 1  | 2   | 3.703 | 0.989 | 0.432 | 2.084 | 0.00   | 9.09  | 2  | 2   | 99   | 11.1  | 8.84  |
| P02768 | Serum albumin<br>OS=Homo<br>sapiens<br>GN=ALB PE=1<br>SV=2 -<br>[ALBU_HUMAN]                                                        | 7.72  | 1 | 6 | 6  | 221 | 1.672 | 0.657 | 1.167 | 2.084 | 404.63 | 7.72  | 10 | 221 | 609  | 69.3  | 6.28  |
| P10412 | Histone H1.4<br>OS=Homo<br>sapiens<br>GN=HIST1H1E<br>PE=1 SV=2 -<br>[H14_HUMAN]                                                     | 39.73 | 2 | 2 | 16 | 144 | 1.785 | 3.548 | 1.074 | 2.091 | 306.76 | 39.73 | 24 | 144 | 219  | 21.9  | 11.03 |
| Q92982 | Ninjurin-1<br>OS=Homo<br>sapiens<br>GN=NIN1<br>PE=1 SV=2 -<br>[NIN1_HUMAN]                                                          | 7.89  | 1 | 1 | 1  | 4   | 1.733 | 1.013 | 1.356 | 2.100 | 8.20   | 7.89  | 2  | 4   | 152  | 16.3  | 6.28  |
| Q96HU8 | GTP-binding<br>protein D-Ras2<br>OS=Homo<br>sapiens<br>GN=DIRAS2<br>PE=1 SV=1 -<br>[DIRA2_HUMAN<br>]                                | 5.53  | 1 | 1 | 1  | 2   | 2.255 | 4.577 | 6.397 | 2.119 | 1.64   | 5.53  | 2  | 2   | 199  | 22.5  | 8.76  |
| Q9P0V9 | Septin-10<br>OS=Homo<br>sapiens<br>GN=SEPT10<br>PE=1 SV=2 -<br>[SEP10_HUMAN<br>]                                                    | 23.57 | 1 | 6 | 8  | 17  | 2.621 | 1.900 | 1.800 | 2.128 | 42.90  | 23.57 | 11 | 17  | 454  | 52.6  | 6.80  |
| P00749 | Urokinase-type<br>plasminogen<br>activator<br>OS=Homo<br>sapiens<br>GN=PLAU PE=1<br>SV=2 -<br>[UROK_HUMAN]                          | 4.87  | 1 | 2 | 2  | 5   | 2.677 | 0.956 | 0.469 | 2.132 | 7.41   | 4.87  | 3  | 5   | 431  | 48.5  | 8.41  |
| Q9NQW6 | Actin-binding<br>protein anillin<br>OS=Homo<br>sapiens<br>GN=ANLN PE=1<br>SV=2 -<br>[ANLN_HUMAN]                                    | 7.38  | 1 | 9 | 9  | 12  | 1.285 | 1.141 | 0.692 | 2.140 | 24.79  | 7.38  | 9  | 12  | 1124 | 124.1 | 8.07  |

|        |                                                                                                                                |       |   |   |   |    |       |       |       |       |       |       |   |    |     |      |       |
|--------|--------------------------------------------------------------------------------------------------------------------------------|-------|---|---|---|----|-------|-------|-------|-------|-------|-------|---|----|-----|------|-------|
| Q3YBM2 | Transmembrane protein 176B<br>OS=Homo sapiens<br>GN=TMEM176B<br>PE=2 SV=2 - [T176B_HUMAN]                                      | 10.74 | 1 | 4 | 4 | 40 | 1.904 | 0.706 | 0.313 | 2.146 | 89.78 | 10.74 | 8 | 40 | 270 | 29.0 | 8.48  |
| Q96T21 | Selenocysteine insertion sequence-binding protein 2<br>OS=Homo sapiens<br>GN=SECISBP2<br>PE=1 SV=2 - [SEBP2_HUMAN]             | 0.82  | 1 | 1 | 1 | 1  | 1.543 | 2.682 | 1.897 | 2.146 | 0.00  | 0.82  | 1 | 1  | 854 | 95.4 | 8.12  |
| Q96QE2 | Proton myo-inositol cotransporter<br>OS=Homo sapiens<br>GN=SLC2A13<br>PE=1 SV=3 - [MYCT_HUMAN]                                 | 5.56  | 1 | 3 | 3 | 3  | 1.781 | 0.880 | 0.455 | 2.150 | 11.16 | 5.56  | 3 | 3  | 648 | 70.3 | 5.96  |
| Q8WYH8 | Inhibitor of growth protein 5<br>OS=Homo sapiens<br>GN=ING5 PE=1 SV=1 - [ING5_HUMAN]                                           | 3.33  | 1 | 1 | 1 | 2  | 1.007 | 1.133 | 0.973 | 2.150 | 5.34  | 3.33  | 2 | 2  | 240 | 27.7 | 7.61  |
| Q15651 | High mobility group nucleosome-binding domain-containing protein 3<br>OS=Homo sapiens<br>GN=HMGN3<br>PE=1 SV=2 - [HMGN3_HUMAN] | 13.13 | 1 | 1 | 1 | 8  |       |       | 1.307 | 2.155 | 6.81  | 13.13 | 1 | 8  | 99  | 10.7 | 9.66  |
| Q7Z7L8 | Uncharacterized protein C11orf96<br>OS=Homo sapiens<br>GN=C11orf96<br>PE=1 SV=3 - [CK096_HUMAN]                                | 5.52  | 1 | 2 | 2 | 8  | 2.134 | 1.187 | 1.625 | 2.158 | 14.21 | 5.52  | 3 | 8  | 435 | 46.1 | 9.99  |
| Q6AZY7 | Scavenger receptor class A member 3<br>OS=Homo sapiens<br>GN=SCARA3<br>PE=2 SV=1 - [SCAR3_HUMAN]                               | 4.79  | 1 | 2 | 2 | 6  | 1.030 | 2.122 | 1.942 | 2.161 | 14.99 | 4.79  | 3 | 6  | 606 | 65.1 | 6.54  |
| Q96FF7 | Uncharacterized protein LOC113230<br>OS=Homo sapiens<br>PE=2 SV=4 - [YS003_HUMAN]                                              | 9.13  | 1 | 2 | 2 | 3  | 1.077 | 1.104 | 1.187 | 2.168 | 2.05  | 9.13  | 2 | 3  | 219 | 24.0 | 10.92 |

|        |                                                                                                                                                        |       |   |    |    |    |       |       |       |       |        |       |    |    |      |       |      |
|--------|--------------------------------------------------------------------------------------------------------------------------------------------------------|-------|---|----|----|----|-------|-------|-------|-------|--------|-------|----|----|------|-------|------|
| P61952 | Guanine<br>nucleotide-<br>binding protein<br>G(I)/G(S)/G(O)<br>subunit gamma-<br>11 OS=Homo<br>sapiens<br>GN=GNG11<br>PE=1 SV=1 -<br>[GBG11_HUMAN<br>] | 30.14 | 2 | 2  | 3  | 8  | 3.981 | 0.649 | 0.777 | 2.175 | 15.48  | 30.14 | 4  | 8  | 73   | 8.5   | 5.54 |
| Q8N6K7 | Sterile alpha<br>motif domain-<br>containing<br>protein 3<br>OS=Homo<br>sapiens<br>GN=SAMD3<br>PE=1 SV=2 -<br>[SAMD3_HUMA<br>N]                        | 2.12  | 1 | 1  | 1  | 1  | 1.702 | 0.490 | 0.895 | 2.178 | 2.71   | 2.12  | 1  | 1  | 520  | 61.2  | 7.09 |
| O14523 | C2 domain-<br>containing<br>protein 2-like<br>OS=Homo<br>sapiens<br>GN=C2CD2L<br>PE=1 SV=3 -<br>[C2C2L_HUMAN<br>]                                      | 1.42  | 1 | 1  | 1  | 2  | 1.709 | 0.989 | 1.511 | 2.180 | 5.20   | 1.42  | 2  | 2  | 706  | 76.1  | 7.69 |
| Q9UK73 | Protein fem-1<br>homolog B<br>OS=Homo<br>sapiens<br>GN=FEM1B<br>PE=1 SV=1 -<br>[FEM1B_HUMA<br>N]                                                       | 4.15  | 1 | 2  | 2  | 6  | 0.851 | 1.156 | 0.787 | 2.182 | 15.29  | 4.15  | 3  | 6  | 627  | 70.2  | 6.61 |
| P46013 | Antigen KI-67<br>OS=Homo<br>sapiens<br>GN=MKI67<br>PE=1 SV=2 -<br>[KI67_HUMAN]                                                                         | 3.53  | 1 | 7  | 7  | 16 | 1.179 | 1.191 | 0.713 | 2.195 | 35.58  | 3.53  | 9  | 16 | 3256 | 358.5 | 9.45 |
| Q9BZJ0 | Crooked neck-<br>like protein 1<br>OS=Homo<br>sapiens<br>GN=CRNKL1<br>PE=1 SV=4 -<br>[CRNL1_HUMAN<br>]                                                 | 6.25  | 1 | 4  | 4  | 5  | 1.030 | 1.452 | 2.351 | 2.199 | 11.31  | 6.25  | 5  | 5  | 848  | 100.4 | 8.00 |
| P33992 | DNA replication<br>licensing factor<br>MCM5<br>OS=Homo<br>sapiens<br>GN=MCM5<br>PE=1 SV=5 -<br>[MCM5_HUMAN<br>]                                        | 25.89 | 1 | 17 | 17 | 55 | 1.457 | 1.266 | 0.670 | 2.203 | 121.59 | 25.89 | 25 | 55 | 734  | 82.2  | 8.37 |
| Q9Y2P4 | Long-chain<br>fatty acid<br>transport<br>protein 6<br>OS=Homo<br>sapiens<br>GN=SLC27A6<br>PE=1 SV=1 -<br>[S27A6_HUMAN<br>]                             | 4.52  | 1 | 3  | 3  | 3  | 4.458 | 1.283 | 0.537 | 2.218 | 7.52   | 4.52  | 3  | 3  | 619  | 70.1  | 8.51 |

|        |                                                                                                               |       |   |    |    |    |       |       |       |       |       |       |    |    |      |       |      |
|--------|---------------------------------------------------------------------------------------------------------------|-------|---|----|----|----|-------|-------|-------|-------|-------|-------|----|----|------|-------|------|
| Q15437 | Protein transport protein Sec23B<br>OS=Homo sapiens<br>GN=SEC23B<br>PE=1 SV=2 - [SC23B_HUMAN]                 | 3.91  | 1 | 2  | 3  | 14 | 1.226 | 0.571 | 0.563 | 2.243 | 31.37 | 3.91  | 4  | 14 | 767  | 86.4  | 6.89 |
| P25205 | DNA replication licensing factor MCM3<br>OS=Homo sapiens<br>GN=MCM3<br>PE=1 SV=3 - [MCM3_HUMAN]               | 12.62 | 1 | 10 | 10 | 21 | 1.379 | 1.334 | 0.654 | 2.250 | 50.56 | 12.62 | 16 | 21 | 808  | 90.9  | 5.77 |
| P22735 | Protein-glutamine gamma-glutamyltransferase K<br>OS=Homo sapiens<br>GN=TGM1<br>PE=1 SV=4 - [TGM1_HUMAN]       | 1.84  | 1 | 1  | 1  | 1  | 1.900 | 3.041 | 4.988 | 2.267 | 0.00  | 1.84  | 1  | 1  | 817  | 89.7  | 6.04 |
| Q8NCL9 | Protein APCDD1-like<br>OS=Homo sapiens<br>GN=APCDD1L<br>PE=2 SV=1 - [APCDL_HUMAN]                             | 4.79  | 1 | 2  | 2  | 3  | 0.567 | 0.913 | 1.207 | 2.292 | 7.04  | 4.79  | 3  | 3  | 501  | 55.6  | 8.85 |
| Q9UJA2 | Cardiolipin synthase<br>OS=Homo sapiens<br>GN=CRLS1<br>PE=2 SV=1 - [CRLS1_HUMAN]                              | 4.32  | 1 | 1  | 1  | 1  | 1.688 | 0.884 | 1.756 | 2.304 | 3.82  | 4.32  | 1  | 1  | 301  | 32.6  | 9.67 |
| Q0VF96 | Cingulin-like protein 1<br>OS=Homo sapiens<br>GN=CGNL1<br>PE=1 SV=2 - [CGNL1_HUMAN]                           | 1.69  | 1 | 1  | 2  | 3  | 0.650 | 0.659 | 1.793 | 2.307 | 4.28  | 1.69  | 2  | 3  | 1302 | 149.0 | 5.67 |
| Q99856 | AT-rich interactive domain-containing protein 3A<br>OS=Homo sapiens<br>GN=ARID3A<br>PE=1 SV=2 - [ARI3A_HUMAN] | 1.52  | 1 | 1  | 1  | 1  | 2.253 | 1.503 | 1.132 | 2.317 | 0.00  | 1.52  | 1  | 1  | 593  | 62.9  | 4.91 |
| Q5U5Z8 | Cytosolic carboxypeptidase 2<br>OS=Homo sapiens<br>GN=AGBL2<br>PE=1 SV=2 - [CBPC2_HUMAN]                      | 2.44  | 1 | 1  | 2  | 2  |       | 1.637 |       | 2.322 | 3.87  | 2.44  | 2  | 2  | 902  | 104.1 | 9.00 |

|        |                                                                                                                              |       |   |   |   |    |       |       |       |       |        |       |    |    |      |       |      |
|--------|------------------------------------------------------------------------------------------------------------------------------|-------|---|---|---|----|-------|-------|-------|-------|--------|-------|----|----|------|-------|------|
| P31323 | cAMP-dependent protein kinase type II-beta regulatory subunit<br>OS=Homo sapiens<br>GN=PRKAR2B<br>PE=1 SV=3 - [KAP3_HUMAN]   | 28.95 | 1 | 6 | 9 | 39 | 3.149 | 1.852 | 1.087 | 2.339 | 135.21 | 28.95 | 14 | 39 | 418  | 46.3  | 4.92 |
| P14384 | Carboxypeptidase M<br>OS=Homo sapiens<br>GN=CPM<br>PE=1 SV=2 - [CBPM_HUMAN]                                                  | 7.45  | 1 | 3 | 3 | 5  | 0.350 | 4.760 | 0.475 | 2.340 | 11.75  | 7.45  | 4  | 5  | 443  | 50.5  | 7.36 |
| Q9HCF6 | Transient receptor potential cation channel subfamily M member 3<br>OS=Homo sapiens<br>GN=TRPM3<br>PE=2 SV=4 - [TRPM3_HUMAN] | 2.60  | 1 | 3 | 3 | 6  | 3.060 | 0.393 | 1.960 | 2.354 | 1.84   | 2.60  | 3  | 6  | 1732 | 197.4 | 7.15 |
| P23975 | Sodium-dependent noradrenaline transporter<br>OS=Homo sapiens<br>GN=SLC6A2<br>PE=1 SV=1 - [SC6A2_HUMAN]                      | 1.94  | 1 | 1 | 1 | 1  |       |       |       | 2.366 | 2.43   | 1.94  | 1  | 1  | 617  | 69.3  | 7.47 |
| P02765 | Alpha-2-HS-glycoprotein<br>OS=Homo sapiens<br>GN=AHSG<br>PE=1 SV=1 - [FETUA_HUMAN]                                           | 7.08  | 1 | 3 | 3 | 14 | 1.749 | 0.526 | 0.961 | 2.370 | 36.83  | 7.08  | 3  | 14 | 367  | 39.3  | 5.72 |
| Q5H9E4 | Solute carrier family 25 member 53<br>OS=Homo sapiens<br>GN=SLC25A53<br>PE=2 SV=1 - [S2553_HUMAN]                            | 2.93  | 1 | 1 | 1 | 2  |       |       |       | 2.370 | 2.94   | 2.93  | 1  | 2  | 307  | 34.5  | 9.85 |
| Q8IY51 | Tigger transposable element-derived protein 4<br>OS=Homo sapiens<br>GN=TIJD4<br>PE=2 SV=2 - [TIJD4_HUMAN]                    | 2.93  | 1 | 1 | 1 | 1  | 1.739 | 3.256 | 2.329 | 2.374 | 1.97   | 2.93  | 1  | 1  | 512  | 57.4  | 6.39 |
| Q9BQI5 | SH3-containing GRB2-like protein 3-interacting protein 1<br>OS=Homo sapiens<br>GN=SGIP1<br>PE=1 SV=2 - [SGIP1_HUMAN]         | 2.66  | 1 | 1 | 1 | 6  | 1.817 | 1.211 | 1.165 | 2.382 | 16.75  | 2.66  | 2  | 6  | 828  | 89.1  | 8.22 |

|        |                                                                                                                       |       |   |    |    |    |       |       |       |       |        |       |    |    |      |       |       |
|--------|-----------------------------------------------------------------------------------------------------------------------|-------|---|----|----|----|-------|-------|-------|-------|--------|-------|----|----|------|-------|-------|
| Q7Z5K2 | Wings apart-like protein homolog<br>OS=Homo sapiens<br>GN=WAPAL<br>PE=1 SV=1 - [WAPL_HUMAN]                           | 1.34  | 1 | 2  | 2  | 5  | 2.584 | 3.208 | 1.751 | 2.385 | 6.76   | 1.34  | 2  | 5  | 1190 | 132.9 | 5.44  |
| Q52M75 | Putative uncharacterized protein encoded by LINC01554<br>OS=Homo sapiens<br>GN=LINC01554<br>PE=2 SV=2 - [CE027_HUMAN] | 14.58 | 1 | 1  | 1  | 1  | 1.771 | 1.967 | 2.289 | 2.398 | 0.00   | 14.58 | 1  | 1  | 96   | 10.8  | 9.88  |
| Q8TF68 | Zinc finger protein 384<br>OS=Homo sapiens<br>GN=ZNF384<br>PE=1 SV=2 - [ZNF384_HUMAN]                                 | 4.33  | 1 | 1  | 1  | 1  | 1.597 | 1.173 | 1.289 | 2.405 | 5.21   | 4.33  | 1  | 1  | 577  | 63.2  | 8.95  |
| P37059 | Estradiol 17-beta-dehydrogenase 2<br>OS=Homo sapiens<br>GN=HSD17B2<br>PE=1 SV=1 - [DHB2_HUMAN]                        | 37.73 | 1 | 12 | 12 | 55 | 5.723 | 0.677 | 1.561 | 2.406 | 157.37 | 37.73 | 19 | 55 | 387  | 42.8  | 8.50  |
| Q8NI17 | Interleukin-31 receptor subunit alpha<br>OS=Homo sapiens<br>GN=IL31RA<br>PE=1 SV=1 - [IL31R_HUMAN]                    | 3.28  | 1 | 1  | 2  | 6  | 5.201 | 0.967 | 1.350 | 2.408 | 6.79   | 3.28  | 2  | 6  | 732  | 82.9  | 7.09  |
| Q96HP8 | Transmembrane protein 176A<br>OS=Homo sapiens<br>GN=TMEM176A<br>PE=2 SV=1 - [T176A_HUMAN]                             | 4.68  | 1 | 2  | 2  | 7  | 0.778 | 1.004 | 0.590 | 2.419 | 17.40  | 4.68  | 2  | 7  | 235  | 26.1  | 8.56  |
| Q96I27 | Serine/Arginine-related protein 53<br>OS=Homo sapiens<br>GN=RSRC1<br>PE=1 SV=1 - [RSRC1_HUMAN]                        | 3.59  | 1 | 1  | 1  | 1  | 1.220 | 0.560 | 0.891 | 2.444 | 2.47   | 3.59  | 1  | 1  | 334  | 38.7  | 11.08 |
| P48740 | Mannan-binding lectin serine protease 1<br>OS=Homo sapiens<br>GN=MASP1<br>PE=1 SV=3 - [MASP1_HUMA]                    | 8.15  | 1 | 4  | 4  | 12 | 2.889 | 0.817 | 0.629 | 2.456 | 29.00  | 8.15  | 7  | 12 | 699  | 79.2  | 5.49  |

|        |                                                                                                                              |       |   |    |    |     |       |       |       |       |        |       |    |     |      |       |       |
|--------|------------------------------------------------------------------------------------------------------------------------------|-------|---|----|----|-----|-------|-------|-------|-------|--------|-------|----|-----|------|-------|-------|
| Q9BX84 | Transient receptor potential cation channel subfamily M member 6<br>OS=Homo sapiens<br>GN=TRPM6<br>PE=1 SV=2 - [TRPM6_HUMAN] | 0.59  | 1 | 1  | 1  | 1   | 3.950 | 3.853 | 6.066 | 2.497 | 2.50   | 0.59  | 1  | 1   | 2022 | 231.6 | 7.77  |
| Q14246 | EGF-like module-containing mucin-like hormone receptor-like 1<br>OS=Homo sapiens<br>GN=EMR1<br>PE=2 SV=3 - [EMR1_HUMAN]      | 1.81  | 1 | 1  | 1  | 1   | 6.526 | 4.476 | 0.702 | 2.507 | 0.00   | 1.81  | 1  | 1   | 886  | 97.6  | 6.80  |
| P49736 | DNA replication licensing factor MCM2<br>OS=Homo sapiens<br>GN=MCM2<br>PE=1 SV=4 - [MCM2_HUMAN]                              | 15.93 | 1 | 12 | 12 | 27  | 1.668 | 1.314 | 0.657 | 2.520 | 62.41  | 15.93 | 16 | 27  | 904  | 101.8 | 5.52  |
| Q71DI3 | Histone H3.2<br>OS=Homo sapiens<br>GN=HIST2HBA<br>PE=1 SV=3 - [H32_HUMAN]                                                    | 59.56 | 4 | 3  | 11 | 148 | 0.861 | 2.168 | 0.857 | 2.531 | 284.34 | 59.56 | 15 | 148 | 136  | 15.4  | 11.27 |
| Q9BZV3 | Interphotoreceptor matrix proteoglycan 2<br>OS=Homo sapiens<br>GN=IMPG2<br>PE=1 SV=3 - [IMPG2_HUMAN]                         | 1.53  | 1 | 1  | 1  | 4   | 1.721 | 0.931 | 1.378 | 2.535 | 0.00   | 1.53  | 1  | 4   | 1241 | 138.5 | 4.61  |
| Q9UBF8 | Phosphatidylinositol 4-kinase beta<br>OS=Homo sapiens<br>GN=PI4KB<br>PE=1 SV=1 - [PI4KB_HUMAN]                               | 4.41  | 1 | 2  | 2  | 3   | 1.715 | 3.672 | 1.935 | 2.538 | 2.85   | 4.41  | 2  | 3   | 816  | 91.3  | 6.25  |
| Q5TAT6 | Collagen alpha-1(XIII) chain<br>OS=Homo sapiens<br>GN=COL13A1<br>PE=1 SV=1 - [CODA1_HUMAN]                                   | 2.37  | 1 | 1  | 1  | 4   | 1.918 | 0.650 | 0.461 | 2.539 | 6.26   | 2.37  | 2  | 4   | 717  | 69.9  | 9.17  |
| Q9Y294 | Histone chaperone ASF1A<br>OS=Homo sapiens<br>GN=ASF1A<br>PE=1 SV=1 - [ASF1A_HUMAN]                                          | 11.27 | 2 | 2  | 2  | 7   | 2.345 | 1.168 | 1.271 | 2.541 | 13.14  | 11.27 | 3  | 7   | 204  | 23.0  | 4.41  |



|        |                                                                                                                      |       |   |    |    |    |       |       |       |       |        |       |    |    |      |       |      |
|--------|----------------------------------------------------------------------------------------------------------------------|-------|---|----|----|----|-------|-------|-------|-------|--------|-------|----|----|------|-------|------|
| P24557 | Thromboxane-A synthase<br>OS=Homo sapiens<br>GN=TBXAS1<br>PE=1 SV=3 - [THAS_HUMAN]                                   | 5.63  | 1 | 3  | 3  | 5  | 3.573 | 0.673 | 0.835 | 2.546 | 10.52  | 5.63  | 4  | 5  | 533  | 60.5  | 7.62 |
| Q9Y6X5 | Bis(5'-adenosyl)-triphosphatase<br>ENPP4<br>OS=Homo sapiens<br>GN=ENPP4<br>PE=1 SV=3 - [ENPP4_HUMAN]                 | 2.43  | 1 | 1  | 1  | 1  | 0.902 | 1.533 | 2.120 | 2.560 | 0.00   | 2.43  | 1  | 1  | 453  | 51.6  | 6.15 |
| Q9C0H9 | SRC kinase signaling inhibitor 1<br>OS=Homo sapiens<br>GN=SRCIN1<br>PE=1 SV=3 - [SRCIN1_HUMAN]                       | 3.41  | 1 | 1  | 2  | 2  |       |       | 3.715 | 2.562 | 4.45   | 3.41  | 2  | 2  | 1055 | 112.4 | 9.29 |
| Q13191 | E3 ubiquitin-protein ligase<br>CBL-B<br>OS=Homo sapiens<br>GN=CBLB PE=1 SV=2 - [CBLB_HUMAN]                          | 1.73  | 1 | 1  | 2  | 2  | 0.719 | 2.515 | 3.815 | 2.569 | 3.96   | 1.73  | 2  | 2  | 982  | 109.4 | 7.88 |
| Q9UBL3 | Set1/Ash2 histone methyltransferase complex subunit ASH2<br>OS=Homo sapiens<br>GN=ASH2L<br>PE=1 SV=1 - [ASH2L_HUMAN] | 9.87  | 1 | 7  | 7  | 11 | 0.790 | 1.566 | 1.269 | 2.574 | 19.06  | 9.87  | 10 | 11 | 628  | 68.7  | 5.69 |
| Q9Y6K8 | Adenylate kinase isoenzyme 5<br>OS=Homo sapiens<br>GN=AK5 PE=1 SV=2 - [KADS_HUMAN]                                   | 7.12  | 2 | 2  | 4  | 17 | 1.474 | 0.368 | 0.867 | 2.581 | 34.79  | 7.12  | 6  | 17 | 562  | 63.3  | 5.07 |
| Q8WV24 | Pleckstrin homology-like domain family A member 1<br>OS=Homo sapiens<br>GN=PHLDA1<br>PE=1 SV=4 - [PHLDA1_HUMAN]      | 2.24  | 1 | 1  | 1  | 6  | 3.063 | 1.600 | 1.551 | 2.627 | 15.94  | 2.24  | 2  | 6  | 401  | 45.0  | 9.89 |
| O60488 | Long-chain-fatty-acid--CoA ligase 4<br>OS=Homo sapiens<br>GN=ACSL4<br>PE=1 SV=2 - [ACSL4_HUMAN]                      | 31.36 | 1 | 18 | 22 | 81 | 4.512 | 0.790 | 0.768 | 2.634 | 214.71 | 31.36 | 32 | 81 | 711  | 79.1  | 8.38 |

|        |                                                                                                                                                  |       |   |    |    |     |       |       |        |       |         |       |    |     |      |       |       |
|--------|--------------------------------------------------------------------------------------------------------------------------------------------------|-------|---|----|----|-----|-------|-------|--------|-------|---------|-------|----|-----|------|-------|-------|
| Q96A09 | Protein<br>FAM46B<br>OS=Homo<br>sapiens<br>GN=FAM46B<br>PE=2 SV=2 -<br>[FA46B_HUMAN<br>]                                                         | 2.82  | 1 | 1  | 1  | 1   | 9.988 | 1.287 | 1.575  | 2.637 | 2.73    | 2.82  | 1  | 1   | 425  | 46.7  | 8.15  |
| P48681 | Nestin<br>OS=Homo<br>sapiens<br>GN=NES PE=1<br>SV=2 -<br>[NEST_HUMAN]                                                                            | 35.53 | 2 | 51 | 51 | 271 | 1.878 | 1.087 | 1.820  | 2.657 | 709.69  | 35.53 | 90 | 271 | 1621 | 177.3 | 4.36  |
| Q96KK5 | Histone H2A<br>type 1-H<br>OS=Homo<br>sapiens<br>GN=HIST1H2AH<br>PE=1 SV=3 -<br>[H2A1H_HUMAN<br>]                                                | 21.09 | 8 | 1  | 5  | 85  | 2.975 | 6.661 | 2.988  | 2.663 | 188.84  | 21.09 | 9  | 85  | 128  | 13.9  | 10.89 |
| Q8WWM9 | Cytoglobin<br>OS=Homo<br>sapiens<br>GN=CYGB<br>PE=1 SV=1 -<br>[CYGB_HUMAN]                                                                       | 32.63 | 1 | 7  | 7  | 33  | 5.935 | 0.410 | 0.515  | 2.693 | 76.93   | 32.63 | 9  | 33  | 190  | 21.4  | 6.80  |
| Q8IW75 | Serpin A12<br>OS=Homo<br>sapiens<br>GN=SERPINA12<br>PE=1 SV=1 -<br>[SPA12_HUMAN<br>]                                                             | 4.11  | 1 | 1  | 1  | 1   | 0.630 | 6.232 | 15.974 | 2.739 | 0.00    | 4.11  | 1  | 1   | 414  | 47.1  | 9.29  |
| P21980 | Protein-<br>glutamine<br>gamma-<br>glutamyltransfe<br>rase 2<br>OS=Homo<br>sapiens<br>GN=TGM2<br>PE=1 SV=2 -<br>[TGM2_HUMAN]                     | 63.32 | 1 | 36 | 36 | 806 | 1.854 | 2.644 | 2.095  | 2.774 | 2142.91 | 63.32 | 63 | 806 | 687  | 77.3  | 5.22  |
| Q2KHR3 | Glutamine and<br>serine-rich<br>protein 1<br>OS=Homo<br>sapiens<br>GN=QSER1<br>PE=1 SV=3 -<br>[QSER1_HUMA<br>N]                                  | 0.63  | 1 | 1  | 1  | 1   | 1.744 | 2.518 | 1.020  | 2.805 | 2.08    | 0.63  | 1  | 1   | 1735 | 189.9 | 7.08  |
| O60262 | Guanine<br>nucleotide-<br>binding protein<br>G(i1)/G(s)/G(o)<br>subunit gamma-<br>7 OS=Homo<br>sapiens<br>GN=GNG7<br>PE=1 SV=1 -<br>[GBG7_HUMAN] | 47.06 | 1 | 2  | 3  | 10  | 0.979 | 1.204 | 1.220  | 2.813 | 30.56   | 47.06 | 3  | 10  | 68   | 7.5   | 8.51  |
| Q9BXR6 | Complement<br>factor H-<br>related protein<br>5 OS=Homo<br>sapiens<br>GN=CFHR5<br>PE=1 SV=1 -<br>[FHR5_HUMAN]                                    | 2.46  | 1 | 1  | 1  | 1   | 3.267 | 1.034 | 1.047  | 2.853 | 0.00    | 2.46  | 1  | 1   | 569  | 64.4  | 7.06  |

|        |                                                                                                         |      |   |   |   |   |       |       |       |       |       |      |   |   |      |       |      |
|--------|---------------------------------------------------------------------------------------------------------|------|---|---|---|---|-------|-------|-------|-------|-------|------|---|---|------|-------|------|
| P15863 | Paired box protein Pax-1<br>OS=Homo sapiens<br>GN=PAX1<br>PE=1 SV=4 - [PAX1_HUMAN]                      | 2.62 | 1 | 1 | 1 | 1 | 2.248 | 3.397 | 6.609 | 2.866 | 0.00  | 2.62 | 1 | 1 | 534  | 55.5  | 9.86 |
| P59797 | Selenoprotein V OS=Homo sapiens<br>GN=SELV PE=2 SV=2 - [SELV_HUMAN]                                     | 2.60 | 1 | 1 | 1 | 1 | 0.516 | 1.891 | 3.082 | 2.884 | 0.00  | 2.60 | 1 | 1 | 346  | 36.8  | 9.66 |
| Q15858 | Sodium channel protein type 9 subunit alpha<br>OS=Homo sapiens<br>GN=SCN9A<br>PE=1 SV=3 - [SCN9A_HUMAN] | 0.70 | 1 | 1 | 1 | 1 | 0.848 | 0.689 |       | 2.888 | 2.98  | 0.70 | 1 | 1 | 1988 | 226.2 | 6.93 |
| Q9BQE4 | Selenoprotein S OS=Homo sapiens<br>GN=VIMP<br>PE=1 SV=3 - [SELS_HUMAN]                                  | 9.52 | 1 | 1 | 2 | 8 | 1.987 | 1.080 | 2.713 | 2.947 | 24.12 | 9.52 | 2 | 8 | 189  | 21.2  | 9.70 |
| Q5JS37 | NHL repeat-containing protein 3<br>OS=Homo sapiens<br>GN=NHLRC3<br>PE=2 SV=1 - [NHLRC3_HUMAN]           | 3.46 | 1 | 1 | 1 | 1 | 2.053 | 1.213 | 0.915 | 2.949 | 0.00  | 3.46 | 1 | 1 | 347  | 38.3  | 6.43 |
| Q68G74 | LIM/homeobox protein Lhx8<br>OS=Homo sapiens<br>GN=LHX8 PE=2 SV=2 - [LHX8_HUMAN]                        | 4.21 | 1 | 1 | 1 | 1 | 2.405 | 1.671 | 4.187 | 2.960 | 2.10  | 4.21 | 1 | 1 | 356  | 39.3  | 8.22 |
| Q12834 | Cell division cycle protein 20 homolog<br>OS=Homo sapiens<br>GN=CDC20<br>PE=1 SV=2 - [CDC20_HUMAN]      | 2.40 | 1 | 1 | 1 | 2 | 1.470 | 1.136 | 0.806 | 2.979 | 3.08  | 2.40 | 2 | 2 | 499  | 54.7  | 9.23 |
| Q5TG10 | Failed axon connections homolog<br>OS=Homo sapiens<br>GN=FAXC<br>PE=2 SV=2 - [FAXC_HUMAN]               | 3.67 | 1 | 1 | 1 | 1 | 0.885 | 0.951 | 1.224 | 2.999 | 3.07  | 3.67 | 1 | 1 | 409  | 46.8  | 5.57 |
| Q96NH3 | Protein broad-minded<br>OS=Homo sapiens<br>GN=TBC1D32<br>PE=2 SV=4 - [BROMI_HUMAN]                      | 0.72 | 1 | 1 | 1 | 1 | 4.030 | 4.234 | 4.519 | 3.006 | 0.00  | 0.72 | 1 | 1 | 1257 | 144.7 | 6.74 |

|        |                                                                                                                 |       |     |   |   |    |       |       |       |       |        |       |    |    |      |       |      |
|--------|-----------------------------------------------------------------------------------------------------------------|-------|-----|---|---|----|-------|-------|-------|-------|--------|-------|----|----|------|-------|------|
| P17040 | Zinc finger and SCAN domain-containing protein 20<br>OS=Homo sapiens<br>GN=ZSCAN20<br>PE=2 SV=3 - [ZSC20_HUMAN] | 6.04  | 120 | 1 | 3 | 5  | 1.151 | 0.677 | 1.872 | 3.082 | 4.44   | 6.04  | 4  | 5  | 1043 | 117.5 | 6.43 |
| P23141 | Liver carboxylesterase 1<br>OS=Homo sapiens<br>GN=CES1<br>PE=1 SV=2 - [EST1_HUMAN]                              | 19.05 | 2   | 9 | 9 | 30 | 0.589 | 1.381 | 0.663 | 3.163 | 64.11  | 19.05 | 17 | 30 | 567  | 62.5  | 6.60 |
| P07477 | Trypsin-1<br>OS=Homo sapiens<br>GN=PRSS1<br>PE=1 SV=1 - [TRY1_HUMAN]                                            | 7.29  | 2   | 2 | 2 | 8  | 1.517 | 1.015 | 1.227 | 3.173 | 10.65  | 7.29  | 3  | 8  | 247  | 26.5  | 6.51 |
| Q9H720 | PGAP2-interacting protein<br>OS=Homo sapiens<br>GN=CWH43<br>PE=2 SV=2 - [PG2IP_HUMAN]                           | 2.43  | 1   | 1 | 1 | 1  | 1.868 | 1.406 | 1.696 | 3.183 | 2.23   | 2.43  | 1  | 1  | 699  | 78.5  | 8.57 |
| Q9ULQ1 | Two pore calcium channel protein 1<br>OS=Homo sapiens<br>GN=TPCN1<br>PE=1 SV=3 - [TPC1_HUMAN]                   | 2.82  | 1   | 1 | 2 | 3  | 1.724 | 0.733 | 0.583 | 3.230 | 7.90   | 2.82  | 3  | 3  | 816  | 94.1  | 8.27 |
| O15055 | Period circadian protein homolog 2<br>OS=Homo sapiens<br>GN=PER2<br>PE=1 SV=2 - [PER2_HUMAN]                    | 0.64  | 1   | 1 | 1 | 1  | 0.781 | 3.315 | 2.809 | 3.261 | 0.00   | 0.64  | 1  | 1  | 1255 | 136.5 | 6.47 |
| P05204 | Non-histone chromosomal protein HMG-17<br>OS=Homo sapiens<br>GN=HMGN2<br>PE=1 SV=3 - [HMGN2_HUMAN]              | 53.33 | 1   | 5 | 5 | 42 | 2.501 | 5.571 | 2.357 | 3.330 | 119.92 | 53.33 | 7  | 42 | 90   | 9.4   | 9.99 |
| Q9Y581 | Insulin-like peptide INSL6<br>OS=Homo sapiens<br>GN=INSL6<br>PE=2 SV=2 - [INSL6_HUMAN]                          | 6.57  | 1   | 1 | 1 | 2  | 1.442 | 0.886 | 0.306 | 3.414 | 0.00   | 6.57  | 1  | 2  | 213  | 24.8  | 9.67 |
| Q02241 | Kinesin-like protein KIF23<br>OS=Homo sapiens<br>GN=KIF23<br>PE=1 SV=3 - [KIF23_HUMAN]                          | 2.29  | 1   | 1 | 2 | 2  | 1.356 | 1.139 | 0.360 | 3.452 | 5.40   | 2.29  | 2  | 2  | 960  | 110.0 | 8.51 |

|        |                                                                                                                  |       |   |   |   |    |       |       |       |       |       |       |    |    |      |       |      |
|--------|------------------------------------------------------------------------------------------------------------------|-------|---|---|---|----|-------|-------|-------|-------|-------|-------|----|----|------|-------|------|
| Q6UQ28 | Placenta-expressed transcript 1 protein<br>OS=Homo sapiens<br>GN=PLET1<br>PE=2 SV=2 - [PLET1_HUMAN]              | 7.73  | 1 | 1 | 1 | 1  | 0.482 | 4.435 | 5.098 | 3.524 | 0.00  | 7.73  | 1  | 1  | 207  | 23.4  | 5.12 |
| Q9NRD5 | PRKCA-binding protein<br>OS=Homo sapiens<br>GN=PICK1<br>PE=1 SV=2 - [PICK1_HUMAN]                                | 2.65  | 1 | 1 | 1 | 2  |       | 8.212 | 7.957 | 3.539 | 1.82  | 2.65  | 1  | 2  | 415  | 46.6  | 5.30 |
| P49961 | Ectonucleoside triphosphate diphosphohydrolase 1<br>OS=Homo sapiens<br>GN=ENTPD1<br>PE=1 SV=1 - [ENTP1_HUMAN]    | 10.39 | 1 | 6 | 6 | 15 | 5.875 | 0.467 | 0.576 | 3.603 | 24.45 | 10.39 | 10 | 15 | 510  | 57.9  | 6.34 |
| Q5VVW2 | GTPase-activating Rap/Ran-GAP domain-like protein 3<br>OS=Homo sapiens<br>GN=GARNL3<br>PE=2 SV=2 - [GARL3_HUMAN] | 1.48  | 1 | 2 | 3 | 9  | 1.446 | 0.420 | 0.630 | 3.673 | 11.02 | 1.48  | 3  | 9  | 1013 | 112.8 | 7.65 |
| Q6N022 | Teneurin-4<br>OS=Homo sapiens<br>GN=TENM4<br>PE=1 SV=2 - [TEN4_HUMAN]                                            | 0.79  | 1 | 1 | 2 | 2  | 1.599 | 1.472 | 1.719 | 3.745 | 4.19  | 0.79  | 2  | 2  | 2769 | 307.8 | 6.55 |
| Q99683 | Mitogen-activated protein kinase kinase kinase 5<br>OS=Homo sapiens<br>GN=MAP3K5<br>PE=1 SV=1 - [M3K5_HUMAN]     | 2.18  | 1 | 1 | 3 | 5  | 1.667 | 0.977 | 1.999 | 4.146 | 6.14  | 2.18  | 4  | 5  | 1374 | 154.4 | 5.78 |
| P55771 | Paired box protein Pax-9<br>OS=Homo sapiens<br>GN=PAX9<br>PE=1 SV=3 - [PAX9_HUMAN]                               | 2.35  | 1 | 1 | 1 | 4  | 1.766 | 0.488 | 1.484 | 4.170 | 11.27 | 2.35  | 1  | 4  | 341  | 36.3  | 9.32 |
| Q9BRX8 | Redox-regulatory protein FAM213A<br>OS=Homo sapiens<br>GN=FAM213A<br>PE=1 SV=3 - [F213A_HUMAN]                   | 15.72 | 1 | 3 | 3 | 7  | 4.738 | 1.958 | 1.710 | 4.182 | 10.33 | 15.72 | 4  | 7  | 229  | 25.7  | 8.84 |

|        |                                                                                                           |       |   |   |   |    |       |       |       |       |       |       |    |    |      |       |      |
|--------|-----------------------------------------------------------------------------------------------------------|-------|---|---|---|----|-------|-------|-------|-------|-------|-------|----|----|------|-------|------|
| P31350 | Ribonucleoside-diphosphate reductase subunit M2<br>OS=Homo sapiens<br>GN=RRM2<br>PE=1 SV=1 - [RIR2_HUMAN] | 13.88 | 1 | 4 | 6 | 15 | 1.860 | 0.611 | 0.505 | 4.250 | 35.26 | 13.88 | 8  | 15 | 389  | 44.8  | 5.38 |
| Q14493 | Histone RNA hairpin-binding protein<br>OS=Homo sapiens<br>GN=SLBP PE=1 SV=1 - [SLBP_HUMAN]                | 8.15  | 1 | 2 | 2 | 3  | 1.698 | 1.157 | 0.976 | 4.523 | 7.44  | 8.15  | 3  | 3  | 270  | 31.3  | 7.47 |
| O60303 | Uncharacterized protein KIAA0556<br>OS=Homo sapiens<br>GN=KIAA0556<br>PE=1 SV=4 - [K0556_HUMAN]           | 1.05  | 1 | 1 | 1 | 1  | 6.954 | 3.858 | 2.332 | 4.558 | 0.00  | 1.05  | 1  | 1  | 1618 | 180.8 | 5.87 |
| A6NK85 | Pecanex-like protein 2<br>OS=Homo sapiens<br>GN=PCNXL2<br>PE=2 SV=3 - [PCX2_HUMAN]                        | 1.12  | 1 | 2 | 2 | 3  |       | 1.570 | 2.902 | 4.614 | 4.70  | 1.12  | 2  | 3  | 2137 | 237.1 | 6.76 |
| Q7Z443 | Polycystic kidney disease protein 1-like 3<br>OS=Homo sapiens<br>GN=PKD1L3<br>PE=1 SV=1 - [PK1L3_HUMAN]   | 1.04  | 1 | 1 | 1 | 2  | 3.377 | 1.880 | 0.873 | 4.784 | 0.00  | 1.04  | 1  | 2  | 1732 | 195.8 | 8.48 |
| Q81WV2 | Contactin-4<br>OS=Homo sapiens<br>GN=CNTN4<br>PE=1 SV=1 - [CNTN4_HUMAN]                                   | 0.97  | 1 | 1 | 1 | 5  | 0.864 | 0.940 | 1.051 | 4.803 | 11.63 | 0.97  | 2  | 5  | 1026 | 113.4 | 7.47 |
| Q969S2 | Endonuclease 8-like 2<br>OS=Homo sapiens<br>GN=NEIL2<br>PE=1 SV=3 - [NEIL2_HUMAN]                         | 3.92  | 1 | 1 | 1 | 1  | 0.760 | 0.916 | 0.852 | 4.841 | 3.48  | 3.92  | 1  | 1  | 332  | 36.8  | 6.79 |
| O00194 | Ras-related protein Rab-27B<br>OS=Homo sapiens<br>GN=RAB27B<br>PE=1 SV=4 - [RB27B_HUMAN]                  | 38.53 | 1 | 6 | 8 | 17 | 5.953 | 0.726 | 0.618 | 4.888 | 34.50 | 38.53 | 11 | 17 | 218  | 24.6  | 5.52 |
| O75829 | Leukocyte cell-derived chemotaxin 1<br>OS=Homo sapiens<br>GN=LECT1<br>PE=1 SV=1 - [LECT1_HUMAN]           | 1.80  | 1 | 1 | 1 | 1  | 1.233 | 2.680 | 4.508 | 5.455 | 0.00  | 1.80  | 1  | 1  | 334  | 37.1  | 7.56 |

|        |                                                                                                                         |       |   |   |   |    |       |       |       |       |       |       |   |      |       |       |      |
|--------|-------------------------------------------------------------------------------------------------------------------------|-------|---|---|---|----|-------|-------|-------|-------|-------|-------|---|------|-------|-------|------|
| Q5TIE3 | von Willebrand factor A domain-containing protein 5B1<br>OS=Homo sapiens<br>GN=VWA5B1<br>PE=1 SV=2 - [VW5B1_HUMA]       | 0.74  | 1 | 1 | 1 | 2  | 0.891 | 1.343 | 5.640 | 4.37  | 0.74  | 1     | 2 | 1220 | 133.7 | 8.15  |      |
| O00294 | Tubby-related protein 1<br>OS=Homo sapiens<br>GN=TULP1<br>PE=1 SV=3 - [TULP1_HUMAN]                                     | 2.40  | 1 | 1 | 1 | 2  | 0.780 | 5.722 | 6.813 | 6.18  | 2.40  | 1     | 2 | 542  | 60.6  | 9.47  |      |
| P08571 | Monocyte differentiation antigen CD14<br>OS=Homo sapiens<br>GN=CD14<br>PE=1 SV=2 - [CD14_HUMAN]                         | 2.67  | 1 | 1 | 1 | 2  | 7.996 | 0.605 | 0.523 | 6.912 | 3.47  | 2.67  | 1 | 2    | 375   | 40.1  | 6.23 |
| P61626 | Lysozyme C<br>OS=Homo sapiens<br>GN=LYZ PE=1 SV=1 - [LYSC_HUMAN]                                                        | 19.59 | 1 | 3 | 3 | 12 | 0.205 | 1.059 | 1.061 | 9.766 | 24.55 | 19.59 | 5 | 12   | 148   | 16.5  | 9.16 |
| Q9UPR0 | Inactive phospholipase C-like protein 2<br>OS=Homo sapiens<br>GN=PLCL2<br>PE=1 SV=2 - [PLCL2_HUMAN]                     | 1.69  | 1 | 1 | 1 | 1  | 8.755 | 6.012 |       | 1.66  | 1.69  | 1     | 1 | 1127 | 125.8 | 6.90  |      |
| Q9Y283 | Inversin<br>OS=Homo sapiens<br>GN=INVS PE=1 SV=2 - [INVS_HUMAN]                                                         | 1.13  | 1 | 1 | 1 | 1  | 0.818 | 5.644 |       | 2.11  | 1.13  | 1     | 1 | 1065 | 117.8 | 9.35  |      |
| A8MVM7 | Putative uncharacterized protein<br>ENSP00000382790<br>OS=Homo sapiens<br>PE=5 SV=3 - [YD021_HUMAN]                     | 3.15  | 1 | 1 | 2 | 3  | 7.246 | 3.262 |       | 8.82  | 3.15  | 2     | 3 | 634  | 73.4  | 9.79  |      |
| Q9Y6A5 | Transforming acidic coiled-coil-containing protein 3<br>OS=Homo sapiens<br>GN=TACC3<br>PE=1 SV=1 - [TACC3_HUMAN]        | 3.10  | 1 | 1 | 2 | 2  | 1.377 | 3.123 | 3.175 |       | 5.40  | 3.10  | 2 | 2    | 838   | 90.3  | 5.05 |
| Q13698 | Voltage-dependent L-type calcium channel subunit alpha-1S<br>OS=Homo sapiens<br>GN=CACNA1S<br>PE=1 SV=4 - [CAC1S_HUMAN] | 0.75  | 1 | 2 | 2 | 3  | 0.886 | 1.675 | 2.701 |       | 8.31  | 0.75  | 2 | 3    | 1873  | 212.2 | 6.57 |

|        |                                                                                                                          |       |   |   |   |    |       |       |       |       |       |    |      |       |      |      |
|--------|--------------------------------------------------------------------------------------------------------------------------|-------|---|---|---|----|-------|-------|-------|-------|-------|----|------|-------|------|------|
| Q9H2J7 | Sodium-dependent neutral amino acid transporter<br>B(0)AT2<br>OS=Homo sapiens<br>GN=SLC6A15<br>PE=1 SV=1 - [S6A15_HUMAN] | 3.56  | 1 | 2 | 2 | 2  | 1.068 | 2.604 | 2.02  | 3.56  | 2     | 2  | 730  | 81.8  | 5.19 |      |
| Q8N128 | Protein FAM177A1<br>OS=Homo sapiens<br>GN=FAM177A1<br>PE=1 SV=1 - [F177A_HUMAN]                                          | 10.80 | 1 | 2 | 2 | 3  | 0.640 | 1.154 | 2.575 | 8.41  | 10.80 | 2  | 3    | 213   | 23.7 | 4.45 |
| P42658 | Dipeptidyl aminopeptidase-like protein 6<br>OS=Homo sapiens<br>GN=DPP6<br>PE=1 SV=2 - [DPP6_HUMAN]                       | 1.97  | 1 | 1 | 1 | 1  |       | 2.376 | 0.00  | 1.97  | 1     | 1  | 865  | 97.5  | 6.37 |      |
| Q13733 | Sodium/potassium-transporting ATPase subunit alpha-4<br>OS=Homo sapiens<br>GN=ATP1A4<br>PE=1 SV=3 - [AT1A4_HUMAN]        | 9.82  | 1 | 1 | 9 | 35 |       | 2.281 | 93.21 | 9.82  | 15    | 35 | 1029 | 114.1 | 6.64 |      |
| Q5GH70 | XK-related protein 9<br>OS=Homo sapiens<br>GN=XKR9<br>PE=2 SV=1 - [XKR9_HUMAN]                                           | 2.14  | 1 | 1 | 1 | 1  | 0.654 | 4.124 | 2.252 | 1.73  | 2.14  | 1  | 1    | 373   | 43.4 | 8.22 |
| Q86V14 | Lysosomal-associated transmembrane protein 4B<br>OS=Homo sapiens<br>GN=LAPTM4B<br>PE=1 SV=1 - [LAP4B_HUMAN]              | 12.16 | 1 | 2 | 2 | 4  |       | 2.134 | 6.86  | 12.16 | 2     | 4  | 370  | 41.1  | 8.97 |      |
| Q96L96 | Alpha-protein kinase 3<br>OS=Homo sapiens<br>GN=ALPK3<br>PE=2 SV=2 - [ALPK3_HUMAN]                                       | 1.05  | 1 | 1 | 1 | 1  |       | 2.077 | 2.62  | 1.05  | 1     | 1  | 1907 | 201.1 | 7.58 |      |
| O43364 | Homeobox protein Hox-A2<br>OS=Homo sapiens<br>GN=HOXA2<br>PE=1 SV=1 - [HXA2_HUMAN]                                       | 3.99  | 1 | 1 | 1 | 1  | 1.316 | 2.014 | 3.04  | 3.99  | 1     | 1  | 376  | 41.0  | 5.81 |      |



|        |                                                                                                             |      |   |   |   |   |       |       |       |      |      |   |     |       |      |       |
|--------|-------------------------------------------------------------------------------------------------------------|------|---|---|---|---|-------|-------|-------|------|------|---|-----|-------|------|-------|
| Q5H9M0 | PWWP domain-containing protein MUM1L1<br>OS=Homo sapiens<br>GN=MUM1L1<br>PE=2 SV=1 - [MUM1L1_HUMAN]         | 2.87 | 1 | 1 | 1 | 2 |       | 1.969 | 3.12  | 2.87 | 1    | 2 | 696 | 79.0  | 4.97 |       |
| Q9Y2G7 | Zinc finger protein 30 homolog<br>OS=Homo sapiens<br>GN=ZFP30<br>PE=2 SV=1 - [ZFP30_HUMAN]                  | 2.89 | 1 | 1 | 1 | 1 | 0.829 | 1.926 | 0.00  | 2.89 | 1    | 1 | 519 | 61.5  | 8.91 |       |
| Q9UI46 | Dynein intermediate chain 1, axonemal<br>OS=Homo sapiens<br>GN=DNAI1<br>PE=1 SV=1 - [DNAI1_HUMAN]           | 2.86 | 1 | 1 | 1 | 1 |       | 1.924 | 2.01  | 2.86 | 1    | 1 | 699 | 79.2  | 6.87 |       |
| O43155 | Leucine-rich repeat transmembrane protein FLRT2<br>OS=Homo sapiens<br>GN=FLRT2<br>PE=1 SV=1 - [FLRT2_HUMAN] | 6.06 | 1 | 2 | 2 | 3 | 1.050 | 0.501 | 1.710 | 0.00 | 6.06 | 2 | 3   | 660   | 74.0 | 7.80  |
| Q6P4F1 | Alpha-(1,3)-fucosyltransferase 10<br>OS=Homo sapiens<br>GN=FUT10<br>PE=2 SV=2 - [FUT10_HUMAN]               | 1.46 | 1 | 1 | 1 | 1 | 0.514 | 1.684 | 0.00  | 1.46 | 1    | 1 | 479 | 56.1  | 8.37 |       |
| Q8TDF5 | Neuropilin and tolloid-like protein 1<br>OS=Homo sapiens<br>GN=NETO1<br>PE=2 SV=2 - [NETO1_HUMAN]           | 5.07 | 1 | 1 | 1 | 3 | 0.674 | 1.020 | 1.650 | 7.94 | 5.07 | 1 | 3   | 533   | 60.2 | 7.02  |
| O60296 | Trafficking kinesin-binding protein 2<br>OS=Homo sapiens<br>GN=TRAK2<br>PE=1 SV=2 - [TRAK2_HUMAN]           | 8.97 | 1 | 3 | 3 | 3 |       | 1.593 | 4.81  | 8.97 | 3    | 3 | 914 | 101.4 | 5.24 |       |
| Q96L16 | Putative ALMS1-like protein<br>OS=Homo sapiens<br>GN=ALMS1P<br>PE=5 SV=1 - [ALM1L_HUMAN]                    | 7.62 | 1 | 2 | 2 | 4 |       | 2.923 | 1.529 | 6.61 | 7.62 | 2 | 4   | 210   | 24.6 | 10.68 |

|        |                                                                                                               |      |   |   |   |   |       |       |       |       |      |   |      |       |       |      |
|--------|---------------------------------------------------------------------------------------------------------------|------|---|---|---|---|-------|-------|-------|-------|------|---|------|-------|-------|------|
| P02730 | Band 3 anion transport protein<br>OS=Homo sapiens<br>GN=SLC4A1<br>PE=1 SV=3 - [B3AT_HUMAN]                    | 1.43 | 1 | 1 | 1 | 1 | 1.252 | 1.446 | 0.00  | 1.43  | 1    | 1 | 911  | 101.7 | 5.19  |      |
| A6NEQ2 | Protein FAM181B<br>OS=Homo sapiens<br>GN=FAM181B<br>PE=2 SV=1 - [F181B_HUMAN]                                 | 4.69 | 1 | 1 | 1 | 1 | 0.864 | 0.623 | 1.393 | 0.00  | 4.69 | 1 | 1    | 426   | 42.6  | 5.58 |
| Q96FS4 | Signal-induced proliferation-associated protein 1<br>OS=Homo sapiens<br>GN=SIPA1<br>PE=1 SV=1 - [SIPA1_HUMAN] | 1.34 | 2 | 1 | 2 | 6 | 1.097 | 1.350 | 13.53 | 1.34  | 3    | 6 | 1042 | 112.1 | 6.60  |      |
| Q6J9G0 | Tyrosine-protein kinase STYK1<br>OS=Homo sapiens<br>GN=STYK1<br>PE=1 SV=4 - [STYK1_HUMAN]                     | 4.03 | 1 | 1 | 1 | 1 | 1.222 | 1.872 | 1.344 | 2.48  | 4.03 | 1 | 1    | 422   | 47.5  | 7.40 |
| Q8N3Z6 | Zinc finger CCHC domain-containing protein 7<br>OS=Homo sapiens<br>GN=ZCCHC7<br>PE=1 SV=2 - [ZCHC7_HUMAN]     | 1.66 | 1 | 1 | 1 | 1 | 1.685 | 0.743 | 1.300 | 1.62  | 1.66 | 1 | 1    | 543   | 63.0  | 7.33 |
| Q8WXI4 | Acyl-coenzyme A thioesterase 11<br>OS=Homo sapiens<br>GN=ACOT11<br>PE=1 SV=1 - [ACO11_HUMAN]                  | 1.32 | 1 | 1 | 1 | 1 | 0.913 | 1.225 | 2.25  | 1.32  | 1    | 1 | 607  | 68.4  | 8.35  |      |
| P13928 | Annexin A8<br>OS=Homo sapiens<br>GN=ANXA8<br>PE=1 SV=3 - [ANXA8_HUMAN]                                        | 4.59 | 3 | 1 | 2 | 3 | 1.648 | 1.225 | 6.70  | 4.59  | 2    | 3 | 327  | 36.9  | 5.78  |      |
| Q9GZU2 | Paternally-expressed gene 3 protein<br>OS=Homo sapiens<br>GN=PEG3<br>PE=1 SV=1 - [PEG3_HUMAN]                 | 5.23 | 1 | 4 | 5 | 7 | 0.984 | 0.866 | 1.213 | 17.15 | 5.23 | 5 | 7    | 1588  | 180.7 | 5.48 |
| P59894 | Doublecortin domain-containing protein 1<br>OS=Homo sapiens<br>GN=DCDC1<br>PE=2 SV=2 - [DCDC1_HUMAN]          | 2.54 | 1 | 1 | 1 | 2 | 0.666 | 0.977 | 1.192 | 3.17  | 2.54 | 1 | 2    | 354   | 39.8  | 9.36 |

|        |                                                                                                               |       |   |   |   |    |       |       |       |       |       |    |    |      |       |      |
|--------|---------------------------------------------------------------------------------------------------------------|-------|---|---|---|----|-------|-------|-------|-------|-------|----|----|------|-------|------|
| Q7RTU9 | Stereodilin<br>OS=Homo sapiens<br>GN=STRC<br>PE=2 SV=1 - [STRC_HUMAN]                                         | 3.72  | 1 | 1 | 3 | 7  | 1.912 | 1.890 | 1.183 | 8.00  | 3.72  | 4  | 7  | 1775 | 192.8 | 5.41 |
| Q9NVM6 | DnaJ homolog subfamily C member 17<br>OS=Homo sapiens<br>GN=DNAJC17<br>PE=1 SV=1 - [DJC17_HUMAN]              | 4.28  | 1 | 1 | 1 | 2  |       |       | 1.179 | 4.25  | 4.28  | 1  | 2  | 304  | 34.7  | 8.53 |
| P0C6C1 | Ankyrin repeat domain-containing protein 34C<br>OS=Homo sapiens<br>GN=ANKRD34C<br>PE=2 SV=2 - [AN34C_HUMAN]   | 4.67  | 1 | 1 | 2 | 4  | 1.717 | 0.762 | 1.178 | 9.69  | 4.67  | 2  | 4  | 535  | 58.2  | 9.03 |
| Q9H4P4 | E3 ubiquitin-protein ligase NRDP1<br>OS=Homo sapiens<br>GN=RNF41<br>PE=1 SV=2 - [RNF41_HUMAN]                 | 3.79  | 1 | 1 | 1 | 2  |       |       | 1.161 | 4.28  | 3.79  | 1  | 2  | 317  | 35.9  | 6.14 |
| Q96DX4 | RING finger and SPRY domain-containing protein 1<br>OS=Homo sapiens<br>GN=RSPRY1<br>PE=2 SV=1 - [RSPRY_HUMAN] | 5.56  | 1 | 1 | 2 | 3  |       | 1.053 | 1.155 | 6.29  | 5.56  | 2  | 3  | 576  | 64.1  | 5.57 |
| Q96FX2 | DPH3 homolog<br>OS=Homo sapiens<br>GN=DPH3<br>PE=1 SV=1 - [DPH3_HUMAN]                                        | 25.61 | 1 | 1 | 1 | 1  | 0.583 | 0.885 | 1.149 | 0.00  | 25.61 | 1  | 1  | 82   | 9.2   | 4.09 |
| Q9BTC8 | Metastasis-associated protein MTA3<br>OS=Homo sapiens<br>GN=MTA3<br>PE=1 SV=2 - [MTA3_HUMAN]                  | 10.44 | 1 | 2 | 6 | 14 | 1.099 | 1.389 | 1.123 | 25.49 | 10.44 | 10 | 14 | 594  | 67.5  | 8.57 |
| Q9HCJ5 | Zinc finger SWIM domain-containing protein 6<br>OS=Homo sapiens<br>GN=ZSWIM6<br>PE=1 SV=2 - [ZSWIM6_HUMAN]    | 1.07  | 1 | 1 | 1 | 1  | 0.973 | 0.860 | 1.098 | 1.79  | 1.07  | 1  | 1  | 1215 | 133.4 | 7.36 |

|        |                                                                                                                  |      |   |   |   |    |       |       |       |       |      |   |     |      |       |      |
|--------|------------------------------------------------------------------------------------------------------------------|------|---|---|---|----|-------|-------|-------|-------|------|---|-----|------|-------|------|
| Q5TEZ5 | Uncharacterized protein<br>C6orf163<br>OS=Homo sapiens<br>GN=C6orf163<br>PE=1 SV=2 - [CF163_HUMAN]               | 2.43 | 1 | 1 | 1 | 1  | 0.884 | 1.079 | 2.17  | 2.43  | 1    | 1 | 329 | 38.5 | 6.96  |      |
| Q92608 | Dedicator of cytokinesis protein 2<br>OS=Homo sapiens<br>GN=DOCK2<br>PE=1 SV=2 - [DOCK2_HUMAN]                   | 1.37 | 1 | 2 | 2 | 3  | 0.173 | 1.050 | 1.057 | 6.54  | 1.37 | 2 | 3   | 1830 | 211.8 | 6.87 |
| Q9NS40 | Potassium voltage-gated channel subfamily H member 7<br>OS=Homo sapiens<br>GN=KCNH7<br>PE=2 SV=2 - [KCNH7_HUMAN] | 1.34 | 1 | 1 | 1 | 1  | 1.548 | 1.049 | 1.041 | 0.00  | 1.34 | 1 | 1   | 1196 | 134.9 | 7.65 |
| Q9NS91 | E3 ubiquitin-protein ligase RAD18<br>OS=Homo sapiens<br>GN=RAD18<br>PE=1 SV=2 - [RAD18_HUMAN]                    | 6.06 | 1 | 1 | 2 | 2  | 0.942 | 1.363 | 1.017 | 2.36  | 6.06 | 2 | 2   | 495  | 56.2  | 7.58 |
| Q9NQ10 | Probable ATP-dependent RNA helicase DDX4<br>OS=Homo sapiens<br>GN=DDX4<br>PE=1 SV=2 - [DDX4_HUMAN]               | 5.25 | 1 | 1 | 4 | 18 | 0.285 | 0.486 | 0.985 | 41.67 | 5.25 | 6 | 18  | 724  | 79.3  | 5.87 |
| A4D1B5 | Gamma-secretase-activating protein<br>OS=Homo sapiens<br>GN=GSAP<br>PE=1 SV=2 - [GSAP_HUMAN]                     | 2.34 | 1 | 1 | 2 | 16 | 1.232 | 0.908 | 0.981 | 24.88 | 2.34 | 2 | 16  | 854  | 97.7  | 6.86 |
| Q9H095 | IQ domain-containing protein G<br>OS=Homo sapiens<br>GN=IQCG<br>PE=1 SV=1 - [IQCG_HUMAN]                         | 9.93 | 1 | 4 | 4 | 9  | 0.463 | 0.979 | 20.11 | 9.93  | 4    | 9 | 443 | 51.9 | 6.52  |      |
| Q96M32 | Adenylate kinase 7<br>OS=Homo sapiens<br>GN=AK7 PE=1 SV=3 - [KAD7_HUMAN]                                         | 0.83 | 1 | 1 | 1 | 1  |       | 0.975 | 1.78  | 0.83  | 1    | 1 | 723 | 82.6 | 4.74  |      |

|        |                                                                                                                                                                                                                                                                                                                                                                                                                                                                                                                                                                                                                                                                                                                                                                                                                                                                         |       |   |   |   |    |       |       |       |       |       |     |      |       |       |      |
|--------|-------------------------------------------------------------------------------------------------------------------------------------------------------------------------------------------------------------------------------------------------------------------------------------------------------------------------------------------------------------------------------------------------------------------------------------------------------------------------------------------------------------------------------------------------------------------------------------------------------------------------------------------------------------------------------------------------------------------------------------------------------------------------------------------------------------------------------------------------------------------------|-------|---|---|---|----|-------|-------|-------|-------|-------|-----|------|-------|-------|------|
| Q4VNC0 | Probable cation-transporting ATPase 13A5<br>OS=Homo sapiens<br>GN=ATP13A5<br>PE=2 SV=1 - [AT135_HUMAN<br>SH3 and multiple ankyrin repeat domains<br>protein 3<br>OS=Homo sapiens<br>GN=SHANK3<br>PE=1 SV=3 - [SHAN3_HUMAN<br>UPF0669<br>protein C6orf120<br>OS=Homo sapiens<br>GN=C6orf120<br>PE=1 SV=1 - [CF120_HUMAN ]<br>MARVEL domain-containing protein 2<br>OS=Homo sapiens<br>GN=MARVELD2<br>PE=1 SV=2 - [MALD2_HUMAN ]<br>cAMP-regulated phosphoprotein 19<br>OS=Homo sapiens<br>GN=ARPP19<br>PE=1 SV=2 - [ARP19_HUMAN<br>Basic helix-loop-helix domain-containing protein KIAA2018<br>OS=Homo sapiens<br>GN=KIAA2018<br>PE=1 SV=3 - [K2018_HUMAN ]<br>Dedicator of cytokinesis protein 4<br>OS=Homo sapiens<br>GN=DOCK4<br>PE=1 SV=3 - [DOCK4_HUMAN ]<br>SNF-related serine/threonine-protein kinase<br>OS=Homo sapiens<br>GN=SNRK<br>PE=1 SV=2 - [SNRK_HUMAN] | 1.56  | 1 | 1 | 1 | 1  | 0.521 | 0.958 | 0.00  | 1.56  | 1     | 1   | 1218 | 137.2 | 7.90  |      |
| Q9BYB0 | protein 3<br>OS=Homo sapiens<br>GN=SHANK3<br>PE=1 SV=3 - [SHAN3_HUMAN<br>UPF0669<br>protein C6orf120<br>OS=Homo sapiens<br>GN=C6orf120<br>PE=1 SV=1 - [CF120_HUMAN ]<br>MARVEL domain-containing protein 2<br>OS=Homo sapiens<br>GN=MARVELD2<br>PE=1 SV=2 - [MALD2_HUMAN ]<br>cAMP-regulated phosphoprotein 19<br>OS=Homo sapiens<br>GN=ARPP19<br>PE=1 SV=2 - [ARP19_HUMAN<br>Basic helix-loop-helix domain-containing protein KIAA2018<br>OS=Homo sapiens<br>GN=KIAA2018<br>PE=1 SV=3 - [K2018_HUMAN ]<br>Dedicator of cytokinesis protein 4<br>OS=Homo sapiens<br>GN=DOCK4<br>PE=1 SV=3 - [DOCK4_HUMAN ]<br>SNF-related serine/threonine-protein kinase<br>OS=Homo sapiens<br>GN=SNRK<br>PE=1 SV=2 - [SNRK_HUMAN]                                                                                                                                                     | 2.20  | 1 | 2 | 2 | 8  | 0.623 | 0.957 | 15.04 | 2.20  | 2     | 8   | 1731 | 184.6 | 8.88  |      |
| Q7Z4R8 | sapiens<br>GN=C6orf120<br>PE=1 SV=1 - [CF120_HUMAN ]<br>MARVEL domain-containing protein 2<br>OS=Homo sapiens<br>GN=MARVELD2<br>PE=1 SV=2 - [MALD2_HUMAN ]<br>cAMP-regulated phosphoprotein 19<br>OS=Homo sapiens<br>GN=ARPP19<br>PE=1 SV=2 - [ARP19_HUMAN<br>Basic helix-loop-helix domain-containing protein KIAA2018<br>OS=Homo sapiens<br>GN=KIAA2018<br>PE=1 SV=3 - [K2018_HUMAN ]<br>Dedicator of cytokinesis protein 4<br>OS=Homo sapiens<br>GN=DOCK4<br>PE=1 SV=3 - [DOCK4_HUMAN ]<br>SNF-related serine/threonine-protein kinase<br>OS=Homo sapiens<br>GN=SNRK<br>PE=1 SV=2 - [SNRK_HUMAN]                                                                                                                                                                                                                                                                     | 14.14 | 1 | 1 | 1 | 7  | 0.988 | 2.182 | 0.927 | 21.62 | 14.14 | 2   | 7    | 191   | 20.8  | 4.84 |
| Q8M4S9 | OS=Homo sapiens<br>GN=MARVELD2<br>PE=1 SV=2 - [MALD2_HUMAN ]<br>cAMP-regulated phosphoprotein 19<br>OS=Homo sapiens<br>GN=ARPP19<br>PE=1 SV=2 - [ARP19_HUMAN<br>Basic helix-loop-helix domain-containing protein KIAA2018<br>OS=Homo sapiens<br>GN=KIAA2018<br>PE=1 SV=3 - [K2018_HUMAN ]<br>Dedicator of cytokinesis protein 4<br>OS=Homo sapiens<br>GN=DOCK4<br>PE=1 SV=3 - [DOCK4_HUMAN ]<br>SNF-related serine/threonine-protein kinase<br>OS=Homo sapiens<br>GN=SNRK<br>PE=1 SV=2 - [SNRK_HUMAN]                                                                                                                                                                                                                                                                                                                                                                   | 1.79  | 1 | 1 | 1 | 1  | 0.924 | 1.68  | 1.79  | 1     | 1     | 558 | 64.1 | 7.53  |       |      |
| P56211 | OS=Homo sapiens<br>GN=ARPP19<br>PE=1 SV=2 - [ARP19_HUMAN<br>Basic helix-loop-helix domain-containing protein KIAA2018<br>OS=Homo sapiens<br>GN=KIAA2018<br>PE=1 SV=3 - [K2018_HUMAN ]<br>Dedicator of cytokinesis protein 4<br>OS=Homo sapiens<br>GN=DOCK4<br>PE=1 SV=3 - [DOCK4_HUMAN ]<br>SNF-related serine/threonine-protein kinase<br>OS=Homo sapiens<br>GN=SNRK<br>PE=1 SV=2 - [SNRK_HUMAN]                                                                                                                                                                                                                                                                                                                                                                                                                                                                       | 42.86 | 1 | 3 | 4 | 8  | 0.905 | 25.62 | 42.86 | 6     | 8     | 112 | 12.3 | 9.09  |       |      |
| Q68DE3 | OS=Homo sapiens<br>GN=KIAA2018<br>PE=1 SV=3 - [K2018_HUMAN ]<br>Dedicator of cytokinesis protein 4<br>OS=Homo sapiens<br>GN=DOCK4<br>PE=1 SV=3 - [DOCK4_HUMAN ]<br>SNF-related serine/threonine-protein kinase<br>OS=Homo sapiens<br>GN=SNRK<br>PE=1 SV=2 - [SNRK_HUMAN]                                                                                                                                                                                                                                                                                                                                                                                                                                                                                                                                                                                                | 1.69  | 1 | 2 | 2 | 12 | 0.439 | 0.905 | 33.36 | 1.69  | 3     | 12  | 2245 | 241.5 | 7.61  |      |
| Q8N1I0 | sapiens<br>GN=DOCK4<br>PE=1 SV=3 - [DOCK4_HUMAN ]<br>SNF-related serine/threonine-protein kinase<br>OS=Homo sapiens<br>GN=SNRK<br>PE=1 SV=2 - [SNRK_HUMAN]                                                                                                                                                                                                                                                                                                                                                                                                                                                                                                                                                                                                                                                                                                              | 0.66  | 1 | 1 | 1 | 1  | 0.571 | 0.474 | 0.817 | 4.40  | 0.66  | 1   | 1    | 1966  | 225.1 | 7.65 |
| Q9NRH2 | OS=Homo sapiens<br>GN=SNRK<br>PE=1 SV=2 - [SNRK_HUMAN]                                                                                                                                                                                                                                                                                                                                                                                                                                                                                                                                                                                                                                                                                                                                                                                                                  | 1.96  | 1 | 1 | 1 | 1  | 1.066 | 0.689 | 0.783 | 2.44  | 1.96  | 1   | 1    | 765   | 84.2  | 7.06 |

|        |                                                                                                                                                                                                            |       |   |   |    |     |       |       |       |        |       |    |     |      |       |      |
|--------|------------------------------------------------------------------------------------------------------------------------------------------------------------------------------------------------------------|-------|---|---|----|-----|-------|-------|-------|--------|-------|----|-----|------|-------|------|
| Q96PV0 | Ras/Rap<br>GTPase-<br>activating<br>protein SynGAP<br>OS=Homo<br>sapiens<br>GN=SYNGAP1<br>PE=1 SV=4 -<br>[SYGP1_HUMAN<br>]<br>Pseudouridylat<br>e synthase 7<br>homolog-like<br>protein                    | 1.41  | 2 | 1 | 2  | 3   | 1.988 | 0.203 | 0.759 | 8.84   | 1.41  | 3  | 3   | 1343 | 148.2 | 8.98 |
| Q9H0K6 | OS=Homo<br>sapiens<br>GN=PUS7L<br>PE=1 SV=1 -<br>[PUS7L_HUMAN<br>]<br>Protein<br>cornichon<br>homolog 4                                                                                                    | 1.28  | 1 | 1 | 1  | 1   |       | 0.715 |       | 0.00   | 1.28  | 1  | 1   | 701  | 80.6  | 7.56 |
| Q9P003 | OS=Homo<br>sapiens<br>GN=CNIH4<br>PE=1 SV=1 -<br>[CNIH4_HUMAN<br>]<br>TFIIH basal<br>transcription<br>factor complex<br>helicase XPD<br>subunit                                                            | 14.39 | 1 | 1 | 1  | 2   |       | 0.713 |       | 6.58   | 14.39 | 2  | 2   | 139  | 16.1  | 6.65 |
| P18074 | OS=Homo<br>sapiens<br>GN=ERCC2<br>PE=1 SV=1 -<br>[ERCC2_HUMAN<br>]<br>Alpha-<br>tocopherol<br>transfer<br>protein                                                                                          | 1.84  | 1 | 1 | 2  | 2   | 1.564 | 0.669 |       | 5.93   | 1.84  | 2  | 2   | 760  | 86.9  | 7.15 |
| P49638 | OS=Homo<br>sapiens<br>GN=TTPA<br>PE=1 SV=1 -<br>[TTPA_HUMAN]                                                                                                                                               | 4.68  | 1 | 1 | 1  | 1   | 1.453 | 0.651 |       | 2.06   | 4.68  | 1  | 1   | 278  | 31.7  | 7.66 |
| P05534 | HLA class I<br>histocompatibili<br>ty antigen, A-<br>24 alpha chain<br>OS=Homo<br>sapiens<br>GN=HLA-A<br>PE=1 SV=2 -<br>[1A24_HUMAN]                                                                       | 44.93 | 2 | 2 | 20 | 167 |       | 0.641 |       | 405.71 | 44.93 | 32 | 167 | 365  | 40.7  | 6.34 |
| P24522 | Growth arrest<br>and DNA<br>damage-<br>inducible<br>protein<br>GADD45 alpha<br>OS=Homo<br>sapiens<br>GN=GADD45A<br>PE=1 SV=1 -<br>[GA45A_HUMAN<br>]<br>Putative<br>uncharacterize<br>d protein<br>C18orf15 | 7.27  | 1 | 1 | 1  | 1   | 0.903 | 0.619 |       | 2.29   | 7.27  | 1  | 1   | 165  | 18.3  | 4.50 |
| Q96N68 | OS=Homo<br>sapiens<br>GN=C18orf15<br>PE=5 SV=1 -<br>[CR015_HUMAN<br>]                                                                                                                                      | 4.42  | 1 | 1 | 1  | 1   | 1.093 | 0.668 | 0.594 | 3.10   | 4.42  | 1  | 1   | 181  | 19.1  | 7.46 |

|        |                                                                                                                                     |       |   |   |   |   |       |       |       |       |       |   |     |       |      |      |
|--------|-------------------------------------------------------------------------------------------------------------------------------------|-------|---|---|---|---|-------|-------|-------|-------|-------|---|-----|-------|------|------|
| Q5TF21 | Protein SOGA3<br>OS=Homo sapiens<br>GN=SOGA3<br>PE=2 SV=1 - [SOGA3_HUMAN]                                                           | 5.17  | 1 | 1 | 2 | 4 | 1.391 | 0.590 | 7.07  | 5.17  | 2     | 4 | 947 | 103.1 | 6.06 |      |
| Q9H159 | Cadherin-19<br>OS=Homo sapiens<br>GN=CDH19<br>PE=2 SV=1 - [CAD19_HUMAN]                                                             | 1.94  | 1 | 1 | 1 | 1 | 1.360 | 0.249 | 0.556 | 2.29  | 1.94  | 1 | 1   | 772   | 86.9 | 4.73 |
| Q9H8M1 | Coenzyme Q-binding protein COQ10 homolog B, mitochondrial<br>OS=Homo sapiens<br>GN=COQ10B<br>PE=2 SV=1 - [CQ10B_HUMAN]              | 3.36  | 1 | 1 | 1 | 1 | 2.178 | 0.597 | 0.548 | 2.48  | 3.36  | 1 | 1   | 238   | 27.1 | 9.60 |
| Q9NX18 | Succinate dehydrogenase assembly factor 2, mitochondrial<br>OS=Homo sapiens<br>GN=SDHAF2<br>PE=1 SV=1 - [SDHF2_HUMAN]               | 10.84 | 1 | 1 | 2 | 6 | 0.632 | 1.283 | 0.527 | 13.50 | 10.84 | 2 | 6   | 166   | 19.6 | 6.80 |
| P11474 | Steroid hormone receptor ERR1<br>OS=Homo sapiens<br>GN=ESRRA<br>PE=1 SV=3 - [ERR1_HUMAN]                                            | 4.96  | 1 | 2 | 2 | 2 |       | 0.502 | 3.96  | 4.96  | 2     | 2 | 423 | 45.5  | 6.38 |      |
| Q12805 | EGF-containing fibulin-like extracellular matrix protein 1<br>OS=Homo sapiens<br>GN=EFEMP1<br>PE=1 SV=2 - [FBLN3_HUMAN]             | 1.83  | 1 | 1 | 1 | 1 |       | 0.489 | 2.75  | 1.83  | 1     | 1 | 493 | 54.6  | 5.07 |      |
| Q9NWX8 | Phosphoprotein associated with glycosphingolipid-enriched microdomains 1<br>OS=Homo sapiens<br>GN=PAG1<br>PE=1 SV=2 - [PHAG1_HUMAN] | 13.66 | 1 | 3 | 3 | 4 | 1.060 | 0.465 | 15.08 | 13.66 | 4     | 4 | 432 | 47.0  | 4.65 |      |
| Q9BUL9 | Ribonuclease P protein subunit p25<br>OS=Homo sapiens<br>GN=RPP25<br>PE=1 SV=1 - [RPP25_HUMAN]                                      | 6.53  | 1 | 1 | 1 | 1 | 1.165 | 0.915 | 0.456 | 3.69  | 6.53  | 1 | 1   | 199   | 20.6 | 9.61 |
| O75564 | Jerky protein homolog<br>OS=Homo sapiens<br>GN=JRK<br>PE=1 SV=2 - [JERKY_HUMAN]                                                     | 6.35  | 1 | 1 | 1 | 1 | 1.086 | 1.196 | 0.446 | 2.53  | 6.35  | 1 | 1   | 520   | 57.4 | 8.15 |

|        |                                                                                                                                                      |      |   |   |   |   |       |       |       |      |      |     |      |       |       |      |
|--------|------------------------------------------------------------------------------------------------------------------------------------------------------|------|---|---|---|---|-------|-------|-------|------|------|-----|------|-------|-------|------|
| Q9NWS6 | Protein<br>FAM118A<br>OS=Homo<br>sapiens<br>GN=FAM118A<br>PE=1 SV=2 -<br>[F118A_HUMAN<br>]<br>Trichoplein<br>keratin<br>filament-<br>binding protein | 3.64 | 1 | 1 | 1 | 1 | 0.538 | 1.306 | 0.299 | 4.98 | 3.64 | 1   | 1    | 357   | 40.2  | 6.09 |
| Q9BT92 | OS=Homo<br>sapiens<br>GN=TCHP<br>PE=1 SV=1 -<br>[TCHP_HUMAN]<br>PHD finger<br>protein 12                                                             | 4.42 | 1 | 2 | 2 | 2 | 0.190 | 0.218 | 4.21  | 4.42 | 2    | 2   | 498  | 61.0  | 6.54  |      |
| Q96QT6 | OS=Homo<br>sapiens<br>GN=PHF12<br>PE=1 SV=2 -<br>[PHF12_HUMAN<br>]<br>Inactive<br>peptidyl-prolyl<br>cis-trans<br>isomerase                          | 2.39 | 1 | 1 | 2 | 2 | 0.029 | 0.142 | 3.24  | 2.39 | 2    | 2   | 1004 | 109.6 | 7.74  |      |
| O75344 | FKBP6<br>OS=Homo<br>sapiens<br>GN=FKBP6<br>PE=1 SV=1 -<br>[FKBP6_HUMAN<br>]<br>N-<br>glycosylase/DNA<br>lyase                                        | 6.12 | 1 | 1 | 1 | 2 | 0.485 | 0.438 | 0.00  | 6.12 | 1    | 2   | 327  | 37.2  | 6.89  |      |
| O15527 | OS=Homo<br>sapiens<br>GN=OGG1<br>PE=1 SV=2 -<br>[OGG1_HUMAN]<br>Carboxypeptida<br>se A4                                                              | 6.67 | 1 | 1 | 1 | 1 | 1.020 | 0.450 | 2.30  | 6.67 | 1    | 1   | 345  | 38.8  | 8.60  |      |
| Q9UI42 | OS=Homo<br>sapiens<br>GN=CPA4<br>PE=1 SV=2 -<br>[CBPA4_HUMAN<br>]<br>Neural cell<br>adhesion<br>molecule L1                                          | 1.66 | 1 | 1 | 1 | 1 | 0.469 | 2.97  | 1.66  | 1    | 1    | 421 | 47.3 | 6.70  |       |      |
| P32004 | OS=Homo<br>sapiens<br>GN=LICAM<br>PE=1 SV=2 -<br>[LICAM_HUMAN<br>]<br>Homeobox<br>protein<br>Mohawk                                                  | 2.70 | 1 | 1 | 3 | 3 | 0.901 | 0.514 | 4.06  | 2.70 | 3    | 3   | 1257 | 139.9 | 6.24  |      |
| Q8IYA7 | OS=Homo<br>sapiens<br>GN=MKX PE=2<br>SV=2 -<br>[MKX_HUMAN]<br>Peroxisomal<br>membrane<br>protein PMP34                                               | 4.83 | 1 | 1 | 1 | 2 | 0.755 | 0.585 | 5.32  | 4.83 | 1    | 2   | 352  | 39.3  | 9.64  |      |
| O43808 | OS=Homo<br>sapiens<br>GN=SLC25A17<br>PE=1 SV=1 -<br>[PM34_HUMAN]                                                                                     | 3.91 | 1 | 1 | 1 | 1 | 0.317 | 0.622 | 0.00  | 3.91 | 1    | 1   | 307  | 34.5  | 10.08 |      |



|        |                                                                                                          |       |   |   |   |   |       |       |       |       |   |   |      |       |       |
|--------|----------------------------------------------------------------------------------------------------------|-------|---|---|---|---|-------|-------|-------|-------|---|---|------|-------|-------|
| Q8WXE1 | ATR-interacting protein<br>OS=Homo sapiens<br>GN=ATRIP<br>PE=1 SV=1 - [ATRIP_HUMAN]                      | 1.39  | 1 | 1 | 1 | 2 | 0.581 | 0.627 | 2.26  | 1.39  | 2 | 2 | 791  | 85.8  | 6.32  |
| Q95965 | Integrin beta-like protein 1<br>OS=Homo sapiens<br>GN=ITGBL1<br>PE=2 SV=1 - [ITGBL_HUMAN]                | 2.83  | 1 | 1 | 1 | 1 |       | 0.631 | 2.76  | 2.83  | 1 | 1 | 494  | 53.9  | 5.64  |
| Q9NYQ3 | Hydroxyacid oxidase 2<br>OS=Homo sapiens<br>GN=HAO2<br>PE=2 SV=1 - [HAOX2_HUMAN]                         | 6.84  | 1 | 1 | 1 | 1 |       | 0.688 | 0.00  | 6.84  | 1 | 1 | 351  | 38.8  | 7.64  |
| Q6PI98 | INO80 complex subunit C<br>OS=Homo sapiens<br>GN=INO80C<br>PE=1 SV=1 - [IN80C_HUMAN]                     | 9.90  | 1 | 1 | 1 | 3 | 0.676 | 0.698 | 8.81  | 9.90  | 1 | 3 | 192  | 20.6  | 10.02 |
| Q9Y4F4 | Protein FAM179B<br>OS=Homo sapiens<br>GN=FAM179B<br>PE=1 SV=4 - [F179B_HUMAN]                            | 0.81  | 1 | 1 | 1 | 5 | 0.464 | 0.721 | 11.47 | 0.81  | 1 | 5 | 1720 | 189.2 | 8.50  |
| P0C5Y9 | Histone H2A-Bbd type 1<br>OS=Homo sapiens<br>GN=H2AFB1<br>PE=2 SV=1 - [H2AB1_HUMAN]                      | 16.52 | 2 | 1 | 1 | 1 |       | 0.782 | 3.63  | 16.52 | 1 | 1 | 115  | 12.7  | 10.67 |
| Q0VD83 | Apolipoprotein B receptor<br>OS=Homo sapiens<br>GN=APOBR<br>PE=1 SV=2 - [APOBR_HUMAN]                    | 1.56  | 1 | 1 | 1 | 1 | 0.556 | 0.794 | 3.45  | 1.56  | 1 | 1 | 1088 | 114.8 | 4.40  |
| Q9HLD9 | DNA-directed RNA polymerase III subunit RPC6<br>OS=Homo sapiens<br>GN=POLR3F<br>PE=1 SV=1 - [RPC6_HUMAN] | 4.43  | 1 | 1 | 1 | 1 |       | 0.812 | 3.13  | 4.43  | 1 | 1 | 316  | 35.7  | 6.11  |
| Q8N1M1 | Bestrophin-3<br>OS=Homo sapiens<br>GN=BEST3<br>PE=2 SV=1 - [BEST3_HUMAN]                                 | 3.74  | 1 | 2 | 2 | 2 |       | 0.825 | 2.70  | 3.74  | 2 | 2 | 668  | 76.1  | 6.58  |
| Q9P273 | Teneurin-3<br>OS=Homo sapiens<br>GN=TENM3<br>PE=2 SV=3 - [TEN3_HUMAN]                                    | 0.93  | 1 | 1 | 1 | 3 |       | 0.831 | 6.74  | 0.93  | 1 | 3 | 2699 | 300.8 | 6.42  |

|        |                                                                                                                               |      |   |   |   |    |       |       |       |      |   |    |      |       |      |
|--------|-------------------------------------------------------------------------------------------------------------------------------|------|---|---|---|----|-------|-------|-------|------|---|----|------|-------|------|
| Q07283 | Trichohyalin<br>OS=Homo sapiens<br>GN=TCHH<br>PE=1 SV=2 - [TRHY_HUMAN]                                                        | 1.70 | 2 | 2 | 5 | 11 | 0.675 | 0.906 | 24.20 | 1.70 | 6 | 11 | 1943 | 253.8 | 5.78 |
| Q14449 | Growth factor receptor-bound protein 14<br>OS=Homo sapiens<br>GN=GRB14<br>PE=1 SV=2 - [GRB14_HUMAN]                           | 1.67 | 1 | 1 | 1 | 1  | 2.744 | 0.968 | 1.87  | 1.67 | 1 | 1  | 540  | 60.9  | 8.29 |
| Q15652 | Probable JmjC domain-containing histone demethylation protein 2C<br>OS=Homo sapiens<br>GN=JMJD1C<br>PE=1 SV=2 - [JHD2C_HUMAN] | 0.79 | 1 | 1 | 2 | 6  |       | 0.971 | 12.87 | 0.79 | 3 | 6  | 2540 | 284.3 | 7.87 |
| Q495T6 | Membrane metallo-endopeptidase-like 1<br>OS=Homo sapiens<br>GN=MME11<br>PE=1 SV=2 - [MME11_HUMAN]                             | 2.82 | 1 | 1 | 2 | 10 |       | 1.049 | 16.92 | 2.82 | 3 | 10 | 779  | 89.3  | 5.87 |
| P19022 | Cadherin-2<br>OS=Homo sapiens<br>GN=CDH2<br>PE=1 SV=4 - [CADH2_HUMAN]                                                         | 2.65 | 2 | 2 | 2 | 3  | 0.829 | 1.164 | 7.26  | 2.65 | 2 | 3  | 906  | 99.7  | 4.81 |
| Q96QS1 | Tetraspanin-32<br>OS=Homo sapiens<br>GN=TSPAN32<br>PE=2 SV=1 - [TSN32_HUMAN]                                                  | 5.00 | 1 | 1 | 1 | 1  |       | 1.229 | 2.29  | 5.00 | 1 | 1  | 320  | 34.6  | 8.40 |
| Q8NC67 | Neuropilin and tolloid-like protein 2<br>OS=Homo sapiens<br>GN=NETO2<br>PE=1 SV=1 - [NETO2_HUMAN]                             | 3.43 | 1 | 1 | 1 | 2  | 0.490 | 1.282 | 0.00  | 3.43 | 2 | 2  | 525  | 59.4  | 6.81 |
| Q0VFZ6 | Coiled-coil domain-containing protein 173<br>OS=Homo sapiens<br>GN=CCDC173<br>PE=2 SV=2 - [CC173_HUMAN]                       | 3.08 | 1 | 1 | 2 | 2  | 0.699 | 1.439 | 3.95  | 3.08 | 2 | 2  | 552  | 66.4  | 8.87 |
| Q14CW9 | Ataxin-7-like protein 3<br>OS=Homo sapiens<br>GN=ATXN7L3<br>PE=1 SV=1 - [AT7L3_HUMAN]                                         | 8.36 | 1 | 1 | 1 | 1  |       | 1.453 | 2.05  | 8.36 | 1 | 1  | 347  | 38.6  | 7.03 |

|        |                                                                                                                                |       |   |   |   |    |       |       |       |       |   |    |      |       |      |
|--------|--------------------------------------------------------------------------------------------------------------------------------|-------|---|---|---|----|-------|-------|-------|-------|---|----|------|-------|------|
| Q9Y2B5 | VPS9 domain-containing protein 1<br>OS=Homo sapiens<br>GN=VPS9D1<br>PE=2 SV=2 - [VPS9D1_HUMAN]                                 | 3.01  | 1 | 1 | 1 | 1  | 0.404 | 1.532 | 1.73  | 3.01  | 1 | 1  | 631  | 68.9  | 7.33 |
| Q14126 | Desmoglein-2<br>OS=Homo sapiens<br>GN=DSG2<br>PE=1 SV=2 - [DSG2_HUMAN]                                                         | 1.25  | 1 | 1 | 1 | 2  |       | 1.988 | 6.04  | 1.25  | 1 | 2  | 1118 | 122.2 | 5.24 |
| Q9UHA7 | Interleukin-36 alpha<br>OS=Homo sapiens<br>GN=IL36A<br>PE=1 SV=1 - [IL36A_HUMAN]                                               | 15.19 | 1 | 1 | 1 | 1  |       | 2.389 | 0.00  | 15.19 | 1 | 1  | 158  | 17.7  | 6.30 |
| Q6ZT21 | Transmembrane protein with metallophosphoesterase domain<br>OS=Homo sapiens<br>GN=TMPPE<br>PE=2 SV=2 - [TMPPE_HUMAN]           | 1.55  | 1 | 1 | 1 | 1  |       | 1.751 | 0.00  | 1.55  | 1 | 1  | 453  | 49.4  | 6.92 |
| P06276 | Cholinesterase<br>OS=Homo sapiens<br>GN=BCHE<br>PE=1 SV=1 - [CHLE_HUMAN]                                                       | 1.33  | 1 | 1 | 1 | 1  |       | 1.750 | 3.08  | 1.33  | 1 | 1  | 602  | 68.4  | 7.42 |
| Q6ZQQ2 | Spermatogenesis-associated protein 31D1<br>OS=Homo sapiens<br>GN=SPATA31D1<br>PE=2 SV=1 - [S31D1_HUMAN]                        | 1.59  | 1 | 1 | 1 | 1  |       | 1.262 | 0.00  | 1.59  | 1 | 1  | 1576 | 175.5 | 8.85 |
| Q96M69 | Leucine-rich repeat and guanylate kinase domain-containing protein<br>OS=Homo sapiens<br>GN=LRGUK<br>PE=2 SV=1 - [LRGUK_HUMAN] | 2.79  | 2 | 1 | 3 | 20 |       | 0.865 | 36.79 | 2.79  | 3 | 20 | 825  | 93.6  | 6.43 |
| Q8N0U8 | Vitamin K epoxide reductase complex subunit 1-like protein 1<br>OS=Homo sapiens<br>GN=VKORC1L1<br>PE=1 SV=2 - [VKORL_HUMAN]    | 5.68  | 1 | 1 | 1 | 1  |       | 0.839 | 3.78  | 5.68  | 1 | 1  | 176  | 19.8  | 9.13 |

|        |                                                                                                                        |       |    |   |   |    |       |       |       |   |    |      |       |      |
|--------|------------------------------------------------------------------------------------------------------------------------|-------|----|---|---|----|-------|-------|-------|---|----|------|-------|------|
| Q86US8 | Telomerase-binding protein<br>EST1A<br>OS=Homo<br>sapiens<br>GN=SMG6<br>PE=1 SV=2 -<br>[EST1A_HUMAN<br>]               | 1.48  | 1  | 1 | 2 | 2  | 0.835 | 5.17  | 1.48  | 2 | 2  | 1419 | 160.4 | 7.05 |
| Q14565 | Meiotic recombination protein<br>DMC1/LIM15<br>homolog<br>OS=Homo<br>sapiens<br>GN=DMC1<br>PE=1 SV=2 -<br>[DMC1_HUMAN] | 8.82  | 1  | 1 | 1 | 1  | 0.814 | 2.07  | 8.82  | 1 | 1  | 340  | 37.7  | 5.88 |
| Q8N998 | Coiled-coil domain-containing protein 89<br>OS=Homo<br>sapiens<br>GN=CCDC89<br>PE=2 SV=1 -<br>[CCDC89_HUMAN<br>]       | 5.61  | 1  | 2 | 2 | 2  | 0.811 | 5.13  | 5.61  | 2 | 2  | 374  | 43.8  | 5.36 |
| A6NN14 | Zinc finger protein 729<br>OS=Homo<br>sapiens<br>GN=ZNF729<br>PE=2 SV=4 -<br>[ZNF729_HUMAN<br>]                        | 3.27  | 1  | 1 | 2 | 4  | 0.761 | 7.86  | 3.27  | 3 | 4  | 1252 | 144.9 | 9.50 |
| O15090 | Zinc finger protein 536<br>OS=Homo<br>sapiens<br>GN=ZNF536<br>PE=1 SV=3 -<br>[ZNF536_HUMAN<br>]                        | 1.85  | 94 | 1 | 2 | 4  | 0.731 | 0.00  | 1.85  | 2 | 4  | 1300 | 141.3 | 7.27 |
| Q5VW38 | Protein GPR107<br>OS=Homo<br>sapiens<br>GN=GPR107<br>PE=1 SV=1 -<br>[GP107_HUMAN<br>]                                  | 3.00  | 1  | 2 | 2 | 5  | 0.708 | 13.31 | 3.00  | 2 | 5  | 600  | 66.9  | 7.24 |
| Q9NZI6 | Transcription factor CP2-like protein 1<br>OS=Homo<br>sapiens<br>GN=TFCP2L1<br>PE=2 SV=1 -<br>[TF2L1_HUMAN<br>]        | 2.51  | 1  | 1 | 1 | 1  | 0.691 | 2.01  | 2.51  | 1 | 1  | 479  | 54.6  | 7.01 |
| P17081 | Rho-related GTP-binding protein RhoQ<br>OS=Homo<br>sapiens<br>GN=RHOQ<br>PE=1 SV=2 -<br>[RHOQ_HUMAN<br>]               | 12.20 | 2  | 1 | 2 | 15 | 0.665 | 40.98 | 12.20 | 3 | 15 | 205  | 22.6  | 6.32 |
| Q6P2H3 | Centrosomal protein of 85 kDa<br>OS=Homo<br>sapiens<br>GN=CEP85<br>PE=1 SV=1 -<br>[CEP85_HUMAN<br>]                    | 3.41  | 1  | 2 | 3 | 4  | 0.575 | 4.77  | 3.41  | 4 | 4  | 762  | 85.6  | 6.00 |

|        |                                                                                                                  |      |   |   |   |   |       |       |      |   |   |      |       |      |
|--------|------------------------------------------------------------------------------------------------------------------|------|---|---|---|---|-------|-------|------|---|---|------|-------|------|
| Q6NXR4 | TELO2-interacting protein 2<br>OS=Homo sapiens<br>GN=TTI2 PE=1 SV=1 - [TTI2_HUMAN]                               | 5.31 | 1 | 2 | 2 | 3 | 0.551 | 12.14 | 5.31 | 3 | 3 | 508  | 56.9  | 7.09 |
| Q96M91 | Cilia- and flagella-associated protein 53<br>OS=Homo sapiens<br>GN=CFAP53 PE=1 SV=2 - [CFAP53_HUMAN]             | 2.92 | 1 | 1 | 1 | 1 | 0.508 | 2.09  | 2.92 | 1 | 1 | 514  | 61.8  | 8.90 |
| O00763 | Acetyl-CoA carboxylase 2<br>OS=Homo sapiens<br>GN=ACACB PE=1 SV=3 - [ACACB_HUMAN]                                | 1.42 | 1 | 1 | 3 | 4 | 0.502 | 8.64  | 1.42 | 3 | 4 | 2458 | 276.4 | 6.49 |
| Q96AT1 | Uncharacterized protein KIAA1143<br>OS=Homo sapiens<br>GN=KIAA1143 PE=1 SV=2 - [K1143_HUMAN]                     | 8.44 | 1 | 1 | 1 | 1 | 0.388 | 3.10  | 8.44 | 1 | 1 | 154  | 17.5  | 6.11 |
| Q96I51 | Williams-Beuren syndrome chromosomal region 16 protein<br>OS=Homo sapiens<br>GN=WBSR16 PE=1 SV=2 - [WBS16_HUMAN] | 2.59 | 1 | 1 | 1 | 3 | 0.354 | 7.98  | 2.59 | 2 | 3 | 464  | 50.0  | 8.40 |
